# Supplementary material for: UP-DOWN states and ripples differentially modulate membrane potential dynamics across DG, CA3, and CA1 in awake mice
Source: eLife. 2022 Jul 12;11:e69596. doi: 10.7554/eLife.69596 (PMC9275824; doi:10.7554/eLife.69596)
Supplement: Figure 1—source data 1. [file elife-69596-fig1-data1.xls]

## Sheet: Sheet1
recording_id	brain_area	cell_rank_rta	cell_rank_uds	proximodistal	no_anesthesia	identified_example	input_resistance	median_vm	median_vm_up	median_vm_down	spike_threshold	burst_index	spikes_per_burst
524201	DG	1	15	0.4	FALSE	TRUE	259.67	-67.5935	-65.6652	-68.9332	-43.6042	0	0
524202	DG	2	12	0.4	FALSE	TRUE	250.304	-63.3854	-61.6313	-64.0968	-43.0152	0.0517241	3
523701	DG	3	4	0.4	FALSE	TRUE	171.414	-63.0406	-60.8444	-65.5219	-44.8132	0.0642928	3.42105
523302	DG	4	10	0.4	FALSE	FALSE	288.635	-58.2687	-57.4025	-59.6711	-40.7015	0.097561	6
523502	DG	5	1	0.2	FALSE	TRUE	265.928	-57.1258	-52.5092	-60.4134	-43.1535	0.131941	3.77434
523901	DG	6	20	0.0666667	FALSE	FALSE	102.957	-55.76	-55.1295	-56.1771	-40.6486	0	0
523301	DG	7	7	0.4	FALSE	FALSE	223.32	-60.7654	-59.1437	-62.3036	-41.9227	0.0549828	3.2
524203	DG	8	6	0.4	FALSE	TRUE	210.567	-58.7322	-56.9059	-61.2929	-40.7296	0.234432	4
524102	DG	9	8	0.5	FALSE	TRUE	162.216	-63.0063	-60.8512	-64.6345	-43.6637	0.0376106	3.4
523801	DG	10	5	0.0666667	FALSE	FALSE	118.726	-64.6666	-61.8536	-68.2981	-45.5435	0.0758427	3.24
524002	DG	11	2	0	FALSE	FALSE	219.952	-67.5652	-64.4871	-71.5205	-43.1829	0	0
523401	DG	12	14	0.4	FALSE	FALSE	225.725	-63.6837	-62.3703	-64.3987	-43.8345	0	0
523601	DG	13	13	0.4	FALSE	TRUE	165.799	-58.658	-57.3042	-60.009	-42.4579	0.0733138	3.57143
523402	DG	14	17	0.4	FALSE	FALSE	146.278	-59.0107	-57.8734	-59.6171	-41.3795	0	0
523501	DG	15	3	0.2	FALSE	TRUE	182.671	-56.9825	-53.3602	-59.3554	-41.4535	0.0896552	3.12
523702	DG	16	21	0.4	FALSE	TRUE	266.188	-55.8857	-55.1959	-56.1489	-41.0995	0.0798591	3.4
524101	DG	17	18	0.5	FALSE	TRUE	97.4646	-60.3	-59.4347	-61.1309	-44.2696	0.141188	3.81579
524003	DG	18	11	0	FALSE	FALSE	166.549	-62.5689	-60.7082	-64.833	-45.9829	0.290795	5.34615
524001	DG	19	9	0	FALSE	FALSE	163.135	-59.6736	-57.8092	-61.3501	-46.3874	0.259769	4.17699
659202	DG	20	19	-0.9	FALSE	FALSE	265.93	-60.5917	-59.7683	-61.3899	-45.4824	0.123239	3.64583
523602	DG	21	22	0.4	FALSE	TRUE	218.807	-51.3837	-53.5746	-48.4282	-41.5715	0.0425347	4.08333
659201	DG	22	16	-0.9	FALSE	FALSE	262.902	-52.9684	-51.5253	-54.0162	-42.6255	0.274535	3.60795
719301	CA3	1	7	0.2	TRUE	FALSE	148.25	-55.1521	-54.9186	-55.6142	-43.1387	0.777778	4.9
521501	CA3	2	25		FALSE	FALSE	99.4363	-57.8506	-58.4662	-56.7578	-43.5824	0.361111	3.25
659105	CA3	3	6	0.35	FALSE	TRUE	149.801	-60.1394	-59.8249	-61.7504	-46.2785	0.458333	4.4
580601	CA3	4	15		FALSE	FALSE	79.1276	-58.639	-58.8414	-58.5103	-45.4457	0.439655	4.63636
526202	CA3	5	18	0.45	FALSE	TRUE	62.3947	-58.3247	-58.9715	-57.8562	-47.1549	0.32964	4.25
525403	CA3	6	8	0.45	FALSE	TRUE	129.896	-58.6338	-58.3302	-59.1379	-45.2183	0.44186	5.42857
525101	CA3	7	3	0.5	FALSE	FALSE	162.787	-59.4293	-58.6525	-60.1067	-44.952	0.5	4.83333
521602	CA3	8	10		FALSE	FALSE	191.926	-61.7276	-61.3472	-62.8163	-43.3915	0.46	4.6
719001	CA3	9	21	0.45	FALSE	TRUE	82.7578	-57.4998	-57.5614	-57.3948	-43.1436	0	0
520901	CA3	10	4	0.15	FALSE	FALSE	139.336	-51.4638	-50.2892	-52.8382	-38.4111	0.361111	4.33333
719103	CA3	11	22	0.15	FALSE	FALSE		-57.4226	-57.4275	-57.4123	-45.9638	0.52	4.33333
521202	CA3	12	30	0	FALSE	FALSE		-60.5427	-62.1628	-56.0524	-46.3386	0	0
525404	CA3	13	12	0.45	FALSE	TRUE		-49.0686	-48.3256	-49.9064	-39.2534	0.140625	4
719002	CA3	14	16	0.45	FALSE	TRUE	82.5578	-58.1423	-58.3292	-57.6411	-45.8758	0.644478	4.95349
520701	CA3	15	17		FALSE	FALSE	140.556	-56.2278	-55.9211	-56.4293	-44.3612	0.838762	5.04902
525003	CA3	16	29	0.5	FALSE	TRUE	98.7735	-58.3604	-59.7126	-56.4611	-46.17	0.565543	4.71875
521502	CA3	17	2		FALSE	FALSE	121.858	-53.5279	-52.414	-54.3536	-43.2926	0.327815	3.41379
521101	CA3	18	23	0.2	FALSE	FALSE	225.402	-51.1428	-51.8656	-50.2813	-40.1582	0.765531	4.65854
719303	CA3	19	19	0.2	TRUE	FALSE	100.981	-58.1735	-58.4383	-57.2365	-45.1614	0.666667	4.73684
719201	CA3	20	27	0.3	TRUE	TRUE	160.823	-52.8029	-53.8123	-52.1498	-40.7816	0.661804	4.75238
525301	CA3	21	1	0.5	FALSE	FALSE	115.392	-55.6181	-54.5321	-57.0829	-43.8868	0.619835	4.6875
525001	CA3	22	5	0.5	FALSE	TRUE	125.522	-61.2674	-60.4765	-61.6598	-46.3417	0.57931	4.94118
659101	CA3	23	24	0.35	FALSE	TRUE	140.498	-49.9976	-50.3261	-49.4036	-39.3616	0.588235	5.71429
521401	CA3	24	20		FALSE	FALSE	166.352	-56.8557	-57.743	-56.6299	-45.516	0.521739	6.46154
580201	CA3	25	13	0.3	FALSE	FALSE	115.77	-54.3027	-54.0458	-54.599	-42.272	0.398335	3.9881
580501	CA3	26	11		FALSE	FALSE	105.01	-53.7758	-53.6179	-53.8642	-43.1548	0.592033	4.48958
521302	CA3	27	28	0.2	FALSE	FALSE	124.318	-49.3633	-50.8134	-47.8438	-41.4635	0.0572807	3.33333
520702	CA3	28	31		FALSE	FALSE	140.94	-47.9548	-49.7713	-46.2599	-39.8738	0.414986	4.33083
521303	CA3	29	9	0.2	FALSE	FALSE	124.588	-56.0657	-55.7295	-56.4158	-45.5879	0.420268	3.98853
521102	CA3	30	26	0.2	FALSE	FALSE	145.669	-49.9153	-50.7979	-48.9331	-42.3026	0.238846	3.52475
521304	CA3	31	14	0.2	FALSE	FALSE	144.408	-52.7277	-52.889	-52.5559	-42.3441	0.418712	4.5124
719202	CA3	32	32	0.3	TRUE	TRUE	39.9602	-51.8547	-55.5521	-49.1441	-39.624	0.544997	5.97322
522703	CA1	1	10	0.7	FALSE	TRUE	86.9816	-54.0095	-53.1447	-55.056	-46.0634	0.439369	3.62329
523101	CA1	2	1	0.65	FALSE	FALSE	86.0598	-59.7507	-58.5979	-60.414	-51.42	0.47846	3.89552
522403	CA1	3	14	0.5	FALSE	FALSE	180.494	-55.2903	-54.7739	-56.53	-45.5126	0.473214	4.07692
524401	CA1	4	8	0.6	FALSE	FALSE		-59.4267	-58.0784	-60.0996	-48.5416	0.494012	3.83721
524304	CA1	5	12	0.5	FALSE	TRUE	119.281	-56.6518	-56.5216	-56.7493	-49.4557	0.530864	3.98969
522502	CA1	6	25	0.6	FALSE	FALSE	108.182	-51.4087	-51.1348	-51.7714	-43.9997	0.306371	3.68966
524303	CA1	7	3	0.5	FALSE	TRUE	77.8336	-58.0687	-57.4268	-58.638	-49.4174	0.353084	3.81579
523002	CA1	8	17	0.8	FALSE	FALSE	121	-59.466	-58.7091	-59.9887	-48.9434	0.47774	3.92958
522202	CA1	9	13	0.7	FALSE	TRUE	83.0416	-57.0946	-56.4962	-58.1946	-48.715	0.587639	3.86667
521701	CA1	10	19	0.5	FALSE	FALSE	125.107	-57.0396	-56.0642	-57.9777	-47.4609	0.452128	3.69565
522402	CA1	11	5	0.5	FALSE	FALSE	122.263	-53.6574	-53.045	-54.6144	-49.0198	0.194808	3.45089
522203	CA1	12	28	0.7	FALSE	TRUE	115.542	-55.9732	-56.1133	-55.7303	-50.1967	0.322065	3.93412
524301	CA1	13	20	0.5	FALSE	TRUE	117.315	-56.7252	-56.7944	-56.6696	-48.7248	0.471971	3.81022
524302	CA1	14	2	0.5	FALSE	TRUE	105.005	-57.6329	-56.3152	-58.3284	-47.7726	0.38835	4.05797
522001	CA1	15	18	0.7	FALSE	TRUE	99.1077	-59.25	-58.5519	-60.1281	-48.5765	0.841463	4.05882
522701	CA1	16	11	0.7	FALSE	TRUE	103.34	-55.4097	-53.9954	-57.0955	-45.2246	0.371373	3.62264
522503	CA1	17	7	0.6	FALSE	FALSE	121.493	-55.0138	-53.8267	-56.1096	-46.3787	0.402169	3.87149
522002	CA1	18	15	0.7	FALSE	TRUE	81.6991	-58.455	-57.5106	-59.3445	-45.949	0.620253	4.45455
522401	CA1	19	22	0.5	FALSE	FALSE	60.0511	-57.225	-57.1179	-57.3296	-47.485	0.783626	4.78571
522902	CA1	20	4	0.6	FALSE	FALSE	134.326	-54.9673	-53.8592	-55.9952	-46.793	0.455763	3.8583
521801	CA1	21	32	0.6	FALSE	FALSE	142.598	-53.4912	-55.3184	-52.4848	-48.1737	0.235882	3.9122
523201	CA1	22	6	0.7	FALSE	FALSE	151.148	-54.1595	-53.2809	-54.9739	-44.9497	0.600386	3.97444
522101	CA1	23	21	0.7	FALSE	FALSE	70.4007	-59.2548	-58.4365	-59.6426	-47.4007	0.575893	3.90909
522301	CA1	24	29	0.7	FALSE	TRUE	130.259	-55.6849	-55.8485	-55.4423	-48.6211	0.387129	4.70948
522702	CA1	25	16	0.7	FALSE	TRUE	108.713	-49.2479	-49.2703	-49.2319	-43.0387	0.238838	3.58511
522802	CA1	26	9	0.65	FALSE	TRUE	98.6327	-57.9379	-57.1973	-58.5618	-49.1566	0.526682	3.88034
522501	CA1	27	26	0.6	FALSE	FALSE	105.156	-53.5722	-53.7417	-53.4379	-45.1799	0.284314	3.66019
659203	CA1	28	27	-0.9	FALSE	FALSE	72.5158	-56.7297	-56.2335	-57.0966	-46.7435	0.226103	4.1
522201	CA1	29	24	0.7	FALSE	TRUE	120.857	-56.044	-56.0246	-56.0576	-49.1328	0.43921	3.83628
522801	CA1	30	30	0.65	FALSE	TRUE	142.594	-52.1017	-53.4481	-50.5964	-45.0814	0.217668	3.46067
524305	CA1	31	31	0.5	FALSE	TRUE	99.9659	-55.5607	-56.9743	-52.6141	-46.3504	0.409711	4.10383
523001	CA1	32	23	0.8	FALSE	FALSE	94.6057	-56.7413	-57.0462	-56.1952	-48.8738	0.334764	3.29577
