# Supplementary material for: UP-DOWN states and ripples differentially modulate membrane potential dynamics across DG, CA3, and CA1 in awake mice
Source: eLife. 2022 Jul 12;11:e69596. doi: 10.7554/eLife.69596 (PMC9275824; doi:10.7554/eLife.69596)
Supplement: Figure 2—source data 1. [file elife-69596-fig2-data1.xls]

## Sheet: ripple prob
0	524201	524202	523701	523302	523502	523901	523301	524203	524102	523801	524002	523401	523601	523402	523501	523702	524101	524003	524001	659202	523602	659201	719301	521501	659105	580601	526202	525403	525101	521602	719001	520901	719103	521202	525404	719002	520701	525003	521502	521101	719303	719201	525301	525001	659101	521401	580201	580501	521302
0.05	0.0118149	0.0179052	0.00635162	0	0.00290344	0	0	0.00463608	0	0.00485346	0	0.00437467	0	0.00747049	0.00406425	0.00968647	0.00443255	0	0.00853072	0.0226532	0	0.0297686	0	0	0	0	0	0.00813274	0.00644429	0	0	0	0.0101383	0	0.00948846	0	0.0141122	0.00749302	0.0241186	0	0	0	0	0	0	0.0178591	0.00887403	0.0230561	0.0182099
0.15	0.0118149	0.00895258	0.00635162	0	0.00290344	0.0107056	0	0	0	0	0	0.00874934	0.00278059	0.00747049	0.00812851	0.00645765	0.00443255	0	0.00284357	0.0203879	0.0150147	0.0137393	0	0	0	0.00431931	0	0	0	0	0	0	0.00506913	0.0206155	0.00948846	0	0.00705608	0.0112395	0.0241186	0	0	0	0	0.0140155	0	0.0178591	0	0.00768535	0.00910493
0.25	0	0.0179052	0	0	0	0	0	0	0	0	0	0	0	0	0.00406425	0.00968647	0.00443255	0.00315822	0	0.0158572	0	0.00686967	0	0	0	0	0.00658586	0	0	0	0	0	0.0152074	0	0.00948846	0	0.00176402	0	0.00803953	0.017458	0	0	0	0	0.0159808	0.0178591	0	0.0307414	0
0.35	0.0118149	0.0134289	0	0	0	0	0	0.00231804	0	0	0	0	0	0.00747049	0	0.00322882	0.00221628	0	0.00568715	0.0113266	0.00750733	0.00686967	0	0	0	0	0.0131717	0	0	0	0	0	0	0.041231	0	0	0.0105841	0	0.0241186	0	0	0.00767394	0.00884579	0.00467185	0	0.0267887	0	0.00768535	0.00910493
0.45	0.0118149	0.00447629	0	0.0170306	0	0	0	0	0	0.00485346	0	0	0.00278059	0.014941	0.00406425	0.00322882	0	0	0.00568715	0.00906129	0.00750733	0.0114495	0.0241684	0	0	0	0.0131717	0	0	0	0	0	0.0101383	0	0	0	0.0141122	0.00749302	0.0160791	0.017458	0	0.00383697	0.00884579	0	0.0159808	0.00446478	0	0.00768535	0
0.55	0	0	0	0	0	0	0.00478977	0	0	0	0	0	0	0.014941	0.00406425	0.00645765	0	0.00631645	0	0.00679596	0	0.00457978	0	0	0	0	0.0131717	0	0	0	0	0	0	0.0618465	0	0.0118792	0.0088201	0	0.0241186	0	0.0901233	0	0.00884579	0.0093437	0	0.00892956	0	0	0
0.65	0	0.00447629	0	0	0	0	0.00478977	0	0.00643359	0	0	0.013124	0	0.00373524	0.00406425	0.00645765	0.00443255	0.00631645	0	0.00679596	0.0150147	0.0183191	0.0241684	0	0	0	0.00658586	0	0	0	0.025202	0	0	0.0618465	0	0	0	0	0.0321581	0	0	0.00767394	0.00884579	0.0140155	0.0159808	0	0	0	0
0.75	0	0.00447629	0	0	0	0	0.00478977	0	0	0.00485346	0	0.00437467	0	0.00747049	0.00406425	0.00645765	0.00664883	0.00315822	0	0.00226532	0	0.00915957	0.0241684	0	0	0	0.00658586	0	0	0	0	0	0.0101383	0.0206155	0	0	0.00705608	0	0.0321581	0	0	0.0115109	0	0	0.0159808	0.0133943	0	0.00768535	0
0.85	0	0	0.00635162	0	0	0	0	0	0	0.00485346	0	0	0.00556118	0.00373524	0.00812851	0.00645765	0.00443255	0.00631645	0	0.0135919	0	0.00915957	0	0	0	0.00431931	0.00658586	0.00813274	0.00322215	0	0.012601	0	0	0	0	0.0118792	0.00176402	0	0.0321581	0	0	0.00383697	0	0	0	0.0178591	0.00443701	0.00768535	0
0.95	0.0236298	0.00447629	0	0	0	0.0107056	0.00957954	0.00463608	0.00643359	0.00970693	0	0.00874934	0	0.00747049	0.00406425	0.00968647	0.0088651	0.00631645	0.0142179	0.0135919	0.00750733	0.0160292	0	0.0184502	0	0	0.00658586	0	0.00322215	0	0.012601	0	0.0101383	0.0206155	0.00948846	0.00593961	0.0088201	0.00374651	0.0160791	0.017458	0	0.0115109	0	0.00467185	0.0159808	0	0	0	0
1.05	0.0294956	0.0097253	0.0266561	0.0134653	0.0155343	0	0.0294287	0.0354103	0.0306088	0.0322432	0.0238095	0.0425057	0.0379296	0.0514053	0.0358235	0.068688	0.0239428	0.050812	0.0398708	0.0198826	0.0172263	0.0604022	0.161303	0.0374637	0.0630631	0.0105464	0.0904932	0.0407766	0.0216156	0.166667	0.0330294	0.047619	0.0999117	0.0507036	0.0666032	0.0897197	0.0154319	0.0119168	0.0789408	0.0315875	0.18825	0.0312773	0.0232438	0.0253084	0.0300031	0.0564507	0.0281911	0.0137542	0.048179
1.15	0.0589911	0.0583518	0.047981	0.0269307	0.0745645	0.036244	0.0539526	0.0846769	0.107131	0.0573213	0.0595238	0.0680091	0.0487666	0.102811	0.0179117	0.0490629	0.0502799	0.0926573	0.0644067	0.0568073	0.051679	0.049743	0.13442	0.0449565	0.0840841	0.0316392	0.0904932	0.0866502	0.0576415	0.0972222	0.107346	0.0793651	0.0399647	0.0633795	0.0592028	0.103012	0.0694433	0.0715008	0.0225545	0.0157938	0.1255	0.0886189	0.0348657	0.0421806	0.0700073	0.0846761	0.0338293	0.0412625	0.0385432
1.25	0.0884867	0.106978	0.127949	0.0538613	0.0683508	0.054366	0.103	0.100073	0.0459132	0.0931471	0.047619	0.110515	0.0758591	0.0881233	0.1015	0.068688	0.0885884	0.0836904	0.0490718	0.0653284	0.0602922	0.04619	0.188187	0.089913	0.105105	0.0474588	0.0678699	0.112136	0.0792571	0.0694444	0.0908309	0.126984	0.129885	0.114083	0.103605	0.0830738	0.0694433	0.102485	0.0789408	0.0631751	0.18825	0.0781931	0.0290547	0.101233	0.10001	0.0282254	0.0789351	0.0825251	0.048179
1.35	0.0737389	0.0875277	0.0799684	0.0942573	0.111847	0.126854	0.11281	0.135483	0.107131	0.114643	0.119048	0.119016	0.105661	0.0660925	0.0955293	0.0588755	0.0981656	0.122547	0.0797416	0.0880513	0.129198	0.113698	0.13442	0.104898	0.111111	0.0949176	0.0829521	0.12233	0.108078	0.166667	0.0990883	0.0793651	0.0899206	0.114083	0.103605	0.106334	0.0823032	0.100101	0.101495	0.12635	0.141188	0.0521288	0.116219	0.101233	0.0900094	0.0564507	0.0845733	0.137542	0.154173
1.45	0.103235	0.126429	0.0799684	0.134653	0.114954	0.0906101	0.0980956	0.076979	0.137739	0.150468	0.119048	0.15302	0.116498	0.0881233	0.113441	0.068688	0.107743	0.143469	0.128813	0.0653284	0.155037	0.0781676	0.120978	0.134869	0.156156	0.0843712	0.150822	0.127427	0.133296	0.0555556	0.0908309	0.111111	0.109903	0.0507036	0.118406	0.139564	0.0925911	0.114401	0.0789408	0.189525	0.109813	0.083406	0.116219	0.126542	0.110011	0	0.0789351	0.110033	0.0674506
1.55	0.0884867	0.155605	0.127949	0.242376	0.161556	0.126854	0.147143	0.112389	0.176	0.12539	0.154762	0.119016	0.138172	0.124841	0.143294	0.107938	0.110137	0.0866794	0.138014	0.0766898	0.155037	0.0817207	0.013442	0.138616	0.12012	0.142376	0.075411	0.127427	0.122488	0.0833333	0.140375	0.111111	0.139876	0.0507036	0.0740036	0.122949	0.110595	0.112018	0.0225545	0.189525	0.0470626	0.119896	0.139463	0.126542	0.19002	0.0846761	0.124041	0.110033	0.144537
1.65	0.117982	0.0680771	0.133281	0.148119	0.127381	0.0906101	0.117715	0.11085	0.0994785	0.0859819	0.142857	0.0935125	0.121916	0.095467	0.143294	0.147189	0.107743	0.128525	0.134947	0.113615	0.0947449	0.0888268	0.0403259	0.12363	0.102102	0.152923	0.0829521	0.0764561	0.126091	0.0416667	0.140375	0.142857	0.109903	0.0633795	0.162808	0.103012	0.131171	0.152535	0.135327	0.110556	0.0313751	0.10947	0.174328	0.126542	0.10001	0.141127	0.129679	0.0687709	0.125265
1.75	0.176973	0.106978	0.213249	0.080792	0.111847	0.163098	0.127524	0.14472	0.145392	0.139721	0.154762	0.0595079	0.157137	0.132185	0.0656764	0.0981258	0.136474	0.11358	0.147215	0.119295	0.16365	0.110145	0.0537678	0.104898	0.105105	0.195108	0.113117	0.112136	0.11168	0.125	0.115603	0.111111	0.0799294	0.0633795	0.111005	0.0797508	0.136315	0.114401	0.0789408	0.142144	0.0313751	0.156386	0.151085	0.160286	0.120013	0.197578	0.107126	0.137542	0.125265
1.85	0.162226	0.194506	0.101293	0.107723	0.139808	0.163098	0.137334	0.129325	0.114783	0.0823993	0.130952	0.102014	0.127335	0.095467	0.161206	0.157001	0.162811	0.110591	0.116545	0.15906	0.0947449	0.13857	0.0268839	0.116138	0.0990991	0.158196	0.0829521	0.127427	0.126091	0.0972222	0.0660589	0.111111	0.0999117	0.0887313	0.103605	0.0897197	0.120883	0.107251	0.0676636	0.0631751	0.0156875	0.177238	0.104597	0.0843612	0.0600063	0.112901	0.180423	0.123788	0.125265
1.95	0.0294956	0.0097253	0.0426498	0.080792	0.0683508	0.126854	0.0490478	0.058504	0.0229566	0.0895645	0.047619	0.0935125	0.0596036	0.0807797	0.0776176	0.107938	0.0742227	0.0358673	0.0644067	0.113615	0.0258395	0.106592	0.0537678	0.0861666	0.0540541	0.0738248	0.0904932	0.0509707	0.100873	0.0972222	0.0660589	0.0793651	0.0399647	0.114083	0.0592028	0.0531672	0.0977351	0.0834176	0.101495	0.0157938	0.0313751	0.0573416	0.0755423	0.0590528	0.0500052	0.112901	0.140956	0.0825251	0.0867222
2.05	0.0118149	0.0179052	0.00635162	0	0.00290344	0	0	0.00463608	0	0.00485346	0	0.00437467	0	0.00747049	0.00406425	0.00968647	0.00443255	0	0.00853072	0.0226532	0	0.0297686	0	0	0	0	0	0.00813274	0.00644429	0	0	0	0.0101383	0	0.00948846	0	0.0141122	0.00749302	0.0241186	0	0	0	0	0	0	0.0178591	0.00887403	0.0230561	0.0182099
2.15	0.0118149	0.00895258	0.00635162	0	0.00290344	0.0107056	0	0	0	0	0	0.00874934	0.00278059	0.00747049	0.00812851	0.00645765	0.00443255	0	0.00284357	0.0203879	0.0150147	0.0137393	0	0	0	0.00431931	0	0	0	0	0	0	0.00506913	0.0206155	0.00948846	0	0.00705608	0.0112395	0.0241186	0	0	0	0	0.0140155	0	0.0178591	0	0.00768535	0.00910493
2.25	0	0.0179052	0	0	0	0	0	0	0	0	0	0	0	0	0.00406425	0.00968647	0.00443255	0.00315822	0	0.0158572	0	0.00686967	0	0	0	0	0.00658586	0	0	0	0	0	0.0152074	0	0.00948846	0	0.00176402	0	0.00803953	0.017458	0	0	0	0	0.0159808	0.0178591	0	0.0307414	0
2.35	0.0118149	0.0134289	0	0	0	0	0	0.00231804	0	0	0	0	0	0.00747049	0	0.00322882	0.00221628	0	0.00568715	0.0113266	0.00750733	0.00686967	0	0	0	0	0.0131717	0	0	0	0	0	0	0.041231	0	0	0.0105841	0	0.0241186	0	0	0.00767394	0.00884579	0.00467185	0	0.0267887	0	0.00768535	0.00910493
2.45	0.0118149	0.00447629	0	0.0170306	0	0	0	0	0	0.00485346	0	0	0.00278059	0.014941	0.00406425	0.00322882	0	0	0.00568715	0.00906129	0.00750733	0.0114495	0.0241684	0	0	0	0.0131717	0	0	0	0	0	0.0101383	0	0	0	0.0141122	0.00749302	0.0160791	0.017458	0	0.00383697	0.00884579	0	0.0159808	0.00446478	0	0.00768535	0
2.55	0	0	0	0	0	0	0.00478977	0	0	0	0	0	0	0.014941	0.00406425	0.00645765	0	0.00631645	0	0.00679596	0	0.00457978	0	0	0	0	0.0131717	0	0	0	0	0	0	0.0618465	0	0.0118792	0.0088201	0	0.0241186	0	0.0901233	0	0.00884579	0.0093437	0	0.00892956	0	0	0
2.65	0	0.00447629	0	0	0	0	0.00478977	0	0.00643359	0	0	0.013124	0	0.00373524	0.00406425	0.00645765	0.00443255	0.00631645	0	0.00679596	0.0150147	0.0183191	0.0241684	0	0	0	0.00658586	0	0	0	0.025202	0	0	0.0618465	0	0	0	0	0.0321581	0	0	0.00767394	0.00884579	0.0140155	0.0159808	0	0	0	0
2.75	0	0.00447629	0	0	0	0	0.00478977	0	0	0.00485346	0	0.00437467	0	0.00747049	0.00406425	0.00645765	0.00664883	0.00315822	0	0.00226532	0	0.00915957	0.0241684	0	0	0	0.00658586	0	0	0	0	0	0.0101383	0.0206155	0	0	0.00705608	0	0.0321581	0	0	0.0115109	0	0	0.0159808	0.0133943	0	0.00768535	0
2.85	0	0	0.00635162	0	0	0	0	0	0	0.00485346	0	0	0.00556118	0.00373524	0.00812851	0.00645765	0.00443255	0.00631645	0	0.0135919	0	0.00915957	0	0	0	0.00431931	0.00658586	0.00813274	0.00322215	0	0.012601	0	0	0	0	0.0118792	0.00176402	0	0.0321581	0	0	0.00383697	0	0	0	0.0178591	0.00443701	0.00768535	0
2.95	0.0236298	0.00447629	0	0	0	0.0107056	0.00957954	0.00463608	0.00643359	0.00970693	0	0.00874934	0	0.00747049	0.00406425	0.00968647	0.0088651	0.00631645	0.0142179	0.0135919	0.00750733	0.0160292	0	0.0184502	0	0	0.00658586	0	0.00322215	0	0.012601	0	0.0101383	0.0206155	0.00948846	0.00593961	0.0088201	0.00374651	0.0160791	0.017458	0	0.0115109	0	0.00467185	0.0159808	0	0	0	0
3.05	0.0294956	0.0097253	0.0266561	0.0134653	0.0155343	0	0.0294287	0.0354103	0.0306088	0.0322432	0.0238095	0.0425057	0.0379296	0.0514053	0.0358235	0.068688	0.0239428	0.050812	0.0398708	0.0198826	0.0172263	0.0604022	0.161303	0.0374637	0.0630631	0.0105464	0.0904932	0.0407766	0.0216156	0.166667	0.0330294	0.047619	0.0999117	0.0507036	0.0666032	0.0897197	0.0154319	0.0119168	0.0789408	0.0315875	0.18825	0.0312773	0.0232438	0.0253084	0.0300031	0.0564507	0.0281911	0.0137542	0.048179
3.15	0.0589911	0.0583518	0.047981	0.0269307	0.0745645	0.036244	0.0539526	0.0846769	0.107131	0.0573213	0.0595238	0.0680091	0.0487666	0.102811	0.0179117	0.0490629	0.0502799	0.0926573	0.0644067	0.0568073	0.051679	0.049743	0.13442	0.0449565	0.0840841	0.0316392	0.0904932	0.0866502	0.0576415	0.0972222	0.107346	0.0793651	0.0399647	0.0633795	0.0592028	0.103012	0.0694433	0.0715008	0.0225545	0.0157938	0.1255	0.0886189	0.0348657	0.0421806	0.0700073	0.0846761	0.0338293	0.0412625	0.0385432
3.25	0.0884867	0.106978	0.127949	0.0538613	0.0683508	0.054366	0.103	0.100073	0.0459132	0.0931471	0.047619	0.110515	0.0758591	0.0881233	0.1015	0.068688	0.0885884	0.0836904	0.0490718	0.0653284	0.0602922	0.04619	0.188187	0.089913	0.105105	0.0474588	0.0678699	0.112136	0.0792571	0.0694444	0.0908309	0.126984	0.129885	0.114083	0.103605	0.0830738	0.0694433	0.102485	0.0789408	0.0631751	0.18825	0.0781931	0.0290547	0.101233	0.10001	0.0282254	0.0789351	0.0825251	0.048179
3.35	0.0737389	0.0875277	0.0799684	0.0942573	0.111847	0.126854	0.11281	0.135483	0.107131	0.114643	0.119048	0.119016	0.105661	0.0660925	0.0955293	0.0588755	0.0981656	0.122547	0.0797416	0.0880513	0.129198	0.113698	0.13442	0.104898	0.111111	0.0949176	0.0829521	0.12233	0.108078	0.166667	0.0990883	0.0793651	0.0899206	0.114083	0.103605	0.106334	0.0823032	0.100101	0.101495	0.12635	0.141188	0.0521288	0.116219	0.101233	0.0900094	0.0564507	0.0845733	0.137542	0.154173
3.45	0.103235	0.126429	0.0799684	0.134653	0.114954	0.0906101	0.0980956	0.076979	0.137739	0.150468	0.119048	0.15302	0.116498	0.0881233	0.113441	0.068688	0.107743	0.143469	0.128813	0.0653284	0.155037	0.0781676	0.120978	0.134869	0.156156	0.0843712	0.150822	0.127427	0.133296	0.0555556	0.0908309	0.111111	0.109903	0.0507036	0.118406	0.139564	0.0925911	0.114401	0.0789408	0.189525	0.109813	0.083406	0.116219	0.126542	0.110011	0	0.0789351	0.110033	0.0674506
3.55	0.0884867	0.155605	0.127949	0.242376	0.161556	0.126854	0.147143	0.112389	0.176	0.12539	0.154762	0.119016	0.138172	0.124841	0.143294	0.107938	0.110137	0.0866794	0.138014	0.0766898	0.155037	0.0817207	0.013442	0.138616	0.12012	0.142376	0.075411	0.127427	0.122488	0.0833333	0.140375	0.111111	0.139876	0.0507036	0.0740036	0.122949	0.110595	0.112018	0.0225545	0.189525	0.0470626	0.119896	0.139463	0.126542	0.19002	0.0846761	0.124041	0.110033	0.144537
3.65	0.117982	0.0680771	0.133281	0.148119	0.127381	0.0906101	0.117715	0.11085	0.0994785	0.0859819	0.142857	0.0935125	0.121916	0.095467	0.143294	0.147189	0.107743	0.128525	0.134947	0.113615	0.0947449	0.0888268	0.0403259	0.12363	0.102102	0.152923	0.0829521	0.0764561	0.126091	0.0416667	0.140375	0.142857	0.109903	0.0633795	0.162808	0.103012	0.131171	0.152535	0.135327	0.110556	0.0313751	0.10947	0.174328	0.126542	0.10001	0.141127	0.129679	0.0687709	0.125265
3.75	0.176973	0.106978	0.213249	0.080792	0.111847	0.163098	0.127524	0.14472	0.145392	0.139721	0.154762	0.0595079	0.157137	0.132185	0.0656764	0.0981258	0.136474	0.11358	0.147215	0.119295	0.16365	0.110145	0.0537678	0.104898	0.105105	0.195108	0.113117	0.112136	0.11168	0.125	0.115603	0.111111	0.0799294	0.0633795	0.111005	0.0797508	0.136315	0.114401	0.0789408	0.142144	0.0313751	0.156386	0.151085	0.160286	0.120013	0.197578	0.107126	0.137542	0.125265
3.85	0.162226	0.194506	0.101293	0.107723	0.139808	0.163098	0.137334	0.129325	0.114783	0.0823993	0.130952	0.102014	0.127335	0.095467	0.161206	0.157001	0.162811	0.110591	0.116545	0.15906	0.0947449	0.13857	0.0268839	0.116138	0.0990991	0.158196	0.0829521	0.127427	0.126091	0.0972222	0.0660589	0.111111	0.0999117	0.0887313	0.103605	0.0897197	0.120883	0.107251	0.0676636	0.0631751	0.0156875	0.177238	0.104597	0.0843612	0.0600063	0.112901	0.180423	0.123788	0.125265
3.95	0.0294956	0.0097253	0.0426498	0.080792	0.0683508	0.126854	0.0490478	0.058504	0.0229566	0.0895645	0.047619	0.0935125	0.0596036	0.0807797	0.0776176	0.107938	0.0742227	0.0358673	0.0644067	0.113615	0.0258395	0.106592	0.0537678	0.0861666	0.0540541	0.0738248	0.0904932	0.0509707	0.100873	0.0972222	0.0660589	0.0793651	0.0399647	0.114083	0.0592028	0.0531672	0.0977351	0.0834176	0.101495	0.0157938	0.0313751	0.0573416	0.0755423	0.0590528	0.0500052	0.112901	0.140956	0.0825251	0.0867222
[truncated: 37 more columns]
