# Supplementary material for: UP-DOWN states and ripples differentially modulate membrane potential dynamics across DG, CA3, and CA1 in awake mice
Source: eLife. 2022 Jul 12;11:e69596. doi: 10.7554/eLife.69596 (PMC9275824; doi:10.7554/eLife.69596)
Supplement: Figure 3—source data 1. [file elife-69596-fig3-data1.xls]

## Sheet: DG xcorr
0	524201	524202	523701	523302	523502	523901	523301	524203	524102	523801	524002	523401	523601	523402	523501	523702	524101	524003	524001	659202	523602	659201
-4.99968	-0.0685553	-0.0291165	0.133892	0.116621	-0.0119038	-0.0937812	-0.0307548	0.0600741	-0.0949519	-0.0508599	-0.072022	0.011481	-0.0524134	-0.0246183	-0.00885603	0.0207551	0.00426515	0.0157634	-0.0555716	0.013751	0.00844263	0.0357333
-4.9992	-0.0685674	-0.0291091	0.133925	0.116642	-0.0118739	-0.0937985	-0.0307403	0.0600732	-0.0949439	-0.0508261	-0.0719739	0.0114577	-0.052404	-0.0246176	-0.00882946	0.0207418	0.00425237	0.0157722	-0.0555584	0.0137567	0.00845397	0.0357523
-4.99872	-0.0685794	-0.0291017	0.133958	0.116662	-0.0118441	-0.0938159	-0.0307257	0.0600724	-0.0949359	-0.0507922	-0.0719257	0.0114344	-0.0523946	-0.024617	-0.00880288	0.0207284	0.0042396	0.0157811	-0.0555452	0.0137625	0.0084653	0.0357713
-4.99824	-0.0685914	-0.0290943	0.133992	0.116682	-0.0118142	-0.0938334	-0.0307111	0.0600715	-0.0949278	-0.0507583	-0.0718774	0.0114111	-0.0523852	-0.0246163	-0.00877634	0.020715	0.00422683	0.0157899	-0.055532	0.0137682	0.00847664	0.0357903
-4.99776	-0.0686035	-0.0290868	0.134025	0.116702	-0.0117844	-0.093851	-0.0306966	0.0600707	-0.0949197	-0.0507244	-0.0718291	0.0113878	-0.0523758	-0.0246157	-0.00874978	0.0207016	0.00421407	0.0157987	-0.0555189	0.013774	0.00848796	0.0358093
-4.99728	-0.0686155	-0.0290793	0.134058	0.116722	-0.0117545	-0.0938687	-0.030682	0.0600698	-0.0949116	-0.0506905	-0.0717808	0.0113646	-0.0523663	-0.024615	-0.00872326	0.0206882	0.00420132	0.0158075	-0.0555057	0.0137798	0.00849928	0.0358283
-4.9968	-0.0686276	-0.0290719	0.134091	0.116742	-0.0117246	-0.0938866	-0.0306674	0.060069	-0.0949034	-0.0506566	-0.0717325	0.0113413	-0.0523569	-0.0246144	-0.00869672	0.0206747	0.00418856	0.0158163	-0.0554925	0.0137855	0.0085106	0.0358472
-4.99632	-0.0686397	-0.0290644	0.134124	0.116762	-0.0116947	-0.0939045	-0.0306529	0.0600682	-0.0948952	-0.0506227	-0.0716842	0.011318	-0.0523475	-0.0246137	-0.00867022	0.0206613	0.00417581	0.0158251	-0.0554793	0.0137913	0.00852191	0.0358662
-4.99584	-0.0686517	-0.0290569	0.134157	0.116782	-0.0116648	-0.0939226	-0.0306383	0.0600673	-0.0948871	-0.0505888	-0.0716358	0.0112948	-0.052338	-0.0246131	-0.00864369	0.0206479	0.00416306	0.0158339	-0.0554661	0.0137971	0.00853325	0.0358852
-4.99536	-0.0686638	-0.0290493	0.13419	0.116802	-0.0116349	-0.0939407	-0.0306237	0.0600665	-0.0948788	-0.0505549	-0.0715873	0.0112715	-0.0523285	-0.0246124	-0.00861719	0.0206345	0.00415032	0.0158427	-0.0554528	0.013803	0.00854455	0.0359042
-4.99488	-0.0686759	-0.0290418	0.134223	0.116822	-0.0116049	-0.093959	-0.0306092	0.0600657	-0.0948706	-0.050521	-0.0715389	0.0112483	-0.0523191	-0.0246118	-0.00859068	0.0206211	0.00413758	0.0158515	-0.0554397	0.0138088	0.00855585	0.0359232
-4.9944	-0.068688	-0.0290342	0.134256	0.116842	-0.011575	-0.0939774	-0.0305946	0.0600649	-0.0948623	-0.0504871	-0.0714904	0.0112251	-0.0523096	-0.0246112	-0.0085642	0.0206077	0.00412485	0.0158604	-0.0554264	0.0138146	0.00856714	0.0359422
-4.99392	-0.0687002	-0.0290266	0.134289	0.116861	-0.011545	-0.0939959	-0.0305801	0.0600641	-0.0948541	-0.0504532	-0.071442	0.0112019	-0.0523001	-0.0246106	-0.00853771	0.0205943	0.00411211	0.0158692	-0.0554132	0.0138204	0.00857846	0.0359612
-4.99344	-0.0687125	-0.029019	0.134322	0.116881	-0.0115151	-0.0940146	-0.0305655	0.0600633	-0.0948457	-0.0504193	-0.0713934	0.0111788	-0.0522907	-0.02461	-0.00851123	0.0205809	0.0040994	0.015878	-0.0554	0.0138262	0.00858976	0.0359801
-4.99296	-0.0687249	-0.0290114	0.134355	0.116901	-0.0114851	-0.0940334	-0.030551	0.0600625	-0.0948374	-0.0503854	-0.0713449	0.0111557	-0.0522811	-0.0246094	-0.00848474	0.0205674	0.00408669	0.0158867	-0.0553869	0.0138321	0.00860105	0.0359991
-4.99248	-0.0687373	-0.0290038	0.134388	0.11692	-0.0114551	-0.0940524	-0.0305364	0.0600617	-0.094829	-0.0503515	-0.0712963	0.0111325	-0.0522716	-0.0246088	-0.0084583	0.020554	0.00407397	0.0158955	-0.0553737	0.0138379	0.00861233	0.0360181
-4.992	-0.0687498	-0.0289961	0.134421	0.11694	-0.0114251	-0.0940714	-0.0305219	0.0600609	-0.0948206	-0.0503176	-0.0712477	0.0111094	-0.0522621	-0.0246082	-0.00843184	0.0205406	0.00406127	0.0159043	-0.0553605	0.0138438	0.00862362	0.0360371
-4.99152	-0.0687624	-0.0289884	0.134453	0.116959	-0.0113951	-0.0940905	-0.0305074	0.0600602	-0.0948122	-0.0502837	-0.0711991	0.0110864	-0.0522526	-0.0246076	-0.0084054	0.0205272	0.00404857	0.0159131	-0.0553473	0.0138496	0.00863491	0.036056
-4.99104	-0.0687751	-0.0289807	0.134486	0.116978	-0.0113651	-0.0941097	-0.0304929	0.0600594	-0.0948037	-0.0502498	-0.0711504	0.0110633	-0.0522431	-0.0246071	-0.00837896	0.0205138	0.00403588	0.0159219	-0.0553341	0.0138555	0.0086462	0.036075
-4.99056	-0.0687878	-0.028973	0.134519	0.116998	-0.0113351	-0.094129	-0.0304784	0.0600586	-0.0947952	-0.0502159	-0.0711018	0.0110403	-0.0522335	-0.0246065	-0.00835254	0.0205004	0.00402319	0.0159307	-0.0553209	0.0138613	0.00865748	0.0360939
-4.99008	-0.0688007	-0.0289653	0.134552	0.117017	-0.011305	-0.0941483	-0.0304639	0.0600579	-0.0947867	-0.0501819	-0.0710531	0.0110173	-0.052224	-0.024606	-0.00832614	0.020487	0.00401051	0.0159395	-0.0553078	0.0138672	0.00866876	0.0361129
-4.9896	-0.0688135	-0.0289575	0.134584	0.117036	-0.011275	-0.0941678	-0.0304494	0.0600571	-0.0947781	-0.050148	-0.0710044	0.0109943	-0.0522144	-0.0246054	-0.00829972	0.0204736	0.00399783	0.0159483	-0.0552946	0.0138731	0.00868003	0.0361318
-4.98912	-0.0688266	-0.0289498	0.134617	0.117056	-0.0112449	-0.0941874	-0.0304349	0.0600564	-0.0947695	-0.0501141	-0.0709556	0.0109714	-0.0522048	-0.0246049	-0.00827332	0.0204602	0.00398516	0.015957	-0.0552814	0.013879	0.0086913	0.0361508
-4.98864	-0.0688398	-0.028942	0.13465	0.117075	-0.0112148	-0.094207	-0.0304204	0.0600556	-0.0947609	-0.0500802	-0.0709069	0.0109484	-0.0521952	-0.0246044	-0.00824694	0.0204468	0.0039725	0.0159658	-0.0552682	0.0138848	0.00870257	0.0361697
-4.98816	-0.0688531	-0.0289342	0.134682	0.117094	-0.0111848	-0.0942267	-0.0304059	0.0600549	-0.0947522	-0.0500463	-0.0708581	0.0109255	-0.0521856	-0.024604	-0.00822054	0.0204334	0.00395984	0.0159746	-0.055255	0.0138907	0.00871383	0.0361886
-4.98768	-0.0688663	-0.0289264	0.134715	0.117113	-0.0111547	-0.0942465	-0.0303914	0.0600542	-0.0947435	-0.0500124	-0.0708093	0.0109026	-0.052176	-0.0246035	-0.00819419	0.02042	0.00394719	0.0159834	-0.0552418	0.0138966	0.0087251	0.0362076
-4.9872	-0.0688796	-0.0289186	0.134747	0.117132	-0.0111246	-0.0942664	-0.0303769	0.0600535	-0.0947348	-0.0499785	-0.0707605	0.0108797	-0.0521663	-0.024603	-0.00816779	0.0204065	0.00393457	0.0159921	-0.0552286	0.0139025	0.00873636	0.0362265
-4.98672	-0.0688929	-0.0289107	0.13478	0.117151	-0.0110944	-0.0942863	-0.0303624	0.0600527	-0.094726	-0.0499446	-0.0707117	0.0108568	-0.0521567	-0.0246026	-0.00814146	0.0203931	0.00392194	0.0160009	-0.0552154	0.0139084	0.00874762	0.0362454
-4.98624	-0.0689062	-0.0289028	0.134812	0.11717	-0.0110643	-0.0943063	-0.030348	0.060052	-0.0947172	-0.0499106	-0.0706628	0.0108339	-0.0521471	-0.0246022	-0.00811509	0.0203797	0.00390932	0.0160097	-0.0552022	0.0139143	0.00875888	0.0362643
-4.98576	-0.0689196	-0.028895	0.134845	0.117189	-0.0110342	-0.0943264	-0.0303335	0.0600513	-0.0947083	-0.0498767	-0.0706139	0.0108111	-0.0521374	-0.0246018	-0.00808875	0.0203663	0.00389671	0.0160184	-0.055189	0.0139202	0.00877013	0.0362831
-4.98528	-0.0689329	-0.028887	0.134877	0.117207	-0.011004	-0.0943465	-0.030319	0.0600506	-0.0946995	-0.0498428	-0.070565	0.0107882	-0.0521277	-0.0246014	-0.00806242	0.0203528	0.00388412	0.0160272	-0.0551758	0.0139261	0.00878138	0.036302
-4.9848	-0.0689462	-0.0288791	0.13491	0.117226	-0.0109739	-0.0943667	-0.0303045	0.06005	-0.0946906	-0.0498089	-0.0705161	0.0107654	-0.0521181	-0.024601	-0.0080361	0.0203394	0.00387153	0.016036	-0.0551626	0.013932	0.00879264	0.0363209
-4.98432	-0.0689596	-0.0288711	0.134942	0.117245	-0.0109437	-0.0943869	-0.0302901	0.0600493	-0.0946816	-0.0497749	-0.0704672	0.0107426	-0.0521084	-0.0246007	-0.0080098	0.0203259	0.00385894	0.0160448	-0.0551494	0.0139379	0.00880389	0.0363398
-4.98384	-0.0689729	-0.0288632	0.134974	0.117263	-0.0109135	-0.0944073	-0.0302756	0.0600486	-0.0946727	-0.049741	-0.0704183	0.0107197	-0.0520987	-0.0246003	-0.00798351	0.0203125	0.00384637	0.0160535	-0.0551361	0.0139439	0.00881513	0.0363586
-4.98336	-0.0689863	-0.0288552	0.135007	0.117282	-0.0108833	-0.0944276	-0.0302611	0.0600479	-0.0946636	-0.0497071	-0.0703693	0.0106969	-0.0520891	-0.0246	-0.00795721	0.020299	0.0038338	0.0160623	-0.0551229	0.0139498	0.00882637	0.0363774
-4.98288	-0.0689996	-0.0288472	0.135039	0.1173	-0.0108531	-0.0944481	-0.0302466	0.0600473	-0.0946546	-0.0496732	-0.0703203	0.0106741	-0.0520794	-0.0245997	-0.00793095	0.0202856	0.00382124	0.0160711	-0.0551097	0.0139557	0.0088376	0.0363963
-4.9824	-0.069013	-0.0288391	0.135071	0.117319	-0.0108228	-0.0944686	-0.0302321	0.0600466	-0.0946456	-0.0496392	-0.0702714	0.0106513	-0.0520697	-0.0245993	-0.0079047	0.0202721	0.00380869	0.0160798	-0.0550964	0.0139617	0.00884884	0.0364151
-4.98192	-0.0690264	-0.0288311	0.135104	0.117337	-0.0107926	-0.0944892	-0.0302176	0.0600459	-0.0946364	-0.0496053	-0.0702224	0.0106286	-0.05206	-0.024599	-0.00787847	0.0202586	0.00379614	0.0160886	-0.0550832	0.0139676	0.00886009	0.0364339
-4.98144	-0.0690398	-0.028823	0.135136	0.117356	-0.0107623	-0.0945099	-0.0302031	0.0600453	-0.0946273	-0.0495714	-0.0701734	0.0106058	-0.0520503	-0.0245987	-0.00785224	0.0202451	0.00378361	0.0160973	-0.0550699	0.0139736	0.00887131	0.0364527
-4.98096	-0.0690532	-0.0288149	0.135168	0.117374	-0.010732	-0.0945306	-0.0301886	0.0600446	-0.0946181	-0.0495374	-0.0701244	0.010583	-0.0520406	-0.0245983	-0.00782603	0.0202317	0.00377108	0.0161061	-0.0550567	0.0139795	0.00888254	0.0364715
-4.98048	-0.0690666	-0.0288068	0.1352	0.117392	-0.0107018	-0.0945514	-0.0301741	0.060044	-0.0946089	-0.0495035	-0.0700754	0.0105602	-0.0520309	-0.024598	-0.00779984	0.0202182	0.00375856	0.0161148	-0.0550434	0.0139855	0.00889377	0.0364903
-4.98	-0.06908	-0.0287987	0.135232	0.11741	-0.0106715	-0.0945723	-0.0301596	0.0600434	-0.0945997	-0.0494695	-0.0700263	0.0105375	-0.0520212	-0.0245977	-0.00777368	0.0202047	0.00374605	0.0161236	-0.0550301	0.0139914	0.00890499	0.0365091
-4.97952	-0.0690935	-0.0287905	0.135264	0.117428	-0.0106412	-0.0945932	-0.0301451	0.0600428	-0.0945904	-0.0494356	-0.0699773	0.0105147	-0.0520114	-0.0245975	-0.00774752	0.0201912	0.00373356	0.0161323	-0.0550168	0.0139974	0.00891621	0.0365278
-4.97904	-0.069107	-0.0287824	0.135296	0.117446	-0.0106108	-0.0946142	-0.0301306	0.0600421	-0.0945811	-0.0494016	-0.0699282	0.0104919	-0.0520017	-0.0245972	-0.00772138	0.0201777	0.00372107	0.016141	-0.0550035	0.0140034	0.00892742	0.0365466
-4.97856	-0.0691206	-0.0287742	0.135329	0.117464	-0.0105805	-0.0946353	-0.0301161	0.0600415	-0.0945717	-0.0493676	-0.0698792	0.0104692	-0.051992	-0.0245969	-0.00769525	0.0201642	0.00370858	0.0161498	-0.0549903	0.0140093	0.00893864	0.0365653
-4.97808	-0.0691343	-0.028766	0.135361	0.117482	-0.0105502	-0.0946564	-0.0301015	0.0600409	-0.0945623	-0.0493337	-0.0698301	0.0104464	-0.0519822	-0.0245966	-0.00766915	0.0201507	0.0036961	0.0161585	-0.054977	0.0140153	0.00894984	0.0365841
-4.9776	-0.0691479	-0.0287578	0.135393	0.1175	-0.0105198	-0.0946776	-0.030087	0.0600403	-0.0945529	-0.0492997	-0.069781	0.0104236	-0.0519724	-0.0245964	-0.00764304	0.0201372	0.00368364	0.0161672	-0.0549636	0.0140213	0.00896106	0.0366028
-4.97712	-0.0691616	-0.0287496	0.135425	0.117517	-0.0104894	-0.0946989	-0.0300724	0.0600397	-0.0945435	-0.0492657	-0.0697319	0.0104009	-0.0519627	-0.0245961	-0.00761697	0.0201237	0.00367119	0.0161759	-0.0549503	0.0140273	0.00897226	0.0366215
-4.97664	-0.0691754	-0.0287413	0.135457	0.117535	-0.0104591	-0.0947202	-0.0300579	0.0600392	-0.094534	-0.0492317	-0.0696828	0.0103781	-0.0519529	-0.0245958	-0.00759089	0.0201102	0.00365874	0.0161846	-0.054937	0.0140333	0.00898346	0.0366403
-4.97616	-0.0691893	-0.028733	0.135488	0.117553	-0.0104287	-0.0947416	-0.0300433	0.0600386	-0.0945245	-0.0491977	-0.0696337	0.0103554	-0.0519432	-0.0245955	-0.00756484	0.0200967	0.0036463	0.0161933	-0.0549237	0.0140393	0.00899463	0.036659
-4.97568	-0.0692032	-0.0287248	0.13552	0.11757	-0.0103983	-0.0947631	-0.0300287	0.060038	-0.094515	-0.0491636	-0.0695846	0.0103326	-0.0519334	-0.0245953	-0.00753881	0.0200832	0.00363387	0.016202	-0.0549104	0.0140453	0.00900584	0.0366777
-4.9752	-0.0692172	-0.0287164	0.135552	0.117588	-0.0103679	-0.0947847	-0.0300141	0.0600375	-0.0945054	-0.0491296	-0.0695354	0.0103099	-0.0519236	-0.024595	-0.00751277	0.0200697	0.00362145	0.0162107	-0.0548971	0.0140513	0.00901701	0.0366963
-4.97472	-0.0692315	-0.0287081	0.135584	0.117605	-0.0103374	-0.0948063	-0.0299996	0.0600369	-0.0944958	-0.0490956	-0.0694863	0.0102872	-0.0519138	-0.0245947	-0.00748677	0.0200562	0.00360903	0.0162194	-0.0548838	0.0140573	0.00902819	0.036715
-4.97424	-0.0692457	-0.0286998	0.135616	0.117622	-0.010307	-0.094828	-0.029985	0.0600364	-0.0944862	-0.0490616	-0.0694372	0.0102644	-0.051904	-0.0245944	-0.00746078	0.0200427	0.00359663	0.0162281	-0.0548704	0.0140634	0.00903937	0.0367337
-4.97376	-0.0692601	-0.0286914	0.135648	0.117639	-0.0102765	-0.0948498	-0.0299704	0.0600358	-0.0944766	-0.0490275	-0.069388	0.0102417	-0.0518942	-0.0245941	-0.00743482	0.0200292	0.00358424	0.0162367	-0.0548571	0.0140694	0.00905053	0.0367523
-4.97328	-0.0692744	-0.028683	0.13568	0.117657	-0.0102461	-0.0948717	-0.0299558	0.0600353	-0.0944669	-0.0489934	-0.0693389	0.010219	-0.0518844	-0.0245938	-0.00740886	0.0200157	0.00357185	0.0162454	-0.0548437	0.0140755	0.0090617	0.0367709
-4.9728	-0.0692888	-0.0286746	0.135711	0.117674	-0.0102156	-0.0948936	-0.0299412	0.0600348	-0.0944573	-0.0489594	-0.0692897	0.0101962	-0.0518746	-0.0245935	-0.00738293	0.0200023	0.00355948	0.0162541	-0.0548304	0.0140815	0.00907285	0.0367896
-4.97232	-0.0693032	-0.0286661	0.135743	0.117691	-0.0101851	-0.0949157	-0.0299266	0.0600343	-0.0944475	-0.0489253	-0.0692406	0.0101735	-0.0518648	-0.0245932	-0.00735701	0.0199888	0.00354711	0.0162627	-0.0548171	0.0140876	0.00908399	0.0368082
-4.97184	-0.0693176	-0.0286577	0.135775	0.117707	-0.0101546	-0.0949378	-0.029912	0.0600337	-0.0944378	-0.0488912	-0.0691914	0.0101508	-0.051855	-0.0245929	-0.00733112	0.0199753	0.00353475	0.0162714	-0.0548037	0.0140936	0.00909516	0.0368268
-4.97136	-0.069332	-0.0286492	0.135807	0.117724	-0.0101241	-0.09496	-0.0298974	0.0600333	-0.094428	-0.0488572	-0.0691422	0.0101281	-0.0518452	-0.0245925	-0.00730523	0.0199619	0.00352239	0.01628	-0.0547904	0.0140997	0.00910628	0.0368454
-4.97088	-0.0693465	-0.0286408	0.135838	0.117741	-0.0100935	-0.0949822	-0.0298828	0.0600328	-0.0944182	-0.0488231	-0.0690931	0.0101054	-0.0518353	-0.0245922	-0.00727937	0.0199484	0.00351005	0.0162887	-0.0547771	0.0141058	0.00911742	0.0368639
-4.9704	-0.0693609	-0.0286323	0.13587	0.117758	-0.010063	-0.0950047	-0.0298682	0.0600323	-0.0944083	-0.048789	-0.0690439	0.0100827	-0.0518255	-0.0245918	-0.00725351	0.019935	0.00349773	0.0162973	-0.0547637	0.0141119	0.00912855	0.0368825
-4.96992	-0.0693754	-0.0286238	0.135902	0.117774	-0.0100324	-0.0950271	-0.0298537	0.0600318	-0.0943984	-0.0487549	-0.0689946	0.01006	-0.0518156	-0.0245915	-0.00722769	0.0199215	0.00348541	0.0163059	-0.0547504	0.014118	0.00913968	0.0369011
-4.96944	-0.0693898	-0.0286152	0.135933	0.117791	-0.0100018	-0.0950497	-0.0298391	0.0600314	-0.0943885	-0.0487208	-0.0689454	0.0100373	-0.0518058	-0.0245911	-0.00720188	0.0199081	0.0034731	0.0163145	-0.054737	0.0141241	0.00915079	0.0369196
-4.96896	-0.0694043	-0.0286067	0.135965	0.117807	-0.00997121	-0.0950723	-0.0298245	0.0600309	-0.0943786	-0.0486867	-0.0688962	0.0100146	-0.0517959	-0.0245907	-0.00717609	0.0198946	0.0034608	0.0163232	-0.0547236	0.0141302	0.00916188	0.0369381
-4.96848	-0.0694188	-0.0285981	0.135996	0.117824	-0.00994059	-0.0950949	-0.0298099	0.0600305	-0.0943686	-0.0486526	-0.068847	0.00999197	-0.0517861	-0.0245903	-0.00715032	0.0198812	0.00344851	0.0163318	-0.0547103	0.0141363	0.00917299	0.0369567
-4.968	-0.0694334	-0.0285896	0.136028	0.11784	-0.00990997	-0.0951177	-0.0297954	0.06003	-0.0943586	-0.0486185	-0.0687977	0.00996927	-0.0517762	-0.0245899	-0.00712455	0.0198677	0.00343624	0.0163404	-0.0546969	0.0141424	0.00918408	0.0369752
-4.96752	-0.0694481	-0.028581	0.136059	0.117856	-0.00987933	-0.0951404	-0.0297808	0.0600296	-0.0943485	-0.0485844	-0.0687485	0.00994656	-0.0517664	-0.0245894	-0.00709882	0.0198543	0.00342397	0.0163489	-0.0546835	0.0141485	0.00919515	0.0369937
-4.96704	-0.0694628	-0.0285724	0.136091	0.117873	-0.00984866	-0.0951633	-0.0297663	0.0600292	-0.0943385	-0.0485503	-0.0686992	0.00992384	-0.0517565	-0.024589	-0.00707309	0.0198408	0.00341172	0.0163575	-0.0546701	0.0141546	0.00920624	0.0370121
-4.96656	-0.0694775	-0.0285638	0.136122	0.117889	-0.009818	-0.0951863	-0.0297518	0.0600288	-0.0943284	-0.0485162	-0.06865	0.00990113	-0.0517467	-0.0245886	-0.00704737	0.0198274	0.00339947	0.0163661	-0.0546567	0.0141608	0.0092173	0.0370306
-4.96608	-0.0694923	-0.0285552	0.136154	0.117905	-0.00978731	-0.0952093	-0.0297373	0.0600284	-0.0943182	-0.048482	-0.0686007	0.00987839	-0.0517368	-0.0245881	-0.00702166	0.019814	0.00338724	0.0163747	-0.0546433	0.0141669	0.00922838	0.0370491
-4.9656	-0.0695071	-0.0285465	0.136185	0.117921	-0.00975662	-0.0952324	-0.0297228	0.060028	-0.094308	-0.0484479	-0.0685515	0.00985567	-0.0517269	-0.0245876	-0.00699596	0.0198005	0.00337503	0.0163832	-0.0546299	0.014173	0.00923941	0.0370675
-4.96512	-0.0695219	-0.0285379	0.136217	0.117937	-0.00972591	-0.0952557	-0.0297082	0.0600276	-0.0942978	-0.0484138	-0.0685022	0.00983294	-0.051717	-0.0245872	-0.00697028	0.0197871	0.00336283	0.0163918	-0.0546164	0.0141792	0.00925047	0.037086
-4.96464	-0.0695368	-0.0285292	0.136248	0.117952	-0.00969519	-0.095279	-0.0296937	0.0600273	-0.0942875	-0.0483797	-0.0684529	0.00981023	-0.0517072	-0.0245867	-0.00694461	0.0197737	0.00335065	0.0164003	-0.054603	0.0141853	0.00926149	0.0371044
-4.96416	-0.0695519	-0.0285205	0.136279	0.117968	-0.00966445	-0.0953024	-0.0296792	0.0600269	-0.0942772	-0.0483456	-0.0684036	0.00978747	-0.0516973	-0.0245863	-0.00691895	0.0197603	0.00333847	0.0164088	-0.0545896	0.0141915	0.00927251	0.0371228
-4.96368	-0.069567	-0.0285118	0.136311	0.117984	-0.0096337	-0.0953259	-0.0296648	0.0600266	-0.0942669	-0.0483114	-0.0683543	0.00976475	-0.0516874	-0.0245858	-0.00689332	0.0197469	0.00332631	0.0164174	-0.0545761	0.0141976	0.00928352	0.0371412
-4.9632	-0.0695821	-0.0285031	0.136342	0.117999	-0.00960292	-0.0953495	-0.0296503	0.0600263	-0.0942565	-0.0482772	-0.068305	0.009742	-0.0516776	-0.0245853	-0.00686768	0.0197336	0.00331416	0.0164259	-0.0545627	0.0142038	0.00929454	0.0371596
-4.96272	-0.0695973	-0.0284944	0.136373	0.118015	-0.00957213	-0.0953733	-0.0296358	0.0600259	-0.0942461	-0.0482431	-0.0682557	0.00971928	-0.0516677	-0.0245848	-0.00684207	0.0197202	0.00330202	0.0164344	-0.0545492	0.01421	0.00930553	0.037178
-4.96224	-0.0696125	-0.0284856	0.136405	0.11803	-0.00954133	-0.095397	-0.0296214	0.0600256	-0.0942357	-0.0482089	-0.0682064	0.00969655	-0.0516578	-0.0245843	-0.00681646	0.0197068	0.00328989	0.0164429	-0.0545357	0.0142161	0.00931652	0.0371964
-4.96176	-0.0696277	-0.0284768	0.136436	0.118046	-0.00951051	-0.0954209	-0.029607	0.0600253	-0.0942252	-0.0481748	-0.0681571	0.00967384	-0.051648	-0.0245839	-0.00679088	0.0196935	0.00327778	0.0164514	-0.0545223	0.0142223	0.00932749	0.0372147
-4.96128	-0.069643	-0.028468	0.136467	0.118061	-0.00947967	-0.0954449	-0.0295925	0.0600251	-0.0942147	-0.0481406	-0.0681077	0.00965113	-0.0516381	-0.0245834	-0.00676531	0.0196801	0.00326568	0.0164599	-0.0545088	0.0142284	0.00933848	0.0372331
-4.9608	-0.0696582	-0.0284592	0.136498	0.118076	-0.00944882	-0.0954689	-0.0295781	0.0600248	-0.0942041	-0.0481064	-0.0680584	0.00962844	-0.0516282	-0.0245829	-0.00673975	0.0196667	0.00325359	0.0164683	-0.0544953	0.0142346	0.00934943	0.0372514
-4.96032	-0.0696735	-0.0284503	0.136529	0.118091	-0.00941794	-0.095493	-0.0295637	0.0600245	-0.0941935	-0.0480722	-0.0680091	0.00960575	-0.0516183	-0.0245825	-0.00671419	0.0196534	0.00324152	0.0164768	-0.0544818	0.0142408	0.00936039	0.0372698
-4.95984	-0.0696888	-0.0284414	0.13656	0.118107	-0.00938704	-0.0955172	-0.0295493	0.0600243	-0.0941829	-0.048038	-0.0679597	0.00958306	-0.0516084	-0.024582	-0.00668866	0.01964	0.00322946	0.0164852	-0.0544683	0.014247	0.00937132	0.0372881
-4.95936	-0.0697041	-0.0284325	0.136592	0.118122	-0.00935614	-0.0955415	-0.0295349	0.060024	-0.0941723	-0.0480038	-0.0679104	0.00956037	-0.0515986	-0.0245815	-0.00666312	0.0196267	0.00321741	0.0164937	-0.0544548	0.0142532	0.00938226	0.0373064
-4.95888	-0.0697193	-0.0284236	0.136623	0.118137	-0.0093252	-0.095566	-0.0295206	0.0600238	-0.0941616	-0.0479696	-0.067861	0.0095377	-0.0515887	-0.024581	-0.00663761	0.0196133	0.00320537	0.0165021	-0.0544413	0.0142594	0.00939318	0.0373247
-4.9584	-0.0697345	-0.0284146	0.136654	0.118151	-0.00929425	-0.0955905	-0.0295062	0.0600236	-0.0941509	-0.0479354	-0.0678116	0.00951502	-0.0515788	-0.0245805	-0.0066121	0.0196	0.00319334	0.0165105	-0.0544278	0.0142656	0.0094041	0.037343
-4.95792	-0.0697496	-0.0284056	0.136685	0.118166	-0.00926329	-0.0956151	-0.0294919	0.0600234	-0.0941401	-0.0479012	-0.0677623	0.00949235	-0.0515689	-0.02458	-0.0065866	0.0195866	0.00318133	0.0165189	-0.0544142	0.0142718	0.00941501	0.0373613
-4.95744	-0.0697647	-0.0283966	0.136716	0.118181	-0.0092323	-0.0956399	-0.0294775	0.0600232	-0.0941293	-0.047867	-0.0677129	0.00946967	-0.0515591	-0.0245795	-0.00656112	0.0195733	0.00316932	0.0165273	-0.0544007	0.014278	0.0094259	0.0373795
-4.95696	-0.0697798	-0.0283876	0.136747	0.118196	-0.00920129	-0.0956647	-0.0294632	0.0600231	-0.0941185	-0.0478327	-0.0676635	0.00944702	-0.0515492	-0.0245791	-0.00653566	0.0195599	0.00315733	0.0165357	-0.0543872	0.0142842	0.00943678	0.0373978
-4.95648	-0.069795	-0.0283785	0.136778	0.11821	-0.00917027	-0.0956897	-0.0294489	0.0600229	-0.0941077	-0.0477985	-0.0676141	0.00942436	-0.0515393	-0.0245786	-0.00651019	0.0195465	0.00314534	0.0165441	-0.0543736	0.0142905	0.00944766	0.037416
-4.956	-0.0698102	-0.0283694	0.136809	0.118225	-0.00913923	-0.0957147	-0.0294346	0.0600227	-0.0940968	-0.0477643	-0.0675647	0.00940174	-0.0515294	-0.0245781	-0.00648476	0.0195332	0.00313338	0.0165525	-0.0543601	0.0142967	0.00945852	0.0374343
-4.95552	-0.0698253	-0.0283602	0.13684	0.11824	-0.00910816	-0.0957399	-0.0294203	0.0600226	-0.0940859	-0.04773	-0.0675152	0.00937912	-0.0515195	-0.0245776	-0.00645933	0.0195198	0.00312141	0.0165608	-0.0543465	0.014303	0.00946939	0.0374525
-4.95504	-0.0698406	-0.0283511	0.13687	0.118254	-0.00907707	-0.0957652	-0.029406	0.0600225	-0.094075	-0.0476958	-0.0674658	0.00935653	-0.0515097	-0.024577	-0.00643392	0.0195065	0.00310947	0.0165692	-0.0543329	0.0143092	0.0094802	0.0374707
-4.95456	-0.0698558	-0.0283419	0.136901	0.118269	-0.00904597	-0.0957905	-0.0293917	0.0600224	-0.094064	-0.0476615	-0.0674164	0.00933392	-0.0514998	-0.0245765	-0.00640851	0.0194931	0.00309753	0.0165775	-0.0543194	0.0143155	0.00949105	0.0374889
-4.95408	-0.069871	-0.0283327	0.136932	0.118283	-0.00901484	-0.095816	-0.0293774	0.0600222	-0.094053	-0.0476272	-0.0673669	0.00931137	-0.0514899	-0.0245759	-0.00638313	0.0194798	0.00308561	0.0165858	-0.0543058	0.0143217	0.00950187	0.037507
-4.9536	-0.0698863	-0.0283235	0.136963	0.118297	-0.0089837	-0.0958415	-0.0293631	0.0600222	-0.094042	-0.0475929	-0.0673175	0.00928879	-0.05148	-0.0245753	-0.00635777	0.0194664	0.0030737	0.0165941	-0.0542922	0.014328	0.00951267	0.0375252
-4.95312	-0.0699016	-0.0283142	0.136994	0.118312	-0.00895255	-0.0958672	-0.0293488	0.0600221	-0.094031	-0.0475587	-0.067268	0.00926629	-0.0514701	-0.0245747	-0.00633241	0.0194531	0.00306181	0.0166024	-0.0542786	0.0143343	0.00952346	0.0375434
-4.95264	-0.0699169	-0.0283049	0.137024	0.118326	-0.00892137	-0.0958929	-0.0293346	0.060022	-0.0940199	-0.0475244	-0.0672185	0.00924375	-0.0514603	-0.0245741	-0.00630706	0.0194397	0.00304993	0.0166107	-0.0542651	0.0143406	0.00953427	0.0375615
-4.95216	-0.0699322	-0.0282956	0.137055	0.11834	-0.00889016	-0.0959187	-0.0293203	0.060022	-0.0940088	-0.0474901	-0.067169	0.00922126	-0.0514504	-0.0245734	-0.00628174	0.0194264	0.00303806	0.016619	-0.0542515	0.0143469	0.00954503	0.0375797
-4.95168	-0.0699475	-0.0282863	0.137086	0.118354	-0.00885895	-0.0959446	-0.0293061	0.0600219	-0.0939976	-0.0474558	-0.0671196	0.00919876	-0.0514405	-0.0245728	-0.00625642	0.019413	0.00302621	0.0166273	-0.0542379	0.0143532	0.0095558	0.0375978
-4.9512	-0.0699629	-0.028277	0.137117	0.118369	-0.0088277	-0.0959707	-0.0292919	0.0600219	-0.0939865	-0.0474215	-0.0670701	0.00917628	-0.0514306	-0.0245721	-0.00623112	0.0193997	0.00301436	0.0166356	-0.0542243	0.0143595	0.00956654	0.0376159
-4.95072	-0.0699783	-0.0282676	0.137147	0.118383	-0.00879645	-0.0959968	-0.0292776	0.0600219	-0.0939753	-0.0473872	-0.0670207	0.00915381	-0.0514207	-0.0245715	-0.00620583	0.0193863	0.00300253	0.0166438	-0.0542107	0.0143658	0.00957729	0.037634
-4.95024	-0.0699939	-0.0282582	0.137178	0.118397	-0.00876519	-0.096023	-0.0292634	0.0600219	-0.0939641	-0.0473529	-0.0669712	0.00913137	-0.0514109	-0.0245708	-0.00618055	0.019373	0.00299072	0.0166521	-0.0541971	0.0143721	0.00958804	0.0376521
-4.94976	-0.0700095	-0.0282488	0.137209	0.118411	-0.00873389	-0.0960494	-0.0292492	0.0600219	-0.0939528	-0.0473186	-0.0669218	0.00910894	-0.051401	-0.02457	-0.00615528	0.0193597	0.00297892	0.0166604	-0.0541835	0.0143784	0.00959874	0.0376702
-4.94928	-0.0700252	-0.0282394	0.137239	0.118425	-0.00870258	-0.0960759	-0.029235	0.060022	-0.0939415	-0.0472843	-0.0668724	0.00908655	-0.0513911	-0.0245693	-0.00613001	0.0193463	0.00296713	0.0166686	-0.0541699	0.0143848	0.00960945	0.0376883
-4.9488	-0.0700409	-0.0282299	0.13727	0.118439	-0.00867126	-0.0961025	-0.0292208	0.060022	-0.0939302	-0.0472499	-0.0668229	0.00906415	-0.0513812	-0.0245685	-0.00610476	0.019333	0.00295535	0.0166768	-0.0541563	0.0143911	0.00962015	0.0377063
-4.94832	-0.0700565	-0.0282205	0.1373	0.118453	-0.0086399	-0.0961291	-0.0292066	0.0600221	-0.0939189	-0.0472156	-0.0667735	0.00904178	-0.0513713	-0.0245678	-0.00607952	0.0193197	0.00294358	0.0166851	-0.0541427	0.0143974	0.00963084	0.0377244
-4.94784	-0.0700723	-0.028211	0.137331	0.118467	-0.00860853	-0.0961559	-0.0291925	0.0600221	-0.0939075	-0.0471812	-0.0667241	0.00901942	-0.0513614	-0.024567	-0.00605428	0.0193064	0.00293183	0.0166933	-0.0541291	0.0144038	0.00964153	0.0377424
-4.94736	-0.070088	-0.0282015	0.137361	0.118481	-0.00857714	-0.0961828	-0.0291783	0.0600222	-0.0938961	-0.0471469	-0.0666747	0.00899709	-0.0513515	-0.0245662	-0.00602906	0.019293	0.00292009	0.0167015	-0.0541155	0.0144101	0.00965218	0.0377605
-4.94688	-0.0701037	-0.028192	0.137392	0.118495	-0.00854573	-0.0962099	-0.0291642	0.0600223	-0.0938846	-0.0471125	-0.0666254	0.00897475	-0.0513416	-0.0245654	-0.00600385	0.0192797	0.00290837	0.0167097	-0.0541018	0.0144165	0.00966284	0.0377785
-4.9464	-0.0701195	-0.0281825	0.137422	0.118509	-0.00851429	-0.096237	-0.0291501	0.0600224	-0.0938731	-0.0470781	-0.066576	0.00895241	-0.0513318	-0.0245646	-0.00597865	0.0192664	0.00289665	0.0167178	-0.0540882	0.0144229	0.00967347	0.0377965
-4.94592	-0.0701353	-0.0281729	0.137453	0.118522	-0.00848284	-0.0962643	-0.0291359	0.0600226	-0.0938617	-0.0470437	-0.0665267	0.00893011	-0.0513219	-0.0245637	-0.00595345	0.0192531	0.00288495	0.016726	-0.0540746	0.0144293	0.0096841	0.0378145
-4.94544	-0.0701511	-0.0281634	0.137483	0.118536	-0.00845137	-0.0962917	-0.0291218	0.0600227	-0.0938501	-0.0470094	-0.0664773	0.00890781	-0.051312	-0.0245629	-0.00592827	0.0192398	0.00287325	0.0167342	-0.054061	0.0144356	0.00969471	0.0378324
-4.94496	-0.0701669	-0.0281538	0.137513	0.11855	-0.00841988	-0.0963192	-0.0291078	0.0600228	-0.0938385	-0.046975	-0.066428	0.00888556	-0.0513021	-0.024562	-0.0059031	0.0192265	0.00286158	0.0167423	-0.0540473	0.014442	0.00970531	0.0378504
-4.94448	-0.0701827	-0.0281442	0.137544	0.118564	-0.00838836	-0.0963468	-0.0290937	0.060023	-0.0938269	-0.0469406	-0.0663787	0.0088633	-0.0512922	-0.0245611	-0.00587793	0.0192132	0.00284992	0.0167505	-0.0540337	0.0144484	0.00971589	0.0378683
-4.944	-0.0701986	-0.0281346	0.137574	0.118577	-0.00835684	-0.0963744	-0.0290796	0.0600232	-0.0938153	-0.0469062	-0.0663294	0.00884108	-0.0512823	-0.0245602	-0.00585279	0.0192	0.00283827	0.0167586	-0.0540201	0.0144547	0.00972647	0.0378863
-4.94352	-0.0702145	-0.0281249	0.137604	0.118591	-0.00832528	-0.0964022	-0.0290656	0.0600233	-0.0938036	-0.0468718	-0.0662801	0.00881887	-0.0512724	-0.0245593	-0.00582763	0.0191867	0.00282664	0.0167667	-0.0540064	0.0144611	0.00973702	0.0379042
-4.94304	-0.0702304	-0.0281153	0.137635	0.118605	-0.00829371	-0.09643	-0.0290516	0.0600235	-0.0937919	-0.0468374	-0.0662308	0.0087967	-0.0512625	-0.0245583	-0.00580252	0.0191734	0.00281502	0.0167748	-0.0539928	0.0144675	0.00974758	0.0379221
-4.94256	-0.0702463	-0.0281056	0.137665	0.118618	-0.00826211	-0.0964579	-0.0290376	0.0600237	-0.0937802	-0.046803	-0.0661816	0.00877453	-0.0512526	-0.0245574	-0.00577739	0.0191601	0.00280341	0.0167829	-0.0539792	0.0144739	0.0097581	0.03794
-4.94208	-0.0702622	-0.0280959	0.137695	0.118632	-0.00823049	-0.0964859	-0.0290235	0.0600239	-0.0937684	-0.0467685	-0.0661323	0.0087524	-0.0512426	-0.0245564	-0.00575229	0.0191469	0.00279182	0.016791	-0.0539655	0.0144802	0.00976863	0.0379579
-4.9416	-0.0702782	-0.0280862	0.137725	0.118646	-0.00819885	-0.0965139	-0.0290096	0.0600242	-0.0937566	-0.0467341	-0.0660831	0.00873028	-0.0512327	-0.0245554	-0.00572717	0.0191336	0.00278023	0.0167991	-0.0539519	0.0144866	0.00977912	0.0379758
-4.94112	-0.0702942	-0.0280765	0.137755	0.118659	-0.00816719	-0.0965421	-0.0289956	0.0600244	-0.0937448	-0.0466996	-0.0660338	0.00870818	-0.0512228	-0.0245544	-0.00570209	0.0191203	0.00276866	0.0168072	-0.0539383	0.014493	0.00978962	0.0379936
-4.94064	-0.0703102	-0.0280667	0.137786	0.118673	-0.00813552	-0.0965703	-0.0289816	0.0600247	-0.0937329	-0.0466652	-0.0659846	0.0086861	-0.0512129	-0.0245535	-0.00567701	0.0191071	0.0027571	0.0168152	-0.0539246	0.0144993	0.0098001	0.0380115
-4.94016	-0.0703263	-0.028057	0.137816	0.118686	-0.00810382	-0.0965987	-0.0289677	0.0600249	-0.093721	-0.0466307	-0.0659354	0.00866402	-0.0512029	-0.0245525	-0.00565194	0.0190939	0.00274556	0.0168233	-0.0539109	0.0145057	0.00981057	0.0380293
-4.93968	-0.0703423	-0.0280472	0.137846	0.1187	-0.00807209	-0.0966271	-0.0289538	0.0600252	-0.093709	-0.0465963	-0.0658862	0.00864199	-0.051193	-0.0245514	-0.00562688	0.0190806	0.00273404	0.0168313	-0.0538973	0.0145121	0.00982099	0.0380472
-4.9392	-0.0703584	-0.0280374	0.137876	0.118713	-0.00804036	-0.0966555	-0.0289399	0.0600255	-0.093697	-0.0465618	-0.0658369	0.00861994	-0.051183	-0.0245504	-0.00560183	0.0190674	0.00272252	0.0168393	-0.0538836	0.0145185	0.00983144	0.038065
-4.93872	-0.0703745	-0.0280275	0.137906	0.118726	-0.00800859	-0.0966841	-0.028926	0.0600257	-0.093685	-0.0465273	-0.0657877	0.00859795	-0.0511731	-0.0245493	-0.00557679	0.0190542	0.00271102	0.0168474	-0.0538699	0.0145248	0.00984185	0.0380828
-4.93824	-0.0703906	-0.0280177	0.137936	0.11874	-0.00797681	-0.0967127	-0.0289121	0.0600261	-0.0936729	-0.0464929	-0.0657385	0.00857596	-0.0511631	-0.0245483	-0.00555177	0.019041	0.00269953	0.0168554	-0.0538562	0.0145312	0.00985228	0.0381006
-4.93776	-0.0704067	-0.0280078	0.137966	0.118753	-0.007945	-0.0967415	-0.0288983	0.0600264	-0.0936608	-0.0464584	-0.0656892	0.008554	-0.0511531	-0.0245472	-0.00552675	0.0190278	0.00268805	0.0168634	-0.0538426	0.0145376	0.00986265	0.0381184
-4.93728	-0.0704228	-0.027998	0.137996	0.118766	-0.00791317	-0.0967703	-0.0288844	0.0600267	-0.0936487	-0.0464239	-0.06564	0.00853204	-0.0511432	-0.0245461	-0.00550175	0.0190146	0.00267659	0.0168714	-0.0538289	0.014544	0.00987304	0.0381361
-4.9368	-0.070439	-0.0279881	0.138026	0.118779	-0.00788132	-0.0967992	-0.0288706	0.060027	-0.0936365	-0.0463894	-0.0655907	0.00851012	-0.0511332	-0.024545	-0.00547676	0.0190015	0.00266513	0.0168794	-0.0538152	0.0145504	0.00988339	0.0381539
-4.93632	-0.0704552	-0.0279782	0.138056	0.118793	-0.00784945	-0.0968282	-0.0288568	0.0600274	-0.0936243	-0.0463548	-0.0655415	0.00848822	-0.0511232	-0.0245439	-0.0054518	0.0189883	0.00265369	0.0168873	-0.0538014	0.0145567	0.00989375	0.0381716
-4.93584	-0.0704714	-0.0279683	0.138086	0.118806	-0.00781756	-0.0968573	-0.028843	0.0600277	-0.093612	-0.0463203	-0.0654922	0.00846633	-0.0511133	-0.0245428	-0.00542683	0.0189752	0.00264226	0.0168953	-0.0537877	0.0145631	0.00990407	0.0381894
-4.93536	-0.0704877	-0.0279583	0.138116	0.118819	-0.00778565	-0.0968865	-0.0288293	0.0600281	-0.0935997	-0.0462858	-0.0654429	0.00844447	-0.0511033	-0.0245417	-0.00540188	0.018962	0.00263083	0.0169033	-0.053774	0.0145695	0.00991439	0.0382071
-4.93488	-0.070504	-0.0279484	0.138146	0.118832	-0.00775371	-0.0969158	-0.0288155	0.0600285	-0.0935873	-0.0462513	-0.0653936	0.00842262	-0.0510933	-0.0245405	-0.00537695	0.0189489	0.00261942	0.0169112	-0.0537603	0.0145759	0.00992468	0.0382248
-4.9344	-0.0705204	-0.0279385	0.138176	0.118845	-0.00772176	-0.0969451	-0.0288017	0.0600289	-0.093575	-0.0462167	-0.0653443	0.0084008	-0.0510834	-0.0245394	-0.00535202	0.0189358	0.00260803	0.0169191	-0.0537466	0.0145823	0.00993498	0.0382424
-4.93392	-0.070537	-0.0279285	0.138206	0.118858	-0.00768979	-0.0969746	-0.028788	0.0600293	-0.0935626	-0.0461822	-0.065295	0.00837899	-0.0510734	-0.0245382	-0.00532712	0.0189227	0.00259665	0.016927	-0.0537329	0.0145887	0.00994524	0.0382601
-4.93344	-0.0705536	-0.0279185	0.138236	0.118871	-0.00765779	-0.0970041	-0.0287743	0.0600297	-0.0935501	-0.0461476	-0.0652457	0.00835724	-0.0510634	-0.024537	-0.00530222	0.0189096	0.00258529	0.0169349	-0.0537191	0.014595	0.0099555	0.0382777
-4.93296	-0.0705703	-0.0279085	0.138265	0.118884	-0.00762577	-0.0970337	-0.0287606	0.0600301	-0.0935376	-0.0461131	-0.0651964	0.00833546	-0.0510535	-0.0245359	-0.00527735	0.0188965	0.00257393	0.0169428	-0.0537054	0.0146014	0.00996572	0.0382954
-4.93248	-0.0705869	-0.0278985	0.138295	0.118897	-0.00759373	-0.0970635	-0.0287469	0.0600306	-0.0935251	-0.0460785	-0.0651471	0.00831372	-0.0510435	-0.0245347	-0.00525247	0.0188834	0.00256259	0.0169507	-0.0536916	0.0146078	0.00997597	0.038313
-4.932	-0.0706036	-0.0278885	0.138325	0.118909	-0.00756168	-0.0970933	-0.0287332	0.060031	-0.0935125	-0.046044	-0.0650978	0.008292	-0.0510335	-0.0245335	-0.00522762	0.0188703	0.00255125	0.0169586	-0.0536779	0.0146142	0.00998615	0.0383306
-4.93152	-0.0706206	-0.0278784	0.138355	0.118922	-0.00752961	-0.0971232	-0.0287195	0.0600315	-0.0934999	-0.0460094	-0.0650486	0.0082703	-0.0510235	-0.0245323	-0.00520277	0.0188573	0.00253993	0.0169665	-0.0536641	0.0146205	0.00999636	0.0383481
-4.93104	-0.0706375	-0.0278683	0.138385	0.118935	-0.00749752	-0.0971532	-0.0287059	0.0600319	-0.0934873	-0.0459748	-0.0649992	0.00824859	-0.0510136	-0.024531	-0.00517794	0.0188442	0.00252861	0.0169743	-0.0536504	0.0146269	0.0100065	0.0383657
-4.93056	-0.0706547	-0.0278582	0.138414	0.118948	-0.0074654	-0.0971833	-0.0286923	0.0600324	-0.0934746	-0.0459402	-0.0649499	0.00822691	-0.0510036	-0.0245298	-0.00515311	0.0188311	0.00251731	0.0169822	-0.0536366	0.0146333	0.0100167	0.0383832
-4.93008	-0.0706719	-0.0278481	0.138444	0.11896	-0.00743326	-0.0972135	-0.0286786	0.0600329	-0.0934619	-0.0459057	-0.0649006	0.00820525	-0.0509936	-0.0245286	-0.00512831	0.0188181	0.00250603	0.01699	-0.0536229	0.0146396	0.0100268	0.0384008
-4.9296	-0.0706893	-0.027838	0.138474	0.118973	-0.00740113	-0.0972437	-0.028665	0.0600334	-0.0934491	-0.0458711	-0.0648512	0.0081836	-0.0509836	-0.0245273	-0.00510351	0.0188051	0.00249475	0.0169978	-0.0536091	0.014646	0.010037	0.0384183
-4.92912	-0.0707067	-0.0278279	0.138503	0.118985	-0.00736895	-0.0972741	-0.0286514	0.0600339	-0.0934364	-0.0458365	-0.0648019	0.00816196	-0.0509736	-0.0245261	-0.00507875	0.0187921	0.00248349	0.0170057	-0.0535954	0.0146524	0.0100471	0.0384358
-4.92864	-0.0707241	-0.0278177	0.138533	0.118998	-0.00733677	-0.0973045	-0.0286378	0.0600344	-0.0934235	-0.0458019	-0.0647526	0.00814034	-0.0509636	-0.0245248	-0.00505397	0.0187791	0.00247223	0.0170135	-0.0535816	0.0146587	0.0100572	0.0384532
-4.92816	-0.0707415	-0.0278076	0.138563	0.11901	-0.00730457	-0.097335	-0.0286242	0.0600349	-0.0934107	-0.0457673	-0.0647032	0.00811872	-0.0509535	-0.0245235	-0.00502923	0.0187661	0.00246099	0.0170213	-0.0535678	0.0146651	0.0100673	0.0384707
-4.92768	-0.070759	-0.0277974	0.138592	0.119023	-0.00727235	-0.0973656	-0.0286105	0.0600354	-0.0933978	-0.0457327	-0.0646539	0.00809712	-0.0509435	-0.0245222	-0.00500448	0.0187531	0.00244976	0.0170291	-0.0535541	0.0146714	0.0100774	0.0384881
-4.9272	-0.0707764	-0.0277872	0.138622	0.119035	-0.00724011	-0.0973964	-0.0285969	0.060036	-0.0933849	-0.0456981	-0.0646045	0.00807553	-0.0509335	-0.0245209	-0.00497978	0.0187401	0.00243854	0.0170369	-0.0535403	0.0146777	0.0100874	0.0385055
-4.92672	-0.0707939	-0.027777	0.138651	0.119047	-0.00720784	-0.0974272	-0.0285833	0.0600365	-0.0933719	-0.0456636	-0.0645552	0.00805397	-0.0509235	-0.0245196	-0.00495506	0.0187272	0.00242733	0.0170446	-0.0535266	0.0146841	0.0100975	0.0385229
-4.92624	-0.0708115	-0.0277668	0.138681	0.11906	-0.00717557	-0.0974581	-0.0285697	0.0600371	-0.0933589	-0.045629	-0.0645058	0.00803241	-0.0509135	-0.0245183	-0.00493037	0.0187142	0.00241613	0.0170524	-0.0535128	0.0146904	0.0101075	0.0385403
-4.92576	-0.070829	-0.0277566	0.138711	0.119072	-0.00714326	-0.0974891	-0.0285561	0.0600376	-0.0933459	-0.0455944	-0.0644564	0.00801088	-0.0509034	-0.0245169	-0.00490569	0.0187013	0.00240493	0.0170601	-0.0534991	0.0146967	0.0101175	0.0385577
-4.92528	-0.0708466	-0.0277463	0.13874	0.119084	-0.00711094	-0.0975202	-0.0285425	0.0600382	-0.0933328	-0.0455598	-0.0644071	0.00798937	-0.0508934	-0.0245156	-0.00488105	0.0186883	0.00239374	0.0170679	-0.0534853	0.014703	0.0101275	0.038575
-4.9248	-0.0708643	-0.027736	0.13877	0.119096	-0.00707862	-0.0975514	-0.0285289	0.0600388	-0.0933198	-0.0455252	-0.0643578	0.00796786	-0.0508833	-0.0245142	-0.00485639	0.0186754	0.00238256	0.0170756	-0.0534716	0.0147093	0.0101375	0.0385923
-4.92432	-0.0708822	-0.0277258	0.138799	0.119109	-0.00704626	-0.0975827	-0.0285153	0.0600393	-0.0933066	-0.0454906	-0.0643084	0.00794636	-0.0508733	-0.0245128	-0.00483176	0.0186625	0.0023714	0.0170833	-0.0534578	0.0147156	0.0101475	0.0386097
-4.92384	-0.0709	-0.0277155	0.138829	0.119121	-0.00701389	-0.0976141	-0.0285017	0.0600399	-0.0932935	-0.045456	-0.064259	0.00792489	-0.0508632	-0.0245115	-0.00480714	0.0186495	0.00236024	0.017091	-0.053444	0.0147219	0.0101575	0.038627
-4.92336	-0.070918	-0.0277052	0.138858	0.119133	-0.00698151	-0.0976456	-0.0284881	0.0600405	-0.0932803	-0.0454214	-0.0642097	0.00790343	-0.0508532	-0.0245101	-0.00478254	0.0186366	0.00234909	0.0170987	-0.0534303	0.0147282	0.0101674	0.0386442
-4.92288	-0.0709359	-0.0276949	0.138887	0.119145	-0.00694911	-0.0976772	-0.0284745	0.0600411	-0.0932671	-0.0453868	-0.0641603	0.00788197	-0.0508431	-0.0245087	-0.00475795	0.0186237	0.00233794	0.0171064	-0.0534165	0.0147345	0.0101774	0.0386615
-4.9224	-0.0709539	-0.0276846	0.138917	0.119157	-0.0069167	-0.0977089	-0.028461	0.0600418	-0.0932539	-0.0453523	-0.0641109	0.00786053	-0.0508331	-0.0245072	-0.00473337	0.0186108	0.00232682	0.0171141	-0.0534027	0.0147408	0.0101873	0.0386788
-4.92192	-0.0709719	-0.0276742	0.138946	0.119169	-0.00688425	-0.0977407	-0.0284474	0.0600424	-0.0932406	-0.0453177	-0.0640616	0.00783912	-0.050823	-0.0245058	-0.00470879	0.0185979	0.00231569	0.0171218	-0.053389	0.014747	0.0101972	0.038696
-4.92144	-0.0709899	-0.0276639	0.138975	0.119181	-0.00685182	-0.0977726	-0.0284338	0.060043	-0.0932273	-0.0452831	-0.0640122	0.00781773	-0.0508129	-0.0245044	-0.00468424	0.018585	0.00230458	0.0171294	-0.0533752	0.0147533	0.0102071	0.0387132
-4.92096	-0.0710081	-0.0276535	0.139005	0.119193	-0.00681934	-0.0978046	-0.0284203	0.0600436	-0.0932139	-0.0452485	-0.0639628	0.00779636	-0.0508028	-0.0245029	-0.00465969	0.0185722	0.00229348	0.0171371	-0.0533614	0.0147596	0.010217	0.0387304
-4.92048	-0.0710264	-0.0276431	0.139034	0.119205	-0.00678686	-0.0978368	-0.0284067	0.0600443	-0.0932005	-0.0452139	-0.0639134	0.00777502	-0.0507927	-0.0245015	-0.00463514	0.0185593	0.00228238	0.0171447	-0.0533477	0.0147658	0.0102269	0.0387476
-4.92	-0.0710446	-0.0276327	0.139063	0.119217	-0.00675436	-0.097869	-0.0283932	0.0600449	-0.0931871	-0.0451793	-0.0638641	0.00775371	-0.0507826	-0.0245	-0.00461062	0.0185465	0.00227129	0.0171523	-0.0533339	0.0147721	0.0102368	0.0387648
-4.91952	-0.0710629	-0.0276223	0.139092	0.119229	-0.00672184	-0.0979013	-0.0283797	0.0600456	-0.0931737	-0.0451448	-0.0638147	0.00773241	-0.0507725	-0.0244985	-0.0045861	0.0185337	0.00226022	0.01716	-0.0533201	0.0147784	0.0102466	0.038782
-4.91904	-0.0710812	-0.0276119	0.139122	0.119241	-0.00668931	-0.0979338	-0.0283662	0.0600463	-0.0931602	-0.0451102	-0.0637654	0.00771114	-0.0507624	-0.024497	-0.0045616	0.0185208	0.00224916	0.0171676	-0.0533063	0.0147846	0.0102564	0.0387991
-4.91856	-0.0710996	-0.0276014	0.139151	0.119253	-0.00665677	-0.0979663	-0.0283527	0.060047	-0.0931467	-0.0450757	-0.0637161	0.00768991	-0.0507523	-0.0244955	-0.0045371	0.018508	0.0022381	0.0171752	-0.0532925	0.0147909	0.0102663	0.0388163
-4.91808	-0.071118	-0.027591	0.13918	0.119265	-0.00662421	-0.097999	-0.0283392	0.0600476	-0.0931331	-0.0450411	-0.0636667	0.00766869	-0.0507422	-0.0244939	-0.00451262	0.0184952	0.00222705	0.0171828	-0.0532787	0.0147972	0.0102761	0.0388334
-4.9176	-0.0711365	-0.0275805	0.139209	0.119277	-0.00659162	-0.0980317	-0.0283257	0.0600483	-0.0931196	-0.0450065	-0.0636174	0.00764751	-0.050732	-0.0244924	-0.00448814	0.0184824	0.00221603	0.0171904	-0.0532649	0.0148035	0.0102859	0.0388505
-4.91712	-0.071155	-0.02757	0.139238	0.119288	-0.00655902	-0.0980645	-0.0283122	0.060049	-0.0931059	-0.044972	-0.0635681	0.00762632	-0.0507219	-0.0244909	-0.00446368	0.0184696	0.002205	0.0171979	-0.0532512	0.0148097	0.0102957	0.0388676
-4.91664	-0.0711736	-0.0275595	0.139267	0.1193	-0.00652641	-0.0980974	-0.0282987	0.0600497	-0.0930923	-0.0449374	-0.0635188	0.00760519	-0.0507117	-0.0244893	-0.00443923	0.0184569	0.00219398	0.0172055	-0.0532373	0.014816	0.0103055	0.0388846
-4.91616	-0.0711922	-0.027549	0.139296	0.119312	-0.00649378	-0.0981305	-0.0282853	0.0600505	-0.0930786	-0.0449029	-0.0634694	0.00758402	-0.0507016	-0.0244877	-0.00441479	0.0184441	0.00218298	0.0172131	-0.0532235	0.0148223	0.0103152	0.0389017
-4.91568	-0.071211	-0.0275385	0.139325	0.119324	-0.00646114	-0.0981636	-0.0282718	0.0600512	-0.0930649	-0.0448683	-0.0634202	0.00756288	-0.0506914	-0.0244861	-0.00439036	0.0184313	0.00217198	0.0172206	-0.0532097	0.0148285	0.010325	0.0389187
-4.9152	-0.0712297	-0.027528	0.139354	0.119336	-0.00642848	-0.0981969	-0.0282584	0.0600519	-0.0930512	-0.0448338	-0.0633709	0.00754176	-0.0506813	-0.0244845	-0.00436594	0.0184186	0.002161	0.0172282	-0.0531959	0.0148348	0.0103348	0.0389358
-4.91472	-0.0712485	-0.0275174	0.139383	0.119347	-0.00639579	-0.0982302	-0.0282449	0.0600527	-0.0930375	-0.0447993	-0.0633216	0.00752065	-0.0506711	-0.0244829	-0.00434152	0.0184059	0.00215002	0.0172358	-0.0531821	0.0148411	0.0103445	0.0389528
-4.91424	-0.0712674	-0.0275069	0.139412	0.119359	-0.0063631	-0.0982637	-0.0282315	0.0600534	-0.0930237	-0.0447647	-0.0632723	0.00749953	-0.0506609	-0.0244813	-0.00431711	0.0183931	0.00213905	0.0172433	-0.0531683	0.0148473	0.0103543	0.0389698
-4.91376	-0.0712862	-0.0274963	0.139441	0.119371	-0.00633038	-0.0982972	-0.0282181	0.0600541	-0.0930099	-0.0447302	-0.0632231	0.00747843	-0.0506508	-0.0244797	-0.00429272	0.0183804	0.00212809	0.0172508	-0.0531544	0.0148536	0.010364	0.0389867
-4.91328	-0.071305	-0.0274858	0.13947	0.119383	-0.00629766	-0.0983309	-0.0282047	0.0600549	-0.092996	-0.0446957	-0.0631738	0.00745735	-0.0506406	-0.024478	-0.00426833	0.0183677	0.00211713	0.0172584	-0.0531407	0.0148598	0.0103737	0.0390037
-4.9128	-0.0713238	-0.0274752	0.139499	0.119395	-0.00626492	-0.0983646	-0.0281913	0.0600557	-0.0929822	-0.0446612	-0.0631246	0.00743627	-0.0506304	-0.0244764	-0.00424396	0.018355	0.00210619	0.0172659	-0.0531268	0.014866	0.0103834	0.0390206
-4.91232	-0.0713427	-0.0274646	0.139527	0.119406	-0.00623216	-0.0983984	-0.0281779	0.0600564	-0.0929683	-0.0446267	-0.0630754	0.0074152	-0.0506202	-0.0244747	-0.00421959	0.0183424	0.00209525	0.0172734	-0.053113	0.0148723	0.0103931	0.0390376
-4.91184	-0.0713615	-0.027454	0.139556	0.119418	-0.00619938	-0.0984323	-0.0281645	0.0600572	-0.0929543	-0.0445922	-0.0630261	0.00739416	-0.05061	-0.0244731	-0.00419524	0.0183297	0.00208433	0.0172809	-0.0530992	0.0148785	0.0104028	0.0390545
-4.91136	-0.0713803	-0.0274434	0.139585	0.11943	-0.00616658	-0.0984663	-0.0281511	0.060058	-0.0929404	-0.0445576	-0.0629769	0.0073731	-0.0505999	-0.0244714	-0.00417088	0.018317	0.00207341	0.0172884	-0.0530854	0.0148847	0.0104124	0.0390714
-4.91088	-0.0713992	-0.0274328	0.139614	0.119442	-0.00613378	-0.0985004	-0.0281377	0.0600588	-0.0929264	-0.0445231	-0.0629277	0.00735209	-0.0505897	-0.0244697	-0.00414654	0.0183044	0.0020625	0.0172959	-0.0530716	0.0148909	0.0104221	0.0390882
-4.9104	-0.0714181	-0.0274221	0.139642	0.119454	-0.00610094	-0.0985346	-0.0281243	0.0600596	-0.0929124	-0.0444886	-0.0628784	0.00733105	-0.0505795	-0.024468	-0.0041222	0.0182917	0.0020516	0.0173034	-0.0530578	0.0148971	0.0104318	0.0391051
-4.90992	-0.071437	-0.0274115	0.139671	0.119465	-0.0060681	-0.0985688	-0.0281109	0.0600604	-0.0928983	-0.0444541	-0.0628293	0.00731004	-0.0505693	-0.0244662	-0.00409787	0.0182791	0.00204071	0.0173108	-0.053044	0.0149033	0.0104414	0.0391219
-4.90944	-0.0714561	-0.0274008	0.1397	0.119477	-0.00603524	-0.0986032	-0.0280975	0.0600612	-0.0928842	-0.0444196	-0.06278	0.00728903	-0.0505591	-0.0244645	-0.00407354	0.0182665	0.00202983	0.0173183	-0.0530302	0.0149095	0.0104511	0.0391387
-4.90896	-0.0714751	-0.0273901	0.139728	0.119489	-0.00600235	-0.0986376	-0.0280841	0.060062	-0.0928701	-0.0443852	-0.0627308	0.00726804	-0.0505489	-0.0244628	-0.00404922	0.0182539	0.00201896	0.0173257	-0.0530164	0.0149157	0.0104607	0.0391555
-4.90848	-0.0714941	-0.0273795	0.139757	0.119501	-0.00596947	-0.0986721	-0.0280707	0.0600628	-0.092856	-0.0443506	-0.0626816	0.00724705	-0.0505387	-0.024461	-0.00402491	0.0182413	0.00200811	0.0173332	-0.0530026	0.0149219	0.0104703	0.0391723
-4.908	-0.0715132	-0.0273687	0.139786	0.119512	-0.00593656	-0.0987066	-0.0280572	0.0600636	-0.0928418	-0.0443162	-0.0626324	0.00722608	-0.0505285	-0.0244593	-0.00400061	0.0182287	0.00199727	0.0173406	-0.0529888	0.0149281	0.0104799	0.0391891
-4.90752	-0.0715324	-0.027358	0.139814	0.119524	-0.00590363	-0.0987412	-0.0280438	0.0600644	-0.0928276	-0.0442817	-0.0625832	0.00720513	-0.0505183	-0.0244575	-0.00397632	0.0182161	0.00198642	0.017348	-0.052975	0.0149343	0.0104895	0.0392059
-4.90704	-0.0715515	-0.0273473	0.139843	0.119536	-0.00587068	-0.0987759	-0.0280304	0.0600653	-0.0928133	-0.0442472	-0.062534	0.0071842	-0.0505081	-0.0244557	-0.00395203	0.0182035	0.00197559	0.0173554	-0.0529612	0.0149404	0.0104991	0.0392226
-4.90656	-0.0715708	-0.0273365	0.139871	0.119548	-0.00583772	-0.0988107	-0.028017	0.0600661	-0.0927991	-0.0442127	-0.0624848	0.00716325	-0.0504979	-0.0244539	-0.00392775	0.0181909	0.00196477	0.0173628	-0.0529474	0.0149466	0.0105087	0.0392393
-4.90608	-0.0715901	-0.0273257	0.139899	0.119559	-0.00580473	-0.0988455	-0.0280036	0.0600669	-0.0927847	-0.0441782	-0.0624357	0.00714232	-0.0504877	-0.0244521	-0.00390349	0.0181783	0.00195396	0.0173702	-0.0529336	0.0149528	0.0105183	0.039256
-4.9056	-0.0716096	-0.0273149	0.139928	0.119571	-0.00577174	-0.0988804	-0.0279902	0.0600678	-0.0927704	-0.0441438	-0.0623865	0.00712138	-0.0504775	-0.0244503	-0.00387925	0.0181657	0.00194317	0.0173775	-0.0529198	0.014959	0.0105278	0.0392727
-4.90512	-0.0716291	-0.0273041	0.139956	0.119583	-0.00573872	-0.0989154	-0.0279767	0.0600686	-0.092756	-0.0441093	-0.0623374	0.00710045	-0.0504672	-0.0244485	-0.00385501	0.0181531	0.00193237	0.0173849	-0.0529059	0.0149652	0.0105374	0.0392894
-4.90464	-0.0716486	-0.0272932	0.139985	0.119594	-0.0057057	-0.0989505	-0.0279633	0.0600695	-0.0927416	-0.0440748	-0.0622882	0.00707953	-0.050457	-0.0244467	-0.00383079	0.0181405	0.00192158	0.0173923	-0.0528921	0.0149713	0.0105469	0.039306
-4.90416	-0.0716684	-0.0272824	0.140013	0.119606	-0.00567264	-0.0989856	-0.0279499	0.0600703	-0.0927271	-0.0440403	-0.0622391	0.00705864	-0.0504468	-0.0244448	-0.00380659	0.0181279	0.00191081	0.0173996	-0.0528783	0.0149775	0.0105564	0.0393227
-4.90368	-0.0716882	-0.0272715	0.140041	0.119618	-0.00563957	-0.0990207	-0.0279365	0.0600712	-0.0927126	-0.0440059	-0.0621899	0.00703773	-0.0504366	-0.024443	-0.00378239	0.0181153	0.00190004	0.017407	-0.0528645	0.0149836	0.010566	0.0393393
-4.9032	-0.071708	-0.0272606	0.14007	0.119629	-0.00560648	-0.099056	-0.0279231	0.0600721	-0.0926981	-0.0439714	-0.0621408	0.00701686	-0.0504264	-0.0244411	-0.00375821	0.0181027	0.00188929	0.0174143	-0.0528506	0.0149898	0.0105755	0.0393559
-4.90272	-0.0717279	-0.0272496	0.140098	0.119641	-0.00557337	-0.0990914	-0.0279097	0.0600729	-0.0926836	-0.0439369	-0.0620916	0.00699598	-0.0504162	-0.0244392	-0.00373403	0.0180902	0.00187853	0.0174217	-0.0528368	0.0149959	0.010585	0.0393725
-4.90224	-0.0717478	-0.0272387	0.140126	0.119653	-0.00554025	-0.0991268	-0.0278963	0.0600738	-0.092669	-0.0439024	-0.0620425	0.00697508	-0.0504059	-0.0244373	-0.00370988	0.0180776	0.0018678	0.017429	-0.0528229	0.0150021	0.0105945	0.039389
-4.90176	-0.0717678	-0.0272277	0.140154	0.119664	-0.0055071	-0.0991624	-0.0278829	0.0600747	-0.0926543	-0.043868	-0.0619934	0.00695418	-0.0503957	-0.0244354	-0.00368572	0.018065	0.00185706	0.0174363	-0.0528091	0.0150082	0.010604	0.0394056
-4.90128	-0.0717879	-0.0272167	0.140182	0.119676	-0.00547393	-0.099198	-0.0278694	0.0600756	-0.0926397	-0.0438335	-0.0619443	0.00693333	-0.0503855	-0.0244335	-0.0036616	0.0180524	0.00184635	0.0174437	-0.0527953	0.0150143	0.0106134	0.0394221
-4.9008	-0.071808	-0.0272057	0.140211	0.119687	-0.00544074	-0.0992338	-0.027856	0.0600765	-0.092625	-0.043799	-0.0618952	0.00691244	-0.0503752	-0.0244315	-0.00363746	0.0180399	0.00183563	0.017451	-0.0527814	0.0150205	0.0106229	0.0394386
-4.90032	-0.0718282	-0.0271947	0.140239	0.119699	-0.00540754	-0.0992696	-0.0278426	0.0600774	-0.0926102	-0.0437646	-0.0618462	0.00689161	-0.050365	-0.0244296	-0.00361335	0.0180273	0.00182492	0.0174582	-0.0527675	0.0150266	0.0106324	0.0394551
-4.89984	-0.0718484	-0.0271836	0.140267	0.11971	-0.00537432	-0.0993055	-0.0278292	0.0600783	-0.0925955	-0.0437301	-0.061797	0.00687074	-0.0503547	-0.0244276	-0.00358925	0.0180147	0.00181422	0.0174655	-0.0527537	0.0150327	0.0106418	0.0394716
-4.89936	-0.0718687	-0.0271726	0.140295	0.119722	-0.00534107	-0.0993415	-0.0278157	0.0600792	-0.0925806	-0.0436956	-0.061748	0.00684992	-0.0503445	-0.0244256	-0.00356516	0.0180022	0.00180353	0.0174728	-0.0527398	0.0150388	0.0106512	0.0394881
-4.89888	-0.071889	-0.0271615	0.140323	0.119733	-0.0053078	-0.0993777	-0.0278023	0.0600802	-0.0925658	-0.0436612	-0.0616989	0.00682909	-0.0503342	-0.0244236	-0.00354109	0.0179896	0.00179285	0.0174801	-0.0527259	0.015045	0.0106607	0.0395046
-4.8984	-0.0719093	-0.0271504	0.140351	0.119745	-0.00527453	-0.0994139	-0.0277889	0.0600811	-0.0925509	-0.0436267	-0.0616498	0.00680829	-0.050324	-0.0244216	-0.00351703	0.017977	0.00178217	0.0174873	-0.052712	0.0150511	0.0106701	0.039521
-4.89792	-0.0719296	-0.0271392	0.140379	0.119756	-0.00524123	-0.0994503	-0.0277755	0.060082	-0.092536	-0.0435922	-0.0616007	0.00678747	-0.0503137	-0.0244195	-0.00349297	0.0179645	0.0017715	0.0174946	-0.0526981	0.0150572	0.0106795	0.0395375
-4.89744	-0.0719501	-0.0271281	0.140407	0.119768	-0.00520791	-0.0994867	-0.0277621	0.060083	-0.092521	-0.0435578	-0.0615516	0.0067667	-0.0503035	-0.0244175	-0.00346893	0.0179519	0.00176083	0.0175018	-0.0526842	0.0150633	0.0106889	0.0395539
-4.89696	-0.0719705	-0.0271169	0.140435	0.119779	-0.00517457	-0.0995233	-0.0277487	0.0600839	-0.092506	-0.0435233	-0.0615025	0.0067459	-0.0502932	-0.0244154	-0.00344492	0.0179394	0.00175018	0.017509	-0.0526703	0.0150693	0.0106983	0.0395703
-4.89648	-0.0719911	-0.0271057	0.140463	0.11979	-0.00514122	-0.0995599	-0.0277352	0.0600849	-0.092491	-0.0434889	-0.0614535	0.00672513	-0.0502829	-0.0244133	-0.00342091	0.0179268	0.00173953	0.0175162	-0.0526564	0.0150754	0.0107077	0.0395867
-4.896	-0.0720117	-0.0270945	0.140491	0.119802	-0.00510784	-0.0995967	-0.0277218	0.0600858	-0.0924759	-0.0434544	-0.0614044	0.00670437	-0.0502727	-0.0244112	-0.0033969	0.0179143	0.00172889	0.0175234	-0.0526425	0.0150815	0.010717	0.039603
-4.89552	-0.0720324	-0.0270833	0.140519	0.119813	-0.00507444	-0.0996335	-0.0277084	0.0600868	-0.0924608	-0.04342	-0.0613554	0.00668363	-0.0502624	-0.0244091	-0.00337291	0.0179018	0.00171827	0.0175307	-0.0526286	0.0150876	0.0107264	0.0396194
-4.89504	-0.0720531	-0.027072	0.140546	0.119825	-0.00504102	-0.0996705	-0.027695	0.0600878	-0.0924457	-0.0433855	-0.0613063	0.0066629	-0.0502521	-0.024407	-0.00334893	0.0178893	0.00170765	0.0175378	-0.0526147	0.0150937	0.0107357	0.0396357
-4.89456	-0.0720738	-0.0270607	0.140574	0.119836	-0.00500759	-0.0997075	-0.0276816	0.0600888	-0.0924305	-0.0433511	-0.0612573	0.0066422	-0.0502418	-0.0244048	-0.00332497	0.0178768	0.00169704	0.017545	-0.0526007	0.0150998	0.010745	0.0396521
-4.89408	-0.0720946	-0.0270495	0.140602	0.119847	-0.00497413	-0.0997446	-0.0276682	0.0600898	-0.0924153	-0.0433166	-0.0612082	0.00662149	-0.0502315	-0.0244027	-0.00330101	0.0178643	0.00168644	0.0175522	-0.0525868	0.0151058	0.0107544	0.0396684
-4.8936	-0.0721154	-0.0270382	0.14063	0.119859	-0.00494066	-0.0997819	-0.0276548	0.0600908	-0.0924001	-0.0432822	-0.0611592	0.00660081	-0.0502213	-0.0244006	-0.00327707	0.0178517	0.00167585	0.0175594	-0.0525729	0.0151119	0.0107637	0.0396847
-4.89312	-0.0721363	-0.0270268	0.140658	0.11987	-0.00490717	-0.0998192	-0.0276414	0.0600918	-0.0923848	-0.0432477	-0.0611102	0.00658015	-0.0502109	-0.0243984	-0.00325314	0.0178393	0.00166528	0.0175665	-0.0525589	0.015118	0.010773	0.0397009
-4.89264	-0.0721573	-0.0270155	0.140685	0.119881	-0.00487366	-0.0998567	-0.027628	0.0600928	-0.0923695	-0.0432133	-0.0610611	0.00655952	-0.0502006	-0.0243963	-0.00322923	0.0178267	0.00165471	0.0175737	-0.0525449	0.015124	0.0107823	0.0397172
-4.89216	-0.0721783	-0.0270041	0.140713	0.119892	-0.00484012	-0.0998942	-0.0276146	0.0600938	-0.0923542	-0.0431788	-0.0610121	0.0065389	-0.0501903	-0.0243941	-0.00320533	0.0178142	0.00164414	0.0175808	-0.052531	0.0151301	0.0107915	0.0397335
-4.89168	-0.0721993	-0.0269927	0.140741	0.119903	-0.00480657	-0.0999318	-0.0276012	0.0600949	-0.0923389	-0.0431443	-0.060963	0.00651833	-0.05018	-0.0243919	-0.00318145	0.0178017	0.00163359	0.017588	-0.052517	0.0151361	0.0108008	0.0397497
-4.8912	-0.0722204	-0.0269813	0.140768	0.119915	-0.004773	-0.0999695	-0.0275879	0.0600959	-0.0923235	-0.0431098	-0.060914	0.00649777	-0.0501697	-0.0243897	-0.00315757	0.0177892	0.00162304	0.0175951	-0.0525031	0.0151422	0.01081	0.0397659
-4.89072	-0.0722415	-0.0269699	0.140796	0.119926	-0.00473941	-0.100007	-0.0275745	0.060097	-0.0923081	-0.0430754	-0.060865	0.00647726	-0.0501594	-0.0243875	-0.0031337	0.0177767	0.0016125	0.0176022	-0.0524891	0.0151483	0.0108193	0.0397821
-4.89024	-0.0722626	-0.0269585	0.140823	0.119937	-0.00470581	-0.100045	-0.0275611	0.060098	-0.0922927	-0.0430409	-0.0608159	0.00645674	-0.050149	-0.0243852	-0.00310985	0.0177642	0.00160197	0.0176094	-0.0524751	0.0151543	0.0108285	0.0397983
-4.88976	-0.0722837	-0.026947	0.140851	0.119948	-0.00467219	-0.100083	-0.0275477	0.0600991	-0.0922772	-0.0430064	-0.0607669	0.00643626	-0.0501387	-0.024383	-0.00308601	0.0177517	0.00159145	0.0176165	-0.0524611	0.0151604	0.0108377	0.0398145
-4.88928	-0.0723049	-0.0269356	0.140879	0.119959	-0.00463854	-0.100121	-0.0275343	0.0601002	-0.0922617	-0.0429719	-0.0607179	0.0064158	-0.0501284	-0.0243807	-0.00306217	0.0177393	0.00158094	0.0176236	-0.0524472	0.0151665	0.0108469	0.0398306
-4.8888	-0.0723261	-0.0269241	0.140906	0.11997	-0.00460489	-0.100159	-0.0275209	0.0601012	-0.0922462	-0.0429375	-0.060669	0.00639543	-0.050118	-0.0243784	-0.00303835	0.0177268	0.00157044	0.0176307	-0.0524332	0.0151725	0.0108561	0.0398468
-4.88832	-0.0723473	-0.0269126	0.140934	0.119981	-0.00457122	-0.100197	-0.0275075	0.0601023	-0.0922306	-0.042903	-0.0606199	0.0063751	-0.0501077	-0.0243761	-0.00301454	0.0177143	0.00155995	0.0176378	-0.0524192	0.0151786	0.0108653	0.0398629
-4.88784	-0.0723686	-0.0269011	0.140961	0.119992	-0.00453752	-0.100236	-0.0274942	0.0601034	-0.0922151	-0.0428685	-0.060571	0.00635479	-0.0500973	-0.0243738	-0.00299073	0.0177018	0.00154946	0.0176449	-0.0524052	0.0151847	0.0108745	0.039879
-4.88736	-0.0723898	-0.0268895	0.140988	0.120003	-0.00450381	-0.100274	-0.0274808	0.0601045	-0.0921995	-0.042834	-0.060522	0.00633454	-0.0500869	-0.0243715	-0.00296695	0.0176893	0.00153899	0.0176519	-0.0523912	0.0151908	0.0108836	0.0398951
-4.88688	-0.0724111	-0.026878	0.141016	0.120014	-0.00447007	-0.100312	-0.0274674	0.0601056	-0.0921839	-0.0427995	-0.060473	0.00631429	-0.0500766	-0.0243692	-0.00294317	0.0176769	0.00152852	0.017659	-0.0523771	0.0151968	0.0108928	0.0399112
-4.8864	-0.0724324	-0.0268665	0.141043	0.120025	-0.00443632	-0.100351	-0.0274541	0.0601067	-0.0921682	-0.0427651	-0.0604241	0.00629411	-0.0500662	-0.0243668	-0.00291941	0.0176644	0.00151806	0.0176661	-0.0523631	0.0152029	0.0109019	0.0399272
-4.88592	-0.0724538	-0.0268549	0.141071	0.120036	-0.00440255	-0.10039	-0.0274407	0.0601078	-0.0921526	-0.0427306	-0.0603752	0.00627393	-0.0500558	-0.0243644	-0.00289566	0.0176519	0.00150761	0.0176731	-0.0523491	0.015209	0.0109111	0.0399432
-4.88544	-0.0724753	-0.0268433	0.141098	0.120047	-0.00436877	-0.100428	-0.0274273	0.060109	-0.0921369	-0.0426961	-0.0603262	0.0062538	-0.0500455	-0.024362	-0.00287192	0.0176395	0.00149717	0.0176801	-0.0523351	0.015215	0.0109202	0.0399592
-4.88496	-0.0724969	-0.0268317	0.141125	0.120058	-0.00433497	-0.100467	-0.027414	0.0601101	-0.0921211	-0.0426616	-0.0602773	0.0062337	-0.0500351	-0.0243596	-0.0028482	0.017627	0.00148674	0.0176872	-0.0523211	0.0152211	0.0109293	0.0399752
-4.88448	-0.0725186	-0.0268201	0.141153	0.120069	-0.00430114	-0.100506	-0.0274006	0.0601112	-0.0921054	-0.0426271	-0.0602284	0.00621363	-0.0500247	-0.0243572	-0.00282449	0.0176146	0.00147631	0.0176942	-0.0523071	0.0152271	0.0109384	0.0399912
-4.884	-0.0725403	-0.0268085	0.14118	0.12008	-0.0042673	-0.100545	-0.0273872	0.0601124	-0.0920895	-0.0425927	-0.0601795	0.00619361	-0.0500143	-0.0243547	-0.0028008	0.0176021	0.0014659	0.0177012	-0.052293	0.0152332	0.0109474	0.0400071
-4.88352	-0.0725621	-0.0267969	0.141207	0.120091	-0.00423344	-0.100584	-0.0273739	0.0601135	-0.0920737	-0.0425582	-0.0601306	0.0061736	-0.0500039	-0.0243522	-0.00277712	0.0175897	0.00145549	0.0177082	-0.052279	0.0152392	0.0109565	0.040023
-4.88304	-0.0725839	-0.0267852	0.141234	0.120102	-0.00419955	-0.100623	-0.0273605	0.0601147	-0.0920579	-0.0425237	-0.0600818	0.00615365	-0.0499935	-0.0243498	-0.00275346	0.0175773	0.00144509	0.0177152	-0.0522649	0.0152453	0.0109656	0.0400389
-4.88256	-0.0726058	-0.0267736	0.141261	0.120113	-0.00416566	-0.100663	-0.0273471	0.0601159	-0.092042	-0.0424892	-0.0600329	0.00613372	-0.0499831	-0.0243472	-0.00272982	0.0175648	0.0014347	0.0177222	-0.0522509	0.0152513	0.0109746	0.0400548
-4.88208	-0.0726276	-0.0267619	0.141289	0.120124	-0.00413174	-0.100702	-0.0273338	0.060117	-0.0920261	-0.0424548	-0.0599841	0.00611383	-0.0499727	-0.0243447	-0.0027062	0.0175524	0.00142432	0.0177292	-0.0522368	0.0152574	0.0109837	0.0400707
-4.8816	-0.0726495	-0.0267502	0.141316	0.120134	-0.00409781	-0.100742	-0.0273204	0.0601182	-0.0920102	-0.0424203	-0.0599353	0.00609398	-0.0499623	-0.0243421	-0.00268258	0.01754	0.00141396	0.0177361	-0.0522228	0.0152634	0.0109927	0.0400865
-4.88112	-0.0726714	-0.0267385	0.141343	0.120145	-0.00406387	-0.100781	-0.027307	0.0601194	-0.0919943	-0.0423858	-0.0598865	0.00607416	-0.0499519	-0.0243395	-0.00265901	0.0175276	0.0014036	0.0177431	-0.0522087	0.0152695	0.0110017	0.0401024
-4.88064	-0.0726934	-0.0267268	0.14137	0.120156	-0.00402989	-0.100821	-0.0272936	0.0601206	-0.0919783	-0.0423513	-0.0598378	0.00605438	-0.0499415	-0.0243369	-0.00263542	0.0175152	0.00139325	0.01775	-0.0521946	0.0152755	0.0110107	0.0401182
-4.88016	-0.0727154	-0.0267151	0.141397	0.120167	-0.00399591	-0.100861	-0.0272803	0.0601218	-0.0919623	-0.0423169	-0.0597891	0.00603461	-0.0499311	-0.0243343	-0.00261187	0.0175028	0.00138291	0.017757	-0.0521806	0.0152815	0.0110197	0.040134
-4.87968	-0.0727373	-0.0267034	0.141424	0.120178	-0.00396191	-0.100901	-0.0272669	0.060123	-0.0919463	-0.0422824	-0.0597403	0.00601487	-0.0499207	-0.0243317	-0.00258833	0.0174904	0.00137257	0.0177639	-0.0521665	0.0152876	0.0110287	0.0401498
-4.8792	-0.0727593	-0.0266917	0.141451	0.120188	-0.0039279	-0.100941	-0.0272535	0.0601242	-0.0919303	-0.0422479	-0.0596917	0.00599517	-0.0499103	-0.024329	-0.0025648	0.017478	0.00136227	0.0177709	-0.0521524	0.0152936	0.0110376	0.0401655
-4.87872	-0.0727813	-0.0266799	0.141478	0.120199	-0.00389386	-0.100981	-0.0272401	0.0601255	-0.0919142	-0.0422134	-0.059643	0.00597551	-0.0498998	-0.0243264	-0.00254128	0.0174657	0.00135196	0.0177778	-0.0521383	0.0152996	0.0110466	0.0401813
-4.87824	-0.0728034	-0.0266682	0.141505	0.12021	-0.00385981	-0.101021	-0.0272267	0.0601267	-0.0918982	-0.042179	-0.0595944	0.00595591	-0.0498894	-0.0243237	-0.00251779	0.0174533	0.00134167	0.0177847	-0.0521242	0.0153056	0.0110555	0.040197
-4.87776	-0.0728254	-0.0266564	0.141532	0.120221	-0.00382573	-0.101062	-0.0272133	0.0601279	-0.0918821	-0.0421445	-0.0595457	0.00593631	-0.049879	-0.0243209	-0.00249429	0.017441	0.0013314	0.0177916	-0.0521102	0.0153116	0.0110644	0.0402127
-4.87728	-0.0728475	-0.0266447	0.141559	0.120231	-0.00379165	-0.101102	-0.0271999	0.0601292	-0.091866	-0.04211	-0.0594971	0.00591678	-0.0498686	-0.0243182	-0.00247082	0.0174287	0.00132114	0.0177984	-0.052096	0.0153176	0.0110734	0.0402284
-4.8768	-0.0728696	-0.0266329	0.141586	0.120242	-0.00375755	-0.101143	-0.0271866	0.0601305	-0.0918498	-0.0420756	-0.0594485	0.00589726	-0.0498582	-0.0243154	-0.00244736	0.0174164	0.00131088	0.0178053	-0.0520819	0.0153236	0.0110823	0.0402441
-4.87632	-0.0728917	-0.0266211	0.141612	0.120253	-0.00372343	-0.101184	-0.0271732	0.0601317	-0.0918337	-0.0420411	-0.0594	0.0058778	-0.0498478	-0.0243126	-0.00242392	0.0174041	0.00130064	0.0178122	-0.0520678	0.0153296	0.0110912	0.0402597
-4.87584	-0.0729139	-0.0266093	0.141639	0.120263	-0.00368929	-0.101224	-0.0271598	0.060133	-0.0918175	-0.0420066	-0.0593514	0.00585838	-0.0498374	-0.0243098	-0.00240048	0.0173917	0.0012904	0.017819	-0.0520537	0.0153356	0.0111	0.0402754
-4.87536	-0.072936	-0.0265975	0.141666	0.120274	-0.00365514	-0.101265	-0.0271464	0.0601343	-0.0918013	-0.0419721	-0.0593029	0.005839	-0.0498269	-0.0243069	-0.00237708	0.0173795	0.00128019	0.0178259	-0.0520396	0.0153416	0.0111089	0.040291
-4.87488	-0.0729581	-0.0265857	0.141693	0.120284	-0.00362096	-0.101306	-0.027133	0.0601356	-0.091785	-0.0419376	-0.0592544	0.00581967	-0.0498165	-0.0243041	-0.00235369	0.0173672	0.00126998	0.0178327	-0.0520254	0.0153476	0.0111177	0.0403066
-4.8744	-0.0729802	-0.0265739	0.14172	0.120295	-0.00358677	-0.101347	-0.0271196	0.0601369	-0.0917688	-0.0419031	-0.059206	0.00580039	-0.0498061	-0.0243011	-0.00233032	0.0173549	0.00125979	0.0178395	-0.0520113	0.0153535	0.0111265	0.0403222
-4.87392	-0.0730024	-0.0265621	0.141747	0.120305	-0.00355257	-0.101388	-0.0271062	0.0601382	-0.0917525	-0.0418686	-0.0591575	0.00578113	-0.0497957	-0.0242982	-0.00230694	0.0173427	0.00124961	0.0178463	-0.0519972	0.0153595	0.0111354	0.0403377
-4.87344	-0.0730245	-0.0265502	0.141773	0.120316	-0.00351833	-0.101429	-0.0270928	0.0601395	-0.0917362	-0.0418342	-0.0591092	0.00576192	-0.0497853	-0.0242952	-0.0022836	0.0173305	0.00123944	0.0178532	-0.051983	0.0153654	0.0111442	0.0403533
-4.87296	-0.0730467	-0.0265384	0.1418	0.120327	-0.0034841	-0.101471	-0.0270794	0.0601408	-0.0917199	-0.0417997	-0.0590607	0.00574274	-0.0497749	-0.0242921	-0.00226025	0.0173183	0.0012293	0.01786	-0.0519689	0.0153714	0.0111529	0.0403688
-4.87248	-0.0730689	-0.0265265	0.141827	0.120337	-0.00344985	-0.101512	-0.0270661	0.0601421	-0.0917035	-0.0417652	-0.0590123	0.00572361	-0.0497645	-0.0242891	-0.00223694	0.0173061	0.00121915	0.0178668	-0.0519548	0.0153773	0.0111617	0.0403843
-4.872	-0.0730912	-0.0265146	0.141853	0.120347	-0.00341556	-0.101553	-0.0270527	0.0601435	-0.0916872	-0.0417307	-0.058964	0.00570449	-0.0497541	-0.024286	-0.00221363	0.0172939	0.00120901	0.0178736	-0.0519406	0.0153832	0.0111705	0.0403998
-4.87152	-0.0731134	-0.0265027	0.14188	0.120358	-0.00338127	-0.101595	-0.0270393	0.0601448	-0.0916708	-0.0416962	-0.0589157	0.00568543	-0.0497437	-0.0242829	-0.00219035	0.0172817	0.00119889	0.0178804	-0.0519265	0.0153891	0.0111792	0.0404153
-4.87104	-0.0731357	-0.0264908	0.141907	0.120368	-0.00334696	-0.101637	-0.0270259	0.0601462	-0.0916544	-0.0416617	-0.0588673	0.00566639	-0.0497333	-0.0242797	-0.00216707	0.0172695	0.00118878	0.0178872	-0.0519124	0.015395	0.0111879	0.0404307
-4.87056	-0.073158	-0.0264788	0.141933	0.120379	-0.00331264	-0.101678	-0.0270125	0.0601476	-0.091638	-0.0416272	-0.058819	0.0056474	-0.0497229	-0.0242765	-0.00214381	0.0172574	0.00117868	0.017894	-0.0518982	0.0154009	0.0111966	0.0404462
-4.87008	-0.0731804	-0.0264669	0.14196	0.120389	-0.00327829	-0.10172	-0.0269991	0.0601489	-0.0916216	-0.0415927	-0.0587707	0.00562843	-0.0497125	-0.0242733	-0.00212057	0.0172453	0.00116859	0.0179008	-0.051884	0.0154068	0.0112053	0.0404616
-4.8696	-0.0732027	-0.0264549	0.141987	0.120399	-0.00324393	-0.101762	-0.0269857	0.0601503	-0.0916051	-0.0415582	-0.0587225	0.00560951	-0.0497021	-0.02427	-0.00209736	0.0172332	0.00115852	0.0179076	-0.0518699	0.0154127	0.011214	0.040477
-4.86912	-0.0732251	-0.026443	0.142013	0.12041	-0.00320954	-0.101804	-0.0269723	0.0601517	-0.0915886	-0.0415237	-0.0586742	0.00559061	-0.0496917	-0.0242667	-0.00207414	0.0172211	0.00114845	0.0179144	-0.0518557	0.0154186	0.0112227	0.0404924
-4.86864	-0.0732475	-0.0264309	0.14204	0.12042	-0.00317515	-0.101846	-0.0269589	0.0601531	-0.0915721	-0.0414892	-0.058626	0.00557178	-0.0496812	-0.0242633	-0.00205095	0.017209	0.0011384	0.0179211	-0.0518416	0.0154245	0.0112313	0.0405078
-4.86816	-0.07327	-0.0264189	0.142066	0.12043	-0.00314073	-0.101888	-0.0269455	0.0601545	-0.0915556	-0.0414547	-0.0585777	0.00555296	-0.0496709	-0.0242599	-0.00202777	0.0171969	0.00112835	0.0179279	-0.0518274	0.0154303	0.0112399	0.0405231
-4.86768	-0.0732925	-0.0264069	0.142093	0.12044	-0.0031063	-0.10193	-0.0269321	0.0601559	-0.091539	-0.0414202	-0.0585295	0.00553422	-0.0496604	-0.0242565	-0.00200463	0.0171849	0.00111832	0.0179347	-0.0518132	0.0154362	0.0112486	0.0405384
-4.8672	-0.0733151	-0.0263948	0.142119	0.12045	-0.00307184	-0.101972	-0.0269186	0.0601573	-0.0915224	-0.0413857	-0.0584814	0.0055155	-0.04965	-0.0242531	-0.0019815	0.0171729	0.00110831	0.0179414	-0.051799	0.0154421	0.0112572	0.0405538
-4.86672	-0.0733377	-0.0263828	0.142146	0.12046	-0.00303737	-0.102014	-0.0269052	0.0601588	-0.0915058	-0.0413512	-0.0584332	0.00549686	-0.0496396	-0.0242497	-0.00195837	0.0171609	0.0010983	0.0179482	-0.0517849	0.0154479	0.0112657	0.0405691
-4.86624	-0.0733604	-0.0263707	0.142172	0.120471	-0.00300288	-0.102057	-0.0268918	0.0601602	-0.0914892	-0.0413166	-0.058385	0.00547823	-0.0496292	-0.0242462	-0.00193528	0.0171489	0.0010883	0.0179549	-0.0517707	0.0154537	0.0112743	0.0405844
-4.86576	-0.0733831	-0.0263586	0.142199	0.120481	-0.00296837	-0.102099	-0.0268783	0.0601617	-0.0914725	-0.0412821	-0.0583369	0.00545969	-0.0496188	-0.0242427	-0.00191219	0.0171369	0.00107831	0.0179617	-0.0517565	0.0154596	0.0112828	0.0405996
-4.86528	-0.0734059	-0.0263465	0.142225	0.120491	-0.00293384	-0.102142	-0.0268649	0.0601631	-0.0914558	-0.0412476	-0.0582887	0.00544116	-0.0496084	-0.0242392	-0.00188913	0.0171249	0.00106834	0.0179684	-0.0517423	0.0154654	0.0112914	0.0406149
-4.8648	-0.0734287	-0.0263344	0.142252	0.120501	-0.00289931	-0.102185	-0.0268515	0.0601646	-0.0914391	-0.0412131	-0.0582407	0.0054227	-0.049598	-0.0242357	-0.00186608	0.017113	0.00105837	0.0179752	-0.0517281	0.0154712	0.0112999	0.0406301
-4.86432	-0.0734515	-0.0263222	0.142278	0.120511	-0.00286474	-0.102228	-0.026838	0.0601661	-0.0914224	-0.0411785	-0.0581925	0.00540429	-0.0495876	-0.0242322	-0.00184303	0.017101	0.00104842	0.0179819	-0.0517139	0.015477	0.0113084	0.0406453
-4.86384	-0.0734745	-0.0263101	0.142304	0.120521	-0.00283016	-0.102271	-0.0268246	0.0601675	-0.0914057	-0.041144	-0.0581445	0.00538592	-0.0495772	-0.0242286	-0.00182003	0.0170891	0.00103848	0.0179886	-0.0516997	0.0154828	0.0113169	0.0406605
-4.86336	-0.0734975	-0.0262979	0.142331	0.120531	-0.00279557	-0.102314	-0.0268111	0.060169	-0.0913889	-0.0411094	-0.0580965	0.00536758	-0.0495668	-0.024225	-0.001797	0.0170772	0.00102854	0.0179953	-0.0516855	0.0154886	0.0113253	0.0406757
-4.86288	-0.0735207	-0.0262857	0.142357	0.120541	-0.00276095	-0.102357	-0.0267977	0.0601705	-0.0913721	-0.0410749	-0.0580484	0.0053493	-0.0495563	-0.0242214	-0.00177401	0.0170653	0.00101862	0.018002	-0.0516713	0.0154944	0.0113338	0.0406909
-4.8624	-0.0735439	-0.0262735	0.142383	0.120551	-0.00272631	-0.1024	-0.0267842	0.060172	-0.0913553	-0.0410403	-0.0580005	0.00533104	-0.0495459	-0.0242178	-0.00175102	0.0170534	0.00100871	0.0180087	-0.0516571	0.0155002	0.0113422	0.0407061
-4.86192	-0.0735671	-0.0262613	0.14241	0.12056	-0.00269166	-0.102443	-0.0267708	0.0601735	-0.0913385	-0.0410058	-0.0579525	0.00531284	-0.0495355	-0.0242141	-0.00172805	0.0170416	0.000998815	0.0180154	-0.0516429	0.015506	0.0113506	0.0407212
-4.86144	-0.0735904	-0.0262491	0.142436	0.12057	-0.002657	-0.102486	-0.0267573	0.0601751	-0.0913217	-0.0409712	-0.0579045	0.00529468	-0.0495251	-0.0242104	-0.00170511	0.0170297	0.000988927	0.0180221	-0.0516286	0.0155118	0.0113591	0.0407363
-4.86096	-0.0736137	-0.0262369	0.142462	0.12058	-0.00262231	-0.10253	-0.0267439	0.0601766	-0.0913049	-0.0409366	-0.0578566	0.00527656	-0.0495147	-0.0242067	-0.00168218	0.0170179	0.000979052	0.0180288	-0.0516144	0.0155175	0.0113674	0.0407514
-4.86048	-0.0736371	-0.0262246	0.142489	0.12059	-0.00258761	-0.102573	-0.0267304	0.0601781	-0.0912881	-0.0409021	-0.0578086	0.00525847	-0.0495042	-0.024203	-0.00165925	0.017006	0.000969199	0.0180354	-0.0516002	0.0155233	0.0113758	0.0407665
-4.86	-0.0736606	-0.0262124	0.142515	0.1206	-0.00255288	-0.102617	-0.026717	0.0601797	-0.0912712	-0.0408675	-0.0577608	0.00524042	-0.0494938	-0.0241992	-0.00163635	0.0169942	0.000959351	0.0180421	-0.0515859	0.015529	0.0113841	0.0407816
-4.85952	-0.073684	-0.0262001	0.142541	0.12061	-0.00251813	-0.10266	-0.0267035	0.0601812	-0.0912544	-0.0408329	-0.0577129	0.00522241	-0.0494834	-0.0241955	-0.00161345	0.0169824	0.000949518	0.0180487	-0.0515717	0.0155348	0.0113925	0.0407966
-4.85904	-0.0737075	-0.0261879	0.142567	0.120619	-0.00248338	-0.102704	-0.02669	0.0601828	-0.0912375	-0.0407983	-0.0576651	0.00520444	-0.049473	-0.0241917	-0.00159059	0.0169706	0.000939698	0.0180554	-0.0515575	0.0155405	0.0114008	0.0408117
-4.85856	-0.073731	-0.0261756	0.142593	0.120629	-0.0024486	-0.102747	-0.0266766	0.0601843	-0.0912207	-0.0407637	-0.0576172	0.0051865	-0.0494625	-0.0241879	-0.00156773	0.0169588	0.000929893	0.018062	-0.0515432	0.0155462	0.0114091	0.0408267
-4.85808	-0.0737545	-0.0261633	0.14262	0.120639	-0.0024138	-0.102791	-0.0266631	0.0601859	-0.0912038	-0.0407291	-0.0575694	0.00516859	-0.0494521	-0.024184	-0.0015449	0.016947	0.000920098	0.0180687	-0.051529	0.015552	0.0114174	0.0408417
-4.8576	-0.073778	-0.026151	0.142646	0.120648	-0.00237899	-0.102835	-0.0266496	0.0601875	-0.0911869	-0.0406945	-0.0575217	0.00515072	-0.0494417	-0.0241801	-0.00152207	0.0169352	0.000910313	0.0180753	-0.0515147	0.0155577	0.0114256	0.0408567
-4.85712	-0.0738016	-0.0261387	0.142672	0.120658	-0.00234417	-0.102879	-0.0266362	0.0601891	-0.09117	-0.0406599	-0.0574739	0.00513287	-0.0494312	-0.0241762	-0.00149928	0.0169234	0.000900534	0.0180819	-0.0515004	0.0155634	0.0114339	0.0408716
-4.85664	-0.0738252	-0.0261264	0.142698	0.120668	-0.00230932	-0.102922	-0.0266227	0.0601907	-0.0911531	-0.0406253	-0.0574262	0.00511507	-0.0494208	-0.0241722	-0.00147649	0.0169116	0.000890772	0.0180885	-0.0514862	0.0155691	0.0114421	0.0408866
-4.85616	-0.0738489	-0.0261141	0.142724	0.120677	-0.00227446	-0.102966	-0.0266092	0.0601923	-0.0911362	-0.0405907	-0.0573785	0.00509727	-0.0494103	-0.0241682	-0.00145374	0.0168999	0.000881027	0.0180951	-0.0514719	0.0155747	0.0114503	0.0409015
-4.85568	-0.0738725	-0.0261017	0.14275	0.120687	-0.00223959	-0.10301	-0.0265957	0.0601939	-0.0911192	-0.0405561	-0.0573308	0.00507952	-0.0493999	-0.0241642	-0.001431	0.0168881	0.000871286	0.0181017	-0.0514576	0.0155804	0.0114585	0.0409164
-4.8552	-0.0738962	-0.0260894	0.142776	0.120696	-0.00220469	-0.103054	-0.0265823	0.0601955	-0.0911023	-0.0405214	-0.0572832	0.00506181	-0.0493894	-0.0241602	-0.00140828	0.0168764	0.000861567	0.0181083	-0.0514434	0.0155861	0.0114667	0.0409312
-4.85472	-0.07392	-0.026077	0.142802	0.120706	-0.00216977	-0.103098	-0.0265688	0.0601972	-0.0910853	-0.0404868	-0.0572355	0.00504411	-0.049379	-0.0241561	-0.00138558	0.0168646	0.00085185	0.0181148	-0.0514291	0.0155917	0.0114748	0.0409461
-4.85424	-0.0739439	-0.0260647	0.142828	0.120715	-0.00213486	-0.103142	-0.0265553	0.0601988	-0.0910683	-0.0404521	-0.0571879	0.00502646	-0.0493685	-0.024152	-0.00136291	0.0168529	0.000842158	0.0181214	-0.0514148	0.0155974	0.011483	0.0409609
-4.85376	-0.0739679	-0.0260522	0.142854	0.120725	-0.00209991	-0.103186	-0.0265418	0.0602005	-0.0910514	-0.0404175	-0.0571404	0.00500881	-0.0493581	-0.0241479	-0.00134024	0.0168412	0.000832471	0.018128	-0.0514005	0.015603	0.0114911	0.0409757
-4.85328	-0.0739918	-0.0260398	0.14288	0.120734	-0.00206495	-0.10323	-0.0265283	0.0602022	-0.0910344	-0.0403828	-0.0570928	0.00499123	-0.0493476	-0.0241438	-0.0013176	0.0168295	0.000822803	0.0181345	-0.0513861	0.0156086	0.0114992	0.0409905
-4.8528	-0.0740158	-0.0260274	0.142906	0.120744	-0.00202998	-0.103274	-0.0265149	0.0602038	-0.0910173	-0.0403482	-0.0570453	0.00497366	-0.0493372	-0.0241396	-0.00129497	0.0168178	0.000813152	0.0181411	-0.0513719	0.0156142	0.0115073	0.0410053
-4.85232	-0.0740398	-0.0260149	0.142932	0.120753	-0.00199499	-0.103318	-0.0265014	0.0602055	-0.0910003	-0.0403135	-0.0569978	0.00495612	-0.0493267	-0.0241355	-0.00127238	0.0168061	0.000803502	0.0181476	-0.0513575	0.0156198	0.0115154	0.04102
-4.85184	-0.0740639	-0.0260025	0.142958	0.120763	-0.00195998	-0.103363	-0.0264879	0.0602072	-0.0909833	-0.0402789	-0.0569503	0.00493859	-0.0493162	-0.0241312	-0.00124979	0.0167944	0.00079387	0.0181542	-0.0513433	0.0156254	0.0115234	0.0410347
-4.85136	-0.0740879	-0.02599	0.142984	0.120772	-0.00192495	-0.103407	-0.0264744	0.0602089	-0.0909662	-0.0402442	-0.0569029	0.00492109	-0.0493058	-0.024127	-0.00122723	0.0167827	0.000784244	0.0181607	-0.0513289	0.015631	0.0115314	0.0410494
-4.85088	-0.074112	-0.0259775	0.14301	0.120782	-0.00188992	-0.103451	-0.026461	0.0602106	-0.0909491	-0.0402095	-0.0568555	0.0049036	-0.0492953	-0.0241228	-0.00120467	0.016771	0.000774627	0.0181672	-0.0513146	0.0156365	0.0115395	0.0410641
-4.8504	-0.0741362	-0.025965	0.143036	0.120791	-0.00185486	-0.103496	-0.0264475	0.0602123	-0.090932	-0.0401748	-0.0568081	0.00488616	-0.0492849	-0.0241185	-0.00118216	0.0167594	0.000765025	0.0181738	-0.0513003	0.0156421	0.0115475	0.0410788
-4.84992	-0.0741603	-0.0259525	0.143062	0.120801	-0.00181979	-0.10354	-0.026434	0.0602141	-0.0909149	-0.0401402	-0.0567608	0.00486872	-0.0492744	-0.0241142	-0.00115964	0.0167477	0.000755438	0.0181803	-0.051286	0.0156477	0.0115555	0.0410934
-4.84944	-0.0741845	-0.0259399	0.143088	0.12081	-0.00178471	-0.103585	-0.0264205	0.0602158	-0.0908978	-0.0401055	-0.0567135	0.00485131	-0.049264	-0.0241099	-0.00113716	0.0167361	0.000745852	0.0181868	-0.0512716	0.0156532	0.0115634	0.041108
-4.84896	-0.0742087	-0.0259273	0.143113	0.120819	-0.00174961	-0.103629	-0.0264071	0.0602175	-0.0908807	-0.0400709	-0.0566662	0.00483393	-0.0492535	-0.0241056	-0.0011147	0.0167244	0.000736289	0.0181933	-0.0512573	0.0156588	0.0115714	0.0411226
-4.84848	-0.0742328	-0.0259147	0.143139	0.120829	-0.00171449	-0.103674	-0.0263936	0.0602193	-0.0908636	-0.0400362	-0.0566189	0.00481659	-0.0492431	-0.0241013	-0.00109228	0.0167128	0.00072673	0.0181998	-0.051243	0.0156643	0.0115793	0.0411372
-4.848	-0.0742571	-0.0259021	0.143165	0.120838	-0.00167937	-0.103719	-0.0263801	0.0602211	-0.0908464	-0.0400015	-0.0565717	0.00479928	-0.0492326	-0.0240969	-0.00106984	0.0167012	0.000717172	0.0182064	-0.0512287	0.0156698	0.0115873	0.0411517
-4.84752	-0.0742813	-0.0258895	0.143191	0.120847	-0.00164422	-0.103763	-0.0263666	0.0602228	-0.0908292	-0.0399668	-0.0565245	0.00478201	-0.0492222	-0.0240925	-0.00104745	0.0166896	0.000707636	0.0182129	-0.0512143	0.0156754	0.0115952	0.0411662
-4.84704	-0.0743055	-0.0258769	0.143217	0.120857	-0.00160905	-0.103808	-0.0263532	0.0602246	-0.0908121	-0.0399322	-0.0564773	0.00476476	-0.0492117	-0.0240881	-0.00102508	0.016678	0.000698103	0.0182193	-0.0512	0.0156809	0.011603	0.0411807
-4.84656	-0.0743297	-0.0258642	0.143242	0.120866	-0.00157388	-0.103853	-0.0263397	0.0602264	-0.0907949	-0.0398975	-0.0564302	0.00474755	-0.0492013	-0.0240837	-0.00100273	0.0166665	0.00068859	0.0182258	-0.0511856	0.0156864	0.0116109	0.0411951
-4.84608	-0.0743539	-0.0258516	0.143268	0.120875	-0.00153869	-0.103898	-0.0263262	0.0602282	-0.0907777	-0.0398628	-0.0563831	0.00473038	-0.0491908	-0.0240792	-0.00098038	0.0166549	0.000679083	0.0182323	-0.0511712	0.0156919	0.0116187	0.0412096
-4.8456	-0.0743782	-0.0258389	0.143294	0.120884	-0.00150349	-0.103943	-0.0263127	0.06023	-0.0907605	-0.0398281	-0.056336	0.00471324	-0.0491804	-0.0240748	-0.000958078	0.0166434	0.000669592	0.0182388	-0.0511568	0.0156974	0.0116266	0.041224
-4.84512	-0.0744025	-0.0258262	0.143319	0.120893	-0.00146827	-0.103988	-0.0262992	0.0602318	-0.0907432	-0.0397934	-0.056289	0.00469615	-0.0491699	-0.0240703	-0.000935767	0.0166319	0.000660112	0.0182453	-0.0511425	0.0157028	0.0116344	0.0412383
-4.84464	-0.0744267	-0.0258134	0.143345	0.120903	-0.00143304	-0.104033	-0.0262857	0.0602337	-0.090726	-0.0397588	-0.056242	0.00467904	-0.0491595	-0.0240657	-0.000913497	0.0166204	0.000650643	0.0182518	-0.0511281	0.0157083	0.0116422	0.0412527
-4.84416	-0.0744511	-0.0258007	0.143371	0.120912	-0.00139779	-0.104079	-0.0262722	0.0602355	-0.0907087	-0.0397241	-0.056195	0.00466196	-0.049149	-0.0240612	-0.000891237	0.0166089	0.000641191	0.0182583	-0.0511137	0.0157138	0.0116499	0.041267
-4.84368	-0.0744756	-0.025788	0.143396	0.120921	-0.00136252	-0.104124	-0.0262586	0.0602374	-0.0906914	-0.0396894	-0.056148	0.00464494	-0.0491386	-0.0240566	-0.000869006	0.0165974	0.000631745	0.0182648	-0.0510993	0.0157192	0.0116577	0.0412813
-4.8432	-0.0745	-0.0257752	0.143422	0.12093	-0.00132724	-0.104169	-0.0262451	0.0602392	-0.0906742	-0.0396547	-0.0561011	0.00462791	-0.0491281	-0.024052	-0.000846772	0.016586	0.000622321	0.0182712	-0.0510849	0.0157246	0.0116654	0.0412956
-4.84272	-0.0745244	-0.0257624	0.143448	0.120939	-0.00129195	-0.104215	-0.0262316	0.0602411	-0.0906568	-0.03962	-0.0560543	0.00461095	-0.0491176	-0.0240474	-0.000824583	0.0165746	0.000612908	0.0182777	-0.0510705	0.0157301	0.0116732	0.0413099
-4.84224	-0.0745489	-0.0257496	0.143473	0.120948	-0.00125665	-0.10426	-0.026218	0.060243	-0.0906395	-0.0395853	-0.0560074	0.00459398	-0.0491071	-0.0240428	-0.000802391	0.0165632	0.000603509	0.0182842	-0.0510561	0.0157355	0.0116809	0.0413241
-4.84176	-0.0745733	-0.0257368	0.143499	0.120957	-0.00122132	-0.104305	-0.0262045	0.0602449	-0.0906222	-0.0395506	-0.0559606	0.00457707	-0.0490967	-0.0240381	-0.000780244	0.0165518	0.000594119	0.0182906	-0.0510417	0.0157409	0.0116885	0.0413383
-4.84128	-0.0745978	-0.025724	0.143524	0.120967	-0.00118599	-0.104351	-0.0261909	0.0602468	-0.0906048	-0.0395159	-0.0559138	0.00456017	-0.0490862	-0.0240334	-0.000758101	0.0165404	0.000584751	0.0182971	-0.0510273	0.0157463	0.0116962	0.0413525
-4.8408	-0.0746222	-0.0257112	0.14355	0.120976	-0.00115064	-0.104397	-0.0261774	0.0602487	-0.0905874	-0.0394812	-0.055867	0.0045433	-0.0490757	-0.0240288	-0.000735988	0.0165291	0.00057539	0.0183036	-0.0510128	0.0157516	0.0117039	0.0413666
-4.84032	-0.0746467	-0.0256983	0.143575	0.120985	-0.00111527	-0.104442	-0.0261638	0.0602506	-0.09057	-0.0394464	-0.0558202	0.00452644	-0.0490653	-0.024024	-0.000713879	0.0165178	0.000566047	0.01831	-0.0509984	0.015757	0.0117115	0.0413808
-4.83984	-0.0746712	-0.0256855	0.143601	0.120994	-0.00107989	-0.104488	-0.0261502	0.0602526	-0.0905526	-0.0394117	-0.0557734	0.00450961	-0.0490548	-0.0240193	-0.000691823	0.0165065	0.000556721	0.0183165	-0.050984	0.0157624	0.0117191	0.0413949
-4.83936	-0.0746956	-0.0256726	0.143626	0.121003	-0.0010445	-0.104534	-0.0261367	0.0602545	-0.0905352	-0.039377	-0.0557267	0.00449277	-0.0490443	-0.0240146	-0.00066977	0.0164952	0.000547406	0.0183229	-0.0509696	0.0157678	0.0117267	0.041409
-4.83888	-0.0747201	-0.0256597	0.143652	0.121012	-0.00100909	-0.10458	-0.0261231	0.0602565	-0.0905177	-0.0393423	-0.0556799	0.00447599	-0.0490338	-0.0240098	-0.000647765	0.016484	0.000538105	0.0183294	-0.0509552	0.0157731	0.0117343	0.041423
-4.8384	-0.0747446	-0.0256468	0.143677	0.121021	-0.000973674	-0.104626	-0.0261095	0.0602584	-0.0905002	-0.0393076	-0.0556332	0.0044592	-0.0490234	-0.0240051	-0.000625742	0.0164727	0.00052882	0.0183358	-0.0509408	0.0157785	0.0117418	0.041437
-4.83792	-0.0747691	-0.0256339	0.143703	0.12103	-0.000938239	-0.104672	-0.0260959	0.0602604	-0.0904827	-0.0392728	-0.0555865	0.00444244	-0.0490129	-0.0240003	-0.000603757	0.0164615	0.000519545	0.0183423	-0.0509264	0.0157838	0.0117494	0.041451
-4.83744	-0.0747936	-0.0256209	0.143728	0.121039	-0.000902783	-0.104718	-0.0260823	0.0602624	-0.0904652	-0.0392381	-0.0555398	0.00442569	-0.0490024	-0.0239955	-0.000581774	0.0164503	0.000510292	0.0183487	-0.050912	0.0157892	0.0117569	0.041465
-4.83696	-0.0748181	-0.025608	0.143753	0.121047	-0.000867311	-0.104764	-0.0260686	0.0602644	-0.0904477	-0.0392034	-0.0554931	0.004409	-0.048992	-0.0239907	-0.00055984	0.0164392	0.000501059	0.0183551	-0.0508975	0.0157945	0.0117644	0.041479
-4.83648	-0.0748426	-0.0255951	0.143779	0.121056	-0.000831846	-0.10481	-0.026055	0.0602664	-0.0904301	-0.0391686	-0.0554464	0.00439231	-0.0489815	-0.0239858	-0.000537897	0.016428	0.000491831	0.0183616	-0.0508831	0.0157998	0.0117719	0.0414929
-4.836	-0.074867	-0.0255821	0.143804	0.121065	-0.000796362	-0.104857	-0.0260414	0.0602684	-0.0904125	-0.0391339	-0.0553998	0.00437565	-0.048971	-0.023981	-0.000515997	0.0164169	0.000482621	0.018368	-0.0508686	0.0158051	0.0117794	0.0415068
-4.83552	-0.0748914	-0.0255691	0.143829	0.121074	-0.000760858	-0.104903	-0.0260278	0.0602704	-0.090395	-0.0390991	-0.0553531	0.00435903	-0.0489605	-0.0239761	-0.000494096	0.0164058	0.000473436	0.0183745	-0.0508542	0.0158104	0.0117868	0.0415207
-4.83504	-0.0749158	-0.0255561	0.143854	0.121083	-0.000725335	-0.104949	-0.0260142	0.0602724	-0.0903773	-0.0390644	-0.0553065	0.00434241	-0.04895	-0.0239712	-0.000472233	0.0163947	0.000464265	0.0183809	-0.0508397	0.0158157	0.0117942	0.0415345
-4.83456	-0.0749402	-0.0255431	0.14388	0.121092	-0.00068982	-0.104996	-0.0260006	0.0602745	-0.0903597	-0.0390296	-0.05526	0.00432582	-0.0489395	-0.0239663	-0.000450366	0.0163836	0.000455096	0.0183873	-0.0508253	0.015821	0.0118016	0.0415484
-4.83408	-0.0749645	-0.0255301	0.143905	0.121101	-0.000654269	-0.105042	-0.0259869	0.0602765	-0.090342	-0.0389948	-0.0552134	0.00430926	-0.048929	-0.0239614	-0.000428548	0.0163726	0.000445952	0.0183938	-0.0508108	0.0158263	0.011809	0.0415622
-4.8336	-0.0749888	-0.0255171	0.14393	0.12111	-0.000618709	-0.105089	-0.0259733	0.0602786	-0.0903243	-0.03896	-0.0551668	0.00429272	-0.0489186	-0.0239564	-0.000406729	0.0163615	0.000436827	0.0184002	-0.0507963	0.0158315	0.0118164	0.041576
-4.83312	-0.075013	-0.0255041	0.143955	0.121119	-0.000583142	-0.105135	-0.0259597	0.0602806	-0.0903066	-0.0389252	-0.0551203	0.00427619	-0.0489081	-0.0239515	-0.00038495	0.0163505	0.000427706	0.0184066	-0.0507818	0.0158368	0.0118238	0.0415897
-4.83264	-0.0750373	-0.0254911	0.14398	0.121127	-0.000547561	-0.105182	-0.025946	0.0602827	-0.0902889	-0.0388904	-0.0550738	0.00425969	-0.0488976	-0.0239465	-0.000363186	0.0163396	0.000418597	0.0184131	-0.0507674	0.0158421	0.0118311	0.0416035
-4.83216	-0.0750615	-0.025478	0.144006	0.121136	-0.000511962	-0.105228	-0.0259324	0.0602848	-0.0902712	-0.0388557	-0.0550273	0.00424321	-0.0488871	-0.0239415	-0.00034144	0.0163286	0.0004095	0.0184195	-0.0507529	0.0158473	0.0118384	0.0416172
-4.83168	-0.0750858	-0.025465	0.144031	0.121145	-0.000476344	-0.105275	-0.0259188	0.0602869	-0.0902534	-0.0388209	-0.0549809	0.00422674	-0.0488766	-0.0239364	-0.000319709	0.0163177	0.000400422	0.0184259	-0.0507384	0.0158526	0.0118457	0.0416309
-4.8312	-0.07511	-0.0254519	0.144056	0.121153	-0.000440716	-0.105321	-0.0259051	0.060289	-0.0902356	-0.0387861	-0.0549345	0.0042103	-0.0488661	-0.0239314	-0.000298018	0.0163068	0.000391354	0.0184324	-0.0507239	0.0158578	0.011853	0.0416446
-4.83072	-0.0751342	-0.0254389	0.144081	0.121162	-0.000405081	-0.105368	-0.0258915	0.0602911	-0.0902178	-0.0387513	-0.054888	0.00419387	-0.0488557	-0.0239263	-0.000276333	0.0162959	0.000382303	0.0184389	-0.0507093	0.015863	0.0118603	0.0416582
-4.83024	-0.0751583	-0.0254258	0.144106	0.121171	-0.000369429	-0.105415	-0.0258779	0.0602932	-0.0902	-0.0387165	-0.0548416	0.00417747	-0.0488452	-0.0239213	-0.000254666	0.0162851	0.000373255	0.0184453	-0.0506948	0.0158682	0.0118675	0.0416718
-4.82976	-0.0751823	-0.0254127	0.144131	0.121179	-0.000333751	-0.105462	-0.0258642	0.0602954	-0.0901822	-0.0386817	-0.0547952	0.00416108	-0.0488347	-0.0239162	-0.000233021	0.0162743	0.000364223	0.0184518	-0.0506803	0.0158734	0.0118748	0.0416854
-4.82928	-0.0752063	-0.0253996	0.144156	0.121188	-0.000298064	-0.105509	-0.0258506	0.0602975	-0.0901644	-0.0386469	-0.0547489	0.00414472	-0.0488242	-0.0239111	-0.000211412	0.0162635	0.000355199	0.0184582	-0.0506658	0.0158786	0.011882	0.041699
-4.8288	-0.0752302	-0.0253865	0.144181	0.121196	-0.000262368	-0.105556	-0.0258369	0.0602997	-0.0901466	-0.0386121	-0.0547025	0.00412838	-0.0488137	-0.023906	-0.000189788	0.0162528	0.000346194	0.0184647	-0.0506512	0.0158838	0.0118892	0.0417126
-4.82832	-0.0752542	-0.0253734	0.144206	0.121205	-0.000226644	-0.105603	-0.0258233	0.0603019	-0.0901287	-0.0385773	-0.0546562	0.00411206	-0.0488032	-0.0239008	-0.000168229	0.0162421	0.00033719	0.0184711	-0.0506367	0.015889	0.0118964	0.0417261
-4.82784	-0.075278	-0.0253603	0.14423	0.121213	-0.000190912	-0.10565	-0.0258096	0.060304	-0.0901108	-0.0385425	-0.0546099	0.00409575	-0.0487927	-0.0238957	-0.000146646	0.0162313	0.000328207	0.0184776	-0.0506221	0.0158941	0.0119036	0.0417396
-4.82736	-0.0753019	-0.0253471	0.144255	0.121221	-0.000155165	-0.105697	-0.025796	0.0603062	-0.0900929	-0.0385077	-0.0545637	0.00407949	-0.0487822	-0.0238905	-0.000125113	0.0162207	0.000319236	0.0184841	-0.0506076	0.0158993	0.0119107	0.0417531
-4.82688	-0.0753257	-0.0253339	0.14428	0.12123	-0.000119398	-0.105745	-0.0257823	0.0603084	-0.0900751	-0.0384729	-0.0545174	0.00406322	-0.0487718	-0.0238853	-0.000103575	0.01621	0.000310273	0.0184906	-0.050593	0.0159044	0.0119178	0.0417665
-4.8264	-0.0753494	-0.0253207	0.144305	0.121238	-8.36137e-05	-0.105792	-0.0257686	0.0603106	-0.0900571	-0.0384381	-0.0544712	0.004047	-0.0487613	-0.0238802	-8.2095e-05	0.0161994	0.000301317	0.018497	-0.0505784	0.0159095	0.011925	0.0417799
-4.82592	-0.0753732	-0.0253076	0.14433	0.121246	-4.78185e-05	-0.105839	-0.025755	0.0603129	-0.0900392	-0.0384033	-0.054425	0.00403079	-0.0487508	-0.0238749	-6.06038e-05	0.0161888	0.000292379	0.0185035	-0.0505639	0.0159146	0.0119321	0.0417933
-4.82544	-0.0753969	-0.0252943	0.144354	0.121255	-1.20041e-05	-0.105887	-0.0257413	0.0603151	-0.0900213	-0.0383686	-0.0543789	0.00401463	-0.0487403	-0.0238697	-3.91574e-05	0.0161782	0.000283454	0.01851	-0.0505493	0.0159197	0.0119391	0.0418067
-4.82496	-0.0754207	-0.0252811	0.144379	0.121263	2.38189e-05	-0.105934	-0.0257276	0.0603173	-0.0900034	-0.0383338	-0.0543327	0.00399848	-0.0487298	-0.0238645	-1.77141e-05	0.0161677	0.000274541	0.0185165	-0.0505347	0.0159248	0.0119462	0.04182
-4.82448	-0.0754443	-0.0252679	0.144404	0.121271	5.96667e-05	-0.105982	-0.0257139	0.0603196	-0.0899854	-0.038299	-0.0542866	0.00398239	-0.0487193	-0.0238592	3.70437e-06	0.0161572	0.000265642	0.018523	-0.0505202	0.0159298	0.0119532	0.0418333
-4.824	-0.075468	-0.0252546	0.144429	0.121279	9.5526e-05	-0.10603	-0.0257002	0.0603218	-0.0899674	-0.0382642	-0.0542405	0.00396629	-0.0487088	-0.023854	2.5109e-05	0.0161467	0.000256756	0.0185295	-0.0505056	0.0159349	0.0119603	0.0418466
-4.82352	-0.0754916	-0.0252414	0.144453	0.121287	0.000131411	-0.106077	-0.0256865	0.0603241	-0.0899495	-0.0382293	-0.0541945	0.00395023	-0.0486984	-0.0238487	4.64826e-05	0.0161362	0.000247874	0.018536	-0.050491	0.0159399	0.0119673	0.0418598
-4.82304	-0.0755153	-0.0252281	0.144478	0.121295	0.000167299	-0.106125	-0.0256728	0.0603264	-0.0899315	-0.0381945	-0.0541484	0.0039342	-0.0486879	-0.0238434	6.78624e-05	0.0161258	0.000239	0.0185426	-0.0504764	0.015945	0.0119743	0.041873
-4.82256	-0.075539	-0.0252148	0.144503	0.121303	0.000203212	-0.106173	-0.0256591	0.0603286	-0.0899135	-0.0381597	-0.0541024	0.00391822	-0.0486774	-0.0238381	8.92036e-05	0.0161154	0.000230143	0.0185491	-0.0504619	0.01595	0.0119813	0.0418862
-4.82208	-0.0755627	-0.0252015	0.144527	0.121311	0.00023914	-0.106221	-0.0256454	0.0603309	-0.0898954	-0.0381249	-0.0540564	0.00390226	-0.0486669	-0.0238328	0.000110528	0.016105	0.000221284	0.0185556	-0.0504473	0.015955	0.0119883	0.0418994
-4.8216	-0.0755863	-0.0251882	0.144552	0.121319	0.000275083	-0.106269	-0.0256316	0.0603332	-0.0898774	-0.0380901	-0.0540105	0.00388634	-0.0486564	-0.0238275	0.000131839	0.0160947	0.00021244	0.0185622	-0.0504328	0.01596	0.0119952	0.0419125
-4.82112	-0.07561	-0.0251749	0.144576	0.121327	0.000311053	-0.106317	-0.0256179	0.0603356	-0.0898594	-0.0380553	-0.0539645	0.00387045	-0.0486459	-0.0238222	0.000153111	0.0160844	0.000203613	0.0185687	-0.0504182	0.0159651	0.0120022	0.0419257
-4.82064	-0.0756337	-0.0251616	0.144601	0.121335	0.000347025	-0.106366	-0.0256042	0.0603379	-0.0898413	-0.0380205	-0.0539186	0.00385461	-0.0486355	-0.0238169	0.000174376	0.0160741	0.000194794	0.0185753	-0.0504036	0.0159701	0.0120091	0.0419387
-4.82016	-0.0756574	-0.0251482	0.144625	0.121343	0.000383033	-0.106414	-0.0255905	0.0603402	-0.0898232	-0.0379857	-0.0538726	0.00383877	-0.048625	-0.0238115	0.000195618	0.0160638	0.000185979	0.0185818	-0.0503891	0.0159751	0.012016	0.0419518
-4.81968	-0.0756811	-0.0251348	0.14465	0.12135	0.000419043	-0.106462	-0.0255768	0.0603425	-0.0898051	-0.0379509	-0.0538267	0.003823	-0.0486145	-0.0238062	0.000216823	0.0160536	0.00017718	0.0185884	-0.0503745	0.0159801	0.0120229	0.0419648
-4.8192	-0.0757048	-0.0251215	0.144675	0.121358	0.000455079	-0.10651	-0.0255631	0.0603449	-0.089787	-0.0379161	-0.0537808	0.00380727	-0.048604	-0.0238008	0.000238024	0.0160434	0.000168381	0.018595	-0.0503599	0.0159851	0.0120298	0.0419778
-4.81872	-0.0757285	-0.0251081	0.144699	0.121366	0.000491129	-0.106559	-0.0255493	0.0603473	-0.0897689	-0.0378813	-0.0537349	0.00379155	-0.0485935	-0.0237955	0.000259198	0.0160332	0.0001596	0.0186015	-0.0503453	0.01599	0.0120367	0.0419908
-4.81824	-0.0757523	-0.0250947	0.144723	0.121374	0.000527204	-0.106607	-0.0255356	0.0603497	-0.0897508	-0.0378465	-0.0536891	0.00377587	-0.048583	-0.0237901	0.000280344	0.016023	0.000150831	0.0186081	-0.0503307	0.015995	0.0120435	0.0420038
-4.81776	-0.075776	-0.0250813	0.144748	0.121382	0.000563286	-0.106656	-0.0255219	0.060352	-0.0897326	-0.0378117	-0.0536432	0.00376023	-0.0485726	-0.0237847	0.000301472	0.0160129	0.000142062	0.0186147	-0.0503161	0.016	0.0120504	0.0420167
-4.81728	-0.0757997	-0.0250679	0.144772	0.121389	0.000599383	-0.106705	-0.0255082	0.0603545	-0.0897145	-0.0377769	-0.0535974	0.0037446	-0.0485621	-0.0237793	0.000322594	0.0160028	0.000133314	0.0186213	-0.0503015	0.016005	0.0120572	0.0420296
-4.8168	-0.0758234	-0.0250545	0.144797	0.121397	0.000635495	-0.106753	-0.0254944	0.0603569	-0.0896963	-0.0377421	-0.0535516	0.00372899	-0.0485516	-0.0237739	0.000343694	0.0159927	0.000124564	0.0186279	-0.050287	0.0160099	0.012064	0.0420425
-4.81632	-0.0758472	-0.0250411	0.144821	0.121404	0.000671616	-0.106802	-0.0254807	0.0603593	-0.0896781	-0.0377073	-0.0535057	0.00371341	-0.0485411	-0.0237685	0.000364777	0.0159826	0.000115833	0.0186344	-0.0502724	0.0160149	0.0120708	0.0420553
-4.81584	-0.0758709	-0.0250276	0.144845	0.121412	0.000707756	-0.106851	-0.0254669	0.0603618	-0.0896599	-0.0376725	-0.0534599	0.00369786	-0.0485306	-0.023763	0.00038583	0.0159725	0.000107108	0.018641	-0.0502578	0.0160198	0.0120776	0.0420681
-4.81536	-0.0758947	-0.0250141	0.14487	0.12142	0.000743911	-0.1069	-0.0254531	0.0603642	-0.0896416	-0.0376377	-0.0534141	0.00368234	-0.0485201	-0.0237576	0.000406884	0.0159625	9.83938e-05	0.0186476	-0.0502432	0.0160248	0.0120843	0.0420809
-4.81488	-0.0759184	-0.0250006	0.144894	0.121427	0.00078009	-0.106949	-0.0254393	0.0603667	-0.0896234	-0.0376029	-0.0533683	0.00366685	-0.0485096	-0.0237521	0.000427903	0.0159525	8.96782e-05	0.0186542	-0.0502286	0.0160297	0.012091	0.0420937
-4.8144	-0.0759422	-0.0249871	0.144918	0.121435	0.000816271	-0.106998	-0.0254255	0.0603691	-0.0896051	-0.0375681	-0.0533225	0.00365138	-0.0484991	-0.0237466	0.000448925	0.0159425	8.09757e-05	0.0186608	-0.050214	0.0160347	0.0120978	0.0421064
-4.81392	-0.0759659	-0.0249736	0.144943	0.121442	0.000852463	-0.107047	-0.0254117	0.0603716	-0.0895869	-0.0375332	-0.0532767	0.00363596	-0.0484886	-0.0237411	0.000469907	0.0159325	7.22816e-05	0.0186674	-0.0501994	0.0160396	0.0121045	0.0421191
-4.81344	-0.0759897	-0.0249601	0.144967	0.121449	0.000888676	-0.107096	-0.0253979	0.0603741	-0.0895686	-0.0374984	-0.0532309	0.00362055	-0.0484781	-0.0237356	0.000490885	0.0159225	6.36041e-05	0.018674	-0.0501849	0.0160445	0.0121112	0.0421318
-4.81296	-0.0760135	-0.0249466	0.144991	0.121457	0.000924894	-0.107145	-0.0253841	0.0603766	-0.0895503	-0.0374636	-0.0531852	0.00360519	-0.0484676	-0.0237301	0.000511842	0.0159126	5.49314e-05	0.0186806	-0.0501703	0.0160494	0.0121178	0.0421445
-4.81248	-0.0760372	-0.024933	0.145015	0.121464	0.000961138	-0.107195	-0.0253702	0.0603792	-0.089532	-0.0374287	-0.0531394	0.00358984	-0.048457	-0.0237245	0.000532789	0.0159027	4.62691e-05	0.0186873	-0.0501557	0.0160543	0.0121245	0.0421571
-4.812	-0.0760608	-0.0249194	0.145039	0.121472	0.000997388	-0.107244	-0.0253564	0.0603817	-0.0895136	-0.0373939	-0.0530936	0.00357451	-0.0484465	-0.0237189	0.000553703	0.0158928	3.76177e-05	0.0186939	-0.0501411	0.0160592	0.0121311	0.0421697
-4.81152	-0.0760844	-0.0249058	0.145064	0.121479	0.00103366	-0.107293	-0.0253425	0.0603842	-0.0894953	-0.0373591	-0.0530479	0.00355921	-0.048436	-0.0237133	0.000574619	0.0158829	2.89737e-05	0.0187005	-0.0501266	0.0160641	0.0121378	0.0421822
-4.81104	-0.0761081	-0.0248922	0.145088	0.121486	0.00106993	-0.107343	-0.0253287	0.0603867	-0.0894769	-0.0373242	-0.0530021	0.00354396	-0.0484255	-0.0237077	0.000595506	0.0158731	2.03469e-05	0.0187071	-0.050112	0.016069	0.0121444	0.0421948
-4.81056	-0.0761317	-0.0248785	0.145112	0.121494	0.00110624	-0.107393	-0.0253148	0.0603893	-0.0894586	-0.0372893	-0.0529563	0.00352875	-0.048415	-0.0237021	0.000616386	0.0158633	1.17211e-05	0.0187137	-0.0500974	0.0160739	0.012151	0.0422073
-4.81008	-0.0761551	-0.0248649	0.145136	0.121501	0.00114255	-0.107442	-0.0253009	0.0603919	-0.0894402	-0.0372545	-0.0529105	0.00351356	-0.0484044	-0.0236964	0.000637231	0.0158535	3.11624e-06	0.0187203	-0.0500828	0.0160787	0.0121576	0.0422198
-4.8096	-0.0761785	-0.0248512	0.14516	0.121508	0.00117888	-0.107492	-0.0252871	0.0603944	-0.0894218	-0.0372196	-0.0528647	0.00349841	-0.0483939	-0.0236907	0.000658103	0.0158437	-5.48552e-06	0.0187269	-0.0500683	0.0160836	0.0121641	0.0422322
-4.80912	-0.0762019	-0.0248374	0.145184	0.121516	0.00121523	-0.107542	-0.0252732	0.060397	-0.0894033	-0.0371847	-0.0528189	0.00348333	-0.0483834	-0.023685	0.000678924	0.015834	-1.40706e-05	0.0187336	-0.0500537	0.0160884	0.0121707	0.0422446
-4.80864	-0.0762252	-0.0248237	0.145208	0.121523	0.00125158	-0.107591	-0.0252593	0.0603996	-0.0893849	-0.0371498	-0.0527731	0.00346826	-0.0483728	-0.0236793	0.00069976	0.0158242	-2.26535e-05	0.0187402	-0.0500391	0.0160933	0.0121772	0.042257
-4.80816	-0.0762484	-0.0248099	0.145232	0.12153	0.00128796	-0.107641	-0.0252454	0.0604022	-0.0893664	-0.037115	-0.0527273	0.00345326	-0.0483623	-0.0236735	0.000720547	0.0158146	-3.12287e-05	0.0187468	-0.0500245	0.0160981	0.0121838	0.0422694
-4.80768	-0.0762717	-0.0247961	0.145256	0.121537	0.00132434	-0.107691	-0.0252315	0.0604048	-0.089348	-0.0370801	-0.0526815	0.00343828	-0.0483517	-0.0236678	0.000741359	0.0158049	-3.97845e-05	0.0187534	-0.0500099	0.016103	0.0121903	0.0422818
-4.8072	-0.076295	-0.0247823	0.14528	0.121544	0.00136074	-0.107741	-0.0252176	0.0604074	-0.0893295	-0.0370452	-0.0526357	0.00342334	-0.0483412	-0.023662	0.000762132	0.0157952	-4.83372e-05	0.01876	-0.0499953	0.0161078	0.0121968	0.0422941
-4.80672	-0.0763183	-0.0247684	0.145304	0.121552	0.00139715	-0.107791	-0.0252036	0.06041	-0.089311	-0.0370103	-0.0525899	0.00340844	-0.0483306	-0.0236561	0.000782921	0.0157856	-5.68883e-05	0.0187667	-0.0499807	0.0161127	0.0122033	0.0423064
-4.80624	-0.0763416	-0.0247545	0.145328	0.121559	0.00143357	-0.107841	-0.0251897	0.0604127	-0.0892925	-0.0369754	-0.0525441	0.00339361	-0.04832	-0.0236503	0.000803671	0.015776	-6.54258e-05	0.0187733	-0.049966	0.0161175	0.0122098	0.0423186
-4.80576	-0.0763648	-0.0247406	0.145352	0.121566	0.00147001	-0.107891	-0.0251757	0.0604153	-0.089274	-0.0369406	-0.0524983	0.00337881	-0.0483095	-0.0236444	0.000824429	0.0157664	-7.39519e-05	0.0187799	-0.0499514	0.0161223	0.0122162	0.0423309
-4.80528	-0.076388	-0.0247267	0.145376	0.121573	0.00150645	-0.107941	-0.0251618	0.060418	-0.0892554	-0.0369057	-0.0524525	0.00336407	-0.0482989	-0.0236385	0.000845169	0.0157569	-8.24743e-05	0.0187866	-0.0499368	0.0161271	0.0122227	0.0423431
-4.8048	-0.0764112	-0.0247127	0.1454	0.12158	0.00154291	-0.107991	-0.0251478	0.0604206	-0.0892369	-0.0368708	-0.0524067	0.00334933	-0.0482884	-0.0236326	0.000865893	0.0157474	-9.09842e-05	0.0187932	-0.0499222	0.0161319	0.0122291	0.0423553
-4.80432	-0.0764344	-0.0246987	0.145423	0.121587	0.00157938	-0.108042	-0.0251338	0.0604233	-0.0892183	-0.0368359	-0.0523609	0.00333468	-0.0482778	-0.0236267	0.000886601	0.0157378	-9.94894e-05	0.0187998	-0.0499075	0.0161367	0.0122356	0.0423675
-4.80384	-0.0764575	-0.0246846	0.145447	0.121594	0.00161587	-0.108092	-0.0251198	0.060426	-0.0891997	-0.036801	-0.0523151	0.00332005	-0.0482672	-0.0236207	0.000907307	0.0157284	-0.000107978	0.0188065	-0.0498929	0.0161415	0.012242	0.0423796
-4.80336	-0.0764806	-0.0246706	0.145471	0.121601	0.00165237	-0.108143	-0.0251058	0.0604287	-0.0891811	-0.0367661	-0.0522694	0.00330549	-0.0482567	-0.0236147	0.000927988	0.0157189	-0.000116466	0.0188131	-0.0498782	0.0161463	0.0122484	0.0423917
-4.80288	-0.0765037	-0.0246565	0.145495	0.121608	0.00168888	-0.108193	-0.0250917	0.0604314	-0.0891625	-0.0367312	-0.0522236	0.00329094	-0.0482461	-0.0236087	0.000948675	0.0157094	-0.000124942	0.0188197	-0.0498636	0.0161511	0.0122548	0.0424038
-4.8024	-0.0765267	-0.0246424	0.145518	0.121615	0.0017254	-0.108244	-0.0250777	0.0604341	-0.0891439	-0.0366964	-0.0521779	0.00327643	-0.0482355	-0.0236027	0.000969328	0.0157	-0.000133405	0.0188264	-0.0498489	0.0161559	0.0122611	0.0424158
-4.80192	-0.0765498	-0.0246283	0.145542	0.121622	0.00176194	-0.108294	-0.0250636	0.0604368	-0.0891253	-0.0366615	-0.0521321	0.00326193	-0.048225	-0.0235966	0.000989983	0.0156906	-0.00014187	0.018833	-0.0498343	0.0161607	0.0122675	0.0424279
-4.80144	-0.0765728	-0.0246141	0.145566	0.121629	0.00179848	-0.108345	-0.0250496	0.0604395	-0.0891066	-0.0366266	-0.0520864	0.00324752	-0.0482144	-0.0235905	0.00101063	0.0156812	-0.000150321	0.0188397	-0.0498196	0.0161655	0.0122738	0.0424399
-4.80096	-0.0765959	-0.0246	0.145589	0.121635	0.00183503	-0.108396	-0.0250355	0.0604422	-0.089088	-0.0365917	-0.0520407	0.0032331	-0.0482038	-0.0235844	0.00103126	0.0156719	-0.000158773	0.0188463	-0.049805	0.0161702	0.0122802	0.0424519
-4.80048	-0.076619	-0.0245858	0.145613	0.121642	0.00187161	-0.108446	-0.0250214	0.060445	-0.0890693	-0.0365568	-0.051995	0.00321875	-0.0481932	-0.0235782	0.00105187	0.0156625	-0.000167217	0.018853	-0.0497903	0.016175	0.0122865	0.0424638
-4.8	-0.0766421	-0.0245715	0.145637	0.121649	0.00190819	-0.108497	-0.0250074	0.0604477	-0.0890506	-0.0365219	-0.0519493	0.00320441	-0.0481827	-0.0235721	0.00107249	0.0156532	-0.000175646	0.0188596	-0.0497756	0.0161797	0.0122928	0.0424757
-4.79952	-0.0766652	-0.0245573	0.14566	0.121656	0.00194478	-0.108548	-0.0249933	0.0604504	-0.0890319	-0.036487	-0.0519036	0.00319011	-0.0481721	-0.0235659	0.00109308	0.0156439	-0.000184075	0.0188663	-0.0497609	0.0161845	0.0122991	0.0424876
-4.79904	-0.0766883	-0.024543	0.145684	0.121662	0.00198139	-0.108599	-0.0249792	0.0604532	-0.0890132	-0.0364521	-0.051858	0.00317582	-0.0481615	-0.0235596	0.00111367	0.0156346	-0.000192495	0.0188729	-0.0497462	0.0161892	0.0123054	0.0424995
-4.79856	-0.0767113	-0.0245287	0.145707	0.121669	0.002018	-0.10865	-0.0249651	0.060456	-0.0889945	-0.0364172	-0.0518123	0.00316156	-0.0481509	-0.0235534	0.00113426	0.0156254	-0.000200907	0.0188796	-0.0497315	0.016194	0.0123116	0.0425113
-4.79808	-0.0767344	-0.0245143	0.145731	0.121676	0.00205464	-0.108701	-0.024951	0.0604587	-0.0889758	-0.0363823	-0.0517666	0.00314731	-0.0481404	-0.0235472	0.00115484	0.0156161	-0.000209309	0.0188862	-0.0497169	0.0161987	0.0123179	0.0425231
-4.7976	-0.0767575	-0.0245	0.145754	0.121682	0.00209127	-0.108752	-0.0249369	0.0604615	-0.0889571	-0.0363474	-0.051721	0.00313311	-0.0481298	-0.0235409	0.00117541	0.0156069	-0.000217717	0.0188929	-0.0497021	0.0162034	0.0123241	0.0425349
-4.79712	-0.0767806	-0.0244856	0.145778	0.121689	0.00212793	-0.108803	-0.0249228	0.0604643	-0.0889383	-0.0363125	-0.0516754	0.0031189	-0.0481192	-0.0235346	0.00119599	0.0155978	-0.000226109	0.0188995	-0.0496874	0.0162082	0.0123304	0.0425467
-4.79664	-0.0768037	-0.0244712	0.145801	0.121696	0.0021646	-0.108854	-0.0249087	0.0604671	-0.0889195	-0.0362775	-0.0516298	0.00310475	-0.0481087	-0.0235283	0.00121654	0.0155886	-0.000234492	0.0189062	-0.0496727	0.0162129	0.0123366	0.0425584
-4.79616	-0.0768268	-0.0244567	0.145824	0.121702	0.00220129	-0.108905	-0.0248946	0.0604699	-0.0889007	-0.0362426	-0.0515841	0.00309059	-0.0480981	-0.023522	0.00123711	0.0155795	-0.000242872	0.0189128	-0.049658	0.0162176	0.0123428	0.0425701
-4.79568	-0.0768499	-0.0244423	0.145848	0.121709	0.00223798	-0.108957	-0.0248805	0.0604727	-0.0888819	-0.0362077	-0.0515385	0.0030765	-0.0480875	-0.0235157	0.00125767	0.0155703	-0.000251245	0.0189195	-0.0496433	0.0162224	0.012349	0.0425818
-4.7952	-0.076873	-0.0244278	0.145871	0.121715	0.0022747	-0.109008	-0.0248663	0.0604755	-0.0888631	-0.0361728	-0.0514928	0.00306242	-0.048077	-0.0235094	0.00127822	0.0155613	-0.0002596	0.0189261	-0.0496286	0.0162271	0.0123551	0.0425935
-4.79472	-0.0768962	-0.0244133	0.145894	0.121722	0.00231143	-0.109059	-0.0248522	0.0604783	-0.0888443	-0.0361379	-0.0514473	0.00304835	-0.0480664	-0.023503	0.00129877	0.0155522	-0.000267955	0.0189328	-0.0496139	0.0162318	0.0123613	0.0426051
-4.79424	-0.0769193	-0.0243988	0.145918	0.121728	0.00234818	-0.109111	-0.0248381	0.0604811	-0.0888254	-0.0361029	-0.0514016	0.00303431	-0.0480558	-0.0234967	0.00131931	0.0155431	-0.000276301	0.0189394	-0.0495991	0.0162365	0.0123675	0.0426167
-4.79376	-0.0769424	-0.0243842	0.145941	0.121735	0.00238493	-0.109162	-0.0248239	0.060484	-0.0888066	-0.036068	-0.051356	0.00302028	-0.0480453	-0.0234903	0.00133984	0.0155341	-0.00028464	0.0189461	-0.0495844	0.0162412	0.0123736	0.0426283
-4.79328	-0.0769655	-0.0243696	0.145964	0.121741	0.00242171	-0.109213	-0.0248097	0.0604868	-0.0887877	-0.0360331	-0.0513103	0.00300626	-0.0480347	-0.023484	0.00136036	0.0155251	-0.000292974	0.0189528	-0.0495696	0.0162459	0.0123797	0.0426398
-4.7928	-0.0769885	-0.024355	0.145987	0.121748	0.00245849	-0.109265	-0.0247955	0.0604896	-0.0887688	-0.0359981	-0.0512648	0.00299228	-0.0480242	-0.0234776	0.00138086	0.0155162	-0.000301298	0.0189594	-0.0495549	0.0162507	0.0123858	0.0426513
-4.79232	-0.0770115	-0.0243404	0.146011	0.121754	0.00249528	-0.109316	-0.0247813	0.0604925	-0.0887499	-0.0359632	-0.0512191	0.00297829	-0.0480136	-0.0234712	0.00140137	0.0155072	-0.00030962	0.0189661	-0.0495401	0.0162554	0.0123919	0.0426628
-4.79184	-0.0770344	-0.0243258	0.146034	0.12176	0.0025321	-0.109368	-0.024767	0.0604953	-0.088731	-0.0359282	-0.0511735	0.00296436	-0.048003	-0.0234648	0.00142185	0.0154983	-0.000317922	0.0189727	-0.0495253	0.01626	0.012398	0.0426742
-4.79136	-0.0770572	-0.0243111	0.146057	0.121767	0.00256893	-0.10942	-0.0247528	0.0604982	-0.0887121	-0.0358933	-0.0511279	0.0029504	-0.0479925	-0.0234584	0.00144234	0.0154894	-0.000326223	0.0189794	-0.0495106	0.0162647	0.012404	0.0426856
-4.79088	-0.0770799	-0.0242964	0.14608	0.121773	0.00260577	-0.109471	-0.0247386	0.0605011	-0.0886931	-0.0358583	-0.0510823	0.0029365	-0.0479819	-0.023452	0.0014628	0.0154805	-0.000334515	0.018986	-0.0494958	0.0162694	0.01241	0.042697
-4.7904	-0.0771026	-0.0242817	0.146103	0.121779	0.00264262	-0.109523	-0.0247243	0.060504	-0.0886742	-0.0358234	-0.0510367	0.0029226	-0.0479713	-0.0234457	0.00148326	0.0154717	-0.000342797	0.0189927	-0.049481	0.0162741	0.0124161	0.0427083
-4.78992	-0.0771253	-0.024267	0.146126	0.121786	0.00267949	-0.109575	-0.02471	0.0605068	-0.0886552	-0.0357884	-0.0509911	0.00290872	-0.0479608	-0.0234393	0.0015037	0.0154628	-0.000351072	0.0189994	-0.0494662	0.0162788	0.0124221	0.0427196
-4.78944	-0.077148	-0.0242523	0.146149	0.121792	0.00271637	-0.109626	-0.0246957	0.0605097	-0.0886362	-0.0357535	-0.0509455	0.00289484	-0.0479502	-0.0234329	0.00152415	0.015454	-0.000359338	0.019006	-0.0494514	0.0162835	0.0124281	0.0427309
-4.78896	-0.0771707	-0.0242375	0.146172	0.121798	0.00275328	-0.109678	-0.0246814	0.0605126	-0.0886173	-0.0357185	-0.0508999	0.002881	-0.0479396	-0.0234265	0.00154456	0.0154452	-0.000367591	0.0190127	-0.0494366	0.0162881	0.0124341	0.0427422
-4.78848	-0.0771934	-0.0242228	0.146195	0.121804	0.00279019	-0.10973	-0.0246671	0.0605155	-0.0885983	-0.0356836	-0.0508543	0.00286717	-0.047929	-0.0234201	0.001565	0.0154365	-0.000375845	0.0190193	-0.0494217	0.0162928	0.0124401	0.0427534
-4.788	-0.077216	-0.024208	0.146218	0.12181	0.00282711	-0.109782	-0.0246528	0.0605184	-0.0885793	-0.0356486	-0.0508088	0.00285337	-0.0479185	-0.0234137	0.0015854	0.0154277	-0.000384094	0.019026	-0.0494069	0.0162974	0.012446	0.0427646
-4.78752	-0.0772387	-0.0241932	0.146241	0.121816	0.00286406	-0.109834	-0.0246385	0.0605213	-0.0885603	-0.0356136	-0.0507632	0.00283958	-0.0479079	-0.0234073	0.00160582	0.015419	-0.000392328	0.0190326	-0.0493921	0.0163021	0.012452	0.0427757
-4.78704	-0.0772613	-0.0241783	0.146264	0.121822	0.002901	-0.109886	-0.0246241	0.0605243	-0.0885412	-0.0355787	-0.0507176	0.00282582	-0.0478973	-0.0234009	0.0016262	0.0154103	-0.000400556	0.0190393	-0.0493772	0.0163067	0.0124579	0.0427868
-4.78656	-0.077284	-0.0241635	0.146286	0.121828	0.00293797	-0.109938	-0.0246098	0.0605272	-0.0885222	-0.0355437	-0.0506721	0.00281208	-0.0478868	-0.0233945	0.0016466	0.0154016	-0.000408778	0.019046	-0.0493624	0.0163113	0.0124638	0.0427979
-4.78608	-0.0773065	-0.0241487	0.146309	0.121834	0.00297496	-0.109991	-0.0245954	0.0605301	-0.0885031	-0.0355088	-0.0506266	0.0027984	-0.0478762	-0.023388	0.00166698	0.015393	-0.000416998	0.0190526	-0.0493475	0.0163159	0.0124697	0.042809
-4.7856	-0.077329	-0.0241338	0.146332	0.12184	0.00301196	-0.110043	-0.024581	0.0605331	-0.0884841	-0.0354739	-0.050581	0.00278475	-0.0478657	-0.0233816	0.00168735	0.0153843	-0.000425206	0.0190593	-0.0493326	0.0163205	0.0124756	0.04282
-4.78512	-0.0773515	-0.0241189	0.146355	0.121846	0.00304896	-0.110095	-0.0245666	0.060536	-0.0884651	-0.0354389	-0.0505355	0.00277115	-0.0478551	-0.0233752	0.00170773	0.0153757	-0.000433404	0.019066	-0.0493177	0.0163251	0.0124815	0.042831
-4.78464	-0.077374	-0.024104	0.146378	0.121852	0.00308598	-0.110147	-0.0245522	0.060539	-0.088446	-0.035404	-0.05049	0.00275756	-0.0478446	-0.0233687	0.00172808	0.0153672	-0.000441605	0.0190726	-0.0493028	0.0163297	0.0124874	0.0428419
-4.78416	-0.0773964	-0.024089	0.1464	0.121858	0.00312301	-0.110199	-0.0245378	0.0605419	-0.0884269	-0.035369	-0.0504446	0.00274401	-0.047834	-0.0233622	0.00174843	0.0153586	-0.000449792	0.0190793	-0.0492879	0.0163343	0.0124932	0.0428528
-4.78368	-0.0774188	-0.0240741	0.146423	0.121864	0.00316004	-0.110252	-0.0245234	0.0605449	-0.0884079	-0.0353341	-0.0503991	0.00273048	-0.0478235	-0.0233557	0.00176877	0.0153501	-0.000457971	0.019086	-0.049273	0.0163388	0.012499	0.0428637
-4.7832	-0.0774413	-0.0240591	0.146446	0.12187	0.0031971	-0.110304	-0.024509	0.0605479	-0.0883888	-0.0352992	-0.0503536	0.00271698	-0.047813	-0.0233492	0.00178911	0.0153416	-0.000466139	0.0190927	-0.0492581	0.0163434	0.0125049	0.0428746
-4.78272	-0.0774637	-0.0240442	0.146468	0.121875	0.00323417	-0.110357	-0.0244946	0.0605509	-0.0883698	-0.0352642	-0.0503081	0.00270349	-0.0478024	-0.0233427	0.00180944	0.0153331	-0.000474303	0.0190994	-0.0492432	0.0163479	0.0125107	0.0428854
-4.78224	-0.0774861	-0.0240292	0.146491	0.121881	0.00327124	-0.110409	-0.0244801	0.0605539	-0.0883507	-0.0352293	-0.0502627	0.00269003	-0.0477919	-0.0233362	0.00182975	0.0153246	-0.000482455	0.0191061	-0.0492283	0.0163524	0.0125165	0.0428962
-4.78176	-0.0775085	-0.0240142	0.146513	0.121887	0.00330833	-0.110461	-0.0244656	0.0605569	-0.0883316	-0.0351944	-0.0502172	0.00267656	-0.0477814	-0.0233297	0.00185008	0.0153162	-0.000490602	0.0191128	-0.0492134	0.016357	0.0125222	0.0429069
-4.78128	-0.0775309	-0.0239991	0.146536	0.121892	0.00334543	-0.110514	-0.0244512	0.0605599	-0.0883125	-0.0351595	-0.0501718	0.00266312	-0.0477709	-0.0233231	0.00187037	0.0153078	-0.000498742	0.0191195	-0.0491984	0.0163615	0.012528	0.0429176
-4.7808	-0.0775534	-0.0239841	0.146558	0.121898	0.00338254	-0.110567	-0.0244367	0.0605629	-0.0882935	-0.0351245	-0.0501264	0.00264971	-0.0477604	-0.0233165	0.00189069	0.0152994	-0.00050688	0.0191262	-0.0491835	0.0163659	0.0125337	0.0429283
-4.78032	-0.077576	-0.0239691	0.146581	0.121903	0.00341966	-0.110619	-0.0244222	0.0605659	-0.0882744	-0.0350896	-0.0500809	0.00263635	-0.0477499	-0.0233099	0.00191096	0.015291	-0.000515003	0.0191329	-0.0491685	0.0163704	0.0125394	0.0429389
-4.77984	-0.0775986	-0.023954	0.146603	0.121909	0.00345681	-0.110672	-0.0244077	0.060569	-0.0882553	-0.0350547	-0.0500355	0.00262295	-0.0477394	-0.0233033	0.00193127	0.0152827	-0.000523119	0.0191396	-0.0491536	0.0163749	0.0125452	0.0429495
-4.77936	-0.0776212	-0.0239389	0.146626	0.121914	0.00349396	-0.110724	-0.0243932	0.060572	-0.0882362	-0.0350198	-0.0499901	0.00260964	-0.047729	-0.0232967	0.00195152	0.0152743	-0.000531232	0.0191463	-0.0491386	0.0163793	0.0125508	0.0429601
-4.77888	-0.0776438	-0.0239238	0.146648	0.12192	0.00353113	-0.110777	-0.0243786	0.060575	-0.0882171	-0.0349849	-0.0499447	0.00259629	-0.0477185	-0.0232901	0.00197179	0.0152661	-0.000539331	0.019153	-0.0491237	0.0163837	0.0125565	0.0429706
-4.7784	-0.0776664	-0.0239087	0.14667	0.121925	0.00356831	-0.11083	-0.0243641	0.060578	-0.088198	-0.03495	-0.0498993	0.00258302	-0.047708	-0.0232834	0.00199205	0.0152578	-0.00054742	0.0191597	-0.0491087	0.0163881	0.0125622	0.0429811
-4.77792	-0.0776891	-0.0238935	0.146693	0.12193	0.00360549	-0.110882	-0.0243495	0.0605811	-0.0881789	-0.0349151	-0.0498539	0.00256968	-0.0476976	-0.0232767	0.0020123	0.0152496	-0.000555508	0.0191663	-0.0490937	0.0163925	0.0125679	0.0429916
-4.77744	-0.0777116	-0.0238784	0.146715	0.121936	0.00364269	-0.110935	-0.0243349	0.0605842	-0.0881597	-0.0348802	-0.0498085	0.0025564	-0.0476871	-0.0232701	0.00203253	0.0152414	-0.000563582	0.019173	-0.0490787	0.0163969	0.0125735	0.043002
-4.77696	-0.0777343	-0.0238632	0.146737	0.121941	0.00367991	-0.110988	-0.0243204	0.0605872	-0.0881406	-0.0348453	-0.0497631	0.00254313	-0.0476766	-0.0232634	0.00205277	0.0152332	-0.000571646	0.0191797	-0.0490637	0.0164012	0.0125791	0.0430124
-4.77648	-0.0777569	-0.023848	0.146759	0.121946	0.00371713	-0.111041	-0.0243058	0.0605903	-0.0881215	-0.0348104	-0.0497176	0.00252989	-0.0476662	-0.0232566	0.002073	0.015225	-0.000579697	0.0191864	-0.0490487	0.0164055	0.0125847	0.0430228
-4.776	-0.0777796	-0.0238328	0.146782	0.121951	0.00375436	-0.111094	-0.0242912	0.0605934	-0.0881023	-0.0347756	-0.0496722	0.00251665	-0.0476557	-0.0232499	0.00209322	0.0152168	-0.000587744	0.0191931	-0.0490337	0.0164099	0.0125903	0.0430332
-4.77552	-0.0778021	-0.0238175	0.146804	0.121956	0.00379162	-0.111147	-0.0242766	0.0605965	-0.0880831	-0.0347407	-0.0496268	0.00250345	-0.0476453	-0.0232431	0.00211343	0.0152087	-0.000595781	0.0191998	-0.0490187	0.0164142	0.0125959	0.0430435
-4.77504	-0.0778247	-0.0238023	0.146826	0.121961	0.00382889	-0.1112	-0.024262	0.0605995	-0.088064	-0.0347058	-0.0495814	0.00249027	-0.0476349	-0.0232364	0.00213362	0.0152006	-0.000603807	0.0192065	-0.0490036	0.0164184	0.0126015	0.0430537
-4.77456	-0.0778473	-0.023787	0.146848	0.121966	0.00386615	-0.111253	-0.0242473	0.0606026	-0.0880448	-0.034671	-0.049536	0.00247713	-0.0476244	-0.0232296	0.00215381	0.0151925	-0.000611828	0.0192131	-0.0489886	0.0164227	0.012607	0.043064
-4.77408	-0.0778699	-0.0237717	0.14687	0.121971	0.00390345	-0.111306	-0.0242327	0.0606057	-0.0880256	-0.0346361	-0.0494906	0.00246399	-0.047614	-0.0232228	0.002174	0.0151844	-0.000619835	0.0192198	-0.0489735	0.016427	0.0126125	0.0430742
-4.7736	-0.0778925	-0.0237564	0.146892	0.121976	0.00394074	-0.111359	-0.0242181	0.0606088	-0.0880064	-0.0346012	-0.0494452	0.00245089	-0.0476036	-0.023216	0.00219416	0.0151764	-0.000627841	0.0192265	-0.0489584	0.0164312	0.012618	0.0430843
-4.77312	-0.077915	-0.023741	0.146914	0.121981	0.00397806	-0.111412	-0.0242034	0.060612	-0.0879873	-0.0345664	-0.0493998	0.00243779	-0.0475932	-0.0232091	0.00221434	0.0151683	-0.000635835	0.0192332	-0.0489434	0.0164355	0.0126235	0.0430945
-4.77264	-0.0779376	-0.0237256	0.146936	0.121986	0.00401539	-0.111465	-0.0241887	0.0606151	-0.0879681	-0.0345315	-0.0493544	0.00242473	-0.0475827	-0.0232022	0.00223448	0.0151603	-0.000643816	0.0192399	-0.0489283	0.0164397	0.012629	0.0431046
-4.77216	-0.0779601	-0.0237102	0.146958	0.121991	0.00405273	-0.111518	-0.0241741	0.0606182	-0.0879489	-0.0344967	-0.049309	0.00241171	-0.0475723	-0.0231954	0.00225464	0.0151523	-0.000651792	0.0192466	-0.0489132	0.0164439	0.0126345	0.0431146
-4.77168	-0.0779826	-0.0236948	0.14698	0.121995	0.00409008	-0.111572	-0.0241594	0.0606213	-0.0879297	-0.0344619	-0.0492637	0.0023987	-0.0475619	-0.0231885	0.00227475	0.0151443	-0.00065976	0.0192533	-0.0488981	0.0164481	0.0126399	0.0431246
-4.7712	-0.0780051	-0.0236794	0.147002	0.122	0.00412745	-0.111625	-0.0241447	0.0606245	-0.0879105	-0.034427	-0.0492182	0.00238573	-0.0475515	-0.0231815	0.0022949	0.0151364	-0.000667719	0.0192599	-0.0488829	0.0164523	0.0126453	0.0431346
-4.77072	-0.0780276	-0.023664	0.147024	0.122005	0.00416484	-0.111678	-0.0241301	0.0606276	-0.0878913	-0.0343922	-0.0491729	0.0023728	-0.0475411	-0.0231746	0.002315	0.0151284	-0.000675662	0.0192666	-0.0488678	0.0164564	0.0126508	0.0431446
-4.77024	-0.0780501	-0.0236485	0.147046	0.122009	0.00420223	-0.111732	-0.0241154	0.0606308	-0.0878721	-0.0343574	-0.0491275	0.00235988	-0.0475307	-0.0231676	0.00233513	0.0151205	-0.000683603	0.0192733	-0.0488527	0.0164606	0.0126562	0.0431545
-4.76976	-0.0780725	-0.023633	0.147068	0.122014	0.00423964	-0.111785	-0.0241007	0.060634	-0.0878529	-0.0343226	-0.0490822	0.002347	-0.0475203	-0.0231607	0.00235523	0.0151126	-0.000691529	0.01928	-0.0488375	0.0164647	0.0126615	0.0431644
-4.76928	-0.0780949	-0.0236175	0.14709	0.122019	0.00427706	-0.111838	-0.024086	0.0606371	-0.0878337	-0.0342878	-0.0490368	0.00233414	-0.0475099	-0.0231537	0.00237534	0.0151047	-0.000699444	0.0192866	-0.0488223	0.0164689	0.0126669	0.0431742
-4.7688	-0.0781173	-0.023602	0.147111	0.122023	0.00431448	-0.111892	-0.0240713	0.0606403	-0.0878144	-0.034253	-0.0489915	0.00232133	-0.0474996	-0.0231467	0.00239543	0.0150968	-0.000707355	0.0192933	-0.0488072	0.016473	0.0126722	0.043184
-4.76832	-0.0781397	-0.0235864	0.147133	0.122028	0.00435193	-0.111945	-0.0240566	0.0606435	-0.0877952	-0.0342182	-0.0489461	0.00230854	-0.0474892	-0.0231396	0.00241553	0.015089	-0.000715248	0.0193	-0.048792	0.0164771	0.0126775	0.0431938
-4.76784	-0.0781621	-0.0235709	0.147155	0.122032	0.00438939	-0.111999	-0.0240419	0.0606467	-0.087776	-0.0341834	-0.0489008	0.00229578	-0.0474788	-0.0231326	0.0024356	0.0150811	-0.000723139	0.0193067	-0.0487768	0.0164812	0.0126829	0.0432035
-4.76736	-0.0781845	-0.0235553	0.147177	0.122037	0.00442686	-0.112053	-0.0240272	0.0606499	-0.0877568	-0.0341486	-0.0488554	0.00228304	-0.0474684	-0.0231255	0.00245569	0.0150733	-0.000731027	0.0193133	-0.0487616	0.0164852	0.0126881	0.0432132
-4.76688	-0.0782068	-0.0235397	0.147198	0.122041	0.00446434	-0.112106	-0.0240125	0.0606531	-0.0877376	-0.0341138	-0.04881	0.00227035	-0.0474581	-0.0231184	0.00247576	0.0150655	-0.0007389	0.01932	-0.0487464	0.0164893	0.0126934	0.0432228
-4.7664	-0.0782292	-0.023524	0.14722	0.122045	0.00450183	-0.11216	-0.0239978	0.0606563	-0.0877184	-0.034079	-0.0487647	0.00225768	-0.0474477	-0.0231113	0.00249584	0.0150578	-0.000746761	0.0193267	-0.0487312	0.0164933	0.0126987	0.0432325
-4.76592	-0.0782515	-0.0235084	0.147242	0.12205	0.00453933	-0.112214	-0.0239831	0.0606596	-0.0876991	-0.0340443	-0.0487193	0.00224505	-0.0474373	-0.0231042	0.00251588	0.01505	-0.000754614	0.0193333	-0.048716	0.0164973	0.0127039	0.043242
-4.76544	-0.0782738	-0.0234927	0.147263	0.122054	0.00457684	-0.112267	-0.0239684	0.0606628	-0.0876799	-0.0340095	-0.0486739	0.00223246	-0.0474269	-0.0230971	0.00253595	0.0150423	-0.00076246	0.01934	-0.0487007	0.0165013	0.0127092	0.0432516
-4.76496	-0.0782961	-0.023477	0.147285	0.122059	0.00461436	-0.112321	-0.0239537	0.0606661	-0.0876606	-0.0339747	-0.0486285	0.0022199	-0.0474166	-0.0230899	0.00255598	0.0150346	-0.000770293	0.0193467	-0.0486855	0.0165053	0.0127144	0.0432611
-4.76448	-0.0783184	-0.0234612	0.147306	0.122063	0.0046519	-0.112375	-0.0239389	0.0606693	-0.0876414	-0.03394	-0.0485831	0.00220741	-0.0474062	-0.0230828	0.00257603	0.0150269	-0.000778118	0.0193533	-0.0486703	0.0165093	0.0127196	0.0432706
-4.764	-0.0783407	-0.0234454	0.147328	0.122067	0.00468944	-0.112429	-0.0239242	0.0606726	-0.0876221	-0.0339052	-0.0485377	0.00219494	-0.0473959	-0.0230756	0.00259605	0.0150192	-0.000785933	0.01936	-0.0486551	0.0165133	0.0127247	0.04328
-4.76352	-0.078363	-0.0234297	0.14735	0.122071	0.004727	-0.112483	-0.0239094	0.0606759	-0.0876029	-0.0338704	-0.0484922	0.00218252	-0.0473855	-0.0230684	0.00261607	0.0150115	-0.000793742	0.0193667	-0.0486398	0.0165172	0.0127299	0.0432894
-4.76304	-0.0783852	-0.0234138	0.147371	0.122076	0.00476456	-0.112537	-0.0238947	0.0606791	-0.0875836	-0.0338357	-0.0484468	0.00217017	-0.0473752	-0.0230612	0.00263607	0.0150039	-0.000801537	0.0193734	-0.0486246	0.0165211	0.012735	0.0432987
-4.76256	-0.0784074	-0.023398	0.147392	0.12208	0.00480213	-0.112591	-0.0238799	0.0606824	-0.0875643	-0.0338009	-0.0484013	0.00215787	-0.0473649	-0.023054	0.00265609	0.0149963	-0.000809332	0.01938	-0.0486093	0.0165251	0.0127402	0.0433081
-4.76208	-0.0784296	-0.0233821	0.147414	0.122084	0.00483973	-0.112645	-0.0238652	0.0606858	-0.087545	-0.0337662	-0.0483559	0.0021456	-0.0473546	-0.0230467	0.00267608	0.0149887	-0.000817113	0.0193867	-0.048594	0.016529	0.0127453	0.0433173
-4.7616	-0.0784517	-0.0233662	0.147435	0.122088	0.00487733	-0.112699	-0.0238504	0.0606891	-0.0875258	-0.0337315	-0.0483104	0.0021334	-0.0473443	-0.0230394	0.00269609	0.0149811	-0.000824874	0.0193934	-0.0485787	0.0165329	0.0127504	0.0433266
-4.76112	-0.0784739	-0.0233503	0.147457	0.122092	0.00491494	-0.112753	-0.0238357	0.0606924	-0.0875065	-0.0336967	-0.0482649	0.00212124	-0.0473339	-0.0230321	0.00271608	0.0149735	-0.000832637	0.0194001	-0.0485635	0.0165368	0.0127555	0.0433358
-4.76064	-0.078496	-0.0233344	0.147478	0.122096	0.00495255	-0.112807	-0.0238209	0.0606957	-0.0874872	-0.033662	-0.0482194	0.00210914	-0.0473237	-0.0230248	0.00273605	0.014966	-0.000840386	0.0194068	-0.0485482	0.0165406	0.0127605	0.043345
-4.76016	-0.0785181	-0.0233184	0.147499	0.1221	0.00499019	-0.112861	-0.0238062	0.0606991	-0.0874678	-0.0336273	-0.0481739	0.00209709	-0.0473133	-0.0230175	0.00275603	0.0149585	-0.000848125	0.0194135	-0.0485329	0.0165445	0.0127656	0.0433541
-4.75968	-0.0785402	-0.0233024	0.147521	0.122104	0.00502783	-0.112915	-0.0237914	0.0607024	-0.0874485	-0.0335925	-0.0481284	0.0020851	-0.047303	-0.0230102	0.00277598	0.014951	-0.000855859	0.0194202	-0.0485176	0.0165483	0.0127706	0.0433632
-4.7592	-0.0785623	-0.0232864	0.147542	0.122108	0.00506548	-0.112969	-0.0237767	0.0607058	-0.0874291	-0.0335578	-0.0480829	0.00207313	-0.0472927	-0.0230028	0.00279595	0.0149436	-0.000863582	0.0194269	-0.0485022	0.0165521	0.0127756	0.0433722
-4.75872	-0.0785844	-0.0232703	0.147563	0.122112	0.00510315	-0.113024	-0.0237619	0.0607092	-0.0874097	-0.0335231	-0.0480373	0.00206124	-0.0472825	-0.0229954	0.0028159	0.0149361	-0.000871287	0.0194336	-0.0484869	0.016556	0.0127806	0.0433813
-4.75824	-0.0786066	-0.0232542	0.147584	0.122116	0.00514081	-0.113078	-0.0237472	0.0607126	-0.0873903	-0.0334884	-0.0479918	0.00204937	-0.0472721	-0.022988	0.00283586	0.0149287	-0.000878994	0.0194403	-0.0484716	0.0165597	0.0127856	0.0433902
-4.75776	-0.0786287	-0.0232381	0.147606	0.12212	0.0051785	-0.113133	-0.0237324	0.060716	-0.0873709	-0.0334536	-0.0479463	0.00203759	-0.0472619	-0.0229806	0.0028558	0.0149213	-0.000886686	0.019447	-0.0484562	0.0165635	0.0127906	0.0433992
-4.75728	-0.0786508	-0.023222	0.147627	0.122123	0.0052162	-0.113187	-0.0237177	0.0607194	-0.0873515	-0.0334189	-0.0479008	0.00202584	-0.0472516	-0.0229732	0.00287575	0.0149139	-0.000894375	0.0194537	-0.0484409	0.0165673	0.0127955	0.0434081
-4.7568	-0.078673	-0.0232058	0.147648	0.122127	0.0052539	-0.113241	-0.0237029	0.0607228	-0.0873321	-0.0333842	-0.0478552	0.00201415	-0.0472413	-0.0229658	0.00289567	0.0149065	-0.000902048	0.0194604	-0.0484256	0.016571	0.0128005	0.0434169
-4.75632	-0.0786951	-0.0231896	0.147669	0.122131	0.00529162	-0.113296	-0.0236881	0.0607262	-0.0873127	-0.0333495	-0.0478097	0.00200249	-0.0472311	-0.0229583	0.0029156	0.0148991	-0.000909713	0.0194671	-0.0484102	0.0165747	0.0128054	0.0434257
-4.75584	-0.0787172	-0.0231734	0.14769	0.122135	0.00532934	-0.11335	-0.0236734	0.0607296	-0.0872933	-0.0333148	-0.0477642	0.0019909	-0.0472208	-0.0229508	0.00293552	0.0148918	-0.000917372	0.0194738	-0.0483948	0.0165784	0.0128103	0.0434345
-4.75536	-0.0787393	-0.0231571	0.147711	0.122138	0.00536708	-0.113405	-0.0236586	0.0607331	-0.0872738	-0.0332801	-0.0477187	0.00197934	-0.0472105	-0.0229433	0.00295545	0.0148844	-0.00092502	0.0194805	-0.0483795	0.0165821	0.0128152	0.0434433
-4.75488	-0.0787613	-0.0231408	0.147732	0.122142	0.00540483	-0.11346	-0.0236438	0.0607366	-0.0872544	-0.0332453	-0.0476732	0.00196782	-0.0472003	-0.0229358	0.00297535	0.0148771	-0.000932661	0.0194872	-0.0483641	0.0165857	0.0128201	0.043452
-4.7544	-0.0787833	-0.0231245	0.147753	0.122146	0.0054426	-0.113514	-0.0236291	0.06074	-0.0872349	-0.0332106	-0.0476276	0.00195635	-0.04719	-0.0229282	0.00299527	0.0148698	-0.000940287	0.0194939	-0.0483487	0.0165894	0.0128249	0.0434607
-4.75392	-0.0788053	-0.0231081	0.147774	0.122149	0.00548037	-0.113569	-0.0236143	0.0607435	-0.0872154	-0.0331759	-0.0475821	0.00194493	-0.0471798	-0.0229206	0.00301516	0.0148625	-0.000947903	0.0195006	-0.0483333	0.016593	0.0128298	0.0434693
-4.75344	-0.0788273	-0.0230917	0.147795	0.122153	0.00551816	-0.113624	-0.0235995	0.060747	-0.0871959	-0.0331412	-0.0475366	0.00193356	-0.0471695	-0.022913	0.00303504	0.0148553	-0.000955507	0.0195074	-0.0483179	0.0165966	0.0128346	0.0434779
-4.75296	-0.0788492	-0.0230752	0.147816	0.122156	0.00555596	-0.113679	-0.0235847	0.0607505	-0.0871764	-0.0331064	-0.0474911	0.00192224	-0.0471593	-0.0229054	0.00305494	0.014848	-0.000963092	0.0195141	-0.0483025	0.0166002	0.0128394	0.0434865
-4.75248	-0.0788712	-0.0230587	0.147837	0.12216	0.00559376	-0.113733	-0.02357	0.060754	-0.0871569	-0.0330717	-0.0474456	0.00191092	-0.047149	-0.0228978	0.00307481	0.0148408	-0.00097067	0.0195208	-0.0482871	0.0166038	0.0128442	0.0434951
-4.752	-0.0788931	-0.0230422	0.147858	0.122163	0.00563158	-0.113788	-0.0235552	0.0607575	-0.0871374	-0.033037	-0.0474001	0.00189965	-0.0471388	-0.0228902	0.00309469	0.0148335	-0.000978234	0.0195275	-0.0482717	0.0166073	0.0128489	0.0435036
-4.75152	-0.0789149	-0.0230257	0.147879	0.122166	0.00566941	-0.113843	-0.0235404	0.060761	-0.0871179	-0.0330023	-0.0473546	0.00188842	-0.0471285	-0.0228825	0.00311457	0.0148263	-0.000985786	0.0195343	-0.0482563	0.0166109	0.0128537	0.043512
-4.75104	-0.0789367	-0.0230091	0.147899	0.12217	0.00570727	-0.113898	-0.0235257	0.0607645	-0.0870984	-0.0329676	-0.0473091	0.00187722	-0.0471183	-0.0228748	0.00313444	0.0148191	-0.000993318	0.019541	-0.0482409	0.0166144	0.0128585	0.0435205
-4.75056	-0.0789584	-0.0229925	0.14792	0.122173	0.00574512	-0.113953	-0.0235109	0.0607681	-0.0870789	-0.0329328	-0.0472636	0.00186608	-0.047108	-0.0228671	0.0031543	0.0148119	-0.00100085	0.0195478	-0.0482255	0.0166179	0.0128632	0.0435289
-4.75008	-0.0789802	-0.0229758	0.147941	0.122176	0.005783	-0.114008	-0.0234961	0.0607716	-0.0870594	-0.0328981	-0.047218	0.00185495	-0.0470978	-0.0228593	0.00317416	0.0148048	-0.00100837	0.0195545	-0.0482101	0.0166214	0.0128679	0.0435372
-4.7496	-0.0790019	-0.0229591	0.147961	0.12218	0.00582089	-0.114063	-0.0234813	0.0607752	-0.0870398	-0.0328634	-0.0471726	0.00184389	-0.0470876	-0.0228516	0.00319403	0.0147976	-0.00101587	0.0195613	-0.0481946	0.0166249	0.0128726	0.0435455
-4.74912	-0.0790236	-0.0229424	0.147982	0.122183	0.0058588	-0.114118	-0.0234666	0.0607788	-0.0870203	-0.0328286	-0.047127	0.00183287	-0.0470773	-0.0228438	0.00321389	0.0147905	-0.00102337	0.019568	-0.0481792	0.0166284	0.0128773	0.0435538
-4.74864	-0.0790452	-0.0229257	0.148003	0.122186	0.00589672	-0.114174	-0.0234518	0.0607823	-0.0870008	-0.0327939	-0.0470816	0.00182193	-0.047067	-0.022836	0.00323373	0.0147833	-0.00103086	0.0195748	-0.0481637	0.0166319	0.012882	0.0435621
-4.74816	-0.0790669	-0.0229089	0.148023	0.122189	0.00593465	-0.114229	-0.023437	0.0607859	-0.0869813	-0.0327592	-0.047036	0.00181103	-0.0470568	-0.0228282	0.00325358	0.0147762	-0.00103833	0.0195816	-0.0481483	0.0166353	0.0128866	0.0435703
-4.74768	-0.0790884	-0.0228921	0.148044	0.122193	0.00597258	-0.114284	-0.0234223	0.0607895	-0.0869617	-0.0327244	-0.0469906	0.0018002	-0.0470466	-0.0228204	0.00327343	0.0147691	-0.00104579	0.0195883	-0.0481329	0.0166388	0.0128912	0.0435785
-4.7472	-0.07911	-0.0228753	0.148064	0.122196	0.00601055	-0.11434	-0.0234075	0.0607931	-0.0869422	-0.0326897	-0.0469451	0.00178941	-0.0470363	-0.0228125	0.00329327	0.0147621	-0.00105324	0.0195951	-0.0481174	0.0166422	0.0128958	0.0435866
-4.74672	-0.0791315	-0.0228584	0.148085	0.122199	0.00604853	-0.114395	-0.0233927	0.0607968	-0.0869227	-0.032655	-0.0468997	0.00177869	-0.0470261	-0.0228047	0.00331311	0.014755	-0.00106069	0.0196019	-0.0481019	0.0166456	0.0129004	0.0435947
-4.74624	-0.079153	-0.0228416	0.148105	0.122202	0.00608651	-0.11445	-0.023378	0.0608004	-0.0869031	-0.0326202	-0.0468543	0.00176801	-0.0470158	-0.0227968	0.00333296	0.0147479	-0.00106811	0.0196087	-0.0480865	0.016649	0.012905	0.0436028
-4.74576	-0.0791745	-0.0228246	0.148126	0.122205	0.00612452	-0.114506	-0.0233632	0.060804	-0.0868836	-0.0325855	-0.0468089	0.0017574	-0.0470056	-0.0227889	0.00335279	0.0147409	-0.00107553	0.0196155	-0.048071	0.0166524	0.0129096	0.0436108
-4.74528	-0.0791959	-0.0228077	0.148146	0.122208	0.00616254	-0.114561	-0.0233484	0.0608077	-0.086864	-0.0325507	-0.0467635	0.00174684	-0.0469954	-0.0227811	0.00337262	0.0147339	-0.00108294	0.0196222	-0.0480555	0.0166558	0.0129142	0.0436188
-4.7448	-0.0792174	-0.0227907	0.148167	0.122211	0.00620058	-0.114617	-0.0233336	0.0608113	-0.0868444	-0.032516	-0.0467181	0.00173635	-0.0469851	-0.0227732	0.00339243	0.0147269	-0.00109034	0.019629	-0.04804	0.0166592	0.0129187	0.0436268
-4.74432	-0.0792388	-0.0227737	0.148187	0.122214	0.00623863	-0.114672	-0.0233189	0.060815	-0.0868249	-0.0324812	-0.0466727	0.0017259	-0.0469749	-0.0227653	0.00341224	0.0147199	-0.00109773	0.0196358	-0.0480245	0.0166625	0.0129232	0.0436347
-4.74384	-0.0792601	-0.0227567	0.148208	0.122217	0.0062767	-0.114728	-0.0233041	0.0608187	-0.0868053	-0.0324464	-0.0466274	0.00171551	-0.0469647	-0.0227573	0.00343205	0.0147129	-0.00110511	0.0196426	-0.048009	0.0166659	0.0129277	0.0436426
-4.74336	-0.0792815	-0.0227396	0.148228	0.12222	0.00631479	-0.114784	-0.0232893	0.0608224	-0.0867857	-0.0324117	-0.046582	0.00170519	-0.0469544	-0.0227494	0.00345184	0.014706	-0.00111248	0.0196494	-0.0479935	0.0166692	0.0129322	0.0436504
-4.74288	-0.0793028	-0.0227225	0.148248	0.122223	0.00635289	-0.114839	-0.0232745	0.060826	-0.0867661	-0.0323769	-0.0465367	0.0016949	-0.0469442	-0.0227415	0.00347165	0.014699	-0.00111983	0.0196562	-0.0479779	0.0166726	0.0129367	0.0436582
-4.7424	-0.0793241	-0.0227054	0.148269	0.122226	0.00639102	-0.114895	-0.0232596	0.0608297	-0.0867464	-0.0323421	-0.0464913	0.0016847	-0.046934	-0.0227335	0.00349143	0.0146921	-0.00112718	0.019663	-0.0479624	0.0166759	0.0129412	0.043666
-4.74192	-0.0793452	-0.0226883	0.148289	0.122229	0.00642915	-0.114951	-0.0232448	0.0608335	-0.0867268	-0.0323073	-0.046446	0.00167455	-0.0469237	-0.0227256	0.00351122	0.0146852	-0.00113451	0.0196698	-0.0479469	0.0166792	0.0129456	0.0436737
-4.74144	-0.0793664	-0.0226711	0.148309	0.122231	0.00646731	-0.115006	-0.02323	0.0608372	-0.0867071	-0.0322725	-0.0464007	0.00166446	-0.0469135	-0.0227176	0.00353101	0.0146784	-0.00114184	0.0196766	-0.0479313	0.0166826	0.01295	0.0436814
-4.74096	-0.0793874	-0.022654	0.148329	0.122234	0.00650547	-0.115062	-0.0232152	0.0608409	-0.0866874	-0.0322378	-0.0463554	0.00165442	-0.0469033	-0.0227096	0.00355079	0.0146716	-0.00114914	0.0196834	-0.0479157	0.0166858	0.0129545	0.0436891
-4.74048	-0.0794085	-0.0226368	0.14835	0.122237	0.00654366	-0.115118	-0.0232004	0.0608447	-0.0866677	-0.032203	-0.0463101	0.00164443	-0.0468931	-0.0227017	0.00357057	0.0146647	-0.00115643	0.0196902	-0.0479002	0.0166891	0.0129588	0.0436967
-4.74	-0.0794294	-0.0226196	0.14837	0.12224	0.00658187	-0.115174	-0.0231856	0.0608484	-0.086648	-0.0321682	-0.0462647	0.00163451	-0.0468829	-0.0226937	0.00359036	0.0146579	-0.00116373	0.0196969	-0.0478846	0.0166924	0.0129632	0.0437042
-4.73952	-0.0794502	-0.0226023	0.14839	0.122243	0.00662011	-0.115229	-0.0231707	0.0608522	-0.0866283	-0.0321334	-0.0462194	0.00162464	-0.0468727	-0.0226858	0.00361013	0.0146511	-0.001171	0.0197037	-0.047869	0.0166957	0.0129676	0.0437118
-4.73904	-0.079471	-0.0225851	0.14841	0.122245	0.00665835	-0.115285	-0.0231559	0.0608559	-0.0866085	-0.0320986	-0.0461742	0.00161484	-0.0468625	-0.0226778	0.0036299	0.0146444	-0.00117827	0.0197105	-0.0478534	0.0166989	0.012972	0.0437192
-4.73856	-0.0794918	-0.0225678	0.14843	0.122248	0.00669662	-0.115341	-0.0231411	0.0608597	-0.0865888	-0.0320638	-0.0461289	0.00160509	-0.0468523	-0.0226698	0.00364966	0.0146376	-0.00118553	0.0197173	-0.0478378	0.0167022	0.0129763	0.0437267
-4.73808	-0.0795125	-0.0225504	0.14845	0.122251	0.0067349	-0.115397	-0.0231263	0.0608635	-0.086569	-0.032029	-0.0460836	0.00159539	-0.0468421	-0.0226618	0.00366941	0.0146309	-0.00119278	0.0197241	-0.0478222	0.0167054	0.0129806	0.0437341
-4.7376	-0.0795333	-0.0225331	0.14847	0.122254	0.0067732	-0.115453	-0.0231114	0.0608673	-0.0865492	-0.0319941	-0.0460383	0.00158574	-0.0468319	-0.0226538	0.00368918	0.0146242	-0.00120001	0.0197308	-0.0478066	0.0167086	0.0129849	0.0437414
-4.73712	-0.0795541	-0.0225157	0.14849	0.122256	0.00681152	-0.115509	-0.0230966	0.0608711	-0.0865294	-0.0319593	-0.0459931	0.00157618	-0.0468217	-0.0226459	0.00370894	0.0146175	-0.00120723	0.0197376	-0.047791	0.0167119	0.0129892	0.0437488
-4.73664	-0.0795748	-0.0224983	0.14851	0.122259	0.00684986	-0.115564	-0.0230818	0.060875	-0.0865095	-0.0319245	-0.0459478	0.00156667	-0.0468115	-0.0226379	0.00372868	0.0146108	-0.00121445	0.0197443	-0.0477754	0.0167151	0.0129935	0.0437561
-4.73616	-0.0795955	-0.0224809	0.14853	0.122262	0.00688821	-0.11562	-0.023067	0.0608788	-0.0864896	-0.0318897	-0.0459026	0.00155723	-0.0468013	-0.0226299	0.00374843	0.0146041	-0.00122165	0.0197511	-0.0477598	0.0167182	0.0129978	0.0437633
-4.73568	-0.0796163	-0.0224634	0.14855	0.122264	0.00692656	-0.115676	-0.0230521	0.0608827	-0.0864698	-0.0318549	-0.0458573	0.00154783	-0.0467911	-0.0226219	0.00376816	0.0145975	-0.00122884	0.0197578	-0.0477441	0.0167214	0.013002	0.0437706
-4.7352	-0.0796369	-0.022446	0.14857	0.122267	0.00696494	-0.115732	-0.0230373	0.0608865	-0.0864499	-0.03182	-0.0458121	0.00153849	-0.0467809	-0.0226138	0.0037879	0.0145908	-0.00123601	0.0197646	-0.0477285	0.0167246	0.0130062	0.0437777
-4.73472	-0.0796575	-0.0224284	0.14859	0.122269	0.00700334	-0.115788	-0.0230225	0.0608904	-0.08643	-0.0317852	-0.0457669	0.00152919	-0.0467708	-0.0226058	0.00380762	0.0145842	-0.00124318	0.0197713	-0.0477128	0.0167278	0.0130105	0.0437849
-4.73424	-0.0796781	-0.0224109	0.148609	0.122272	0.00704174	-0.115844	-0.0230077	0.0608943	-0.0864101	-0.0317504	-0.0457216	0.00151995	-0.0467606	-0.0225977	0.00382736	0.0145775	-0.00125034	0.019778	-0.0476972	0.0167309	0.0130147	0.043792
-4.73376	-0.0796987	-0.0223933	0.148629	0.122275	0.00708016	-0.1159	-0.0229929	0.0608982	-0.0863901	-0.0317155	-0.0456764	0.00151073	-0.0467504	-0.0225897	0.00384706	0.0145709	-0.00125748	0.0197847	-0.0476815	0.0167341	0.0130189	0.0437991
-4.73328	-0.0797192	-0.0223757	0.148649	0.122277	0.0071186	-0.115956	-0.0229782	0.0609021	-0.0863702	-0.0316807	-0.0456312	0.00150159	-0.0467402	-0.0225817	0.00386676	0.0145643	-0.00126462	0.0197914	-0.0476658	0.0167372	0.0130231	0.0438062
-4.7328	-0.0797397	-0.0223581	0.148669	0.12228	0.00715705	-0.116012	-0.0229634	0.0609061	-0.0863503	-0.0316459	-0.0455859	0.00149248	-0.04673	-0.0225736	0.00388645	0.0145576	-0.00127173	0.0197982	-0.0476501	0.0167404	0.0130272	0.0438132
-4.73232	-0.0797601	-0.0223404	0.148688	0.122282	0.00719552	-0.116068	-0.0229486	0.06091	-0.0863303	-0.031611	-0.0455407	0.00148343	-0.0467198	-0.0225656	0.00390614	0.014551	-0.00127884	0.0198049	-0.0476344	0.0167435	0.0130314	0.0438201
-4.73184	-0.0797806	-0.0223227	0.148708	0.122285	0.00723399	-0.116124	-0.0229338	0.060914	-0.0863103	-0.0315762	-0.0454955	0.00147441	-0.0467096	-0.0225575	0.00392581	0.0145444	-0.00128593	0.0198116	-0.0476187	0.0167466	0.0130356	0.0438271
-4.73136	-0.0798009	-0.022305	0.148728	0.122287	0.00727249	-0.11618	-0.022919	0.0609179	-0.0862903	-0.0315413	-0.0454503	0.00146545	-0.0466994	-0.0225495	0.00394548	0.0145378	-0.00129302	0.0198183	-0.0476029	0.0167498	0.0130397	0.043834
-4.73088	-0.0798213	-0.0222872	0.148747	0.12229	0.007311	-0.116236	-0.0229043	0.0609219	-0.0862703	-0.0315065	-0.0454051	0.00145655	-0.0466892	-0.0225414	0.00396514	0.0145312	-0.0013001	0.019825	-0.0475872	0.0167529	0.0130438	0.0438409
-4.7304	-0.0798416	-0.0222694	0.148767	0.122292	0.00734953	-0.116292	-0.0228895	0.0609259	-0.0862503	-0.0314716	-0.0453599	0.00144774	-0.046679	-0.0225333	0.0039848	0.0145247	-0.00130715	0.0198317	-0.0475715	0.016756	0.0130479	0.0438477
-4.72992	-0.0798619	-0.0222516	0.148787	0.122295	0.00738806	-0.116348	-0.0228747	0.0609299	-0.0862302	-0.0314368	-0.0453147	0.00143898	-0.0466688	-0.0225252	0.00400444	0.0145181	-0.0013142	0.0198384	-0.0475557	0.0167591	0.013052	0.0438545
-4.72944	-0.0798821	-0.0222337	0.148806	0.122297	0.00742661	-0.116404	-0.02286	0.0609339	-0.0862102	-0.0314019	-0.0452696	0.00143029	-0.0466585	-0.0225172	0.00402407	0.0145115	-0.00132123	0.0198451	-0.0475399	0.0167622	0.0130561	0.0438613
-4.72896	-0.0799022	-0.0222159	0.148826	0.1223	0.00746517	-0.116461	-0.0228452	0.060938	-0.0861901	-0.031367	-0.0452244	0.00142165	-0.0466483	-0.022509	0.0040437	0.014505	-0.00132824	0.0198517	-0.0475242	0.0167653	0.0130601	0.043868
-4.72848	-0.0799224	-0.0221979	0.148845	0.122302	0.00750374	-0.116517	-0.0228305	0.060942	-0.08617	-0.0313322	-0.0451792	0.00141308	-0.0466381	-0.0225009	0.00406333	0.0144985	-0.00133525	0.0198584	-0.0475084	0.0167683	0.0130642	0.0438747
-4.728	-0.0799425	-0.02218	0.148865	0.122304	0.00754232	-0.116573	-0.0228157	0.0609461	-0.0861499	-0.0312973	-0.0451341	0.00140456	-0.0466279	-0.0224928	0.00408293	0.0144919	-0.00134225	0.0198651	-0.0474927	0.0167714	0.0130682	0.0438814
-4.72752	-0.0799625	-0.022162	0.148884	0.122307	0.00758093	-0.116629	-0.022801	0.0609501	-0.0861298	-0.0312624	-0.0450889	0.0013961	-0.0466177	-0.0224846	0.00410253	0.0144854	-0.00134923	0.0198718	-0.0474769	0.0167745	0.0130722	0.043888
-4.72704	-0.0799825	-0.022144	0.148903	0.122309	0.00761953	-0.116685	-0.0227862	0.0609542	-0.0861097	-0.0312275	-0.0450437	0.00138771	-0.0466075	-0.0224765	0.00412213	0.0144789	-0.00135621	0.0198785	-0.0474611	0.0167775	0.0130762	0.0438946
-4.72656	-0.0800024	-0.0221259	0.148923	0.122311	0.00765815	-0.116742	-0.0227715	0.0609583	-0.0860895	-0.0311926	-0.0449986	0.00137939	-0.0465973	-0.0224683	0.00414172	0.0144725	-0.00136317	0.0198851	-0.0474454	0.0167806	0.0130802	0.0439012
-4.72608	-0.0800223	-0.0221079	0.148942	0.122313	0.00769679	-0.116798	-0.0227567	0.0609624	-0.0860693	-0.0311577	-0.0449535	0.00137114	-0.046587	-0.02246	0.00416129	0.014466	-0.00137011	0.0198918	-0.0474296	0.0167837	0.0130842	0.0439077
-4.7256	-0.0800421	-0.0220897	0.148961	0.122315	0.00773543	-0.116854	-0.022742	0.0609665	-0.0860491	-0.0311228	-0.0449083	0.00136294	-0.0465768	-0.0224518	0.00418086	0.0144596	-0.00137705	0.0198985	-0.0474138	0.0167867	0.0130881	0.0439142
-4.72512	-0.0800617	-0.0220716	0.148981	0.122318	0.00777409	-0.116911	-0.0227273	0.0609706	-0.0860289	-0.0310879	-0.0448632	0.00135483	-0.0465666	-0.0224435	0.00420043	0.0144532	-0.00138399	0.0199052	-0.0473981	0.0167897	0.0130921	0.0439207
-4.72464	-0.0800813	-0.0220534	0.149	0.12232	0.00781276	-0.116967	-0.0227126	0.0609747	-0.0860086	-0.0310529	-0.0448181	0.00134678	-0.0465564	-0.0224352	0.00421999	0.0144468	-0.0013909	0.0199118	-0.0473823	0.0167928	0.013096	0.0439271
-4.72416	-0.0801009	-0.0220352	0.149019	0.122322	0.00785144	-0.117023	-0.0226979	0.0609789	-0.0859884	-0.031018	-0.044773	0.0013388	-0.0465461	-0.0224269	0.00423953	0.0144404	-0.0013978	0.0199185	-0.0473665	0.0167958	0.0130999	0.0439335
-4.72368	-0.0801205	-0.0220169	0.149039	0.122324	0.00789014	-0.11708	-0.0226832	0.060983	-0.0859681	-0.030983	-0.0447279	0.00133088	-0.0465359	-0.0224186	0.00425906	0.014434	-0.00140469	0.0199252	-0.0473507	0.0167989	0.0131038	0.0439399
-4.7232	-0.08014	-0.0219986	0.149058	0.122326	0.00792885	-0.117136	-0.0226685	0.0609872	-0.0859478	-0.0309481	-0.0446827	0.001323	-0.0465257	-0.0224102	0.00427859	0.0144276	-0.00141156	0.0199319	-0.047335	0.0168019	0.0131076	0.0439462
-4.72272	-0.0801596	-0.0219803	0.149077	0.122328	0.00796755	-0.117193	-0.0226538	0.0609913	-0.0859275	-0.0309131	-0.0446377	0.00131522	-0.0465154	-0.0224018	0.00429812	0.0144213	-0.00141842	0.0199385	-0.0473192	0.0168049	0.0131115	0.0439525
-4.72224	-0.0801791	-0.0219619	0.149096	0.12233	0.00800628	-0.117249	-0.0226391	0.0609955	-0.0859072	-0.0308781	-0.0445926	0.0013075	-0.0465052	-0.0223934	0.00431764	0.014415	-0.00142527	0.0199452	-0.0473035	0.0168079	0.0131153	0.0439587
-4.72176	-0.0801986	-0.0219435	0.149115	0.122331	0.00804502	-0.117306	-0.0226244	0.0609997	-0.0858869	-0.0308431	-0.0445475	0.00129985	-0.046495	-0.0223849	0.00433714	0.0144086	-0.00143211	0.0199518	-0.0472877	0.0168109	0.0131192	0.0439649
-4.72128	-0.0802181	-0.0219251	0.149134	0.122333	0.00808378	-0.117362	-0.0226097	0.0610039	-0.0858665	-0.0308081	-0.0445025	0.0012923	-0.0464848	-0.0223765	0.00435662	0.0144023	-0.00143895	0.0199585	-0.0472719	0.0168139	0.013123	0.0439711
-4.7208	-0.0802375	-0.0219066	0.149153	0.122335	0.00812253	-0.117419	-0.022595	0.0610081	-0.0858462	-0.0307731	-0.0444574	0.0012848	-0.0464745	-0.022368	0.0043761	0.0143961	-0.00144576	0.0199652	-0.0472561	0.0168169	0.0131268	0.0439773
-4.72032	-0.080257	-0.0218881	0.149173	0.122337	0.00816132	-0.117475	-0.0225803	0.0610124	-0.0858258	-0.0307381	-0.0444124	0.00127739	-0.0464643	-0.0223595	0.00439556	0.0143898	-0.00145257	0.0199718	-0.0472404	0.01682	0.0131305	0.0439834
-4.71984	-0.0802763	-0.0218695	0.149192	0.122339	0.0082001	-0.117532	-0.0225656	0.0610166	-0.0858054	-0.0307031	-0.0443673	0.00127003	-0.0464541	-0.022351	0.00441502	0.0143835	-0.00145936	0.0199785	-0.0472246	0.016823	0.0131343	0.0439895
-4.71936	-0.0802957	-0.0218509	0.149211	0.12234	0.00823891	-0.117589	-0.0225509	0.0610208	-0.085785	-0.030668	-0.0443222	0.00126278	-0.0464439	-0.0223424	0.00443446	0.0143773	-0.00146616	0.0199852	-0.0472089	0.0168259	0.013138	0.0439956
-4.71888	-0.080315	-0.0218323	0.14923	0.122342	0.00827772	-0.117645	-0.0225362	0.0610251	-0.0857646	-0.030633	-0.0442772	0.00125562	-0.0464336	-0.0223339	0.00445389	0.0143711	-0.00147294	0.0199918	-0.0471931	0.0168289	0.0131418	0.0440016
-4.7184	-0.0803343	-0.0218136	0.149249	0.122343	0.00831655	-0.117702	-0.0225215	0.0610293	-0.0857442	-0.030598	-0.0442322	0.00124855	-0.0464234	-0.0223253	0.00447332	0.0143649	-0.00147971	0.0199985	-0.0471773	0.0168319	0.0131455	0.0440076
-4.71792	-0.0803535	-0.0217949	0.149267	0.122345	0.00835539	-0.117759	-0.0225068	0.0610336	-0.0857237	-0.0305629	-0.0441872	0.00124156	-0.0464131	-0.0223167	0.00449272	0.0143587	-0.00148647	0.0200051	-0.0471615	0.0168349	0.0131492	0.0440136
-4.71744	-0.0803726	-0.0217762	0.149286	0.122346	0.00839424	-0.117816	-0.0224921	0.0610379	-0.0857033	-0.0305279	-0.0441422	0.00123466	-0.0464029	-0.0223081	0.00451211	0.0143525	-0.00149321	0.0200117	-0.0471457	0.0168379	0.0131529	0.0440195
-4.71696	-0.0803917	-0.0217574	0.149305	0.122348	0.0084331	-0.117872	-0.0224774	0.0610422	-0.0856829	-0.0304928	-0.0440972	0.00122787	-0.0463926	-0.0222995	0.0045315	0.0143464	-0.00149995	0.0200184	-0.0471299	0.0168409	0.0131565	0.0440254
-4.71648	-0.0804107	-0.0217386	0.149324	0.122349	0.00847198	-0.117929	-0.0224627	0.0610465	-0.0856624	-0.0304577	-0.0440522	0.00122113	-0.0463824	-0.0222909	0.00455087	0.0143402	-0.00150668	0.020025	-0.0471142	0.0168438	0.0131602	0.0440313
-4.716	-0.0804298	-0.0217198	0.149343	0.122351	0.00851087	-0.117986	-0.022448	0.0610508	-0.0856419	-0.0304226	-0.0440073	0.00121452	-0.0463722	-0.0222822	0.00457024	0.0143341	-0.00151341	0.0200317	-0.0470983	0.0168468	0.0131638	0.0440372
-4.71552	-0.0804488	-0.0217009	0.149362	0.122352	0.00854978	-0.118043	-0.0224333	0.0610551	-0.0856215	-0.0303876	-0.0439623	0.00120796	-0.0463619	-0.0222736	0.00458961	0.014328	-0.00152012	0.0200383	-0.0470825	0.0168498	0.0131674	0.044043
-4.71504	-0.0804678	-0.021682	0.149381	0.122354	0.0085887	-0.1181	-0.0224186	0.0610595	-0.085601	-0.0303525	-0.0439174	0.00120151	-0.0463517	-0.0222649	0.00460894	0.0143219	-0.00152681	0.0200449	-0.0470667	0.0168528	0.013171	0.0440488
-4.71456	-0.0804868	-0.021663	0.149399	0.122355	0.00862763	-0.118157	-0.0224039	0.0610638	-0.0855805	-0.0303174	-0.0438724	0.00119515	-0.0463415	-0.0222562	0.0046283	0.0143159	-0.00153349	0.0200516	-0.0470509	0.0168557	0.0131746	0.0440545
-4.71408	-0.0805058	-0.021644	0.149418	0.122356	0.00866658	-0.118213	-0.0223892	0.0610682	-0.08556	-0.0302823	-0.0438275	0.00118886	-0.0463312	-0.0222474	0.00464763	0.0143098	-0.00154016	0.0200582	-0.0470351	0.0168587	0.0131782	0.0440603
-4.7136	-0.0805249	-0.021625	0.149437	0.122357	0.00870553	-0.11827	-0.0223745	0.0610725	-0.0855395	-0.0302472	-0.0437826	0.00118264	-0.046321	-0.0222387	0.00466697	0.0143038	-0.00154682	0.0200648	-0.0470193	0.0168617	0.0131818	0.044066
-4.71312	-0.080544	-0.0216059	0.149455	0.122358	0.0087445	-0.118327	-0.0223597	0.0610769	-0.085519	-0.0302121	-0.0437377	0.0011765	-0.0463108	-0.02223	0.00468626	0.0142978	-0.00155347	0.0200714	-0.0470035	0.0168646	0.0131853	0.0440717
-4.71264	-0.080563	-0.0215868	0.149474	0.122359	0.00878347	-0.118384	-0.022345	0.0610813	-0.0854984	-0.030177	-0.0436927	0.00117041	-0.0463005	-0.0222212	0.00470558	0.0142918	-0.00156011	0.0200781	-0.0469877	0.0168676	0.0131888	0.0440773
-4.71216	-0.080582	-0.0215676	0.149493	0.122361	0.00882247	-0.118442	-0.0223303	0.0610857	-0.0854779	-0.0301419	-0.0436478	0.00116441	-0.0462903	-0.0222124	0.00472485	0.0142858	-0.00156674	0.0200847	-0.0469719	0.0168705	0.0131924	0.044083
-4.71168	-0.0806011	-0.0215484	0.149511	0.122362	0.00886146	-0.118499	-0.0223155	0.0610901	-0.0854574	-0.0301068	-0.0436029	0.00115847	-0.0462801	-0.0222037	0.00474416	0.0142798	-0.00157336	0.0200913	-0.0469561	0.0168735	0.0131959	0.0440885
-4.7112	-0.0806201	-0.0215291	0.14953	0.122363	0.00890047	-0.118556	-0.0223008	0.0610945	-0.0854368	-0.0300717	-0.043558	0.00115261	-0.0462698	-0.0221949	0.00476341	0.0142738	-0.00157996	0.0200979	-0.0469403	0.0168764	0.0131994	0.0440941
-4.71072	-0.080639	-0.0215098	0.149548	0.122363	0.00893947	-0.118613	-0.0222861	0.0610989	-0.0854163	-0.0300365	-0.0435131	0.00114682	-0.0462596	-0.0221861	0.0047827	0.0142679	-0.00158656	0.0201045	-0.0469244	0.0168794	0.0132028	0.0440997
-4.71024	-0.0806579	-0.0214904	0.149567	0.122364	0.0089785	-0.11867	-0.0222713	0.0611034	-0.0853957	-0.0300014	-0.0434682	0.00114113	-0.0462493	-0.0221772	0.00480193	0.0142619	-0.00159315	0.0201111	-0.0469086	0.0168824	0.0132063	0.0441051
-4.70976	-0.0806768	-0.021471	0.149585	0.122365	0.00901753	-0.118727	-0.0222566	0.0611078	-0.0853752	-0.0299662	-0.0434233	0.00113548	-0.0462391	-0.0221684	0.00482119	0.0142559	-0.00159973	0.0201177	-0.0468928	0.0168853	0.0132097	0.0441106
-4.70928	-0.0806955	-0.0214516	0.149603	0.122366	0.00905658	-0.118785	-0.0222418	0.0611122	-0.0853546	-0.0299311	-0.0433784	0.00112994	-0.0462289	-0.0221595	0.00484041	0.01425	-0.0016063	0.0201243	-0.046877	0.0168883	0.0132131	0.0441161
-4.7088	-0.0807142	-0.021432	0.149622	0.122367	0.00909563	-0.118842	-0.0222271	0.0611167	-0.085334	-0.029896	-0.0433335	0.00112445	-0.0462186	-0.0221507	0.00485965	0.0142441	-0.00161285	0.0201309	-0.0468612	0.0168912	0.0132166	0.0441215
-4.70832	-0.0807329	-0.0214125	0.14964	0.122367	0.00913469	-0.118899	-0.0222123	0.0611211	-0.0853134	-0.0298608	-0.0432887	0.00111905	-0.0462084	-0.0221418	0.00487884	0.0142381	-0.00161939	0.0201375	-0.0468454	0.0168941	0.01322	0.0441269
-4.70784	-0.0807515	-0.0213929	0.149659	0.122368	0.00917377	-0.118957	-0.0221975	0.0611256	-0.0852928	-0.0298257	-0.0432438	0.00111369	-0.0461982	-0.0221329	0.00489804	0.0142322	-0.00162593	0.0201442	-0.0468295	0.0168971	0.0132233	0.0441323
-4.70736	-0.08077	-0.0213732	0.149677	0.122368	0.00921285	-0.119014	-0.0221828	0.0611301	-0.0852722	-0.0297905	-0.043199	0.00110841	-0.046188	-0.0221239	0.00491722	0.0142263	-0.00163245	0.0201508	-0.0468137	0.0169	0.0132267	0.0441376
-4.70688	-0.0807884	-0.0213535	0.149695	0.122369	0.00925194	-0.119072	-0.022168	0.0611346	-0.0852516	-0.0297553	-0.0431541	0.00110317	-0.0461778	-0.022115	0.00493642	0.0142205	-0.00163897	0.0201574	-0.0467979	0.0169029	0.0132301	0.0441429
-4.7064	-0.0808068	-0.0213337	0.149713	0.122369	0.00929105	-0.119129	-0.0221532	0.061139	-0.0852309	-0.0297202	-0.0431092	0.00109801	-0.0461676	-0.022106	0.00495558	0.0142146	-0.00164547	0.020164	-0.0467821	0.0169058	0.0132334	0.0441482
-4.70592	-0.0808252	-0.0213139	0.149731	0.12237	0.00933015	-0.119187	-0.0221385	0.0611435	-0.0852103	-0.029685	-0.0430643	0.0010929	-0.0461574	-0.022097	0.00497475	0.0142087	-0.00165197	0.0201706	-0.0467663	0.0169088	0.0132367	0.0441534
-4.70544	-0.0808436	-0.021294	0.14975	0.12237	0.00936927	-0.119245	-0.0221237	0.0611481	-0.0851896	-0.0296498	-0.0430195	0.00108788	-0.0461471	-0.022088	0.0049939	0.0142029	-0.00165847	0.0201772	-0.0467505	0.0169117	0.01324	0.0441587
-4.70496	-0.0808619	-0.0212741	0.149768	0.122371	0.0094084	-0.119302	-0.0221089	0.0611526	-0.085169	-0.0296146	-0.0429746	0.00108292	-0.0461369	-0.022079	0.00501306	0.0141971	-0.00166494	0.0201838	-0.0467347	0.0169146	0.0132433	0.0441639
-4.70448	-0.0808801	-0.0212542	0.149786	0.122371	0.00944753	-0.11936	-0.0220941	0.0611571	-0.0851483	-0.0295794	-0.0429297	0.00107805	-0.0461267	-0.02207	0.00503219	0.0141913	-0.00167141	0.0201904	-0.0467189	0.0169175	0.0132465	0.044169
-4.704	-0.0808983	-0.0212342	0.149804	0.122371	0.00948667	-0.119418	-0.0220793	0.0611616	-0.0851276	-0.0295442	-0.0428848	0.00107325	-0.0461165	-0.0220609	0.00505133	0.0141855	-0.00167786	0.020197	-0.0467031	0.0169204	0.0132498	0.0441742
-4.70352	-0.0809164	-0.0212141	0.149822	0.122371	0.00952583	-0.119476	-0.0220646	0.0611661	-0.0851069	-0.029509	-0.0428399	0.00106852	-0.0461063	-0.0220519	0.00507043	0.0141797	-0.00168432	0.0202036	-0.0466873	0.0169234	0.013253	0.0441793
-4.70304	-0.0809345	-0.0211941	0.14984	0.122372	0.00956499	-0.119534	-0.0220498	0.0611707	-0.0850862	-0.0294738	-0.042795	0.00106385	-0.0460961	-0.0220428	0.00508955	0.014174	-0.00169076	0.0202102	-0.0466715	0.0169263	0.0132562	0.0441844
-4.70256	-0.0809526	-0.0211739	0.149858	0.122372	0.00960416	-0.119592	-0.022035	0.0611752	-0.0850655	-0.0294386	-0.0427501	0.00105926	-0.0460858	-0.0220338	0.00510865	0.0141683	-0.00169719	0.0202168	-0.0466557	0.0169292	0.0132594	0.0441895
-4.70208	-0.0809706	-0.0211538	0.149876	0.122372	0.00964334	-0.11965	-0.0220203	0.0611798	-0.0850447	-0.0294035	-0.0427052	0.00105474	-0.0460756	-0.0220247	0.00512775	0.0141626	-0.0017036	0.0202234	-0.0466399	0.0169321	0.0132626	0.0441945
-4.7016	-0.0809886	-0.0211336	0.149894	0.122372	0.00968253	-0.119708	-0.0220055	0.0611844	-0.0850239	-0.0293683	-0.0426603	0.00105027	-0.0460654	-0.0220156	0.00514683	0.0141569	-0.00171001	0.0202299	-0.0466241	0.016935	0.0132658	0.0441995
-4.70112	-0.0810066	-0.0211133	0.149911	0.122372	0.00972172	-0.119766	-0.0219907	0.0611889	-0.0850032	-0.0293331	-0.0426154	0.00104587	-0.0460552	-0.0220066	0.00516592	0.0141512	-0.00171641	0.0202365	-0.0466082	0.016938	0.0132689	0.0442045
-4.70064	-0.0810245	-0.021093	0.149929	0.122372	0.00976093	-0.119824	-0.021976	0.0611935	-0.0849824	-0.0292979	-0.0425705	0.00104154	-0.0460449	-0.0219975	0.00518498	0.0141455	-0.00172279	0.0202431	-0.0465924	0.0169409	0.0132721	0.0442095
-4.70016	-0.0810424	-0.0210727	0.149947	0.122372	0.00980015	-0.119882	-0.0219612	0.0611981	-0.0849616	-0.0292627	-0.0425255	0.00103725	-0.0460347	-0.0219884	0.00520406	0.0141398	-0.00172917	0.0202496	-0.0465766	0.0169438	0.0132752	0.0442144
-4.69968	-0.0810603	-0.0210523	0.149965	0.122371	0.00983937	-0.11994	-0.0219465	0.0612027	-0.0849408	-0.0292275	-0.0424806	0.00103301	-0.0460245	-0.0219793	0.00522311	0.0141342	-0.00173553	0.0202562	-0.0465607	0.0169467	0.0132783	0.0442193
-4.6992	-0.0810781	-0.0210319	0.149983	0.122371	0.00987862	-0.119998	-0.0219318	0.0612073	-0.08492	-0.0291923	-0.0424357	0.00102879	-0.0460142	-0.0219702	0.00524215	0.0141285	-0.00174189	0.0202627	-0.0465449	0.0169496	0.0132814	0.0442242
-4.69872	-0.081096	-0.0210115	0.15	0.122371	0.00991786	-0.120057	-0.021917	0.0612119	-0.0848992	-0.0291571	-0.0423907	0.00102467	-0.046004	-0.0219611	0.00526119	0.0141229	-0.00174823	0.0202693	-0.0465291	0.0169525	0.0132844	0.0442291
-4.69824	-0.0811138	-0.020991	0.150018	0.122371	0.00995711	-0.120115	-0.0219023	0.0612166	-0.0848784	-0.0291219	-0.0423458	0.00102056	-0.0459937	-0.021952	0.00528021	0.0141172	-0.00175458	0.0202758	-0.0465132	0.0169554	0.0132875	0.0442339
-4.69776	-0.0811316	-0.0209704	0.150036	0.12237	0.00999637	-0.120173	-0.0218875	0.0612212	-0.0848575	-0.0290867	-0.0423008	0.00101652	-0.0459835	-0.0219429	0.00529924	0.0141116	-0.00176091	0.0202824	-0.0464974	0.0169583	0.0132905	0.0442387
-4.69728	-0.0811494	-0.0209498	0.150053	0.12237	0.0100357	-0.120231	-0.0218728	0.0612258	-0.0848367	-0.0290516	-0.0422558	0.00101253	-0.0459732	-0.0219337	0.00531823	0.014106	-0.00176722	0.0202889	-0.0464815	0.0169612	0.0132935	0.0442435
-4.6968	-0.0811672	-0.0209292	0.150071	0.122369	0.0100749	-0.120289	-0.021858	0.0612305	-0.0848158	-0.0290164	-0.0422109	0.00100862	-0.0459629	-0.0219246	0.00533723	0.0141003	-0.00177352	0.0202954	-0.0464657	0.0169641	0.0132965	0.0442482
-4.69632	-0.081185	-0.0209085	0.150088	0.122369	0.0101142	-0.120348	-0.0218433	0.0612351	-0.0847949	-0.0289812	-0.0421659	0.00100473	-0.0459527	-0.0219155	0.00535621	0.0140947	-0.00177982	0.020302	-0.0464498	0.016967	0.0132994	0.044253
-4.69584	-0.0812028	-0.0208877	0.150106	0.122368	0.0101535	-0.120406	-0.0218286	0.0612398	-0.0847741	-0.028946	-0.0421209	0.00100093	-0.0459424	-0.0219063	0.00537518	0.0140891	-0.00178611	0.0203085	-0.0464339	0.0169699	0.0133024	0.0442577
-4.69536	-0.0812205	-0.0208669	0.150123	0.122367	0.0101928	-0.120464	-0.0218139	0.0612445	-0.0847531	-0.0289108	-0.042076	0.000997158	-0.0459321	-0.0218972	0.00539414	0.0140834	-0.00179238	0.020315	-0.0464181	0.0169728	0.0133054	0.0442623
-4.69488	-0.0812382	-0.0208461	0.150141	0.122367	0.0102322	-0.120523	-0.0217992	0.0612492	-0.0847322	-0.0288756	-0.042031	0.000993466	-0.0459218	-0.021888	0.0054131	0.0140778	-0.00179863	0.0203215	-0.0464022	0.0169758	0.0133083	0.044267
-4.6944	-0.081256	-0.0208253	0.150158	0.122366	0.0102715	-0.120581	-0.0217844	0.0612539	-0.0847113	-0.0288405	-0.041986	0.000989826	-0.0459115	-0.0218789	0.00543205	0.0140722	-0.00180488	0.020328	-0.0463863	0.0169787	0.0133112	0.0442716
-4.69392	-0.0812737	-0.0208044	0.150176	0.122365	0.0103108	-0.12064	-0.0217697	0.0612586	-0.0846904	-0.0288053	-0.041941	0.000986254	-0.0459012	-0.0218697	0.005451	0.0140666	-0.00181112	0.0203345	-0.0463704	0.0169816	0.0133141	0.0442763
-4.69344	-0.0812915	-0.0207834	0.150193	0.122364	0.0103502	-0.120698	-0.021755	0.0612633	-0.0846695	-0.0287702	-0.041896	0.000982721	-0.0458909	-0.0218605	0.00546994	0.014061	-0.00181734	0.020341	-0.0463545	0.0169845	0.0133169	0.0442809
-4.69296	-0.0813092	-0.0207624	0.15021	0.122363	0.0103895	-0.120756	-0.0217403	0.061268	-0.0846485	-0.028735	-0.041851	0.000979246	-0.0458806	-0.0218514	0.00548887	0.0140554	-0.00182355	0.0203475	-0.0463386	0.0169874	0.0133198	0.0442854
-4.69248	-0.0813269	-0.0207414	0.150228	0.122362	0.0104289	-0.120815	-0.0217256	0.0612728	-0.0846275	-0.0286999	-0.0418061	0.000975835	-0.0458703	-0.0218422	0.00550779	0.0140498	-0.00182975	0.020354	-0.0463227	0.0169903	0.0133226	0.04429
-4.692	-0.0813446	-0.0207203	0.150245	0.122361	0.0104682	-0.120873	-0.0217109	0.0612775	-0.0846065	-0.0286647	-0.0417611	0.000972448	-0.0458599	-0.021833	0.00552671	0.0140442	-0.00183593	0.0203605	-0.0463068	0.0169932	0.0133254	0.0442945
-4.69152	-0.0813623	-0.0206992	0.150262	0.122359	0.0105076	-0.120932	-0.0216961	0.0612823	-0.0845855	-0.0286296	-0.0417161	0.00096913	-0.0458496	-0.0218238	0.00554562	0.0140387	-0.00184211	0.020367	-0.046291	0.0169962	0.0133282	0.044299
-4.69104	-0.0813799	-0.0206781	0.150279	0.122358	0.010547	-0.12099	-0.0216814	0.061287	-0.0845645	-0.0285944	-0.041671	0.000965861	-0.0458393	-0.0218146	0.00556451	0.0140331	-0.00184827	0.0203735	-0.046275	0.0169991	0.013331	0.0443035
-4.69056	-0.0813976	-0.0206569	0.150296	0.122357	0.0105864	-0.121049	-0.0216666	0.0612918	-0.0845435	-0.0285593	-0.041626	0.000962641	-0.045829	-0.0218054	0.0055834	0.0140275	-0.0018544	0.02038	-0.0462591	0.017002	0.0133338	0.044308
-4.69008	-0.0814152	-0.0206357	0.150314	0.122355	0.0106258	-0.121108	-0.0216519	0.0612966	-0.0845224	-0.0285242	-0.041581	0.000959472	-0.0458186	-0.0217962	0.00560231	0.014022	-0.00186054	0.0203865	-0.0462432	0.0170049	0.0133365	0.0443125
-4.6896	-0.0814328	-0.0206144	0.150331	0.122354	0.0106652	-0.121166	-0.0216371	0.0613013	-0.0845013	-0.028489	-0.041536	0.00095636	-0.0458083	-0.0217871	0.00562119	0.0140164	-0.00186665	0.0203931	-0.0462273	0.0170078	0.0133392	0.0443169
-4.68912	-0.0814504	-0.0205931	0.150348	0.122352	0.0107047	-0.121225	-0.0216223	0.0613061	-0.0844803	-0.0284539	-0.0414911	0.000953302	-0.045798	-0.0217779	0.00564007	0.0140109	-0.00187276	0.0203996	-0.0462114	0.0170107	0.0133419	0.0443213
-4.68864	-0.081468	-0.0205717	0.150365	0.12235	0.0107441	-0.121283	-0.0216076	0.0613109	-0.0844592	-0.0284188	-0.041446	0.00095031	-0.0457876	-0.0217687	0.00565894	0.0140054	-0.00187884	0.0204061	-0.0461955	0.0170136	0.0133446	0.0443257
-4.68816	-0.0814855	-0.0205503	0.150382	0.122348	0.0107836	-0.121342	-0.0215928	0.0613157	-0.0844381	-0.0283837	-0.0414011	0.000947376	-0.0457773	-0.0217595	0.00567782	0.0139998	-0.00188493	0.0204126	-0.0461796	0.0170165	0.0133473	0.04433
-4.68768	-0.0815031	-0.0205289	0.150399	0.122346	0.010823	-0.121401	-0.021578	0.0613205	-0.0844169	-0.0283486	-0.0413561	0.00094449	-0.0457669	-0.0217502	0.00569669	0.0139943	-0.00189099	0.0204191	-0.0461636	0.0170195	0.01335	0.0443344
-4.6872	-0.0815206	-0.0205074	0.150415	0.122345	0.0108625	-0.12146	-0.0215633	0.0613254	-0.0843958	-0.0283135	-0.0413112	0.000941677	-0.0457565	-0.021741	0.00571554	0.0139888	-0.00189705	0.0204256	-0.0461477	0.0170224	0.0133526	0.0443387
-4.68672	-0.081538	-0.0204859	0.150432	0.122342	0.010902	-0.121518	-0.0215485	0.0613302	-0.0843746	-0.0282784	-0.0412662	0.000938889	-0.0457462	-0.0217318	0.0057344	0.0139832	-0.00190309	0.0204321	-0.0461318	0.0170253	0.0133552	0.044343
-4.68624	-0.0815555	-0.0204644	0.150449	0.12234	0.0109415	-0.121577	-0.0215337	0.061335	-0.0843534	-0.0282433	-0.0412212	0.00093618	-0.0457358	-0.0217226	0.00575326	0.0139777	-0.00190912	0.0204386	-0.0461159	0.0170282	0.0133578	0.0443472
-4.68576	-0.0815729	-0.0204428	0.150466	0.122338	0.010981	-0.121636	-0.0215189	0.0613399	-0.0843323	-0.0282083	-0.0411763	0.00093349	-0.0457254	-0.0217134	0.0057721	0.0139722	-0.00191514	0.0204451	-0.0461	0.0170311	0.0133604	0.0443515
-4.68528	-0.0815902	-0.0204211	0.150483	0.122336	0.0110205	-0.121694	-0.0215041	0.0613447	-0.0843111	-0.0281732	-0.0411313	0.000930868	-0.0457151	-0.0217042	0.00579095	0.0139666	-0.00192113	0.0204515	-0.046084	0.017034	0.013363	0.0443557
-4.6848	-0.0816075	-0.0203995	0.150499	0.122333	0.01106	-0.121753	-0.0214893	0.0613495	-0.0842899	-0.0281381	-0.0410864	0.000928291	-0.0457047	-0.021695	0.0058098	0.0139611	-0.00192712	0.020458	-0.0460681	0.017037	0.0133656	0.0443599
-4.68432	-0.0816248	-0.0203778	0.150516	0.122331	0.0110996	-0.121812	-0.0214745	0.0613544	-0.0842687	-0.028103	-0.0410415	0.000925772	-0.0456943	-0.0216858	0.00582863	0.0139556	-0.0019331	0.0204645	-0.0460522	0.0170399	0.0133681	0.0443641
-4.68384	-0.0816421	-0.020356	0.150533	0.122328	0.0111391	-0.121871	-0.0214597	0.0613593	-0.0842474	-0.0280679	-0.0409965	0.000923309	-0.045684	-0.0216766	0.00584747	0.0139501	-0.00193906	0.020471	-0.0460362	0.0170428	0.0133706	0.0443682
-4.68336	-0.0816593	-0.0203343	0.150549	0.122326	0.0111787	-0.12193	-0.0214449	0.0613641	-0.0842262	-0.0280328	-0.0409515	0.000920907	-0.0456736	-0.0216674	0.0058663	0.0139446	-0.00194501	0.0204774	-0.0460203	0.0170457	0.0133732	0.0443724
-4.68288	-0.0816764	-0.0203125	0.150566	0.122323	0.0112183	-0.121988	-0.02143	0.061369	-0.084205	-0.0279977	-0.0409066	0.000918536	-0.0456632	-0.0216582	0.00588512	0.0139391	-0.00195094	0.0204839	-0.0460044	0.0170486	0.0133757	0.0443765
-4.6824	-0.0816935	-0.0202906	0.150582	0.122321	0.0112579	-0.122047	-0.0214152	0.0613739	-0.0841837	-0.0279626	-0.0408617	0.000916227	-0.0456528	-0.021649	0.00590394	0.0139336	-0.00195686	0.0204903	-0.0459884	0.0170516	0.0133781	0.0443805
-4.68192	-0.0817105	-0.0202687	0.150599	0.122318	0.0112975	-0.122106	-0.0214004	0.0613788	-0.0841624	-0.0279275	-0.0408167	0.000913951	-0.0456425	-0.0216397	0.00592276	0.013928	-0.00196277	0.0204968	-0.0459725	0.0170545	0.0133806	0.0443846
-4.68144	-0.0817274	-0.0202468	0.150615	0.122315	0.0113371	-0.122165	-0.0213856	0.0613836	-0.0841411	-0.0278924	-0.0407718	0.000911771	-0.0456321	-0.0216305	0.00594156	0.0139225	-0.00196866	0.0205032	-0.0459566	0.0170574	0.013383	0.0443886
-4.68096	-0.0817443	-0.0202248	0.150632	0.122312	0.0113767	-0.122223	-0.0213708	0.0613885	-0.0841198	-0.0278574	-0.0407268	0.000909626	-0.0456217	-0.0216212	0.00596037	0.013917	-0.00197454	0.0205097	-0.0459406	0.0170603	0.0133855	0.0443926
-4.68048	-0.081761	-0.0202028	0.150648	0.122309	0.0114164	-0.122282	-0.0213559	0.0613934	-0.0840985	-0.0278223	-0.040682	0.000907539	-0.0456113	-0.021612	0.00597917	0.0139115	-0.00198041	0.0205161	-0.0459247	0.0170633	0.0133879	0.0443966
-4.68	-0.0817777	-0.0201808	0.150665	0.122306	0.011456	-0.122341	-0.0213411	0.0613983	-0.0840772	-0.0277872	-0.040637	0.000905522	-0.045601	-0.0216027	0.00599797	0.0139059	-0.00198625	0.0205225	-0.0459088	0.0170662	0.0133903	0.0444006
-4.67952	-0.0817943	-0.0201587	0.150681	0.122303	0.0114957	-0.1224	-0.0213263	0.0614033	-0.0840559	-0.0277521	-0.0405921	0.000903563	-0.0455906	-0.0215935	0.00601675	0.0139004	-0.00199209	0.020529	-0.0458928	0.0170691	0.0133927	0.0444045
-4.67904	-0.0818109	-0.0201366	0.150697	0.1223	0.0115354	-0.122458	-0.0213115	0.0614082	-0.0840346	-0.027717	-0.0405471	0.000901661	-0.0455802	-0.0215842	0.00603554	0.0138949	-0.0019979	0.0205354	-0.0458769	0.017072	0.013395	0.0444085
-4.67856	-0.0818274	-0.0201144	0.150713	0.122296	0.0115751	-0.122517	-0.0212966	0.0614131	-0.0840132	-0.0276819	-0.0405022	0.000899813	-0.0455698	-0.021575	0.00605433	0.0138894	-0.00200371	0.0205418	-0.0458609	0.017075	0.0133974	0.0444124
-4.67808	-0.0818439	-0.0200922	0.15073	0.122293	0.0116148	-0.122576	-0.0212818	0.061418	-0.0839919	-0.0276468	-0.0404573	0.000898013	-0.0455594	-0.0215657	0.00607311	0.0138838	-0.0020095	0.0205482	-0.045845	0.0170779	0.0133997	0.0444162
-4.6776	-0.0818604	-0.0200699	0.150746	0.122289	0.0116545	-0.122635	-0.021267	0.061423	-0.0839705	-0.0276117	-0.0404124	0.000896281	-0.045549	-0.0215564	0.00609188	0.0138783	-0.00201528	0.0205547	-0.045829	0.0170808	0.013402	0.0444201
-4.67712	-0.0818768	-0.0200476	0.150762	0.122286	0.0116942	-0.122693	-0.0212522	0.0614279	-0.0839492	-0.0275766	-0.0403675	0.00089458	-0.0455386	-0.0215471	0.00611067	0.0138728	-0.00202104	0.0205611	-0.045813	0.0170837	0.0134043	0.0444239
-4.67664	-0.0818932	-0.0200253	0.150778	0.122282	0.0117339	-0.122752	-0.0212374	0.0614328	-0.0839278	-0.0275416	-0.0403226	0.000892952	-0.0455282	-0.0215378	0.00612944	0.0138673	-0.00202678	0.0205675	-0.0457971	0.0170866	0.0134066	0.0444278
-4.67616	-0.0819095	-0.0200029	0.150794	0.122278	0.0117737	-0.122811	-0.0212226	0.0614378	-0.0839064	-0.0275065	-0.0402777	0.000891351	-0.0455178	-0.0215285	0.00614822	0.0138618	-0.00203251	0.0205739	-0.0457811	0.0170896	0.0134088	0.0444316
-4.67568	-0.0819258	-0.0199805	0.15081	0.122275	0.0118134	-0.12287	-0.0212079	0.0614428	-0.083885	-0.0274714	-0.0402329	0.000889828	-0.0455074	-0.0215193	0.00616698	0.0138562	-0.00203823	0.0205803	-0.0457651	0.0170925	0.0134111	0.0444354
-4.6752	-0.0819421	-0.019958	0.150826	0.122271	0.0118532	-0.122928	-0.0211931	0.0614477	-0.0838636	-0.0274363	-0.040188	0.000888337	-0.045497	-0.02151	0.00618576	0.0138507	-0.00204393	0.0205867	-0.0457492	0.0170954	0.0134133	0.0444391
-4.67472	-0.0819583	-0.0199355	0.150842	0.122267	0.011893	-0.122987	-0.0211783	0.0614527	-0.0838421	-0.0274012	-0.0401431	0.000886913	-0.0454866	-0.0215006	0.00620452	0.0138452	-0.00204962	0.0205931	-0.0457332	0.0170984	0.0134155	0.0444429
-4.67424	-0.0819745	-0.019913	0.150858	0.122263	0.0119328	-0.123046	-0.0211636	0.0614577	-0.0838207	-0.0273661	-0.0400982	0.000885533	-0.0454762	-0.0214913	0.00622331	0.0138397	-0.0020553	0.0205995	-0.0457173	0.0171013	0.0134177	0.0444466
-4.67376	-0.0819906	-0.0198904	0.150874	0.122259	0.0119726	-0.123105	-0.0211488	0.0614627	-0.0837992	-0.027331	-0.0400534	0.000884216	-0.0454659	-0.021482	0.00624209	0.0138342	-0.00206096	0.0206058	-0.0457013	0.0171042	0.0134199	0.0444503
-4.67328	-0.0820067	-0.0198678	0.15089	0.122255	0.0120124	-0.123164	-0.021134	0.0614677	-0.0837778	-0.0272959	-0.0400085	0.000882939	-0.0454555	-0.0214726	0.00626088	0.0138287	-0.00206662	0.0206123	-0.0456854	0.0171071	0.013422	0.044454
-4.6728	-0.0820227	-0.0198451	0.150906	0.12225	0.0120522	-0.123222	-0.0211193	0.0614727	-0.0837563	-0.0272608	-0.0399637	0.000881714	-0.0454451	-0.0214633	0.00627965	0.0138232	-0.00207225	0.0206186	-0.0456694	0.01711	0.0134241	0.0444576
-4.67232	-0.0820387	-0.0198225	0.150921	0.122246	0.0120921	-0.123281	-0.0211045	0.0614777	-0.0837348	-0.0272257	-0.0399188	0.000880524	-0.0454347	-0.0214539	0.00629845	0.0138178	-0.00207787	0.020625	-0.0456534	0.017113	0.0134263	0.0444612
-4.67184	-0.0820546	-0.0197998	0.150937	0.122242	0.0121319	-0.12334	-0.0210898	0.0614827	-0.0837132	-0.0271906	-0.039874	0.000879385	-0.0454243	-0.0214446	0.00631723	0.0138123	-0.00208347	0.0206314	-0.0456374	0.0171159	0.0134284	0.0444648
-4.67136	-0.0820705	-0.019777	0.150953	0.122237	0.0121718	-0.123399	-0.0210751	0.0614878	-0.0836916	-0.0271555	-0.0398292	0.00087828	-0.0454139	-0.0214352	0.00633602	0.0138069	-0.00208907	0.0206377	-0.0456215	0.0171188	0.0134305	0.0444684
-4.67088	-0.0820864	-0.0197543	0.150969	0.122233	0.0122116	-0.123458	-0.0210604	0.0614928	-0.0836701	-0.0271204	-0.0397844	0.000877234	-0.0454035	-0.0214259	0.00635482	0.0138014	-0.00209465	0.0206441	-0.0456055	0.0171217	0.0134326	0.044472
-4.6704	-0.0821022	-0.0197314	0.150984	0.122228	0.0122515	-0.123517	-0.0210457	0.0614978	-0.0836485	-0.0270853	-0.0397395	0.000876195	-0.0453931	-0.0214165	0.00637362	0.013796	-0.00210022	0.0206505	-0.0455895	0.0171246	0.0134346	0.0444755
-4.66992	-0.0821179	-0.0197086	0.151	0.122223	0.0122914	-0.123576	-0.021031	0.0615029	-0.0836268	-0.0270502	-0.0396947	0.000875234	-0.0453826	-0.0214071	0.00639241	0.0137905	-0.00210578	0.0206568	-0.0455735	0.0171275	0.0134367	0.0444791
-4.66944	-0.0821337	-0.0196857	0.151016	0.122219	0.0123312	-0.123634	-0.0210163	0.061508	-0.0836051	-0.0270151	-0.0396499	0.000874307	-0.0453722	-0.0213978	0.00641124	0.0137851	-0.00211133	0.0206632	-0.0455576	0.0171304	0.0134387	0.0444825
-4.66896	-0.0821493	-0.0196628	0.151031	0.122214	0.0123711	-0.123693	-0.0210016	0.061513	-0.0835835	-0.02698	-0.0396051	0.000873442	-0.0453618	-0.0213885	0.00643003	0.0137797	-0.00211686	0.0206695	-0.0455416	0.0171333	0.0134408	0.044486
-4.66848	-0.082165	-0.0196399	0.151047	0.122209	0.012411	-0.123752	-0.020987	0.0615181	-0.0835618	-0.0269448	-0.0395603	0.000872586	-0.0453514	-0.0213791	0.00644885	0.0137743	-0.00212239	0.0206758	-0.0455256	0.0171362	0.0134428	0.0444895
-4.668	-0.0821806	-0.019617	0.151062	0.122204	0.0124509	-0.123811	-0.0209723	0.0615232	-0.0835401	-0.0269097	-0.0395155	0.000871799	-0.0453409	-0.0213698	0.00646766	0.0137688	-0.00212789	0.0206822	-0.0455096	0.0171391	0.0134448	0.0444929
-4.66752	-0.0821961	-0.019594	0.151078	0.122199	0.0124908	-0.12387	-0.0209577	0.0615283	-0.0835184	-0.0268746	-0.0394707	0.000871045	-0.0453305	-0.0213605	0.00648647	0.0137634	-0.0021334	0.0206885	-0.0454936	0.017142	0.0134468	0.0444963
-4.66704	-0.0822115	-0.019571	0.151093	0.122194	0.0125307	-0.123929	-0.020943	0.0615333	-0.0834966	-0.0268395	-0.039426	0.000870344	-0.0453201	-0.0213512	0.00650528	0.013758	-0.00213888	0.0206948	-0.0454777	0.0171449	0.0134487	0.0444997
-4.66656	-0.082227	-0.0195479	0.151109	0.122189	0.0125706	-0.123988	-0.0209284	0.0615384	-0.0834749	-0.0268043	-0.0393812	0.000869671	-0.0453097	-0.0213418	0.0065241	0.0137526	-0.00214435	0.0207011	-0.0454617	0.0171478	0.0134507	0.044503
-4.66608	-0.0822423	-0.0195249	0.151124	0.122184	0.0126106	-0.124047	-0.0209138	0.0615435	-0.0834532	-0.0267692	-0.0393365	0.000869064	-0.0452992	-0.0213325	0.00654293	0.0137473	-0.00214981	0.0207074	-0.0454457	0.0171506	0.0134526	0.0445063
-4.6656	-0.0822577	-0.0195018	0.151139	0.122179	0.0126505	-0.124106	-0.0208991	0.0615486	-0.0834314	-0.0267341	-0.0392917	0.000868487	-0.0452888	-0.0213232	0.00656176	0.0137419	-0.00215527	0.0207138	-0.0454297	0.0171535	0.0134546	0.0445096
-4.66512	-0.0822729	-0.0194787	0.151155	0.122174	0.0126904	-0.124165	-0.0208845	0.0615537	-0.0834096	-0.026699	-0.039247	0.000867975	-0.0452784	-0.0213139	0.00658059	0.0137366	-0.0021607	0.0207201	-0.0454137	0.0171564	0.0134565	0.0445129
-4.66464	-0.0822881	-0.0194555	0.15117	0.122168	0.0127304	-0.124224	-0.0208699	0.0615589	-0.0833878	-0.0266638	-0.0392022	0.000867481	-0.045268	-0.0213046	0.00659943	0.0137312	-0.00216612	0.0207264	-0.0453978	0.0171593	0.0134584	0.0445162
-4.66416	-0.0823032	-0.0194323	0.151185	0.122163	0.0127703	-0.124283	-0.0208553	0.061564	-0.083366	-0.0266287	-0.0391575	0.000867022	-0.0452576	-0.0212953	0.00661827	0.0137259	-0.00217155	0.0207327	-0.0453818	0.0171622	0.0134603	0.0445194
-4.66368	-0.0823184	-0.0194091	0.1512	0.122157	0.0128103	-0.124342	-0.0208407	0.0615691	-0.0833442	-0.0265935	-0.0391128	0.000866602	-0.0452472	-0.0212861	0.00663711	0.0137206	-0.00217694	0.020739	-0.0453658	0.0171651	0.0134621	0.0445227
-4.6632	-0.0823334	-0.0193859	0.151216	0.122152	0.0128503	-0.124401	-0.0208261	0.0615743	-0.0833224	-0.0265584	-0.0390682	0.000866249	-0.0452368	-0.0212768	0.00665595	0.0137153	-0.00218232	0.0207453	-0.0453499	0.017168	0.013464	0.0445259
-4.66272	-0.0823483	-0.0193626	0.151231	0.122146	0.0128902	-0.12446	-0.0208115	0.0615794	-0.0833006	-0.0265232	-0.0390235	0.000865908	-0.0452264	-0.0212676	0.0066748	0.01371	-0.0021877	0.0207516	-0.0453339	0.0171709	0.0134659	0.044529
-4.66224	-0.0823633	-0.0193393	0.151246	0.122141	0.0129302	-0.124519	-0.0207969	0.0615846	-0.0832787	-0.0264881	-0.0389788	0.000865617	-0.0452159	-0.0212584	0.00669366	0.0137047	-0.00219305	0.0207579	-0.0453179	0.0171738	0.0134677	0.0445322
-4.66176	-0.0823781	-0.019316	0.151261	0.122135	0.0129702	-0.124578	-0.0207822	0.0615897	-0.0832569	-0.0264529	-0.0389342	0.000865363	-0.0452055	-0.0212492	0.00671251	0.0136994	-0.0021984	0.0207642	-0.045302	0.0171768	0.0134695	0.0445353
-4.66128	-0.0823929	-0.0192927	0.151276	0.122129	0.0130102	-0.124636	-0.0207676	0.0615949	-0.083235	-0.0264178	-0.0388895	0.000865155	-0.0451951	-0.02124	0.00673139	0.0136941	-0.00220372	0.0207705	-0.045286	0.0171797	0.0134713	0.0445384
-4.6608	-0.0824076	-0.0192693	0.151291	0.122123	0.0130502	-0.124695	-0.020753	0.0616001	-0.0832132	-0.0263827	-0.0388449	0.000864976	-0.0451847	-0.0212308	0.00675027	0.0136889	-0.00220903	0.0207768	-0.04527	0.0171826	0.0134731	0.0445415
-4.66032	-0.0824223	-0.0192459	0.151306	0.122117	0.0130902	-0.124754	-0.0207384	0.0616052	-0.0831914	-0.0263475	-0.0388003	0.000864856	-0.0451743	-0.0212217	0.00676914	0.0136836	-0.00221433	0.0207831	-0.045254	0.0171855	0.0134748	0.0445446
-4.65984	-0.0824369	-0.0192224	0.151321	0.122111	0.0131302	-0.124813	-0.0207238	0.0616104	-0.0831695	-0.0263124	-0.0387557	0.000864769	-0.0451639	-0.0212125	0.00678803	0.0136783	-0.00221961	0.0207893	-0.0452381	0.0171884	0.0134766	0.0445477
-4.65936	-0.0824515	-0.019199	0.151336	0.122105	0.0131702	-0.124872	-0.0207092	0.0616156	-0.0831477	-0.0262772	-0.0387111	0.000864755	-0.0451535	-0.0212034	0.00680695	0.013673	-0.00222488	0.0207956	-0.0452221	0.0171914	0.0134784	0.0445507
-4.65888	-0.082466	-0.0191755	0.151351	0.122099	0.0132103	-0.124931	-0.0206946	0.0616208	-0.0831258	-0.0262421	-0.0386665	0.000864766	-0.0451431	-0.0211943	0.00682586	0.0136677	-0.00223013	0.0208019	-0.0452062	0.0171943	0.0134801	0.0445537
-4.6584	-0.0824805	-0.0191519	0.151366	0.122093	0.0132503	-0.12499	-0.0206799	0.061626	-0.0831039	-0.0262069	-0.0386219	0.000864837	-0.0451327	-0.0211852	0.00684478	0.0136624	-0.00223537	0.0208082	-0.0451902	0.0171972	0.0134818	0.0445567
-4.65792	-0.0824948	-0.0191284	0.151381	0.122086	0.0132903	-0.125048	-0.0206653	0.0616312	-0.0830821	-0.0261718	-0.0385774	0.000864943	-0.0451223	-0.0211761	0.0068637	0.0136571	-0.0022406	0.0208144	-0.0451742	0.0172002	0.0134835	0.0445596
-4.65744	-0.0825091	-0.0191048	0.151396	0.12208	0.0133304	-0.125107	-0.0206506	0.0616364	-0.0830602	-0.0261366	-0.0385328	0.000865107	-0.0451119	-0.021167	0.00688262	0.0136518	-0.0022458	0.0208207	-0.0451583	0.0172031	0.0134852	0.0445626
-4.65696	-0.0825234	-0.0190812	0.151411	0.122074	0.0133705	-0.125166	-0.020636	0.0616416	-0.0830384	-0.0261015	-0.0384883	0.000865312	-0.0451015	-0.021158	0.00690157	0.0136466	-0.002251	0.020827	-0.0451423	0.0172061	0.0134869	0.0445655
-4.65648	-0.0825376	-0.0190576	0.151426	0.122067	0.0134105	-0.125224	-0.0206213	0.0616468	-0.0830165	-0.0260664	-0.0384438	0.000865575	-0.0450911	-0.0211489	0.00692051	0.0136413	-0.00225618	0.0208332	-0.0451263	0.017209	0.0134885	0.0445684
-4.656	-0.0825517	-0.019034	0.15144	0.122061	0.0134506	-0.125283	-0.0206067	0.0616521	-0.0829947	-0.0260312	-0.0383992	0.000865872	-0.0450807	-0.0211399	0.00693946	0.013636	-0.00226135	0.0208395	-0.0451104	0.017212	0.0134902	0.0445712
-4.65552	-0.0825657	-0.0190103	0.151455	0.122054	0.0134907	-0.125342	-0.020592	0.0616573	-0.0829728	-0.0259961	-0.0383547	0.000866228	-0.0450704	-0.0211309	0.00695843	0.0136308	-0.00226651	0.0208457	-0.0450944	0.017215	0.0134918	0.0445741
-4.65504	-0.0825797	-0.0189866	0.15147	0.122047	0.0135308	-0.1254	-0.0205774	0.0616626	-0.082951	-0.0259609	-0.0383103	0.000866622	-0.04506	-0.0211219	0.00697741	0.0136255	-0.00227165	0.020852	-0.0450785	0.0172179	0.0134935	0.0445769
-4.65456	-0.0825937	-0.0189629	0.151485	0.122041	0.0135709	-0.125459	-0.0205627	0.0616678	-0.0829291	-0.0259258	-0.0382658	0.000867064	-0.0450496	-0.0211128	0.00699639	0.0136202	-0.00227677	0.0208582	-0.0450625	0.0172209	0.0134951	0.0445797
-4.65408	-0.0826075	-0.0189392	0.151499	0.122034	0.013611	-0.125517	-0.0205481	0.0616731	-0.0829073	-0.0258906	-0.0382213	0.000867523	-0.0450392	-0.0211038	0.0070154	0.013615	-0.00228188	0.0208645	-0.0450466	0.0172239	0.0134967	0.0445824
-4.6536	-0.0826213	-0.0189154	0.151514	0.122027	0.0136511	-0.125576	-0.0205334	0.0616783	-0.0828854	-0.0258554	-0.0381769	0.000868046	-0.0450288	-0.0210948	0.0070344	0.0136097	-0.00228697	0.0208707	-0.0450306	0.0172269	0.0134983	0.0445852
-4.65312	-0.0826351	-0.0188916	0.151528	0.12202	0.0136912	-0.125634	-0.0205187	0.0616836	-0.0828635	-0.0258203	-0.0381324	0.000868548	-0.0450184	-0.0210858	0.00705342	0.0136045	-0.00229205	0.020877	-0.0450147	0.0172298	0.0134998	0.0445879
-4.65264	-0.0826487	-0.0188679	0.151543	0.122013	0.0137313	-0.125693	-0.0205041	0.0616888	-0.0828416	-0.0257851	-0.038088	0.000869129	-0.0450081	-0.0210769	0.00707245	0.0135992	-0.00229711	0.0208832	-0.0449988	0.0172328	0.0135014	0.0445906
-4.65216	-0.0826624	-0.018844	0.151558	0.122006	0.0137715	-0.125752	-0.0204894	0.0616941	-0.0828198	-0.02575	-0.0380436	0.000869709	-0.0449977	-0.0210679	0.00709148	0.0135939	-0.00230215	0.0208894	-0.0449828	0.0172358	0.0135029	0.0445932
-4.65168	-0.0826759	-0.0188202	0.151572	0.121999	0.0138116	-0.12581	-0.0204747	0.0616994	-0.0827979	-0.0257148	-0.0379992	0.000870315	-0.0449874	-0.021059	0.00711054	0.0135887	-0.00230718	0.0208957	-0.0449669	0.0172388	0.0135044	0.0445959
-4.6512	-0.0826894	-0.0187963	0.151587	0.121992	0.0138518	-0.125868	-0.02046	0.0617047	-0.082776	-0.0256797	-0.0379548	0.000870955	-0.044977	-0.02105	0.00712959	0.0135834	-0.00231218	0.0209019	-0.044951	0.0172418	0.0135059	0.0445985
-4.65072	-0.0827028	-0.0187725	0.151601	0.121985	0.0138919	-0.125927	-0.0204453	0.06171	-0.0827541	-0.0256445	-0.0379105	0.00087164	-0.0449667	-0.021041	0.00714866	0.0135782	-0.00231718	0.0209081	-0.0449351	0.0172448	0.0135075	0.0446011
-4.65024	-0.0827162	-0.0187486	0.151616	0.121977	0.0139321	-0.125985	-0.0204306	0.0617153	-0.0827323	-0.0256094	-0.0378661	0.000872347	-0.0449564	-0.0210321	0.00716775	0.0135729	-0.00232216	0.0209144	-0.0449191	0.0172478	0.0135089	0.0446037
-4.64976	-0.0827295	-0.0187247	0.15163	0.12197	0.0139722	-0.126044	-0.0204159	0.0617207	-0.0827104	-0.0255742	-0.0378218	0.000873111	-0.0449461	-0.0210231	0.00718685	0.0135677	-0.00232712	0.0209206	-0.0449032	0.0172508	0.0135104	0.0446062
-4.64928	-0.0827427	-0.0187007	0.151644	0.121963	0.0140124	-0.126102	-0.0204012	0.061726	-0.0826886	-0.0255391	-0.0377775	0.000873895	-0.0449357	-0.0210142	0.00720595	0.0135624	-0.00233207	0.0209268	-0.0448873	0.0172538	0.0135119	0.0446087
-4.6488	-0.0827559	-0.0186768	0.151659	0.121955	0.0140526	-0.126161	-0.0203865	0.0617313	-0.0826668	-0.0255039	-0.0377332	0.000874725	-0.0449254	-0.0210052	0.00722505	0.0135572	-0.002337	0.020933	-0.0448714	0.0172568	0.0135133	0.0446112
-4.64832	-0.082769	-0.0186528	0.151673	0.121948	0.0140928	-0.126219	-0.0203717	0.0617367	-0.082645	-0.0254688	-0.0376889	0.000875582	-0.0449151	-0.0209963	0.00724419	0.0135519	-0.00234192	0.0209393	-0.0448555	0.0172598	0.0135148	0.0446137
-4.64784	-0.0827821	-0.0186288	0.151687	0.12194	0.014133	-0.126277	-0.020357	0.061742	-0.0826231	-0.0254336	-0.0376447	0.000876493	-0.0449048	-0.0209874	0.00726332	0.0135467	-0.00234682	0.0209455	-0.0448396	0.0172628	0.0135162	0.0446162
-4.64736	-0.082795	-0.0186047	0.151702	0.121933	0.0141732	-0.126336	-0.0203423	0.0617474	-0.0826013	-0.0253985	-0.0376005	0.000877429	-0.0448945	-0.0209784	0.00728246	0.0135415	-0.00235171	0.0209518	-0.0448237	0.0172658	0.0135176	0.0446186
-4.64688	-0.0828079	-0.0185807	0.151716	0.121925	0.0142134	-0.126394	-0.0203275	0.0617528	-0.0825795	-0.0253634	-0.0375563	0.000878409	-0.0448842	-0.0209695	0.00730162	0.0135362	-0.00235658	0.020958	-0.0448078	0.0172688	0.013519	0.044621
-4.6464	-0.0828207	-0.0185566	0.15173	0.121917	0.0142536	-0.126452	-0.0203128	0.0617582	-0.0825577	-0.0253282	-0.0375121	0.000879414	-0.0448739	-0.0209606	0.00732078	0.013531	-0.00236144	0.0209642	-0.044792	0.0172718	0.0135204	0.0446234
-4.64592	-0.0828332	-0.0185326	0.151744	0.121909	0.0142938	-0.12651	-0.020298	0.0617636	-0.0825359	-0.0252931	-0.037468	0.000880471	-0.0448637	-0.0209516	0.00733994	0.0135257	-0.00236629	0.0209705	-0.0447761	0.0172748	0.0135218	0.0446257
-4.64544	-0.0828457	-0.0185084	0.151758	0.121902	0.014334	-0.126569	-0.0202833	0.0617689	-0.0825141	-0.025258	-0.0374239	0.000881574	-0.0448534	-0.0209427	0.00735914	0.0135205	-0.00237112	0.0209767	-0.0447602	0.0172777	0.0135231	0.044628
-4.64496	-0.082858	-0.0184843	0.151772	0.121894	0.0143742	-0.126627	-0.0202685	0.0617743	-0.0824923	-0.0252229	-0.0373798	0.000882707	-0.0448431	-0.0209338	0.00737832	0.0135152	-0.00237592	0.020983	-0.0447443	0.0172807	0.0135245	0.0446304
-4.64448	-0.0828701	-0.0184601	0.151786	0.121886	0.0144145	-0.126685	-0.0202537	0.0617798	-0.0824706	-0.0251877	-0.0373357	0.000883864	-0.0448328	-0.0209248	0.00739752	0.01351	-0.00238073	0.0209892	-0.0447285	0.0172837	0.0135258	0.0446326
-4.644	-0.0828822	-0.0184359	0.1518	0.121878	0.0144547	-0.126743	-0.020239	0.0617852	-0.0824488	-0.0251526	-0.0372917	0.000885101	-0.0448226	-0.0209159	0.00741672	0.0135048	-0.00238552	0.0209955	-0.0447126	0.0172867	0.0135271	0.0446349
-4.64352	-0.0828941	-0.0184117	0.151815	0.12187	0.0144949	-0.126801	-0.0202242	0.0617906	-0.082427	-0.0251175	-0.0372477	0.000886359	-0.0448123	-0.020907	0.00743595	0.0134995	-0.00239029	0.0210017	-0.0446967	0.0172896	0.0135284	0.0446371
-4.64304	-0.0829059	-0.0183875	0.151828	0.121862	0.0145352	-0.126859	-0.0202094	0.061796	-0.0824052	-0.0250824	-0.0372038	0.000887669	-0.044802	-0.0208981	0.00745517	0.0134943	-0.00239506	0.0210079	-0.0446809	0.0172926	0.0135297	0.0446393
-4.64256	-0.0829177	-0.0183632	0.151842	0.121853	0.0145754	-0.126917	-0.0201947	0.0618015	-0.0823835	-0.0250472	-0.0371598	0.000889037	-0.0447917	-0.0208892	0.00747441	0.013489	-0.0023998	0.0210142	-0.044665	0.0172955	0.013531	0.0446415
-4.64208	-0.0829293	-0.0183389	0.151856	0.121845	0.0146157	-0.126976	-0.0201799	0.0618069	-0.0823617	-0.0250121	-0.0371159	0.000890442	-0.0447815	-0.0208803	0.00749364	0.0134837	-0.00240454	0.0210204	-0.0446492	0.0172985	0.0135323	0.0446437
-4.6416	-0.082941	-0.0183146	0.15187	0.121837	0.0146559	-0.127034	-0.0201651	0.0618124	-0.08234	-0.024977	-0.0370721	0.000891876	-0.0447712	-0.0208714	0.0075129	0.0134785	-0.00240926	0.0210267	-0.0446333	0.0173014	0.0135335	0.0446458
-4.64112	-0.0829525	-0.0182903	0.151884	0.121829	0.0146962	-0.127092	-0.0201503	0.0618178	-0.0823182	-0.0249419	-0.0370283	0.000893339	-0.0447609	-0.0208625	0.00753215	0.0134732	-0.00241398	0.0210329	-0.0446174	0.0173043	0.0135348	0.044648
-4.64064	-0.0829639	-0.018266	0.151898	0.12182	0.0147365	-0.12715	-0.0201355	0.0618233	-0.0822965	-0.0249068	-0.0369844	0.000894836	-0.0447507	-0.0208536	0.00755143	0.0134679	-0.00241867	0.0210392	-0.0446016	0.0173072	0.013536	0.0446501
-4.64016	-0.0829753	-0.0182416	0.151912	0.121812	0.0147768	-0.127208	-0.0201207	0.0618288	-0.0822747	-0.0248717	-0.0369407	0.000896359	-0.0447404	-0.0208448	0.00757072	0.0134627	-0.00242337	0.0210454	-0.0445857	0.0173101	0.0135372	0.0446521
-4.63968	-0.0829865	-0.0182173	0.151925	0.121803	0.014817	-0.127266	-0.0201059	0.0618343	-0.082253	-0.0248365	-0.0368969	0.00089791	-0.0447302	-0.0208359	0.00759001	0.0134574	-0.00242804	0.0210517	-0.0445698	0.017313	0.0135384	0.0446542
-4.6392	-0.0829977	-0.0181929	0.151939	0.121795	0.0148573	-0.127324	-0.0200911	0.0618398	-0.0822312	-0.0248014	-0.0368533	0.000899488	-0.0447199	-0.0208271	0.00760929	0.0134522	-0.00243271	0.0210579	-0.0445539	0.0173159	0.0135396	0.0446562
-4.63872	-0.0830089	-0.0181685	0.151953	0.121786	0.0148977	-0.127382	-0.0200763	0.0618453	-0.0822095	-0.0247663	-0.0368096	0.000901102	-0.0447096	-0.0208183	0.00762862	0.0134469	-0.00243737	0.0210641	-0.044538	0.0173187	0.0135408	0.0446582
-4.63824	-0.0830199	-0.018144	0.151967	0.121778	0.014938	-0.12744	-0.0200615	0.0618508	-0.0821877	-0.0247312	-0.036766	0.00090277	-0.0446994	-0.0208094	0.00764793	0.0134416	-0.00244202	0.0210704	-0.0445221	0.0173216	0.0135419	0.0446602
-4.63776	-0.0830309	-0.0181195	0.15198	0.121769	0.0149783	-0.127498	-0.0200467	0.0618563	-0.082166	-0.0246961	-0.0367223	0.000904446	-0.0446892	-0.0208006	0.00766725	0.0134364	-0.00244665	0.0210767	-0.0445062	0.0173244	0.0135431	0.0446622
-4.63728	-0.0830418	-0.018095	0.151994	0.12176	0.0150186	-0.127556	-0.0200319	0.0618618	-0.0821442	-0.024661	-0.0366788	0.000906161	-0.0446789	-0.0207918	0.00768657	0.0134311	-0.00245127	0.0210829	-0.0444903	0.0173272	0.0135442	0.0446641
-4.6368	-0.0830527	-0.0180705	0.152007	0.121752	0.0150589	-0.127613	-0.0200171	0.0618674	-0.0821225	-0.0246258	-0.0366352	0.000907891	-0.0446687	-0.020783	0.00770592	0.0134258	-0.00245589	0.0210891	-0.0444744	0.0173301	0.0135453	0.044666
-4.63632	-0.0830634	-0.0180459	0.152021	0.121743	0.0150992	-0.127671	-0.0200022	0.0618729	-0.0821008	-0.0245907	-0.0365917	0.000909683	-0.0446584	-0.0207742	0.00772526	0.0134205	-0.00246049	0.0210954	-0.0444584	0.0173329	0.0135464	0.0446679
-4.63584	-0.0830741	-0.0180214	0.152034	0.121734	0.0151396	-0.127729	-0.0199874	0.0618785	-0.082079	-0.0245556	-0.0365482	0.000911454	-0.0446482	-0.0207654	0.00774462	0.0134153	-0.00246509	0.0211016	-0.0444425	0.0173357	0.0135475	0.0446698
-4.63536	-0.0830847	-0.0179968	0.152048	0.121725	0.0151799	-0.127787	-0.0199726	0.061884	-0.0820573	-0.0245205	-0.0365048	0.000913274	-0.044638	-0.0207566	0.00776397	0.01341	-0.00246966	0.0211079	-0.0444266	0.0173384	0.0135485	0.0446716
-4.63488	-0.0830953	-0.0179721	0.152061	0.121716	0.0152203	-0.127845	-0.0199578	0.0618896	-0.0820355	-0.0244854	-0.0364614	0.000915073	-0.0446277	-0.0207478	0.00778334	0.0134047	-0.00247423	0.0211142	-0.0444106	0.0173412	0.0135496	0.0446735
-4.6344	-0.0831057	-0.0179475	0.152075	0.121707	0.0152606	-0.127902	-0.019943	0.0618952	-0.0820138	-0.0244504	-0.036418	0.00091694	-0.0446175	-0.020739	0.0078027	0.0133994	-0.00247879	0.0211204	-0.0443947	0.017344	0.0135506	0.0446753
-4.63392	-0.0831161	-0.0179228	0.152088	0.121698	0.015301	-0.12796	-0.0199281	0.0619008	-0.081992	-0.0244153	-0.0363746	0.000918786	-0.0446073	-0.0207302	0.00782208	0.0133941	-0.00248334	0.0211267	-0.0443787	0.0173467	0.0135516	0.044677
-4.63344	-0.0831264	-0.0178981	0.152101	0.121689	0.0153414	-0.128018	-0.0199133	0.0619064	-0.0819702	-0.0243802	-0.0363313	0.000920689	-0.0445971	-0.0207214	0.00784146	0.0133888	-0.00248788	0.0211329	-0.0443628	0.0173495	0.0135526	0.0446788
-4.63296	-0.0831367	-0.0178734	0.152115	0.12168	0.0153817	-0.128076	-0.0198985	0.061912	-0.0819485	-0.0243451	-0.036288	0.0009226	-0.0445869	-0.0207126	0.00786086	0.0133835	-0.00249241	0.0211392	-0.0443468	0.0173522	0.0135536	0.0446806
-4.63248	-0.0831468	-0.0178486	0.152128	0.121671	0.0154221	-0.128133	-0.0198836	0.0619176	-0.0819267	-0.02431	-0.0362447	0.000924552	-0.0445767	-0.0207038	0.00788026	0.0133782	-0.00249694	0.0211455	-0.0443308	0.0173549	0.0135545	0.0446823
-4.632	-0.0831569	-0.0178238	0.152141	0.121661	0.0154625	-0.128191	-0.0198688	0.0619233	-0.0819049	-0.0242749	-0.0362014	0.000926472	-0.0445666	-0.020695	0.00789967	0.0133728	-0.00250144	0.0211517	-0.0443149	0.0173576	0.0135555	0.044684
-4.63152	-0.0831669	-0.017799	0.152154	0.121652	0.0155029	-0.128249	-0.0198539	0.0619289	-0.0818832	-0.0242399	-0.0361582	0.00092846	-0.0445564	-0.0206862	0.00791906	0.0133675	-0.00250596	0.021158	-0.0442989	0.0173604	0.0135564	0.0446857
-4.63104	-0.0831769	-0.0177742	0.152167	0.121643	0.0155433	-0.128306	-0.0198391	0.0619346	-0.0818614	-0.0242048	-0.036115	0.000930433	-0.0445462	-0.0206774	0.00793848	0.0133622	-0.00251045	0.0211643	-0.0442829	0.0173631	0.0135574	0.0446873
-4.63056	-0.083187	-0.0177493	0.152181	0.121633	0.0155837	-0.128364	-0.0198242	0.0619402	-0.0818396	-0.0241697	-0.0360718	0.000932454	-0.0445361	-0.0206686	0.00795788	0.0133569	-0.00251494	0.0211705	-0.0442668	0.0173657	0.0135582	0.044689
-4.63008	-0.083197	-0.0177244	0.152194	0.121624	0.0156242	-0.128422	-0.0198094	0.0619459	-0.0818179	-0.0241346	-0.0360287	0.000934468	-0.044526	-0.0206598	0.00797732	0.0133516	-0.00251941	0.0211768	-0.0442508	0.0173684	0.0135591	0.0446906
-4.6296	-0.0832071	-0.0176995	0.152207	0.121614	0.0156646	-0.128479	-0.0197945	0.0619516	-0.0817961	-0.0240996	-0.0359855	0.000936525	-0.0445158	-0.020651	0.00799672	0.0133463	-0.00252388	0.0211831	-0.0442348	0.0173711	0.01356	0.0446922
-4.62912	-0.0832172	-0.0176746	0.15222	0.121605	0.015705	-0.128537	-0.0197796	0.0619573	-0.0817744	-0.0240645	-0.0359424	0.000938598	-0.0445057	-0.0206422	0.00801614	0.013341	-0.00252835	0.0211893	-0.0442188	0.0173738	0.0135609	0.0446938
-4.62864	-0.0832273	-0.0176496	0.152233	0.121595	0.0157455	-0.128595	-0.0197647	0.061963	-0.0817527	-0.0240295	-0.0358993	0.00094069	-0.0444956	-0.0206334	0.00803557	0.0133357	-0.00253279	0.0211956	-0.0442027	0.0173764	0.0135617	0.0446954
-4.62816	-0.0832374	-0.0176246	0.152246	0.121586	0.0157859	-0.128652	-0.0197499	0.0619687	-0.081731	-0.0239944	-0.0358562	0.00094281	-0.0444855	-0.0206246	0.00805501	0.0133303	-0.00253723	0.0212019	-0.0441867	0.0173791	0.0135625	0.0446969
-4.62768	-0.0832474	-0.0175995	0.152259	0.121576	0.0158264	-0.12871	-0.019735	0.0619745	-0.0817092	-0.0239594	-0.0358131	0.00094497	-0.0444754	-0.0206158	0.00807444	0.013325	-0.00254167	0.0212082	-0.0441706	0.0173817	0.0135634	0.0446984
-4.6272	-0.0832574	-0.0175744	0.152272	0.121566	0.0158669	-0.128768	-0.0197201	0.0619802	-0.0816875	-0.0239244	-0.0357701	0.000947142	-0.0444653	-0.020607	0.00809389	0.0133197	-0.00254608	0.0212144	-0.0441545	0.0173843	0.0135642	0.0447
-4.62672	-0.0832673	-0.0175493	0.152285	0.121556	0.0159073	-0.128825	-0.0197052	0.0619859	-0.0816658	-0.0238893	-0.0357271	0.00094935	-0.0444552	-0.0205982	0.00811332	0.0133144	-0.00255049	0.0212207	-0.0441385	0.0173869	0.013565	0.0447015
-4.62624	-0.0832773	-0.0175242	0.152297	0.121546	0.0159478	-0.128883	-0.0196902	0.0619917	-0.0816442	-0.0238543	-0.0356841	0.000951598	-0.0444451	-0.0205894	0.00813278	0.013309	-0.0025549	0.021227	-0.0441224	0.0173895	0.0135657	0.0447029
-4.62576	-0.0832871	-0.017499	0.15231	0.121536	0.0159883	-0.12894	-0.0196753	0.0619975	-0.0816225	-0.0238193	-0.0356412	0.000953889	-0.0444351	-0.0205806	0.00815222	0.0133037	-0.00255929	0.0212333	-0.0441063	0.0173921	0.0135665	0.0447044
-4.62528	-0.0832969	-0.0174739	0.152323	0.121526	0.0160288	-0.128998	-0.0196604	0.0620032	-0.0816008	-0.0237843	-0.0355982	0.000956221	-0.044425	-0.0205718	0.00817169	0.0132983	-0.00256368	0.0212396	-0.0440902	0.0173946	0.0135673	0.0447059
-4.6248	-0.0833067	-0.0174487	0.152336	0.121516	0.0160693	-0.129055	-0.0196455	0.062009	-0.0815791	-0.0237493	-0.0355553	0.000958584	-0.0444149	-0.020563	0.00819112	0.013293	-0.00256804	0.0212459	-0.0440741	0.0173972	0.013568	0.0447073
-4.62432	-0.0833165	-0.0174234	0.152349	0.121506	0.0161098	-0.129113	-0.0196306	0.0620148	-0.0815575	-0.0237142	-0.0355124	0.000960976	-0.0444048	-0.0205542	0.00821059	0.0132876	-0.0025724	0.0212522	-0.044058	0.0173997	0.0135687	0.0447087
-4.62384	-0.0833261	-0.0173981	0.152361	0.121496	0.0161504	-0.12917	-0.0196157	0.0620206	-0.0815358	-0.0236792	-0.0354695	0.00096338	-0.0443948	-0.0205454	0.00823003	0.0132822	-0.00257675	0.0212585	-0.0440419	0.0174022	0.0135694	0.0447101
-4.62336	-0.0833358	-0.0173729	0.152374	0.121486	0.0161909	-0.129228	-0.0196007	0.0620264	-0.0815141	-0.0236442	-0.0354267	0.000965814	-0.0443847	-0.0205366	0.0082495	0.0132769	-0.00258109	0.0212648	-0.0440258	0.0174047	0.0135701	0.0447115
-4.62288	-0.0833455	-0.0173475	0.152387	0.121475	0.0162315	-0.129285	-0.0195858	0.0620322	-0.0814925	-0.0236092	-0.0353839	0.000968282	-0.0443747	-0.0205278	0.00826895	0.0132715	-0.00258542	0.0212711	-0.0440096	0.0174072	0.0135708	0.0447128
-4.6224	-0.083355	-0.0173222	0.152399	0.121465	0.016272	-0.129343	-0.0195709	0.062038	-0.0814708	-0.0235742	-0.0353411	0.000970793	-0.0443646	-0.0205189	0.00828841	0.0132661	-0.00258975	0.0212774	-0.0439935	0.0174097	0.0135715	0.0447142
-4.62192	-0.0833646	-0.0172969	0.152412	0.121455	0.0163126	-0.1294	-0.0195559	0.0620438	-0.0814492	-0.0235392	-0.0352984	0.000973318	-0.0443546	-0.0205101	0.00830786	0.0132607	-0.00259406	0.0212837	-0.0439774	0.0174121	0.0135722	0.0447155
-4.62144	-0.083374	-0.0172715	0.152424	0.121444	0.0163532	-0.129457	-0.0195409	0.0620497	-0.0814276	-0.0235042	-0.0352557	0.000975913	-0.0443446	-0.0205013	0.00832733	0.0132553	-0.00259836	0.0212901	-0.0439613	0.0174146	0.0135728	0.0447168
-4.62096	-0.0833834	-0.0172461	0.152437	0.121434	0.0163938	-0.129514	-0.019526	0.0620555	-0.0814059	-0.0234692	-0.035213	0.000978546	-0.0443345	-0.0204924	0.00834679	0.0132499	-0.00260265	0.0212964	-0.0439451	0.017417	0.0135734	0.0447181
-4.62048	-0.0833928	-0.0172207	0.152449	0.121423	0.0164344	-0.129572	-0.019511	0.0620613	-0.0813843	-0.0234342	-0.0351703	0.000981196	-0.0443245	-0.0204836	0.00836626	0.0132445	-0.00260694	0.0213027	-0.043929	0.0174194	0.0135741	0.0447194
-4.62	-0.083402	-0.0171953	0.152462	0.121412	0.016475	-0.129629	-0.019496	0.0620672	-0.0813626	-0.0233992	-0.0351277	0.000983889	-0.0443145	-0.0204747	0.00838571	0.0132391	-0.00261121	0.021309	-0.0439128	0.0174218	0.0135746	0.0447206
-4.61952	-0.0834112	-0.0171699	0.152474	0.121402	0.0165156	-0.129686	-0.0194811	0.0620731	-0.081341	-0.0233642	-0.0350851	0.000986613	-0.0443045	-0.0204658	0.00840519	0.0132337	-0.00261548	0.0213153	-0.0438967	0.0174242	0.0135752	0.0447219
-4.61904	-0.0834204	-0.0171444	0.152487	0.121391	0.0165562	-0.129743	-0.019466	0.0620789	-0.0813193	-0.0233293	-0.0350426	0.000989369	-0.0442945	-0.0204569	0.00842466	0.0132283	-0.00261973	0.0213216	-0.0438805	0.0174265	0.0135758	0.0447231
-4.61856	-0.0834295	-0.0171189	0.152499	0.12138	0.0165969	-0.129801	-0.019451	0.0620848	-0.0812977	-0.0232943	-0.0350001	0.000992132	-0.0442845	-0.020448	0.00844415	0.0132229	-0.00262397	0.021328	-0.0438644	0.0174289	0.0135763	0.0447243
-4.61808	-0.0834385	-0.0170934	0.152511	0.121369	0.0166375	-0.129858	-0.019436	0.0620907	-0.0812761	-0.0232593	-0.0349577	0.000994959	-0.0442745	-0.0204391	0.0084636	0.0132175	-0.0026282	0.0213343	-0.0438482	0.0174312	0.0135769	0.0447255
-4.6176	-0.0834474	-0.0170679	0.152524	0.121359	0.0166782	-0.129915	-0.019421	0.0620966	-0.0812544	-0.0232243	-0.0349152	0.000997792	-0.0442646	-0.0204302	0.00848309	0.013212	-0.00263242	0.0213406	-0.0438321	0.0174335	0.0135774	0.0447267
-4.61712	-0.0834563	-0.0170424	0.152536	0.121348	0.0167189	-0.129972	-0.0194059	0.0621025	-0.0812328	-0.0231894	-0.0348728	0.00100071	-0.0442546	-0.0204213	0.00850256	0.0132066	-0.00263662	0.021347	-0.0438159	0.0174358	0.0135779	0.0447278
-4.61664	-0.0834652	-0.0170168	0.152548	0.121337	0.0167595	-0.130029	-0.0193908	0.0621084	-0.0812111	-0.0231544	-0.0348304	0.00100363	-0.0442446	-0.0204124	0.00852207	0.0132012	-0.00264081	0.0213533	-0.0437997	0.0174381	0.0135784	0.044729
-4.61616	-0.0834741	-0.0169912	0.15256	0.121326	0.0168002	-0.130086	-0.0193758	0.0621144	-0.0811895	-0.0231195	-0.0347881	0.00100662	-0.0442347	-0.0204035	0.00854157	0.0131958	-0.00264499	0.0213596	-0.0437835	0.0174404	0.0135789	0.0447301
-4.61568	-0.0834829	-0.0169656	0.152573	0.121315	0.0168409	-0.130143	-0.0193607	0.0621203	-0.0811679	-0.0230846	-0.0347458	0.00100962	-0.0442247	-0.0203945	0.00856108	0.0131904	-0.00264916	0.021366	-0.0437674	0.0174426	0.0135793	0.0447312
-4.6152	-0.0834917	-0.01694	0.152585	0.121303	0.0168816	-0.1302	-0.0193456	0.0621262	-0.0811462	-0.0230496	-0.0347035	0.00101268	-0.0442148	-0.0203856	0.00858059	0.0131849	-0.00265332	0.0213723	-0.0437512	0.0174449	0.0135798	0.0447323
-4.61472	-0.0835005	-0.0169144	0.152597	0.121292	0.0169224	-0.130257	-0.0193305	0.0621322	-0.0811246	-0.0230147	-0.0346612	0.00101575	-0.0442048	-0.0203766	0.00860013	0.0131795	-0.00265748	0.0213787	-0.043735	0.0174471	0.0135802	0.0447334
-4.61424	-0.0835092	-0.0168887	0.152609	0.121281	0.0169631	-0.130314	-0.0193154	0.0621382	-0.0811029	-0.0229798	-0.034619	0.00101886	-0.0441949	-0.0203676	0.00861965	0.0131741	-0.00266162	0.021385	-0.0437188	0.0174493	0.0135806	0.0447345
-4.61376	-0.083518	-0.016863	0.152621	0.12127	0.0170038	-0.130371	-0.0193002	0.0621441	-0.0810813	-0.0229449	-0.0345767	0.00102198	-0.0441849	-0.0203586	0.00863921	0.0131686	-0.00266574	0.0213914	-0.0437027	0.0174516	0.013581	0.0447355
-4.61328	-0.0835267	-0.0168373	0.152633	0.121259	0.0170446	-0.130428	-0.0192851	0.0621501	-0.0810597	-0.02291	-0.0345345	0.00102515	-0.044175	-0.0203496	0.00865874	0.0131632	-0.00266986	0.0213977	-0.0436865	0.0174538	0.0135814	0.0447366
-4.6128	-0.0835354	-0.0168116	0.152645	0.121247	0.0170853	-0.130484	-0.0192699	0.0621561	-0.081038	-0.0228751	-0.0344923	0.00102833	-0.0441651	-0.0203406	0.0086783	0.0131578	-0.00267397	0.0214041	-0.0436703	0.0174559	0.0135818	0.0447376
-4.61232	-0.083544	-0.0167859	0.152657	0.121236	0.0171261	-0.130541	-0.0192548	0.0621621	-0.0810164	-0.0228402	-0.0344502	0.00103157	-0.0441552	-0.0203315	0.00869784	0.0131523	-0.00267807	0.0214105	-0.0436541	0.0174581	0.0135822	0.0447387
-4.61184	-0.0835527	-0.0167601	0.152669	0.121224	0.0171669	-0.130598	-0.0192396	0.0621681	-0.0809948	-0.0228053	-0.0344081	0.0010348	-0.0441453	-0.0203224	0.0087174	0.0131469	-0.00268215	0.0214168	-0.0436379	0.0174602	0.0135825	0.0447397
-4.61136	-0.0835612	-0.0167343	0.152681	0.121213	0.0172077	-0.130654	-0.0192245	0.0621741	-0.0809731	-0.0227705	-0.034366	0.00103808	-0.0441354	-0.0203133	0.00873695	0.0131415	-0.00268623	0.0214231	-0.0436217	0.0174624	0.0135829	0.0447407
-4.61088	-0.0835697	-0.0167085	0.152693	0.121201	0.0172485	-0.130711	-0.0192093	0.0621802	-0.0809515	-0.0227356	-0.0343239	0.00104139	-0.0441255	-0.0203042	0.00875651	0.013136	-0.0026903	0.0214295	-0.0436055	0.0174645	0.0135832	0.0447416
-4.6104	-0.0835782	-0.0166827	0.152705	0.12119	0.0172893	-0.130768	-0.0191942	0.0621862	-0.0809299	-0.0227008	-0.0342819	0.00104473	-0.0441156	-0.0202951	0.00877606	0.0131306	-0.00269435	0.0214358	-0.0435893	0.0174666	0.0135835	0.0447426
-4.60992	-0.0835866	-0.0166568	0.152717	0.121178	0.0173301	-0.130824	-0.019179	0.0621922	-0.0809083	-0.022666	-0.0342399	0.00104808	-0.0441057	-0.020286	0.00879563	0.0131252	-0.0026984	0.0214422	-0.0435731	0.0174686	0.0135838	0.0447436
-4.60944	-0.083595	-0.0166309	0.152728	0.121167	0.017371	-0.130881	-0.0191638	0.0621983	-0.0808867	-0.0226312	-0.0341979	0.00105149	-0.0440958	-0.0202768	0.00881518	0.0131197	-0.00270242	0.0214485	-0.0435569	0.0174707	0.0135841	0.0447445
-4.60896	-0.0836032	-0.016605	0.15274	0.121155	0.0174118	-0.130938	-0.0191486	0.0622044	-0.080865	-0.0225963	-0.0341559	0.00105493	-0.0440859	-0.0202677	0.00883474	0.0131143	-0.00270644	0.0214549	-0.0435407	0.0174727	0.0135843	0.0447454
-4.60848	-0.0836114	-0.0165791	0.152752	0.121143	0.0174527	-0.130994	-0.0191334	0.0622104	-0.0808434	-0.0225616	-0.034114	0.00105842	-0.044076	-0.0202585	0.0088543	0.0131088	-0.00271044	0.0214613	-0.0435245	0.0174747	0.0135846	0.0447463
-4.608	-0.0836195	-0.0165532	0.152764	0.121132	0.0174935	-0.131051	-0.0191182	0.0622165	-0.0808218	-0.0225268	-0.0340721	0.00106194	-0.0440661	-0.0202492	0.00887386	0.0131034	-0.00271443	0.0214676	-0.0435083	0.0174767	0.0135848	0.0447472
-4.60752	-0.0836276	-0.0165272	0.152775	0.12112	0.0175344	-0.131107	-0.019103	0.0622226	-0.0808001	-0.022492	-0.0340302	0.00106553	-0.0440562	-0.02024	0.00889342	0.0130979	-0.00271841	0.021474	-0.0434921	0.0174787	0.013585	0.0447481
-4.60704	-0.0836356	-0.0165012	0.152787	0.121108	0.0175753	-0.131164	-0.0190877	0.0622287	-0.0807785	-0.0224572	-0.0339884	0.0010691	-0.0440464	-0.0202308	0.00891298	0.0130925	-0.00272237	0.0214803	-0.043476	0.0174806	0.0135852	0.044749
-4.60656	-0.0836435	-0.0164752	0.152799	0.121096	0.0176162	-0.13122	-0.0190725	0.0622348	-0.0807568	-0.0224225	-0.0339465	0.00107274	-0.0440365	-0.0202215	0.00893254	0.013087	-0.00272631	0.0214867	-0.0434598	0.0174826	0.0135854	0.0447498
-4.60608	-0.0836514	-0.0164491	0.15281	0.121085	0.0176571	-0.131277	-0.0190573	0.0622409	-0.0807352	-0.0223878	-0.0339047	0.00107641	-0.0440266	-0.0202122	0.0089521	0.0130816	-0.00273024	0.021493	-0.0434436	0.0174845	0.0135856	0.0447506
-4.6056	-0.0836594	-0.016423	0.152822	0.121073	0.017698	-0.131333	-0.019042	0.062247	-0.0807135	-0.0223531	-0.033863	0.00108013	-0.0440167	-0.0202029	0.00897166	0.0130761	-0.00273417	0.0214994	-0.0434274	0.0174864	0.0135858	0.0447515
-4.60512	-0.0836673	-0.0163969	0.152834	0.121061	0.017739	-0.131389	-0.0190267	0.0622531	-0.0806919	-0.0223184	-0.0338212	0.00108385	-0.0440069	-0.0201936	0.00899122	0.0130707	-0.00273807	0.0215057	-0.0434112	0.0174883	0.0135859	0.0447523
-4.60464	-0.0836752	-0.0163708	0.152845	0.121049	0.0177799	-0.131446	-0.0190115	0.0622592	-0.0806702	-0.0222837	-0.0337795	0.00108761	-0.043997	-0.0201843	0.00901077	0.0130653	-0.00274196	0.0215121	-0.043395	0.0174901	0.013586	0.0447531
-4.60416	-0.083683	-0.0163447	0.152857	0.121037	0.0178208	-0.131502	-0.0189962	0.0622654	-0.0806486	-0.022249	-0.0337377	0.00109139	-0.0439871	-0.0201749	0.00903033	0.0130599	-0.00274582	0.0215185	-0.0433788	0.017492	0.0135862	0.0447539
-4.60368	-0.0836908	-0.0163185	0.152868	0.121025	0.0178618	-0.131558	-0.0189808	0.0622715	-0.0806269	-0.0222143	-0.033696	0.00109519	-0.0439773	-0.0201656	0.00904989	0.0130545	-0.00274968	0.0215248	-0.0433626	0.0174938	0.0135862	0.0447547
-4.6032	-0.0836985	-0.0162923	0.15288	0.121013	0.0179028	-0.131614	-0.0189655	0.0622777	-0.0806052	-0.0221796	-0.0336544	0.00109903	-0.0439674	-0.0201562	0.00906944	0.0130491	-0.00275352	0.0215312	-0.0433464	0.0174956	0.0135863	0.0447554
-4.60272	-0.0837062	-0.0162661	0.152891	0.121001	0.0179437	-0.131671	-0.0189502	0.0622838	-0.0805835	-0.022145	-0.0336128	0.00110287	-0.0439576	-0.0201468	0.00908901	0.0130437	-0.00275735	0.0215376	-0.0433302	0.0174974	0.0135864	0.0447562
-4.60224	-0.0837137	-0.0162398	0.152903	0.120989	0.0179847	-0.131727	-0.0189348	0.06229	-0.0805618	-0.0221104	-0.0335711	0.00110675	-0.0439477	-0.0201375	0.00910856	0.0130383	-0.00276115	0.021544	-0.043314	0.0174992	0.0135864	0.0447569
-4.60176	-0.0837212	-0.0162136	0.152914	0.120977	0.0180257	-0.131783	-0.0189194	0.0622962	-0.0805401	-0.0220757	-0.0335295	0.00111067	-0.0439379	-0.0201281	0.00912812	0.0130329	-0.00276494	0.0215504	-0.0432978	0.0175009	0.0135865	0.0447576
-4.60128	-0.0837286	-0.0161873	0.152925	0.120965	0.0180667	-0.131839	-0.018904	0.0623024	-0.0805185	-0.0220411	-0.0334879	0.00111462	-0.043928	-0.0201187	0.00914768	0.0130275	-0.00276872	0.0215567	-0.0432816	0.0175027	0.0135865	0.0447583
-4.6008	-0.0837359	-0.016161	0.152937	0.120953	0.0181077	-0.131895	-0.0188885	0.0623085	-0.0804968	-0.0220065	-0.0334464	0.00111859	-0.0439182	-0.0201093	0.00916723	0.0130221	-0.00277249	0.0215631	-0.0432654	0.0175044	0.0135865	0.044759
-4.60032	-0.0837431	-0.0161347	0.152948	0.12094	0.0181487	-0.131951	-0.018873	0.0623147	-0.0804751	-0.0219719	-0.0334048	0.0011226	-0.0439083	-0.0200999	0.0091868	0.0130168	-0.00277623	0.0215695	-0.0432492	0.0175061	0.0135865	0.0447597
-4.59984	-0.0837503	-0.0161083	0.152959	0.120928	0.0181898	-0.132007	-0.0188576	0.0623209	-0.0804533	-0.0219373	-0.0333633	0.00112663	-0.0438985	-0.0200904	0.00920636	0.0130114	-0.00277997	0.0215759	-0.043233	0.0175077	0.0135864	0.0447604
-4.59936	-0.0837573	-0.0160819	0.152971	0.120916	0.0182308	-0.132063	-0.0188421	0.0623272	-0.0804316	-0.0219027	-0.0333218	0.0011307	-0.0438887	-0.020081	0.00922593	0.013006	-0.00278368	0.0215823	-0.0432168	0.0175094	0.0135864	0.0447611
-4.59888	-0.0837643	-0.0160556	0.152982	0.120904	0.0182718	-0.132119	-0.0188266	0.0623334	-0.0804099	-0.0218681	-0.0332803	0.0011348	-0.0438789	-0.0200715	0.00924549	0.0130007	-0.00278738	0.0215887	-0.0432006	0.017511	0.0135863	0.0447617
-4.5984	-0.0837712	-0.0160291	0.152993	0.120891	0.0183129	-0.132175	-0.018811	0.0623396	-0.0803882	-0.0218336	-0.0332389	0.00113892	-0.043869	-0.0200621	0.00926507	0.0129953	-0.00279105	0.0215951	-0.0431845	0.0175126	0.0135863	0.0447624
-4.59792	-0.0837781	-0.0160027	0.153004	0.120879	0.018354	-0.132231	-0.0187955	0.0623458	-0.0803665	-0.021799	-0.0331975	0.00114308	-0.0438592	-0.0200526	0.00928462	0.0129899	-0.00279471	0.0216015	-0.0431683	0.0175142	0.0135862	0.044763
-4.59744	-0.0837849	-0.0159762	0.153015	0.120867	0.018395	-0.132286	-0.0187799	0.0623521	-0.0803447	-0.0217645	-0.0331561	0.00114727	-0.0438494	-0.0200431	0.0093042	0.0129845	-0.00279835	0.0216079	-0.0431521	0.0175158	0.0135861	0.0447636
-4.59696	-0.0837916	-0.0159497	0.153027	0.120855	0.0184361	-0.132342	-0.0187643	0.0623583	-0.080323	-0.0217299	-0.0331147	0.00115148	-0.0438396	-0.0200335	0.00932379	0.0129792	-0.00280197	0.0216144	-0.0431359	0.0175173	0.013586	0.0447643
-4.59648	-0.0837982	-0.0159231	0.153038	0.120842	0.0184772	-0.132398	-0.0187487	0.0623646	-0.0803012	-0.0216954	-0.0330733	0.00115573	-0.0438298	-0.020024	0.00934337	0.0129738	-0.00280558	0.0216208	-0.0431197	0.0175189	0.0135858	0.0447649
-4.596	-0.0838047	-0.0158965	0.153049	0.12083	0.0185184	-0.132454	-0.0187331	0.0623709	-0.0802795	-0.0216608	-0.033032	0.00116001	-0.04382	-0.0200145	0.00936296	0.0129684	-0.00280917	0.0216272	-0.0431035	0.0175204	0.0135857	0.0447655
-4.59552	-0.0838112	-0.0158699	0.15306	0.120817	0.0185595	-0.13251	-0.0187174	0.0623772	-0.0802578	-0.0216263	-0.0329907	0.00116431	-0.0438102	-0.0200049	0.00938255	0.0129631	-0.00281273	0.0216337	-0.0430873	0.0175219	0.0135855	0.0447661
-4.59504	-0.0838176	-0.0158433	0.153071	0.120805	0.0186006	-0.132566	-0.0187018	0.0623834	-0.080236	-0.0215918	-0.0329495	0.00116863	-0.0438004	-0.0199953	0.00940214	0.0129577	-0.00281628	0.0216401	-0.0430712	0.0175234	0.0135853	0.0447666
-4.59456	-0.083824	-0.0158166	0.153082	0.120793	0.0186418	-0.132621	-0.0186861	0.0623897	-0.0802142	-0.0215573	-0.0329082	0.00117299	-0.0437906	-0.0199858	0.00942175	0.0129523	-0.00281981	0.0216465	-0.043055	0.0175249	0.0135851	0.0447672
-4.59408	-0.0838302	-0.0157899	0.153093	0.12078	0.018683	-0.132677	-0.0186705	0.062396	-0.0801924	-0.0215228	-0.032867	0.00117737	-0.0437808	-0.0199762	0.00944133	0.012947	-0.00282332	0.0216529	-0.0430388	0.0175263	0.0135849	0.0447678
-4.5936	-0.0838364	-0.0157632	0.153104	0.120768	0.0187241	-0.132733	-0.0186548	0.0624024	-0.0801707	-0.0214883	-0.0328259	0.00118177	-0.043771	-0.0199666	0.00946094	0.0129416	-0.0028268	0.0216594	-0.0430227	0.0175278	0.0135847	0.0447684
-4.59312	-0.0838425	-0.0157364	0.153115	0.120755	0.0187653	-0.132789	-0.0186391	0.0624087	-0.0801489	-0.0214538	-0.0327847	0.00118622	-0.0437613	-0.0199569	0.00948054	0.0129363	-0.00283028	0.0216658	-0.0430065	0.0175292	0.0135845	0.0447689
-4.59264	-0.0838486	-0.0157096	0.153126	0.120743	0.0188065	-0.132844	-0.0186234	0.0624151	-0.0801272	-0.0214193	-0.0327437	0.00119071	-0.0437515	-0.0199473	0.00950016	0.0129309	-0.00283373	0.0216722	-0.0429904	0.0175306	0.0135842	0.0447694
-4.59216	-0.0838545	-0.0156828	0.153136	0.12073	0.0188477	-0.1329	-0.0186076	0.0624214	-0.0801054	-0.0213849	-0.0327025	0.00119523	-0.0437417	-0.0199377	0.00951975	0.0129255	-0.00283717	0.0216787	-0.0429742	0.017532	0.013584	0.04477
-4.59168	-0.0838604	-0.015656	0.153147	0.120718	0.018889	-0.132956	-0.0185918	0.0624278	-0.0800836	-0.0213504	-0.0326615	0.00119979	-0.0437319	-0.0199281	0.00953938	0.0129202	-0.00284058	0.0216851	-0.042958	0.0175334	0.0135837	0.0447705
-4.5912	-0.0838661	-0.0156291	0.153158	0.120705	0.0189302	-0.133011	-0.0185761	0.0624341	-0.0800618	-0.0213159	-0.0326205	0.00120437	-0.0437221	-0.0199184	0.00955897	0.0129149	-0.00284397	0.0216915	-0.0429419	0.0175348	0.0135834	0.044771
-4.59072	-0.0838718	-0.0156022	0.153169	0.120693	0.0189715	-0.133067	-0.0185602	0.0624405	-0.0800401	-0.0212814	-0.0325795	0.00120899	-0.0437124	-0.0199087	0.00957861	0.0129095	-0.00284735	0.021698	-0.0429257	0.0175361	0.0135831	0.0447715
-4.59024	-0.0838773	-0.0155752	0.15318	0.12068	0.0190127	-0.133123	-0.0185444	0.0624469	-0.0800183	-0.021247	-0.0325385	0.00121365	-0.0437026	-0.0198991	0.00959822	0.0129041	-0.0028507	0.0217044	-0.0429096	0.0175375	0.0135828	0.044772
-4.58976	-0.0838827	-0.0155483	0.15319	0.120667	0.019054	-0.133178	-0.0185285	0.0624533	-0.0799966	-0.0212125	-0.0324975	0.00121833	-0.0436929	-0.0198894	0.00961783	0.0128988	-0.00285403	0.0217108	-0.0428935	0.0175388	0.0135825	0.0447725
-4.58928	-0.0838879	-0.0155213	0.153201	0.120655	0.0190953	-0.133234	-0.0185127	0.0624597	-0.0799748	-0.021178	-0.0324566	0.00122306	-0.0436831	-0.0198797	0.00963744	0.0128934	-0.00285734	0.0217173	-0.0428773	0.0175401	0.0135822	0.0447729
-4.5888	-0.0838929	-0.0154942	0.153212	0.120642	0.0191366	-0.13329	-0.0184968	0.0624661	-0.079953	-0.0211436	-0.0324156	0.00122781	-0.0436733	-0.01987	0.00965708	0.0128881	-0.00286063	0.0217237	-0.0428612	0.0175414	0.0135818	0.0447734
-4.58832	-0.0838979	-0.0154672	0.153222	0.12063	0.0191779	-0.133345	-0.0184808	0.0624725	-0.0799312	-0.0211092	-0.0323748	0.00123261	-0.0436636	-0.0198603	0.0096767	0.0128827	-0.00286389	0.0217301	-0.042845	0.0175427	0.0135814	0.0447738
-4.58784	-0.0839027	-0.0154401	0.153233	0.120617	0.0192192	-0.133401	-0.0184649	0.0624789	-0.0799095	-0.0210747	-0.0323338	0.00123744	-0.0436538	-0.0198505	0.00969636	0.0128773	-0.00286714	0.0217365	-0.0428289	0.017544	0.0135811	0.0447743
-4.58736	-0.0839074	-0.015413	0.153244	0.120604	0.0192606	-0.133457	-0.0184489	0.0624853	-0.0798877	-0.0210403	-0.032293	0.0012423	-0.0436441	-0.0198407	0.00971599	0.0128719	-0.00287036	0.021743	-0.0428128	0.0175452	0.0135807	0.0447747
-4.58688	-0.0839121	-0.0153858	0.153254	0.120591	0.0193019	-0.133512	-0.0184329	0.0624918	-0.0798659	-0.0210059	-0.0322521	0.00124719	-0.0436344	-0.0198309	0.00973566	0.0128665	-0.00287356	0.0217494	-0.0427967	0.0175464	0.0135803	0.0447751
-4.5864	-0.0839166	-0.0153586	0.153265	0.120579	0.0193433	-0.133568	-0.0184169	0.0624982	-0.0798442	-0.0209715	-0.0322113	0.00125213	-0.0436246	-0.0198211	0.0097553	0.0128611	-0.00287674	0.0217558	-0.0427805	0.0175477	0.0135799	0.0447755
-4.58592	-0.0839211	-0.0153314	0.153275	0.120566	0.0193847	-0.133624	-0.0184008	0.0625047	-0.0798224	-0.0209371	-0.0321705	0.00125709	-0.0436149	-0.0198113	0.00977496	0.0128557	-0.0028799	0.0217623	-0.0427644	0.0175489	0.0135794	0.0447759
-4.58544	-0.0839254	-0.0153042	0.153286	0.120553	0.0194261	-0.133679	-0.0183847	0.0625112	-0.0798006	-0.0209027	-0.0321298	0.00126209	-0.0436052	-0.0198014	0.0097946	0.0128504	-0.00288303	0.0217687	-0.0427483	0.0175501	0.013579	0.0447763
-4.58496	-0.0839296	-0.0152769	0.153296	0.12054	0.0194674	-0.133735	-0.0183686	0.0625176	-0.0797789	-0.0208683	-0.032089	0.00126712	-0.0435955	-0.0197916	0.00981428	0.0128449	-0.00288615	0.0217751	-0.0427322	0.0175512	0.0135785	0.0447767
-4.58448	-0.0839337	-0.0152496	0.153306	0.120527	0.0195089	-0.133791	-0.0183525	0.0625241	-0.0797571	-0.020834	-0.0320483	0.0012722	-0.0435858	-0.0197817	0.00983394	0.0128396	-0.00288924	0.0217815	-0.042716	0.0175524	0.0135781	0.0447771
-4.584	-0.0839377	-0.0152222	0.153317	0.120514	0.0195503	-0.133846	-0.0183364	0.0625306	-0.0797353	-0.0207996	-0.0320075	0.0012773	-0.043576	-0.0197718	0.00985362	0.0128341	-0.00289231	0.0217879	-0.0426999	0.0175536	0.0135776	0.0447775
-4.58352	-0.0839414	-0.0151948	0.153327	0.120501	0.0195917	-0.133902	-0.0183202	0.0625371	-0.0797135	-0.0207653	-0.0319668	0.00128245	-0.0435663	-0.0197619	0.00987329	0.0128287	-0.00289536	0.0217943	-0.0426838	0.0175547	0.0135771	0.0447778
-4.58304	-0.0839452	-0.0151674	0.153338	0.120488	0.0196331	-0.133958	-0.018304	0.0625436	-0.0796917	-0.0207309	-0.0319261	0.00128759	-0.0435566	-0.019752	0.00989298	0.0128233	-0.00289839	0.0218008	-0.0426677	0.0175558	0.0135766	0.0447782
-4.58256	-0.0839487	-0.0151399	0.153348	0.120475	0.0196746	-0.134013	-0.0182878	0.0625501	-0.0796699	-0.0206966	-0.0318854	0.00129277	-0.0435469	-0.0197421	0.00991267	0.0128179	-0.00290139	0.0218072	-0.0426516	0.0175569	0.0135761	0.0447785
-4.58208	-0.0839522	-0.0151123	0.153358	0.120462	0.0197161	-0.134069	-0.0182715	0.0625566	-0.0796481	-0.0206623	-0.0318447	0.00129796	-0.0435373	-0.0197322	0.00993237	0.0128125	-0.00290438	0.0218136	-0.0426355	0.017558	0.0135755	0.0447788
-4.5816	-0.0839555	-0.0150848	0.153368	0.120449	0.0197575	-0.134125	-0.0182552	0.0625632	-0.0796263	-0.020628	-0.031804	0.0013032	-0.0435276	-0.0197223	0.00995205	0.0128071	-0.00290735	0.02182	-0.0426194	0.0175591	0.013575	0.0447792
-4.58112	-0.0839587	-0.0150572	0.153379	0.120436	0.019799	-0.13418	-0.0182389	0.0625697	-0.0796045	-0.0205937	-0.0317633	0.00130843	-0.0435179	-0.0197124	0.00997178	0.0128016	-0.00291028	0.0218265	-0.0426033	0.0175602	0.0135744	0.0447795
-4.58064	-0.0839618	-0.0150295	0.153389	0.120423	0.0198405	-0.134236	-0.0182225	0.0625763	-0.0795827	-0.0205594	-0.0317227	0.00131369	-0.0435082	-0.0197025	0.00999149	0.0127962	-0.00291321	0.0218329	-0.0425872	0.0175613	0.0135738	0.0447798
-4.58016	-0.0839647	-0.0150019	0.153399	0.12041	0.019882	-0.134292	-0.0182062	0.0625828	-0.079561	-0.0205252	-0.031682	0.00131897	-0.0434985	-0.0196926	0.0100112	0.0127907	-0.00291611	0.0218394	-0.0425711	0.0175623	0.0135732	0.0447801
-4.57968	-0.0839676	-0.0149742	0.153409	0.120397	0.0199235	-0.134348	-0.0181898	0.0625894	-0.0795391	-0.0204909	-0.0316414	0.00132424	-0.0434889	-0.0196827	0.0100309	0.0127853	-0.00291899	0.0218458	-0.042555	0.0175634	0.0135726	0.0447804
-4.5792	-0.0839703	-0.0149464	0.153419	0.120383	0.0199651	-0.134403	-0.0181734	0.062596	-0.0795174	-0.0204567	-0.0316007	0.00132952	-0.0434792	-0.0196727	0.0100507	0.0127798	-0.00292185	0.0218522	-0.0425389	0.0175644	0.013572	0.0447806
-4.57872	-0.083973	-0.0149186	0.153429	0.12037	0.0200066	-0.134459	-0.0181569	0.0626026	-0.0794956	-0.0204225	-0.0315602	0.00133483	-0.0434695	-0.0196627	0.0100704	0.0127744	-0.00292468	0.0218587	-0.0425228	0.0175654	0.0135714	0.0447809
-4.57824	-0.0839756	-0.0148908	0.153439	0.120357	0.0200482	-0.134515	-0.0181405	0.0626092	-0.0794738	-0.0203883	-0.0315196	0.00134011	-0.0434599	-0.0196528	0.0100902	0.0127689	-0.0029275	0.0218651	-0.0425067	0.0175664	0.0135707	0.0447812
-4.57776	-0.083978	-0.0148629	0.153449	0.120343	0.0200897	-0.134571	-0.018124	0.0626158	-0.079452	-0.0203541	-0.031479	0.00134543	-0.0434502	-0.0196428	0.0101099	0.0127634	-0.00293029	0.0218716	-0.0424907	0.0175674	0.0135701	0.0447814
-4.57728	-0.0839803	-0.014835	0.153459	0.12033	0.0201313	-0.134626	-0.0181074	0.0626225	-0.0794302	-0.0203199	-0.0314385	0.00135073	-0.0434406	-0.0196328	0.0101297	0.0127579	-0.00293305	0.021878	-0.0424746	0.0175684	0.0135694	0.0447817
-4.5768	-0.0839825	-0.0148071	0.153469	0.120316	0.0201729	-0.134682	-0.0180909	0.0626291	-0.0794084	-0.0202857	-0.0313979	0.00135606	-0.043431	-0.0196228	0.0101495	0.0127525	-0.0029358	0.0218845	-0.0424586	0.0175693	0.0135687	0.0447819
-4.57632	-0.0839846	-0.0147791	0.153479	0.120303	0.0202145	-0.134738	-0.0180743	0.0626357	-0.0793866	-0.0202516	-0.0313574	0.00136141	-0.0434213	-0.0196129	0.0101693	0.012747	-0.00293852	0.0218909	-0.0424425	0.0175702	0.013568	0.0447821
-4.57584	-0.0839866	-0.0147511	0.153489	0.120289	0.0202561	-0.134794	-0.0180577	0.0626424	-0.0793648	-0.0202174	-0.031317	0.00136675	-0.0434117	-0.0196028	0.0101891	0.0127415	-0.00294124	0.0218974	-0.0424264	0.0175712	0.0135672	0.0447824
-4.57536	-0.0839885	-0.0147231	0.153499	0.120276	0.0202978	-0.13485	-0.0180411	0.062649	-0.079343	-0.0201833	-0.0312765	0.00137211	-0.0434021	-0.0195929	0.010209	0.012736	-0.00294392	0.0219038	-0.0424104	0.0175721	0.0135665	0.0447826
-4.57488	-0.0839903	-0.014695	0.153508	0.120262	0.0203394	-0.134906	-0.0180245	0.0626557	-0.0793212	-0.0201491	-0.031236	0.00137749	-0.0433925	-0.0195829	0.0102288	0.0127305	-0.00294659	0.0219103	-0.0423943	0.0175729	0.0135657	0.0447828
-4.5744	-0.083992	-0.0146669	0.153518	0.120248	0.020381	-0.134961	-0.0180078	0.0626624	-0.0792993	-0.020115	-0.0311956	0.00138289	-0.0433829	-0.0195729	0.0102487	0.012725	-0.00294923	0.0219168	-0.0423783	0.0175738	0.0135649	0.044783
-4.57392	-0.0839936	-0.0146388	0.153528	0.120235	0.0204227	-0.135017	-0.0179911	0.0626691	-0.0792775	-0.0200809	-0.0311552	0.00138829	-0.0433733	-0.0195629	0.0102685	0.0127195	-0.00295185	0.0219232	-0.0423622	0.0175746	0.0135641	0.0447832
-4.57344	-0.083995	-0.0146106	0.153538	0.120221	0.0204644	-0.135073	-0.0179744	0.0626758	-0.0792557	-0.0200468	-0.0311149	0.0013937	-0.0433637	-0.0195529	0.0102884	0.0127141	-0.00295445	0.0219297	-0.0423462	0.0175755	0.0135633	0.0447834
-4.57296	-0.0839964	-0.0145824	0.153547	0.120207	0.0205061	-0.135129	-0.0179577	0.0626825	-0.0792338	-0.0200127	-0.0310745	0.00139914	-0.0433541	-0.0195429	0.0103083	0.0127086	-0.00295703	0.0219362	-0.0423301	0.0175763	0.0135625	0.0447836
-4.57248	-0.0839976	-0.0145542	0.153557	0.120193	0.0205478	-0.135185	-0.0179409	0.0626892	-0.079212	-0.0199786	-0.0310342	0.00140458	-0.0433446	-0.019533	0.0103282	0.0127031	-0.0029596	0.0219427	-0.0423141	0.0175771	0.0135617	0.0447838
-4.572	-0.0839985	-0.0145259	0.153567	0.120179	0.0205895	-0.135241	-0.0179241	0.0626959	-0.0791902	-0.0199445	-0.0309939	0.00141004	-0.043335	-0.019523	0.0103481	0.0126976	-0.00296214	0.0219492	-0.042298	0.0175779	0.0135608	0.044784
-4.57152	-0.0839993	-0.0144976	0.153576	0.120165	0.0206312	-0.135297	-0.0179073	0.0627026	-0.0791684	-0.0199104	-0.0309536	0.00141552	-0.0433254	-0.019513	0.010368	0.0126921	-0.00296466	0.0219557	-0.042282	0.0175787	0.0135599	0.0447841
-4.57104	-0.084	-0.0144692	0.153586	0.120151	0.020673	-0.135353	-0.0178905	0.0627094	-0.0791465	-0.0198764	-0.0309134	0.00142101	-0.0433159	-0.019503	0.0103879	0.0126866	-0.00296716	0.0219622	-0.0422659	0.0175794	0.013559	0.0447843
-4.57056	-0.0840005	-0.0144408	0.153595	0.120137	0.0207147	-0.135409	-0.0178736	0.0627162	-0.0791247	-0.0198423	-0.0308731	0.00142651	-0.0433063	-0.019493	0.0104079	0.0126811	-0.00296964	0.0219687	-0.0422499	0.0175802	0.0135581	0.0447844
-4.57008	-0.0840009	-0.0144124	0.153605	0.120123	0.0207565	-0.135465	-0.0178568	0.0627229	-0.0791029	-0.0198083	-0.0308329	0.00143202	-0.0432968	-0.0194831	0.0104278	0.0126756	-0.0029721	0.0219752	-0.0422339	0.0175809	0.0135572	0.0447845
-4.5696	-0.0840012	-0.014384	0.153614	0.120109	0.0207983	-0.135521	-0.0178399	0.0627297	-0.0790811	-0.0197742	-0.0307928	0.00143755	-0.0432873	-0.0194731	0.0104478	0.0126701	-0.00297454	0.0219818	-0.0422178	0.0175817	0.0135562	0.0447847
-4.56912	-0.0840014	-0.0143554	0.153624	0.120095	0.0208401	-0.135577	-0.0178229	0.0627365	-0.0790592	-0.0197402	-0.0307526	0.00144311	-0.0432777	-0.0194631	0.0104678	0.0126647	-0.00297696	0.0219883	-0.0422018	0.0175824	0.0135553	0.0447848
-4.56864	-0.0840015	-0.0143269	0.153633	0.12008	0.0208819	-0.135633	-0.017806	0.0627433	-0.0790374	-0.0197062	-0.0307125	0.00144868	-0.0432682	-0.0194531	0.0104878	0.0126592	-0.00297935	0.0219949	-0.0421858	0.0175831	0.0135543	0.0447849
-4.56816	-0.0840016	-0.0142983	0.153642	0.120066	0.0209237	-0.135689	-0.017789	0.0627501	-0.0790156	-0.0196722	-0.0306723	0.00145427	-0.0432587	-0.0194431	0.0105078	0.0126537	-0.00298173	0.0220014	-0.0421698	0.0175838	0.0135533	0.044785
-4.56768	-0.0840015	-0.0142697	0.153652	0.120052	0.0209655	-0.135745	-0.017772	0.0627569	-0.0789937	-0.0196381	-0.0306323	0.00145987	-0.0432492	-0.0194332	0.0105278	0.0126482	-0.00298408	0.022008	-0.0421538	0.0175844	0.0135523	0.0447851
-4.5672	-0.0840013	-0.014241	0.153661	0.120037	0.0210073	-0.135801	-0.017755	0.0627638	-0.0789719	-0.0196041	-0.0305922	0.00146552	-0.0432397	-0.0194232	0.0105479	0.0126428	-0.00298642	0.0220146	-0.0421378	0.0175851	0.0135513	0.0447852
-4.56672	-0.084001	-0.0142123	0.15367	0.120023	0.0210492	-0.135857	-0.0177379	0.0627706	-0.07895	-0.0195701	-0.0305521	0.00147117	-0.0432302	-0.0194131	0.0105679	0.0126373	-0.00298873	0.0220211	-0.0421218	0.0175858	0.0135502	0.0447852
-4.56624	-0.0840006	-0.0141836	0.15368	0.120008	0.0210911	-0.135913	-0.0177208	0.0627775	-0.0789282	-0.0195361	-0.0305122	0.00147686	-0.0432208	-0.0194031	0.0105879	0.0126319	-0.00299102	0.0220277	-0.0421058	0.0175864	0.0135492	0.0447853
-4.56576	-0.0840001	-0.0141548	0.153689	0.119994	0.0211329	-0.135969	-0.0177037	0.0627844	-0.0789063	-0.0195021	-0.0304721	0.00148255	-0.0432113	-0.0193931	0.010608	0.0126264	-0.00299329	0.0220343	-0.0420898	0.017587	0.0135482	0.0447854
-4.56528	-0.0839994	-0.014126	0.153698	0.119979	0.0211748	-0.136025	-0.0176866	0.0627912	-0.0788844	-0.0194682	-0.0304322	0.00148828	-0.0432018	-0.0193831	0.0106281	0.012621	-0.00299554	0.0220409	-0.0420738	0.0175876	0.0135471	0.0447854
-4.5648	-0.0839988	-0.0140971	0.153707	0.119964	0.0212167	-0.136081	-0.0176694	0.0627981	-0.0788626	-0.0194342	-0.0303922	0.00149402	-0.0431924	-0.0193731	0.0106482	0.0126156	-0.00299777	0.0220474	-0.0420577	0.0175882	0.013546	0.0447855
-4.56432	-0.0839979	-0.0140682	0.153716	0.11995	0.0212586	-0.136137	-0.0176522	0.062805	-0.0788407	-0.0194003	-0.0303524	0.00149978	-0.043183	-0.0193631	0.0106683	0.0126101	-0.00299998	0.022054	-0.0420417	0.0175888	0.0135449	0.0447855
-4.56384	-0.0839971	-0.0140393	0.153725	0.119935	0.0213005	-0.136193	-0.017635	0.0628119	-0.0788188	-0.0193663	-0.0303125	0.00150557	-0.0431735	-0.0193531	0.0106884	0.0126047	-0.00300217	0.0220606	-0.0420257	0.0175894	0.0135438	0.0447855
-4.56336	-0.0839961	-0.0140103	0.153734	0.11992	0.0213424	-0.136249	-0.0176177	0.0628188	-0.0787969	-0.0193324	-0.0302726	0.00151137	-0.0431641	-0.0193431	0.0107085	0.0125993	-0.00300433	0.0220672	-0.0420097	0.01759	0.0135427	0.0447855
-4.56288	-0.0839951	-0.0139813	0.153743	0.119905	0.0213844	-0.136305	-0.0176005	0.0628258	-0.078775	-0.0192984	-0.0302328	0.0015172	-0.0431547	-0.019333	0.0107286	0.0125939	-0.00300647	0.0220738	-0.0419937	0.0175905	0.0135415	0.0447855
-4.5624	-0.083994	-0.0139522	0.153752	0.11989	0.0214263	-0.136361	-0.0175832	0.0628327	-0.0787531	-0.0192645	-0.030193	0.00152305	-0.0431453	-0.019323	0.0107488	0.0125885	-0.0030086	0.0220804	-0.0419777	0.0175911	0.0135404	0.0447855
-4.56192	-0.0839929	-0.0139231	0.153761	0.119875	0.0214683	-0.136417	-0.0175658	0.0628397	-0.0787312	-0.0192305	-0.0301533	0.00152891	-0.0431359	-0.019313	0.010769	0.012583	-0.0030107	0.022087	-0.0419617	0.0175916	0.0135392	0.0447855
-4.56144	-0.0839917	-0.0138939	0.15377	0.11986	0.0215102	-0.136474	-0.0175485	0.0628466	-0.0787093	-0.0191967	-0.0301135	0.00153483	-0.0431265	-0.0193029	0.0107891	0.0125776	-0.00301278	0.0220936	-0.0419458	0.0175922	0.0135381	0.0447854
-4.56096	-0.0839904	-0.0138647	0.153779	0.119845	0.0215522	-0.13653	-0.0175311	0.0628536	-0.0786875	-0.0191627	-0.0300738	0.00154075	-0.0431171	-0.0192929	0.0108093	0.0125722	-0.00301485	0.0221002	-0.0419298	0.0175927	0.0135369	0.0447854
-4.56048	-0.083989	-0.0138355	0.153787	0.11983	0.0215941	-0.136586	-0.0175136	0.0628606	-0.0786656	-0.0191288	-0.0300341	0.00154671	-0.0431077	-0.0192828	0.0108295	0.0125668	-0.00301689	0.0221068	-0.0419138	0.0175932	0.0135357	0.0447853
-4.56	-0.0839876	-0.0138062	0.153796	0.119815	0.0216361	-0.136642	-0.0174962	0.0628676	-0.0786437	-0.0190949	-0.0299944	0.0015527	-0.0430983	-0.0192728	0.0108497	0.0125614	-0.00301891	0.0221134	-0.0418979	0.0175937	0.0135345	0.0447853
-4.55952	-0.0839861	-0.0137769	0.153805	0.1198	0.0216781	-0.136698	-0.0174787	0.0628746	-0.0786218	-0.0190611	-0.0299547	0.00155869	-0.0430889	-0.0192628	0.01087	0.012556	-0.00302092	0.02212	-0.0418819	0.0175942	0.0135332	0.0447852
-4.55904	-0.0839846	-0.0137475	0.153814	0.119785	0.0217201	-0.136754	-0.0174612	0.0628816	-0.0786	-0.0190272	-0.0299151	0.00156473	-0.0430795	-0.0192528	0.0108902	0.0125506	-0.00302289	0.0221266	-0.0418659	0.0175947	0.013532	0.0447851
-4.55856	-0.0839829	-0.0137181	0.153822	0.119769	0.0217621	-0.13681	-0.0174437	0.0628886	-0.0785781	-0.0189933	-0.0298755	0.00157079	-0.0430701	-0.0192428	0.0109105	0.0125452	-0.00302485	0.0221332	-0.04185	0.0175951	0.0135307	0.044785
-4.55808	-0.0839812	-0.0136887	0.153831	0.119754	0.0218041	-0.136866	-0.0174262	0.0628957	-0.0785562	-0.0189594	-0.0298359	0.00157688	-0.0430608	-0.0192328	0.0109308	0.0125398	-0.00302678	0.0221399	-0.041834	0.0175956	0.0135295	0.0447849
-4.5576	-0.0839795	-0.0136592	0.153839	0.119739	0.0218462	-0.136922	-0.0174086	0.0629027	-0.0785344	-0.0189256	-0.0297964	0.00158301	-0.0430514	-0.0192228	0.0109511	0.0125344	-0.0030287	0.0221465	-0.0418181	0.017596	0.0135282	0.0447848
-4.55712	-0.0839776	-0.0136296	0.153848	0.119723	0.0218882	-0.136978	-0.017391	0.0629098	-0.0785125	-0.0188917	-0.0297568	0.00158916	-0.043042	-0.0192128	0.0109714	0.012529	-0.00303058	0.0221531	-0.0418022	0.0175965	0.0135269	0.0447847
-4.55664	-0.0839757	-0.0136001	0.153856	0.119708	0.0219302	-0.137034	-0.0173734	0.0629169	-0.0784906	-0.0188579	-0.0297173	0.00159534	-0.0430327	-0.0192028	0.0109917	0.0125236	-0.00303245	0.0221597	-0.0417862	0.0175969	0.0135256	0.0447845
-4.55616	-0.0839738	-0.0135704	0.153865	0.119692	0.0219722	-0.13709	-0.0173558	0.0629239	-0.0784688	-0.0188241	-0.0296778	0.00160154	-0.0430233	-0.0191928	0.0110121	0.0125181	-0.00303429	0.0221663	-0.0417703	0.0175973	0.0135242	0.0447844
-4.55568	-0.0839717	-0.0135407	0.153873	0.119676	0.0220143	-0.137146	-0.0173381	0.062931	-0.0784469	-0.0187902	-0.0296383	0.00160776	-0.043014	-0.0191829	0.0110325	0.0125127	-0.0030361	0.0221729	-0.0417543	0.0175977	0.0135229	0.0447842
-4.5552	-0.0839696	-0.013511	0.153881	0.119661	0.0220564	-0.137202	-0.0173204	0.0629381	-0.078425	-0.0187564	-0.0295989	0.00161399	-0.0430047	-0.0191729	0.0110529	0.0125073	-0.0030379	0.0221796	-0.0417384	0.0175981	0.0135215	0.0447841
-4.55472	-0.0839675	-0.0134812	0.15389	0.119645	0.0220984	-0.137259	-0.0173027	0.0629452	-0.0784031	-0.0187226	-0.0295595	0.00162024	-0.0429953	-0.019163	0.0110733	0.0125019	-0.00303967	0.0221862	-0.0417224	0.0175985	0.0135202	0.0447839
-4.55424	-0.0839652	-0.0134514	0.153898	0.119629	0.0221405	-0.137315	-0.017285	0.0629523	-0.0783812	-0.0186888	-0.02952	0.00162651	-0.042986	-0.019153	0.0110937	0.0124965	-0.00304141	0.0221928	-0.0417065	0.0175989	0.0135188	0.0447837
-4.55376	-0.0839629	-0.0134215	0.153906	0.119614	0.0221826	-0.137371	-0.0172672	0.0629595	-0.0783594	-0.018655	-0.0294807	0.00163281	-0.0429767	-0.019143	0.0111142	0.0124911	-0.00304315	0.0221994	-0.0416906	0.0175993	0.0135174	0.0447835
-4.55328	-0.0839606	-0.0133916	0.153915	0.119598	0.0222247	-0.137427	-0.0172494	0.0629666	-0.0783375	-0.0186212	-0.0294413	0.00163913	-0.0429674	-0.0191331	0.0111346	0.0124857	-0.00304484	0.022206	-0.0416746	0.0175997	0.013516	0.0447833
-4.5528	-0.0839581	-0.0133616	0.153923	0.119582	0.0222667	-0.137483	-0.0172316	0.0629737	-0.0783156	-0.0185874	-0.029402	0.0016455	-0.0429581	-0.0191231	0.0111551	0.0124803	-0.00304652	0.0222127	-0.0416587	0.0176	0.0135146	0.0447831
-4.55232	-0.0839556	-0.0133315	0.153931	0.119566	0.0223088	-0.13754	-0.0172137	0.0629809	-0.0782936	-0.0185536	-0.0293626	0.00165188	-0.0429488	-0.0191132	0.0111756	0.0124749	-0.00304818	0.0222193	-0.0416428	0.0176004	0.0135132	0.0447828
-4.55184	-0.0839531	-0.0133015	0.153939	0.11955	0.0223509	-0.137596	-0.0171959	0.0629881	-0.0782717	-0.0185198	-0.0293233	0.00165828	-0.0429395	-0.0191032	0.0111961	0.0124695	-0.00304981	0.0222259	-0.0416268	0.0176008	0.0135117	0.0447826
-4.55136	-0.0839504	-0.0132713	0.153947	0.119534	0.0223931	-0.137652	-0.017178	0.0629953	-0.0782498	-0.018486	-0.0292841	0.00166471	-0.0429302	-0.0190933	0.0112166	0.0124641	-0.00305142	0.0222326	-0.0416109	0.0176011	0.0135103	0.0447824
-4.55088	-0.0839477	-0.0132411	0.153955	0.119518	0.0224352	-0.137708	-0.01716	0.0630025	-0.0782278	-0.0184523	-0.0292449	0.00167118	-0.042921	-0.0190834	0.0112372	0.0124587	-0.003053	0.0222392	-0.041595	0.0176015	0.0135088	0.0447821
-4.5504	-0.083945	-0.0132109	0.153963	0.119501	0.0224773	-0.137765	-0.0171421	0.0630097	-0.0782059	-0.0184185	-0.0292056	0.00167766	-0.0429117	-0.0190735	0.0112577	0.0124533	-0.00305457	0.0222459	-0.0415791	0.0176018	0.0135073	0.0447818
-4.54992	-0.0839421	-0.0131806	0.153971	0.119485	0.0225194	-0.137821	-0.0171241	0.0630169	-0.0781839	-0.0183847	-0.0291664	0.00168418	-0.0429024	-0.0190636	0.0112783	0.012448	-0.00305611	0.0222526	-0.0415631	0.0176022	0.0135058	0.0447816
-4.54944	-0.0839393	-0.0131503	0.153979	0.119469	0.0225616	-0.137877	-0.0171062	0.0630241	-0.078162	-0.018351	-0.0291273	0.0016907	-0.0428932	-0.0190537	0.0112989	0.0124426	-0.00305763	0.0222592	-0.0415472	0.0176026	0.0135043	0.0447813
-4.54896	-0.0839363	-0.0131199	0.153987	0.119452	0.0226037	-0.137933	-0.0170882	0.0630313	-0.07814	-0.0183172	-0.0290882	0.00169723	-0.0428839	-0.0190438	0.0113194	0.0124372	-0.00305913	0.0222659	-0.0415313	0.0176029	0.0135027	0.044781
-4.54848	-0.0839332	-0.0130895	0.153994	0.119436	0.0226459	-0.13799	-0.0170702	0.0630386	-0.078118	-0.0182834	-0.0290491	0.00170377	-0.0428747	-0.0190339	0.0113401	0.0124318	-0.0030606	0.0222726	-0.0415154	0.0176033	0.0135012	0.0447807
-4.548	-0.0839301	-0.0130591	0.154002	0.119419	0.022688	-0.138046	-0.0170521	0.0630458	-0.078096	-0.0182497	-0.02901	0.00171035	-0.0428655	-0.019024	0.0113607	0.0124264	-0.00306206	0.0222793	-0.0414994	0.0176036	0.0134996	0.0447804
-4.54752	-0.0839269	-0.0130286	0.15401	0.119403	0.0227302	-0.138102	-0.0170341	0.0630531	-0.078074	-0.0182159	-0.0289709	0.00171694	-0.0428563	-0.0190141	0.0113813	0.0124209	-0.00306349	0.0222859	-0.0414835	0.017604	0.0134981	0.0447801
-4.54704	-0.0839237	-0.012998	0.154018	0.119386	0.0227723	-0.138159	-0.017016	0.0630604	-0.078052	-0.0181821	-0.0289319	0.00172357	-0.042847	-0.0190042	0.011402	0.0124155	-0.00306491	0.0222926	-0.0414676	0.0176044	0.0134965	0.0447798
-4.54656	-0.0839204	-0.0129674	0.154025	0.119369	0.0228145	-0.138215	-0.0169979	0.0630677	-0.0780299	-0.0181484	-0.0288929	0.00173021	-0.0428378	-0.0189943	0.0114227	0.0124101	-0.0030663	0.0222993	-0.0414516	0.0176047	0.0134949	0.0447794
-4.54608	-0.083917	-0.0129368	0.154033	0.119353	0.0228567	-0.138271	-0.0169798	0.063075	-0.0780079	-0.0181146	-0.028854	0.00173687	-0.0428286	-0.0189844	0.0114433	0.0124046	-0.00306767	0.022306	-0.0414357	0.0176051	0.0134932	0.0447791
-4.5456	-0.0839136	-0.0129061	0.15404	0.119336	0.0228989	-0.138328	-0.0169617	0.0630823	-0.0779859	-0.0180809	-0.028815	0.00174356	-0.0428194	-0.0189745	0.011464	0.0123992	-0.00306902	0.0223127	-0.0414198	0.0176054	0.0134916	0.0447788
-4.54512	-0.0839102	-0.0128754	0.154048	0.119319	0.0229411	-0.138384	-0.0169436	0.0630896	-0.0779639	-0.0180471	-0.0287761	0.00175027	-0.0428102	-0.0189645	0.0114848	0.0123938	-0.00307035	0.0223194	-0.0414039	0.0176058	0.01349	0.0447784
-4.54464	-0.0839067	-0.0128446	0.154055	0.119302	0.0229833	-0.13844	-0.0169254	0.0630969	-0.0779418	-0.0180134	-0.0287372	0.00175701	-0.0428011	-0.0189546	0.0115055	0.0123883	-0.00307166	0.0223261	-0.041388	0.0176062	0.0134883	0.0447781
-4.54416	-0.0839033	-0.0128138	0.154063	0.119285	0.0230255	-0.138496	-0.0169072	0.0631042	-0.0779198	-0.0179796	-0.0286983	0.00176379	-0.0427919	-0.0189447	0.0115262	0.0123829	-0.00307294	0.0223328	-0.0413721	0.0176065	0.0134866	0.0447777
-4.54368	-0.0838998	-0.012783	0.15407	0.119268	0.0230677	-0.138553	-0.016889	0.0631116	-0.0778977	-0.0179458	-0.0286594	0.00177056	-0.0427827	-0.0189348	0.011547	0.0123775	-0.0030742	0.0223395	-0.0413562	0.0176069	0.0134849	0.0447773
-4.5432	-0.0838963	-0.0127521	0.154078	0.119251	0.0231099	-0.138609	-0.0168708	0.0631189	-0.0778757	-0.0179121	-0.0286206	0.00177737	-0.0427735	-0.0189249	0.0115678	0.012372	-0.00307545	0.0223462	-0.0413403	0.0176072	0.0134832	0.0447769
-4.54272	-0.0838928	-0.0127212	0.154085	0.119233	0.0231521	-0.138665	-0.0168526	0.0631263	-0.0778536	-0.0178783	-0.0285818	0.00178421	-0.0427644	-0.018915	0.0115886	0.0123666	-0.00307666	0.022353	-0.0413244	0.0176076	0.0134815	0.0447765
-4.54224	-0.0838893	-0.0126902	0.154092	0.119216	0.0231944	-0.138722	-0.0168343	0.0631337	-0.0778316	-0.0178446	-0.028543	0.00179107	-0.0427553	-0.0189051	0.0116094	0.0123611	-0.00307786	0.0223597	-0.0413085	0.0176079	0.0134797	0.0447761
-4.54176	-0.0838857	-0.0126593	0.154099	0.119199	0.0232366	-0.138778	-0.016816	0.063141	-0.0778095	-0.0178108	-0.0285042	0.00179794	-0.0427461	-0.0188952	0.0116302	0.0123557	-0.00307904	0.0223664	-0.0412926	0.0176083	0.013478	0.0447757
-4.54128	-0.083882	-0.0126282	0.154106	0.119181	0.0232788	-0.138834	-0.0167978	0.0631484	-0.0777875	-0.017777	-0.0284655	0.00180485	-0.042737	-0.0188853	0.0116511	0.0123502	-0.00308018	0.0223731	-0.0412767	0.0176086	0.0134762	0.0447753
-4.5408	-0.0838784	-0.0125972	0.154114	0.119164	0.0233211	-0.13889	-0.0167794	0.0631558	-0.0777654	-0.0177433	-0.0284268	0.00181176	-0.0427278	-0.0188754	0.0116719	0.0123447	-0.00308132	0.0223798	-0.0412608	0.017609	0.0134744	0.0447748
-4.54032	-0.0838747	-0.0125661	0.154121	0.119146	0.0233633	-0.138947	-0.0167611	0.0631632	-0.0777434	-0.0177095	-0.0283881	0.00181869	-0.0427187	-0.0188655	0.0116928	0.0123393	-0.00308243	0.0223865	-0.0412449	0.0176094	0.0134726	0.0447744
-4.53984	-0.083871	-0.012535	0.154128	0.119129	0.0234056	-0.139003	-0.0167428	0.0631706	-0.0777213	-0.0176757	-0.0283495	0.00182564	-0.0427096	-0.0188556	0.0117137	0.0123338	-0.00308352	0.0223933	-0.041229	0.0176097	0.0134708	0.0447739
-4.53936	-0.0838672	-0.0125039	0.154135	0.119111	0.0234479	-0.139059	-0.0167244	0.063178	-0.0776992	-0.017642	-0.0283109	0.00183263	-0.0427005	-0.0188457	0.0117346	0.0123284	-0.00308458	0.0224	-0.0412131	0.0176101	0.013469	0.0447735
-4.53888	-0.0838634	-0.0124727	0.154142	0.119094	0.0234901	-0.139115	-0.0167061	0.0631855	-0.0776772	-0.0176082	-0.0282722	0.00183962	-0.0426914	-0.0188358	0.0117556	0.0123229	-0.00308563	0.0224067	-0.0411972	0.0176104	0.0134672	0.044773
-4.5384	-0.0838595	-0.0124415	0.154149	0.119076	0.0235324	-0.139172	-0.0166877	0.0631929	-0.0776551	-0.0175745	-0.0282336	0.00184665	-0.0426822	-0.0188259	0.0117765	0.0123175	-0.00308665	0.0224135	-0.0411813	0.0176108	0.0134653	0.0447726
-4.53792	-0.0838556	-0.0124102	0.154155	0.119058	0.0235747	-0.139228	-0.0166693	0.0632004	-0.0776331	-0.0175407	-0.0281951	0.00185366	-0.0426731	-0.0188159	0.0117975	0.012312	-0.00308764	0.0224202	-0.0411654	0.0176112	0.0134635	0.0447721
-4.53744	-0.0838516	-0.012379	0.154162	0.11904	0.023617	-0.139284	-0.0166509	0.0632078	-0.077611	-0.0175069	-0.0281566	0.00186072	-0.042664	-0.018806	0.0118185	0.0123065	-0.00308862	0.0224269	-0.0411495	0.0176116	0.0134616	0.0447716
-4.53696	-0.0838476	-0.0123477	0.154169	0.119022	0.0236593	-0.139341	-0.0166324	0.0632153	-0.0775889	-0.0174732	-0.0281181	0.00186776	-0.0426549	-0.0187961	0.0118394	0.0123011	-0.00308958	0.0224337	-0.0411337	0.0176119	0.0134597	0.0447711
-4.53648	-0.0838435	-0.0123164	0.154176	0.119005	0.0237015	-0.139397	-0.016614	0.0632228	-0.0775668	-0.0174394	-0.0280797	0.00187484	-0.0426458	-0.0187861	0.0118605	0.0122956	-0.00309052	0.0224404	-0.0411178	0.0176123	0.0134578	0.0447706
-4.536	-0.0838394	-0.012285	0.154182	0.118987	0.0237438	-0.139453	-0.0165956	0.0632302	-0.0775448	-0.0174056	-0.0280413	0.00188193	-0.0426367	-0.0187762	0.0118815	0.0122902	-0.00309144	0.0224472	-0.041102	0.0176127	0.0134559	0.0447701
-4.53552	-0.0838352	-0.0122537	0.154189	0.118969	0.0237861	-0.139509	-0.0165772	0.0632377	-0.0775227	-0.0173719	-0.028003	0.00188905	-0.0426276	-0.0187662	0.0119025	0.0122847	-0.00309233	0.0224539	-0.0410861	0.0176131	0.0134539	0.0447696
-4.53504	-0.083831	-0.0122223	0.154196	0.118951	0.0238284	-0.139566	-0.0165587	0.0632452	-0.0775006	-0.0173381	-0.0279646	0.00189619	-0.0426186	-0.0187563	0.0119235	0.0122792	-0.0030932	0.0224607	-0.0410703	0.0176135	0.013452	0.0447691
-4.53456	-0.0838267	-0.0121908	0.154202	0.118932	0.0238707	-0.139622	-0.0165403	0.0632527	-0.0774785	-0.0173044	-0.0279263	0.00190335	-0.0426095	-0.0187464	0.0119446	0.0122737	-0.00309405	0.0224674	-0.0410545	0.0176138	0.01345	0.0447686
-4.53408	-0.0838223	-0.0121594	0.154209	0.118914	0.023913	-0.139678	-0.0165219	0.0632603	-0.0774564	-0.0172706	-0.027888	0.00191052	-0.0426004	-0.0187364	0.0119657	0.0122682	-0.00309487	0.0224742	-0.0410386	0.0176142	0.013448	0.0447681
-4.5336	-0.0838179	-0.0121279	0.154215	0.118896	0.0239553	-0.139734	-0.0165034	0.0632678	-0.0774343	-0.0172369	-0.0278498	0.00191772	-0.0425913	-0.0187265	0.0119868	0.0122627	-0.00309568	0.022481	-0.0410228	0.0176146	0.0134461	0.0447675
-4.53312	-0.0838134	-0.0120964	0.154222	0.118878	0.0239977	-0.139791	-0.016485	0.0632753	-0.0774122	-0.0172031	-0.0278116	0.00192493	-0.0425823	-0.0187165	0.0120079	0.0122573	-0.00309647	0.0224877	-0.041007	0.017615	0.0134441	0.044767
-4.53264	-0.0838089	-0.0120649	0.154228	0.11886	0.02404	-0.139847	-0.0164665	0.0632829	-0.0773901	-0.0171694	-0.0277734	0.00193217	-0.0425732	-0.0187065	0.012029	0.0122518	-0.00309722	0.0224945	-0.0409912	0.0176154	0.013442	0.0447664
-4.53216	-0.0838044	-0.0120333	0.154234	0.118841	0.0240823	-0.139903	-0.0164481	0.0632904	-0.077368	-0.0171356	-0.0277353	0.00193941	-0.0425641	-0.0186965	0.0120502	0.0122463	-0.00309797	0.0225012	-0.0409754	0.0176158	0.01344	0.0447658
-4.53168	-0.0837998	-0.0120018	0.154241	0.118823	0.0241246	-0.139959	-0.0164296	0.063298	-0.0773459	-0.0171019	-0.0276972	0.00194667	-0.0425551	-0.0186865	0.0120713	0.0122408	-0.00309869	0.022508	-0.0409595	0.0176162	0.013438	0.0447653
-4.5312	-0.0837952	-0.0119702	0.154247	0.118804	0.024167	-0.140016	-0.0164111	0.0633056	-0.0773237	-0.0170681	-0.0276591	0.00195396	-0.042546	-0.0186765	0.0120925	0.0122353	-0.00309938	0.0225148	-0.0409437	0.0176166	0.0134359	0.0447647
-4.53072	-0.0837906	-0.0119386	0.154253	0.118786	0.0242093	-0.140072	-0.0163927	0.0633131	-0.0773016	-0.0170344	-0.0276211	0.00196126	-0.0425369	-0.0186665	0.0121137	0.0122298	-0.00310006	0.0225215	-0.0409279	0.0176171	0.0134339	0.0447641
-4.53024	-0.0837859	-0.0119069	0.154259	0.118767	0.0242516	-0.140128	-0.0163742	0.0633207	-0.0772795	-0.0170006	-0.027583	0.00196858	-0.0425279	-0.0186565	0.0121349	0.0122243	-0.00310072	0.0225283	-0.0409121	0.0176175	0.0134318	0.0447635
-4.52976	-0.0837812	-0.0118752	0.154266	0.118749	0.0242939	-0.140184	-0.0163557	0.0633283	-0.0772573	-0.0169669	-0.0275451	0.00197593	-0.0425188	-0.0186465	0.0121561	0.0122189	-0.00310135	0.0225351	-0.0408962	0.0176179	0.0134297	0.044763
-4.52928	-0.0837764	-0.0118435	0.154272	0.11873	0.0243363	-0.140241	-0.0163372	0.0633359	-0.0772352	-0.0169331	-0.0275071	0.00198325	-0.0425097	-0.0186365	0.0121773	0.0122134	-0.00310196	0.0225419	-0.0408804	0.0176184	0.0134276	0.0447624
-4.5288	-0.0837716	-0.0118118	0.154278	0.118711	0.0243786	-0.140297	-0.0163188	0.0633435	-0.077213	-0.0168994	-0.0274692	0.00199066	-0.0425007	-0.0186265	0.0121986	0.0122079	-0.00310256	0.0225486	-0.0408646	0.0176188	0.0134255	0.0447617
-4.52832	-0.0837667	-0.0117801	0.154284	0.118693	0.024421	-0.140353	-0.0163003	0.0633511	-0.0771909	-0.0168656	-0.0274313	0.00199801	-0.0424916	-0.0186165	0.0122198	0.0122024	-0.00310313	0.0225554	-0.0408488	0.0176193	0.0134233	0.0447611
-4.52784	-0.0837617	-0.0117483	0.15429	0.118674	0.0244633	-0.140409	-0.0162818	0.0633588	-0.0771687	-0.0168319	-0.0273935	0.00200539	-0.0424826	-0.0186065	0.0122411	0.012197	-0.00310367	0.0225622	-0.040833	0.0176197	0.0134212	0.0447605
-4.52736	-0.0837568	-0.0117165	0.154296	0.118655	0.0245057	-0.140465	-0.0162633	0.0633664	-0.0771466	-0.0167982	-0.0273557	0.00201278	-0.0424735	-0.0185965	0.0122624	0.0121915	-0.0031042	0.022569	-0.0408172	0.0176202	0.013419	0.0447598
-4.52688	-0.0837517	-0.0116847	0.154302	0.118636	0.0245481	-0.140522	-0.0162447	0.0633741	-0.0771244	-0.0167644	-0.0273179	0.00202019	-0.0424644	-0.0185865	0.0122837	0.012186	-0.00310471	0.0225757	-0.0408014	0.0176207	0.0134168	0.0447592
-4.5264	-0.0837466	-0.0116529	0.154307	0.118617	0.0245904	-0.140578	-0.0162262	0.0633817	-0.0771022	-0.0167307	-0.0272801	0.00202759	-0.0424554	-0.0185765	0.012305	0.0121805	-0.00310519	0.0225825	-0.0407857	0.0176211	0.0134147	0.0447585
-4.52592	-0.0837414	-0.011621	0.154313	0.118598	0.0246328	-0.140634	-0.0162077	0.0633894	-0.07708	-0.016697	-0.0272425	0.00203501	-0.0424463	-0.0185666	0.0123264	0.0121751	-0.00310565	0.0225893	-0.0407699	0.0176216	0.0134125	0.0447579
-4.52544	-0.0837362	-0.0115891	0.154319	0.118579	0.0246752	-0.14069	-0.0161891	0.0633971	-0.0770578	-0.0166632	-0.0272048	0.00204243	-0.0424372	-0.0185565	0.0123478	0.0121696	-0.00310611	0.0225961	-0.0407541	0.0176221	0.0134102	0.0447572
-4.52496	-0.0837308	-0.0115572	0.154325	0.11856	0.0247175	-0.140746	-0.0161706	0.0634047	-0.0770356	-0.0166295	-0.0271671	0.00204985	-0.0424282	-0.0185465	0.0123692	0.0121641	-0.00310653	0.0226029	-0.0407383	0.0176226	0.013408	0.0447565
-4.52448	-0.0837255	-0.0115253	0.15433	0.118541	0.0247599	-0.140802	-0.016152	0.0634125	-0.0770134	-0.0165958	-0.0271295	0.00205728	-0.0424191	-0.0185365	0.0123906	0.0121587	-0.00310693	0.0226097	-0.0407226	0.0176231	0.0134058	0.0447558
-4.524	-0.0837201	-0.0114933	0.154336	0.118522	0.0248023	-0.140858	-0.0161335	0.0634202	-0.0769912	-0.016562	-0.027092	0.00206472	-0.0424101	-0.0185264	0.012412	0.0121532	-0.00310732	0.0226165	-0.0407068	0.0176236	0.0134035	0.044755
-4.52352	-0.0837146	-0.0114613	0.154342	0.118503	0.0248447	-0.140915	-0.0161149	0.0634279	-0.076969	-0.0165283	-0.0270545	0.00207218	-0.042401	-0.0185164	0.0124335	0.0121477	-0.00310768	0.0226233	-0.0406911	0.0176242	0.0134013	0.0447543
-4.52304	-0.0837091	-0.0114293	0.154347	0.118483	0.024887	-0.140971	-0.0160963	0.0634356	-0.0769467	-0.0164946	-0.027017	0.00207964	-0.042392	-0.0185063	0.012455	0.0121423	-0.00310802	0.0226301	-0.0406753	0.0176247	0.013399	0.0447536
-4.52256	-0.0837035	-0.0113972	0.154353	0.118464	0.0249294	-0.141027	-0.0160777	0.0634433	-0.0769245	-0.0164608	-0.0269795	0.00208713	-0.0423829	-0.0184962	0.0124765	0.0121368	-0.00310834	0.0226369	-0.0406596	0.0176252	0.0133967	0.0447528
-4.52208	-0.0836978	-0.0113651	0.154358	0.118445	0.0249718	-0.141083	-0.0160591	0.0634511	-0.0769022	-0.0164271	-0.0269421	0.00209461	-0.0423739	-0.0184861	0.012498	0.0121313	-0.00310864	0.0226438	-0.0406438	0.0176258	0.0133943	0.0447521
-4.5216	-0.0836921	-0.011333	0.154364	0.118425	0.0250142	-0.141139	-0.0160404	0.0634588	-0.07688	-0.0163933	-0.0269047	0.0021021	-0.0423648	-0.0184761	0.0125196	0.0121259	-0.00310893	0.0226506	-0.0406281	0.0176263	0.013392	0.0447513
-4.52112	-0.0836863	-0.0113008	0.154369	0.118406	0.0250566	-0.141195	-0.0160218	0.0634666	-0.0768577	-0.0163596	-0.0268674	0.00210962	-0.0423558	-0.018466	0.0125411	0.0121204	-0.00310919	0.0226574	-0.0406123	0.0176269	0.0133897	0.0447505
-4.52064	-0.0836805	-0.0112686	0.154375	0.118387	0.0250991	-0.141251	-0.0160032	0.0634744	-0.0768354	-0.0163258	-0.0268301	0.00211713	-0.0423467	-0.0184559	0.0125627	0.012115	-0.00310944	0.0226642	-0.0405966	0.0176275	0.0133874	0.0447497
-4.52016	-0.0836746	-0.0112364	0.15438	0.118367	0.0251415	-0.141307	-0.0159845	0.0634821	-0.0768131	-0.0162921	-0.0267928	0.00212465	-0.0423377	-0.0184458	0.0125844	0.0121095	-0.00310967	0.022671	-0.0405808	0.017628	0.013385	0.0447489
-4.51968	-0.0836686	-0.0112042	0.154385	0.118348	0.0251839	-0.141363	-0.0159659	0.0634899	-0.0767909	-0.0162583	-0.0267556	0.00213216	-0.0423286	-0.0184358	0.012606	0.012104	-0.00310988	0.0226779	-0.0405651	0.0176286	0.0133826	0.0447481
-4.5192	-0.0836626	-0.0111719	0.154391	0.118328	0.0252263	-0.141419	-0.0159472	0.0634977	-0.0767685	-0.0162246	-0.0267184	0.00213971	-0.0423195	-0.0184257	0.0126277	0.0120985	-0.00311008	0.0226847	-0.0405493	0.0176292	0.0133802	0.0447473
-4.51872	-0.0836566	-0.0111396	0.154396	0.118309	0.0252688	-0.141475	-0.0159285	0.0635055	-0.0767462	-0.0161908	-0.0266812	0.00214726	-0.0423105	-0.0184156	0.0126493	0.012093	-0.00311025	0.0226915	-0.0405335	0.0176298	0.0133778	0.0447464
-4.51824	-0.0836505	-0.0111073	0.154401	0.118289	0.0253112	-0.141531	-0.0159099	0.0635133	-0.0767239	-0.0161571	-0.0266441	0.00215481	-0.0423014	-0.0184055	0.0126711	0.0120875	-0.0031104	0.0226984	-0.0405178	0.0176304	0.0133754	0.0447456
-4.51776	-0.0836443	-0.0110749	0.154406	0.11827	0.0253537	-0.141587	-0.0158912	0.0635212	-0.0767016	-0.0161233	-0.0266069	0.00216237	-0.0422924	-0.0183955	0.0126928	0.012082	-0.00311053	0.0227052	-0.040502	0.017631	0.013373	0.0447447
-4.51728	-0.0836381	-0.0110425	0.154411	0.11825	0.0253961	-0.141643	-0.0158725	0.063529	-0.0766792	-0.0160896	-0.0265699	0.00216995	-0.0422833	-0.0183854	0.0127145	0.0120765	-0.00311064	0.0227121	-0.0404862	0.0176317	0.0133705	0.0447439
-4.5168	-0.0836319	-0.0110101	0.154416	0.118231	0.0254386	-0.141698	-0.0158539	0.0635368	-0.0766569	-0.0160558	-0.0265328	0.00217751	-0.0422743	-0.0183753	0.0127363	0.012071	-0.00311073	0.0227189	-0.0404704	0.0176323	0.0133681	0.044743
-4.51632	-0.0836258	-0.0109777	0.154421	0.118211	0.0254811	-0.141754	-0.0158352	0.0635447	-0.0766345	-0.016022	-0.0264958	0.0021851	-0.0422652	-0.0183652	0.0127581	0.0120655	-0.0031108	0.0227258	-0.0404546	0.017633	0.0133656	0.0447421
-4.51584	-0.0836198	-0.0109452	0.154426	0.118191	0.0255235	-0.14181	-0.0158165	0.0635525	-0.0766121	-0.0159882	-0.0264588	0.00219268	-0.0422562	-0.0183551	0.01278	0.01206	-0.00311085	0.0227327	-0.0404389	0.0176336	0.0133631	0.0447413
-4.51536	-0.0836137	-0.0109127	0.154431	0.118172	0.025566	-0.141866	-0.0157979	0.0635604	-0.0765897	-0.0159545	-0.0264219	0.0022003	-0.0422471	-0.0183449	0.0128018	0.0120545	-0.00311087	0.0227396	-0.0404231	0.0176343	0.0133606	0.0447404
-4.51488	-0.0836077	-0.0108801	0.154436	0.118152	0.0256085	-0.141922	-0.0157792	0.0635682	-0.0765673	-0.0159206	-0.026385	0.00220788	-0.0422381	-0.0183348	0.0128237	0.012049	-0.00311088	0.0227465	-0.0404073	0.017635	0.0133581	0.0447395
-4.5144	-0.0836016	-0.0108476	0.154441	0.118132	0.025651	-0.141977	-0.0157605	0.0635761	-0.0765449	-0.0158869	-0.0263481	0.00221552	-0.042229	-0.0183246	0.0128456	0.0120435	-0.00311087	0.0227534	-0.0403915	0.0176357	0.0133556	0.0447386
-4.51392	-0.0835955	-0.010815	0.154446	0.118113	0.0256935	-0.142033	-0.0157418	0.063584	-0.0765225	-0.0158531	-0.0263112	0.00222311	-0.04222	-0.0183144	0.0128676	0.012038	-0.00311084	0.0227603	-0.0403758	0.0176364	0.013353	0.0447376
-4.51344	-0.0835894	-0.0107823	0.154451	0.118093	0.025736	-0.142089	-0.0157232	0.0635919	-0.0765001	-0.0158193	-0.0262744	0.0022307	-0.042211	-0.0183043	0.0128895	0.0120325	-0.00311079	0.0227672	-0.04036	0.0176371	0.0133505	0.0447367
-4.51296	-0.0835833	-0.0107497	0.154456	0.118073	0.0257785	-0.142144	-0.0157045	0.0635998	-0.0764776	-0.0157855	-0.0262376	0.00223829	-0.0422019	-0.0182941	0.0129115	0.012027	-0.00311072	0.0227741	-0.0403443	0.0176378	0.0133479	0.0447358
-4.51248	-0.0835771	-0.010717	0.15446	0.118053	0.025821	-0.1422	-0.0156858	0.0636077	-0.0764552	-0.0157517	-0.0262008	0.00224587	-0.0421929	-0.0182839	0.0129335	0.0120215	-0.00311063	0.022781	-0.0403285	0.0176385	0.0133453	0.0447348
-4.512	-0.0835709	-0.0106842	0.154465	0.118033	0.0258635	-0.142255	-0.0156671	0.0636157	-0.0764327	-0.0157178	-0.0261641	0.00225344	-0.0421839	-0.0182737	0.0129555	0.012016	-0.00311052	0.022788	-0.0403128	0.0176393	0.0133427	0.0447339
-4.51152	-0.0835646	-0.0106515	0.15447	0.118013	0.025906	-0.142311	-0.0156484	0.0636236	-0.0764103	-0.015684	-0.0261274	0.00226102	-0.0421749	-0.0182635	0.0129776	0.0120105	-0.00311038	0.0227949	-0.0402971	0.0176401	0.0133401	0.0447329
-4.51104	-0.0835583	-0.0106187	0.154474	0.117993	0.0259485	-0.142366	-0.0156296	0.0636315	-0.0763878	-0.0156502	-0.0260907	0.00226857	-0.0421658	-0.0182532	0.0129996	0.012005	-0.00311023	0.0228019	-0.0402814	0.0176409	0.0133374	0.044732
-4.51056	-0.0835519	-0.0105858	0.154479	0.117973	0.025991	-0.142422	-0.0156109	0.0636395	-0.0763653	-0.0156164	-0.0260541	0.00227613	-0.0421568	-0.0182429	0.0130217	0.0119996	-0.00311005	0.0228088	-0.0402656	0.0176417	0.0133348	0.044731
-4.51008	-0.0835455	-0.010553	0.154484	0.117953	0.0260335	-0.142477	-0.0155922	0.0636475	-0.0763429	-0.0155825	-0.0260175	0.00228365	-0.0421478	-0.0182326	0.0130438	0.0119941	-0.00310986	0.0228158	-0.0402499	0.0176425	0.0133321	0.04473
-4.5096	-0.083539	-0.0105201	0.154488	0.117933	0.026076	-0.142532	-0.0155735	0.0636554	-0.0763204	-0.0155487	-0.0259809	0.00229118	-0.0421388	-0.0182223	0.013066	0.0119886	-0.00310966	0.0228228	-0.0402342	0.0176434	0.0133294	0.044729
-4.50912	-0.0835324	-0.0104872	0.154493	0.117913	0.0261185	-0.142588	-0.0155548	0.0636634	-0.0762979	-0.0155149	-0.0259444	0.00229869	-0.0421298	-0.018212	0.0130881	0.0119831	-0.00310942	0.0228298	-0.0402185	0.0176443	0.0133267	0.0447281
-4.50864	-0.0835258	-0.0104542	0.154497	0.117893	0.026161	-0.142643	-0.015536	0.0636714	-0.0762754	-0.015481	-0.0259079	0.0023062	-0.0421208	-0.0182016	0.0131103	0.0119776	-0.00310917	0.0228368	-0.0402028	0.0176452	0.013324	0.0447271
-4.50816	-0.0835192	-0.0104212	0.154501	0.117873	0.0262035	-0.142698	-0.0155173	0.0636794	-0.0762529	-0.0154472	-0.0258714	0.00231366	-0.0421119	-0.0181912	0.0131325	0.0119722	-0.0031089	0.0228437	-0.0401871	0.0176461	0.0133213	0.0447261
-4.50768	-0.0835124	-0.0103882	0.154506	0.117853	0.026246	-0.142754	-0.0154985	0.0636874	-0.0762304	-0.0154133	-0.025835	0.00232116	-0.0421029	-0.0181808	0.0131548	0.0119667	-0.00310861	0.0228508	-0.0401714	0.017647	0.0133185	0.044725
-4.5072	-0.0835057	-0.0103551	0.15451	0.117832	0.0262885	-0.142809	-0.0154798	0.0636955	-0.0762079	-0.0153795	-0.0257986	0.0023286	-0.0420939	-0.0181703	0.013177	0.0119612	-0.0031083	0.0228578	-0.0401557	0.0176479	0.0133158	0.044724
-4.50672	-0.0834989	-0.010322	0.154514	0.117812	0.0263311	-0.142864	-0.015461	0.0637035	-0.0761854	-0.0153456	-0.0257623	0.00233606	-0.0420849	-0.0181598	0.0131993	0.0119558	-0.00310797	0.0228648	-0.04014	0.0176489	0.013313	0.044723
-4.50624	-0.083492	-0.0102889	0.154519	0.117792	0.0263736	-0.14292	-0.0154422	0.0637115	-0.0761629	-0.0153118	-0.0257259	0.00234347	-0.0420759	-0.0181494	0.0132216	0.0119504	-0.00310761	0.0228718	-0.0401244	0.0176499	0.0133102	0.0447219
-4.50576	-0.0834851	-0.0102558	0.154523	0.117771	0.0264161	-0.142975	-0.0154235	0.0637196	-0.0761404	-0.0152779	-0.0256896	0.00235086	-0.042067	-0.0181389	0.0132439	0.0119449	-0.00310725	0.0228788	-0.0401087	0.0176509	0.0133074	0.0447209
-4.50528	-0.0834782	-0.0102226	0.154527	0.117751	0.0264586	-0.14303	-0.0154047	0.0637277	-0.0761179	-0.0152441	-0.0256534	0.00235822	-0.042058	-0.0181284	0.0132663	0.0119395	-0.00310686	0.0228858	-0.040093	0.0176519	0.0133046	0.0447198
-4.5048	-0.0834711	-0.0101894	0.154531	0.117731	0.0265012	-0.143085	-0.0153859	0.0637357	-0.0760955	-0.0152102	-0.0256172	0.00236558	-0.042049	-0.0181179	0.0132887	0.0119341	-0.00310645	0.0228929	-0.0400773	0.017653	0.0133017	0.0447187
-4.50432	-0.0834641	-0.0101561	0.154535	0.11771	0.0265437	-0.14314	-0.0153671	0.0637438	-0.076073	-0.0151763	-0.0255809	0.00237289	-0.04204	-0.0181073	0.0133111	0.0119287	-0.00310603	0.0228999	-0.0400617	0.017654	0.0132989	0.0447177
-4.50384	-0.083457	-0.0101228	0.154539	0.11769	0.0265862	-0.143196	-0.0153483	0.0637519	-0.0760505	-0.0151425	-0.0255448	0.00238023	-0.0420311	-0.0180968	0.0133335	0.0119232	-0.00310558	0.0229069	-0.040046	0.0176551	0.013296	0.0447165
-4.50336	-0.0834499	-0.0100895	0.154543	0.117669	0.0266288	-0.143251	-0.0153295	0.06376	-0.0760281	-0.0151086	-0.0255086	0.00238753	-0.0420221	-0.0180862	0.0133559	0.0119179	-0.00310511	0.022914	-0.0400304	0.0176562	0.0132931	0.0447154
-4.50288	-0.0834427	-0.0100562	0.154547	0.117649	0.0266713	-0.143306	-0.0153107	0.0637682	-0.0760056	-0.0150748	-0.0254725	0.00239484	-0.0420132	-0.0180757	0.0133784	0.0119125	-0.00310463	0.022921	-0.0400147	0.0176573	0.0132902	0.0447143
-4.5024	-0.0834355	-0.0100228	0.154551	0.117628	0.0267138	-0.143361	-0.0152919	0.0637763	-0.0759831	-0.0150409	-0.0254364	0.0024021	-0.0420042	-0.0180651	0.0134009	0.0119071	-0.00310413	0.0229281	-0.039999	0.0176585	0.0132873	0.0447132
-4.50192	-0.0834282	-0.0099894	0.154555	0.117607	0.0267564	-0.143416	-0.015273	0.0637844	-0.0759607	-0.015007	-0.0254004	0.00240938	-0.0419953	-0.0180545	0.0134234	0.0119017	-0.00310362	0.0229352	-0.0399834	0.0176596	0.0132843	0.044712
-4.50144	-0.0834209	-0.00995598	0.154559	0.117587	0.0267989	-0.143471	-0.0152542	0.0637926	-0.0759382	-0.0149731	-0.0253644	0.0024166	-0.0419863	-0.0180439	0.013446	0.0118963	-0.00310308	0.0229422	-0.0399677	0.0176608	0.0132814	0.0447109
-4.50096	-0.0834135	-0.00992252	0.154562	0.117566	0.0268415	-0.143526	-0.0152353	0.0638008	-0.0759158	-0.0149393	-0.0253284	0.00242383	-0.0419774	-0.0180334	0.0134686	0.011891	-0.00310252	0.0229493	-0.039952	0.017662	0.0132784	0.0447097
-4.50048	-0.0834061	-0.00988904	0.154566	0.117545	0.026884	-0.143581	-0.0152165	0.063809	-0.0758934	-0.0149054	-0.0252925	0.00243103	-0.0419684	-0.0180228	0.0134912	0.0118856	-0.00310195	0.0229564	-0.0399364	0.0176632	0.0132754	0.0447085
-4.5	-0.0833986	-0.00985552	0.15457	0.117525	0.0269266	-0.143636	-0.0151976	0.0638172	-0.0758709	-0.0148715	-0.0252566	0.0024382	-0.0419595	-0.0180122	0.0135138	0.0118803	-0.00310136	0.0229635	-0.0399208	0.0176644	0.0132724	0.0447073
-4.49952	-0.0833912	-0.00982199	0.154574	0.117504	0.0269691	-0.143692	-0.0151787	0.0638254	-0.0758485	-0.0148376	-0.0252207	0.00244533	-0.0419505	-0.0180016	0.0135364	0.0118749	-0.00310075	0.0229705	-0.0399051	0.0176656	0.0132693	0.0447061
-4.49904	-0.0833837	-0.00978841	0.154577	0.117483	0.0270117	-0.143747	-0.0151598	0.0638336	-0.075826	-0.0148038	-0.0251849	0.00245244	-0.0419416	-0.017991	0.0135591	0.0118696	-0.00310012	0.0229777	-0.0398895	0.0176669	0.0132663	0.0447049
-4.49856	-0.0833763	-0.00975481	0.154581	0.117462	0.0270542	-0.143802	-0.0151409	0.0638419	-0.0758036	-0.0147699	-0.0251491	0.00245954	-0.0419327	-0.0179804	0.0135818	0.0118643	-0.00309947	0.0229848	-0.0398738	0.0176681	0.0132632	0.0447037
-4.49808	-0.0833687	-0.00972117	0.154584	0.117441	0.0270968	-0.143857	-0.015122	0.0638501	-0.0757812	-0.014736	-0.0251133	0.00246663	-0.0419237	-0.0179698	0.0136045	0.0118589	-0.0030988	0.0229918	-0.0398582	0.0176694	0.0132602	0.0447024
-4.4976	-0.0833612	-0.00968749	0.154588	0.11742	0.0271393	-0.143912	-0.0151031	0.0638584	-0.0757587	-0.0147021	-0.0250776	0.00247366	-0.0419148	-0.0179591	0.0136272	0.0118536	-0.0030981	0.022999	-0.0398426	0.0176708	0.0132571	0.0447012
-4.49712	-0.0833536	-0.00965379	0.154591	0.117399	0.0271819	-0.143967	-0.0150842	0.0638666	-0.0757363	-0.0146683	-0.0250419	0.00248069	-0.0419058	-0.0179485	0.0136499	0.0118483	-0.00309739	0.0230061	-0.0398269	0.0176721	0.0132539	0.0446999
-4.49664	-0.0833461	-0.00962008	0.154595	0.117378	0.0272244	-0.144022	-0.0150653	0.0638749	-0.0757139	-0.0146344	-0.0250062	0.00248768	-0.0418969	-0.0179379	0.0136728	0.011843	-0.00309666	0.0230132	-0.0398113	0.0176734	0.0132508	0.0446986
-4.49616	-0.0833385	-0.00958632	0.154598	0.117356	0.027267	-0.144077	-0.0150464	0.0638832	-0.0756915	-0.0146005	-0.0249706	0.00249465	-0.041888	-0.0179272	0.0136955	0.0118377	-0.00309591	0.0230203	-0.0397957	0.0176748	0.0132477	0.0446973
-4.49568	-0.083331	-0.00955256	0.154601	0.117335	0.0273095	-0.144132	-0.0150275	0.0638915	-0.0756691	-0.0145666	-0.024935	0.00250159	-0.041879	-0.0179165	0.0137184	0.0118324	-0.00309514	0.0230274	-0.0397801	0.0176762	0.0132445	0.044696
-4.4952	-0.0833233	-0.00951877	0.154605	0.117314	0.0273521	-0.144187	-0.0150085	0.0638999	-0.0756466	-0.0145328	-0.0248995	0.0025085	-0.0418701	-0.0179058	0.0137412	0.0118271	-0.00309436	0.0230346	-0.0397645	0.0176776	0.0132413	0.0446946
-4.49472	-0.0833158	-0.00948496	0.154608	0.117293	0.0273947	-0.144242	-0.0149896	0.0639082	-0.0756242	-0.0144989	-0.024864	0.00251535	-0.0418612	-0.0178951	0.0137641	0.0118218	-0.00309356	0.0230417	-0.0397489	0.017679	0.0132381	0.0446933
-4.49424	-0.0833082	-0.00945111	0.154611	0.117271	0.0274372	-0.144297	-0.0149707	0.0639165	-0.0756017	-0.014465	-0.0248285	0.00252218	-0.0418523	-0.0178844	0.013787	0.0118165	-0.00309273	0.0230489	-0.0397333	0.0176805	0.0132349	0.0446919
-4.49376	-0.0833008	-0.00941726	0.154614	0.11725	0.0274798	-0.144353	-0.0149517	0.0639249	-0.0755793	-0.0144311	-0.024793	0.00252895	-0.0418433	-0.0178737	0.0138099	0.0118112	-0.0030919	0.023056	-0.0397177	0.0176819	0.0132317	0.0446905
-4.49328	-0.0832932	-0.00938337	0.154617	0.117229	0.0275224	-0.144408	-0.0149328	0.0639333	-0.0755569	-0.0143972	-0.0247576	0.00253573	-0.0418344	-0.0178629	0.0138329	0.0118059	-0.00309104	0.0230632	-0.0397021	0.0176834	0.0132284	0.0446891
-4.4928	-0.0832857	-0.00934946	0.15462	0.117207	0.0275649	-0.144463	-0.0149138	0.0639417	-0.0755344	-0.0143633	-0.0247222	0.00254243	-0.0418255	-0.0178522	0.0138558	0.0118006	-0.00309016	0.0230704	-0.0396865	0.0176849	0.0132252	0.0446877
-4.49232	-0.0832783	-0.00931554	0.154623	0.117186	0.0276075	-0.144517	-0.0148949	0.0639501	-0.075512	-0.0143294	-0.0246868	0.00254911	-0.0418165	-0.0178414	0.0138788	0.0117953	-0.00308927	0.0230776	-0.0396709	0.0176864	0.0132219	0.0446862
-4.49184	-0.0832709	-0.00928159	0.154626	0.117164	0.02765	-0.144572	-0.0148759	0.0639585	-0.0754896	-0.0142955	-0.0246515	0.00255576	-0.0418076	-0.0178306	0.0139018	0.01179	-0.00308836	0.0230848	-0.0396553	0.017688	0.0132186	0.0446848
-4.49136	-0.0832634	-0.00924763	0.154629	0.117143	0.0276926	-0.144627	-0.014857	0.0639669	-0.0754671	-0.0142616	-0.0246162	0.00256237	-0.0417987	-0.0178198	0.0139248	0.0117847	-0.00308742	0.023092	-0.0396397	0.0176895	0.0132153	0.0446833
-4.49088	-0.0832559	-0.00921366	0.154632	0.117121	0.0277352	-0.144682	-0.014838	0.0639753	-0.0754447	-0.0142277	-0.0245809	0.00256894	-0.0417898	-0.017809	0.0139478	0.0117794	-0.00308647	0.0230992	-0.0396242	0.0176911	0.0132119	0.0446818
-4.4904	-0.0832484	-0.00917965	0.154635	0.117099	0.0277777	-0.144737	-0.0148191	0.0639838	-0.0754222	-0.0141938	-0.0245457	0.00257546	-0.0417809	-0.0177982	0.0139709	0.0117741	-0.00308549	0.0231064	-0.0396086	0.0176927	0.0132086	0.0446803
-4.48992	-0.0832409	-0.00914564	0.154638	0.117078	0.0278203	-0.144792	-0.0148001	0.0639922	-0.0753998	-0.0141599	-0.0245105	0.00258197	-0.041772	-0.0177874	0.0139939	0.0117689	-0.00308449	0.0231136	-0.039593	0.0176944	0.0132052	0.0446788
-4.48944	-0.0832333	-0.0091116	0.15464	0.117056	0.0278629	-0.144847	-0.0147812	0.0640007	-0.0753773	-0.014126	-0.0244753	0.00258846	-0.0417631	-0.0177766	0.014017	0.0117636	-0.00308348	0.0231209	-0.0395775	0.017696	0.0132019	0.0446772
-4.48896	-0.0832257	-0.00907755	0.154643	0.117034	0.0279054	-0.144902	-0.0147622	0.0640092	-0.0753549	-0.014092	-0.0244402	0.0025949	-0.0417541	-0.0177657	0.0140401	0.0117584	-0.00308244	0.0231281	-0.0395619	0.0176977	0.0131984	0.0446757
-4.48848	-0.0832181	-0.00904348	0.154646	0.117012	0.027948	-0.144957	-0.0147433	0.0640177	-0.0753324	-0.0140581	-0.024405	0.00260134	-0.0417452	-0.0177549	0.0140631	0.0117531	-0.0030814	0.0231354	-0.0395463	0.0176994	0.013195	0.0446741
-4.488	-0.0832104	-0.00900939	0.154648	0.11699	0.0279906	-0.145012	-0.0147243	0.0640262	-0.07531	-0.0140242	-0.0243699	0.00260774	-0.0417363	-0.017744	0.0140863	0.0117479	-0.00308033	0.0231426	-0.0395308	0.0177011	0.0131916	0.0446726
-4.48752	-0.0832026	-0.00897526	0.154651	0.116968	0.0280332	-0.145066	-0.0147054	0.0640347	-0.0752875	-0.0139903	-0.0243349	0.00261411	-0.0417274	-0.0177331	0.0141094	0.0117427	-0.00307925	0.0231499	-0.0395152	0.0177028	0.0131882	0.044671
-4.48704	-0.0831949	-0.00894112	0.154653	0.116947	0.0280757	-0.145121	-0.0146864	0.0640432	-0.075265	-0.0139564	-0.0242999	0.00262045	-0.0417185	-0.0177222	0.0141326	0.0117375	-0.00307815	0.0231572	-0.0394997	0.0177045	0.0131847	0.0446693
-4.48656	-0.083187	-0.00890695	0.154656	0.116925	0.0281183	-0.145176	-0.0146675	0.0640518	-0.0752426	-0.0139225	-0.0242649	0.00262679	-0.0417096	-0.0177113	0.0141557	0.0117323	-0.00307705	0.0231644	-0.0394841	0.0177063	0.0131813	0.0446677
-4.48608	-0.0831792	-0.00887277	0.154658	0.116902	0.0281609	-0.145231	-0.0146485	0.0640603	-0.0752201	-0.0138886	-0.0242299	0.00263309	-0.0417007	-0.0177004	0.0141789	0.0117271	-0.00307592	0.0231717	-0.0394686	0.0177081	0.0131778	0.0446661
-4.4856	-0.0831712	-0.00883855	0.154661	0.11688	0.0282035	-0.145286	-0.0146296	0.0640689	-0.0751976	-0.0138547	-0.024195	0.00263937	-0.0416918	-0.0176894	0.0142021	0.0117219	-0.00307478	0.0231789	-0.039453	0.0177099	0.0131743	0.0446644
-4.48512	-0.0831633	-0.00880433	0.154663	0.116858	0.0282461	-0.145341	-0.0146106	0.0640774	-0.0751752	-0.0138207	-0.0241601	0.00264562	-0.0416829	-0.0176785	0.0142254	0.0117167	-0.00307362	0.0231862	-0.0394374	0.0177117	0.0131708	0.0446628
-4.48464	-0.0831553	-0.00877007	0.154665	0.116836	0.0282887	-0.145395	-0.0145917	0.064086	-0.0751527	-0.0137869	-0.0241253	0.00265183	-0.0416739	-0.0176675	0.0142486	0.0117116	-0.00307244	0.0231935	-0.0394219	0.0177136	0.0131673	0.0446611
-4.48416	-0.0831472	-0.0087358	0.154668	0.116814	0.0283313	-0.14545	-0.0145727	0.0640946	-0.0751302	-0.0137529	-0.0240904	0.00265802	-0.041665	-0.0176565	0.0142719	0.0117064	-0.00307125	0.0232008	-0.0394063	0.0177154	0.0131637	0.0446594
-4.48368	-0.083139	-0.00870151	0.15467	0.116792	0.0283739	-0.145505	-0.0145538	0.0641032	-0.0751077	-0.013719	-0.0240556	0.00266418	-0.0416561	-0.0176455	0.0142952	0.0117012	-0.00307004	0.0232081	-0.0393908	0.0177173	0.0131602	0.0446577
-4.4832	-0.0831307	-0.00866718	0.154672	0.11677	0.0284164	-0.14556	-0.0145349	0.0641118	-0.0750853	-0.0136851	-0.0240208	0.0026703	-0.0416472	-0.0176344	0.0143185	0.011696	-0.00306882	0.0232154	-0.0393752	0.0177192	0.0131566	0.044656
-4.48272	-0.0831223	-0.00863285	0.154674	0.116747	0.0284591	-0.145614	-0.0145159	0.0641204	-0.0750628	-0.0136512	-0.0239861	0.0026764	-0.0416383	-0.0176234	0.0143418	0.0116909	-0.00306757	0.0232226	-0.0393597	0.0177211	0.013153	0.0446543
-4.48224	-0.0831138	-0.00859849	0.154676	0.116725	0.0285017	-0.145669	-0.014497	0.0641291	-0.0750404	-0.0136173	-0.0239514	0.00268245	-0.0416294	-0.0176123	0.0143651	0.0116857	-0.00306631	0.0232299	-0.0393441	0.017723	0.0131495	0.0446525
-4.48176	-0.0831053	-0.00856414	0.154679	0.116703	0.0285443	-0.145723	-0.0144781	0.0641377	-0.0750179	-0.0135834	-0.0239168	0.00268848	-0.0416205	-0.0176012	0.0143884	0.0116805	-0.00306502	0.0232372	-0.0393285	0.0177249	0.0131459	0.0446508
-4.48128	-0.0830968	-0.00852975	0.154681	0.11668	0.0285869	-0.145778	-0.0144592	0.0641463	-0.0749954	-0.0135494	-0.0238821	0.00269447	-0.0416115	-0.0175901	0.0144118	0.0116754	-0.00306373	0.0232446	-0.039313	0.0177269	0.0131423	0.044649
-4.4808	-0.0830881	-0.00849536	0.154683	0.116658	0.0286295	-0.145833	-0.0144403	0.064155	-0.0749729	-0.0135155	-0.0238475	0.00270044	-0.0416026	-0.0175791	0.0144352	0.0116702	-0.00306241	0.0232519	-0.0392974	0.0177288	0.0131387	0.0446472
-4.48032	-0.0830794	-0.00846093	0.154685	0.116636	0.0286721	-0.145887	-0.0144213	0.0641636	-0.0749505	-0.0134816	-0.0238129	0.00270635	-0.0415937	-0.017568	0.0144586	0.0116651	-0.00306107	0.0232592	-0.0392818	0.0177308	0.013135	0.0446454
-4.47984	-0.0830705	-0.00842649	0.154687	0.116613	0.0287147	-0.145942	-0.0144024	0.0641723	-0.074928	-0.0134477	-0.0237784	0.00271226	-0.0415847	-0.0175569	0.014482	0.0116599	-0.00305971	0.0232665	-0.0392663	0.0177328	0.0131314	0.0446436
-4.47936	-0.0830617	-0.00839203	0.154689	0.116591	0.0287573	-0.145996	-0.0143835	0.064181	-0.0749056	-0.0134137	-0.0237439	0.00271812	-0.0415758	-0.0175457	0.0145054	0.0116548	-0.00305833	0.0232738	-0.0392507	0.0177348	0.0131278	0.0446418
-4.47888	-0.0830527	-0.00835756	0.154691	0.116568	0.0288	-0.146051	-0.0143646	0.0641897	-0.0748831	-0.0133798	-0.0237094	0.00272396	-0.0415669	-0.0175346	0.0145288	0.0116496	-0.00305694	0.0232811	-0.0392351	0.0177368	0.0131241	0.0446399
-4.4784	-0.0830438	-0.00832306	0.154692	0.116546	0.0288426	-0.146105	-0.0143457	0.0641984	-0.0748606	-0.0133459	-0.023675	0.00272976	-0.0415579	-0.0175235	0.0145523	0.0116444	-0.0030555	0.0232885	-0.0392196	0.0177389	0.0131204	0.0446381
-4.47792	-0.0830348	-0.00828856	0.154694	0.116523	0.0288852	-0.14616	-0.0143267	0.0642071	-0.0748382	-0.013312	-0.0236406	0.00273554	-0.041549	-0.0175124	0.0145757	0.0116393	-0.00305406	0.0232958	-0.039204	0.0177409	0.0131168	0.0446362
-4.47744	-0.0830257	-0.00825401	0.154696	0.116501	0.0289279	-0.146215	-0.0143078	0.0642158	-0.0748157	-0.0132781	-0.0236062	0.00274127	-0.0415401	-0.0175013	0.0145992	0.0116342	-0.0030526	0.0233031	-0.0391884	0.017743	0.0131131	0.0446343
-4.47696	-0.0830166	-0.00821948	0.154698	0.116478	0.0289705	-0.146269	-0.0142889	0.0642245	-0.0747933	-0.0132441	-0.0235718	0.002747	-0.0415312	-0.0174901	0.0146227	0.011629	-0.00305111	0.0233104	-0.0391728	0.0177451	0.0131094	0.0446324
-4.47648	-0.0830074	-0.00818491	0.1547	0.116456	0.0290131	-0.146324	-0.0142699	0.0642333	-0.0747708	-0.0132102	-0.0235375	0.00275268	-0.0415223	-0.017479	0.0146462	0.0116239	-0.0030496	0.0233177	-0.0391572	0.0177472	0.0131057	0.0446304
-4.476	-0.0829982	-0.00815035	0.154701	0.116433	0.0290558	-0.146378	-0.014251	0.064242	-0.0747484	-0.0131763	-0.0235032	0.00275835	-0.0415133	-0.0174678	0.0146697	0.0116187	-0.00304809	0.0233251	-0.0391417	0.0177493	0.0131019	0.0446285
-4.47552	-0.082989	-0.00811575	0.154703	0.116411	0.0290985	-0.146433	-0.014232	0.0642508	-0.074726	-0.0131424	-0.023469	0.00276398	-0.0415044	-0.0174567	0.0146933	0.0116136	-0.00304656	0.0233324	-0.0391261	0.0177514	0.0130982	0.0446265
-4.47504	-0.0829797	-0.00808116	0.154705	0.116388	0.0291411	-0.146488	-0.0142131	0.0642595	-0.0747035	-0.0131085	-0.0234348	0.0027696	-0.0414955	-0.0174455	0.0147168	0.0116085	-0.003045	0.0233397	-0.0391105	0.0177536	0.0130945	0.0446245
-4.47456	-0.0829703	-0.00804654	0.154706	0.116365	0.0291838	-0.146542	-0.0141941	0.0642683	-0.0746811	-0.0130745	-0.0234006	0.00277519	-0.0414865	-0.0174343	0.0147404	0.0116034	-0.00304343	0.023347	-0.0390949	0.0177558	0.0130907	0.0446225
-4.47408	-0.0829609	-0.0080119	0.154708	0.116342	0.0292264	-0.146597	-0.0141752	0.0642771	-0.0746587	-0.0130406	-0.0233664	0.00278073	-0.0414776	-0.0174232	0.014764	0.0115984	-0.00304184	0.0233544	-0.0390793	0.017758	0.0130869	0.0446205
-4.4736	-0.0829514	-0.00797725	0.154709	0.11632	0.0292691	-0.146652	-0.0141562	0.0642858	-0.0746362	-0.0130067	-0.0233323	0.00278625	-0.0414687	-0.017412	0.0147876	0.0115933	-0.00304024	0.0233617	-0.0390638	0.0177602	0.0130831	0.0446185
-4.47312	-0.0829419	-0.00794258	0.154711	0.116297	0.0293118	-0.146706	-0.0141373	0.0642946	-0.0746138	-0.0129728	-0.0232981	0.00279174	-0.0414598	-0.0174008	0.0148112	0.0115883	-0.00303862	0.023369	-0.0390482	0.0177624	0.0130793	0.0446164
-4.47264	-0.0829324	-0.0079079	0.154712	0.116274	0.0293545	-0.146761	-0.0141183	0.0643034	-0.0745914	-0.0129389	-0.023264	0.0027972	-0.0414508	-0.0173896	0.0148348	0.0115832	-0.00303698	0.0233764	-0.0390326	0.0177647	0.0130755	0.0446144
-4.47216	-0.0829227	-0.00787322	0.154714	0.116251	0.0293972	-0.146816	-0.0140993	0.0643122	-0.074569	-0.0129049	-0.02323	0.00280265	-0.0414419	-0.0173783	0.0148584	0.0115782	-0.00303533	0.0233837	-0.039017	0.017767	0.0130717	0.0446123
-4.47168	-0.0829131	-0.00783853	0.154715	0.116228	0.0294399	-0.14687	-0.0140803	0.064321	-0.0745466	-0.012871	-0.0231959	0.00280806	-0.0414329	-0.0173671	0.0148821	0.0115731	-0.00303365	0.023391	-0.0390015	0.0177693	0.0130679	0.0446102
-4.4712	-0.0829034	-0.00780383	0.154717	0.116205	0.0294826	-0.146925	-0.0140613	0.0643298	-0.0745241	-0.0128371	-0.0231619	0.00281345	-0.041424	-0.0173558	0.0149058	0.0115681	-0.00303197	0.0233984	-0.0389859	0.0177716	0.013064	0.0446081
-4.47072	-0.0828936	-0.00776912	0.154718	0.116182	0.0295253	-0.14698	-0.0140423	0.0643387	-0.0745017	-0.0128032	-0.0231279	0.0028188	-0.0414151	-0.0173446	0.0149294	0.0115631	-0.00303027	0.0234057	-0.0389703	0.0177739	0.0130602	0.0446059
-4.47024	-0.0828838	-0.0077344	0.154719	0.116159	0.029568	-0.147035	-0.0140233	0.0643475	-0.0744793	-0.0127693	-0.023094	0.00282416	-0.0414061	-0.0173333	0.0149531	0.011558	-0.00302855	0.0234131	-0.0389547	0.0177763	0.0130563	0.0446038
-4.46976	-0.0828739	-0.00769966	0.15472	0.116136	0.0296107	-0.14709	-0.0140043	0.0643564	-0.0744569	-0.0127353	-0.0230601	0.00282947	-0.0413972	-0.017322	0.0149768	0.011553	-0.0030268	0.0234204	-0.0389392	0.0177786	0.0130524	0.0446016
-4.46928	-0.0828642	-0.00766491	0.154722	0.116113	0.0296534	-0.147144	-0.0139853	0.0643652	-0.0744345	-0.0127014	-0.0230262	0.00283475	-0.0413882	-0.0173107	0.0150005	0.011548	-0.00302506	0.0234277	-0.0389236	0.017781	0.0130485	0.0445994
-4.4688	-0.0828544	-0.00763015	0.154723	0.11609	0.0296961	-0.147199	-0.0139663	0.0643741	-0.0744121	-0.0126675	-0.0229923	0.00284	-0.0413793	-0.0172994	0.0150242	0.011543	-0.00302328	0.0234351	-0.038908	0.0177835	0.0130446	0.0445972
-4.46832	-0.0828446	-0.00759538	0.154724	0.116067	0.0297389	-0.147254	-0.0139472	0.0643829	-0.0743897	-0.0126335	-0.0229584	0.00284525	-0.0413704	-0.017288	0.0150479	0.0115379	-0.00302149	0.0234424	-0.0388924	0.0177859	0.0130407	0.044595
-4.46784	-0.0828349	-0.00756059	0.154725	0.116044	0.0297816	-0.147309	-0.0139282	0.0643918	-0.0743673	-0.0125996	-0.0229246	0.00285045	-0.0413614	-0.0172767	0.0150717	0.0115329	-0.00301968	0.0234498	-0.0388769	0.0177884	0.0130368	0.0445928
-4.46736	-0.0828252	-0.00752578	0.154726	0.116021	0.0298244	-0.147364	-0.0139092	0.0644007	-0.0743449	-0.0125657	-0.0228908	0.00285562	-0.0413525	-0.0172654	0.0150954	0.0115279	-0.00301785	0.0234572	-0.0388613	0.0177909	0.0130328	0.0445905
-4.46688	-0.0828154	-0.00749098	0.154727	0.115998	0.0298671	-0.147419	-0.0138901	0.0644096	-0.0743226	-0.0125318	-0.022857	0.00286077	-0.0413436	-0.017254	0.0151192	0.0115229	-0.003016	0.0234645	-0.0388457	0.0177934	0.0130288	0.0445882
-4.4664	-0.0828056	-0.00745614	0.154728	0.115975	0.0299099	-0.147474	-0.0138711	0.0644184	-0.0743002	-0.0124979	-0.0228232	0.00286589	-0.0413346	-0.0172427	0.015143	0.0115179	-0.00301414	0.0234719	-0.0388302	0.0177959	0.0130249	0.0445859
-4.46592	-0.0827958	-0.0074213	0.154729	0.115952	0.0299526	-0.147529	-0.013852	0.0644273	-0.0742778	-0.0124639	-0.0227895	0.00287098	-0.0413257	-0.0172314	0.0151668	0.0115129	-0.00301226	0.0234793	-0.0388146	0.0177984	0.0130209	0.0445836
-4.46544	-0.0827859	-0.00738643	0.15473	0.115928	0.0299954	-0.147584	-0.0138329	0.0644362	-0.0742554	-0.01243	-0.0227557	0.00287605	-0.0413167	-0.01722	0.0151906	0.0115079	-0.00301035	0.0234867	-0.038799	0.017801	0.0130169	0.0445813
-4.46496	-0.082776	-0.00735157	0.154731	0.115905	0.0300382	-0.147639	-0.0138138	0.0644451	-0.074233	-0.0123961	-0.022722	0.00288111	-0.0413078	-0.0172087	0.0152144	0.0115029	-0.00300843	0.023494	-0.0387834	0.0178036	0.0130128	0.044579
-4.46448	-0.0827663	-0.00731666	0.154732	0.115882	0.030081	-0.147694	-0.0137948	0.0644541	-0.0742107	-0.0123622	-0.0226884	0.00288613	-0.0412989	-0.0171973	0.0152382	0.0114979	-0.00300648	0.0235014	-0.0387679	0.0178062	0.0130088	0.0445766
-4.464	-0.0827565	-0.00728173	0.154733	0.115859	0.0301238	-0.147749	-0.0137757	0.064463	-0.0741883	-0.0123283	-0.0226547	0.00289112	-0.04129	-0.017186	0.0152621	0.0114929	-0.00300452	0.0235088	-0.0387523	0.0178088	0.0130048	0.0445742
-4.46352	-0.0827468	-0.00724681	0.154733	0.115835	0.0301665	-0.147804	-0.0137566	0.0644719	-0.0741659	-0.0122944	-0.0226211	0.00289612	-0.0412811	-0.0171746	0.0152859	0.011488	-0.00300255	0.0235162	-0.0387367	0.0178114	0.0130007	0.0445718
-4.46304	-0.082737	-0.00721186	0.154734	0.115812	0.0302093	-0.147859	-0.0137375	0.0644808	-0.0741435	-0.0122605	-0.0225875	0.00290106	-0.0412722	-0.0171633	0.0153098	0.011483	-0.00300056	0.0235236	-0.0387211	0.0178141	0.0129966	0.0445694
-4.46256	-0.0827272	-0.0071769	0.154735	0.115789	0.0302521	-0.147914	-0.0137183	0.0644898	-0.0741211	-0.0122265	-0.0225539	0.00290601	-0.0412633	-0.0171519	0.0153336	0.011478	-0.00299855	0.023531	-0.0387056	0.0178168	0.0129925	0.044567
-4.46208	-0.0827174	-0.00714191	0.154735	0.115765	0.0302949	-0.147969	-0.0136992	0.0644987	-0.0740988	-0.0121926	-0.0225204	0.0029109	-0.0412544	-0.0171405	0.0153575	0.0114731	-0.00299653	0.0235384	-0.03869	0.0178195	0.0129884	0.0445646
-4.4616	-0.0827075	-0.00710695	0.154736	0.115742	0.0303378	-0.148024	-0.0136801	0.0645077	-0.0740764	-0.0121587	-0.0224868	0.00291577	-0.0412455	-0.0171291	0.0153814	0.0114681	-0.00299448	0.0235459	-0.0386744	0.0178222	0.0129843	0.0445621
-4.46112	-0.0826976	-0.00707193	0.154737	0.115718	0.0303806	-0.148079	-0.013661	0.0645166	-0.074054	-0.0121248	-0.0224533	0.00292059	-0.0412366	-0.0171177	0.0154053	0.0114632	-0.00299242	0.0235533	-0.0386589	0.0178249	0.0129801	0.0445596
-4.46064	-0.0826877	-0.00703694	0.154737	0.115695	0.0304234	-0.148134	-0.0136418	0.0645256	-0.0740317	-0.0120909	-0.0224198	0.00292539	-0.0412277	-0.0171063	0.0154292	0.0114582	-0.00299035	0.0235607	-0.0386433	0.0178277	0.012976	0.0445571
-4.46016	-0.0826778	-0.00700192	0.154738	0.115671	0.0304662	-0.148189	-0.0136227	0.0645345	-0.0740093	-0.0120569	-0.0223863	0.00293014	-0.0412188	-0.0170949	0.0154531	0.0114533	-0.00298827	0.0235681	-0.0386278	0.0178304	0.0129718	0.0445546
-4.45968	-0.0826679	-0.00696689	0.154738	0.115648	0.0305091	-0.148245	-0.0136037	0.0645435	-0.0739869	-0.012023	-0.0223529	0.00293488	-0.0412099	-0.0170835	0.015477	0.0114483	-0.00298618	0.0235756	-0.0386122	0.0178333	0.0129676	0.0445521
-4.4592	-0.0826579	-0.00693185	0.154739	0.115624	0.0305519	-0.1483	-0.0135846	0.0645525	-0.0739645	-0.0119891	-0.0223195	0.00293956	-0.041201	-0.0170721	0.0155009	0.0114434	-0.00298406	0.023583	-0.0385967	0.0178361	0.0129634	0.0445496
-4.45872	-0.0826478	-0.00689679	0.154739	0.115601	0.0305948	-0.148355	-0.0135655	0.0645615	-0.0739421	-0.0119552	-0.0222861	0.00294422	-0.0411921	-0.0170607	0.0155249	0.0114384	-0.00298193	0.0235904	-0.0385811	0.0178389	0.0129592	0.044547
-4.45824	-0.0826376	-0.00686173	0.15474	0.115577	0.0306376	-0.14841	-0.0135465	0.0645705	-0.0739198	-0.0119213	-0.0222527	0.00294883	-0.0411832	-0.0170492	0.0155489	0.0114335	-0.00297978	0.0235979	-0.0385656	0.0178418	0.012955	0.0445444
-4.45776	-0.0826274	-0.00682665	0.15474	0.115553	0.0306805	-0.148465	-0.0135274	0.0645795	-0.0738974	-0.0118874	-0.0222193	0.00295341	-0.0411743	-0.0170377	0.0155728	0.0114285	-0.00297762	0.0236053	-0.03855	0.0178447	0.0129507	0.0445419
-4.45728	-0.0826172	-0.00679156	0.154741	0.11553	0.0307234	-0.148521	-0.0135084	0.0645885	-0.073875	-0.0118534	-0.022186	0.00295793	-0.0411655	-0.0170263	0.0155968	0.0114236	-0.00297543	0.0236128	-0.0385345	0.0178476	0.0129465	0.0445393
-4.4568	-0.0826069	-0.00675646	0.154741	0.115506	0.0307663	-0.148576	-0.0134893	0.0645975	-0.0738526	-0.0118195	-0.0221526	0.00296245	-0.0411566	-0.0170149	0.0156208	0.0114187	-0.00297324	0.0236202	-0.0385189	0.0178506	0.0129422	0.0445366
-4.45632	-0.0825966	-0.00672133	0.154741	0.115482	0.0308092	-0.148631	-0.0134702	0.0646065	-0.0738302	-0.0117855	-0.0221193	0.00296691	-0.0411477	-0.0170034	0.0156448	0.0114138	-0.00297103	0.0236277	-0.0385034	0.0178535	0.0129379	0.044534
-4.45584	-0.0825862	-0.0066862	0.154741	0.115459	0.0308521	-0.148686	-0.0134512	0.0646156	-0.0738078	-0.0117516	-0.0220861	0.00297136	-0.0411388	-0.016992	0.0156688	0.0114088	-0.0029688	0.0236351	-0.0384878	0.0178565	0.0129336	0.0445313
-4.45536	-0.0825756	-0.00665104	0.154742	0.115435	0.0308949	-0.148742	-0.0134321	0.0646246	-0.0737854	-0.0117177	-0.0220528	0.00297576	-0.04113	-0.0169805	0.0156928	0.0114039	-0.00296656	0.0236426	-0.0384722	0.0178595	0.0129293	0.0445287
-4.45488	-0.0825651	-0.00661588	0.154742	0.115411	0.0309379	-0.148797	-0.0134131	0.0646336	-0.073763	-0.0116838	-0.0220195	0.00298015	-0.0411211	-0.0169691	0.0157169	0.011399	-0.00296431	0.02365	-0.0384567	0.0178625	0.012925	0.044526
-4.4544	-0.0825545	-0.00658071	0.154742	0.115388	0.0309808	-0.148852	-0.013394	0.0646427	-0.0737406	-0.0116498	-0.0219863	0.00298451	-0.0411123	-0.0169576	0.0157409	0.0113941	-0.00296204	0.0236575	-0.0384411	0.0178656	0.0129206	0.0445233
-4.45392	-0.0825438	-0.00654551	0.154742	0.115364	0.0310237	-0.148907	-0.013375	0.0646517	-0.0737182	-0.0116159	-0.0219531	0.00298884	-0.0411034	-0.0169461	0.015765	0.0113892	-0.00295976	0.023665	-0.0384256	0.0178686	0.0129163	0.0445205
-4.45344	-0.0825331	-0.00651032	0.154742	0.11534	0.0310666	-0.148963	-0.0133559	0.0646608	-0.0736958	-0.011582	-0.0219199	0.00299313	-0.0410946	-0.0169346	0.0157891	0.0113843	-0.00295746	0.0236724	-0.03841	0.0178717	0.0129119	0.0445178
-4.45296	-0.0825223	-0.00647511	0.154742	0.115316	0.0311095	-0.149018	-0.0133369	0.0646698	-0.0736734	-0.011548	-0.0218867	0.00299742	-0.0410858	-0.0169231	0.0158131	0.0113794	-0.00295515	0.0236799	-0.0383944	0.0178748	0.0129075	0.0445151
-4.45248	-0.0825116	-0.00643989	0.154742	0.115293	0.0311525	-0.149073	-0.0133178	0.0646789	-0.073651	-0.0115141	-0.0218535	0.00300168	-0.0410769	-0.0169116	0.0158372	0.0113745	-0.00295282	0.0236874	-0.0383789	0.0178779	0.0129031	0.0445123
-4.452	-0.0825007	-0.00640467	0.154742	0.115269	0.0311954	-0.149128	-0.0132988	0.064688	-0.0736286	-0.0114802	-0.0218203	0.00300595	-0.0410681	-0.0169001	0.0158613	0.0113696	-0.00295049	0.0236948	-0.0383633	0.0178811	0.0128987	0.0445095
-4.45152	-0.0824898	-0.00636943	0.154742	0.115245	0.0312384	-0.149184	-0.0132797	0.0646971	-0.0736063	-0.0114462	-0.0217871	0.00301019	-0.0410593	-0.0168886	0.0158855	0.0113647	-0.00294813	0.0237023	-0.0383477	0.0178843	0.0128943	0.0445067
-4.45104	-0.0824789	-0.00633419	0.154742	0.115221	0.0312814	-0.149239	-0.0132607	0.0647062	-0.0735839	-0.0114123	-0.021754	0.00301441	-0.0410505	-0.016877	0.0159096	0.0113598	-0.00294577	0.0237098	-0.0383322	0.0178875	0.0128898	0.0445039
-4.45056	-0.082468	-0.00629894	0.154742	0.115197	0.0313243	-0.149294	-0.0132417	0.0647153	-0.0735615	-0.0113784	-0.0217209	0.0030186	-0.0410417	-0.0168655	0.0159337	0.0113549	-0.00294339	0.0237173	-0.0383166	0.0178907	0.0128854	0.044501
-4.45008	-0.0824571	-0.00626368	0.154741	0.115173	0.0313673	-0.149349	-0.0132227	0.0647244	-0.0735391	-0.0113445	-0.0216877	0.00302279	-0.0410329	-0.0168539	0.0159579	0.01135	-0.002941	0.0237248	-0.038301	0.0178939	0.0128809	0.0444982
-4.4496	-0.0824462	-0.00622841	0.154741	0.115149	0.0314103	-0.149405	-0.0132037	0.0647335	-0.0735167	-0.0113105	-0.0216546	0.00302695	-0.0410241	-0.0168423	0.0159821	0.011345	-0.00293859	0.0237323	-0.0382854	0.0178972	0.0128764	0.0444953
-4.44912	-0.0824352	-0.00619315	0.154741	0.115125	0.0314532	-0.14946	-0.0131847	0.0647426	-0.0734944	-0.0112766	-0.0216215	0.00303109	-0.0410153	-0.0168308	0.0160062	0.0113401	-0.00293616	0.0237398	-0.0382699	0.0179005	0.0128719	0.0444925
-4.44864	-0.0824241	-0.00615788	0.154741	0.115101	0.0314962	-0.149515	-0.0131656	0.0647518	-0.073472	-0.0112427	-0.0215884	0.00303521	-0.0410065	-0.0168192	0.0160304	0.0113352	-0.00293372	0.0237473	-0.0382543	0.0179038	0.0128673	0.0444896
-4.44816	-0.082413	-0.0061226	0.15474	0.115077	0.0315392	-0.14957	-0.0131466	0.0647609	-0.0734496	-0.0112088	-0.0215553	0.00303932	-0.0409977	-0.0168077	0.0160546	0.0113303	-0.00293127	0.0237548	-0.0382387	0.0179071	0.0128628	0.0444866
-4.44768	-0.0824019	-0.00608734	0.15474	0.115053	0.0315822	-0.149626	-0.0131276	0.06477	-0.0734273	-0.0111749	-0.0215222	0.0030434	-0.040989	-0.0167961	0.0160788	0.0113254	-0.0029288	0.0237624	-0.0382231	0.0179105	0.0128582	0.0444837
-4.4472	-0.0823908	-0.00605205	0.154739	0.115029	0.0316252	-0.149681	-0.0131087	0.0647792	-0.0734049	-0.0111409	-0.0214892	0.00304749	-0.0409802	-0.0167845	0.016103	0.0113204	-0.00292631	0.0237699	-0.0382076	0.0179139	0.0128536	0.0444808
-4.44672	-0.0823796	-0.00601677	0.154739	0.115005	0.0316682	-0.149736	-0.0130897	0.0647883	-0.0733825	-0.011107	-0.0214561	0.00305155	-0.0409715	-0.0167729	0.0161272	0.0113155	-0.0029238	0.0237774	-0.038192	0.0179173	0.012849	0.0444778
-4.44624	-0.0823684	-0.00598148	0.154738	0.114981	0.0317112	-0.149791	-0.0130707	0.0647975	-0.0733601	-0.0110731	-0.0214231	0.0030556	-0.0409627	-0.0167613	0.0161514	0.0113106	-0.00292129	0.023785	-0.0381764	0.0179207	0.0128444	0.0444748
-4.44576	-0.0823571	-0.00594619	0.154738	0.114957	0.0317542	-0.149847	-0.0130517	0.0648066	-0.0733378	-0.0110392	-0.0213901	0.00305964	-0.040954	-0.0167497	0.0161757	0.0113056	-0.00291875	0.0237926	-0.0381609	0.0179241	0.0128398	0.0444718
-4.44528	-0.0823458	-0.00591089	0.154737	0.114933	0.0317972	-0.149902	-0.0130327	0.0648158	-0.0733154	-0.0110053	-0.0213571	0.00306368	-0.0409452	-0.016738	0.0161999	0.0113007	-0.0029162	0.0238001	-0.0381453	0.0179276	0.0128351	0.0444688
-4.4448	-0.0823344	-0.00587559	0.154737	0.114909	0.0318403	-0.149957	-0.0130138	0.064825	-0.073293	-0.0109714	-0.0213241	0.0030677	-0.0409365	-0.0167264	0.0162241	0.0112958	-0.00291365	0.0238077	-0.0381297	0.0179311	0.0128304	0.0444657
-4.44432	-0.0823231	-0.00584028	0.154736	0.114884	0.0318833	-0.150012	-0.0129948	0.0648341	-0.0732706	-0.0109375	-0.0212911	0.00307172	-0.0409278	-0.0167147	0.0162484	0.0112909	-0.00291108	0.0238153	-0.0381142	0.0179346	0.0128257	0.0444626
-4.44384	-0.0823115	-0.00580495	0.154735	0.11486	0.0319263	-0.150068	-0.0129759	0.0648433	-0.0732483	-0.0109035	-0.0212582	0.0030757	-0.0409191	-0.016703	0.0162727	0.0112859	-0.00290848	0.0238229	-0.0380986	0.0179381	0.0128211	0.0444595
-4.44336	-0.0823	-0.00576962	0.154735	0.114836	0.0319693	-0.150123	-0.0129569	0.0648525	-0.0732258	-0.0108696	-0.0212253	0.00307967	-0.0409104	-0.0166914	0.0162969	0.011281	-0.00290588	0.0238305	-0.038083	0.0179417	0.0128163	0.0444564
-4.44288	-0.0822884	-0.00573427	0.154734	0.114812	0.0320123	-0.150178	-0.012938	0.0648617	-0.0732035	-0.0108357	-0.0211923	0.00308364	-0.0409017	-0.0166797	0.0163212	0.0112761	-0.00290326	0.0238381	-0.0380674	0.0179453	0.0128116	0.0444533
-4.4424	-0.0822768	-0.00569894	0.154733	0.114787	0.0320553	-0.150233	-0.012919	0.0648709	-0.073181	-0.0108018	-0.0211594	0.00308758	-0.0408931	-0.016668	0.0163455	0.0112712	-0.00290062	0.0238457	-0.0380519	0.0179489	0.0128068	0.0444502
-4.44192	-0.0822651	-0.00566357	0.154732	0.114763	0.0320984	-0.150288	-0.0129001	0.0648801	-0.0731586	-0.0107679	-0.0211265	0.0030915	-0.0408844	-0.0166564	0.0163698	0.0112662	-0.00289799	0.0238533	-0.0380363	0.0179525	0.0128021	0.044447
-4.44144	-0.0822534	-0.00562821	0.154731	0.114738	0.0321414	-0.150343	-0.0128812	0.0648893	-0.0731362	-0.0107341	-0.0210937	0.00309543	-0.0408757	-0.0166447	0.0163941	0.0112613	-0.00289532	0.0238609	-0.0380207	0.0179562	0.0127973	0.0444438
-4.44096	-0.0822418	-0.00559283	0.15473	0.114714	0.0321844	-0.150398	-0.0128623	0.0648985	-0.0731138	-0.0107002	-0.0210607	0.00309933	-0.0408671	-0.016633	0.0164184	0.0112564	-0.00289265	0.0238685	-0.0380051	0.0179599	0.0127925	0.0444406
-4.44048	-0.0822301	-0.00555746	0.15473	0.11469	0.0322274	-0.150454	-0.0128434	0.0649077	-0.0730914	-0.0106663	-0.0210279	0.00310324	-0.0408584	-0.0166214	0.0164426	0.0112515	-0.00288996	0.0238762	-0.0379895	0.0179636	0.0127877	0.0444374
-4.44	-0.0822183	-0.00552207	0.154729	0.114665	0.0322704	-0.150509	-0.0128246	0.064917	-0.073069	-0.0106324	-0.020995	0.0031071	-0.0408498	-0.0166097	0.016467	0.0112465	-0.00288726	0.0238838	-0.0379739	0.0179674	0.0127828	0.0444342
-4.43952	-0.0822066	-0.00548667	0.154727	0.114641	0.0323135	-0.150564	-0.0128057	0.0649262	-0.0730465	-0.0105985	-0.0209622	0.00311095	-0.0408412	-0.016598	0.0164913	0.0112416	-0.00288455	0.0238914	-0.0379583	0.0179712	0.0127779	0.044431
-4.43904	-0.082195	-0.00545128	0.154726	0.114616	0.0323565	-0.150619	-0.0127868	0.0649354	-0.0730241	-0.0105646	-0.0209294	0.00311477	-0.0408325	-0.0165863	0.0165156	0.0112367	-0.00288182	0.0238991	-0.0379426	0.017975	0.0127731	0.0444277
-4.43856	-0.0821833	-0.00541586	0.154725	0.114592	0.0323995	-0.150674	-0.0127679	0.0649447	-0.0730017	-0.0105307	-0.0208966	0.00311858	-0.0408239	-0.0165746	0.0165399	0.0112318	-0.00287908	0.0239067	-0.0379271	0.0179788	0.0127682	0.0444244
-4.43808	-0.0821716	-0.00538045	0.154724	0.114567	0.0324425	-0.150729	-0.0127491	0.0649539	-0.0729792	-0.0104968	-0.0208637	0.00312235	-0.0408153	-0.0165629	0.0165642	0.0112268	-0.00287632	0.0239144	-0.0379114	0.0179826	0.0127633	0.0444212
-4.4376	-0.08216	-0.00534503	0.154723	0.114542	0.0324855	-0.150784	-0.0127302	0.0649632	-0.0729568	-0.0104629	-0.020831	0.00312609	-0.0408066	-0.0165512	0.0165886	0.0112219	-0.00287354	0.023922	-0.0378958	0.0179865	0.0127583	0.0444178
-4.43712	-0.0821483	-0.00530962	0.154722	0.114518	0.0325286	-0.150839	-0.0127114	0.0649724	-0.0729344	-0.0104291	-0.0207981	0.00312982	-0.040798	-0.0165395	0.0166129	0.0112169	-0.00287076	0.0239297	-0.0378802	0.0179904	0.0127534	0.0444145
-4.43664	-0.0821365	-0.00527418	0.15472	0.114493	0.0325716	-0.150894	-0.0126925	0.0649817	-0.0729119	-0.0103952	-0.0207653	0.00313354	-0.0407894	-0.0165278	0.0166372	0.011212	-0.00286796	0.0239374	-0.0378646	0.0179944	0.0127484	0.0444112
-4.43616	-0.0821248	-0.00523875	0.154719	0.114468	0.0326146	-0.150948	-0.0126736	0.064991	-0.0728895	-0.0103613	-0.0207325	0.00313725	-0.0407808	-0.0165161	0.0166616	0.0112071	-0.00286514	0.023945	-0.037849	0.0179983	0.0127435	0.0444078
-4.43568	-0.0821128	-0.00520331	0.154718	0.114444	0.0326576	-0.151003	-0.0126547	0.0650002	-0.072867	-0.0103275	-0.0206998	0.00314093	-0.0407722	-0.0165044	0.0166859	0.0112021	-0.00286232	0.0239527	-0.0378334	0.0180023	0.0127384	0.0444044
-4.4352	-0.0821008	-0.00516787	0.154716	0.114419	0.0327007	-0.151058	-0.0126358	0.0650095	-0.0728446	-0.0102936	-0.020667	0.00314462	-0.0407636	-0.0164927	0.0167103	0.0111972	-0.00285947	0.0239604	-0.0378178	0.0180063	0.0127334	0.044401
-4.43472	-0.0820887	-0.00513241	0.154715	0.114394	0.0327437	-0.151113	-0.012617	0.0650188	-0.0728221	-0.0102597	-0.0206343	0.0031483	-0.040755	-0.0164809	0.0167346	0.0111922	-0.00285662	0.0239681	-0.0378021	0.0180104	0.0127284	0.0443976
-4.43424	-0.0820766	-0.00509694	0.154713	0.114369	0.0327867	-0.151168	-0.0125981	0.0650281	-0.0727997	-0.0102259	-0.0206016	0.00315193	-0.0407464	-0.0164692	0.016759	0.0111872	-0.00285375	0.0239757	-0.0377865	0.0180144	0.0127233	0.0443942
-4.43376	-0.0820643	-0.00506147	0.154712	0.114344	0.0328297	-0.151223	-0.0125792	0.0650373	-0.0727772	-0.010192	-0.0205689	0.00315558	-0.0407378	-0.0164575	0.0167833	0.0111823	-0.00285087	0.0239834	-0.0377709	0.0180185	0.0127182	0.0443907
-4.43328	-0.082052	-0.00502598	0.15471	0.114319	0.0328728	-0.151278	-0.0125603	0.0650466	-0.0727548	-0.0101581	-0.0205362	0.0031592	-0.0407292	-0.0164458	0.0168077	0.0111773	-0.00284797	0.0239911	-0.0377553	0.0180227	0.0127132	0.0443872
-4.4328	-0.0820396	-0.00499049	0.154709	0.114294	0.0329158	-0.151332	-0.0125413	0.0650559	-0.0727323	-0.0101243	-0.0205035	0.00316284	-0.0407206	-0.0164341	0.016832	0.0111724	-0.00284508	0.0239988	-0.0377397	0.0180268	0.0127081	0.0443838
-4.43232	-0.0820272	-0.004955	0.154707	0.114269	0.0329588	-0.151387	-0.0125224	0.0650652	-0.0727099	-0.0100904	-0.0204709	0.00316643	-0.040712	-0.0164223	0.0168564	0.0111674	-0.00284216	0.0240066	-0.0377241	0.018031	0.0127029	0.0443802
-4.43184	-0.0820146	-0.0049195	0.154705	0.114244	0.0330018	-0.151442	-0.0125034	0.0650745	-0.0726874	-0.0100566	-0.0204383	0.00317006	-0.0407034	-0.0164106	0.0168808	0.0111625	-0.00283924	0.0240143	-0.0377084	0.0180352	0.0126978	0.0443767
-4.43136	-0.0820021	-0.004884	0.154704	0.114219	0.0330448	-0.151497	-0.0124845	0.0650838	-0.0726649	-0.0100228	-0.0204056	0.00317365	-0.0406948	-0.0163988	0.0169051	0.0111575	-0.00283631	0.024022	-0.0376928	0.0180394	0.0126926	0.0443732
-4.43088	-0.0819894	-0.00484849	0.154702	0.114194	0.0330878	-0.151552	-0.0124655	0.0650931	-0.0726424	-0.00998897	-0.0203731	0.00317728	-0.0406863	-0.0163871	0.0169295	0.0111526	-0.00283337	0.0240297	-0.0376772	0.0180436	0.0126874	0.0443696
-4.4304	-0.0819767	-0.00481297	0.1547	0.114169	0.0331308	-0.151607	-0.0124465	0.0651024	-0.0726199	-0.00995513	-0.0203405	0.00318087	-0.0406777	-0.0163754	0.0169539	0.0111476	-0.00283042	0.0240374	-0.0376616	0.0180479	0.0126822	0.044366
-4.42992	-0.0819641	-0.00477745	0.154698	0.114143	0.0331739	-0.151661	-0.0124275	0.0651117	-0.0725974	-0.00992133	-0.0203079	0.00318445	-0.0406691	-0.0163636	0.0169783	0.0111427	-0.00282746	0.0240452	-0.0376459	0.0180522	0.012677	0.0443624
-4.42944	-0.0819514	-0.00474193	0.154696	0.114118	0.0332169	-0.151716	-0.0124086	0.065121	-0.072575	-0.00988752	-0.0202754	0.00318801	-0.0406605	-0.0163519	0.0170027	0.0111377	-0.00282449	0.0240529	-0.0376303	0.0180566	0.0126717	0.0443587
-4.42896	-0.0819386	-0.00470638	0.154694	0.114093	0.0332599	-0.151771	-0.0123896	0.0651303	-0.0725525	-0.00985371	-0.0202429	0.00319159	-0.040652	-0.0163401	0.0170271	0.0111328	-0.00282151	0.0240607	-0.0376147	0.0180609	0.0126664	0.0443551
-4.42848	-0.0819259	-0.00467085	0.154692	0.114067	0.0333029	-0.151826	-0.0123705	0.0651396	-0.07253	-0.0098199	-0.0202103	0.00319517	-0.0406434	-0.0163284	0.0170514	0.0111278	-0.00281853	0.0240684	-0.0375991	0.0180653	0.0126612	0.0443514
-4.428	-0.0819132	-0.00463531	0.15469	0.114042	0.0333459	-0.15188	-0.0123516	0.0651489	-0.0725075	-0.00978612	-0.0201779	0.00319875	-0.0406349	-0.0163167	0.0170758	0.0111229	-0.00281553	0.0240762	-0.0375835	0.0180697	0.0126559	0.0443477
-4.42752	-0.0819004	-0.00459976	0.154688	0.114016	0.033389	-0.151935	-0.0123325	0.0651583	-0.072485	-0.00975232	-0.0201454	0.00320234	-0.0406263	-0.016305	0.0171002	0.011118	-0.00281253	0.024084	-0.0375679	0.0180741	0.0126505	0.044344
-4.42704	-0.0818877	-0.00456421	0.154686	0.113991	0.033432	-0.15199	-0.0123135	0.0651676	-0.0724624	-0.00971854	-0.0201129	0.00320594	-0.0406178	-0.0162933	0.0171246	0.011113	-0.00280951	0.0240917	-0.0375523	0.0180786	0.0126452	0.0443403
-4.42656	-0.0818749	-0.00452866	0.154684	0.113965	0.033475	-0.152044	-0.0122945	0.0651769	-0.0724399	-0.00968476	-0.0200805	0.00320951	-0.0406092	-0.0162816	0.017149	0.0111081	-0.00280649	0.0240995	-0.0375367	0.0180831	0.0126398	0.0443365
-4.42608	-0.0818621	-0.00449312	0.154682	0.11394	0.033518	-0.152099	-0.0122754	0.0651862	-0.0724174	-0.00965098	-0.0200481	0.0032131	-0.0406007	-0.0162699	0.0171734	0.0111031	-0.00280345	0.0241073	-0.0375211	0.0180876	0.0126344	0.0443327
-4.4256	-0.0818494	-0.00445756	0.15468	0.113914	0.033561	-0.152154	-0.0122564	0.0651955	-0.0723949	-0.00961718	-0.0200156	0.00321671	-0.0405922	-0.0162582	0.0171978	0.0110981	-0.00280042	0.0241151	-0.0375055	0.0180922	0.012629	0.0443289
-4.42512	-0.0818367	-0.00442204	0.154677	0.113889	0.0336041	-0.152208	-0.0122373	0.0652048	-0.0723724	-0.00958342	-0.0199833	0.00322029	-0.0405836	-0.0162465	0.0172222	0.0110932	-0.00279736	0.0241229	-0.0374899	0.0180968	0.0126236	0.0443251
-4.42464	-0.0818239	-0.00438649	0.154675	0.113863	0.0336471	-0.152263	-0.0122183	0.0652141	-0.0723499	-0.00954962	-0.0199509	0.0032239	-0.0405751	-0.0162347	0.0172466	0.0110882	-0.0027943	0.0241307	-0.0374743	0.0181014	0.0126181	0.0443213
-4.42416	-0.0818111	-0.00435096	0.154673	0.113837	0.0336901	-0.152317	-0.0121992	0.0652234	-0.0723273	-0.00951587	-0.0199186	0.00322751	-0.0405666	-0.016223	0.017271	0.0110832	-0.00279124	0.0241385	-0.0374587	0.018106	0.0126127	0.0443174
-4.42368	-0.0817983	-0.00431544	0.15467	0.113812	0.0337332	-0.152372	-0.0121801	0.0652328	-0.0723048	-0.00948205	-0.0198862	0.00323112	-0.0405581	-0.0162113	0.0172955	0.0110782	-0.00278815	0.0241463	-0.0374432	0.0181106	0.0126072	0.0443135
-4.4232	-0.0817854	-0.00427991	0.154668	0.113786	0.0337762	-0.152426	-0.0121611	0.0652421	-0.0722823	-0.0094483	-0.0198538	0.00323477	-0.0405496	-0.0161995	0.0173199	0.0110732	-0.00278506	0.0241541	-0.0374276	0.0181153	0.0126017	0.0443096
-4.42272	-0.0817725	-0.0042444	0.154665	0.11376	0.0338193	-0.152481	-0.012142	0.0652514	-0.0722598	-0.00941447	-0.0198215	0.00323839	-0.0405411	-0.0161878	0.0173443	0.0110682	-0.00278197	0.0241619	-0.037412	0.01812	0.0125962	0.0443056
-4.42224	-0.0817596	-0.00420889	0.154663	0.113734	0.0338623	-0.152535	-0.0121229	0.0652607	-0.0722373	-0.00938072	-0.0197892	0.00324205	-0.0405326	-0.016176	0.0173687	0.0110631	-0.00277885	0.0241697	-0.0373965	0.0181247	0.0125906	0.0443017
-4.42176	-0.0817467	-0.00417338	0.15466	0.113709	0.0339054	-0.15259	-0.0121038	0.06527	-0.0722148	-0.0093469	-0.0197569	0.00324567	-0.0405242	-0.0161642	0.0173932	0.0110581	-0.00277574	0.0241776	-0.0373809	0.0181294	0.0125851	0.0442977
-4.42128	-0.0817337	-0.00413788	0.154657	0.113683	0.0339484	-0.152644	-0.0120847	0.0652793	-0.0721923	-0.00931315	-0.0197247	0.00324931	-0.0405157	-0.0161524	0.0174176	0.011053	-0.00277261	0.0241854	-0.0373653	0.0181342	0.0125795	0.0442937
-4.4208	-0.0817207	-0.00410238	0.154655	0.113657	0.0339915	-0.152699	-0.0120656	0.0652886	-0.0721698	-0.00927932	-0.0196924	0.00325292	-0.0405072	-0.0161407	0.017442	0.011048	-0.00276948	0.0241933	-0.0373498	0.018139	0.0125739	0.0442897
-4.42032	-0.0817077	-0.00406687	0.154652	0.113631	0.0340345	-0.152753	-0.0120464	0.0652979	-0.0721473	-0.00924557	-0.0196602	0.00325655	-0.0404987	-0.0161289	0.0174665	0.0110429	-0.00276633	0.0242011	-0.0373342	0.0181438	0.0125683	0.0442856
-4.41984	-0.0816946	-0.00403137	0.154649	0.113605	0.0340776	-0.152807	-0.0120273	0.0653072	-0.0721248	-0.00921176	-0.019628	0.00326015	-0.0404903	-0.0161171	0.0174909	0.0110378	-0.00276317	0.024209	-0.0373187	0.0181486	0.0125626	0.0442816
-4.41936	-0.0816814	-0.00399588	0.154646	0.113579	0.0341206	-0.152862	-0.0120081	0.0653165	-0.0721023	-0.009178	-0.0195958	0.00326379	-0.0404818	-0.0161053	0.0175154	0.0110328	-0.00276	0.0242168	-0.0373031	0.0181534	0.012557	0.0442775
-4.41888	-0.0816682	-0.00396039	0.154644	0.113552	0.0341637	-0.152916	-0.011989	0.0653258	-0.0720799	-0.00914419	-0.0195636	0.00326741	-0.0404733	-0.0160935	0.0175398	0.0110277	-0.00275683	0.0242247	-0.0372875	0.0181583	0.0125513	0.0442733
-4.4184	-0.0816549	-0.0039249	0.154641	0.113526	0.0342068	-0.15297	-0.0119698	0.0653351	-0.0720574	-0.00911044	-0.0195314	0.00327102	-0.0404648	-0.0160817	0.0175643	0.0110226	-0.00275365	0.0242326	-0.037272	0.0181631	0.0125456	0.0442692
-4.41792	-0.0816416	-0.00388941	0.154638	0.1135	0.0342498	-0.153025	-0.0119506	0.0653444	-0.0720349	-0.00907664	-0.0194993	0.00327461	-0.0404564	-0.0160698	0.0175887	0.0110175	-0.00275045	0.0242404	-0.0372564	0.018168	0.0125399	0.044265
-4.41744	-0.0816283	-0.00385392	0.154635	0.113474	0.0342929	-0.153079	-0.0119314	0.0653537	-0.0720124	-0.00904288	-0.0194671	0.00327821	-0.0404479	-0.016058	0.0176132	0.0110124	-0.00274725	0.0242483	-0.0372409	0.018173	0.0125342	0.0442608
-4.41696	-0.0816149	-0.00381843	0.154632	0.113448	0.034336	-0.153133	-0.0119122	0.065363	-0.07199	-0.00900907	-0.019435	0.00328177	-0.0404394	-0.0160461	0.0176377	0.0110073	-0.00274404	0.0242562	-0.0372253	0.0181779	0.0125285	0.0442566
-4.41648	-0.0816016	-0.00378295	0.154628	0.113421	0.0343791	-0.153187	-0.011893	0.0653723	-0.0719675	-0.00897533	-0.0194029	0.00328537	-0.040431	-0.0160342	0.0176621	0.0110022	-0.00274083	0.0242641	-0.0372098	0.0181828	0.0125227	0.0442524
-4.416	-0.0815883	-0.00374746	0.154625	0.113395	0.0344222	-0.153241	-0.0118738	0.0653816	-0.0719451	-0.00894154	-0.0193707	0.00328892	-0.0404225	-0.0160223	0.0176866	0.0109971	-0.0027376	0.024272	-0.0371943	0.0181878	0.012517	0.0442481
-4.41552	-0.0815749	-0.00371197	0.154622	0.113369	0.0344653	-0.153296	-0.0118546	0.0653909	-0.0719226	-0.00890778	-0.0193386	0.00329252	-0.0404141	-0.0160104	0.0177111	0.010992	-0.00273435	0.0242799	-0.0371787	0.0181928	0.0125112	0.0442438
-4.41504	-0.0815616	-0.00367647	0.154619	0.113342	0.0345083	-0.15335	-0.0118353	0.0654002	-0.0719002	-0.008874	-0.0193065	0.00329609	-0.0404056	-0.0159985	0.0177356	0.0109869	-0.0027311	0.0242878	-0.0371632	0.0181978	0.0125054	0.0442395
-4.41456	-0.0815483	-0.00364097	0.154615	0.113316	0.0345514	-0.153404	-0.0118161	0.0654095	-0.0718777	-0.00884025	-0.0192744	0.00329968	-0.0403971	-0.0159865	0.01776	0.0109818	-0.00272785	0.0242957	-0.0371476	0.0182029	0.0124996	0.0442352
-4.41408	-0.0815349	-0.00360547	0.154612	0.113289	0.0345945	-0.153458	-0.0117969	0.0654188	-0.0718553	-0.00880647	-0.0192423	0.00330325	-0.0403887	-0.0159745	0.0177845	0.0109766	-0.00272459	0.0243036	-0.0371321	0.0182079	0.0124937	0.0442308
-4.4136	-0.0815215	-0.00356998	0.154609	0.113263	0.0346376	-0.153512	-0.0117776	0.0654281	-0.0718329	-0.00877271	-0.0192102	0.00330685	-0.0403802	-0.0159625	0.017809	0.0109716	-0.00272132	0.0243115	-0.0371166	0.018213	0.0124879	0.0442264
-4.41312	-0.0815081	-0.00353449	0.154605	0.113236	0.0346807	-0.153566	-0.0117584	0.0654374	-0.0718105	-0.00873893	-0.0191781	0.00331041	-0.0403717	-0.0159505	0.0178335	0.0109665	-0.00271804	0.0243194	-0.0371011	0.0182182	0.012482	0.044222
-4.41264	-0.0814947	-0.003499	0.154602	0.11321	0.0347238	-0.15362	-0.0117391	0.0654467	-0.0717881	-0.00870517	-0.019146	0.00331398	-0.0403632	-0.0159384	0.017858	0.0109614	-0.00271475	0.0243273	-0.0370855	0.0182233	0.0124761	0.0442176
-4.41216	-0.0814812	-0.00346349	0.154598	0.113183	0.0347669	-0.153674	-0.0117199	0.065456	-0.0717657	-0.00867138	-0.019114	0.00331753	-0.0403548	-0.0159263	0.0178825	0.0109564	-0.00271145	0.0243353	-0.03707	0.0182285	0.0124702	0.0442131
-4.41168	-0.0814677	-0.00342802	0.154595	0.113156	0.03481	-0.153728	-0.0117007	0.0654653	-0.0717433	-0.00863765	-0.0190819	0.00332112	-0.0403463	-0.0159141	0.0179069	0.0109513	-0.00270815	0.0243432	-0.0370545	0.0182337	0.0124643	0.0442087
-4.4112	-0.0814542	-0.00339254	0.154591	0.11313	0.0348531	-0.153781	-0.0116814	0.0654746	-0.0717209	-0.00860387	-0.0190499	0.00332467	-0.0403378	-0.015902	0.0179315	0.0109462	-0.00270484	0.0243511	-0.037039	0.0182389	0.0124583	0.0442042
-4.41072	-0.0814406	-0.00335707	0.154587	0.113103	0.0348962	-0.153835	-0.0116622	0.0654839	-0.0716985	-0.00857015	-0.0190178	0.00332826	-0.0403293	-0.0158898	0.0179559	0.0109412	-0.00270151	0.0243591	-0.0370234	0.0182441	0.0124524	0.0441997
-4.41024	-0.0814271	-0.00332161	0.154584	0.113076	0.0349393	-0.153889	-0.0116429	0.0654932	-0.0716761	-0.00853638	-0.0189858	0.00333183	-0.0403208	-0.0158776	0.0179804	0.0109361	-0.00269818	0.024367	-0.0370079	0.0182494	0.0124464	0.0441952
-4.40976	-0.0814135	-0.00328614	0.15458	0.113049	0.0349824	-0.153943	-0.0116237	0.0655025	-0.0716537	-0.00850266	-0.0189538	0.00333544	-0.0403124	-0.0158653	0.0180049	0.0109311	-0.00269484	0.0243749	-0.0369924	0.0182547	0.0124404	0.0441906
-4.40928	-0.0813999	-0.00325069	0.154576	0.113022	0.0350255	-0.153996	-0.0116044	0.0655118	-0.0716313	-0.00846891	-0.0189218	0.00333902	-0.0403039	-0.015853	0.0180294	0.010926	-0.00269149	0.0243829	-0.0369769	0.01826	0.0124344	0.044186
-4.4088	-0.0813863	-0.00321522	0.154572	0.112996	0.0350686	-0.15405	-0.0115852	0.0655211	-0.071609	-0.00843519	-0.0188897	0.00334264	-0.0402954	-0.0158406	0.0180539	0.010921	-0.00268814	0.0243908	-0.0369614	0.0182653	0.0124283	0.0441815
-4.40832	-0.0813726	-0.00317976	0.154569	0.112969	0.0351118	-0.154104	-0.0115659	0.0655304	-0.0715866	-0.00840146	-0.0188577	0.00334624	-0.0402869	-0.0158283	0.0180785	0.0109159	-0.00268478	0.0243987	-0.0369459	0.0182706	0.0124223	0.0441768
-4.40784	-0.0813588	-0.00314431	0.154565	0.112942	0.0351549	-0.154157	-0.0115467	0.0655397	-0.0715642	-0.00836775	-0.0188257	0.00334985	-0.0402784	-0.0158159	0.018103	0.0109109	-0.00268141	0.0244067	-0.0369304	0.018276	0.0124162	0.0441722
-4.40736	-0.0813451	-0.00310886	0.154561	0.112915	0.035198	-0.154211	-0.0115274	0.065549	-0.0715419	-0.00833403	-0.0187937	0.00335346	-0.04027	-0.0158034	0.0181276	0.0109058	-0.00267803	0.0244146	-0.0369149	0.0182814	0.0124102	0.0441676
-4.40688	-0.0813313	-0.00307342	0.154557	0.112888	0.0352411	-0.154265	-0.0115081	0.0655583	-0.0715196	-0.00830033	-0.0187618	0.00335707	-0.0402615	-0.0157909	0.0181521	0.0109008	-0.00267464	0.0244225	-0.0368994	0.0182868	0.0124041	0.0441629
-4.4064	-0.0813174	-0.00303796	0.154553	0.112861	0.0352842	-0.154318	-0.0114888	0.0655676	-0.0714972	-0.00826662	-0.0187298	0.00336068	-0.040253	-0.0157784	0.0181767	0.0108957	-0.00267123	0.0244305	-0.036884	0.0182923	0.012398	0.0441582
-4.40592	-0.0813036	-0.00300251	0.154549	0.112834	0.0353273	-0.154372	-0.0114695	0.0655769	-0.0714749	-0.00823293	-0.0186978	0.00336431	-0.0402446	-0.0157658	0.0182012	0.0108907	-0.00266782	0.0244384	-0.0368685	0.0182977	0.0123918	0.0441535
-4.40544	-0.0812897	-0.00296708	0.154544	0.112806	0.0353704	-0.154425	-0.0114502	0.0655862	-0.0714526	-0.00819922	-0.0186659	0.00336791	-0.0402361	-0.0157532	0.0182258	0.0108857	-0.0026644	0.0244463	-0.036853	0.0183032	0.0123857	0.0441488
-4.40496	-0.0812758	-0.00293162	0.15454	0.112779	0.0354135	-0.154479	-0.0114308	0.0655955	-0.0714302	-0.00816553	-0.018634	0.00337154	-0.0402276	-0.0157406	0.0182504	0.0108807	-0.00266096	0.0244543	-0.0368375	0.0183087	0.0123795	0.044144
-4.40448	-0.0812618	-0.00289617	0.154536	0.112752	0.0354565	-0.154532	-0.0114115	0.0656048	-0.0714079	-0.00813183	-0.018602	0.00337515	-0.0402192	-0.0157279	0.018275	0.0108757	-0.00265751	0.0244622	-0.036822	0.0183142	0.0123734	0.0441393
-4.404	-0.081248	-0.00286073	0.154532	0.112725	0.0354996	-0.154586	-0.0113922	0.0656141	-0.0713856	-0.00809816	-0.0185701	0.00337879	-0.0402107	-0.0157152	0.0182996	0.0108707	-0.00265406	0.0244702	-0.0368066	0.0183198	0.0123672	0.0441345
-4.40352	-0.0812342	-0.0028253	0.154527	0.112698	0.0355427	-0.154639	-0.0113728	0.0656234	-0.0713633	-0.00806446	-0.0185381	0.00338242	-0.0402023	-0.0157025	0.0183242	0.0108657	-0.0026506	0.0244781	-0.0367911	0.0183254	0.012361	0.0441297
-4.40304	-0.0812203	-0.00278987	0.154523	0.11267	0.0355858	-0.154693	-0.0113535	0.0656326	-0.0713409	-0.00803078	-0.0185062	0.00338608	-0.0401938	-0.0156897	0.0183488	0.0108607	-0.00264712	0.024486	-0.0367757	0.018331	0.0123547	0.0441249
-4.40256	-0.0812065	-0.00275445	0.154519	0.112643	0.0356289	-0.154746	-0.0113341	0.065642	-0.0713186	-0.00799708	-0.0184743	0.00338974	-0.0401854	-0.0156769	0.0183734	0.0108557	-0.00264363	0.024494	-0.0367602	0.0183366	0.0123485	0.0441201
-4.40208	-0.0811927	-0.00271902	0.154514	0.112616	0.035672	-0.154799	-0.0113147	0.0656513	-0.0712963	-0.0079634	-0.0184424	0.00339341	-0.0401769	-0.015664	0.0183981	0.0108507	-0.00264013	0.0245019	-0.0367448	0.0183422	0.0123422	0.0441152
-4.4016	-0.0811788	-0.00268358	0.15451	0.112589	0.0357151	-0.154853	-0.0112953	0.0656606	-0.071274	-0.0079297	-0.0184105	0.0033971	-0.0401685	-0.0156511	0.0184227	0.0108458	-0.00263662	0.0245098	-0.0367293	0.0183479	0.012336	0.0441104
-4.40112	-0.0811649	-0.00264815	0.154505	0.112561	0.0357582	-0.154906	-0.011276	0.0656699	-0.0712518	-0.00789603	-0.0183786	0.00340079	-0.04016	-0.0156382	0.0184474	0.0108408	-0.0026331	0.0245178	-0.0367139	0.0183536	0.0123297	0.0441055
-4.40064	-0.0811509	-0.00261272	0.1545	0.112534	0.0358013	-0.154959	-0.0112566	0.0656792	-0.0712295	-0.00786233	-0.0183467	0.00340448	-0.0401516	-0.0156252	0.018472	0.0108359	-0.00262956	0.0245257	-0.0366984	0.0183593	0.0123234	0.0441006
-4.40016	-0.0811369	-0.00257727	0.154496	0.112506	0.0358443	-0.155012	-0.0112372	0.0656885	-0.0712072	-0.00782865	-0.0183149	0.00340819	-0.0401431	-0.0156122	0.0184967	0.0108309	-0.00262602	0.0245337	-0.036683	0.018365	0.0123171	0.0440957
-4.39968	-0.081123	-0.00254183	0.154491	0.112479	0.0358874	-0.155065	-0.0112178	0.0656978	-0.071185	-0.00779493	-0.018283	0.00341189	-0.0401347	-0.0155991	0.0185214	0.010826	-0.00262245	0.0245416	-0.0366675	0.0183707	0.0123108	0.0440908
-4.3992	-0.081109	-0.0025064	0.154486	0.112452	0.0359305	-0.155118	-0.0111984	0.0657071	-0.0711627	-0.00776126	-0.0182511	0.00341561	-0.0401263	-0.0155861	0.0185461	0.0108211	-0.00261889	0.0245495	-0.0366521	0.0183765	0.0123044	0.0440858
-4.39872	-0.081095	-0.00247094	0.154481	0.112424	0.0359736	-0.155171	-0.011179	0.0657165	-0.0711405	-0.00772756	-0.0182192	0.00341933	-0.0401178	-0.015573	0.0185708	0.0108162	-0.00261531	0.0245575	-0.0366367	0.0183822	0.0122981	0.0440809
-4.39824	-0.0810809	-0.0024355	0.154477	0.112397	0.0360166	-0.155225	-0.0111596	0.0657258	-0.0711182	-0.00769387	-0.0181874	0.00342309	-0.0401094	-0.0155598	0.0185956	0.0108113	-0.00261172	0.0245655	-0.0366212	0.018388	0.0122917	0.0440759
-4.39776	-0.0810668	-0.00240004	0.154472	0.112369	0.0360597	-0.155278	-0.0111402	0.0657351	-0.071096	-0.00766016	-0.0181555	0.00342682	-0.0401009	-0.0155467	0.0186203	0.0108064	-0.00260812	0.0245734	-0.0366058	0.0183938	0.0122853	0.0440709
-4.39728	-0.0810527	-0.00236458	0.154467	0.112341	0.0361028	-0.155331	-0.0111208	0.0657444	-0.0710738	-0.00762647	-0.0181237	0.00343057	-0.0400925	-0.0155335	0.018645	0.0108015	-0.0026045	0.0245814	-0.0365904	0.0183996	0.0122789	0.0440659
-4.3968	-0.0810386	-0.00232911	0.154462	0.112314	0.0361458	-0.155383	-0.0111013	0.0657537	-0.0710516	-0.00759277	-0.0180918	0.00343431	-0.0400841	-0.0155202	0.0186698	0.0107967	-0.00260088	0.0245894	-0.036575	0.0184055	0.0122725	0.0440609
-4.39632	-0.0810246	-0.00229364	0.154457	0.112286	0.0361889	-0.155436	-0.0110819	0.065763	-0.0710294	-0.00755906	-0.01806	0.00343808	-0.0400757	-0.0155069	0.0186946	0.0107918	-0.00259725	0.0245973	-0.0365595	0.0184113	0.0122661	0.0440559
-4.39584	-0.0810105	-0.00225815	0.154452	0.112259	0.0362319	-0.155489	-0.0110625	0.0657724	-0.0710072	-0.00752536	-0.0180281	0.00344185	-0.0400672	-0.0154936	0.0187194	0.0107869	-0.0025936	0.0246053	-0.0365441	0.0184172	0.0122596	0.0440508
-4.39536	-0.0809965	-0.00222267	0.154446	0.112231	0.036275	-0.155542	-0.0110431	0.0657817	-0.070985	-0.00749164	-0.0179963	0.00344565	-0.0400588	-0.0154802	0.0187442	0.0107821	-0.00258996	0.0246133	-0.0365287	0.018423	0.0122531	0.0440458
-4.39488	-0.0809826	-0.00218717	0.154441	0.112203	0.036318	-0.155595	-0.0110237	0.065791	-0.0709628	-0.00745796	-0.0179645	0.00344941	-0.0400503	-0.0154668	0.018769	0.0107773	-0.00258629	0.0246213	-0.0365132	0.0184289	0.0122467	0.0440407
-4.3944	-0.0809686	-0.00215167	0.154436	0.112175	0.0363611	-0.155647	-0.0110043	0.0658003	-0.0709407	-0.00742425	-0.0179326	0.00345323	-0.0400419	-0.0154534	0.0187938	0.0107724	-0.0025826	0.0246293	-0.0364978	0.0184348	0.0122401	0.0440356
-4.39392	-0.0809546	-0.00211614	0.154431	0.112148	0.0364041	-0.1557	-0.0109849	0.0658096	-0.0709185	-0.00739055	-0.0179008	0.00345705	-0.0400335	-0.0154399	0.0188187	0.0107676	-0.00257891	0.0246373	-0.0364823	0.0184407	0.0122336	0.0440305
-4.39344	-0.0809405	-0.00208062	0.154425	0.11212	0.0364471	-0.155753	-0.0109655	0.0658189	-0.0708964	-0.00735684	-0.017869	0.00346088	-0.040025	-0.0154264	0.0188436	0.0107628	-0.00257521	0.0246453	-0.0364669	0.0184467	0.0122271	0.0440254
-4.39296	-0.0809265	-0.00204507	0.15442	0.112092	0.0364901	-0.155806	-0.0109461	0.0658283	-0.0708742	-0.00732314	-0.0178372	0.00346471	-0.0400166	-0.0154128	0.0188684	0.010758	-0.00257148	0.0246533	-0.0364515	0.0184526	0.0122206	0.0440203
-4.39248	-0.0809124	-0.00200953	0.154415	0.112064	0.0365332	-0.155858	-0.0109267	0.0658376	-0.0708521	-0.00728944	-0.0178054	0.00346858	-0.0400082	-0.0153992	0.0188933	0.0107532	-0.00256775	0.0246613	-0.036436	0.0184585	0.0122141	0.0440152
-4.392	-0.0808983	-0.00197397	0.154409	0.112036	0.0365762	-0.155911	-0.0109073	0.0658469	-0.0708299	-0.00725572	-0.0177737	0.00347249	-0.0399997	-0.0153855	0.0189182	0.0107484	-0.002564	0.0246693	-0.0364206	0.0184645	0.0122075	0.04401
-4.39152	-0.0808843	-0.00193839	0.154404	0.112009	0.0366192	-0.155963	-0.010888	0.0658562	-0.0708078	-0.00722203	-0.0177419	0.00347642	-0.0399913	-0.0153719	0.0189431	0.0107436	-0.00256023	0.0246773	-0.0364051	0.0184704	0.0122009	0.0440049
-4.39104	-0.0808703	-0.00190282	0.154398	0.111981	0.0366622	-0.156016	-0.0108686	0.0658656	-0.0707857	-0.00718834	-0.0177101	0.00348036	-0.0399829	-0.0153581	0.018968	0.0107389	-0.00255645	0.0246853	-0.0363897	0.0184764	0.0121943	0.0439997
-4.39056	-0.0808562	-0.00186723	0.154393	0.111953	0.0367052	-0.156068	-0.0108492	0.0658749	-0.0707636	-0.00715463	-0.0176783	0.00348435	-0.0399745	-0.0153444	0.0189929	0.0107341	-0.00255266	0.0246933	-0.0363742	0.0184824	0.0121877	0.0439945
-4.39008	-0.0808421	-0.00183164	0.154387	0.111925	0.0367482	-0.156121	-0.0108299	0.0658842	-0.0707415	-0.00712095	-0.0176466	0.00348836	-0.039966	-0.0153305	0.0190179	0.0107293	-0.00254885	0.0247014	-0.0363588	0.0184884	0.0121811	0.0439893
-4.3896	-0.0808279	-0.00179604	0.154381	0.111897	0.0367912	-0.156173	-0.0108106	0.0658936	-0.0707194	-0.00708726	-0.0176148	0.00349239	-0.0399576	-0.0153167	0.0190428	0.0107246	-0.00254503	0.0247094	-0.0363434	0.0184944	0.0121744	0.043984
-4.38912	-0.0808138	-0.00176043	0.154375	0.111869	0.0368342	-0.156226	-0.0107912	0.0659029	-0.0706973	-0.00705358	-0.0175831	0.00349645	-0.0399491	-0.0153028	0.0190677	0.0107198	-0.0025412	0.0247174	-0.0363279	0.0185004	0.0121678	0.0439788
-4.38864	-0.0807996	-0.00172484	0.15437	0.111841	0.0368772	-0.156278	-0.0107719	0.0659122	-0.0706752	-0.0070199	-0.0175513	0.00350053	-0.0399407	-0.0152888	0.0190927	0.0107151	-0.00253734	0.0247254	-0.0363125	0.0185065	0.0121611	0.0439735
-4.38816	-0.0807855	-0.00168924	0.154364	0.111813	0.0369202	-0.15633	-0.0107526	0.0659216	-0.0706531	-0.00698624	-0.0175196	0.00350461	-0.0399322	-0.0152748	0.0191177	0.0107103	-0.00253347	0.0247335	-0.0362971	0.0185125	0.0121544	0.0439683
-4.38768	-0.0807713	-0.00165363	0.154358	0.111784	0.0369631	-0.156383	-0.0107332	0.0659309	-0.070631	-0.00695256	-0.0174878	0.00350874	-0.0399238	-0.0152608	0.0191426	0.0107055	-0.00252959	0.0247415	-0.0362817	0.0185186	0.0121477	0.043963
-4.3872	-0.0807571	-0.00161801	0.154352	0.111756	0.0370061	-0.156435	-0.0107139	0.0659402	-0.070609	-0.0069189	-0.0174561	0.00351285	-0.0399154	-0.0152468	0.0191676	0.0107008	-0.0025257	0.0247495	-0.0362663	0.0185246	0.012141	0.0439577
-4.38672	-0.0807428	-0.0015824	0.154346	0.111728	0.0370491	-0.156487	-0.0106946	0.0659496	-0.0705869	-0.00688527	-0.0174243	0.00351703	-0.0399069	-0.0152327	0.0191926	0.010696	-0.00252179	0.0247576	-0.0362509	0.0185307	0.0121343	0.0439524
-4.38624	-0.0807286	-0.00154676	0.15434	0.1117	0.037092	-0.156539	-0.0106752	0.0659589	-0.0705648	-0.00685161	-0.0173926	0.00352118	-0.0398985	-0.0152185	0.0192176	0.0106913	-0.00251787	0.0247656	-0.0362355	0.0185368	0.0121275	0.0439471
-4.38576	-0.0807143	-0.00151115	0.154334	0.111672	0.037135	-0.156592	-0.0106559	0.0659682	-0.0705428	-0.00681798	-0.0173609	0.00352539	-0.03989	-0.0152044	0.0192426	0.0106865	-0.00251395	0.0247737	-0.0362201	0.0185429	0.0121208	0.0439417
-4.38528	-0.0807	-0.00147553	0.154327	0.111644	0.0371779	-0.156644	-0.0106366	0.0659776	-0.0705207	-0.00678433	-0.0173292	0.00352958	-0.0398816	-0.0151901	0.0192676	0.0106817	-0.00251001	0.0247817	-0.0362047	0.018549	0.012114	0.0439364
-4.3848	-0.0806858	-0.00143992	0.154321	0.111616	0.0372209	-0.156696	-0.0106173	0.0659869	-0.0704987	-0.00675069	-0.0172974	0.00353382	-0.0398731	-0.0151759	0.0192926	0.010677	-0.00250606	0.0247898	-0.0361893	0.0185551	0.0121072	0.043931
-4.38432	-0.0806716	-0.00140427	0.154315	0.111587	0.0372638	-0.156748	-0.010598	0.0659963	-0.0704767	-0.00671705	-0.0172657	0.00353803	-0.0398647	-0.0151616	0.0193177	0.0106722	-0.00250209	0.0247979	-0.0361739	0.0185612	0.0121004	0.0439256
-4.38384	-0.0806573	-0.00136863	0.154309	0.111559	0.0373068	-0.1568	-0.0105788	0.0660056	-0.0704547	-0.00668341	-0.017234	0.00354229	-0.0398562	-0.0151473	0.0193427	0.0106674	-0.00249813	0.0248059	-0.0361585	0.0185674	0.0120936	0.0439202
-4.38336	-0.080643	-0.00133297	0.154302	0.111531	0.0373497	-0.156852	-0.0105595	0.066015	-0.0704327	-0.00664977	-0.0172023	0.00354653	-0.0398478	-0.0151329	0.0193677	0.0106626	-0.00249415	0.024814	-0.0361431	0.0185735	0.0120868	0.0439148
-4.38288	-0.0806287	-0.00129732	0.154296	0.111502	0.0373926	-0.156904	-0.0105403	0.0660243	-0.0704107	-0.00661613	-0.0171706	0.00355082	-0.0398393	-0.0151185	0.0193928	0.0106579	-0.00249016	0.0248221	-0.0361277	0.0185796	0.0120799	0.0439094
-4.3824	-0.0806144	-0.00126164	0.154289	0.111474	0.0374356	-0.156955	-0.0105211	0.0660337	-0.0703888	-0.00658247	-0.0171389	0.00355507	-0.0398309	-0.015104	0.0194179	0.0106531	-0.00248615	0.0248301	-0.0361123	0.0185858	0.0120731	0.043904
-4.38192	-0.0806002	-0.00122596	0.154283	0.111445	0.0374785	-0.157007	-0.0105018	0.066043	-0.0703668	-0.00654886	-0.0171072	0.00355937	-0.0398224	-0.0150895	0.0194429	0.0106483	-0.00248214	0.0248382	-0.036097	0.018592	0.0120662	0.0438986
-4.38144	-0.080586	-0.00119027	0.154276	0.111417	0.0375214	-0.157059	-0.0104826	0.0660524	-0.0703449	-0.00651521	-0.0170755	0.00356364	-0.039814	-0.015075	0.019468	0.0106435	-0.00247812	0.0248463	-0.0360816	0.0185981	0.0120594	0.0438931
-4.38096	-0.0805717	-0.00115459	0.154269	0.111388	0.0375643	-0.157111	-0.0104634	0.0660617	-0.070323	-0.00648158	-0.0170437	0.00356794	-0.0398055	-0.0150604	0.0194932	0.0106387	-0.00247409	0.0248544	-0.0360662	0.0186043	0.0120525	0.0438876
-4.38048	-0.0805574	-0.00111888	0.154262	0.11136	0.0376072	-0.157163	-0.0104442	0.0660711	-0.0703011	-0.00644793	-0.017012	0.00357223	-0.0397971	-0.0150458	0.0195183	0.0106339	-0.00247005	0.0248625	-0.0360509	0.0186105	0.0120455	0.0438822
-4.38	-0.0805431	-0.00108316	0.154256	0.111331	0.0376501	-0.157215	-0.010425	0.0660804	-0.0702792	-0.0064143	-0.0169803	0.00357653	-0.0397886	-0.0150312	0.0195434	0.0106291	-0.002466	0.0248706	-0.0360355	0.0186167	0.0120386	0.0438767
-4.37952	-0.0805288	-0.00104743	0.154249	0.111303	0.037693	-0.157266	-0.0104059	0.0660898	-0.0702574	-0.00638066	-0.0169485	0.00358082	-0.0397801	-0.0150165	0.0195685	0.0106243	-0.00246194	0.0248787	-0.0360201	0.0186229	0.0120317	0.0438712
-4.37904	-0.0805144	-0.00101171	0.154242	0.111274	0.0377359	-0.157318	-0.0103867	0.0660992	-0.0702355	-0.00634704	-0.0169168	0.00358514	-0.0397717	-0.0150018	0.0195937	0.0106195	-0.00245786	0.0248868	-0.0360048	0.018629	0.0120247	0.0438657
-4.37856	-0.0805	-0.000975966	0.154235	0.111246	0.0377788	-0.15737	-0.0103675	0.0661085	-0.0702137	-0.00631341	-0.0168851	0.00358942	-0.0397632	-0.014987	0.0196188	0.0106147	-0.00245379	0.0248949	-0.0359894	0.0186352	0.0120178	0.0438601
-4.37808	-0.0804856	-0.000940211	0.154228	0.111217	0.0378217	-0.157421	-0.0103484	0.0661179	-0.0701918	-0.00627977	-0.0168534	0.00359375	-0.0397547	-0.0149723	0.019644	0.01061	-0.0024497	0.024903	-0.035974	0.0186415	0.0120108	0.0438546
-4.3776	-0.0804711	-0.000904459	0.154221	0.111188	0.0378645	-0.157473	-0.0103292	0.0661272	-0.07017	-0.00624613	-0.0168217	0.00359805	-0.0397463	-0.0149574	0.0196692	0.0106052	-0.0024456	0.0249111	-0.0359587	0.0186477	0.0120038	0.043849
-4.37712	-0.0804566	-0.000868686	0.154214	0.11116	0.0379074	-0.157525	-0.01031	0.0661366	-0.0701482	-0.00621251	-0.0167899	0.0036024	-0.0397378	-0.0149426	0.0196944	0.0106004	-0.0024415	0.0249193	-0.0359433	0.0186539	0.0119968	0.0438435
-4.37664	-0.0804421	-0.000832914	0.154206	0.111131	0.0379502	-0.157576	-0.0102909	0.066146	-0.0701264	-0.00617886	-0.0167582	0.00360671	-0.0397293	-0.0149277	0.0197196	0.0105956	-0.00243739	0.0249274	-0.035928	0.0186601	0.0119898	0.0438379
-4.37616	-0.0804275	-0.000797123	0.154199	0.111102	0.0379931	-0.157628	-0.0102718	0.0661553	-0.0701046	-0.00614524	-0.0167265	0.00361109	-0.0397208	-0.0149127	0.0197448	0.0105908	-0.00243327	0.0249355	-0.0359126	0.0186664	0.0119827	0.0438323
-4.37568	-0.080413	-0.000761326	0.154192	0.111073	0.0380359	-0.157679	-0.0102526	0.0661647	-0.0700829	-0.00611157	-0.0166948	0.00361543	-0.0397124	-0.0148978	0.01977	0.010586	-0.00242914	0.0249436	-0.0358972	0.0186726	0.0119757	0.0438267
-4.3752	-0.0803983	-0.000725517	0.154185	0.111045	0.0380787	-0.157731	-0.0102335	0.066174	-0.0700611	-0.00607795	-0.0166631	0.00361981	-0.0397039	-0.0148828	0.0197953	0.0105813	-0.002425	0.0249517	-0.0358819	0.0186789	0.0119686	0.0438211
-4.37472	-0.0803837	-0.00068971	0.154177	0.111016	0.0381215	-0.157782	-0.0102144	0.0661834	-0.0700393	-0.0060443	-0.0166314	0.00362417	-0.0396954	-0.0148677	0.0198205	0.0105765	-0.00242086	0.0249599	-0.0358665	0.0186852	0.0119615	0.0438155
-4.37424	-0.080369	-0.000653888	0.15417	0.110987	0.0381643	-0.157834	-0.0101953	0.0661928	-0.0700176	-0.00601066	-0.0165998	0.00362856	-0.039687	-0.0148526	0.0198458	0.0105717	-0.0024167	0.024968	-0.0358512	0.0186915	0.0119544	0.0438099
-4.37376	-0.0803544	-0.000618055	0.154162	0.110958	0.0382071	-0.157885	-0.0101761	0.0662021	-0.0699959	-0.00597701	-0.0165681	0.00363293	-0.0396785	-0.0148375	0.019871	0.0105669	-0.00241254	0.0249761	-0.0358358	0.0186978	0.0119473	0.0438043
-4.37328	-0.0803398	-0.000582221	0.154155	0.110929	0.0382499	-0.157937	-0.010157	0.0662115	-0.0699742	-0.00594337	-0.0165364	0.00363735	-0.03967	-0.0148224	0.0198963	0.0105621	-0.00240837	0.0249842	-0.0358205	0.0187041	0.0119402	0.0437986
-4.3728	-0.0803252	-0.000546373	0.154147	0.110901	0.0382927	-0.157988	-0.0101379	0.0662208	-0.0699525	-0.00590971	-0.0165048	0.00364175	-0.0396616	-0.0148072	0.0199216	0.0105573	-0.00240419	0.0249923	-0.0358051	0.0187104	0.0119331	0.043793
-4.37232	-0.0803105	-0.000510508	0.154139	0.110872	0.0383354	-0.15804	-0.0101188	0.0662302	-0.0699308	-0.00587608	-0.0164731	0.00364618	-0.0396531	-0.0147919	0.0199469	0.0105525	-0.0024	0.0250005	-0.0357898	0.0187167	0.0119259	0.0437873
-4.37184	-0.0802958	-0.000474651	0.154132	0.110843	0.0383782	-0.158091	-0.0100997	0.0662396	-0.0699091	-0.00584242	-0.0164415	0.0036506	-0.0396446	-0.0147767	0.0199722	0.0105477	-0.0023958	0.0250086	-0.0357745	0.018723	0.0119187	0.0437816
-4.37136	-0.0802812	-0.000438788	0.154124	0.110814	0.038421	-0.158143	-0.0100806	0.066249	-0.0698875	-0.00580879	-0.0164098	0.00365506	-0.0396361	-0.0147613	0.0199976	0.0105429	-0.00239159	0.0250167	-0.0357592	0.0187294	0.0119115	0.043776
-4.37088	-0.0802666	-0.00040292	0.154116	0.110785	0.0384637	-0.158194	-0.0100615	0.0662583	-0.0698658	-0.00577513	-0.0163782	0.0036595	-0.0396276	-0.014746	0.0200229	0.0105381	-0.00238738	0.0250248	-0.0357439	0.0187357	0.0119043	0.0437703
-4.3704	-0.0802519	-0.000367029	0.154108	0.110756	0.0385064	-0.158245	-0.0100425	0.0662677	-0.0698442	-0.00574149	-0.0163466	0.00366399	-0.0396192	-0.0147306	0.0200482	0.0105333	-0.00238316	0.025033	-0.0357286	0.0187421	0.0118971	0.0437646
-4.36992	-0.0802374	-0.000331133	0.1541	0.110727	0.0385491	-0.158296	-0.0100234	0.0662771	-0.0698225	-0.00570782	-0.016315	0.00366845	-0.0396107	-0.0147151	0.0200736	0.0105285	-0.00237894	0.0250411	-0.0357133	0.0187485	0.0118899	0.0437589
-4.36944	-0.0802227	-0.000295213	0.154092	0.110698	0.0385919	-0.158348	-0.0100044	0.0662865	-0.0698009	-0.0056742	-0.0162834	0.00367293	-0.0396022	-0.0146996	0.0200989	0.0105237	-0.0023747	0.0250493	-0.035698	0.0187549	0.0118826	0.0437531
-4.36896	-0.0802081	-0.000259277	0.154084	0.110669	0.0386346	-0.158399	-0.00998537	0.0662958	-0.0697793	-0.00564053	-0.0162519	0.00367742	-0.0395937	-0.0146841	0.0201243	0.010519	-0.00237046	0.0250574	-0.0356827	0.0187613	0.0118753	0.0437474
-4.36848	-0.0801935	-0.000223341	0.154076	0.11064	0.0386773	-0.15845	-0.00996636	0.0663052	-0.0697577	-0.00560688	-0.0162203	0.00368194	-0.0395852	-0.0146685	0.0201497	0.0105142	-0.0023662	0.0250656	-0.0356674	0.0187677	0.0118681	0.0437416
-4.368	-0.0801788	-0.000187369	0.154068	0.110612	0.0387199	-0.158501	-0.00994736	0.0663146	-0.069736	-0.00557323	-0.0161887	0.00368645	-0.0395767	-0.0146529	0.0201751	0.0105094	-0.00236196	0.0250737	-0.0356521	0.0187741	0.0118608	0.0437359
-4.36752	-0.0801641	-0.000151397	0.154059	0.110583	0.0387626	-0.158552	-0.00992838	0.066324	-0.0697145	-0.00553958	-0.0161572	0.00369098	-0.0395682	-0.0146372	0.0202005	0.0105046	-0.00235769	0.0250819	-0.0356369	0.0187806	0.0118534	0.0437301
-4.36704	-0.0801495	-0.000115401	0.154051	0.110554	0.0388053	-0.158603	-0.00990941	0.0663334	-0.0696929	-0.00550593	-0.0161256	0.0036955	-0.0395598	-0.0146215	0.0202259	0.0104998	-0.00235341	0.02509	-0.0356216	0.018787	0.0118461	0.0437243
-4.36656	-0.0801348	-7.94144e-05	0.154043	0.110525	0.0388479	-0.158654	-0.00989044	0.0663428	-0.0696713	-0.00547229	-0.0160941	0.00370006	-0.0395513	-0.0146058	0.0202513	0.0104951	-0.00234914	0.0250982	-0.0356064	0.0187935	0.0118387	0.0437185
-4.36608	-0.0801201	-4.33997e-05	0.154034	0.110496	0.0388906	-0.158706	-0.00987148	0.0663521	-0.0696497	-0.00543865	-0.0160626	0.00370463	-0.0395428	-0.01459	0.0202767	0.0104903	-0.00234486	0.0251063	-0.0355911	0.0188	0.0118314	0.0437127
-4.3656	-0.0801054	-7.38584e-06	0.154026	0.110467	0.0389332	-0.158757	-0.00985256	0.0663615	-0.0696282	-0.00540501	-0.0160311	0.00370922	-0.0395343	-0.0145742	0.0203021	0.0104855	-0.00234056	0.0251145	-0.0355759	0.0188065	0.011824	0.0437069
-4.36512	-0.0800906	2.86538e-05	0.154017	0.110438	0.0389758	-0.158808	-0.00983364	0.0663709	-0.0696067	-0.00537137	-0.0159996	0.0037138	-0.0395258	-0.0145583	0.0203275	0.0104808	-0.00233626	0.0251227	-0.0355607	0.018813	0.0118166	0.043701
-4.36464	-0.0800758	6.46973e-05	0.154009	0.110409	0.0390185	-0.158858	-0.00981473	0.0663803	-0.0695852	-0.00533774	-0.0159681	0.00371843	-0.0395174	-0.0145425	0.0203529	0.010476	-0.00233195	0.0251308	-0.0355454	0.0188195	0.0118091	0.0436952
-4.36416	-0.080061	0.000100759	0.154	0.11038	0.039061	-0.158909	-0.00979585	0.0663897	-0.0695636	-0.00530411	-0.0159366	0.00372307	-0.0395089	-0.0145266	0.0203784	0.0104713	-0.00232763	0.025139	-0.0355302	0.0188261	0.0118017	0.0436893
-4.36368	-0.0800461	0.000136823	0.153992	0.110352	0.0391036	-0.15896	-0.00977699	0.0663991	-0.0695422	-0.00527047	-0.0159051	0.00372777	-0.0395004	-0.0145106	0.0204038	0.0104665	-0.00232332	0.0251472	-0.035515	0.0188326	0.0117942	0.0436835
-4.3632	-0.0800312	0.000172907	0.153983	0.110323	0.0391462	-0.159011	-0.00975814	0.0664085	-0.0695207	-0.00523684	-0.0158736	0.00373247	-0.0394919	-0.0144946	0.0204293	0.0104617	-0.00231898	0.0251553	-0.0354998	0.0188392	0.0117868	0.0436776
-4.36272	-0.0800163	0.000208993	0.153974	0.110294	0.0391888	-0.159062	-0.00973929	0.0664179	-0.0694992	-0.00520321	-0.0158422	0.00373721	-0.0394835	-0.0144786	0.0204548	0.010457	-0.00231465	0.0251635	-0.0354846	0.0188458	0.0117793	0.0436717
-4.36224	-0.0800013	0.000245103	0.153965	0.110265	0.0392314	-0.159113	-0.00972047	0.0664273	-0.0694778	-0.00516959	-0.0158107	0.00374197	-0.039475	-0.0144626	0.0204803	0.0104522	-0.0023103	0.0251717	-0.0354694	0.0188524	0.0117718	0.0436658
-4.36176	-0.0799863	0.000281212	0.153957	0.110236	0.0392739	-0.159163	-0.00970166	0.0664367	-0.0694563	-0.00513597	-0.0157793	0.00374677	-0.0394665	-0.0144465	0.0205058	0.0104475	-0.00230595	0.0251799	-0.0354542	0.018859	0.0117642	0.0436599
-4.36128	-0.0799713	0.000317341	0.153948	0.110207	0.0393165	-0.159214	-0.00968289	0.0664461	-0.0694349	-0.00510235	-0.0157478	0.0037516	-0.0394581	-0.0144304	0.0205313	0.0104427	-0.00230159	0.025188	-0.035439	0.0188656	0.0117567	0.0436539
-4.3608	-0.0799563	0.000353482	0.153939	0.110178	0.039359	-0.159265	-0.00966413	0.0664555	-0.0694134	-0.00506874	-0.0157164	0.00375645	-0.0394496	-0.0144143	0.0205568	0.010438	-0.00229723	0.0251962	-0.0354238	0.0188722	0.0117491	0.043648
-4.36032	-0.0799412	0.000389629	0.15393	0.11015	0.0394015	-0.159315	-0.00964539	0.0664649	-0.069392	-0.00503512	-0.0156849	0.00376133	-0.0394412	-0.0143982	0.0205824	0.0104332	-0.00229286	0.0252044	-0.0354086	0.0188788	0.0117415	0.0436421
-4.35984	-0.0799261	0.000425786	0.153921	0.110121	0.039444	-0.159366	-0.00962665	0.0664743	-0.0693706	-0.00500151	-0.0156535	0.00376626	-0.0394327	-0.014382	0.0206079	0.0104285	-0.00228849	0.0252126	-0.0353934	0.0188855	0.011734	0.0436361
-4.35936	-0.0799109	0.000461955	0.153912	0.110092	0.0394865	-0.159416	-0.00960796	0.0664838	-0.0693492	-0.0049679	-0.0156221	0.00377119	-0.0394243	-0.0143658	0.0206335	0.0104237	-0.0022841	0.0252208	-0.0353782	0.0188921	0.0117264	0.0436301
-4.35888	-0.0798958	0.000498145	0.153902	0.110063	0.039529	-0.159467	-0.00958927	0.0664932	-0.0693278	-0.00493429	-0.0155907	0.00377618	-0.0394158	-0.0143495	0.0206591	0.0104189	-0.00227972	0.025229	-0.035363	0.0188988	0.0117187	0.0436242
-4.3584	-0.0798806	0.000534335	0.153893	0.110034	0.0395715	-0.159517	-0.00957059	0.0665026	-0.0693065	-0.00490067	-0.0155593	0.00378115	-0.0394074	-0.0143332	0.0206846	0.0104142	-0.00227532	0.0252373	-0.0353478	0.0189055	0.0117111	0.0436182
-4.35792	-0.0798654	0.000570533	0.153884	0.110005	0.0396139	-0.159568	-0.00955194	0.066512	-0.0692851	-0.00486708	-0.0155279	0.00378618	-0.0393989	-0.0143169	0.0207103	0.0104094	-0.00227092	0.0252455	-0.0353326	0.0189122	0.0117034	0.0436122
-4.35744	-0.0798502	0.000606739	0.153875	0.109976	0.0396564	-0.159618	-0.00953332	0.0665215	-0.0692637	-0.00483347	-0.0154965	0.00379123	-0.0393905	-0.0143006	0.0207359	0.0104047	-0.00226651	0.0252537	-0.0353174	0.0189189	0.0116958	0.0436062
-4.35696	-0.079835	0.000642958	0.153865	0.109947	0.0396988	-0.159669	-0.00951471	0.0665309	-0.0692424	-0.00479987	-0.0154652	0.0037963	-0.039382	-0.0142843	0.0207615	0.0103999	-0.00226209	0.025262	-0.0353022	0.0189256	0.0116881	0.0436002
-4.35648	-0.0798198	0.000679174	0.153856	0.109918	0.0397412	-0.159719	-0.00949611	0.0665403	-0.069221	-0.00476626	-0.0154339	0.00380139	-0.0393736	-0.0142679	0.0207871	0.0103951	-0.00225767	0.0252702	-0.035287	0.0189323	0.0116804	0.0435942
-4.356	-0.0798045	0.000715385	0.153846	0.109889	0.0397836	-0.15977	-0.00947753	0.0665497	-0.0691996	-0.00473267	-0.0154025	0.00380655	-0.0393652	-0.0142515	0.0208128	0.0103903	-0.00225324	0.0252785	-0.0352718	0.018939	0.0116727	0.0435882
-4.35552	-0.0797892	0.000751624	0.153837	0.109861	0.039826	-0.15982	-0.00945898	0.0665592	-0.0691783	-0.00469906	-0.0153712	0.00381171	-0.0393568	-0.014235	0.0208384	0.0103856	-0.0022488	0.0252867	-0.0352566	0.0189457	0.011665	0.0435821
-4.35504	-0.0797738	0.000787861	0.153827	0.109832	0.0398684	-0.15987	-0.00944045	0.0665686	-0.0691569	-0.00466547	-0.0153399	0.00381693	-0.0393483	-0.0142185	0.0208641	0.0103808	-0.00224436	0.025295	-0.0352415	0.0189525	0.0116572	0.0435761
-4.35456	-0.0797585	0.00082409	0.153818	0.109803	0.0399108	-0.159921	-0.00942193	0.066578	-0.0691356	-0.00463186	-0.0153086	0.00382216	-0.03934	-0.014202	0.0208898	0.010376	-0.00223992	0.0253033	-0.0352263	0.0189592	0.0116495	0.0435701
-4.35408	-0.0797431	0.000860348	0.153808	0.109774	0.0399531	-0.159971	-0.00940346	0.0665874	-0.0691142	-0.00459827	-0.0152773	0.00382745	-0.0393316	-0.0141855	0.0209155	0.0103713	-0.00223545	0.0253116	-0.0352111	0.018966	0.0116417	0.043564
-4.3536	-0.0797277	0.00089661	0.153798	0.109745	0.0399954	-0.160021	-0.00938496	0.0665969	-0.0690929	-0.00456466	-0.015246	0.00383274	-0.0393232	-0.0141689	0.0209413	0.0103665	-0.00223099	0.0253199	-0.0351959	0.0189727	0.0116339	0.043558
-4.35312	-0.0797122	0.000932881	0.153788	0.109716	0.0400378	-0.160072	-0.00936654	0.0666063	-0.0690716	-0.00453108	-0.0152148	0.00383811	-0.0393148	-0.0141523	0.020967	0.0103618	-0.00222652	0.0253281	-0.0351807	0.0189795	0.0116261	0.0435519
-4.35264	-0.0796967	0.000969165	0.153778	0.109687	0.0400801	-0.160122	-0.00934811	0.0666157	-0.0690503	-0.00449748	-0.0151835	0.00384348	-0.0393064	-0.0141356	0.0209927	0.010357	-0.00222205	0.0253365	-0.0351656	0.0189863	0.0116183	0.0435458
-4.35216	-0.0796812	0.00100547	0.153768	0.109658	0.0401224	-0.160172	-0.00932973	0.0666251	-0.069029	-0.00446391	-0.0151523	0.00384891	-0.0392981	-0.014119	0.0210185	0.0103522	-0.00221758	0.0253448	-0.0351504	0.0189931	0.0116105	0.0435397
-4.35168	-0.0796657	0.0010418	0.153758	0.109629	0.0401646	-0.160222	-0.00931134	0.0666346	-0.0690077	-0.00443031	-0.015121	0.00385433	-0.0392897	-0.0141023	0.0210443	0.0103475	-0.00221309	0.0253531	-0.0351353	0.0189999	0.0116027	0.0435337
-4.3512	-0.0796502	0.00107814	0.153748	0.1096	0.0402069	-0.160273	-0.00929299	0.066644	-0.0689864	-0.00439674	-0.0150899	0.00385983	-0.0392814	-0.0140855	0.02107	0.0103427	-0.0022086	0.0253614	-0.0351202	0.0190067	0.0115948	0.0435276
-4.35072	-0.0796346	0.00111449	0.153738	0.109571	0.0402492	-0.160323	-0.00927463	0.0666534	-0.0689651	-0.00436315	-0.0150587	0.00386533	-0.039273	-0.0140687	0.0210958	0.0103379	-0.00220411	0.0253697	-0.035105	0.0190135	0.0115869	0.0435214
-4.35024	-0.079619	0.00115085	0.153728	0.109542	0.0402914	-0.160373	-0.00925632	0.0666628	-0.0689439	-0.0043296	-0.0150275	0.0038709	-0.0392647	-0.0140519	0.0211216	0.0103332	-0.00219961	0.0253781	-0.0350899	0.0190204	0.0115791	0.0435153
-4.34976	-0.0796033	0.00118722	0.153718	0.109513	0.0403336	-0.160423	-0.009238	0.0666723	-0.0689226	-0.00429602	-0.0149963	0.00387649	-0.0392564	-0.0140351	0.0211475	0.0103284	-0.00219511	0.0253864	-0.0350748	0.0190272	0.0115712	0.0435092
-4.34928	-0.0795877	0.0012236	0.153708	0.109484	0.0403758	-0.160474	-0.00921974	0.0666817	-0.0689013	-0.00426247	-0.0149652	0.00388212	-0.0392481	-0.0140182	0.0211733	0.0103236	-0.0021906	0.0253948	-0.0350596	0.0190341	0.0115632	0.0435031
-4.3488	-0.0795719	0.00126	0.153698	0.109456	0.040418	-0.160524	-0.00920148	0.0666911	-0.0688801	-0.00422892	-0.014934	0.00388778	-0.0392398	-0.0140013	0.0211992	0.0103189	-0.00218608	0.0254031	-0.0350445	0.0190409	0.0115553	0.0434969
-4.34832	-0.0795562	0.00129641	0.153687	0.109426	0.0404602	-0.160574	-0.00918325	0.0667005	-0.0688589	-0.00419535	-0.0149028	0.00389348	-0.0392315	-0.0139844	0.021225	0.0103141	-0.00218156	0.0254115	-0.0350294	0.0190478	0.0115474	0.0434907
-4.34784	-0.0795404	0.00133283	0.153677	0.109397	0.0405024	-0.160624	-0.00916504	0.06671	-0.0688376	-0.00416182	-0.0148717	0.00389919	-0.0392232	-0.0139674	0.0212509	0.0103093	-0.00217705	0.0254198	-0.0350142	0.0190547	0.0115395	0.0434846
-4.34736	-0.0795246	0.00136926	0.153666	0.109368	0.0405445	-0.160675	-0.00914685	0.0667194	-0.0688164	-0.00412827	-0.0148405	0.00390497	-0.0392149	-0.0139504	0.0212768	0.0103046	-0.00217253	0.0254282	-0.0349991	0.0190616	0.0115315	0.0434784
-4.34688	-0.0795088	0.00140571	0.153656	0.109339	0.0405866	-0.160725	-0.00912867	0.0667288	-0.0687952	-0.00409472	-0.0148093	0.00391078	-0.0392066	-0.0139334	0.0213027	0.0102998	-0.002168	0.0254366	-0.034984	0.0190685	0.0115235	0.0434722
-4.3464	-0.079493	0.00144217	0.153645	0.10931	0.0406288	-0.160775	-0.00911052	0.0667382	-0.068774	-0.00406119	-0.0147782	0.00391664	-0.0391983	-0.0139163	0.0213286	0.0102951	-0.00216347	0.025445	-0.0349689	0.0190754	0.0115155	0.0434659
-4.34592	-0.0794771	0.00147863	0.153635	0.109281	0.0406709	-0.160825	-0.00909238	0.0667477	-0.0687528	-0.00402765	-0.014747	0.00392253	-0.0391901	-0.0138992	0.0213546	0.0102903	-0.00215895	0.0254534	-0.0349538	0.0190823	0.0115075	0.0434597
-4.34544	-0.0794612	0.00151511	0.153624	0.109252	0.040713	-0.160875	-0.00907425	0.0667571	-0.0687317	-0.00399412	-0.0147159	0.00392847	-0.0391818	-0.0138821	0.0213805	0.0102855	-0.00215441	0.0254618	-0.0349387	0.0190893	0.0114994	0.0434535
-4.34496	-0.0794453	0.0015516	0.153613	0.109223	0.040755	-0.160925	-0.00905616	0.0667665	-0.0687105	-0.0039606	-0.0146847	0.00393444	-0.0391735	-0.0138649	0.0214064	0.0102808	-0.00214988	0.0254702	-0.0349236	0.0190962	0.0114914	0.0434472
-4.34448	-0.0794294	0.00158809	0.153602	0.109194	0.0407971	-0.160976	-0.00903806	0.0667759	-0.0686893	-0.00392707	-0.0146536	0.00394048	-0.0391653	-0.0138477	0.0214324	0.010276	-0.00214534	0.0254787	-0.0349085	0.0191032	0.0114833	0.043441
-4.344	-0.0794135	0.0016246	0.153592	0.109165	0.0408392	-0.161026	-0.00901999	0.0667854	-0.0686682	-0.00389357	-0.0146224	0.00394654	-0.0391571	-0.0138305	0.0214584	0.0102713	-0.0021408	0.0254871	-0.0348934	0.0191102	0.0114753	0.0434347
-4.34352	-0.0793975	0.00166112	0.153581	0.109136	0.0408812	-0.161076	-0.00900194	0.0667948	-0.0686471	-0.00386007	-0.0145913	0.00395266	-0.0391488	-0.0138132	0.0214843	0.0102665	-0.00213626	0.0254955	-0.0348784	0.0191172	0.0114672	0.0434284
-4.34304	-0.0793815	0.00169766	0.15357	0.109107	0.0409232	-0.161126	-0.00898389	0.0668042	-0.068626	-0.00382656	-0.0145601	0.0039588	-0.0391406	-0.0137959	0.0215103	0.0102617	-0.00213172	0.025504	-0.0348633	0.0191242	0.0114591	0.0434221
-4.34256	-0.0793655	0.00173422	0.153559	0.109078	0.0409653	-0.161176	-0.00896587	0.0668136	-0.0686048	-0.00379307	-0.014529	0.00396501	-0.0391323	-0.0137786	0.0215364	0.010257	-0.00212717	0.0255124	-0.0348482	0.0191313	0.0114509	0.0434158
-4.34208	-0.0793495	0.00177078	0.153548	0.109049	0.0410073	-0.161226	-0.00894786	0.0668231	-0.0685838	-0.00375957	-0.0144979	0.00397123	-0.0391241	-0.0137612	0.0215624	0.0102522	-0.00212263	0.0255208	-0.0348331	0.0191383	0.0114428	0.0434095
-4.3416	-0.0793334	0.00180736	0.153536	0.10902	0.0410493	-0.161276	-0.00892986	0.0668325	-0.0685627	-0.0037261	-0.0144668	0.00397753	-0.0391159	-0.0137438	0.0215884	0.0102475	-0.00211808	0.0255293	-0.0348181	0.0191454	0.0114346	0.0434031
-4.34112	-0.0793174	0.00184396	0.153525	0.108991	0.0410912	-0.161326	-0.00891187	0.0668419	-0.0685416	-0.00369263	-0.0144356	0.00398385	-0.0391077	-0.0137263	0.0216145	0.0102427	-0.00211354	0.0255378	-0.034803	0.0191524	0.0114265	0.0433968
-4.34064	-0.0793013	0.00188055	0.153514	0.108961	0.0411332	-0.161376	-0.00889392	0.0668513	-0.0685205	-0.00365916	-0.0144045	0.00399024	-0.0390995	-0.0137088	0.0216406	0.010238	-0.00210899	0.0255462	-0.0347879	0.0191595	0.0114183	0.0433904
-4.34016	-0.0792852	0.00191718	0.153503	0.108932	0.0411751	-0.161426	-0.00887597	0.0668608	-0.0684995	-0.00362571	-0.0143734	0.00399665	-0.0390913	-0.0136913	0.0216667	0.0102332	-0.00210445	0.0255547	-0.0347728	0.0191666	0.0114101	0.043384
-4.33968	-0.079269	0.00195381	0.153491	0.108903	0.0412171	-0.161476	-0.00885804	0.0668702	-0.0684785	-0.00359223	-0.0143423	0.00400311	-0.0390831	-0.0136738	0.0216928	0.0102285	-0.0020999	0.0255632	-0.0347578	0.0191738	0.0114019	0.0433776
-4.3392	-0.0792529	0.00199046	0.15348	0.108874	0.041259	-0.161526	-0.00884014	0.0668797	-0.0684574	-0.00355879	-0.0143111	0.0040096	-0.0390749	-0.0136562	0.0217189	0.0102238	-0.00209536	0.0255717	-0.0347427	0.0191809	0.0113936	0.0433712
-4.33872	-0.0792367	0.00202713	0.153468	0.108844	0.0413009	-0.161576	-0.00882228	0.0668891	-0.0684364	-0.00352531	-0.01428	0.00401613	-0.0390667	-0.0136385	0.021745	0.010219	-0.00209081	0.0255801	-0.0347277	0.0191881	0.0113854	0.0433648
-4.33824	-0.0792205	0.00206381	0.153457	0.108815	0.0413429	-0.161626	-0.00880442	0.0668986	-0.0684154	-0.00349186	-0.0142489	0.00402271	-0.0390585	-0.0136209	0.0217711	0.0102143	-0.00208626	0.0255886	-0.0347126	0.0191952	0.0113771	0.0433584
-4.33776	-0.0792042	0.0021005	0.153445	0.108785	0.0413848	-0.161676	-0.00878656	0.066908	-0.0683944	-0.00345838	-0.0142178	0.00402935	-0.0390503	-0.0136032	0.0217973	0.0102096	-0.00208171	0.0255971	-0.0346975	0.0192024	0.0113688	0.043352
-4.33728	-0.0791879	0.00213721	0.153434	0.108756	0.0414267	-0.161726	-0.00876873	0.0669175	-0.0683734	-0.00342493	-0.0141867	0.00403602	-0.0390421	-0.0135855	0.0218235	0.0102049	-0.00207716	0.0256056	-0.0346825	0.0192096	0.0113605	0.0433455
-4.3368	-0.0791717	0.00217393	0.153422	0.108726	0.0414686	-0.161775	-0.00875091	0.0669269	-0.0683524	-0.00339143	-0.0141556	0.00404274	-0.0390339	-0.0135677	0.0218497	0.0102002	-0.00207261	0.0256141	-0.0346674	0.0192168	0.0113522	0.0433391
-4.33632	-0.0791553	0.00221066	0.15341	0.108697	0.0415104	-0.161825	-0.00873311	0.0669364	-0.0683314	-0.00335796	-0.0141245	0.00404949	-0.0390258	-0.0135499	0.0218759	0.0101955	-0.00206806	0.0256226	-0.0346524	0.019224	0.0113439	0.0433326
-4.33584	-0.0791389	0.00224741	0.153398	0.108667	0.0415523	-0.161875	-0.00871533	0.0669458	-0.0683104	-0.00332447	-0.0140934	0.00405628	-0.0390176	-0.0135321	0.0219021	0.0101908	-0.00206352	0.0256311	-0.0346373	0.0192313	0.0113356	0.0433262
-4.33536	-0.0791226	0.00228416	0.153386	0.108638	0.0415941	-0.161925	-0.00869757	0.0669553	-0.0682894	-0.00329101	-0.0140623	0.00406312	-0.0390094	-0.0135142	0.0219283	0.0101861	-0.00205897	0.0256397	-0.0346223	0.0192385	0.0113272	0.0433197
-4.33488	-0.0791062	0.00232094	0.153375	0.108608	0.041636	-0.161975	-0.00867985	0.0669648	-0.0682684	-0.00325753	-0.0140312	0.00407	-0.0390012	-0.0134963	0.0219546	0.0101814	-0.00205442	0.0256482	-0.0346073	0.0192458	0.0113188	0.0433132
-4.3344	-0.0790898	0.00235772	0.153363	0.108578	0.0416778	-0.162025	-0.00866212	0.0669742	-0.0682474	-0.00322406	-0.014	0.00407692	-0.038993	-0.0134784	0.0219809	0.0101767	-0.00204988	0.0256568	-0.0345922	0.0192531	0.0113104	0.0433067
-4.33392	-0.0790733	0.00239453	0.153351	0.108549	0.0417196	-0.162074	-0.00864443	0.0669837	-0.0682264	-0.00319059	-0.0139689	0.00408388	-0.0389848	-0.0134604	0.0220071	0.010172	-0.00204534	0.0256653	-0.0345772	0.0192604	0.011302	0.0433001
-4.33344	-0.0790568	0.00243134	0.153338	0.108519	0.0417614	-0.162124	-0.00862675	0.0669932	-0.0682053	-0.00315713	-0.0139378	0.00409088	-0.0389766	-0.0134424	0.0220334	0.0101673	-0.00204079	0.0256739	-0.0345622	0.0192677	0.0112936	0.0432936
-4.33296	-0.0790403	0.00246817	0.153326	0.108489	0.0418032	-0.162174	-0.0086091	0.0670026	-0.0681843	-0.00312365	-0.0139067	0.00409791	-0.0389684	-0.0134243	0.0220597	0.0101627	-0.00203625	0.0256824	-0.0345472	0.0192751	0.0112851	0.0432871
-4.33248	-0.0790238	0.00250499	0.153314	0.10846	0.041845	-0.162224	-0.00859145	0.0670121	-0.0681633	-0.00309019	-0.0138755	0.00410499	-0.0389603	-0.0134062	0.0220861	0.010158	-0.0020317	0.025691	-0.0345322	0.0192825	0.0112767	0.0432805
-4.332	-0.0790072	0.00254185	0.153302	0.10843	0.0418868	-0.162273	-0.00857382	0.0670216	-0.0681423	-0.00305672	-0.0138444	0.0041121	-0.0389521	-0.0133881	0.0221124	0.0101533	-0.00202716	0.0256996	-0.0345171	0.0192898	0.0112682	0.0432739
-4.33152	-0.0789906	0.0025787	0.153289	0.1084	0.0419286	-0.162323	-0.00855621	0.0670311	-0.0681212	-0.00302326	-0.0138133	0.00411924	-0.0389439	-0.0133699	0.0221387	0.0101487	-0.00202261	0.0257082	-0.0345021	0.0192973	0.0112597	0.0432673
-4.33104	-0.078974	0.00261555	0.153277	0.10837	0.0419703	-0.162373	-0.00853861	0.0670405	-0.0681002	-0.00298981	-0.0137821	0.00412643	-0.0389358	-0.0133517	0.0221651	0.010144	-0.00201806	0.0257168	-0.0344871	0.0193047	0.0112512	0.0432607
-4.33056	-0.0789573	0.00265242	0.153265	0.10834	0.0420121	-0.162423	-0.00852101	0.06705	-0.0680792	-0.00295638	-0.0137509	0.00413364	-0.0389276	-0.0133335	0.0221915	0.0101393	-0.00201352	0.0257254	-0.0344721	0.0193121	0.0112426	0.0432541
-4.33008	-0.0789406	0.0026893	0.153252	0.10831	0.0420538	-0.162472	-0.00850344	0.0670595	-0.0680582	-0.00292293	-0.0137197	0.0041409	-0.0389195	-0.0133152	0.0222179	0.0101347	-0.00200897	0.025734	-0.0344571	0.0193196	0.0112341	0.0432475
-4.3296	-0.0789239	0.00272619	0.15324	0.10828	0.0420955	-0.162522	-0.00848587	0.067069	-0.0680371	-0.00288948	-0.0136885	0.00414818	-0.0389113	-0.0132969	0.0222443	0.0101301	-0.00200442	0.0257427	-0.0344421	0.0193271	0.0112255	0.0432408
-4.32912	-0.0789071	0.00276309	0.153227	0.10825	0.0421372	-0.162572	-0.00846832	0.0670785	-0.0680161	-0.00285608	-0.0136573	0.00415549	-0.0389032	-0.0132786	0.0222707	0.0101254	-0.00199987	0.0257513	-0.034427	0.0193346	0.0112169	0.0432342
-4.32864	-0.0788903	0.00279999	0.153214	0.10822	0.0421789	-0.162622	-0.00845077	0.067088	-0.0679951	-0.00282266	-0.013626	0.00416283	-0.038895	-0.0132602	0.0222972	0.0101208	-0.00199533	0.0257599	-0.034412	0.0193422	0.0112083	0.0432275
-4.32816	-0.0788735	0.0028369	0.153202	0.10819	0.0422206	-0.162671	-0.00843324	0.0670975	-0.0679741	-0.00278926	-0.0135948	0.00417021	-0.0388869	-0.0132418	0.0223236	0.0101162	-0.00199078	0.0257685	-0.034397	0.0193497	0.0111997	0.0432208
-4.32768	-0.0788566	0.00287382	0.153189	0.10816	0.0422623	-0.162721	-0.00841573	0.067107	-0.0679531	-0.00275585	-0.0135636	0.00417763	-0.0388788	-0.0132234	0.0223501	0.0101115	-0.00198622	0.0257772	-0.034382	0.0193573	0.011191	0.0432141
-4.3272	-0.0788398	0.00291077	0.153176	0.10813	0.0423039	-0.162771	-0.00839823	0.0671165	-0.0679321	-0.00272246	-0.0135324	0.00418508	-0.0388707	-0.013205	0.0223766	0.0101069	-0.00198168	0.0257859	-0.034367	0.0193649	0.0111823	0.0432073
-4.32672	-0.0788229	0.00294771	0.153163	0.108099	0.0423456	-0.162821	-0.00838072	0.067126	-0.0679111	-0.00268905	-0.0135011	0.00419257	-0.0388626	-0.0131865	0.0224031	0.0101023	-0.00197714	0.0257945	-0.034352	0.0193725	0.0111737	0.0432006
-4.32624	-0.0788059	0.00298467	0.15315	0.108069	0.0423872	-0.16287	-0.00836324	0.0671355	-0.0678901	-0.00265567	-0.0134699	0.0042001	-0.0388545	-0.013168	0.0224297	0.0100977	-0.00197259	0.0258032	-0.0343369	0.0193801	0.011165	0.0431938
-4.32576	-0.078789	0.00302163	0.153137	0.108039	0.0424288	-0.16292	-0.00834576	0.067145	-0.0678691	-0.00262226	-0.0134386	0.00420765	-0.0388464	-0.0131494	0.0224562	0.0100931	-0.00196804	0.0258119	-0.0343219	0.0193878	0.0111563	0.0431871
-4.32528	-0.078772	0.00305861	0.153124	0.108009	0.0424704	-0.16297	-0.00832829	0.0671545	-0.0678481	-0.00258889	-0.0134074	0.00421529	-0.0388383	-0.0131309	0.0224828	0.0100885	-0.00196349	0.0258206	-0.0343069	0.0193955	0.0111475	0.0431803
-4.3248	-0.078755	0.00309559	0.153111	0.107978	0.042512	-0.16302	-0.00831082	0.067164	-0.0678271	-0.0025555	-0.0133761	0.00422292	-0.0388302	-0.0131123	0.0225094	0.0100839	-0.00195894	0.0258293	-0.0342919	0.0194031	0.0111388	0.0431735
-4.32432	-0.078738	0.00313258	0.153098	0.107948	0.0425536	-0.163069	-0.00829339	0.0671735	-0.067806	-0.00252212	-0.0133449	0.00423062	-0.0388221	-0.0130936	0.022536	0.0100793	-0.00195438	0.025838	-0.0342769	0.0194109	0.01113	0.0431667
-4.32384	-0.078721	0.00316957	0.153085	0.107918	0.0425952	-0.163119	-0.00827595	0.067183	-0.067785	-0.00248873	-0.0133136	0.00423834	-0.038814	-0.013075	0.0225626	0.0100747	-0.00194984	0.0258467	-0.0342619	0.0194186	0.0111212	0.0431598
-4.32336	-0.078704	0.00320658	0.153072	0.107887	0.0426367	-0.163169	-0.00825855	0.0671926	-0.067764	-0.00245538	-0.0132823	0.00424612	-0.038806	-0.0130563	0.0225892	0.0100701	-0.00194528	0.0258554	-0.0342469	0.0194263	0.0111125	0.043153
-4.32288	-0.0786869	0.00324359	0.153058	0.107857	0.0426783	-0.163219	-0.00824116	0.0672021	-0.0677429	-0.00242198	-0.013251	0.00425395	-0.0387979	-0.0130376	0.0226159	0.0100655	-0.00194073	0.0258641	-0.0342319	0.0194341	0.0111036	0.0431461
-4.3224	-0.0786699	0.00328061	0.153045	0.107827	0.0427198	-0.163269	-0.0082238	0.0672116	-0.0677219	-0.00238863	-0.0132197	0.00426183	-0.0387899	-0.0130188	0.0226425	0.0100609	-0.00193618	0.0258728	-0.0342169	0.0194419	0.0110948	0.0431393
-4.32192	-0.0786528	0.00331762	0.153032	0.107796	0.0427614	-0.163319	-0.00820646	0.0672211	-0.0677008	-0.00235526	-0.0131884	0.00426972	-0.0387818	-0.013	0.0226692	0.0100562	-0.00193162	0.0258816	-0.0342019	0.0194496	0.011086	0.0431324
-4.32144	-0.0786358	0.00335465	0.153018	0.107766	0.0428029	-0.163368	-0.00818912	0.0672307	-0.0676798	-0.00232192	-0.013157	0.00427766	-0.0387738	-0.0129812	0.0226959	0.0100516	-0.00192707	0.0258903	-0.0341869	0.0194575	0.0110771	0.0431255
-4.32096	-0.0786187	0.00339168	0.153005	0.107735	0.0428444	-0.163418	-0.00817181	0.0672402	-0.0676588	-0.00228854	-0.0131257	0.00428563	-0.0387658	-0.0129624	0.0227226	0.010047	-0.00192252	0.0258991	-0.034172	0.0194653	0.0110682	0.0431186
-4.32048	-0.0786017	0.00342873	0.152991	0.107705	0.0428859	-0.163468	-0.00815453	0.0672497	-0.0676377	-0.00225521	-0.0130943	0.00429366	-0.0387578	-0.0129436	0.0227493	0.0100424	-0.00191796	0.0259079	-0.034157	0.0194731	0.0110593	0.0431117
-4.32	-0.0785847	0.00346577	0.152978	0.107674	0.0429273	-0.163518	-0.00813724	0.0672593	-0.0676167	-0.00222186	-0.0130629	0.00430171	-0.0387498	-0.0129247	0.0227761	0.0100377	-0.00191341	0.0259166	-0.034142	0.019481	0.0110504	0.0431047
-4.31952	-0.0785677	0.0035028	0.152964	0.107643	0.0429688	-0.163568	-0.00811998	0.0672688	-0.0675956	-0.00218852	-0.0130316	0.0043098	-0.0387419	-0.0129058	0.0228028	0.0100331	-0.00190886	0.0259254	-0.034127	0.0194889	0.0110415	0.0430978
-4.31904	-0.0785507	0.00353988	0.152951	0.107613	0.0430102	-0.163618	-0.00810274	0.0672783	-0.0675746	-0.0021552	-0.0130001	0.00431793	-0.0387339	-0.0128869	0.0228296	0.0100285	-0.0019043	0.0259342	-0.034112	0.0194968	0.0110326	0.0430908
-4.31856	-0.0785338	0.00357695	0.152937	0.107582	0.0430517	-0.163668	-0.00808552	0.0672879	-0.0675535	-0.00212186	-0.0129687	0.00432614	-0.0387259	-0.0128679	0.0228564	0.0100239	-0.00189975	0.025943	-0.034097	0.0195048	0.0110236	0.0430839
-4.31808	-0.0785168	0.00361405	0.152923	0.107552	0.0430931	-0.163718	-0.00806831	0.0672974	-0.0675324	-0.00208855	-0.0129373	0.00433436	-0.038718	-0.0128489	0.0228832	0.0100192	-0.00189519	0.0259519	-0.034082	0.0195127	0.0110146	0.0430769
-4.3176	-0.0784999	0.00365114	0.152909	0.107521	0.0431345	-0.163767	-0.00805112	0.067307	-0.0675114	-0.00205524	-0.0129058	0.00434262	-0.03871	-0.0128299	0.0229101	0.0100146	-0.00189064	0.0259607	-0.034067	0.0195207	0.0110056	0.0430699
-4.31712	-0.0784829	0.00368827	0.152895	0.10749	0.0431759	-0.163817	-0.00803394	0.0673165	-0.0674903	-0.00202192	-0.0128743	0.00435091	-0.0387021	-0.0128109	0.0229369	0.01001	-0.00188608	0.0259696	-0.0340521	0.0195287	0.0109966	0.0430629
-4.31664	-0.078466	0.00372541	0.152882	0.107459	0.0432173	-0.163867	-0.00801678	0.067326	-0.0674693	-0.00198863	-0.0128429	0.00435925	-0.0386941	-0.0127918	0.0229638	0.0100054	-0.00188153	0.0259784	-0.0340371	0.0195367	0.0109876	0.0430559
-4.31616	-0.078449	0.00376255	0.152868	0.107429	0.0432587	-0.163917	-0.00799963	0.0673356	-0.0674482	-0.00195535	-0.0128114	0.00436763	-0.0386862	-0.0127727	0.0229907	0.0100008	-0.00187696	0.0259873	-0.0340221	0.0195447	0.0109785	0.0430489
-4.31568	-0.0784321	0.00379971	0.152854	0.107398	0.0433001	-0.163967	-0.00798251	0.0673452	-0.0674272	-0.00192207	-0.0127799	0.00437606	-0.0386783	-0.0127536	0.0230175	0.00999613	-0.0018724	0.0259962	-0.0340071	0.0195528	0.0109695	0.0430419
-4.3152	-0.0784152	0.00383688	0.15284	0.107367	0.0433414	-0.164017	-0.0079654	0.0673547	-0.0674061	-0.00188879	-0.0127485	0.00438454	-0.0386703	-0.0127344	0.0230445	0.00999152	-0.00186784	0.0260051	-0.0339922	0.0195609	0.0109604	0.0430348
-4.31472	-0.0783982	0.00387406	0.152826	0.107336	0.0433828	-0.164067	-0.00794832	0.0673643	-0.067385	-0.00185555	-0.012717	0.00439307	-0.0386624	-0.0127153	0.0230714	0.00998691	-0.00186327	0.026014	-0.0339772	0.019569	0.0109513	0.0430278
-4.31424	-0.0783813	0.00391127	0.152811	0.107305	0.0434241	-0.164117	-0.00793124	0.0673738	-0.067364	-0.00182229	-0.0126855	0.00440163	-0.0386545	-0.0126961	0.0230983	0.00998231	-0.0018587	0.0260229	-0.0339623	0.0195771	0.0109422	0.0430207
-4.31376	-0.0783643	0.00394848	0.152797	0.107274	0.0434654	-0.164167	-0.00791418	0.0673834	-0.0673429	-0.00178906	-0.0126539	0.00441027	-0.0386466	-0.0126768	0.0231253	0.00997772	-0.00185413	0.0260318	-0.0339473	0.0195852	0.0109331	0.0430136
-4.31328	-0.0783474	0.00398572	0.152783	0.107244	0.0435068	-0.164217	-0.00789714	0.0673929	-0.0673218	-0.00175582	-0.0126224	0.00441892	-0.0386387	-0.0126576	0.0231523	0.00997313	-0.00184956	0.0260408	-0.0339324	0.0195934	0.0109239	0.0430066
-4.3128	-0.0783304	0.00402298	0.152769	0.107213	0.0435481	-0.164267	-0.00788013	0.0674025	-0.0673008	-0.00172261	-0.0125909	0.00442763	-0.0386308	-0.0126383	0.0231792	0.00996855	-0.00184499	0.0260497	-0.0339174	0.0196016	0.0109147	0.0429995
-4.31232	-0.0783134	0.00406025	0.152755	0.107181	0.0435893	-0.164317	-0.00786312	0.0674121	-0.0672797	-0.00168941	-0.0125593	0.00443635	-0.0386229	-0.012619	0.0232062	0.00996396	-0.00184042	0.0260586	-0.0339025	0.0196098	0.0109056	0.0429924
-4.31184	-0.0782965	0.00409754	0.15274	0.10715	0.0436306	-0.164366	-0.00784617	0.0674216	-0.0672587	-0.00165622	-0.0125278	0.00444517	-0.038615	-0.0125996	0.0232332	0.00995939	-0.00183583	0.0260676	-0.0338876	0.019618	0.0108964	0.0429853
-4.31136	-0.0782796	0.00413485	0.152726	0.107119	0.0436719	-0.164417	-0.00782922	0.0674312	-0.0672376	-0.00162304	-0.0124962	0.00445399	-0.0386071	-0.0125802	0.0232603	0.00995483	-0.00183126	0.0260766	-0.0338727	0.0196262	0.0108871	0.0429781
-4.31088	-0.0782626	0.00417217	0.152711	0.107088	0.0437131	-0.164467	-0.0078123	0.0674408	-0.0672165	-0.00158985	-0.0124647	0.00446286	-0.0385993	-0.0125609	0.0232873	0.00995026	-0.00182669	0.0260855	-0.0338577	0.0196345	0.0108779	0.042971
-4.3104	-0.0782457	0.00420952	0.152697	0.107057	0.0437544	-0.164517	-0.00779542	0.0674504	-0.0671955	-0.00155668	-0.0124331	0.00447177	-0.0385914	-0.0125414	0.0233143	0.0099457	-0.00182211	0.0260945	-0.0338428	0.0196428	0.0108687	0.0429639
-4.30992	-0.0782287	0.00424689	0.152682	0.107026	0.0437956	-0.164567	-0.00777856	0.06746	-0.0671744	-0.00152354	-0.0124015	0.00448074	-0.0385835	-0.012522	0.0233414	0.00994114	-0.00181753	0.0261035	-0.0338279	0.0196511	0.0108594	0.0429567
-4.30944	-0.0782118	0.00428426	0.152668	0.106995	0.0438368	-0.164617	-0.00776174	0.0674695	-0.0671533	-0.00149039	-0.0123699	0.00448974	-0.0385757	-0.0125026	0.0233685	0.00993658	-0.00181295	0.0261125	-0.033813	0.0196594	0.0108502	0.0429495
-4.30896	-0.0781949	0.00432165	0.152653	0.106963	0.0438781	-0.164667	-0.00774493	0.0674791	-0.0671323	-0.00145725	-0.0123384	0.00449879	-0.0385678	-0.0124831	0.0233956	0.00993202	-0.00180836	0.0261215	-0.0337981	0.0196677	0.0108409	0.0429424
-4.30848	-0.0781779	0.00435905	0.152639	0.106932	0.0439193	-0.164717	-0.00772815	0.0674887	-0.0671112	-0.00142413	-0.0123067	0.00450787	-0.0385599	-0.0124636	0.0234226	0.00992748	-0.00180377	0.0261306	-0.0337832	0.0196761	0.0108316	0.0429352
-4.308	-0.078161	0.00439646	0.152624	0.106901	0.0439604	-0.164767	-0.0077114	0.0674983	-0.0670901	-0.001391	-0.0122752	0.004517	-0.0385521	-0.0124441	0.0234498	0.00992293	-0.00179919	0.0261396	-0.0337682	0.0196845	0.0108222	0.042928
-4.30752	-0.0781441	0.00443388	0.152609	0.10687	0.0440016	-0.164817	-0.00769468	0.0675079	-0.067069	-0.0013579	-0.0122436	0.00452617	-0.0385442	-0.0124246	0.0234769	0.00991839	-0.00179461	0.0261486	-0.0337534	0.0196929	0.0108129	0.0429207
-4.30704	-0.0781273	0.0044713	0.152594	0.106838	0.0440428	-0.164867	-0.00767797	0.0675175	-0.067048	-0.00132481	-0.012212	0.00453539	-0.0385363	-0.0124051	0.023504	0.00991386	-0.00179001	0.0261577	-0.0337385	0.0197013	0.0108035	0.0429135
-4.30656	-0.0781106	0.00450872	0.152579	0.106807	0.044084	-0.164917	-0.00766131	0.0675271	-0.0670269	-0.00129171	-0.0121804	0.00454464	-0.0385285	-0.0123855	0.0235312	0.00990932	-0.00178542	0.0261668	-0.0337236	0.0197097	0.0107942	0.0429063
-4.30608	-0.0780938	0.00454618	0.152565	0.106776	0.0441251	-0.164968	-0.00764467	0.0675367	-0.0670059	-0.00125863	-0.0121488	0.00455393	-0.0385206	-0.0123659	0.0235583	0.00990478	-0.00178083	0.0261758	-0.0337087	0.0197182	0.0107848	0.042899
-4.3056	-0.0780771	0.00458362	0.15255	0.106744	0.0441663	-0.165018	-0.00762806	0.0675463	-0.0669848	-0.00122555	-0.0121171	0.00456325	-0.0385128	-0.0123464	0.0235855	0.00990025	-0.00177624	0.0261849	-0.0336938	0.0197266	0.0107754	0.0428918
-4.30512	-0.0780604	0.00462107	0.152535	0.106713	0.0442074	-0.165068	-0.00761147	0.0675558	-0.0669638	-0.00119249	-0.0120855	0.00457263	-0.0385049	-0.0123268	0.0236127	0.00989572	-0.00177164	0.026194	-0.0336789	0.0197351	0.010766	0.0428845
-4.30464	-0.0780437	0.00465852	0.15252	0.106681	0.0442485	-0.165118	-0.00759491	0.0675654	-0.0669427	-0.00115944	-0.0120539	0.00458203	-0.038497	-0.0123072	0.0236399	0.00989118	-0.00176704	0.0262031	-0.033664	0.0197436	0.0107566	0.0428772
-4.30416	-0.0780271	0.00469598	0.152505	0.10665	0.0442897	-0.165168	-0.00757838	0.067575	-0.0669217	-0.00112639	-0.0120222	0.00459146	-0.0384892	-0.0122876	0.0236671	0.00988664	-0.00176243	0.0262122	-0.0336491	0.0197521	0.0107471	0.0428699
-4.30368	-0.0780104	0.00473343	0.15249	0.106618	0.0443308	-0.165219	-0.00756186	0.0675846	-0.0669006	-0.00109335	-0.0119906	0.00460094	-0.0384813	-0.0122679	0.0236944	0.00988211	-0.00175782	0.0262214	-0.0336342	0.0197607	0.0107376	0.0428626
-4.3032	-0.0779938	0.00477091	0.152474	0.106587	0.0443719	-0.165269	-0.00754538	0.0675943	-0.0668795	-0.00106032	-0.0119589	0.00461046	-0.0384735	-0.0122483	0.0237216	0.00987758	-0.00175321	0.0262305	-0.0336193	0.0197692	0.0107282	0.0428553
-4.30272	-0.0779771	0.00480836	0.152459	0.106555	0.044413	-0.165319	-0.00752891	0.0676038	-0.0668585	-0.0010273	-0.0119272	0.00462001	-0.0384656	-0.0122286	0.0237488	0.00987305	-0.00174859	0.0262396	-0.0336044	0.0197778	0.0107187	0.0428479
-4.30224	-0.0779605	0.00484582	0.152444	0.106524	0.044454	-0.165369	-0.00751248	0.0676134	-0.0668374	-0.000994304	-0.0118956	0.00462963	-0.0384577	-0.0122089	0.0237761	0.00986851	-0.00174397	0.0262488	-0.0335895	0.0197864	0.0107092	0.0428406
-4.30176	-0.0779439	0.00488329	0.152429	0.106492	0.0444951	-0.16542	-0.00749606	0.067623	-0.0668163	-0.000961295	-0.0118639	0.00463926	-0.0384498	-0.0121891	0.0238034	0.00986398	-0.00173935	0.0262579	-0.0335746	0.019795	0.0106997	0.0428332
-4.30128	-0.0779272	0.00492077	0.152413	0.106461	0.0445362	-0.16547	-0.00747968	0.0676327	-0.0667952	-0.000928295	-0.0118322	0.00464894	-0.038442	-0.0121694	0.0238307	0.00985945	-0.00173472	0.0262671	-0.0335597	0.0198036	0.0106901	0.0428258
-4.3008	-0.0779106	0.00495824	0.152398	0.106429	0.0445772	-0.16552	-0.00746332	0.0676423	-0.0667741	-0.000895312	-0.0118005	0.00465864	-0.0384341	-0.0121496	0.023858	0.00985491	-0.00173009	0.0262763	-0.0335448	0.0198122	0.0106806	0.0428184
-4.30032	-0.077894	0.00499571	0.152383	0.106397	0.0446182	-0.16557	-0.007447	0.0676519	-0.066753	-0.000862318	-0.0117688	0.00466838	-0.0384263	-0.0121298	0.0238853	0.00985039	-0.00172545	0.0262855	-0.0335299	0.0198209	0.010671	0.042811
-4.29984	-0.0778774	0.0050332	0.152367	0.106366	0.0446592	-0.165621	-0.00743068	0.0676615	-0.0667319	-0.000829357	-0.0117371	0.00467815	-0.0384184	-0.01211	0.0239127	0.00984587	-0.00172081	0.0262948	-0.033515	0.0198296	0.0106614	0.0428036
-4.29936	-0.0778609	0.00507066	0.152352	0.106334	0.0447002	-0.165671	-0.00741441	0.0676711	-0.0667108	-0.000796388	-0.0117054	0.00468793	-0.0384105	-0.0120901	0.02394	0.00984136	-0.00171617	0.026304	-0.0335	0.0198382	0.0106518	0.0427962
-4.29888	-0.0778444	0.00510813	0.152336	0.106302	0.0447413	-0.165721	-0.00739814	0.0676807	-0.0666897	-0.000763419	-0.0116737	0.00469772	-0.0384027	-0.0120702	0.0239674	0.00983685	-0.00171152	0.0263132	-0.0334851	0.0198469	0.0106422	0.0427887
-4.2984	-0.077828	0.00514559	0.152321	0.10627	0.0447822	-0.165772	-0.00738191	0.0676903	-0.0666685	-0.000730472	-0.011642	0.00470753	-0.0383948	-0.0120503	0.0239948	0.00983236	-0.00170687	0.0263225	-0.0334702	0.0198556	0.0106326	0.0427813
-4.29792	-0.0778115	0.00518307	0.152305	0.106239	0.0448232	-0.165822	-0.0073657	0.0676999	-0.0666474	-0.000697524	-0.0116103	0.00471735	-0.038387	-0.0120304	0.0240222	0.00982787	-0.00170222	0.0263318	-0.0334553	0.0198644	0.0106229	0.0427738
-4.29744	-0.077795	0.00522053	0.152289	0.106207	0.0448642	-0.165872	-0.0073495	0.0677095	-0.0666263	-0.000664579	-0.0115786	0.0047272	-0.0383791	-0.0120104	0.0240496	0.00982339	-0.00169757	0.0263411	-0.0334404	0.0198731	0.0106132	0.0427664
-4.29696	-0.0777786	0.00525799	0.152274	0.106175	0.0449051	-0.165922	-0.00733332	0.0677191	-0.0666052	-0.000631653	-0.0115468	0.00473706	-0.0383713	-0.0119904	0.024077	0.00981892	-0.0016929	0.0263504	-0.0334255	0.0198819	0.0106036	0.0427589
-4.29648	-0.0777622	0.00529544	0.152258	0.106143	0.0449461	-0.165973	-0.00731718	0.0677287	-0.0665841	-0.000598716	-0.0115151	0.00474693	-0.0383634	-0.0119704	0.0241044	0.00981446	-0.00168824	0.0263597	-0.0334106	0.0198906	0.0105939	0.0427514
-4.296	-0.0777457	0.00533289	0.152242	0.106111	0.044987	-0.166023	-0.00730104	0.0677383	-0.0665629	-0.000565801	-0.0114834	0.0047568	-0.0383556	-0.0119503	0.0241319	0.00981001	-0.00168356	0.026369	-0.0333957	0.0198994	0.0105842	0.0427439
-4.29552	-0.0777292	0.00537034	0.152226	0.106079	0.045028	-0.166073	-0.00728495	0.0677479	-0.0665419	-0.000532891	-0.0114517	0.00476671	-0.0383477	-0.0119303	0.0241593	0.00980557	-0.00167889	0.0263783	-0.0333808	0.0199083	0.0105744	0.0427364
-4.29504	-0.0777128	0.00540779	0.152211	0.106048	0.0450689	-0.166123	-0.00726885	0.0677576	-0.0665207	-0.000499974	-0.0114199	0.00477661	-0.0383398	-0.0119101	0.0241868	0.00980113	-0.00167421	0.0263877	-0.0333659	0.0199171	0.0105647	0.0427288
-4.29456	-0.0776962	0.00544524	0.152195	0.106016	0.0451098	-0.166174	-0.00725279	0.0677672	-0.0664997	-0.00046708	-0.0113882	0.00478655	-0.038332	-0.01189	0.0242143	0.00979671	-0.00166953	0.026397	-0.033351	0.0199259	0.010555	0.0427213
-4.29408	-0.0776797	0.00548268	0.152179	0.105984	0.0451507	-0.166224	-0.00723673	0.0677768	-0.0664786	-0.000434179	-0.0113565	0.00479648	-0.0383241	-0.0118698	0.0242418	0.00979228	-0.00166484	0.0264064	-0.0333361	0.0199348	0.0105452	0.0427137
-4.2936	-0.0776632	0.00552012	0.152163	0.105951	0.0451916	-0.166274	-0.00722071	0.0677864	-0.0664575	-0.000401297	-0.0113247	0.00480647	-0.0383162	-0.0118496	0.0242693	0.00978788	-0.00166016	0.0264158	-0.0333212	0.0199436	0.0105354	0.0427062
-4.29312	-0.0776466	0.00555757	0.152147	0.105919	0.0452324	-0.166325	-0.0072047	0.0677961	-0.0664364	-0.000368413	-0.011293	0.00481642	-0.0383083	-0.0118293	0.0242968	0.00978346	-0.00165547	0.0264252	-0.0333063	0.0199525	0.0105256	0.0426986
-4.29264	-0.07763	0.00559501	0.152131	0.105887	0.0452733	-0.166375	-0.00718872	0.0678057	-0.0664153	-0.000335534	-0.0112612	0.00482643	-0.0383004	-0.0118091	0.0243243	0.00977907	-0.00165077	0.0264346	-0.0332914	0.0199614	0.0105158	0.0426911
-4.29216	-0.0776134	0.00563247	0.152115	0.105855	0.0453142	-0.166425	-0.00717276	0.0678153	-0.0663942	-0.000302667	-0.0112294	0.00483642	-0.0382925	-0.0117887	0.0243519	0.00977467	-0.00164606	0.026444	-0.0332764	0.0199703	0.010506	0.0426835
-4.29168	-0.0775967	0.00566991	0.152099	0.105823	0.045355	-0.166476	-0.00715683	0.0678249	-0.0663731	-0.00026979	-0.0111977	0.00484645	-0.0382846	-0.0117684	0.0243794	0.00977029	-0.00164136	0.0264535	-0.0332615	0.0199792	0.0104961	0.0426759
-4.2912	-0.07758	0.00570736	0.152083	0.105791	0.0453959	-0.166526	-0.00714091	0.0678346	-0.0663521	-0.000236939	-0.0111659	0.00485644	-0.0382767	-0.011748	0.024407	0.00976591	-0.00163664	0.0264629	-0.0332466	0.0199881	0.0104863	0.0426683
-4.29072	-0.0775633	0.00574479	0.152066	0.105759	0.0454367	-0.166576	-0.007125	0.0678442	-0.066331	-0.000204089	-0.0111341	0.00486647	-0.0382688	-0.0117275	0.0244346	0.00976153	-0.00163192	0.0264724	-0.0332317	0.0199971	0.0104764	0.0426607
-4.29024	-0.0775465	0.00578224	0.15205	0.105726	0.0454775	-0.166627	-0.00710912	0.0678538	-0.0663099	-0.000171245	-0.0111023	0.0048765	-0.0382609	-0.011707	0.0244622	0.00975716	-0.00162719	0.0264819	-0.0332168	0.0200061	0.0104665	0.0426531
-4.28976	-0.0775296	0.00581969	0.152034	0.105694	0.0455183	-0.166677	-0.00709325	0.0678635	-0.0662888	-0.000138409	-0.0110705	0.00488655	-0.038253	-0.0116865	0.0244897	0.0097528	-0.00162247	0.0264913	-0.0332019	0.0200151	0.0104566	0.0426454
-4.28928	-0.0775128	0.00585713	0.152018	0.105662	0.0455591	-0.166727	-0.00707741	0.0678731	-0.0662677	-0.00010558	-0.0110387	0.00489662	-0.0382451	-0.011666	0.0245173	0.00974843	-0.00161773	0.0265009	-0.033187	0.0200241	0.0104467	0.0426378
-4.2888	-0.0774959	0.00589456	0.152001	0.105629	0.0455999	-0.166778	-0.00706155	0.0678827	-0.0662466	-7.27624e-05	-0.0110069	0.00490672	-0.0382372	-0.0116454	0.024545	0.00974408	-0.001613	0.0265104	-0.0331721	0.0200331	0.0104368	0.0426302
-4.28832	-0.077479	0.00593201	0.151985	0.105597	0.0456407	-0.166828	-0.00704572	0.0678924	-0.0662255	-3.9943e-05	-0.0109751	0.00491682	-0.0382292	-0.0116248	0.0245726	0.00973973	-0.00160826	0.0265199	-0.0331572	0.0200421	0.0104268	0.0426225
-4.28784	-0.077462	0.00596944	0.151969	0.105565	0.0456815	-0.166879	-0.00702991	0.067902	-0.0662044	-7.13256e-06	-0.0109433	0.00492695	-0.0382213	-0.0116041	0.0246002	0.00973539	-0.00160351	0.0265294	-0.0331423	0.0200512	0.0104169	0.0426148
-4.28736	-0.0774451	0.00600688	0.151952	0.105532	0.0457222	-0.166929	-0.0070141	0.0679117	-0.0661833	2.56812e-05	-0.0109116	0.00493708	-0.0382134	-0.0115835	0.0246278	0.00973104	-0.00159876	0.026539	-0.0331274	0.0200603	0.0104069	0.0426072
-4.28688	-0.0774281	0.00604433	0.151936	0.1055	0.045763	-0.16698	-0.00699831	0.0679213	-0.0661622	5.84808e-05	-0.0108798	0.00494723	-0.0382055	-0.0115628	0.0246555	0.0097267	-0.00159402	0.0265485	-0.0331125	0.0200694	0.0103969	0.0425995
-4.2864	-0.0774111	0.00608178	0.151919	0.105467	0.0458038	-0.16703	-0.00698254	0.067931	-0.0661411	9.1289e-05	-0.010848	0.00495736	-0.0381975	-0.011542	0.0246832	0.00972236	-0.00158925	0.0265581	-0.0330976	0.0200785	0.010387	0.0425918
-4.28592	-0.0773942	0.00611923	0.151903	0.105435	0.0458445	-0.167081	-0.0069668	0.0679406	-0.06612	0.000124083	-0.0108163	0.00496753	-0.0381896	-0.0115213	0.0247108	0.00971803	-0.00158449	0.0265677	-0.0330827	0.0200876	0.010377	0.0425841
-4.28544	-0.0773772	0.00615668	0.151886	0.105402	0.0458852	-0.167131	-0.00695104	0.0679503	-0.0660989	0.000156893	-0.0107845	0.0049777	-0.0381816	-0.0115005	0.0247385	0.00971369	-0.00157972	0.0265773	-0.0330679	0.0200968	0.010367	0.0425764
-4.28496	-0.0773603	0.00619414	0.15187	0.10537	0.0459259	-0.167182	-0.00693532	0.0679599	-0.0660778	0.00018968	-0.0107528	0.0049879	-0.0381737	-0.0114797	0.0247662	0.00970937	-0.00157495	0.0265869	-0.0330529	0.0201059	0.0103569	0.0425687
-4.28448	-0.0773434	0.00623161	0.151853	0.105337	0.0459667	-0.167232	-0.00691961	0.0679696	-0.0660567	0.000222465	-0.010721	0.00499807	-0.0381657	-0.0114588	0.0247939	0.00970505	-0.00157017	0.0265965	-0.0330381	0.0201151	0.0103469	0.042561
-4.284	-0.0773266	0.00626908	0.151836	0.105305	0.0460073	-0.167283	-0.00690392	0.0679792	-0.0660356	0.000255245	-0.0106892	0.00500827	-0.0381578	-0.011438	0.0248216	0.00970074	-0.00156538	0.0266061	-0.0330232	0.0201243	0.0103368	0.0425533
-4.28352	-0.0773097	0.00630654	0.15182	0.105272	0.046048	-0.167334	-0.00688823	0.0679888	-0.0660144	0.000288021	-0.0106575	0.00501848	-0.0381498	-0.0114171	0.0248493	0.00969644	-0.00156059	0.0266158	-0.0330083	0.0201335	0.0103268	0.0425456
-4.28304	-0.0772928	0.006344	0.151803	0.10524	0.0460887	-0.167384	-0.00687255	0.0679985	-0.0659933	0.000320772	-0.0106257	0.00502871	-0.0381418	-0.0113961	0.0248771	0.00969215	-0.00155578	0.0266254	-0.0329934	0.0201427	0.0103167	0.0425379
-4.28256	-0.0772759	0.00638147	0.151786	0.105207	0.0461294	-0.167435	-0.00685688	0.0680081	-0.0659722	0.000353534	-0.0105939	0.00503895	-0.0381339	-0.0113752	0.0249048	0.00968787	-0.00155097	0.0266351	-0.0329785	0.0201519	0.0103066	0.0425302
-4.28208	-0.077259	0.00641893	0.151769	0.105174	0.0461701	-0.167486	-0.00684122	0.0680178	-0.0659511	0.000386297	-0.0105622	0.00504923	-0.0381259	-0.0113542	0.0249325	0.00968359	-0.00154615	0.0266448	-0.0329636	0.0201612	0.0102965	0.0425225
-4.2816	-0.0772421	0.00645639	0.151752	0.105141	0.0462107	-0.167536	-0.00682558	0.0680274	-0.06593	0.000419042	-0.0105304	0.00505952	-0.0381179	-0.0113332	0.0249603	0.00967933	-0.00154132	0.0266545	-0.0329488	0.0201705	0.0102864	0.0425147
-4.28112	-0.0772252	0.00649385	0.151735	0.105109	0.0462514	-0.167587	-0.00680994	0.068037	-0.0659088	0.000451795	-0.0104987	0.00506986	-0.0381099	-0.0113121	0.0249881	0.00967507	-0.00153649	0.0266642	-0.0329339	0.0201798	0.0102763	0.042507
-4.28064	-0.0772084	0.00653132	0.151718	0.105076	0.046292	-0.167638	-0.0067943	0.0680467	-0.0658877	0.000484525	-0.010467	0.0050802	-0.0381019	-0.011291	0.0250159	0.00967083	-0.00153165	0.0266739	-0.032919	0.0201891	0.0102661	0.0424993
-4.28016	-0.0771916	0.00656878	0.151701	0.105043	0.0463326	-0.167688	-0.00677868	0.0680563	-0.0658666	0.00051726	-0.0104353	0.00509057	-0.0380939	-0.0112699	0.0250436	0.0096666	-0.00152679	0.0266836	-0.0329042	0.0201984	0.010256	0.0424915
-4.27968	-0.0771747	0.00660624	0.151684	0.10501	0.0463732	-0.167739	-0.00676306	0.068066	-0.0658455	0.000549982	-0.0104035	0.00510094	-0.0380859	-0.0112488	0.0250714	0.00966237	-0.00152193	0.0266933	-0.0328893	0.0202077	0.0102458	0.0424838
-4.2792	-0.0771578	0.0066437	0.151667	0.104977	0.0464138	-0.16779	-0.00674746	0.0680756	-0.0658244	0.000582701	-0.0103718	0.00511134	-0.0380779	-0.0112277	0.0250992	0.00965816	-0.00151708	0.0267031	-0.0328744	0.020217	0.0102356	0.042476
-4.27872	-0.0771409	0.00668117	0.15165	0.104944	0.0464544	-0.167841	-0.00673185	0.0680852	-0.0658033	0.000615433	-0.0103401	0.00512175	-0.0380699	-0.0112065	0.025127	0.00965396	-0.00151221	0.0267128	-0.0328596	0.0202264	0.0102254	0.0424683
-4.27824	-0.077124	0.00671863	0.151633	0.104911	0.046495	-0.167892	-0.00671628	0.0680948	-0.0657822	0.000648142	-0.0103084	0.00513219	-0.0380619	-0.0111853	0.0251549	0.00964976	-0.00150734	0.0267226	-0.0328447	0.0202358	0.0102152	0.0424605
-4.27776	-0.077107	0.00675611	0.151616	0.104878	0.0465356	-0.167943	-0.0067007	0.0681045	-0.0657612	0.000680852	-0.0102766	0.00514262	-0.0380539	-0.0111641	0.0251827	0.00964557	-0.00150246	0.0267324	-0.0328299	0.0202452	0.010205	0.0424528
-4.27728	-0.0770899	0.00679356	0.151598	0.104845	0.0465761	-0.167994	-0.00668512	0.0681141	-0.0657401	0.000713547	-0.0102449	0.00515308	-0.0380459	-0.0111428	0.0252105	0.00964139	-0.00149758	0.0267422	-0.032815	0.0202545	0.0101947	0.042445
-4.2768	-0.0770729	0.00683102	0.151581	0.104812	0.0466167	-0.168045	-0.00666955	0.0681238	-0.065719	0.000746259	-0.0102132	0.00516356	-0.038038	-0.0111216	0.0252384	0.00963722	-0.00149268	0.026752	-0.0328002	0.0202639	0.0101844	0.0424372
-4.27632	-0.0770557	0.00686847	0.151564	0.104779	0.0466572	-0.168096	-0.006654	0.0681334	-0.065698	0.000778952	-0.0101815	0.00517406	-0.03803	-0.0111003	0.0252663	0.00963306	-0.00148778	0.0267618	-0.0327853	0.0202734	0.0101742	0.0424295
-4.27584	-0.0770386	0.00690591	0.151547	0.104746	0.0466977	-0.168147	-0.00663846	0.068143	-0.0656769	0.00081165	-0.0101498	0.00518457	-0.038022	-0.0110789	0.0252941	0.00962891	-0.00148288	0.0267717	-0.0327705	0.0202828	0.0101639	0.0424217
-4.27536	-0.0770213	0.00694335	0.151529	0.104712	0.0467383	-0.168198	-0.00662294	0.0681526	-0.0656559	0.000844327	-0.0101181	0.00519512	-0.038014	-0.0110576	0.025322	0.00962476	-0.00147797	0.0267815	-0.0327556	0.0202922	0.0101536	0.0424139
-4.27488	-0.0770041	0.00698078	0.151512	0.104679	0.0467788	-0.168249	-0.00660742	0.0681623	-0.0656348	0.000877024	-0.0100864	0.0052057	-0.038006	-0.0110362	0.0253499	0.00962062	-0.00147306	0.0267914	-0.0327407	0.0203017	0.0101432	0.0424061
-4.2744	-0.0769868	0.00701822	0.151494	0.104646	0.0468193	-0.1683	-0.00659193	0.0681719	-0.0656138	0.0009097	-0.0100547	0.00521629	-0.037998	-0.0110148	0.0253778	0.00961649	-0.00146814	0.0268013	-0.0327258	0.0203112	0.0101329	0.0423983
-4.27392	-0.0769695	0.00705566	0.151477	0.104612	0.0468597	-0.168351	-0.00657641	0.0681815	-0.0655928	0.000942369	-0.010023	0.00522689	-0.0379901	-0.0109934	0.0254057	0.00961237	-0.00146323	0.0268112	-0.032711	0.0203207	0.0101226	0.0423905
-4.27344	-0.0769522	0.00709308	0.151459	0.104579	0.0469002	-0.168402	-0.00656093	0.0681911	-0.0655717	0.000975032	-0.00999135	0.00523754	-0.0379821	-0.0109719	0.0254336	0.00960826	-0.00145831	0.0268211	-0.0326961	0.0203302	0.0101122	0.0423827
-4.27296	-0.0769348	0.0071305	0.151442	0.104545	0.0469407	-0.168454	-0.00654543	0.0682008	-0.0655507	0.0010077	-0.00995964	0.00524818	-0.0379741	-0.0109505	0.0254616	0.00960417	-0.00145338	0.026831	-0.0326813	0.0203397	0.0101018	0.0423749
-4.27248	-0.0769175	0.00716792	0.151424	0.104512	0.0469811	-0.168505	-0.00652994	0.0682104	-0.0655297	0.00104036	-0.00992798	0.00525889	-0.0379662	-0.010929	0.0254895	0.00960008	-0.00144845	0.026841	-0.0326665	0.0203492	0.0100914	0.0423671
-4.272	-0.0769002	0.00720534	0.151406	0.104478	0.0470215	-0.168556	-0.00651446	0.06822	-0.0655087	0.00107302	-0.00989627	0.00526959	-0.0379582	-0.0109075	0.0255174	0.00959599	-0.00144351	0.0268509	-0.0326516	0.0203588	0.010081	0.0423592
-4.27152	-0.0768829	0.00724273	0.151389	0.104445	0.0470619	-0.168608	-0.00649898	0.0682297	-0.0654877	0.00110567	-0.00986459	0.00528033	-0.0379502	-0.010886	0.0255454	0.00959191	-0.00143857	0.0268609	-0.0326368	0.0203683	0.0100706	0.0423514
-4.27104	-0.0768656	0.00728015	0.151371	0.104411	0.0471023	-0.168659	-0.00648349	0.0682393	-0.0654666	0.00113832	-0.00983284	0.00529105	-0.0379423	-0.0108644	0.0255733	0.00958781	-0.00143362	0.0268709	-0.032622	0.0203779	0.0100602	0.0423436
-4.27056	-0.0768483	0.00731754	0.151353	0.104378	0.0471427	-0.16871	-0.00646802	0.0682489	-0.0654456	0.00117096	-0.00980117	0.00530181	-0.0379343	-0.0108429	0.0256013	0.00958373	-0.00142866	0.0268809	-0.0326072	0.0203875	0.0100497	0.0423357
-4.27008	-0.0768311	0.00735496	0.151335	0.104344	0.0471831	-0.168762	-0.00645253	0.0682586	-0.0654246	0.00120361	-0.00976946	0.00531256	-0.0379263	-0.0108213	0.0256293	0.00957965	-0.0014237	0.0268909	-0.0325924	0.0203972	0.0100393	0.0423279
-4.2696	-0.0768139	0.00739236	0.151318	0.10431	0.0472235	-0.168813	-0.00643706	0.0682682	-0.0654036	0.00123624	-0.00973777	0.00532336	-0.0379184	-0.0107997	0.0256573	0.00957559	-0.00141874	0.026901	-0.0325776	0.0204068	0.0100288	0.0423201
-4.26912	-0.0767967	0.00742978	0.1513	0.104276	0.0472639	-0.168865	-0.0064216	0.0682779	-0.0653826	0.00126888	-0.00970608	0.00533417	-0.0379104	-0.0107781	0.0256852	0.00957154	-0.00141377	0.026911	-0.0325628	0.0204165	0.0100183	0.0423122
-4.26864	-0.0767795	0.0074672	0.151282	0.104242	0.0473042	-0.168916	-0.00640615	0.0682875	-0.0653616	0.00130148	-0.0096744	0.00534502	-0.0379025	-0.0107565	0.0257132	0.00956748	-0.0014088	0.026921	-0.032548	0.0204262	0.0100078	0.0423044
-4.26816	-0.0767622	0.00750461	0.151264	0.104208	0.0473445	-0.168968	-0.00639068	0.0682971	-0.0653406	0.00133411	-0.0096427	0.00535586	-0.0378945	-0.0107348	0.0257412	0.00956343	-0.00140382	0.0269311	-0.0325332	0.0204359	0.00999733	0.0422965
-4.26768	-0.076745	0.00754203	0.151246	0.104175	0.0473849	-0.169019	-0.00637523	0.0683068	-0.0653196	0.00136671	-0.00961104	0.00536679	-0.0378866	-0.0107132	0.0257692	0.00955939	-0.00139884	0.0269412	-0.0325185	0.0204456	0.00998682	0.0422887
-4.2672	-0.0767278	0.00757947	0.151228	0.104141	0.0474252	-0.169071	-0.00635981	0.0683164	-0.0652986	0.00139932	-0.00957939	0.00537775	-0.0378786	-0.0106915	0.0257972	0.00955535	-0.00139385	0.0269513	-0.0325037	0.0204554	0.00997627	0.0422808
-4.26672	-0.0767106	0.0076169	0.15121	0.104107	0.0474655	-0.169123	-0.00634439	0.0683261	-0.0652776	0.00143189	-0.00954775	0.00538874	-0.0378707	-0.0106697	0.0258252	0.00955131	-0.00138885	0.0269614	-0.0324889	0.0204651	0.00996571	0.0422729
-4.26624	-0.0766935	0.00765435	0.151192	0.104072	0.0475057	-0.169174	-0.00632897	0.0683357	-0.0652566	0.00146447	-0.00951612	0.00539977	-0.0378627	-0.010648	0.0258532	0.00954729	-0.00138385	0.0269715	-0.0324742	0.0204749	0.00995516	0.042265
-4.26576	-0.0766764	0.00769179	0.151173	0.104038	0.047546	-0.169226	-0.00631355	0.0683454	-0.0652356	0.00149703	-0.00948455	0.00541084	-0.0378548	-0.0106262	0.0258812	0.00954327	-0.00137885	0.0269816	-0.0324595	0.0204847	0.00994457	0.0422571
-4.26528	-0.0766594	0.00772924	0.151155	0.104004	0.0475863	-0.169278	-0.00629817	0.068355	-0.0652146	0.00152959	-0.00945297	0.00542195	-0.0378468	-0.0106044	0.0259092	0.00953926	-0.00137383	0.0269917	-0.0324447	0.0204945	0.00993398	0.0422492
-4.2648	-0.0766423	0.0077667	0.151137	0.10397	0.0476265	-0.169329	-0.00628277	0.0683647	-0.0651936	0.00156212	-0.00942145	0.0054331	-0.0378388	-0.0105826	0.0259372	0.00953525	-0.00136882	0.0270019	-0.03243	0.0205043	0.00992336	0.0422413
-4.26432	-0.0766253	0.00780416	0.151119	0.103936	0.0476667	-0.169381	-0.00626739	0.0683743	-0.0651726	0.00159466	-0.00938987	0.00544431	-0.0378309	-0.0105608	0.0259653	0.00953125	-0.00136379	0.027012	-0.0324153	0.0205141	0.00991275	0.0422334
-4.26384	-0.0766082	0.00784163	0.1511	0.103902	0.0477069	-0.169433	-0.006252	0.068384	-0.0651516	0.00162716	-0.00935839	0.00545554	-0.0378229	-0.0105389	0.0259933	0.00952724	-0.00135876	0.0270222	-0.0324005	0.020524	0.0099021	0.0422255
-4.26336	-0.0765912	0.00787911	0.151082	0.103867	0.0477472	-0.169485	-0.00623665	0.0683937	-0.0651306	0.00165967	-0.00932686	0.00546683	-0.0378149	-0.010517	0.0260213	0.00952324	-0.00135371	0.0270324	-0.0323858	0.0205338	0.00989145	0.0422175
-4.26288	-0.0765742	0.00791659	0.151064	0.103833	0.0477873	-0.169537	-0.00622129	0.0684033	-0.0651096	0.00169215	-0.00929544	0.00547816	-0.037807	-0.0104951	0.0260493	0.00951924	-0.00134866	0.0270426	-0.0323711	0.0205437	0.00988078	0.0422096
-4.2624	-0.0765572	0.00795406	0.151045	0.103799	0.0478275	-0.169588	-0.00620595	0.068413	-0.0650886	0.00172465	-0.00926396	0.00548954	-0.037799	-0.0104731	0.0260774	0.00951525	-0.00134361	0.0270528	-0.0323564	0.0205536	0.00987009	0.0422017
-4.26192	-0.0765402	0.00799155	0.151027	0.103764	0.0478677	-0.16964	-0.00619062	0.0684227	-0.0650676	0.00175711	-0.00923253	0.00550099	-0.037791	-0.0104512	0.0261054	0.00951126	-0.00133855	0.027063	-0.0323417	0.0205635	0.0098594	0.0421937
-4.26144	-0.0765233	0.00802902	0.151008	0.10373	0.0479078	-0.169692	-0.0061753	0.0684323	-0.0650466	0.00178957	-0.00920113	0.00551246	-0.037783	-0.0104291	0.0261334	0.00950727	-0.00133348	0.0270732	-0.0323269	0.0205735	0.0098487	0.0421857
-4.26096	-0.0765063	0.00806649	0.150989	0.103696	0.0479479	-0.169744	-0.00616	0.068442	-0.0650256	0.00182202	-0.00916971	0.005524	-0.0377751	-0.0104071	0.0261614	0.00950328	-0.0013284	0.0270835	-0.0323122	0.0205834	0.00983799	0.0421777
-4.26048	-0.0764894	0.00810396	0.150971	0.103661	0.0479881	-0.169796	-0.0061447	0.0684517	-0.0650046	0.00185448	-0.00913834	0.00553555	-0.037767	-0.010385	0.0261895	0.00949931	-0.00132332	0.0270937	-0.0322975	0.0205934	0.00982725	0.0421697
-4.26	-0.0764725	0.00814145	0.150952	0.103627	0.0480282	-0.169848	-0.0061294	0.0684613	-0.0649836	0.00188692	-0.00910697	0.00554717	-0.0377591	-0.0103629	0.0262175	0.00949534	-0.00131823	0.027104	-0.0322828	0.0206034	0.00981652	0.0421617
-4.25952	-0.0764556	0.00817891	0.150933	0.103592	0.0480682	-0.1699	-0.00611411	0.068471	-0.0649626	0.00191936	-0.00907563	0.00555881	-0.037751	-0.0103408	0.0262455	0.00949138	-0.00131311	0.0271143	-0.0322681	0.0206134	0.00980576	0.0421537
-4.25904	-0.0764388	0.00821638	0.150914	0.103558	0.0481083	-0.169952	-0.00609882	0.0684807	-0.0649416	0.00195179	-0.00904431	0.00557054	-0.0377431	-0.0103186	0.0262736	0.00948742	-0.001308	0.0271246	-0.0322534	0.0206234	0.009795	0.0421457
-4.25856	-0.0764219	0.00825384	0.150896	0.103523	0.0481484	-0.170004	-0.00608356	0.0684904	-0.0649206	0.00198423	-0.00901297	0.00558227	-0.037735	-0.0102965	0.0263016	0.00948348	-0.00130289	0.0271349	-0.0322387	0.0206334	0.0097842	0.0421376
-4.25808	-0.076405	0.0082913	0.150877	0.103489	0.0481884	-0.170056	-0.00606829	0.0685	-0.0648996	0.00201665	-0.00898169	0.00559408	-0.037727	-0.0102743	0.0263296	0.00947954	-0.00129778	0.0271453	-0.0322241	0.0206434	0.00977341	0.0421296
-4.2576	-0.0763882	0.00832875	0.150858	0.103454	0.0482284	-0.170108	-0.00605302	0.0685097	-0.0648786	0.00204908	-0.0089504	0.00560592	-0.037719	-0.010252	0.0263577	0.00947561	-0.00129264	0.0271557	-0.0322094	0.0206535	0.0097626	0.0421215
-4.25712	-0.0763714	0.00836618	0.150839	0.103419	0.0482684	-0.17016	-0.00603777	0.0685194	-0.0648576	0.00208148	-0.00891913	0.00561783	-0.037711	-0.0102298	0.0263857	0.00947168	-0.0012875	0.027166	-0.0321947	0.0206636	0.00975178	0.0421135
-4.25664	-0.0763545	0.00840362	0.15082	0.103385	0.0483084	-0.170213	-0.0060225	0.0685291	-0.0648366	0.00211391	-0.00888782	0.00562976	-0.037703	-0.0102075	0.0264137	0.00946777	-0.00128236	0.0271764	-0.03218	0.0206737	0.00974094	0.0421054
-4.25616	-0.0763378	0.00844105	0.150801	0.10335	0.0483484	-0.170265	-0.00600725	0.0685388	-0.0648157	0.00214632	-0.0088566	0.00564177	-0.037695	-0.0101852	0.0264417	0.00946386	-0.00127721	0.0271868	-0.0321654	0.0206838	0.0097301	0.0420973
-4.25568	-0.0763209	0.00847849	0.150781	0.103315	0.0483884	-0.170317	-0.00599201	0.0685485	-0.0647947	0.00217874	-0.00882533	0.00565378	-0.037687	-0.0101629	0.0264698	0.00945995	-0.00127205	0.0271972	-0.0321507	0.0206939	0.00971925	0.0420892
-4.2552	-0.0763041	0.00851594	0.150762	0.103281	0.0484284	-0.170369	-0.00597677	0.0685582	-0.0647737	0.00221114	-0.0087941	0.00566587	-0.037679	-0.0101406	0.0264978	0.00945605	-0.00126689	0.0272076	-0.032136	0.0207041	0.00970836	0.0420811
-4.25472	-0.0762874	0.00855338	0.150743	0.103246	0.0484683	-0.170421	-0.00596153	0.0685679	-0.0647527	0.00224357	-0.00876285	0.00567799	-0.0376709	-0.0101183	0.0265258	0.00945215	-0.00126171	0.0272181	-0.0321214	0.0207142	0.00969747	0.042073
-4.25424	-0.0762707	0.00859083	0.150724	0.103211	0.0485082	-0.170473	-0.00594631	0.0685776	-0.0647317	0.00227595	-0.00873163	0.00569016	-0.0376629	-0.010096	0.0265539	0.00944825	-0.00125654	0.0272285	-0.0321067	0.0207244	0.00968657	0.0420648
-4.25376	-0.076254	0.00862827	0.150704	0.103176	0.0485482	-0.170525	-0.00593108	0.0685872	-0.0647106	0.00230836	-0.0087004	0.00570237	-0.0376549	-0.0100736	0.0265819	0.00944435	-0.00125134	0.027239	-0.0320921	0.0207346	0.00967563	0.0420567
-4.25328	-0.0762372	0.0086657	0.150685	0.103142	0.0485881	-0.170578	-0.00591586	0.068597	-0.0646897	0.00234076	-0.00866921	0.00571463	-0.0376468	-0.0100512	0.0266099	0.00944045	-0.00124614	0.0272494	-0.0320775	0.0207448	0.00966472	0.0420485
-4.2528	-0.0762206	0.00870314	0.150666	0.103107	0.0486279	-0.17063	-0.00590064	0.0686067	-0.0646686	0.00237316	-0.00863799	0.00572691	-0.0376388	-0.0100288	0.0266379	0.00943655	-0.00124093	0.0272599	-0.0320629	0.020755	0.00965376	0.0420404
-4.25232	-0.0762039	0.00874057	0.150646	0.103072	0.0486678	-0.170682	-0.00588545	0.0686164	-0.0646477	0.00240555	-0.00860682	0.00573927	-0.0376308	-0.0100064	0.026666	0.00943266	-0.00123571	0.0272704	-0.0320482	0.0207652	0.00964281	0.0420322
-4.25184	-0.0761872	0.008778	0.150627	0.103037	0.0487077	-0.170734	-0.00587025	0.0686261	-0.0646267	0.00243793	-0.00857561	0.00575167	-0.0376227	-0.00998396	0.026694	0.00942876	-0.00123048	0.0272809	-0.0320336	0.0207754	0.00963185	0.042024
-4.25136	-0.0761705	0.00881545	0.150607	0.103002	0.0487475	-0.170786	-0.00585507	0.0686358	-0.0646057	0.00247032	-0.0085445	0.00576411	-0.0376147	-0.00996151	0.026722	0.00942487	-0.00122523	0.0272913	-0.032019	0.0207856	0.00962086	0.0420158
-4.25088	-0.0761539	0.00885289	0.150587	0.102967	0.0487874	-0.170838	-0.00583989	0.0686455	-0.0645847	0.00250271	-0.00851331	0.00577661	-0.0376066	-0.00993904	0.02675	0.00942097	-0.00121999	0.0273018	-0.0320045	0.0207959	0.00960984	0.0420076
-4.2504	-0.0761373	0.00889033	0.150568	0.102932	0.0488272	-0.170891	-0.00582473	0.0686552	-0.0645637	0.00253509	-0.00848219	0.00578917	-0.0375986	-0.00991655	0.0267781	0.00941707	-0.00121472	0.0273123	-0.0319899	0.0208061	0.00959884	0.0419994
-4.24992	-0.0761207	0.00892777	0.150548	0.102897	0.048867	-0.170943	-0.00580958	0.0686649	-0.0645427	0.00256745	-0.00845103	0.00580174	-0.0375905	-0.00989403	0.0268061	0.00941319	-0.00120945	0.0273228	-0.0319753	0.0208164	0.00958781	0.0419912
-4.24944	-0.0761041	0.00896521	0.150528	0.102862	0.0489068	-0.170995	-0.00579444	0.0686747	-0.0645217	0.00259982	-0.00841993	0.00581441	-0.0375824	-0.0098715	0.0268341	0.00940931	-0.00120417	0.0273334	-0.0319608	0.0208266	0.00957678	0.0419829
-4.24896	-0.0760875	0.00900265	0.150509	0.102827	0.0489466	-0.171047	-0.00577931	0.0686844	-0.0645007	0.00263218	-0.00838878	0.0058271	-0.0375744	-0.00984894	0.0268621	0.00940543	-0.00119887	0.0273439	-0.0319462	0.0208369	0.00956572	0.0419747
-4.24848	-0.0760709	0.00904008	0.150489	0.102791	0.0489864	-0.1711	-0.00576419	0.0686942	-0.0644798	0.00266454	-0.0083577	0.00583987	-0.0375663	-0.00982636	0.0268902	0.00940154	-0.00119356	0.0273544	-0.0319317	0.0208472	0.00955467	0.0419664
-4.248	-0.0760543	0.00907752	0.150469	0.102756	0.0490261	-0.171152	-0.00574908	0.0687039	-0.0644588	0.00269689	-0.00832655	0.00585266	-0.0375582	-0.00980374	0.0269182	0.00939767	-0.00118824	0.0273649	-0.0319172	0.0208574	0.00954359	0.0419582
-4.24752	-0.0760376	0.00911495	0.150449	0.102721	0.0490659	-0.171204	-0.00573399	0.0687136	-0.0644378	0.00272924	-0.00829546	0.0058655	-0.0375501	-0.0097811	0.0269462	0.00939379	-0.00118292	0.0273755	-0.0319027	0.0208677	0.00953251	0.0419499
-4.24704	-0.0760211	0.00915236	0.150429	0.102686	0.0491056	-0.171257	-0.00571891	0.0687234	-0.0644168	0.00276157	-0.00826433	0.00587837	-0.037542	-0.00975843	0.0269742	0.00938993	-0.00117758	0.027386	-0.0318882	0.020878	0.0095214	0.0419417
-4.24656	-0.0760045	0.00918978	0.150409	0.10265	0.0491453	-0.171309	-0.00570386	0.0687331	-0.0643958	0.00279391	-0.00823323	0.0058913	-0.0375339	-0.00973576	0.0270022	0.00938604	-0.00117222	0.0273966	-0.0318737	0.0208883	0.0095103	0.0419334
-4.24608	-0.075988	0.00922717	0.150389	0.102615	0.049185	-0.171361	-0.0056888	0.0687429	-0.0643748	0.00282626	-0.00820212	0.00590423	-0.0375258	-0.00971302	0.0270302	0.00938218	-0.00116687	0.0274071	-0.0318592	0.0208986	0.00949918	0.0419251
-4.2456	-0.0759716	0.00926456	0.150369	0.10258	0.0492247	-0.171414	-0.00567378	0.0687526	-0.0643539	0.00285858	-0.00817106	0.0059172	-0.0375177	-0.00969028	0.0270582	0.0093783	-0.0011615	0.0274177	-0.0318447	0.0209089	0.00948807	0.0419168
-4.24512	-0.0759551	0.00930192	0.150349	0.102544	0.0492644	-0.171466	-0.00565877	0.0687624	-0.0643328	0.00289091	-0.00813992	0.00593019	-0.0375096	-0.0096675	0.0270862	0.00937444	-0.00115612	0.0274283	-0.0318302	0.0209193	0.00947692	0.0419085
-4.24464	-0.0759387	0.0093393	0.150328	0.102509	0.0493041	-0.171519	-0.00564377	0.0687721	-0.0643119	0.00292322	-0.00810887	0.00594324	-0.0375014	-0.00964471	0.0271142	0.00937057	-0.00115072	0.0274389	-0.0318158	0.0209296	0.00946578	0.0419002
-4.24416	-0.0759223	0.00937667	0.150308	0.102473	0.0493437	-0.171571	-0.0056288	0.0687819	-0.0642909	0.00295553	-0.00807778	0.00595627	-0.0374933	-0.00962187	0.0271422	0.00936672	-0.00114532	0.0274495	-0.0318013	0.0209399	0.0094546	0.0418918
-4.24368	-0.0759058	0.00941403	0.150288	0.102438	0.0493834	-0.171624	-0.00561383	0.0687917	-0.0642699	0.00298784	-0.00804674	0.00596936	-0.0374851	-0.00959902	0.0271701	0.00936285	-0.00113991	0.0274601	-0.0317868	0.0209503	0.00944343	0.0418835
-4.2432	-0.0758895	0.00945137	0.150268	0.102402	0.049423	-0.171676	-0.00559889	0.0688014	-0.0642489	0.00302014	-0.00801566	0.00598244	-0.037477	-0.00957612	0.0271981	0.00935899	-0.00113449	0.0274707	-0.0317724	0.0209606	0.00943226	0.0418752
-4.24272	-0.0758731	0.0094887	0.150247	0.102366	0.0494626	-0.171729	-0.00558397	0.0688112	-0.0642278	0.00305245	-0.00798464	0.00599558	-0.0374688	-0.00955318	0.027226	0.00935513	-0.00112906	0.0274813	-0.0317579	0.020971	0.00942104	0.0418668
-4.24224	-0.0758568	0.00952604	0.150227	0.102331	0.0495022	-0.171781	-0.00556907	0.068821	-0.0642068	0.00308475	-0.00795357	0.00600873	-0.0374607	-0.00953023	0.027254	0.00935127	-0.00112361	0.0274919	-0.0317435	0.0209813	0.00940983	0.0418585
-4.24176	-0.0758404	0.00956337	0.150207	0.102295	0.0495418	-0.171834	-0.00555417	0.0688307	-0.0641858	0.00311704	-0.0079226	0.00602192	-0.0374525	-0.00950723	0.0272819	0.0093474	-0.00111816	0.0275026	-0.031729	0.0209917	0.0093986	0.0418501
-4.24128	-0.0758241	0.00960067	0.150186	0.10226	0.0495814	-0.171887	-0.00553931	0.0688405	-0.0641648	0.00314933	-0.00789153	0.0060351	-0.0374444	-0.00948422	0.0273099	0.00934354	-0.0011127	0.0275132	-0.0317146	0.021002	0.00938735	0.0418418
-4.2408	-0.0758077	0.00963797	0.150166	0.102224	0.049621	-0.171939	-0.00552446	0.0688503	-0.0641438	0.00318162	-0.00786054	0.00604833	-0.0374362	-0.00946117	0.0273378	0.00933969	-0.00110723	0.0275239	-0.0317002	0.0210124	0.0093761	0.0418334
-4.24032	-0.0757913	0.00967526	0.150145	0.102189	0.0496605	-0.171992	-0.00550963	0.0688601	-0.0641228	0.00321391	-0.00782951	0.00606157	-0.0374281	-0.00943811	0.0273657	0.00933584	-0.00110175	0.0275345	-0.0316858	0.0210228	0.00936483	0.041825
-4.23984	-0.075775	0.00971254	0.150124	0.102153	0.0497001	-0.172045	-0.00549482	0.0688699	-0.0641018	0.00324619	-0.00779856	0.00607488	-0.0374199	-0.00941503	0.0273937	0.00933198	-0.00109627	0.0275452	-0.0316713	0.0210332	0.00935355	0.0418166
-4.23936	-0.0757587	0.00974981	0.150104	0.102117	0.0497396	-0.172098	-0.00548002	0.0688797	-0.0640808	0.00327846	-0.00776754	0.00608817	-0.0374117	-0.00939192	0.0274216	0.00932814	-0.00109077	0.0275559	-0.031657	0.0210436	0.00934225	0.0418082
-4.23888	-0.0757423	0.00978706	0.150083	0.102081	0.0497791	-0.172151	-0.00546526	0.0688895	-0.0640597	0.00331074	-0.00773657	0.00610151	-0.0374036	-0.00936879	0.0274495	0.00932431	-0.00108526	0.0275667	-0.0316425	0.021054	0.00933093	0.0417998
-4.2384	-0.0757259	0.0098243	0.150062	0.102046	0.0498186	-0.172204	-0.0054505	0.0688993	-0.0640387	0.00334302	-0.00770558	0.00611488	-0.0373954	-0.00934564	0.0274775	0.00932047	-0.00107975	0.0275774	-0.0316281	0.0210644	0.00931963	0.0417914
-4.23792	-0.0757096	0.00986152	0.150042	0.10201	0.0498581	-0.172257	-0.00543577	0.0689091	-0.0640177	0.00337528	-0.00767463	0.00612828	-0.0373872	-0.00932247	0.0275054	0.00931664	-0.00107424	0.0275881	-0.0316137	0.0210748	0.00930828	0.041783
-4.23744	-0.0756932	0.00989871	0.150021	0.101974	0.0498976	-0.17231	-0.00542103	0.0689189	-0.0639967	0.00340753	-0.00764365	0.0061417	-0.037379	-0.00929926	0.0275333	0.00931282	-0.00106871	0.0275988	-0.0315994	0.0210852	0.00929694	0.0417745
-4.23696	-0.0756769	0.0099359	0.15	0.101938	0.049937	-0.172363	-0.00540632	0.0689287	-0.0639757	0.00343978	-0.00761272	0.00615514	-0.0373708	-0.00927605	0.0275612	0.00930899	-0.00106318	0.0276096	-0.031585	0.0210957	0.00928558	0.0417661
-4.23648	-0.0756605	0.00997306	0.149979	0.101902	0.0499765	-0.172415	-0.0053916	0.0689385	-0.0639546	0.00347203	-0.00758174	0.00616859	-0.0373626	-0.00925282	0.0275892	0.00930517	-0.00105765	0.0276203	-0.0315706	0.0211061	0.00927419	0.0417577
-4.236	-0.0756442	0.0100102	0.149958	0.101866	0.0500159	-0.172469	-0.00537693	0.0689483	-0.0639336	0.00350427	-0.00755083	0.00618205	-0.0373544	-0.00922957	0.027617	0.00930136	-0.0010521	0.0276311	-0.0315562	0.0211166	0.00926281	0.0417492
-4.23552	-0.0756278	0.0100473	0.149937	0.10183	0.0500554	-0.172522	-0.00536225	0.0689582	-0.0639125	0.00353651	-0.0075199	0.00619556	-0.0373462	-0.0092063	0.027645	0.00929755	-0.00104656	0.0276418	-0.0315418	0.021127	0.00925142	0.0417407
-4.23504	-0.0756114	0.0100845	0.149916	0.101794	0.0500948	-0.172575	-0.0053476	0.068968	-0.0638914	0.00356874	-0.00748899	0.00620909	-0.037338	-0.00918302	0.0276729	0.00929375	-0.001041	0.0276526	-0.0315275	0.0211375	0.00923999	0.0417323
-4.23456	-0.075595	0.0101216	0.149895	0.101758	0.0501342	-0.172628	-0.00533295	0.0689779	-0.0638704	0.00360095	-0.00745806	0.00622266	-0.0373298	-0.00915974	0.0277008	0.00928996	-0.00103544	0.0276634	-0.0315131	0.021148	0.00922858	0.0417238
-4.23408	-0.0755786	0.0101586	0.149874	0.101722	0.0501736	-0.172681	-0.00531834	0.0689877	-0.0638493	0.00363318	-0.0074272	0.00623623	-0.0373216	-0.00913644	0.0277287	0.00928617	-0.00102988	0.0276742	-0.0314988	0.0211585	0.00921715	0.0417153
-4.2336	-0.0755622	0.0101957	0.149853	0.101686	0.050213	-0.172734	-0.00530373	0.0689976	-0.0638282	0.00366539	-0.00739626	0.00624984	-0.0373134	-0.00911311	0.0277566	0.00928239	-0.00102431	0.0276849	-0.0314844	0.021169	0.00920568	0.0417068
-4.23312	-0.0755458	0.0102328	0.149832	0.10165	0.0502523	-0.172787	-0.00528914	0.0690074	-0.0638072	0.0036976	-0.00736536	0.00626349	-0.0373052	-0.00908977	0.0277844	0.00927863	-0.00101874	0.0276957	-0.0314701	0.0211795	0.00919423	0.0416983
-4.23264	-0.0755294	0.0102698	0.149811	0.101613	0.0502917	-0.17284	-0.00527457	0.0690173	-0.0637861	0.00372978	-0.00733447	0.00627717	-0.037297	-0.00906643	0.0278123	0.00927485	-0.00101316	0.0277065	-0.0314558	0.02119	0.00918274	0.0416898
-4.23216	-0.075513	0.0103069	0.14979	0.101577	0.050331	-0.172893	-0.00526002	0.0690272	-0.063765	0.00376199	-0.00730359	0.00629089	-0.0372888	-0.00904308	0.0278402	0.00927109	-0.00100758	0.0277174	-0.0314415	0.0212005	0.00917125	0.0416813
-4.23168	-0.0754966	0.0103439	0.149768	0.101541	0.0503703	-0.172946	-0.00524548	0.069037	-0.0637439	0.00379415	-0.00727271	0.00630462	-0.0372806	-0.00901972	0.027868	0.00926734	-0.001002	0.0277282	-0.0314272	0.021211	0.00915974	0.0416728
-4.2312	-0.0754802	0.0103809	0.149747	0.101504	0.0504096	-0.173	-0.00523097	0.0690469	-0.0637229	0.00382633	-0.00724185	0.00631841	-0.0372724	-0.00899633	0.0278959	0.00926359	-0.000996414	0.027739	-0.0314129	0.0212216	0.00914822	0.0416642
-4.23072	-0.0754638	0.0104179	0.149726	0.101468	0.0504489	-0.173053	-0.00521647	0.0690568	-0.0637018	0.00385849	-0.00721096	0.00633222	-0.0372642	-0.00897293	0.0279237	0.00925984	-0.000990823	0.0277498	-0.0313986	0.0212321	0.0091367	0.0416557
-4.23024	-0.0754474	0.0104548	0.149704	0.101432	0.0504882	-0.173106	-0.00520199	0.0690667	-0.0636808	0.00389065	-0.00718009	0.00634609	-0.037256	-0.00894953	0.0279516	0.0092561	-0.000985229	0.0277607	-0.0313843	0.0212427	0.00912517	0.0416471
-4.22976	-0.075431	0.0104918	0.149683	0.101395	0.0505275	-0.173159	-0.00518753	0.0690766	-0.0636597	0.00392279	-0.00714923	0.00635997	-0.0372478	-0.00892613	0.0279794	0.00925236	-0.000979629	0.0277715	-0.0313701	0.0212533	0.00911359	0.0416386
-4.22928	-0.0754146	0.0105287	0.149661	0.101359	0.0505668	-0.173212	-0.00517309	0.0690864	-0.0636387	0.00395494	-0.00711838	0.00637389	-0.0372396	-0.0089027	0.0280072	0.00924862	-0.000974028	0.0277824	-0.0313558	0.0212638	0.00910204	0.04163
-4.2288	-0.0753982	0.0105657	0.14964	0.101322	0.050606	-0.173266	-0.00515867	0.0690963	-0.0636176	0.00398706	-0.00708749	0.00638786	-0.0372314	-0.00887926	0.028035	0.00924489	-0.000968414	0.0277932	-0.0313416	0.0212744	0.00909046	0.0416215
-4.22832	-0.0753819	0.0106026	0.149618	0.101286	0.0506453	-0.173319	-0.00514428	0.0691062	-0.0635966	0.00401917	-0.00705663	0.00640185	-0.0372232	-0.00885578	0.0280627	0.00924116	-0.000962798	0.0278041	-0.0313273	0.021285	0.0090789	0.0416129
-4.22784	-0.0753655	0.0106395	0.149597	0.101249	0.0506845	-0.173372	-0.0051299	0.0691161	-0.0635756	0.00405125	-0.00702572	0.00641587	-0.0372149	-0.00883229	0.0280905	0.00923744	-0.000957184	0.027815	-0.0313131	0.0212956	0.00906731	0.0416043
-4.22736	-0.0753491	0.0106763	0.149575	0.101213	0.0507237	-0.173425	-0.00511555	0.069126	-0.0635545	0.00408335	-0.00699482	0.00642994	-0.0372067	-0.00880877	0.0281183	0.00923373	-0.000951556	0.0278259	-0.0312989	0.0213062	0.00905569	0.0415957
-4.22688	-0.0753327	0.0107132	0.149553	0.101176	0.0507629	-0.173479	-0.00510123	0.069136	-0.0635335	0.00411543	-0.00696391	0.00644403	-0.0371985	-0.00878524	0.028146	0.00923003	-0.000945929	0.0278368	-0.0312847	0.0213168	0.0090441	0.0415871
-4.2264	-0.0753163	0.0107501	0.149532	0.101139	0.0508021	-0.173532	-0.00508691	0.0691459	-0.0635125	0.00414749	-0.00693304	0.00645817	-0.0371903	-0.00876169	0.0281737	0.00922632	-0.000940299	0.0278476	-0.0312705	0.0213274	0.00903247	0.0415784
-4.22592	-0.0752999	0.0107869	0.14951	0.101103	0.0508413	-0.173585	-0.00507263	0.0691558	-0.0634914	0.00417953	-0.00690213	0.00647232	-0.037182	-0.00873813	0.0282014	0.00922261	-0.000934667	0.0278585	-0.0312563	0.021338	0.00902084	0.0415698
-4.22544	-0.0752835	0.0108237	0.149488	0.101066	0.0508805	-0.173638	-0.00505836	0.0691657	-0.0634704	0.00421159	-0.00687127	0.00648653	-0.0371738	-0.00871454	0.0282291	0.00921892	-0.000929031	0.0278694	-0.0312421	0.0213486	0.00900921	0.0415611
-4.22496	-0.0752671	0.0108605	0.149466	0.101029	0.0509196	-0.173692	-0.00504411	0.0691757	-0.0634494	0.00424361	-0.00684039	0.00650075	-0.0371656	-0.00869093	0.0282568	0.00921522	-0.000923396	0.0278803	-0.0312279	0.0213592	0.00899755	0.0415525
-4.22448	-0.0752507	0.0108973	0.149445	0.100993	0.0509588	-0.173745	-0.00502988	0.0691856	-0.0634284	0.00427564	-0.00680955	0.00651504	-0.0371574	-0.00866729	0.0282844	0.00921152	-0.00091775	0.0278912	-0.0312137	0.0213698	0.00898589	0.0415438
-4.224	-0.0752343	0.0109341	0.149423	0.100956	0.0509979	-0.173798	-0.00501567	0.0691956	-0.0634074	0.00430767	-0.00677867	0.00652937	-0.0371492	-0.00864363	0.0283121	0.00920783	-0.000912099	0.0279021	-0.0311996	0.0213805	0.00897422	0.0415351
-4.22352	-0.0752178	0.0109708	0.149401	0.100919	0.051037	-0.173852	-0.0050015	0.0692055	-0.0633864	0.00433966	-0.00674781	0.00654373	-0.037141	-0.00861994	0.0283397	0.00920415	-0.000906444	0.027913	-0.0311854	0.0213911	0.00896254	0.0415264
-4.22304	-0.0752014	0.0110076	0.149379	0.100882	0.0510762	-0.173905	-0.00498735	0.0692155	-0.0633654	0.00437166	-0.00671698	0.00655811	-0.0371327	-0.00859624	0.0283673	0.00920046	-0.000900779	0.0279239	-0.0311713	0.0214017	0.00895086	0.0415177
-4.22256	-0.0751849	0.0110443	0.149357	0.100845	0.0511153	-0.173958	-0.00497322	0.0692254	-0.0633445	0.00440365	-0.00668613	0.00657254	-0.0371245	-0.00857254	0.0283949	0.00919678	-0.000895121	0.0279348	-0.0311571	0.0214124	0.00893914	0.041509
-4.22208	-0.0751684	0.011081	0.149335	0.100808	0.0511544	-0.174011	-0.00495911	0.0692354	-0.0633235	0.00443564	-0.00665528	0.00658697	-0.0371163	-0.0085488	0.0284224	0.00919309	-0.000889458	0.0279457	-0.031143	0.021423	0.00892745	0.0415003
-4.2216	-0.075152	0.0111176	0.149313	0.100771	0.0511935	-0.174065	-0.00494503	0.0692454	-0.0633025	0.0044676	-0.00662445	0.00660146	-0.037108	-0.00852504	0.02845	0.00918942	-0.000883786	0.0279566	-0.0311288	0.0214336	0.00891574	0.0414915
-4.22112	-0.0751356	0.0111543	0.149291	0.100734	0.0512326	-0.174118	-0.00493097	0.0692553	-0.0632816	0.00449958	-0.00659363	0.00661595	-0.0370998	-0.00850124	0.0284775	0.00918575	-0.000878114	0.0279675	-0.0311147	0.0214443	0.00890399	0.0414827
-4.22064	-0.0751192	0.0111909	0.149269	0.100697	0.0512717	-0.174171	-0.00491692	0.0692653	-0.0632606	0.00453151	-0.00656285	0.00663047	-0.0370915	-0.00847744	0.028505	0.00918209	-0.000872434	0.0279785	-0.0311006	0.0214549	0.00889227	0.041474
-4.22016	-0.0751027	0.0112276	0.149247	0.10066	0.0513108	-0.174225	-0.00490289	0.0692753	-0.0632397	0.00456347	-0.00653204	0.00664502	-0.0370833	-0.00845362	0.0285325	0.00917841	-0.000866757	0.0279894	-0.0310865	0.0214656	0.00888051	0.0414652
-4.21968	-0.0750862	0.0112642	0.149225	0.100623	0.0513498	-0.174278	-0.00488889	0.0692853	-0.0632187	0.00459541	-0.00650129	0.00665962	-0.0370751	-0.00842979	0.02856	0.00917476	-0.000861073	0.0280003	-0.0310724	0.0214763	0.00886875	0.0414564
-4.2192	-0.0750697	0.0113008	0.149203	0.100586	0.0513889	-0.174331	-0.0048749	0.0692953	-0.0631978	0.00462736	-0.00647047	0.00667424	-0.0370668	-0.0084059	0.0285874	0.00917109	-0.000855387	0.0280112	-0.0310583	0.0214869	0.00885699	0.0414476
-4.21872	-0.0750532	0.0113373	0.149181	0.100549	0.0514279	-0.174385	-0.00486094	0.0693053	-0.0631768	0.00465928	-0.00643974	0.00668892	-0.0370586	-0.00838199	0.0286149	0.00916743	-0.000849699	0.0280221	-0.0310442	0.0214976	0.00884522	0.0414388
-4.21824	-0.0750367	0.0113739	0.149159	0.100512	0.051467	-0.174438	-0.00484701	0.0693153	-0.0631559	0.00469123	-0.00640891	0.00670361	-0.0370503	-0.00835804	0.0286423	0.00916377	-0.000844001	0.028033	-0.0310301	0.0215083	0.00883342	0.04143
-4.21776	-0.0750201	0.0114105	0.149137	0.100475	0.051506	-0.174491	-0.00483307	0.0693253	-0.063135	0.00472314	-0.00637818	0.00671836	-0.0370421	-0.00833408	0.0286698	0.00916013	-0.000838303	0.0280439	-0.031016	0.021519	0.00882164	0.0414211
-4.21728	-0.0750035	0.011447	0.149115	0.100438	0.0515451	-0.174545	-0.00481918	0.0693353	-0.063114	0.00475507	-0.00634742	0.00673312	-0.0370338	-0.00831009	0.0286972	0.00915649	-0.000832606	0.0280549	-0.031002	0.0215296	0.00880983	0.0414123
-4.2168	-0.074987	0.0114835	0.149092	0.1004	0.0515841	-0.174598	-0.0048053	0.0693453	-0.0630931	0.00478696	-0.00631669	0.00674794	-0.0370256	-0.00828605	0.0287245	0.00915284	-0.000826902	0.0280658	-0.0309879	0.0215403	0.00879802	0.0414034
-4.21632	-0.0749704	0.01152	0.14907	0.100363	0.0516231	-0.174652	-0.00479144	0.0693553	-0.0630722	0.00481887	-0.00628592	0.00676278	-0.0370173	-0.00826199	0.0287519	0.0091492	-0.000821206	0.0280768	-0.0309739	0.021551	0.0087862	0.0413945
-4.21584	-0.0749538	0.0115565	0.149048	0.100326	0.0516621	-0.174705	-0.00477761	0.0693653	-0.0630513	0.00485074	-0.00625519	0.00677767	-0.037009	-0.00823789	0.0287793	0.00914558	-0.0008155	0.0280877	-0.0309598	0.0215617	0.00877435	0.0413857
-4.21536	-0.0749371	0.0115929	0.149026	0.100289	0.0517011	-0.174759	-0.0047638	0.0693754	-0.0630304	0.00488263	-0.00622444	0.00679259	-0.0370008	-0.00821376	0.0288066	0.00914195	-0.000809787	0.0280987	-0.0309458	0.0215724	0.0087625	0.0413768
-4.21488	-0.0749205	0.0116294	0.149003	0.100252	0.0517401	-0.174812	-0.00475002	0.0693854	-0.0630096	0.0049145	-0.00619376	0.00680755	-0.0369925	-0.00818961	0.028834	0.00913833	-0.000804074	0.0281096	-0.0309317	0.0215831	0.00875065	0.0413679
-4.2144	-0.0749037	0.0116658	0.148981	0.100214	0.0517791	-0.174866	-0.00473627	0.0693954	-0.0629887	0.00494637	-0.00616302	0.00682254	-0.0369843	-0.00816542	0.0288613	0.00913472	-0.000798356	0.0281206	-0.0309177	0.0215938	0.00873877	0.041359
-4.21392	-0.074887	0.0117022	0.148959	0.100177	0.0518181	-0.174919	-0.00472253	0.0694055	-0.0629678	0.00497823	-0.0061323	0.00683758	-0.036976	-0.0081412	0.0288886	0.00913112	-0.000792636	0.0281315	-0.0309037	0.0216045	0.00872691	0.0413501
-4.21344	-0.0748702	0.0117386	0.148936	0.10014	0.051857	-0.174973	-0.00470883	0.0694155	-0.0629469	0.00501007	-0.00610158	0.00685266	-0.0369678	-0.00811695	0.0289159	0.00912753	-0.000786908	0.0281425	-0.0308897	0.0216153	0.00871501	0.0413411
-4.21296	-0.0748534	0.0117749	0.148914	0.100102	0.051896	-0.175026	-0.00469515	0.0694256	-0.0629261	0.00504191	-0.0060709	0.00686778	-0.0369595	-0.00809269	0.0289432	0.00912395	-0.00078118	0.0281534	-0.0308757	0.021626	0.00870313	0.0413322
-4.21248	-0.0748366	0.0118113	0.148891	0.100065	0.0519349	-0.17508	-0.0046815	0.0694356	-0.0629052	0.00507373	-0.00604016	0.00688293	-0.0369513	-0.00806838	0.0289704	0.00912039	-0.000775446	0.0281644	-0.0308618	0.0216367	0.00869122	0.0413233
-4.212	-0.0748197	0.0118476	0.148869	0.100028	0.0519739	-0.175133	-0.00466788	0.0694457	-0.0628843	0.00510554	-0.0060095	0.00689814	-0.036943	-0.00804405	0.0289977	0.00911684	-0.000769717	0.0281753	-0.0308478	0.0216474	0.00867929	0.0413143
-4.21152	-0.0748028	0.0118839	0.148847	0.0999903	0.0520128	-0.175187	-0.00465428	0.0694557	-0.0628635	0.00513735	-0.00597876	0.00691338	-0.0369348	-0.00801968	0.029025	0.00911331	-0.000763969	0.0281863	-0.0308338	0.0216581	0.00866737	0.0413053
-4.21104	-0.0747859	0.0119202	0.148824	0.0999529	0.0520517	-0.17524	-0.00464072	0.0694658	-0.0628426	0.00516915	-0.0059481	0.00692866	-0.0369265	-0.00799529	0.0290522	0.00910978	-0.000758234	0.0281972	-0.0308198	0.0216688	0.00865545	0.0412963
-4.21056	-0.0747689	0.0119565	0.148802	0.0999155	0.0520906	-0.175294	-0.00462717	0.0694759	-0.0628218	0.00520096	-0.00591734	0.00694395	-0.0369183	-0.00797086	0.0290794	0.00910627	-0.000752484	0.0282082	-0.0308059	0.0216796	0.00864348	0.0412874
-4.21008	-0.074752	0.0119927	0.148779	0.0998781	0.0521295	-0.175347	-0.00461365	0.0694859	-0.0628009	0.00523274	-0.00588664	0.00695932	-0.0369101	-0.00794642	0.0291066	0.00910278	-0.000746743	0.0282191	-0.030792	0.0216903	0.00863154	0.0412783
-4.2096	-0.0747349	0.012029	0.148757	0.0998406	0.0521684	-0.175401	-0.00460014	0.069496	-0.06278	0.00526451	-0.00585586	0.00697469	-0.0369018	-0.00792194	0.0291339	0.00909928	-0.000740984	0.0282301	-0.030778	0.021701	0.00861957	0.0412693
-4.20912	-0.0747179	0.0120652	0.148734	0.0998032	0.0522073	-0.175454	-0.00458665	0.0695061	-0.0627592	0.00529627	-0.00582517	0.00699013	-0.0368936	-0.00789744	0.029161	0.0090958	-0.00073523	0.0282411	-0.0307641	0.0217118	0.00860759	0.0412603
-4.20864	-0.0747008	0.0121014	0.148711	0.0997657	0.0522462	-0.175508	-0.00457318	0.0695162	-0.0627383	0.00532803	-0.00579439	0.00700558	-0.0368854	-0.00787293	0.0291883	0.00909233	-0.000729469	0.028252	-0.0307502	0.0217225	0.0085956	0.0412513
-4.20816	-0.0746836	0.0121376	0.148689	0.0997282	0.052285	-0.175561	-0.00455973	0.0695263	-0.0627175	0.00535977	-0.00576366	0.00702108	-0.0368772	-0.00784838	0.0292154	0.00908886	-0.000723711	0.028263	-0.0307363	0.0217332	0.0085836	0.0412422
-4.20768	-0.0746665	0.0121737	0.148666	0.0996907	0.0523239	-0.175615	-0.00454631	0.0695364	-0.0626966	0.00539152	-0.00573294	0.0070366	-0.036869	-0.00782383	0.0292426	0.00908539	-0.000717944	0.0282739	-0.0307224	0.021744	0.00857158	0.0412331
-4.2072	-0.0746492	0.0122099	0.148644	0.0996532	0.0523628	-0.175668	-0.0045329	0.0695464	-0.0626758	0.00542323	-0.00570223	0.00705218	-0.0368608	-0.00779923	0.0292698	0.00908193	-0.000712167	0.0282849	-0.0307085	0.0217547	0.00855955	0.0412241
-4.20672	-0.074632	0.012246	0.148621	0.0996156	0.0524016	-0.175722	-0.00451952	0.0695566	-0.0626549	0.00545494	-0.00567147	0.00706774	-0.0368526	-0.00777462	0.0292969	0.00907848	-0.000706394	0.0282958	-0.0306946	0.0217655	0.00854752	0.041215
-4.20624	-0.0746147	0.0122821	0.148598	0.0995781	0.0524405	-0.175775	-0.00450615	0.0695667	-0.0626341	0.00548665	-0.00564075	0.00708337	-0.0368444	-0.00775001	0.0293241	0.00907504	-0.000700615	0.0283068	-0.0306807	0.0217762	0.00853547	0.0412059
-4.20576	-0.0745974	0.0123182	0.148576	0.0995405	0.0524793	-0.175829	-0.00449281	0.0695768	-0.0626132	0.00551833	-0.00561003	0.00709902	-0.0368362	-0.00772536	0.0293512	0.00907161	-0.000694833	0.0283178	-0.0306668	0.021787	0.0085234	0.0411968
-4.20528	-0.0745801	0.0123542	0.148553	0.0995029	0.0525181	-0.175882	-0.00447947	0.0695869	-0.0625924	0.00555003	-0.00557932	0.00711469	-0.0368281	-0.00770069	0.0293784	0.00906818	-0.000689044	0.0283287	-0.030653	0.0217978	0.00851134	0.0411876
[truncated: 19,177 more rows]

## Sheet: CA3 xcorr
0	719301	521501	659105	580601	526202	525403	525101	521602	719001	520901	719103	521202	525404	719002	520701	525003	521502	521101	719303	719201	525301	525001	659101	521401	580201	580501	521302	520702	521303	521102	521304	719202
[truncated: 20,833 more rows]

[truncated: 1 more sheets: CA1 xcorr]
