# Supplementary material for: UP-DOWN states and ripples differentially modulate membrane potential dynamics across DG, CA3, and CA1 in awake mice
Source: eLife. 2022 Jul 12;11:e69596. doi: 10.7554/eLife.69596 (PMC9275824; doi:10.7554/eLife.69596)
Supplement: Figure 4—source data 1. [file elife-69596-fig4-data1.xls]

## Sheet: DG Step
0	524201	524202	523701	523302	523502	523901	523301	524203	524102	523801	524002	523401	523601	523402	523501	523702	524101	524003	524001	659202	523602	659201
-0.816	-0.0226285	-0.0126224	-0.00152949	0.00484373	-0.00376843	-0.0199308	-0.00660918	-0.00157647	0.000713714	0.00676975	0.0042738	0.00587309	-0.0143942	0.0032449	0.0059232	0.00561125	0.010837	0.00602815	0.0031934	0.00360827	-0.010644	0.00619786
-0.768	-0.0368871	-0.0148731	-0.0023354	0.00726662	-0.00417717	-0.0279445	-0.00961328	-0.00243665	-0.00315196	0.00520003	0.00346892	0.00496937	-0.0200722	-0.00253514	0.00568242	0.0103958	0.0170484	0.00719728	0.00545626	0.00757138	-0.0111381	0.0143957
-0.72	-0.0503327	-0.0143599	-0.00365321	0.00956718	-0.00364813	-0.0346597	-0.0115226	-0.00374957	-0.00863457	0.00247091	0.00117351	0.00218168	-0.0220293	-0.011302	0.00427096	0.015926	0.0237794	0.00708664	0.00819623	0.0126037	-0.00838603	0.0243524
-0.672	-0.0621661	-0.0113011	-0.004861	0.0115143	-0.00363897	-0.04042	-0.0121489	-0.00598609	-0.0153896	-0.00035143	-0.00146466	-0.00215847	-0.0234635	-0.0213598	0.0023871	0.0220104	0.0310522	0.0061825	0.0113991	0.0184492	-0.00192547	0.0346011
-0.624	-0.073557	-0.00596925	-0.00459043	0.0129845	-0.00431973	-0.045793	-0.0118511	-0.00763379	-0.0226403	-0.00384845	-0.00295982	-0.00745624	-0.0336857	-0.0312171	0.00044235	0.0286554	0.0389172	0.00491318	0.0150843	0.0250111	0.00748528	0.0447867
-0.576	-0.0846414	0.0013217	-0.00296512	0.0138917	-0.00422811	-0.0511419	-0.0113696	-0.00883055	-0.0287206	-0.00913244	-0.00222793	-0.012828	-0.0478492	-0.0394779	-0.00110461	0.0358068	0.0474353	0.00340947	0.0193149	0.032375	0.0170312	0.0558299
-0.528	-0.0952008	0.0103109	-0.00354277	0.0140794	-0.00563748	-0.0562936	-0.0115581	-0.0102566	-0.0333386	-0.0151488	0.000355309	-0.0188268	-0.0602465	-0.0451938	-0.00220895	0.0433623	0.0566471	0.00167905	0.0242013	0.0407725	0.0241872	0.0689121
-0.48	-0.105761	0.0208202	-0.00781615	0.0133886	-0.00922521	-0.0606603	-0.0127869	-0.0103984	-0.0368879	-0.0176593	0.00329352	-0.0272641	-0.0649737	-0.0481885	-0.00334715	0.05112	0.0665636	0.000199995	0.0298887	0.0504783	0.0286175	0.0837116
-0.432	-0.115318	0.0328418	-0.0120782	0.0118044	-0.0129004	-0.0631747	-0.0149298	-0.00758727	-0.0407223	-0.0159243	0.00570079	-0.0359765	-0.0703969	-0.0492689	-0.00539	0.0588425	0.0771792	-0.000557216	0.0365108	0.0617008	0.0317012	0.0994645
-0.384	-0.121156	0.0467292	-0.0131324	0.00949897	-0.013522	-0.0625921	-0.0173526	-0.00125922	-0.0426325	-0.0144011	0.00736518	-0.0392271	-0.0702845	-0.0495355	-0.00758417	0.0665306	0.0884933	-0.000594451	0.0441871	0.0745528	0.033075	0.115594
-0.336	-0.12326	0.0632211	-0.0121507	0.00673752	-0.0157329	-0.0580924	-0.0192274	0.000689432	-0.0441463	-0.0183386	0.00770925	-0.0395519	-0.0808417	-0.0489899	-0.0109425	0.0743518	0.100529	-0.000392533	0.0531317	0.0891548	0.0313699	0.130989
-0.288	-0.125016	0.0833855	-0.0107581	0.00410028	-0.0155019	-0.0490399	-0.0199768	0.00504337	-0.0452056	-0.0178537	0.00679187	-0.0401205	-0.0937007	-0.0480682	-0.0154107	0.0829803	0.113349	0.000872167	0.063778	0.10569	0.0290773	0.143955
-0.24	-0.128271	0.108396	-0.01067	0.00290663	-0.0125147	-0.0345013	-0.0192535	0.00748301	-0.0471901	-0.0152015	0.00571937	-0.0453239	-0.114881	-0.0493204	-0.0212485	0.0936904	0.127047	0.0056971	0.076807	0.124352	0.0332987	0.155999
-0.192	-0.122948	0.139138	-0.00886745	0.00555052	-0.00663392	-0.013251	-0.0160665	0.0179302	-0.0464528	-0.00524122	0.00517434	-0.0546813	-0.110096	-0.0544548	-0.0212174	0.106852	0.141701	0.0130532	0.0930666	0.145186	0.0387214	0.170414
-0.144	-0.110229	0.175946	-0.0107409	0.0164245	-0.0106166	0.0156287	-0.0066181	0.0153595	-0.0505113	-0.0119021	0.00591995	-0.0635802	-0.142605	-0.0620351	-0.0249572	0.120043	0.157352	0.0150967	0.113446	0.167806	0.0568246	0.195082
-0.096	-0.0889474	0.218298	-0.0196951	0.0429678	-0.00278336	0.0524543	0.0191213	0.0271116	-0.0434977	0.000631776	0.0158796	-0.062214	-0.11842	-0.0544995	-0.0177514	0.126048	0.17398	0.00881822	0.138634	0.191326	0.119311	0.239855
-0.048	-0.0680485	0.264346	-0.0118521	0.0930713	-0.0226293	0.0961887	0.0768186	-0.0339927	-0.0739049	-0.0782056	0.0620334	-0.0482941	-0.274525	0.0188704	-0.048812	0.110515	0.19139	0.0180331	0.168419	0.214562	0.206302	0.280474
0	0.2967	0.311224	0.186911	0.166862	0.163637	0.144009	0.177584	0.267228	0.22246	0.211098	0.184057	0.311142	0.215956	0.231721	0.240735	0.0606511	0.209186	0.19203	0.201124	0.23663	-0.170278	0.165623
0.048	0.487972	0.481862	0.331793	0.239623	0.504692	0.162025	0.285579	0.442665	0.454982	0.346396	0.257956	0.377314	0.299727	0.246504	0.38614	-0.108094	0.211645	0.228661	0.298122	0.454729	-0.466604	0.238127
0.096	0.744159	0.641402	0.548683	0.383394	1.11571	0.203799	0.558697	0.727074	0.756312	0.60201	0.417829	0.50319	0.459512	0.281859	0.64399	-0.0788152	0.215926	0.311616	0.428957	0.49786	-0.720566	0.264114
0.144	0.849634	0.707391	0.647758	0.528379	1.46872	0.259508	0.757754	0.894818	0.944999	0.867154	0.623011	0.619519	0.57452	0.333234	0.883183	-0.0328598	0.219762	0.424689	0.421981	0.516602	-0.861291	0.231087
0.192	0.836913	0.604134	0.668959	0.636232	1.69855	0.320776	0.817859	1.01568	1.07543	1.10523	0.847517	0.708349	0.642868	0.396287	1.07795	-0.140677	0.226913	0.555017	0.472878	0.422875	-1.05176	0.15682
0.24	0.912933	0.609564	0.739449	0.712442	2.01805	0.383814	0.927361	1.1829	1.20345	1.32148	1.07976	0.78483	0.723701	0.467598	1.25125	-0.237336	0.241125	0.693709	0.579321	0.421283	-1.23917	0.0732837
0.288	0.975486	0.654188	0.877269	0.782278	2.28686	0.444907	1.04672	1.36623	1.32004	1.51904	1.3069	0.852691	0.829323	0.542556	1.40184	-0.200332	0.26043	0.830843	0.630396	0.417959	-1.39784	0.0158248
0.336	0.97071	0.690764	1.03616	0.851923	2.51614	0.501387	1.14256	1.52277	1.42594	1.70969	1.51832	0.918594	0.929201	0.616571	1.54572	-0.173812	0.280078	0.958864	0.660496	0.454469	-1.63235	0.0106332
0.384	0.991674	0.667911	1.1528	0.91393	2.70098	0.552805	1.17474	1.62852	1.51169	1.89301	1.70896	0.988867	1.00959	0.68583	1.68731	-0.207209	0.296194	1.07489	0.698428	0.463811	-1.89205	0.0198958
0.432	1.06043	0.64747	1.23155	0.965673	2.87579	0.598569	1.25947	1.70337	1.56716	2.061	1.87804	1.06099	1.07463	0.747557	1.81808	-0.245604	0.306455	1.17782	0.731925	0.491718	-2.07848	-0.00758674
0.48	1.10397	0.601472	1.31259	1.00537	3.07542	0.637093	1.32542	1.77298	1.60736	2.20541	2.02745	1.12678	1.13237	0.800162	1.92745	-0.277733	0.30995	1.26678	0.744287	0.465908	-2.24634	-0.0746829
0.528	1.12093	0.566277	1.39623	1.03094	3.21062	0.666929	1.37872	1.83358	1.65125	2.31099	2.15825	1.18198	1.18649	0.842911	2.01181	-0.296928	0.306915	1.33976	0.731317	0.427487	-2.3047	-0.150757
0.576	1.14521	0.563437	1.46084	1.04105	3.29369	0.686788	1.42585	1.86705	1.69875	2.37723	2.26843	1.22595	1.23869	0.87545	2.07403	-0.298797	0.298343	1.39415	0.702424	0.372313	-2.31529	-0.21931
0.624	1.1787	0.541693	1.50242	1.03587	3.3695	0.695311	1.43446	1.88034	1.73963	2.43127	2.35391	1.25731	1.28866	0.897436	2.12188	-0.297638	0.285465	1.4271	0.671124	0.342612	-2.4101	-0.273155
0.672	1.18866	0.493242	1.53569	1.01768	3.42064	0.691392	1.44226	1.88328	1.7692	2.49464	2.41048	1.27424	1.33413	0.908307	2.16236	-0.30253	0.269508	1.43659	0.638821	0.295543	-2.46539	-0.310003
0.72	1.19248	0.440472	1.56545	0.989581	3.46827	0.674526	1.45373	1.8721	1.78723	2.54744	2.43511	1.27759	1.37263	0.908002	2.19134	-0.311751	0.251594	1.42241	0.600595	0.270344	-2.46929	-0.336239
0.768	1.2035	0.380276	1.58321	0.954933	3.45982	0.644908	1.39312	1.84152	1.7913	2.55705	2.42669	1.26979	1.40191	0.897352	2.19771	-0.319644	0.232638	1.38642	0.558723	0.254845	-2.47786	-0.364606
0.816	1.20633	0.337927	1.58072	0.917234	3.39578	0.603779	1.29447	1.79125	1.77891	2.51844	2.38744	1.25331	1.42204	0.877846	2.16737	-0.329972	0.213387	1.3328	0.513551	0.208949	-2.5054	-0.404567
0.864	1.18905	0.310246	1.55598	0.879505	3.30375	0.553594	1.27871	1.72184	1.75143	2.44597	2.32368	1.23106	1.43439	0.851619	2.09521	-0.355037	0.19443	1.26706	0.460763	0.148867	-2.50443	-0.456571
0.912	1.14906	0.252284	1.51616	0.843983	3.10513	0.497285	1.20165	1.64198	1.71325	2.34532	2.24444	1.20589	1.44034	0.821487	1.99253	-0.398517	0.176214	1.1948	0.399475	0.0960726	-2.49731	-0.514831
0.96	1.09474	0.135342	1.47952	0.812371	2.86739	0.438441	0.946788	1.56737	1.67063	2.22648	2.15938	1.18021	1.44214	0.791051	1.89508	-0.443044	0.159088	1.12245	0.335329	0.00407035	-2.4568	-0.572519
1.008	1.04832	0.0216441	1.46277	0.785999	2.79273	0.381167	0.815653	1.51315	1.62993	2.126	2.07748	1.15596	1.44303	0.763623	1.84031	-0.469478	0.143286	1.05704	0.278492	-0.161066	-2.33035	-0.622855
1.056	1.0254	-0.0202311	1.46908	0.765487	2.85526	0.328865	0.835401	1.48531	1.59466	2.07445	2.0061	1.13424	1.44536	0.741307	1.82737	-0.480887	0.128911	1.00324	0.234904	-0.192859	-2.25959	-0.660835
1.104	1.02349	-0.0172633	1.49234	0.750788	2.88371	0.284181	0.790425	1.47993	1.56551	2.07393	1.95025	1.11545	1.44977	0.725615	1.83572	-0.488345	0.115956	0.962923	0.203719	-0.180266	-2.37966	-0.685672
1.152	1.03702	-0.00970336	1.5243	0.741453	2.88474	0.249401	0.749918	1.49008	1.54181	2.11821	1.91269	1.09968	1.4562	0.717609	1.85324	-0.494924	0.104349	0.935981	0.18189	-0.165957	-2.53328	-0.699592
1.2	1.05969	-0.00778116	1.55758	0.736729	2.90442	0.225705	0.777716	1.50985	1.52228	2.19592	1.8942	1.0868	1.46425	0.71685	1.86081	-0.500152	0.0939774	0.921541	0.166681	-0.125006	-2.58978	-0.70563
1.248	1.08445	-0.0124302	1.5862	0.735654	2.92709	0.212344	0.821032	1.53473	1.50549	2.27876	1.89386	1.07647	1.47333	0.721634	1.85393	-0.504952	0.0847098	0.918566	0.15565	-0.0776397	-2.64229	-0.70679
1.296	1.10679	-0.0261466	1.60644	0.737141	2.92438	0.206786	0.774046	1.56112	1.49018	2.3477	1.90936	1.06824	1.48278	0.729958	1.83186	-0.510405	0.0764198	0.925147	0.146496	-0.0718118	-2.69334	-0.70573
1.344	1.12469	-0.0511905	1.61697	0.740122	2.89759	0.205329	0.712131	1.58598	1.47537	2.40104	1.9373	1.06163	1.49205	0.739905	1.79279	-0.51667	0.0689918	0.93859	0.137466	-0.0892717	-2.71971	-0.704502
1.392	1.13674	-0.0836804	1.61831	0.743598	2.87225	0.20393	0.712232	1.6071	1.4605	2.44275	1.97372	1.05623	1.5007	0.749692	1.7565	-0.524022	0.0623217	0.955546	0.127436	-0.0886089	-2.7604	-0.704438
1.44	1.14222	-0.116179	1.61189	0.746686	2.86305	0.199247	0.736143	1.62313	1.44533	2.47265	2.01456	1.05165	1.50842	0.757669	1.74088	-0.532911	0.0563181	0.973237	0.115878	-0.0774559	-2.81163	-0.706206
1.488	1.14144	-0.142917	1.59929	0.74867	2.86665	0.189031	0.708097	1.63358	1.42993	2.48474	2.05619	1.0476	1.51506	0.762615	1.74034	-0.543629	0.0509005	0.990337	0.102764	-0.0790995	-2.82431	-0.710037
1.536	1.13536	-0.161963	1.58192	0.749009	2.86768	0.172087	0.640351	1.63871	1.4145	2.48477	2.09572	1.04386	1.52058	0.764	1.73812	-0.556219	0.0459987	1.00602	0.0883822	-0.0954809	-2.87556	-0.715894
1.584	1.12515	-0.175557	1.56101	0.747355	2.85553	0.148138	0.63578	1.63929	1.39929	2.48337	2.13107	1.04027	1.52501	0.762067	1.71858	-0.570594	0.0415505	1.01917	0.0731082	-0.115564	-2.92013	-0.723555
1.632	1.11213	-0.188073	1.53762	0.743537	2.82709	0.117606	0.628318	1.6363	1.38455	2.48245	2.16084	1.03671	1.52843	0.757781	1.68084	-0.586681	0.0375019	1.02896	0.0573064	-0.127764	-2.96672	-0.732681
1.68	1.09748	-0.204221	1.51263	0.737534	2.78781	0.08119	0.608024	1.6308	1.37045	2.47564	2.18424	1.03313	1.53095	0.75235	1.64091	-0.604399	0.0338053	1.03517	0.0413325	-0.131872	-2.94794	-0.742884
1.728	1.08226	-0.226634	1.48683	0.729446	2.74032	0.0397514	0.532722	1.62374	1.35714	2.45721	2.20101	1.02948	1.53269	0.74649	1.60633	-0.623594	0.0304191	1.03677	0.0255304	-0.131645	-2.91871	-0.753766
1.776	1.0675	-0.255199	1.46094	0.719463	2.68115	-0.00552783	0.483693	1.61591	1.34472	2.43118	2.21127	1.02576	1.53379	0.74029	1.5747	-0.644042	0.0273075	1.03241	0.010194	-0.134603	-2.91407	-0.764952
1.824	1.05405	-0.288366	1.43551	0.707829	2.60929	-0.0532083	0.404971	1.60798	1.33324	2.40254	2.21539	1.02196	1.53434	0.733653	1.53206	-0.665441	0.0244389	1.02232	-0.00443459	-0.150602	-2.96715	-0.776111
1.872	1.04253	-0.323825	1.41098	0.69482	2.53151	-0.101709	0.340496	1.6004	1.32272	2.36311	2.21398	1.0181	1.53445	0.726617	1.47903	-0.687451	0.0217864	1.00877	-0.0181666	-0.179822	-3.00247	-0.78698
1.92	1.03323	-0.359269	1.38763	0.680713	2.45847	-0.149225	0.281325	1.59348	1.31312	2.31723	2.20779	1.0142	1.53422	0.719236	1.42712	-0.709768	0.0193264	0.994839	-0.0308818	-0.217631	-3.04017	-0.797352
1.968	1.02617	-0.392878	1.36559	0.665778	2.40374	-0.193936	0.185219	1.58742	1.30441	2.28382	2.19778	1.01028	1.53373	0.711415	1.38074	-0.732159	0.0170386	0.983227	-0.0425277	-0.258405	-3.0706	-0.807079
2.016	1.02119	-0.422974	1.34487	0.650265	2.37616	-0.234716	0.102612	1.58229	1.29652	2.27663	2.18498	1.00636	1.53304	0.703317	1.33891	-0.754469	0.0149055	0.976428	-0.0531097	-0.291367	-2.94162	-0.816069
2.064	1.01803	-0.448193	1.32546	0.634397	2.37351	-0.271217	0.0867916	1.57811	1.28938	2.29783	2.17044	1.00247	1.53221	0.695351	1.31056	-0.7766	0.0129119	0.975575	-0.0626734	-0.308216	-2.88196	-0.82428
2.112	1.01638	-0.468031	1.30727	0.618368	2.38665	-0.303618	0.074161	1.57483	1.28293	2.34106	2.15515	0.998623	1.53128	0.687848	1.30357	-0.798497	0.0110447	0.980276	-0.0712886	-0.311309	-2.84871	-0.831707
2.16	1.01593	-0.482878	1.29023	0.602346	2.40525	-0.332697	0.0439282	1.57239	1.27709	2.38719	2.13995	0.994841	1.53029	0.680828	1.30401	-0.820129	0.00929245	0.989988	-0.0790375	-0.306322	-2.78575	-0.838376
2.208	1.01637	-0.493607	1.27424	0.586469	2.42196	-0.359582	0.040301	1.57069	1.27179	2.41297	2.12556	0.991137	1.52927	0.674194	1.29838	-0.841479	0.00764528	1.00358	-0.0860072	-0.295481	-2.8453	-0.844331
2.256	1.01745	-0.501237	1.25921	0.570851	2.4324	-0.385288	0.011782	1.56963	1.26698	2.42143	2.11254	0.987521	1.52824	0.668106	1.27775	-0.862532	0.00609453	1.01942	-0.0922848	-0.280209	-2.92477	-0.849627
2.304	1.01897	-0.506753	1.24506	0.55558	2.43482	-0.410409	-0.0357451	1.56913	1.26259	2.42174	2.10132	0.984005	1.52722	0.663098	1.24997	-0.883273	0.00463261	1.03606	-0.0979532	-0.263658	-2.9717	-0.854327
2.352	1.02075	-0.510995	1.23172	0.540727	2.43013	-0.435131	-0.0352337	1.56908	1.25857	2.41908	2.09222	0.980595	1.5262	0.659805	1.22217	-0.903683	0.00325283	1.05279	-0.103089	-0.249883	-3.03406	-0.858494
2.4	1.02267	-0.514662	1.21911	0.526344	2.42132	-0.459376	-0.0589994	1.56942	1.25489	2.42158	2.08546	0.977297	1.52521	0.658691	1.19781	-0.923745	0.00194928	1.06926	-0.107762	-0.241106	-3.12989	-0.862189
2.448	1.02465	-0.518289	1.20719	0.512466	2.41137	-0.482936	-0.077638	1.57006	1.25151	2.43409	2.08119	0.974114	1.52425	0.659867	1.17959	-0.94344	0.000716654	1.08492	-0.112034	-0.237623	-3.25076	-0.865472
2.496	1.02663	-0.522215	1.1959	0.499119	2.40148	-0.505615	-0.0584549	1.57095	1.24839	2.4609	2.07947	0.971049	1.52332	0.66287	1.17129	-0.962752	-0.000449755	1.09884	-0.115957	-0.238852	-3.2787	-0.868394
2.544	1.02856	-0.526583	1.18519	0.486317	2.3913	-0.52729	-0.0760648	1.57203	1.2455	2.50348	2.0803	0.968102	1.52242	0.666776	1.17615	-0.981668	-0.00155421	1.11017	-0.119579	-0.243411	-3.2826	-0.871006
2.592	1.03042	-0.531412	1.17502	0.474065	2.38012	-0.547786	-0.10366	1.57325	1.24283	2.55075	2.08359	0.965272	1.52156	0.670351	1.19189	-1.00018	-0.00260057	1.11859	-0.122938	-0.24919	-3.29002	-0.873349
2.64	1.0322	-0.53667	1.16536	0.46236	2.36749	-0.566842	-0.0873515	1.57457	1.24034	2.58791	2.0892	0.962559	1.52073	0.67212	1.20771	-1.01827	-0.00359235	1.12428	-0.126068	-0.253765	-3.21758	-0.87546
2.688	1.03389	-0.542294	1.15618	0.451197	2.35319	-0.584163	-0.0893103	1.57597	1.23803	2.60797	2.09695	0.95996	1.51993	0.670752	1.21396	-1.03595	-0.00453276	1.12729	-0.128997	-0.255203	-3.16689	-0.877373
2.736	1.03389	-0.542294	1.15618	0.451197	2.35319	-0.584163	-0.0893103	1.57597	1.23803	2.60797	2.09695	0.95996	1.51993	0.670752	1.21396	-1.03595	-0.00453276	1.12729	-0.128997	-0.255203	-3.16689	-0.877373
2.784	1.03389	-0.542294	1.15618	0.451197	2.35319	-0.584163	-0.0893103	1.57597	1.23803	2.60797	2.09695	0.95996	1.51993	0.670752	1.21396	-1.03595	-0.00453276	1.12729	-0.128997	-0.255203	-3.16689	-0.877373
2.832	1.03389	-0.542294	1.15618	0.451197	2.35319	-0.584163	-0.0893103	1.57597	1.23803	2.60797	2.09695	0.95996	1.51993	0.670752	1.21396	-1.03595	-0.00453276	1.12729	-0.128997	-0.255203	-3.16689	-0.877373
2.88	1.03389	-0.542294	1.15618	0.451197	2.35319	-0.584163	-0.0893103	1.57597	1.23803	2.60797	2.09695	0.95996	1.51993	0.670752	1.21396	-1.03595	-0.00453276	1.12729	-0.128997	-0.255203	-3.16689	-0.877373
2.928	1.03389	-0.542294	1.15618	0.451197	2.35319	-0.584163	-0.0893103	1.57597	1.23803	2.60797	2.09695	0.95996	1.51993	0.670752	1.21396	-1.03595	-0.00453276	1.12729	-0.128997	-0.255203	-3.16689	-0.877373
2.976	1.03389	-0.542294	1.15618	0.451197	2.35319	-0.584163	-0.0893103	1.57597	1.23803	2.60797	2.09695	0.95996	1.51993	0.670752	1.21396	-1.03595	-0.00453276	1.12729	-0.128997	-0.255203	-3.16689	-0.877373

## Sheet: CA3 Step
0	719301	521501	659105	580601	526202	525403	525101	521602	719001	520901	719103	521202	525404	719002	520701	525003	521502	521101	719303	719201	525301	525001	659101	521401	580201	580501	521302	520702	521303	521102	521304	719202
-0.816	0.0037732	-0.00487367	-0.00892467	-0.0156404	-0.0121742	-0.00727648	-0.00140499	-0.00153291	-0.000193708	-0.00278546	0.0127751	-0.00415215	-0.00562696	-0.000828574	0.00907659	-0.00412474	0.00416292	0.00678457	0.000403901	0.020992	0.0103135	0.0140711	0.00860442	0.0191262	0.00710732	0.0217557	-0.0100916	0.00641403	0.00601663	0.00441087	-0.00313698	0.00322583
-0.768	0.0071407	-0.00282117	-0.0111944	-0.0101139	-0.0130917	-0.00906152	0.00360169	-0.002414	0.000280785	-0.001891	0.0221947	-0.00615941	-0.00566023	-8.69015e-05	0.015691	-0.000258606	0.00992831	0.0137652	0.00234131	0.0389685	0.0169968	0.0306672	0.0134431	0.0279566	0.0096038	0.0372663	-0.0152043	0.00959676	0.00741241	0.00880003	-0.00304791	0.00416755
-0.72	0.0119092	-0.000715527	-0.010748	-0.00103941	-0.0119008	-0.00954512	0.0127789	-0.00318848	0.00106562	0.000817125	0.0338804	-0.00859398	-0.00366538	0.000444217	0.0220386	0.00175349	0.0185888	0.0219828	0.0054112	0.0571974	0.0247047	0.0508773	0.016465	0.0356779	0.0118923	0.0537398	-0.0207579	0.0118737	0.00912659	0.0131563	-0.00152484	0.00457394
-0.672	0.018398	0.00463778	-0.00679373	0.00840084	-0.00875172	-0.00871287	0.0257685	-0.00366422	0.00207031	0.00530446	0.0477771	-0.0116104	0.000340047	0.00113468	0.0278024	0.00355956	0.0298527	0.0299815	0.00950738	0.0719819	0.0333833	0.0700017	0.0191964	0.042316	0.0144022	0.0699598	-0.0260282	0.0126692	0.0108953	0.0163913	0.00119677	0.00443865
-0.624	0.0268898	0.0171545	0.00115635	0.0166456	-0.00388304	-0.0063928	0.0409934	-0.00367038	0.0031767	0.0116101	0.0637672	-0.0151911	0.0064094	0.00131802	0.0342033	0.00575347	0.0430398	0.0365707	0.0144368	0.0828549	0.0429502	0.0868964	0.0237608	0.0483971	0.0180158	0.0863112	-0.0294972	0.0122687	0.015017	0.0181294	0.00466545	0.00378447
-0.576	0.037598	0.0348786	0.0129849	0.0229924	0.00275948	-0.00229469	0.0569533	-0.00306432	0.00423874	0.0202725	0.0816832	-0.0194225	0.0144904	0.000586525	0.0426666	0.00540969	0.0573557	0.0409104	0.0199413	0.0918384	0.0533311	0.104562	0.0317103	0.0547444	0.0239465	0.103773	-0.030172	0.0117131	0.018686	0.0191262	0.00790183	0.00262225
-0.528	0.0506553	0.0514915	0.0276832	0.0301409	0.0105393	0.00400277	0.0729329	-0.00176573	0.0050837	0.0324416	0.101398	-0.0243384	0.024356	0.00124638	0.0546987	0.00512246	0.0728949	0.0435252	0.0257403	0.101393	0.0644643	0.133805	0.0436836	0.062127	0.0327839	0.122796	-0.0302327	0.0124066	0.0231168	0.0213006	0.0117721	0.000936448
-0.48	0.066091	0.0623592	0.0436541	0.0417208	0.0185492	0.0129683	0.0890164	0.000248864	0.00550706	0.0490213	0.122724	-0.029525	0.0357417	0.0056643	0.0703889	0.011934	0.0909557	0.0463561	0.0315367	0.113917	0.0762577	0.171061	0.0593243	0.0712738	0.0435201	0.143426	-0.0328439	0.0151865	0.0329659	0.0265729	0.0188057	-0.00131648
-0.432	0.0838395	0.0651376	0.0589576	0.0579215	0.0273002	0.0245168	0.106799	0.00297122	0.00526421	0.0695611	0.145129	-0.0335647	0.048478	0.0137081	0.0865798	0.0250465	0.112453	0.0508738	0.0370226	0.128107	0.088536	0.207715	0.0738298	0.082824	0.0544636	0.165508	-0.0377247	0.0185477	0.0483777	0.0356556	0.0294675	-0.00422868
-0.384	0.103733	0.0632921	0.072325	0.0746778	0.0359206	0.0381795	0.126024	0.00633866	0.00406486	0.09196	0.16758	-0.034495	0.0627366	0.0235403	0.10262	0.0312824	0.13599	0.056516	0.0418523	0.137655	0.100995	0.240045	0.082301	0.097359	0.0646087	0.188255	-0.0429222	0.0201792	0.0591733	0.0467118	0.0415934	-0.00789209
-0.336	0.125381	0.0667565	0.0840183	0.0945986	0.0444305	0.053982	0.144105	0.010249	0.0015666	0.113641	0.188407	-0.0310294	0.0792107	0.034307	0.120158	0.0472061	0.159161	0.0622007	0.045575	0.144366	0.113172	0.270763	0.0851303	0.115199	0.0745802	0.21072	-0.0476273	0.0198672	0.0729222	0.0560158	0.0533873	-0.0124019
-0.288	0.148107	0.0760323	0.0959902	0.117712	0.0528833	0.0729747	0.15829	0.0145331	-0.00262424	0.133226	0.205177	-0.0235522	0.09906	0.0433752	0.132987	0.0546481	0.180992	0.0649929	0.0475507	0.149347	0.124486	0.300621	0.0884243	0.135977	0.0868159	0.233598	-0.0533429	0.0197055	0.0814974	0.0599606	0.0642124	-0.0179856
-0.24	0.17057	0.0871288	0.11175	0.147	0.0626295	0.0972514	0.172425	0.0189548	-0.00892849	0.153241	0.21473	-0.0134253	0.123756	0.0528865	0.143647	0.083196	0.203237	0.0635758	0.0469036	0.153956	0.134289	0.333822	0.0997411	0.157631	0.103943	0.261593	-0.0594999	0.0244402	0.0991278	0.0611657	0.0784401	-0.025086
-0.192	0.189821	0.104983	0.136435	0.177847	0.0875767	0.127984	0.198767	0.0233024	-0.0177363	0.182204	0.213382	-0.00323146	0.153594	0.0656503	0.160638	0.0739206	0.231697	0.0659605	0.0425614	0.149346	0.14192	0.376509	0.127576	0.175011	0.125838	0.300017	-0.0603992	0.0313625	0.108247	0.0657544	0.0948854	-0.0344746
-0.144	0.199919	0.151533	0.174829	0.219847	0.142715	0.160694	0.252897	0.0273457	-0.0293204	0.233124	0.197566	-0.000656549	0.183244	0.0935881	0.18905	0.126979	0.277771	0.0895201	0.0333332	0.169428	0.146792	0.461704	0.177488	0.178345	0.145977	0.343018	-0.0484101	0.0412665	0.137379	0.0837427	0.123728	-0.0472291
-0.096	0.19132	0.23344	0.215001	0.299157	0.205961	0.178239	0.327228	0.0308702	-0.0437335	0.303886	0.164623	-0.0213846	0.197094	0.152102	0.227862	0.0720388	0.341637	0.134013	0.0183386	0.16324	0.148532	0.581393	0.219309	0.153549	0.148981	0.361099	-0.0272027	0.067899	0.145411	0.119626	0.182876	-0.0641674
-0.048	0.153465	0.252619	0.201661	0.454178	0.199747	0.14755	0.338417	0.0338299	-0.0606676	0.319681	0.114336	-0.0861644	0.16995	0.217242	0.329968	0.448705	0.369093	0.118379	-0.00238101	0.297843	0.147234	0.753517	0.142755	0.0883683	0.11304	0.300209	-0.0584389	0.0992315	0.304271	0.118377	0.244777	-0.0852489
0	0.0836146	-0.230452	0.0180326	-0.048611	-0.0543799	0.0411087	0.13617	0.0363214	-0.0792624	0.0715309	0.0514143	-0.205773	0.0858145	-0.0692129	0.0398727	-0.205867	0.190611	-0.180323	-0.0272656	-0.131552	0.143805	0.315301	-0.193085	-0.0149807	0.0269176	0.120727	-0.313884	-0.149082	0.00764752	-0.137005	-0.00364176	-0.109217
0.048	0.0280608	-0.329334	0.0151999	-0.0540777	-0.074388	0.0477544	0.175666	-0.133099	-0.123237	0.0614508	0.049636	-0.460606	0.0787015	-0.192724	-0.0681354	-0.331454	0.18994	-0.449807	-0.189171	-0.242785	0.178897	0.308366	-0.234902	-0.0998823	0.0184964	0.117289	-0.542599	-0.342599	-0.0153026	-0.265423	-0.0149655	-0.582311
0.096	0.0967062	-0.410349	0.00775753	-0.0675824	-0.106937	0.0629985	0.233743	-0.0638452	-0.198323	0.0356732	0.0451214	-0.594247	0.191481	-0.249581	-0.168379	-0.535037	0.18554	-0.681465	-0.136047	-0.415377	0.175896	0.290185	-0.311016	-0.222352	-0.00230897	0.108378	-0.667699	-0.570822	-0.05981	-0.439467	-0.0414473	-0.89385
0.144	0.113159	-0.485423	-0.00474126	-0.087894	-0.141269	0.0844762	0.266901	-0.038984	-0.255805	-0.00528913	0.0376305	-0.637708	0.160136	-0.314181	-0.22586	-0.728375	0.173485	-0.746138	-0.0927093	-0.562428	0.210275	0.260639	-0.38955	-0.271683	-0.0346804	0.0937494	-0.733825	-0.741714	-0.110688	-0.572938	-0.0803361	-1.15218
0.192	0.164933	-0.552922	-0.0223937	-0.113049	-0.176439	0.109354	0.266787	-0.0624778	-0.277918	-0.0594505	0.0270575	-0.799954	0.119778	-0.38563	-0.299921	-0.887115	0.151094	-0.783937	-0.211032	-0.683646	0.279892	0.220365	-0.454321	-0.290088	-0.0770319	0.0734641	-0.797255	-0.920486	-0.160523	-0.682858	-0.130329	-1.37836
0.24	0.228918	-0.592347	-0.0450318	-0.14156	-0.210536	0.134594	0.245442	0.0535188	-0.281338	-0.124595	0.0134178	-0.947338	0.101868	-0.434967	-0.361692	-1.02347	0.118015	-0.894384	-0.203988	-0.784555	0.326931	0.170827	-0.508678	-0.336351	-0.127627	0.0478299	-0.844227	-1.14579	-0.211683	-0.793711	-0.192275	-1.57878
0.288	0.22434	-0.621648	-0.0721221	-0.17215	-0.242642	0.156877	0.214586	0.118175	-0.28142	-0.198168	-0.00309484	-1.04436	-0.0128816	-0.456169	-0.405201	-1.15636	0.0760774	-1.01058	-0.18318	-0.851907	0.381259	0.114421	-0.559923	-0.434005	-0.184245	0.0176149	-0.861224	-1.34414	-0.266792	-0.895476	-0.26669	-1.75339
0.336	0.223328	-0.656098	-0.102867	-0.203817	-0.274215	0.173177	0.177125	0.156087	-0.282287	-0.277838	-0.022183	-1.12056	-0.0917281	-0.516211	-0.451245	-1.29188	0.0276585	-1.09458	-0.283158	-0.89447	0.315225	0.0533435	-0.609033	-0.420972	-0.244579	-0.0161723	-0.88177	-1.49278	-0.326132	-0.982674	-0.352952	-1.90148
0.384	0.124636	-0.709384	-0.136383	-0.236016	-0.306068	0.181412	0.132607	0.220824	-0.286015	-0.361708	-0.0435107	-1.17082	-0.153087	-0.572086	-0.498689	-1.41194	-0.0252215	-1.16992	-0.342714	-0.93109	0.343615	-0.0108281	-0.654161	-0.412635	-0.30666	-0.0524947	-0.928211	-1.62511	-0.389194	-1.06256	-0.449305	-2.0196
0.432	0.109222	-0.77773	-0.171745	-0.268599	-0.337597	0.180621	0.0855401	0.235353	-0.294746	-0.448058	-0.0667222	-1.20121	-0.224412	-0.630163	-0.54224	-1.50669	-0.0808732	-1.21288	-0.348493	-0.97494	0.336659	-0.0769703	-0.693307	-0.459118	-0.368872	-0.0903215	-0.9956	-1.74371	-0.458777	-1.12734	-0.553176	-2.0775
0.48	0.0138882	-0.830822	-0.208035	-0.301553	-0.367685	0.170748	0.0411468	0.244258	-0.307828	-0.535265	-0.091453	-1.23874	-0.271112	-0.694061	-0.585863	-1.5851	-0.137829	-1.20971	-0.354269	-1.02172	0.331046	-0.144227	-0.726548	-0.511389	-0.429874	-0.128653	-1.05681	-1.8442	-0.536158	-1.1747	-0.661555	-2.05516
0.528	-0.021862	-0.855094	-0.244409	-0.334811	-0.395976	0.15242	-0.00291714	0.279619	-0.321359	-0.621912	-0.117344	-1.28107	-0.315354	-0.770194	-0.62946	-1.65541	-0.194878	-1.18677	-0.349722	-1.06067	0.31487	-0.211945	-0.755009	-0.532167	-0.488555	-0.166573	-1.09643	-1.9198	-0.619639	-1.21365	-0.771302	-1.98211
0.576	-0.00646151	-0.863479	-0.280137	-0.368208	-0.423049	0.126699	-0.0524371	0.302315	-0.331702	-0.70683	-0.144053	-1.3292	-0.385156	-0.820155	-0.674251	-1.71793	-0.251029	-1.16128	-0.344756	-1.09389	0.233711	-0.279584	-0.778663	-0.580366	-0.544063	-0.20327	-1.10189	-1.94511	-0.705868	-1.24835	-0.879333	-1.89924
0.624	-0.0275308	-0.875657	-0.314645	-0.401507	-0.449754	0.0948468	-0.109837	0.321695	-0.337628	-0.789108	-0.171262	-1.37436	-0.452745	-0.885956	-0.717694	-1.77402	-0.305485	-1.14427	-0.349363	-1.11862	0.171658	-0.34665	-0.797252	-0.647704	-0.595809	-0.238043	-1.09006	-1.94682	-0.791523	-1.27775	-0.982816	-1.7965
0.672	-0.0338861	-0.889624	-0.347525	-0.434434	-0.477177	0.0581653	-0.174038	0.283137	-0.339241	-0.868109	-0.198686	-1.3954	-0.549484	-0.929035	-0.754732	-1.82692	-0.357718	-1.13975	-0.357826	-1.1261	0.0963169	-0.412716	-0.81125	-0.688966	-0.643432	-0.27031	-1.08128	-1.93905	-0.874917	-1.29852	-1.07949	-1.67769
0.72	-0.00774441	-0.882041	-0.378539	-0.466698	-0.506117	0.0178679	-0.243271	0.245178	-0.337325	-0.943439	-0.226069	-1.38666	-0.690995	-0.976756	-0.784604	-1.87773	-0.407427	-1.14031	-0.3649	-1.1184	0.0695875	-0.477432	-0.821382	-0.703619	-0.686758	-0.299616	-1.07008	-1.94446	-0.954248	-1.30809	-1.16794	-1.57556
0.768	-0.0149661	-0.882738	-0.407577	-0.498025	-0.536588	-0.0249743	-0.316235	0.311526	-0.332888	-1.01491	-0.25319	-1.35915	-0.844713	-1.01684	-0.811766	-1.92261	-0.454466	-1.13888	-0.368703	-1.11039	0.023778	-0.540516	-0.827787	-0.721386	-0.725758	-0.325654	-1.05186	-1.96531	-1.02589	-1.30559	-1.2476	-1.50132
0.816	-0.0969092	-0.920704	-0.434627	-0.528184	-0.568011	-0.0694479	-0.391024	0.287548	-0.326832	-1.08246	-0.279859	-1.3265	-0.977943	-1.05392	-0.837877	-1.95742	-0.498814	-1.13459	-0.372211	-1.11517	0.0220182	-0.601751	-0.83059	-0.752859	-0.760516	-0.348259	-1.02189	-1.98005	-1.08548	-1.29052	-1.31849	-1.3757
0.864	-0.17928	-0.926357	-0.459745	-0.556986	-0.599482	-0.114805	-0.464771	0.227212	-0.319956	-1.14617	-0.305916	-1.30035	-1.06359	-1.07873	-0.858476	-1.98112	-0.540545	-1.12857	-0.373605	-1.13391	-0.0266405	-0.660982	-0.83033	-0.769942	-0.791202	-0.367364	-0.972144	-1.96591	-1.12997	-1.26336	-1.38104	-1.18316
0.912	-0.22642	-0.926405	-0.483033	-0.584302	-0.630046	-0.160448	-0.534346	0.294383	-0.312988	-1.20619	-0.331229	-1.28699	-1.10031	-1.0621	-0.872114	-1.99572	-0.579798	-1.11928	-0.373712	-1.14109	-0.0975525	-0.71811	-0.827891	-0.738659	-0.818049	-0.382979	-0.911706	-1.91177	-1.15866	-1.22711	-1.436	-1.00872
0.96	-0.263523	-0.963698	-0.504624	-0.610075	-0.658948	-0.205907	-0.597273	0.179241	-0.306616	-1.26269	-0.355691	-1.28658	-1.11256	-1.06424	-0.881546	-2.00478	-0.616754	-1.10595	-0.375653	-1.13118	-0.213773	-0.773091	-0.82427	-0.682879	-0.841324	-0.395185	-0.861332	-1.8265	-1.17346	-1.18665	-1.48438	-0.855299
1.008	-0.301491	-0.994634	-0.524665	-0.634314	-0.685666	-0.250821	-0.652251	0.0728792	-0.301314	-1.31592	-0.379221	-1.29603	-1.12264	-1.03962	-0.889355	-2.01231	-0.651627	-1.09246	-0.377484	-1.10845	-0.299844	-0.825925	-0.820396	-0.644943	-0.861317	-0.404166	-0.837952	-1.73558	-1.17797	-1.14703	-1.52729	-0.609777
1.056	-0.324814	-1.01711	-0.543304	-0.657083	-0.709911	-0.294916	-0.699158	0.111344	-0.297289	-1.3661	-0.401757	-1.31195	-1.14116	-1.00097	-0.897456	-2.02163	-0.684638	-1.08443	-0.377508	-1.07348	-0.255583	-0.876647	-0.817014	-0.634997	-0.878327	-0.410232	-0.849999	-1.69079	-1.17675	-1.11257	-1.56582	-0.544444
1.104	-0.333407	-1.05661	-0.560689	-0.678483	-0.731581	-0.33799	-0.738818	0.0747966	-0.29456	-1.41349	-0.423255	-1.33062	-1.16985	-1.0287	-0.907285	-2.03436	-0.716001	-1.08479	-0.376709	-1.0499	-0.267801	-0.925315	-0.814546	-0.638532	-0.892652	-0.413796	-0.893453	-1.7078	-1.17401	-1.08617	-1.60103	-0.536749
1.152	-0.332514	-1.0711	-0.576958	-0.698628	-0.750705	-0.379901	-0.772588	0.0701816	-0.29302	-1.45832	-0.44369	-1.34823	-1.2054	-1.05313	-0.919301	-2.05062	-0.745908	-1.09343	-0.37552	-1.04464	-0.249271	-0.972001	-0.813112	-0.641653	-0.904584	-0.415318	-0.957919	-1.76993	-1.17277	-1.06894	-1.63381	-0.584633
1.2	-0.334182	-1.09134	-0.592236	-0.717642	-0.767386	-0.420549	-0.80195	0.11709	-0.292478	-1.50079	-0.463048	-1.36247	-1.24331	-1.06808	-0.933183	-2.06963	-0.774527	-1.10854	-0.374148	-1.04151	-0.202331	-1.01678	-0.812651	-0.639146	-0.914398	-0.415233	-1.03312	-1.85316	-1.17488	-1.0605	-1.66492	-0.56823
1.248	-0.347023	-1.1501	-0.606635	-0.735639	-0.781773	-0.459868	-0.82824	0.133112	-0.292733	-1.54112	-0.481329	-1.37231	-1.28181	-1.06659	-0.948449	-2.09026	-0.801997	-1.12756	-0.373231	-1.0408	-0.179007	-1.05974	-0.812987	-0.630145	-0.922356	-0.413931	-1.11085	-1.94042	-1.18106	-1.05958	-1.69496	-0.580786
1.296	-0.367269	-1.18139	-0.620253	-0.752729	-0.794036	-0.497821	-0.852549	0.171818	-0.293614	-1.57948	-0.498544	-1.3774	-1.3216	-1.07786	-0.964609	-2.11137	-0.82843	-1.14799	-0.372374	-1.05152	-0.161773	-1.10096	-0.813895	-0.620466	-0.928696	-0.411727	-1.18511	-2.02101	-1.19135	-1.0645	-1.72436	-0.561909
1.344	-0.387709	-1.20424	-0.633173	-0.76901	-0.804357	-0.534393	-0.875696	0.2003	-0.294983	-1.61603	-0.514711	-1.37827	-1.36327	-1.09339	-0.981243	-2.13198	-0.853913	-1.16798	-0.370863	-1.06434	-0.210977	-1.1405	-0.815137	-0.616473	-0.933638	-0.408863	-1.25226	-2.08799	-1.20538	-1.07347	-1.75346	-0.59585
1.392	-0.407549	-1.21813	-0.645466	-0.784569	-0.812917	-0.569585	-0.898266	0.18974	-0.296732	-1.65092	-0.529854	-1.37584	-1.40591	-1.09063	-0.998023	-2.15139	-0.878511	-1.18634	-0.368526	-1.07188	-0.201059	-1.17845	-0.816496	-0.619426	-0.937379	-0.405534	-1.31067	-2.14075	-1.22249	-1.08486	-1.78246	-0.587739
1.44	-0.42735	-1.23592	-0.657192	-0.799482	-0.819894	-0.603411	-0.920655	0.18801	-0.298769	-1.68429	-0.544006	-1.37097	-1.44834	-1.11266	-1.01467	-2.16916	-0.902275	-1.20238	-0.365249	-1.07567	-0.233225	-1.21488	-0.817793	-0.627156	-0.940094	-0.401922	-1.35999	-2.18441	-1.24179	-1.09735	-1.81148	-0.575968
1.488	-0.443793	-1.27382	-0.668401	-0.813815	-0.825463	-0.635894	-0.943106	0.20561	-0.301019	-1.71623	-0.5572	-1.36443	-1.48956	-1.16932	-1.03094	-2.18508	-0.925242	-1.21577	-0.36091	-1.08347	-0.238572	-1.24984	-0.818893	-0.636532	-0.941942	-0.398192	-1.40083	-2.22584	-1.26225	-1.10991	-1.84056	-0.549853
1.536	-0.455179	-1.31598	-0.679134	-0.827624	-0.829784	-0.667067	-0.965739	0.195736	-0.303413	-1.74686	-0.569475	-1.35692	-1.52879	-1.18723	-1.04665	-2.1991	-0.94744	-1.22647	-0.355636	-1.09502	-0.225639	-1.28341	-0.819701	-0.644425	-0.94306	-0.394495	-1.43447	-2.27049	-1.28277	-1.12178	-1.8697	-0.478543
1.584	-0.462192	-1.3522	-0.689427	-0.840958	-0.83301	-0.696965	-0.988587	0.148748	-0.305895	-1.77625	-0.580872	-1.34903	-1.56546	-1.20474	-1.06169	-2.21124	-0.968891	-1.23458	-0.349766	-1.10239	-0.224982	-1.31564	-0.820163	-0.648789	-0.94357	-0.390971	-1.46256	-2.31775	-1.30231	-1.13247	-1.89884	-0.391023
1.632	-0.465354	-1.35357	-0.699309	-0.853862	-0.835283	-0.725627	-1.01162	0.134645	-0.308417	-1.80449	-0.591433	-1.34119	-1.59919	-1.23549	-1.07604	-2.2216	-0.989613	-1.24035	-0.343718	-1.10297	-0.274866	-1.34659	-0.820256	-0.649496	-0.943576	-0.387725	-1.48664	-2.35949	-1.31995	-1.14167	-1.92792	-0.333082
1.68	-0.465048	-1.3527	-0.708806	-0.86637	-0.836733	-0.753095	-1.03477	0.0805967	-0.310939	-1.83165	-0.601201	-1.33363	-1.62977	-1.25838	-1.0897	-2.23032	-1.00962	-1.24407	-0.337911	-1.10251	-0.27278	-1.3763	-0.819983	-0.647547	-0.94317	-0.384816	-1.50809	-2.38724	-1.33504	-1.14925	-1.95683	-0.262155
1.728	-0.462123	-1.34988	-0.717938	-0.878515	-0.837478	-0.779412	-1.05796	0.0287712	-0.313431	-1.85778	-0.610219	-1.32646	-1.65725	-1.29694	-1.10273	-2.23754	-1.02893	-1.24606	-0.332684	-1.10836	-0.315869	-1.40484	-0.819368	-0.644093	-0.942433	-0.382258	-1.52797	-2.39553	-1.3472	-1.15519	-1.98548	-0.228513
1.776	-0.457333	-1.33335	-0.726724	-0.890323	-0.837628	-0.804619	-1.0811	0.0309158	-0.315872	-1.88295	-0.61853	-1.3197	-1.6819	-1.35977	-1.1152	-2.24342	-1.04756	-1.24663	-0.328246	-1.11309	-0.34623	-1.43225	-0.818442	-0.640221	-0.941431	-0.38	-1.54704	-2.3831	-1.35633	-1.15957	-2.01376	-0.211888
1.824	-0.451539	-1.33624	-0.73518	-0.901818	-0.837278	-0.82876	-1.1041	-0.0138709	-0.318244	-1.90719	-0.626178	-1.31331	-1.70421	-1.43744	-1.12717	-2.24812	-1.06553	-1.24607	-0.324697	-1.11074	-0.352326	-1.45858	-0.817247	-0.636891	-0.940224	-0.377915	-1.56575	-2.35163	-1.36258	-1.16252	-2.04158	-0.171175
1.872	-0.445634	-1.35205	-0.74332	-0.913019	-0.836517	-0.851877	-1.12689	-0.0353607	-0.320538	-1.93056	-0.633203	-1.30722	-1.72471	-1.45869	-1.13873	-2.25178	-1.08284	-1.2446	-0.322057	-1.10426	-0.395838	-1.48386	-0.815824	-0.63467	-0.938862	-0.375795	-1.58438	-2.30514	-1.36626	-1.16419	-2.06884	-0.0844842
1.92	-0.440108	-1.37112	-0.751157	-0.923946	-0.835421	-0.87401	-1.1494	-0.0814678	-0.322748	-1.95308	-0.639645	-1.30137	-1.74394	-1.45675	-1.14992	-2.25452	-1.09952	-1.24241	-0.320293	-1.10251	-0.450985	-1.50815	-0.814216	-0.633741	-0.937385	-0.373359	-1.60304	-2.24962	-1.36776	-1.16475	-2.09548	-0.0350012
1.968	-0.435125	-1.39167	-0.758703	-0.934611	-0.834057	-0.895201	-1.17157	-0.198264	-0.324873	-1.97481	-0.645545	-1.2957	-1.76233	-1.45572	-1.16082	-2.25648	-1.11559	-1.23967	-0.319338	-1.10307	-0.532975	-1.53148	-0.812463	-0.633991	-0.93583	-0.370295	-1.62176	-2.19257	-1.36751	-1.16438	-2.12141	0.0119432
2.016	-0.430777	-1.39249	-0.765969	-0.945029	-0.832482	-0.915487	-1.19335	-0.239147	-0.326912	-1.99577	-0.650939	-1.2902	-1.78023	-1.43128	-1.17144	-2.25778	-1.13105	-1.23651	-0.319114	-1.09628	-0.549464	-1.5539	-0.810602	-0.635164	-0.934227	-0.366307	-1.64049	-2.14102	-1.36598	-1.16324	-2.14659	0.101549
2.064	-0.427161	-1.4238	-0.772966	-0.955211	-0.830747	-0.934907	-1.21471	-0.228823	-0.328869	-2.016	-0.655864	-1.28483	-1.79788	-1.40096	-1.18183	-2.2585	-1.14594	-1.23304	-0.319534	-1.08125	-0.559375	-1.57543	-0.808666	-0.636959	-0.932599	-0.36118	-1.65915	-2.10017	-1.36357	-1.16146	-2.17096	0.113127
2.112	-0.424381	-1.43701	-0.779704	-0.965166	-0.828893	-0.953497	-1.23562	-0.231903	-0.330747	-2.03552	-0.660354	-1.27959	-1.81545	-1.39231	-1.19198	-2.25875	-1.16027	-1.22936	-0.320508	-1.06888	-0.546621	-1.59611	-0.806684	-0.639081	-0.930968	-0.354843	-1.67764	-2.07316	-1.36067	-1.15919	-2.1945	0.0882891
2.16	-0.422545	-1.43988	-0.786192	-0.974903	-0.826956	-0.971292	-1.25606	-0.244545	-0.332549	-2.05436	-0.66444	-1.27446	-1.83298	-1.42556	-1.20192	-2.25861	-1.17406	-1.22554	-0.321945	-1.0679	-0.550362	-1.61599	-0.804681	-0.641273	-0.92935	-0.347394	-1.69585	-2.06092	-1.3576	-1.15651	-2.21717	0.115092
2.208	-0.421688	-1.42782	-0.792439	-0.98443	-0.824964	-0.988326	-1.27601	-0.240358	-0.334281	-2.07255	-0.668155	-1.26944	-1.85052	-1.42895	-1.21163	-2.25816	-1.18732	-1.22166	-0.32376	-1.07412	-0.595613	-1.63508	-0.802677	-0.643324	-0.927758	-0.339094	-1.71367	-2.06253	-1.35461	-1.15354	-2.23896	0.083482
2.256	-0.421768	-1.41822	-0.798454	-0.993755	-0.822944	-1.00463	-1.29548	-0.246533	-0.335946	-2.0901	-0.671527	-1.26452	-1.86805	-1.41687	-1.22111	-2.25745	-1.20007	-1.21776	-0.325873	-1.08151	-0.574429	-1.65342	-0.80069	-0.645069	-0.926204	-0.330337	-1.73101	-2.07586	-1.35191	-1.15034	-2.25986	0.076035
2.304	-0.422693	-1.44784	-0.804246	-1.00288	-0.820914	-1.02024	-1.31445	-0.226754	-0.337549	-2.10706	-0.674583	-1.25971	-1.88553	-1.43474	-1.23035	-2.25654	-1.21234	-1.21389	-0.328214	-1.08853	-0.541331	-1.67105	-0.798735	-0.646392	-0.924694	-0.321567	-1.7478	-2.09805	-1.34963	-1.14699	-2.27987	0.117398
2.352	-0.42435	-1.5043	-0.809822	-1.01182	-0.818891	-1.03518	-1.33292	-0.224898	-0.339094	-2.12342	-0.67735	-1.255	-1.90292	-1.42873	-1.23935	-2.25548	-1.22413	-1.21008	-0.330721	-1.10131	-0.542241	-1.68798	-0.796821	-0.647229	-0.923236	-0.313183	-1.76397	-2.1259	-1.34787	-1.14355	-2.29899	0.115485
2.4	-0.426621	-1.56691	-0.815191	-1.02057	-0.816887	-1.04948	-1.35091	-0.250175	-0.340583	-2.13923	-0.67985	-1.25039	-1.92014	-1.41415	-1.24809	-2.25431	-1.23547	-1.20635	-0.333344	-1.12243	-0.507907	-1.70425	-0.794958	-0.647556	-0.921835	-0.305485	-1.77947	-2.15613	-1.34666	-1.14005	-2.31723	0.0768332
2.448	-0.429387	-1.5805	-0.820361	-1.02914	-0.814913	-1.06316	-1.36842	-0.269493	-0.34202	-2.15449	-0.682106	-1.24588	-1.93713	-1.42726	-1.25656	-2.25306	-1.24637	-1.20272	-0.33604	-1.14378	-0.5246	-1.71988	-0.793152	-0.647385	-0.920492	-0.298653	-1.79428	-2.18568	-1.34603	-1.13654	-2.33461	0.103971
2.496	-0.432549	-1.55328	-0.825337	-1.03753	-0.812978	-1.07626	-1.38545	-0.258118	-0.343409	-2.16922	-0.68414	-1.24148	-1.95382	-1.43357	-1.26476	-2.25176	-1.25686	-1.19921	-0.338776	-1.15926	-0.506451	-1.73489	-0.791409	-0.646747	-0.919211	-0.292774	-1.80837	-2.21197	-1.34594	-1.13304	-2.35113	0.103823
2.544	-0.436019	-1.55471	-0.830128	-1.04575	-0.811086	-1.08881	-1.40202	-0.257436	-0.344752	-2.18345	-0.68597	-1.23719	-1.97015	-1.44139	-1.27267	-2.25043	-1.26693	-1.19582	-0.341525	-1.16534	-0.521257	-1.74932	-0.78973	-0.645686	-0.917992	-0.287859	-1.82173	-2.23316	-1.34638	-1.12959	-2.36683	0.149289
2.592	-0.439723	-1.58917	-0.834741	-1.0538	-0.809243	-1.10081	-1.41813	-0.264678	-0.346052	-2.1972	-0.687614	-1.233	-1.98607	-1.44739	-1.2803	-2.24908	-1.27662	-1.19256	-0.344267	-1.16161	-0.533294	-1.76319	-0.788119	-0.644256	-0.916836	-0.283881	-1.83438	-2.24815	-1.34729	-1.1262	-2.38173	0.158645
2.64	-0.443599	-1.6117	-0.839182	-1.06168	-0.807452	-1.1123	-1.4338	-0.264592	-0.34731	-2.21047	-0.68909	-1.22892	-2.00151	-1.43591	-1.28764	-2.24774	-1.28593	-1.18943	-0.346984	-1.15155	-0.54658	-1.77651	-0.786576	-0.642511	-0.915742	-0.280803	-1.84631	-2.25643	-1.34862	-1.12289	-2.39584	0.170018
2.688	-0.447595	-1.62254	-0.843457	-1.06941	-0.805716	-1.1233	-1.44903	-0.267288	-0.348529	-2.22328	-0.690411	-1.22496	-2.01644	-1.42327	-1.29469	-2.24642	-1.29488	-1.18643	-0.349666	-1.14522	-0.560462	-1.78931	-0.785101	-0.640503	-0.914709	-0.278581	-1.85754	-2.25796	-1.35032	-1.11967	-2.4092	0.191998
2.736	-0.447595	-1.62254	-0.843457	-1.06941	-0.805716	-1.1233	-1.44903	-0.267288	-0.348529	-2.22328	-0.690411	-1.22496	-2.01644	-1.42327	-1.29469	-2.24642	-1.29488	-1.18643	-0.349666	-1.14522	-0.560462	-1.78931	-0.785101	-0.640503	-0.914709	-0.278581	-1.85754	-2.25796	-1.35032	-1.11967	-2.4092	0.191998
2.784	-0.447595	-1.62254	-0.843457	-1.06941	-0.805716	-1.1233	-1.44903	-0.267288	-0.348529	-2.22328	-0.690411	-1.22496	-2.01644	-1.42327	-1.29469	-2.24642	-1.29488	-1.18643	-0.349666	-1.14522	-0.560462	-1.78931	-0.785101	-0.640503	-0.914709	-0.278581	-1.85754	-2.25796	-1.35032	-1.11967	-2.4092	0.191998
2.832	-0.447595	-1.62254	-0.843457	-1.06941	-0.805716	-1.1233	-1.44903	-0.267288	-0.348529	-2.22328	-0.690411	-1.22496	-2.01644	-1.42327	-1.29469	-2.24642	-1.29488	-1.18643	-0.349666	-1.14522	-0.560462	-1.78931	-0.785101	-0.640503	-0.914709	-0.278581	-1.85754	-2.25796	-1.35032	-1.11967	-2.4092	0.191998
2.88	-0.447595	-1.62254	-0.843457	-1.06941	-0.805716	-1.1233	-1.44903	-0.267288	-0.348529	-2.22328	-0.690411	-1.22496	-2.01644	-1.42327	-1.29469	-2.24642	-1.29488	-1.18643	-0.349666	-1.14522	-0.560462	-1.78931	-0.785101	-0.640503	-0.914709	-0.278581	-1.85754	-2.25796	-1.35032	-1.11967	-2.4092	0.191998
2.928	-0.447595	-1.62254	-0.843457	-1.06941	-0.805716	-1.1233	-1.44903	-0.267288	-0.348529	-2.22328	-0.690411	-1.22496	-2.01644	-1.42327	-1.29469	-2.24642	-1.29488	-1.18643	-0.349666	-1.14522	-0.560462	-1.78931	-0.785101	-0.640503	-0.914709	-0.278581	-1.85754	-2.25796	-1.35032	-1.11967	-2.4092	0.191998
2.976	-0.447595	-1.62254	-0.843457	-1.06941	-0.805716	-1.1233	-1.44903	-0.267288	-0.348529	-2.22328	-0.690411	-1.22496	-2.01644	-1.42327	-1.29469	-2.24642	-1.29488	-1.18643	-0.349666	-1.14522	-0.560462	-1.78931	-0.785101	-0.640503	-0.914709	-0.278581	-1.85754	-2.25796	-1.35032	-1.11967	-2.4092	0.191998

## Sheet: CA1 Step
0	522703	523101	522403	524401	524304	522502	524303	523002	522202	521701	522402	522203	524301	524302	522001	522701	522503	522002	522401	522902	521801	523201	522101	522301	522702	522802	522501	659203	522201	522801	524305	523001
-0.816	0.00668029	0.00393731	0.0214996	0.0255674	-0.00802895	0.00465907	-0.00570868	0.00925812	0.00535838	-0.0092483	-0.00197629	-0.00908281	-0.00647361	-0.00282039	0.0151534	0.00558311	0.00639112	0.000980632	0.00798506	0.00343314	-0.00471827	0.0109033	0.00169499	-0.00894238	-0.00226987	-0.00179256	-0.0152575	-0.00265599	0.00745382	-0.0045556	-0.00805068	0.0044161
-0.768	0.00950551	0.00737593	0.0270804	0.0403214	-0.00957979	0.0070789	-0.00703648	0.0177016	0.00777385	-0.012593	-0.000175438	-0.0124023	-0.00914818	-0.00348827	0.0199882	0.00816107	0.0107577	-0.00370329	0.014001	0.00623969	-0.00709917	0.0153439	0.00316562	-0.0127377	-0.00139326	-9.50214e-05	-0.00921199	-0.00177983	0.014382	0.00040671	-0.0100715	0.00830929
-0.72	0.0125341	0.0114816	0.0309631	0.0558014	-0.0084665	0.00957817	-0.0071123	0.0288119	0.0101766	-0.0139454	0.00348414	-0.0145712	-0.0113782	-0.00322597	0.0238182	0.0121844	0.016042	-0.0038622	0.0217373	0.00989735	-0.00957864	0.0193871	0.005597	-0.0160424	0.000865454	0.00377429	0.00467715	0.0010878	0.0210249	0.0100823	-0.0116523	0.0143268
-0.672	0.016252	0.0159538	0.0345466	0.0714247	-0.00425429	0.0121786	-0.00582454	0.0422816	0.0127437	-0.0123439	0.00885119	-0.0156716	-0.0131887	-0.00170563	0.0269636	0.0162765	0.0223758	0.00417491	0.0314815	0.0143938	-0.0122152	0.0234008	0.00943599	-0.018943	0.00448994	0.0100118	0.0218012	0.00622908	0.0258359	0.0232681	-0.0138217	0.0230657
-0.624	0.020986	0.0205037	0.0388835	0.0865726	0.0030559	0.0149119	-0.00304708	0.0576797	0.0156664	-0.00686709	0.0157498	-0.0160475	-0.0145927	0.00134173	0.029901	0.0196816	0.0299413	0.0182145	0.0435003	0.0197255	-0.0150805	0.0278822	0.0150874	-0.0215627	0.00943548	0.0187951	0.0390103	0.0138614	0.0284323	0.0387302	-0.0170634	0.0348948
-0.576	0.0267691	0.024954	0.0444574	0.100904	0.0133783	0.0178239	0.00135395	0.074608	0.0191527	0.00324223	0.0241966	-0.0161573	-0.0155545	0.00617404	0.0335919	0.023899	0.0389624	0.0287182	0.0579692	0.0259299	-0.0182688	0.0333876	0.0229942	-0.0239923	0.0156024	0.0302835	0.0553332	0.0241181	0.0312814	0.0557438	-0.0211885	0.0504332
-0.528	0.03328	0.0293069	0.0511067	0.114526	0.0268643	0.0209722	0.0075038	0.09283	0.0234273	0.018457	0.0344672	-0.0163091	-0.016016	0.0130614	0.0395206	0.0295498	0.0497331	0.033231	0.0748906	0.033094	-0.0218529	0.0404546	0.0336675	-0.026234	0.0228084	0.0445824	0.0704589	0.0369288	0.0379958	0.0736869	-0.0255807	0.071478
-0.48	0.040082	0.0337593	0.0581941	0.127944	0.0431413	0.0244229	0.0154834	0.112451	0.0287358	0.038891	0.0467501	-0.0164125	-0.0159263	0.0222683	0.0492942	0.0348606	0.0626174	0.0383636	0.0941659	0.0414031	-0.0258546	0.0495448	0.0477214	-0.0281988	0.0307715	0.0617584	0.0849575	0.0521718	0.0489166	0.0904691	-0.0299216	0.0994096
-0.432	0.0468701	0.0387315	0.0645334	0.142086	0.0616554	0.0282472	0.0252802	0.133737	0.035351	0.0643681	0.0610998	-0.016257	-0.0152421	0.0340796	0.0642855	0.0387403	0.0779471	0.0447823	0.115787	0.0511549	-0.0302258	0.061058	0.0659998	-0.0297204	0.0391176	0.0818533	0.0978737	0.0699978	0.0609727	0.102992	-0.0349516	0.131266
-0.384	0.0536989	0.0448196	0.0691201	0.158175	0.082268	0.032517	0.0367649	0.156942	0.0435765	0.0945151	0.0773738	-0.0156337	-0.0139448	0.048881	0.0856159	0.0409185	0.0958595	0.0525874	0.139853	0.062797	-0.034893	0.075282	0.0896566	-0.0305966	0.0473815	0.104905	0.11003	0.0909583	0.0704913	0.110518	-0.0412694	0.159673
-0.336	0.0612161	0.0527227	0.0709147	0.177596	0.104881	0.0373044	0.049683	0.182763	0.0537498	0.128891	0.0951375	-0.0137357	-0.0120493	0.0671357	0.113222	0.0410746	0.1163	0.0625493	0.16644	0.0769592	-0.0399002	0.0923687	0.120021	-0.0307367	0.0550209	0.130894	0.122799	0.116045	0.0763569	0.116673	-0.0480768	0.179223
-0.288	0.0705281	0.0631714	0.0685848	0.202142	0.129498	0.0426781	0.0636572	0.213225	0.0662557	0.166995	0.113575	-0.00901424	-0.00960228	0.0892581	0.145846	0.0397957	0.139467	0.0735228	0.195425	0.094458	-0.045543	0.11257	0.158345	-0.0303235	0.0614405	0.159633	0.138205	0.146248	0.0829535	0.124028	-0.0530928	0.194894
-0.24	0.0829667	0.0769127	0.0619891	0.233836	0.156711	0.0486951	0.0781758	0.251591	0.0815105	0.208025	0.131316	0.00024391	-0.0066843	0.115576	0.182911	0.037517	0.165837	0.0798254	0.225694	0.11624	-0.0525252	0.136489	0.205436	-0.0299742	0.0660101	0.19068	0.157648	0.181697	0.0989248	0.135677	-0.0533894	0.215365
-0.192	0.100103	0.0947575	0.0548972	0.274603	0.192194	0.0553884	0.0926058	0.301334	0.0999056	0.250789	0.146039	0.0142745	-0.00342392	0.146209	0.227183	0.0331628	0.196031	0.0871931	0.253839	0.143139	-0.0620116	0.165014	0.261516	-0.0308763	0.0681022	0.223331	0.181906	0.219491	0.132417	0.152831	-0.0473891	0.240708
-0.144	0.123582	0.117529	0.0568011	0.325737	0.249428	0.0627526	0.106255	0.365423	0.121705	0.293711	0.154283	0.0291076	-1.96355e-05	0.180854	0.285946	0.0287827	0.229149	0.0901506	0.272483	0.175652	-0.0755594	0.199148	0.325992	-0.0347728	0.0671984	0.256661	0.227643	0.251216	0.18465	0.181325	-0.0385184	0.280112
-0.096	0.154736	0.145688	0.0847945	0.387211	0.332141	0.0707335	0.118509	0.445552	0.146916	0.334976	0.152177	0.0337375	0.00330981	0.218675	0.371368	0.0459233	0.257322	0.086425	0.267035	0.213736	-0.0948038	0.239841	0.397097	-0.0436994	0.0630386	0.289604	0.301	0.262112	0.232458	0.24736	-0.0419261	0.349456
-0.048	0.19384	0.178872	0.163508	0.457473	0.36128	0.0792133	0.129053	0.539885	0.175139	0.373134	0.137389	0.0126958	0.00639198	0.258407	0.496069	0.137856	0.259115	0.165467	0.215022	0.256604	-0.120626	0.287514	0.472119	-0.059198	0.0558383	0.321238	0.310626	0.235484	0.192566	0.342198	-0.0878009	0.365295
0	0.239004	0.215478	0.3054	0.533187	0.0621808	0.0879908	0.1382	0.64247	0.205345	0.408212	0.112013	-0.0420178	0.00920693	0.298755	0.660367	0.355407	0.208126	0.616396	0.101715	0.30245	-0.151751	0.340896	0.548415	-0.0806109	0.046565	0.351439	-0.0305086	0.167635	-0.0584437	-0.13195	-0.201238	-0.0461316
0.048	0.320637	0.233005	0.306824	0.580528	0.0690775	0.132137	0.176368	0.71709	0.221717	0.449553	0.130578	-0.0421788	0.0440059	0.359506	0.710142	0.430765	0.259341	0.643721	0.0559628	0.401371	-0.303548	0.384	0.60711	-0.0810132	0.0739219	0.463342	-0.0351896	0.122844	-0.065406	-0.187765	-0.228135	-0.0605779
0.096	0.478079	0.353208	0.310527	0.667663	0.0852026	0.244644	0.265344	0.809708	0.263734	0.531927	0.172929	-0.0426079	0.139218	0.469629	0.803575	0.619667	0.337902	0.776065	0.0247064	0.558707	-0.403505	0.469893	0.68354	-0.0820845	0.134798	0.619647	-0.0474598	0.276102	-0.0807013	-0.300106	-0.284465	-0.0963171
0.144	0.621415	0.465856	0.316681	0.748149	0.107507	0.287688	0.380513	0.854979	0.324547	0.625303	0.226388	-0.0433433	0.245071	0.616922	0.889267	0.748438	0.386006	0.870853	-0.00218487	0.653114	-0.422735	0.559559	0.725294	-0.0838947	0.211815	0.731979	-0.0677498	0.402655	-0.100745	-0.424858	-0.35903	-0.221798
0.192	0.741732	0.524815	0.325356	0.80157	0.132203	0.3161	0.492149	0.877285	0.395494	0.711397	0.280925	-0.0444176	0.314711	0.693641	0.951247	0.82189	0.407257	0.944157	0.0628583	0.686925	-0.446901	0.635899	0.744671	-0.0864923	0.289952	0.791137	-0.0957174	0.37253	-0.122502	-0.538126	-0.443403	-0.31956
0.24	0.849069	0.625231	0.336528	0.830554	0.156128	0.387455	0.576799	0.903488	0.467362	0.782812	0.331548	-0.0458574	0.336427	0.792634	0.989561	0.864153	0.434229	0.982653	0.0983289	0.71141	-0.520554	0.705229	0.761919	-0.0899072	0.361109	0.801679	-0.130558	0.388633	-0.144611	-0.640627	-0.530082	-0.410917
0.288	0.937926	0.722218	0.349989	0.848354	0.176401	0.451737	0.632054	0.916907	0.531984	0.833024	0.374962	-0.0476744	0.309321	0.869677	1.01471	0.907206	0.476546	1.04	0.108839	0.752173	-0.605672	0.767354	0.780451	-0.0941221	0.418583	0.785421	-0.170972	0.410532	-0.166446	-0.734929	-0.609996	-0.486631
0.336	0.999579	0.73354	0.365407	0.863642	0.190735	0.518255	0.663559	0.917844	0.585659	0.858788	0.4092	-0.0498722	0.26718	0.841099	1.03926	0.985202	0.520008	1.10061	0.136083	0.810698	-0.691294	0.817899	0.801535	-0.0990951	0.458018	0.773492	-0.215445	0.441137	-0.18813	-0.821784	-0.675619	-0.527692
0.384	1.0361	0.77271	0.382393	0.880084	0.197236	0.593972	0.677515	0.918981	0.62842	0.862797	0.433074	-0.0524504	0.280558	0.847076	1.06282	1.07089	0.548988	1.12868	0.107727	0.866048	-0.774685	0.859775	0.821124	-0.104775	0.478847	0.773971	-0.262536	0.42521	-0.210288	-0.903016	-0.723866	-0.6089
0.432	1.04615	0.795197	0.400515	0.897843	0.194209	0.641147	0.683012	0.922472	0.661487	0.849969	0.445322	-0.0554047	0.283161	0.856269	1.08075	1.11429	0.56155	1.16587	0.0382857	0.900754	-0.818657	0.894863	0.830687	-0.111103	0.48318	0.78169	-0.311001	0.405875	-0.233523	-0.981598	-0.755209	-0.705174
0.48	1.03903	0.757971	0.41933	0.912105	0.180518	0.62706	0.685892	0.917202	0.686354	0.825341	0.44558	-0.0587279	0.268286	0.840861	1.09019	1.12525	0.558956	1.1828	-0.0112913	0.91046	-0.79619	0.921462	0.830957	-0.118011	0.474435	0.787599	-0.359842	0.349165	-0.258268	-1.06008	-0.772086	-0.810307
0.528	1.03052	0.772165	0.438414	0.917132	0.156184	0.614507	0.68579	0.896204	0.704506	0.793662	0.434723	-0.0624106	0.271728	0.795198	1.09075	1.13307	0.542581	1.17789	0.108396	0.904446	-0.740653	0.936794	0.824749	-0.12543	0.456305	0.78581	-0.408316	0.397016	-0.284732	-1.1393	-0.777941	-0.902895
0.576	1.02529	0.802549	0.457383	0.90888	0.12224	0.594349	0.680592	0.869806	0.717035	0.75838	0.414094	-0.0664421	0.264183	0.807963	1.08393	1.14583	0.513987	1.18349	0.103685	0.897467	-0.684305	0.939407	0.811414	-0.133289	0.432082	0.776907	-0.455892	0.24811	-0.312863	-1.21888	-0.776331	-1.0181
0.624	1.01594	0.763391	0.475902	0.885811	0.0804844	0.568711	0.668429	0.846094	0.724583	0.721397	0.385361	-0.0708107	0.192025	0.84523	1.07153	1.15993	0.476313	1.20118	0.0207513	0.892457	-0.64031	0.931167	0.790051	-0.141519	0.404044	0.760328	-0.502206	0.192625	-0.342364	-1.29801	-0.770219	-1.07572
0.672	0.993453	0.684411	0.493689	0.849355	0.0330691	0.546781	0.647741	0.827179	0.727616	0.683698	0.35042	-0.0755035	0.154263	0.775736	1.05484	1.17299	0.433216	1.22009	0.0156326	0.884395	-0.607798	0.913783	0.761634	-0.150049	0.373433	0.732784	-0.547024	0.168966	-0.372793	-1.37607	-0.761815	-1.04746
0.72	0.955779	0.613987	0.51052	0.802533	-0.017905	0.527503	0.617839	0.810519	0.726596	0.645877	0.311067	-0.0805072	0.183195	0.729667	1.0354	1.17779	0.387241	1.23315	-0.03812	0.864262	-0.579713	0.887381	0.728029	-0.158813	0.3409	0.693541	-0.590216	0.0292463	-0.403685	-1.45236	-0.752883	-1.04792
0.768	0.906522	0.497144	0.526224	0.749023	-0.0704403	0.503712	0.579175	0.790225	0.722005	0.608335	0.268904	-0.0858079	0.226844	0.697152	1.01497	1.16828	0.339809	1.22866	-0.0360106	0.824863	-0.549889	0.850938	0.691076	-0.167748	0.306939	0.645311	-0.63173	-0.0424565	-0.434609	-1.52618	-0.744929	-1.09071
0.816	0.851036	0.416831	0.540685	0.692356	-0.122708	0.463666	0.532868	0.763951	0.714344	0.571484	0.22536	-0.0913915	0.203105	0.615457	0.995272	1.14688	0.290755	1.20108	-0.0710156	0.767799	-0.513516	0.806181	0.652533	-0.176794	0.272018	0.591898	-0.671572	-0.0611911	-0.465192	-1.5968	-0.739178	-1.1103
0.864	0.796233	0.320004	0.553845	0.635537	-0.173117	0.414809	0.480761	0.729964	0.704127	0.535769	0.181609	-0.0972439	0.149447	0.519701	0.97762	1.12053	0.240009	1.16299	-0.080755	0.699706	-0.468746	0.758627	0.614675	-0.185897	0.236597	0.536959	-0.709786	-0.168681	-0.495141	-1.66358	-0.736546	-1.12047
0.912	0.748984	0.201092	0.565704	0.580969	-0.220449	0.363604	0.425813	0.688434	0.691825	0.50156	0.138537	-0.103351	0.0904046	0.41159	0.962847	1.09607	0.189617	1.13052	-0.0875831	0.62937	-0.419148	0.714898	0.579926	-0.195006	0.201149	0.484291	-0.746438	-0.287218	-0.524262	-1.72599	-0.737683	-1.19698
0.96	0.713796	0.112395	0.576311	0.530248	-0.263901	0.321325	0.371574	0.645916	0.677858	0.469085	0.0967339	-0.109698	0.0655243	0.330018	0.951536	1.07851	0.14275	1.11347	-0.113977	0.565567	-0.374471	0.679958	0.54989	-0.204075	0.166097	0.437113	-0.781608	-0.326911	-0.552437	-1.78371	-0.742994	-1.32021
1.008	0.692028	0.112498	0.585745	0.484007	-0.303112	0.29726	0.321272	0.610821	0.662592	0.438426	0.0565447	-0.116272	0.0706547	0.287843	0.943793	1.06885	0.101842	1.11278	-0.0785259	0.514252	-0.345321	0.655923	0.524958	-0.213066	0.131783	0.396899	-0.815381	-0.342591	-0.579617	-1.83652	-0.752667	-1.3701
1.056	0.6821	0.103901	0.594098	0.44209	-0.338128	0.284508	0.276991	0.586719	0.646334	0.40954	0.0181215	-0.12306	0.0798816	0.286738	0.939082	1.06437	0.0679299	1.12221	-0.0612601	0.477439	-0.336052	0.642154	0.504512	-0.22194	0.0984593	0.363204	-0.847839	-0.341008	-0.605796	-1.88432	-0.76668	-1.36347
1.104	0.681291	0.10106	0.601466	0.403853	-0.369279	0.2728	0.23966	0.572151	0.629337	0.382291	-0.0185214	-0.130048	0.0892826	0.238723	0.936605	1.06271	0.0411264	1.13615	-0.102596	0.454191	-0.343189	0.63651	0.487338	-0.230668	0.0662794	0.33469	-0.879062	-0.3521	-0.630998	-1.92716	-0.784796	-1.31746
1.152	0.686719	0.136155	0.607944	0.368457	-0.397091	0.262761	0.209234	0.564767	0.611811	0.356485	-0.0534509	-0.137225	0.0795624	0.252526	0.935589	1.06281	0.021011	1.15215	-0.133078	0.441836	-0.360056	0.635966	0.47217	-0.239222	0.0353208	0.309879	-0.909121	-0.335186	-0.655262	-1.96522	-0.806593	-1.33534
1.2	0.695673	0.120033	0.613621	0.335074	-0.422199	0.257969	0.184975	0.56202	0.593932	0.331918	-0.0867757	-0.144577	0.0971944	0.295235	0.935331	1.06366	0.00657837	1.16835	-0.146564	0.436951	-0.380557	0.637108	0.458009	-0.247578	0.00560147	0.287447	-0.938083	-0.356948	-0.678632	-1.99881	-0.831555	-1.43915
1.248	0.705854	0.110503	0.61858	0.303024	-0.445247	0.258152	0.165813	0.561432	0.575849	0.308407	-0.118624	-0.152093	0.110881	0.314951	0.935269	1.06414	-0.00359696	1.18296	-0.160225	0.436375	-0.400399	0.636969	0.444172	-0.255718	-0.022903	0.266415	-0.96601	-0.376372	-0.701155	-2.02827	-0.85914	-1.46654
1.296	0.715479	0.0701026	0.622898	0.271812	-0.466822	0.261983	0.150529	0.561118	0.55769	0.285798	-0.149126	-0.159762	0.120224	0.27924	0.935018	1.06338	-0.0109922	1.19478	-0.194852	0.437498	-0.416948	0.633425	0.43024	-0.263625	-0.0502438	0.246126	-0.992956	-0.311516	-0.722873	-2.05397	-0.888821	-1.4579
1.344	0.723318	0.0472108	0.626652	0.241117	-0.487414	0.267482	0.137891	0.559834	0.539567	0.26397	-0.178406	-0.167573	0.0769788	0.262284	0.934359	1.06095	-0.0168778	1.20324	-0.247456	0.438375	-0.428941	0.625231	0.416018	-0.271287	-0.0764868	0.226183	-1.01897	-0.315607	-0.74383	-2.07629	-0.920108	-1.51556
1.392	0.728659	0.0777466	0.629912	0.210763	-0.507395	0.271607	0.126775	0.556912	0.521576	0.24283	-0.206571	-0.175515	0.060919	0.294666	0.933208	1.05689	-0.0222225	1.20831	-0.304196	0.437718	-0.436294	0.61199	0.401488	-0.278694	-0.101704	0.206419	-1.0441	-0.312739	-0.764064	-2.0956	-0.95256	-1.55511
1.44	0.731281	0.0746568	0.632745	0.180674	-0.527033	0.271578	0.116224	0.552027	0.503798	0.222312	-0.233716	-0.183579	0.0800406	0.324943	0.931574	1.05152	-0.0277079	1.21027	-0.305281	0.434755	-0.439632	0.594017	0.386732	-0.285839	-0.125969	0.186804	-1.06839	-0.342909	-0.78361	-2.11226	-0.985792	-1.51477
1.488	0.731271	0.0157643	0.635213	0.150847	-0.546508	0.26617	0.105489	0.545127	0.486303	0.202372	-0.259922	-0.191755	0.0667088	0.321705	0.929517	1.04525	-0.0337594	1.20954	-0.281722	0.429119	-0.439866	0.572073	0.37187	-0.292719	-0.14935	0.167367	-1.09187	-0.427233	-0.802501	-2.1266	-1.01948	-1.51832
1.536	0.728862	-0.0177756	0.637363	0.121321	-0.565937	0.255207	0.0940352	0.536377	0.469147	0.182983	-0.285258	-0.200034	0.0604399	0.28696	0.927121	1.03843	-0.0405907	1.20658	-0.271694	0.420718	-0.437941	0.547137	0.357024	-0.29933	-0.171911	0.148173	-1.11458	-0.478855	-0.820767	-2.13894	-1.05334	-1.57308
1.584	0.72436	-0.0398446	0.639231	0.0921648	-0.585395	0.239121	0.0815288	0.526049	0.452377	0.164129	-0.309784	-0.208409	0.0478961	0.246827	0.92448	1.03127	-0.0482575	1.20191	-0.270605	0.409651	-0.434733	0.520191	0.342305	-0.305673	-0.193708	0.129301	-1.13654	-0.586284	-0.838434	-2.14955	-1.08716	-1.59102
1.632	0.718089	-0.0279418	0.64084	0.06346	-0.604931	0.218811	0.0678081	0.514539	0.436031	0.145806	-0.333549	-0.216873	0.0139242	0.22431	0.921686	1.02393	-0.0567151	1.19606	-0.275369	0.396164	-0.43099	0.49217	0.327801	-0.31175	-0.214791	0.110832	-1.15779	-0.57695	-0.855528	-2.15871	-1.12076	-1.67944
1.68	0.710334	-0.0606482	0.642202	0.0352907	-0.624576	0.195412	0.052843	0.502347	0.420135	0.128011	-0.356598	-0.225417	-0.0189979	0.210738	0.918822	1.0165	-0.0658686	1.18951	-0.274709	0.380606	-0.427315	0.46391	0.313582	-0.317564	-0.235202	0.0928395	-1.17836	-0.564918	-0.872072	-2.16662	-1.154	-1.76743
1.728	0.701328	-0.125287	0.643322	0.00773897	-0.644339	0.170118	0.0366913	0.490007	0.404709	0.110746	-0.37897	-0.234035	-0.0281532	0.178245	0.915956	1.00901	-0.0755978	1.18262	-0.27235	0.363373	-0.42416	0.436095	0.299696	-0.323119	-0.254979	0.0753813	-1.19827	-0.612632	-0.888086	-2.17349	-1.18677	-1.82933
1.776	0.691263	-0.190865	0.644202	-0.0191199	-0.664224	0.144064	0.0194676	0.478012	0.389764	0.0940114	-0.400697	-0.24272	-0.0148068	0.125374	0.913138	1.0015	-0.0857723	1.17568	-0.271868	0.344867	-0.421828	0.409241	0.286178	-0.328421	-0.274154	0.0584984	-1.21753	-0.677778	-0.90359	-2.17947	-1.21899	-1.8261
1.824	0.680301	-0.275879	0.644843	-0.0452207	-0.684223	0.118253	0.00132046	0.466746	0.375306	0.0778052	-0.421808	-0.251467	-0.00412789	0.101006	0.910406	0.993982	-0.0962646	1.16887	-0.274555	0.325458	-0.420507	0.383696	0.27305	-0.333476	-0.292755	0.0422145	-1.23619	-0.746448	-0.918604	-2.18473	-1.25058	-1.75037
1.872	0.668582	-0.310284	0.645238	-0.0705098	-0.704328	0.0934819	-0.0175894	0.456479	0.361338	0.062125	-0.442332	-0.26027	-0.0387047	0.0771052	0.907781	0.986468	-0.106961	1.1623	-0.284031	0.30548	-0.420291	0.359645	0.260325	-0.33829	-0.310807	0.0265405	-1.25425	-0.820186	-0.933143	-2.18937	-1.28151	-1.74442
1.92	0.656225	-0.297378	0.645368	-0.094946	-0.724521	0.0703197	-0.0371044	0.447359	0.347856	0.046966	-0.46229	-0.269123	-0.0722829	0.0562459	0.905276	0.978987	-0.117765	1.15602	-0.237053	0.285212	-0.421194	0.337147	0.248007	-0.342871	-0.328332	0.0114773	-1.27173	-0.89723	-0.947226	-2.19349	-1.31172	-1.82978
1.968	0.643332	-0.320399	0.645205	-0.1185	-0.744783	0.0491082	-0.057077	0.439421	0.334855	0.0323215	-0.481705	-0.278021	-0.0683125	0.04388	0.902896	0.971555	-0.1286	1.15003	-0.234234	0.26488	-0.423167	0.31617	0.236098	-0.347227	-0.345349	-0.00298204	-1.28866	-0.974523	-0.960866	-2.19719	-1.34119	-1.88697
2.016	0.629997	-0.329802	0.644717	-0.141156	-0.765084	0.0299847	-0.0773726	0.432616	0.322326	0.0181828	-0.500596	-0.286958	-0.0686406	0.0140824	0.90064	0.964181	-0.139403	1.1443	-0.253779	0.244661	-0.426118	0.296615	0.224595	-0.351365	-0.361878	-0.0168503	-1.30505	-1.01125	-0.97408	-2.20054	-1.36991	-1.89018
2.064	0.616305	-0.237846	0.643876	-0.162905	-0.785392	0.0129292	-0.09787	0.426841	0.31026	0.00454014	-0.518982	-0.29593	-0.064832	-0.0153096	0.898502	0.95687	-0.150125	1.13881	-0.227473	0.224693	-0.429927	0.278339	0.213491	-0.355293	-0.377934	-0.0301434	-1.32093	-0.996603	-0.98688	-2.20358	-1.39786	-1.88792
2.112	0.602338	-0.230356	0.64266	-0.183749	-0.80567	-0.00218676	-0.118462	0.421959	0.298645	-0.00861772	-0.53688	-0.30493	-0.00981746	-0.0534287	0.896476	0.949621	-0.160728	1.1335	-0.23393	0.205077	-0.434463	0.261188	0.202779	-0.35902	-0.393533	-0.0428797	-1.3363	-0.963821	-0.999281	-2.20637	-1.42504	-1.92739
2.16	0.588178	-0.254055	0.64106	-0.203699	-0.825874	-0.015562	-0.139054	0.417811	0.287469	-0.0213028	-0.554304	-0.313955	0.0192192	-0.0297667	0.894553	0.942431	-0.171184	1.12836	-0.246894	0.185888	-0.439589	0.245012	0.192449	-0.362553	-0.408689	-0.0550789	-1.35119	-0.977824	-1.0113	-2.20894	-1.45145	-2.02956
2.208	0.573904	-0.213287	0.639077	-0.222768	-0.845964	-0.0274225	-0.159562	0.414242	0.276718	-0.0335279	-0.57127	-0.322999	0.00441425	0.00683778	0.892725	0.935301	-0.181471	1.12335	-0.24781	0.16718	-0.445171	0.22968	0.182491	-0.3659	-0.423416	-0.0667613	-1.3656	-0.984379	-1.02294	-2.21133	-1.47709	-2.08101
2.256	0.55959	-0.210143	0.636729	-0.240979	-0.865898	-0.0379885	-0.179911	0.41111	0.266379	-0.0453061	-0.587792	-0.332057	0.0092086	0.0154401	0.890984	0.928238	-0.191575	1.11848	-0.237346	0.148988	-0.451082	0.215075	0.172893	-0.36907	-0.437728	-0.0779472	-1.37956	-0.982602	-1.03421	-2.21356	-1.50197	-2.01674
2.304	0.545308	-0.230395	0.634039	-0.258354	-0.885635	-0.047457	-0.200038	0.408295	0.256439	-0.0566511	-0.603883	-0.341124	-0.0160011	-0.0209916	0.889322	0.92125	-0.201484	1.11373	-0.18959	0.131336	-0.45721	0.201105	0.163646	-0.37207	-0.451635	-0.0886567	-1.39308	-0.951796	-1.04514	-2.21565	-1.52609	-1.96657
2.352	0.531123	-0.271158	0.631045	-0.274919	-0.905139	-0.0559943	-0.219886	0.405698	0.246884	-0.0675765	-0.619555	-0.350195	-0.0359997	-0.0504984	0.887733	0.91435	-0.211191	1.10911	-0.205465	0.114239	-0.463457	0.187694	0.154736	-0.374909	-0.465151	-0.0989092	-1.40617	-1.00548	-1.05573	-2.21762	-1.54948	-2.01088
2.4	0.517091	-0.303768	0.627789	-0.290704	-0.924376	-0.0637379	-0.239408	0.403244	0.2377	-0.0780961	-0.634819	-0.359265	-0.0685756	-0.0629903	0.88621	0.90755	-0.220694	1.10462	-0.195003	0.0977033	-0.469741	0.174784	0.146152	-0.377593	-0.478287	-0.108723	-1.41885	-0.986478	-1.06599	-2.21947	-1.57215	-2.08927
2.448	0.503262	-0.332687	0.624321	-0.305737	-0.943317	-0.0708023	-0.258562	0.400881	0.228874	-0.0882236	-0.649689	-0.368329	-0.098664	-0.0315257	0.88475	0.900865	-0.229991	1.10028	-0.237927	0.081729	-0.475991	0.162331	0.137884	-0.38013	-0.491053	-0.118117	-1.43113	-1.0083	-1.07593	-2.22123	-1.59411	-2.13142
2.496	0.489678	-0.33289	0.620696	-0.320048	-0.961934	-0.0772828	-0.277316	0.398575	0.220393	-0.0979723	-0.664173	-0.377382	-0.0966502	-0.0422614	0.883346	0.894308	-0.239082	1.09608	-0.28939	0.0663129	-0.482155	0.1503	0.12992	-0.382527	-0.503461	-0.127108	-1.44302	-1.0157	-1.08556	-2.2229	-1.61537	-2.14196
2.544	0.476374	-0.348825	0.616973	-0.333667	-0.980205	-0.083257	-0.295642	0.396305	0.212243	-0.107356	-0.678283	-0.38642	-0.156548	-0.0528421	0.881997	0.887893	-0.247971	1.09204	-0.255086	0.0514481	-0.488187	0.138669	0.122249	-0.384791	-0.51552	-0.135713	-1.45453	-1.02478	-1.09489	-2.22449	-1.63596	-2.14002
2.592	0.463377	-0.377707	0.613208	-0.346625	-0.998107	-0.0887866	-0.313519	0.394063	0.204414	-0.116386	-0.692028	-0.395437	-0.19524	-0.0582604	0.880698	0.881629	-0.256659	1.08814	-0.266873	0.0371251	-0.494056	0.127419	0.114861	-0.38693	-0.527241	-0.143947	-1.46568	-1.1157	-1.10393	-2.22601	-1.65589	-2.13748
2.64	0.450709	-0.396392	0.609453	-0.35895	-1.01562	-0.0939203	-0.330929	0.391845	0.196891	-0.125078	-0.705419	-0.40443	-0.187268	-0.0789491	0.879447	0.875526	-0.26515	1.08441	-0.264245	0.0233323	-0.499737	0.116542	0.107746	-0.388948	-0.538633	-0.151826	-1.47648	-1.13081	-1.11269	-2.22745	-1.67517	-2.21302
2.688	0.438387	-0.415717	0.60575	-0.37067	-1.03274	-0.0986961	-0.347862	0.389655	0.189664	-0.133441	-0.718464	-0.413394	-0.191018	-0.0988424	0.878241	0.86959	-0.273449	1.08084	-0.25585	0.0100568	-0.505213	0.106028	0.100894	-0.390853	-0.549705	-0.159364	-1.48694	-1.13625	-1.12118	-2.22883	-1.69384	-2.27223
2.736	0.438387	-0.415717	0.60575	-0.37067	-1.03274	-0.0986961	-0.347862	0.389655	0.189664	-0.133441	-0.718464	-0.413394	-0.191018	-0.0988424	0.878241	0.86959	-0.273449	1.08084	-0.25585	0.0100568	-0.505213	0.106028	0.100894	-0.390853	-0.549705	-0.159364	-1.48694	-1.13625	-1.12118	-2.22883	-1.69384	-2.27223
2.784	0.438387	-0.415717	0.60575	-0.37067	-1.03274	-0.0986961	-0.347862	0.389655	0.189664	-0.133441	-0.718464	-0.413394	-0.191018	-0.0988424	0.878241	0.86959	-0.273449	1.08084	-0.25585	0.0100568	-0.505213	0.106028	0.100894	-0.390853	-0.549705	-0.159364	-1.48694	-1.13625	-1.12118	-2.22883	-1.69384	-2.27223
2.832	0.438387	-0.415717	0.60575	-0.37067	-1.03274	-0.0986961	-0.347862	0.389655	0.189664	-0.133441	-0.718464	-0.413394	-0.191018	-0.0988424	0.878241	0.86959	-0.273449	1.08084	-0.25585	0.0100568	-0.505213	0.106028	0.100894	-0.390853	-0.549705	-0.159364	-1.48694	-1.13625	-1.12118	-2.22883	-1.69384	-2.27223
2.88	0.438387	-0.415717	0.60575	-0.37067	-1.03274	-0.0986961	-0.347862	0.389655	0.189664	-0.133441	-0.718464	-0.413394	-0.191018	-0.0988424	0.878241	0.86959	-0.273449	1.08084	-0.25585	0.0100568	-0.505213	0.106028	0.100894	-0.390853	-0.549705	-0.159364	-1.48694	-1.13625	-1.12118	-2.22883	-1.69384	-2.27223
2.928	0.438387	-0.415717	0.60575	-0.37067	-1.03274	-0.0986961	-0.347862	0.389655	0.189664	-0.133441	-0.718464	-0.413394	-0.191018	-0.0988424	0.878241	0.86959	-0.273449	1.08084	-0.25585	0.0100568	-0.505213	0.106028	0.100894	-0.390853	-0.549705	-0.159364	-1.48694	-1.13625	-1.12118	-2.22883	-1.69384	-2.27223
2.976	0.438387	-0.415717	0.60575	-0.37067	-1.03274	-0.0986961	-0.347862	0.389655	0.189664	-0.133441	-0.718464	-0.413394	-0.191018	-0.0988424	0.878241	0.86959	-0.273449	1.08084	-0.25585	0.0100568	-0.505213	0.106028	0.100894	-0.390853	-0.549705	-0.159364	-1.48694	-1.13625	-1.12118	-2.22883	-1.69384	-2.27223

## Sheet: DG Impulse
0	524201	524202	523701	523302	523502	523901	523301	524203	524102	523801	524002	523401	523601	523402	523501	523702	524101	524003	524001	659202	523602	659201
-0.48	-0.219996	0.218943	-0.0890288	-0.0143919	-0.0747444	-0.0909728	-0.0255998	-0.00295387	-0.0739438	-0.0523036	0.0612127	-0.175778	-0.0984834	-0.06239	-0.0237126	0.16162	0.206593	-0.0308136	0.118486	0.202204	0.0922982	0.308322
-0.432	-0.199103	0.250451	-0.0887928	-0.0330024	-0.0765655	-0.0523844	-0.0446423	0.0585655	-0.0798847	0.036146	0.0501514	-0.181507	-0.112984	-0.0225085	-0.0425593	0.160885	0.22116	-0.0157752	0.137961	0.233801	0.0642442	0.328187
-0.384	-0.121624	0.289321	-0.0219618	-0.0480307	-0.0129512	0.0121369	-0.0504764	0.131834	-0.0397944	0.031734	0.0346748	-0.0677221	0.00234112	-0.00555516	-0.0457118	0.160169	0.235709	-0.000775725	0.159923	0.267752	0.0286203	0.336037
-0.336	-0.0438343	0.34358	0.0204507	-0.0575302	-0.0460602	0.0937446	-0.0390577	0.040597	-0.0315373	-0.0820319	0.00716825	-0.00676566	-0.219941	0.0113679	-0.0699647	0.162942	0.250747	0.00420662	0.186347	0.304207	-0.0355231	0.320723
-0.288	-0.0365989	0.420093	0.0290126	-0.0549425	0.00481237	0.188595	-0.0156134	0.0907071	-0.0220693	0.0101038	-0.0191121	-0.0118454	-0.267897	0.0192006	-0.0930886	0.17976	0.267083	0.0263479	0.221797	0.344481	-0.0477615	0.27012
-0.24	-0.0678145	0.521044	0.00183557	-0.0248678	0.0622334	0.302886	0.01507	0.0508258	-0.0413448	0.0552528	-0.0223439	-0.108404	-0.441262	-0.0260863	-0.121621	0.223126	0.285366	0.100519	0.271438	0.388795	0.0879467	0.250923
-0.192	0.110904	0.640471	0.0375537	0.0550811	0.122516	0.442715	0.0663949	0.217649	0.0153612	0.207506	-0.0113548	-0.194947	0.0996924	-0.106967	0.00064819	0.274201	0.305296	0.153251	0.338742	0.434037	0.112971	0.300303
-0.144	0.26499	0.766822	-0.03903	0.226541	-0.0829731	0.601661	0.196842	-0.0535558	-0.0845518	-0.138769	0.0155337	-0.185394	-0.677265	-0.157924	-0.077913	0.274804	0.326055	0.0425741	0.424573	0.471262	0.37715	0.513923
-0.096	0.443358	0.88233	-0.186546	0.552986	0.163193	0.767201	0.536237	0.244835	0.146116	0.261123	0.207494	0.0284634	0.503859	0.156992	0.150123	0.125112	0.346419	-0.130802	0.52474	0.48999	1.30181	0.932779
-0.048	0.435392	0.959336	0.163395	1.04382	-0.413457	0.911133	1.20203	-1.27301	-0.633483	-1.64245	0.961537	0.289999	-3.25219	1.52854	-0.647097	-0.323604	0.362717	0.191978	0.620529	0.484078	1.81231	0.846221
0	7.59893	0.976638	4.14089	1.53731	3.88055	0.996253	2.09929	6.27544	6.17426	6.02716	2.54216	7.48825	10.2183	4.43438	6.03222	-1.03883	0.370754	3.62494	0.68135	0.459762	-7.84542	-2.39273
0.048	3.98483	3.55496	3.01838	1.51586	7.1053	0.375338	2.24988	3.65493	4.84421	2.81871	1.53956	1.37858	1.74525	0.307992	3.02928	-3.51552	0.0512295	0.763136	2.02079	4.54372	-6.17345	1.51049
0.096	5.33723	3.32375	4.51853	2.99523	12.7296	0.870291	5.68997	5.92519	6.27772	5.32529	3.33068	2.62242	3.32886	0.736556	5.37188	0.609977	0.0891814	1.72823	2.72574	0.898563	-5.29088	0.541396
0.144	2.19739	1.37476	2.06408	3.0205	7.35444	1.1606	4.14702	3.49466	3.93098	5.52383	4.27463	2.42353	2.39599	1.0703	4.98318	0.957404	0.0799066	2.3557	-0.14532	0.390457	-2.93178	-0.688058
0.192	-0.265013	-2.15118	0.441689	2.24695	4.78809	1.27642	1.25218	2.51804	2.71738	4.95985	4.6772	1.85062	1.42392	1.31361	4.05767	-2.24619	0.148986	2.71515	1.06035	-1.95264	-3.96807	-1.54723
0.24	1.58376	0.113123	1.46853	1.5877	6.65628	1.31328	2.28129	3.48358	2.66691	4.50535	4.83833	1.59336	1.68401	1.48565	3.61041	-2.01373	0.296089	2.88943	2.21754	-0.0331776	-3.90431	-1.74033
0.288	1.30318	0.929671	2.87126	1.45492	5.60014	1.27279	2.48663	3.81955	2.42913	4.11568	4.73221	1.41376	2.20045	1.56164	3.13732	0.770916	0.402183	2.85694	1.06408	-0.0692449	-3.30565	-1.19706
0.336	-0.0995055	0.762006	3.3103	1.45094	4.77674	1.17667	1.9966	3.26108	2.20611	3.9719	4.40459	1.37299	2.0808	1.54196	2.99755	0.552506	0.409336	2.66711	0.62707	0.760631	-4.88565	-0.108157
0.384	0.43674	-0.476107	2.42984	1.2918	3.85072	1.0712	0.670516	2.20312	1.78655	3.81914	3.97158	1.46401	1.67485	1.44289	2.94975	-0.695778	0.335744	2.4172	0.790253	0.194632	-5.41045	0.192969
0.432	1.43252	-0.425858	1.64074	1.07798	3.64196	0.953412	1.76517	1.55951	1.15563	3.49994	3.52248	1.50255	1.355	1.28599	2.72437	-0.799894	0.213777	2.14445	0.69785	0.581389	-3.88387	-0.572553
0.48	0.906985	-0.958293	1.68825	0.827119	4.15889	0.802592	1.37404	1.45016	0.837426	3.00856	3.11281	1.37067	1.20275	1.09593	2.27841	-0.669356	0.072822	1.85333	0.257543	-0.537719	-3.49721	-1.39784
0.528	0.353307	-0.733234	1.74259	0.532534	2.81673	0.621585	1.11046	1.26249	0.914376	2.19941	2.72494	1.14997	1.12764	0.8906	1.75758	-0.39989	-0.0632386	1.52034	-0.270204	-0.80043	-1.21577	-1.58487
0.576	0.505866	-0.0591563	1.3461	0.210702	1.73067	0.413732	0.98179	0.697364	0.989629	1.38018	2.29539	0.916155	1.08749	0.677907	1.2962	-0.038951	-0.178578	1.13321	-0.601926	-1.14945	-0.220719	-1.42819
0.624	0.697681	-0.453007	0.866166	-0.107909	1.57928	0.177546	0.179318	0.276747	0.85157	1.12583	1.78077	0.653195	1.04097	0.458043	0.996847	0.0241577	-0.268307	0.686414	-0.652093	-0.618781	-1.9752	-1.12178
0.672	0.207492	-1.0094	0.693012	-0.379034	1.06542	-0.081647	0.162516	0.0612598	0.61611	1.32022	1.17865	0.352641	0.947325	0.226469	0.843404	-0.101929	-0.332422	0.197638	-0.672985	-0.980604	-1.15181	-0.767662
0.72	0.0796028	-1.09937	0.620107	-0.585319	0.9923	-0.351365	0.238971	-0.232871	0.375753	1.09991	0.513189	0.0698993	0.802013	-0.00634414	0.603688	-0.192101	-0.373204	-0.29537	-0.796359	-0.524976	-0.0813067	-0.546589
0.768	0.229504	-1.25408	0.370002	-0.72185	-0.176037	-0.617046	-1.26261	-0.637109	0.0847306	0.20024	-0.175531	-0.162475	0.610091	-0.221875	0.132798	-0.16443	-0.39492	-0.74984	-0.872344	-0.322888	-0.178435	-0.590982
0.816	0.0589685	-0.88228	-0.0518114	-0.785396	-1.3342	-0.856856	-2.05519	-1.04733	-0.258116	-0.804366	-0.817708	-0.343273	0.419237	-0.406387	-0.632087	-0.215169	-0.401067	-1.11696	-0.941079	-0.956166	-0.573887	-0.83251
0.864	-0.359815	-0.576678	-0.515537	-0.786019	-1.91736	-1.04551	-0.328522	-1.44604	-0.572449	-1.50981	-1.3283	-0.463574	0.2573	-0.546379	-1.50323	-0.522184	-0.394944	-1.36974	-1.09975	-1.25172	0.0203347	-1.08342
0.912	-0.833303	-1.20755	-0.829613	-0.740038	-4.13781	-1.17312	-1.60528	-1.66362	-0.795475	-2.09682	-1.6508	-0.524421	0.124049	-0.627758	-2.13931	-0.905838	-0.379493	-1.50534	-1.27685	-1.09988	0.148309	-1.21376
0.96	-1.13165	-2.43629	-0.763307	-0.658583	-4.95297	-1.2259	-5.30969	-1.55444	-0.887901	-2.4759	-1.77214	-0.53506	0.0374201	-0.634085	-2.03027	-0.927637	-0.3568	-1.5073	-1.33636	-1.91671	0.843919	-1.20182
1.008	-0.966971	-2.36871	-0.348926	-0.549412	-1.55535	-1.19321	-2.73197	-1.12951	-0.847909	-2.09327	-1.70614	-0.5052	0.0186686	-0.571417	-1.14085	-0.550713	-0.3292	-1.36271	-1.18411	-3.44035	2.6344	-1.04868
1.056	-0.477598	-0.872399	0.131477	-0.427343	1.30269	-1.08963	0.41142	-0.580112	-0.734779	-1.07408	-1.48712	-0.452398	0.0484601	-0.464913	-0.26973	-0.237696	-0.299493	-1.1209	-0.908082	-0.66235	1.47412	-0.791247
1.104	-0.0397024	0.0618275	0.484589	-0.306231	0.592589	-0.930901	-0.937006	-0.112093	-0.607341	-0.0107902	-1.16351	-0.391455	0.0919794	-0.32691	0.173993	-0.155366	-0.269893	-0.839861	-0.649689	0.262357	-2.50147	-0.517433
1.152	0.281888	0.1575	0.665773	-0.194477	0.0215884	-0.724597	-0.843891	0.211538	-0.493709	0.922403	-0.782495	-0.328572	0.133841	-0.166789	0.364944	-0.137067	-0.241798	-0.561285	-0.454773	0.2981	-3.20028	-0.290003
1.2	0.472232	0.040046	0.693365	-0.0984094	0.409927	-0.493665	0.579107	0.411931	-0.407015	1.61902	-0.385377	-0.268321	0.167736	-0.0158244	0.157698	-0.10891	-0.216082	-0.300834	-0.316849	0.853146	-1.17709	-0.125791
1.248	0.515914	-0.0968542	0.596256	-0.0224002	0.472303	-0.278353	0.902421	0.518266	-0.349738	1.72593	-0.00695154	-0.215212	0.189089	0.0996725	-0.143191	-0.100008	-0.193077	-0.061978	-0.229807	0.986801	-1.0941	-0.0241743
1.296	0.465418	-0.285759	0.42158	0.030975	-0.0564086	-0.115798	-0.978873	0.549657	-0.318954	1.43627	0.322928	-0.171588	0.196978	0.173413	-0.459746	-0.113604	-0.172707	0.137102	-0.190705	0.121415	-1.06351	0.0221014
1.344	0.372734	-0.521748	0.219567	0.0621138	-0.558173	-0.0303379	-1.2899	0.517957	-0.308436	1.11121	0.582066	-0.137589	0.193176	0.207233	-0.814107	-0.130511	-0.154751	0.280051	-0.188121	-0.363748	-0.549358	0.0255841
1.392	0.251192	-0.676874	0.0277776	0.0724078	-0.527906	-0.0291485	0.0021114	0.439977	-0.309951	0.868873	0.758622	-0.112551	0.180141	0.203888	-0.756026	-0.153164	-0.138959	0.353259	-0.208963	0.0138077	-0.847657	0.00133246
1.44	0.11421	-0.677048	-0.133655	0.0643423	-0.191719	-0.0975754	0.498135	0.334045	-0.315913	0.622937	0.850841	-0.0953475	0.160809	0.16619	-0.325489	-0.185204	-0.125076	0.368558	-0.240798	0.232355	-1.06736	-0.0368493
1.488	-0.0162561	-0.557056	-0.262461	0.0413275	0.0749903	-0.212835	-0.584293	0.217763	-0.320816	0.251909	0.867364	-0.0843427	0.138299	0.103042	-0.0112045	-0.223289	-0.112865	0.35625	-0.273197	-0.0342428	-0.264134	-0.0798072

## Sheet: CA3 Impulse
0	719301	521501	659105	580601	526202	525403	525101	521602	719001	520901	719103	521202	525404	719002	520701	525003	521502	521101	719303	719201	525301	525001	659101	521401	580201	580501	521302	520702	521303	521102	521304	719202
-0.48	0.321578	0.226411	0.332726	0.241248	0.166872	0.186783	0.335073	0.0419706	0.00881997	0.345412	0.444288	-0.108053	0.237203	0.0920401	0.32688	0.141908	0.376267	0.0589769	0.120758	0.260906	0.245697	0.776161	0.325848	0.190559	0.223672	0.429797	-0.0543991	0.0579163	0.205189	0.109839	0.146532	-0.0469361
-0.432	0.36976	0.0578814	0.318825	0.337516	0.182312	0.240592	0.370467	0.0567158	-0.00505941	0.427911	0.466764	-0.0841608	0.265338	0.16758	0.337309	0.273177	0.447869	0.0941183	0.11429	0.295626	0.255797	0.763633	0.302198	0.240629	0.227989	0.460037	-0.101685	0.0700239	0.32108	0.189223	0.222123	-0.0606708
-0.384	0.414439	-0.0384476	0.278486	0.34909	0.179594	0.28464	0.400517	0.070155	-0.0249866	0.466645	0.467732	-0.019382	0.297056	0.204836	0.334177	0.129915	0.490342	0.117546	0.100619	0.19893	0.259559	0.673526	0.176483	0.302812	0.211356	0.473884	-0.10828	0.0339893	0.224907	0.230338	0.252622	-0.076321
-0.336	0.45101	0.0721759	0.243612	0.415015	0.177288	0.329218	0.376699	0.081465	-0.0520471	0.451684	0.433898	0.0722004	0.343209	0.224308	0.365375	0.331742	0.482741	0.118432	0.0775555	0.1398	0.253695	0.639957	0.0589425	0.371661	0.207739	0.468038	-0.0980231	-0.0064998	0.286437	0.193832	0.245707	-0.0939538
-0.288	0.473464	0.193246	0.249414	0.481525	0.176101	0.395682	0.29551	0.0892518	-0.087309	0.408033	0.349373	0.155774	0.413527	0.188919	0.267268	0.155043	0.454803	0.05817	0.0411616	0.103764	0.235699	0.622049	0.0686266	0.432884	0.254912	0.476612	-0.119075	-0.00336875	0.178649	0.0821844	0.225522	-0.116328
-0.24	0.467971	0.231176	0.328331	0.610176	0.203045	0.505764	0.294494	0.0921199	-0.131339	0.41697	0.199038	0.210977	0.514506	0.198153	0.222077	0.594748	0.463433	-0.0295215	-0.013481	0.0960411	0.204237	0.691687	0.235766	0.451115	0.356808	0.583235	-0.128271	0.09864	0.367301	0.0251056	0.296411	-0.147925
-0.192	0.401068	0.371956	0.514279	0.642643	0.519735	0.64027	0.548779	0.0905755	-0.183495	0.603401	-0.0280991	0.212372	0.621626	0.265912	0.353991	-0.193239	0.592912	0.0496805	-0.090463	-0.096051	0.158985	0.889316	0.579895	0.362098	0.456148	0.800496	-0.0187363	0.144214	0.189974	0.0955972	0.34261	-0.195596
-0.144	0.21037	0.969797	0.799872	0.875	1.14871	0.681454	1.12771	0.0842353	-0.241336	1.06084	-0.329484	0.0536441	0.617712	0.582038	0.591902	1.10538	0.959878	0.490825	-0.192255	0.418375	0.10149	1.77488	1.03983	0.0694412	0.419566	0.89585	0.249773	0.206333	0.60692	0.374757	0.600879	-0.265718
-0.096	-0.17915	1.7064	0.836915	1.65229	1.31763	0.365526	1.54856	0.0734269	-0.300274	1.4742	-0.686315	-0.431834	0.288525	1.21903	0.808582	-1.14459	1.33054	0.92693	-0.312387	-0.128923	0.0362565	2.49353	0.871279	-0.516579	0.0625755	0.376698	0.441822	0.554844	0.167342	0.747569	1.23226	-0.352882
-0.048	-0.788638	0.399547	-0.277922	3.2296	-0.129468	-0.639352	0.233118	0.0616595	-0.352793	0.329064	-1.04765	-1.34958	-0.565488	1.35708	2.12721	7.84722	0.572008	-0.325709	-0.431659	2.80424	-0.0270393	3.58592	-1.59488	-1.35793	-0.748767	-1.26853	-0.650754	0.652762	3.30958	-0.0260235	1.28961	-0.439198
0	-1.45522	-10.064	-3.82559	-10.4748	-5.29431	-2.21754	-4.21349	0.0519065	-0.387391	-5.1698	-1.31087	-2.49185	-1.75283	-5.9678	-6.04364	-13.6369	-3.71838	-6.22294	-0.518429	-8.94574	-0.071447	-9.12949	-6.99666	-2.1531	-1.79421	-3.73922	-5.32178	-5.17319	-6.17965	-5.32046	-5.1754	-0.499344
0.048	-1.15737	-2.06004	-0.059015	-0.113889	-0.416835	0.138451	0.822836	-3.52959	-0.916141	-0.210002	-0.0370474	-5.30902	-0.148187	-2.57314	-2.25017	-2.61639	-0.0139686	-5.61425	-3.37303	-2.31735	0.731084	-0.144481	-0.871184	-1.76878	-0.175442	-0.0716224	-4.76489	-4.03161	-0.478128	-2.67538	-0.235911	-9.85612
0.096	1.43011	-1.68781	-0.15505	-0.281349	-0.678108	0.317585	1.20995	1.44278	-1.56429	-0.537034	-0.0940555	-2.78419	2.34958	-1.18453	-2.08841	-4.24131	-0.091681	-4.82622	1.10675	-3.59566	-0.062522	-0.378789	-1.58571	-2.55145	-0.433445	-0.185635	-2.60625	-4.75465	-0.927237	-3.6259	-0.551704	-6.49038
0.144	0.342759	-1.56406	-0.260391	-0.423158	-0.715237	0.447453	0.690777	0.517941	-1.19754	-0.853382	-0.15606	-0.905437	-0.653022	-1.34582	-1.19752	-4.02787	-0.251128	-1.34735	0.902871	-3.06356	0.716236	-0.615537	-1.63613	-1.02774	-0.674404	-0.30477	-1.37762	-3.56024	-1.05995	-2.78065	-0.810182	-5.38179
0.192	1.07864	-1.40622	-0.367758	-0.524069	-0.732725	0.518278	-0.0023619	-0.489454	-0.460701	-1.12836	-0.220271	-3.38013	-0.840789	-1.48853	-1.54293	-3.30709	-0.466492	-0.787487	-2.46505	-2.52538	1.45036	-0.839029	-1.34939	-0.383425	-0.882323	-0.422611	-1.32147	-3.72442	-1.03823	-2.29	-1.04152	-4.71227
0.24	1.33302	-0.821355	-0.471628	-0.593981	-0.710354	0.525845	-0.444695	2.4166	-0.0712379	-1.35719	-0.28416	-3.0705	-0.373135	-1.02785	-1.2869	-2.8408	-0.68914	-2.30099	0.146734	-2.10228	0.979977	-1.03204	-1.13244	-0.963825	-1.05406	-0.534047	-0.978584	-4.6938	-1.06584	-2.30944	-1.29054	-4.17527
0.288	-0.095378	-0.610435	-0.564381	-0.637292	-0.668865	0.464225	-0.64284	1.347	-0.00170563	-1.53277	-0.344013	-2.02136	-2.39061	-0.441703	-0.906442	-2.76854	-0.873703	-2.42081	0.433503	-1.40316	1.13184	-1.17512	-1.06761	-2.03445	-1.17955	-0.629478	-0.354095	-4.13223	-1.14811	-2.1201	-1.5503	-3.6378
0.336	-0.0210868	-0.71771	-0.64052	-0.659717	-0.657781	0.339584	-0.780439	0.789843	-0.0180716	-1.65979	-0.39767	-1.58741	-1.64264	-1.25088	-0.959238	-2.8233	-1.00873	-1.75001	-2.08287	-0.88673	-1.37572	-1.27246	-1.02314	0.271526	-1.25695	-0.703901	-0.428057	-3.09673	-1.23625	-1.81663	-1.79714	-3.08507
0.384	-2.05607	-1.11012	-0.698241	-0.670824	-0.663605	0.171559	-0.927441	1.34869	-0.0776689	-1.7473	-0.444327	-1.04706	-1.27832	-1.16406	-0.988431	-2.50117	-1.10167	-1.56953	-1.24076	-0.762907	0.591457	-1.33691	-0.940165	0.173682	-1.29335	-0.756716	-0.967506	-2.7569	-1.31379	-1.66429	-2.00734	-2.4609
0.432	-0.321127	-1.42389	-0.736722	-0.678805	-0.656836	-0.0164797	-0.98057	0.30269	-0.1819	-1.79895	-0.483573	-0.633234	-1.48593	-1.20994	-0.907296	-1.97408	-1.15941	-0.894895	-0.120385	-0.913542	-0.144915	-1.37796	-0.815529	-0.968393	-1.29609	-0.78806	-1.40394	-2.47084	-1.44964	-1.34969	-2.16398	-1.20619
0.48	-1.98612	-1.10607	-0.756044	-0.686548	-0.626846	-0.205676	-0.924861	0.185518	-0.272532	-1.81681	-0.515226	-0.781777	-0.972929	-1.33121	-0.908814	-1.63354	-1.18659	0.0659663	-0.120332	-0.974489	-0.11694	-1.40118	-0.692535	-1.08897	-1.27087	-0.798572	-1.27519	-2.09346	-1.61211	-0.986591	-2.2579	0.465392
0.528	-0.744797	-0.505679	-0.757775	-0.692871	-0.589385	-0.381844	-0.917999	0.736683	-0.281905	-1.80515	-0.539393	-0.881795	-0.921689	-1.5861	-0.90827	-1.46466	-1.18852	0.477893	0.0947239	-0.811592	-0.336995	-1.4108	-0.592933	-0.43288	-1.22254	-0.790003	-0.825358	-1.57511	-1.73919	-0.811503	-2.28639	1.52189
0.576	0.320844	-0.174687	-0.744343	-0.695769	-0.564026	-0.535844	-1.03167	0.472841	-0.215474	-1.76912	-0.556433	-1.0029	-1.45421	-1.04086	-0.933158	-1.30251	-1.1698	0.531024	0.103454	-0.692023	-1.6908	-1.40914	-0.492793	-1.00415	-1.15642	-0.764528	-0.113814	-0.527207	-1.79644	-0.722855	-2.25065	1.72631
0.624	-0.438944	-0.253699	-0.718909	-0.693725	-0.556346	-0.663595	-1.19583	0.403738	-0.123448	-1.71413	-0.56687	-0.940663	-1.4081	-1.37086	-0.905048	-1.16848	-1.13451	0.354506	-0.0959762	-0.515237	-1.29278	-1.3972	-0.387263	-1.40288	-1.07803	-0.724435	0.246462	-0.035763	-1.78448	-0.612578	-2.1559	2.14043
0.672	-0.132403	-0.29099	-0.685016	-0.68598	-0.571322	-0.764197	-1.33752	-0.803282	-0.0336109	-1.64584	-0.571326	-0.438376	-2.01541	-0.897471	-0.771643	-1.10216	-1.08819	0.0941023	-0.176317	-0.155926	-1.5696	-1.37638	-0.291627	-0.859621	-0.992148	-0.672216	0.182891	0.161944	-1.73736	-0.432519	-2.01409	2.47528
0.72	0.54462	0.157996	-0.646112	-0.672163	-0.602927	-0.839531	-1.44235	-0.790816	0.0399136	-1.56938	-0.570481	0.181968	-2.94815	-0.994187	-0.62233	-1.05848	-1.03561	-0.0118004	-0.147373	0.160412	-0.556862	-1.34826	-0.21109	-0.305257	-0.902627	-0.610541	0.23333	-0.112741	-1.65273	-0.199468	-1.84267	2.12768
0.768	-0.150452	-0.0145367	-0.604963	-0.652659	-0.634802	-0.892546	-1.52008	1.38225	0.0924378	-1.48888	-0.565021	0.573152	-3.20246	-0.835011	-0.565877	-0.935022	-0.979974	0.0299809	-0.0792292	0.167001	-0.954366	-1.31425	-0.133421	-0.370157	-0.812496	-0.542471	0.379505	-0.434264	-1.49245	0.0521547	-1.65956	1.54661
0.816	-1.70715	-0.790958	-0.563547	-0.62831	-0.654646	-0.926533	-1.5581	-0.499543	0.12618	-1.40745	-0.555602	0.6802	-2.77563	-0.772609	-0.543971	-0.725191	-0.923909	0.0893747	-0.073072	-0.0995513	-0.0366625	-1.27572	-0.0584051	-0.655679	-0.724118	-0.470933	0.624477	-0.307191	-1.24153	0.313904	-1.47691	2.61717
0.864	-1.71606	-0.117773	-0.523284	-0.60004	-0.655643	-0.944948	-1.53641	-1.257	0.143236	-1.32734	-0.542851	0.544899	-1.78431	-0.516766	-0.429154	-0.493864	-0.869402	0.125244	-0.0290453	-0.390523	-1.01372	-1.23398	0.00541932	-0.355903	-0.639306	-0.398009	1.03637	0.294624	-0.926841	0.565746	-1.30303	4.01123
0.912	-0.982076	-0.000993213	-0.48517	-0.569086	-0.636761	-0.950894	-1.44946	1.3994	0.145171	-1.25022	-0.52735	0.278267	-0.765	0.346299	-0.284116	-0.304121	-0.817767	0.193688	-0.00223919	-0.149557	-1.47733	-1.19018	0.050816	0.651739	-0.559304	-0.325313	1.25912	1.12802	-0.597734	0.755258	-1.14506	3.63412
0.96	-0.772986	-0.776932	-0.449817	-0.536928	-0.602113	-0.947066	-1.31099	-2.3988	0.132756	-1.17719	-0.509639	0.00865642	-0.255117	-0.0444146	-0.196495	-0.188694	-0.769929	0.277611	-0.0404239	0.206424	-2.42127	-1.14544	0.0754288	1.16208	-0.484894	-0.254291	1.04947	1.77627	-0.308396	0.842971	-1.00797	3.19632
1.008	-0.790998	-0.644505	-0.417504	-0.504977	-0.556635	-0.935699	-1.14537	-2.21587	0.110459	-1.10889	-0.490207	-0.197026	-0.210138	0.512804	-0.16269	-0.156869	-0.726516	0.281155	-0.0381429	0.473684	-1.79314	-1.1007	0.0807143	0.790326	-0.416524	-0.187123	0.487066	1.89435	-0.0939582	0.825454	-0.893865	5.11506
1.056	-0.485906	-0.468251	-0.388319	-0.474366	-0.505095	-0.91864	-0.97724	0.801345	0.0838575	-1.04558	-0.469491	-0.331669	-0.385765	0.805214	-0.168774	-0.194139	-0.687727	0.167308	-0.000504859	0.728458	0.922095	-1.0567	0.0704456	0.207222	-0.354378	-0.126369	-0.250979	0.932974	0.0254851	0.717895	-0.802816	1.36109
1.104	-0.179019	-0.82287	-0.362192	-0.445817	-0.451466	-0.897389	-0.826232	-0.7614	0.0568436	-0.987287	-0.447881	-0.388878	-0.597708	-0.577697	-0.204783	-0.265252	-0.653388	-0.00760503	0.0166485	0.491179	-0.254535	-1.01392	0.0514339	-0.0736592	-0.298446	-0.0742538	-0.905284	-0.354274	0.0571158	0.549896	-0.733382	0.160317
1.152	0.0186006	-0.30196	-0.338936	-0.419704	-0.398418	-0.873141	-0.703547	-0.0961465	0.0320847	-0.933816	-0.425717	-0.366867	-0.74054	-0.509035	-0.250318	-0.338813	-0.62307	-0.179965	0.0247633	0.109591	0.386043	-0.97263	0.0298585	-0.0650168	-0.248568	-0.0316929	-1.34303	-1.29439	0.0257053	0.358908	-0.682938	-0.997583
1.2	-0.034752	-0.421541	-0.318296	-0.396112	-0.347518	-0.846824	-0.611708	0.977259	0.0112901	-0.884882	-0.403294	-0.296702	-0.789915	-0.311327	-0.289224	-0.395975	-0.59623	-0.314835	0.0285866	0.065226	0.977924	-0.932972	0.00962067	0.0522273	-0.204467	0.00176671	-1.56667	-1.73402	-0.0438379	0.175963	-0.648189	0.34173
1.248	-0.267513	-1.22424	-0.299985	-0.374942	-0.299717	-0.819152	-0.547722	0.333792	-0.00530586	-0.840122	-0.380866	-0.204933	-0.802064	0.0309087	-0.318024	-0.429877	-0.572295	-0.396301	0.0190993	0.0147706	0.485903	-0.894983	-0.0070147	0.187525	-0.16578	0.0271211	-1.61933	-1.81785	-0.128826	0.0190678	-0.625772	-0.261593
1.296	-0.42179	-0.65188	-0.283706	-0.356039	-0.255496	-0.790696	-0.506433	0.806381	-0.0183526	-0.799138	-0.358644	-0.106205	-0.829037	-0.23475	-0.336671	-0.439842	-0.550688	-0.425528	0.0178672	-0.223359	0.359041	-0.858639	-0.0189081	0.201644	-0.132091	0.0459065	-1.54707	-1.67905	-0.214449	-0.102465	-0.612656	0.393274
1.344	-0.425826	-0.476154	-0.269167	-0.339192	-0.215018	-0.761913	-0.482233	0.593358	-0.0285319	-0.761539	-0.336804	-0.0180888	-0.867951	-0.323413	-0.346545	-0.429332	-0.530886	-0.416395	0.0314697	-0.266936	-1.02507	-0.823883	-0.0258669	0.083188	-0.102957	0.0596776	-1.39904	-1.39535	-0.292189	-0.186747	-0.606192	-0.707095
1.392	-0.413335	-0.289179	-0.256105	-0.324154	-0.178324	-0.733159	-0.4702	-0.219991	-0.0364228	-0.726956	-0.31549	0.0507086	-0.888468	0.0574279	-0.349588	-0.404276	-0.512463	-0.382554	0.0486879	-0.157224	0.206628	-0.790647	-0.0283114	-0.0615304	-0.0779318	0.0693582	-1.21685	-1.09914	-0.356416	-0.237308	-0.604109	0.168966
1.44	-0.412522	-0.370658	-0.244286	-0.310687	-0.145369	-0.704701	-0.466428	-0.0360306	-0.0424479	-0.695048	-0.294818	0.101378	-0.883813	-0.458978	-0.34685	-0.370265	-0.495081	-0.334219	0.0682641	-0.0789683	-0.670136	-0.758857	-0.0270304	-0.161025	-0.056583	0.0752503	-1.02762	-0.909657	-0.40209	-0.260227	-0.604525	0.245242
1.488	-0.342568	-0.789652	-0.233509	-0.298591	-0.116003	-0.676743	-0.467731	0.366666	-0.0468654	-0.665501	-0.274876	0.136334	-0.858816	-1.18036	-0.33898	-0.331751	-0.478477	-0.279041	0.0904046	-0.162377	-0.111379	-0.728437	-0.0229186	-0.19535	-0.0384978	0.0776974	-0.850746	-0.86309	-0.426214	-0.261661	-0.605898	0.544048

## Sheet: CA1 Impulse
0	522703	523101	522403	524401	524304	522502	524303	523002	522202	521701	522402	522203	524301	524302	522001	522701	522503	522002	522401	522902	521801	523201	522101	522301	522702	522802	522501	659203	522201	522801	524305	523001
-0.48	0.141709	0.0927588	0.147653	0.279536	0.339103	0.0718891	0.166241	0.408768	0.110592	0.42571	0.255895	-0.00215464	0.00186831	0.191812	0.203616	0.110643	0.268423	0.106928	0.401569	0.173106	-0.0833688	0.189379	0.292789	-0.0409335	0.165899	0.357834	0.302053	0.317562	0.227517	0.349629	-0.0904358	0.581909
-0.432	0.141418	0.103588	0.132069	0.294623	0.385712	0.0796723	0.2041	0.443457	0.137818	0.530772	0.298952	0.00324039	0.0142555	0.246067	0.312319	0.0808272	0.319369	0.133722	0.45045	0.203163	-0.091067	0.23986	0.380801	-0.0317007	0.173876	0.418643	0.269088	0.371375	0.251167	0.260902	-0.104792	0.663684
-0.384	0.142267	0.126835	0.0955577	0.335187	0.429428	0.0889549	0.239266	0.483432	0.171363	0.628062	0.339042	0.0129856	0.0270269	0.308363	0.444384	0.0453779	0.373175	0.162606	0.50137	0.242544	-0.0972331	0.296332	0.492849	-0.0182534	0.172165	0.48024	0.253246	0.436676	0.198305	0.156783	-0.131619	0.591795
-0.336	0.156609	0.164649	0.0373875	0.404605	0.471107	0.0997371	0.269128	0.53795	0.211944	0.716166	0.370076	0.0395416	0.0394895	0.380306	0.57512	0.00325267	0.42585	0.207541	0.553885	0.295046	-0.104316	0.355973	0.632593	-0.00291965	0.159153	0.541447	0.266029	0.522632	0.1222	0.128239	-0.141822	0.407301
-0.288	0.193999	0.21768	-0.0485407	0.511375	0.512842	0.111951	0.291128	0.634618	0.260539	0.793842	0.384105	0.0983631	0.0509793	0.460883	0.679675	-0.0266442	0.48263	0.228614	0.603863	0.364558	-0.117559	0.42087	0.798422	0.00860897	0.133742	0.598724	0.320954	0.629246	0.137429	0.153225	-0.1045	0.32648
-0.24	0.259139	0.286278	-0.13741	0.660291	0.566953	0.125356	0.302471	0.799299	0.317809	0.854789	0.369609	0.192878	0.0607913	0.548283	0.772177	-0.0474731	0.549386	0.131303	0.630608	0.453796	-0.145463	0.498295	0.981049	0.00727681	0.0951994	0.646805	0.405067	0.73852	0.332735	0.242683	-0.0061784	0.426473
-0.192	0.357008	0.371765	-0.147748	0.84931	0.739221	0.139443	0.300625	1.03631	0.383232	0.890908	0.306743	0.292305	0.0679247	0.638203	0.922351	-0.0907112	0.629034	0.153494	0.586337	0.560388	-0.197632	0.594284	1.16834	-0.0187933	0.0435866	0.680233	0.50537	0.787371	0.697752	0.357375	0.125005	0.527984
-0.144	0.489145	0.474398	0.0396651	1.06529	1.19237	0.153422	0.284352	1.33519	0.454154	0.894205	0.171736	0.309022	0.0709225	0.721768	1.22421	-0.0912529	0.689969	0.061616	0.388422	0.677353	-0.282247	0.711129	1.34325	-0.0811779	-0.0188295	0.694388	0.952867	0.660937	1.08818	0.593628	0.184806	0.82091
-0.096	0.649037	0.586655	0.583197	1.28071	1.72319	0.166268	0.255294	1.66934	0.525237	0.859696	-0.0438757	0.0964557	0.0693634	0.787943	1.77964	0.357095	0.58694	-0.0776179	-0.1135	0.793423	-0.400925	0.847764	1.48134	-0.18597	-0.0866623	0.686294	1.52826	0.227004	0.996017	1.37572	-0.0709939	1.44467
-0.048	0.814671	0.691324	1.63986	1.46379	0.607068	0.176662	0.219667	1.96528	0.587964	0.794958	-0.308076	-0.438369	0.064212	0.827733	2.59794	1.91526	0.0373487	1.64671	-1.08359	0.893073	-0.537966	0.993177	1.56297	-0.322887	-0.150006	0.659057	0.200547	-0.554763	-0.831096	1.97579	-0.955725	0.329973
0	0.940907	0.762633	2.95609	1.57737	-6.23124	0.182865	0.190573	2.1372	0.629305	0.730781	-0.528658	-1.13987	0.0586448	0.84059	3.42286	4.53232	-1.06228	9.39436	-2.36057	0.955123	-0.648426	1.11212	1.58949	-0.446103	-0.193194	0.629185	-7.10698	-1.41352	-5.22937	-9.87807	-2.36327	-8.57138
0.048	1.70069	0.365144	0.0296672	0.98627	0.143683	0.919704	0.795165	1.55459	0.341077	0.86127	0.386765	-0.00335388	0.724979	1.26565	1.03697	1.56995	1.06698	0.56926	-0.953172	2.06086	-3.16244	0.89801	1.22283	-0.00838062	0.569934	2.33131	-0.0975216	-0.933146	-0.145047	-1.16282	-0.560359	-0.300965
0.096	3.28004	2.50424	0.0771445	1.81532	0.335939	2.3439	1.85367	1.92953	0.875363	1.71613	0.882302	-0.00894051	1.98359	2.29422	1.94654	3.93544	1.6367	2.75718	-0.651176	3.27784	-2.08245	1.78944	1.59228	-0.0223192	1.26824	3.25635	-0.255629	3.19288	-0.318653	-2.34043	-1.17354	-0.744565
0.144	2.98616	2.34683	0.128191	1.6768	0.464677	0.896758	2.39935	0.943149	1.26692	1.94534	1.11374	-0.0153215	2.20527	3.06862	1.78525	2.68273	1.00217	1.97475	-0.560234	1.96682	-0.400619	1.86805	0.869877	-0.0377127	1.60454	2.34026	-0.422709	2.63653	-0.41757	-2.599	-1.55345	-2.61419
0.192	2.50661	1.2283	0.18073	1.11292	0.514488	0.591907	2.32574	0.464707	1.47806	1.79362	1.13619	-0.0223801	1.45083	1.59831	1.29125	1.53025	0.442711	1.52715	1.35507	0.704394	-0.503451	1.59041	0.403682	-0.0541155	1.62785	1.23245	-0.582658	-0.627604	-0.453279	-2.35976	-1.75775	-2.0367
0.24	2.2362	2.09202	0.232761	0.603852	0.498454	1.48657	1.76354	0.545907	1.49726	1.4878	1.05465	-0.0299954	0.452414	2.06235	0.798193	0.88048	0.561934	0.802004	0.738969	0.510098	-1.53444	1.44438	0.35933	-0.0711435	1.48245	0.219632	-0.725841	0.335468	-0.460594	-2.13544	-1.80583	-1.90326
0.288	1.85118	2.02056	0.280433	0.370825	0.422337	1.33921	1.15115	0.279556	1.34628	1.0461	0.904441	-0.0378555	-0.564703	1.60507	0.523876	0.896934	0.881586	1.19469	0.218957	0.849221	-1.77328	1.29426	0.386089	-0.0878117	1.19736	-0.338704	-0.841968	0.456234	-0.454913	-1.96462	-1.66487	-1.57738
0.336	1.28444	0.235865	0.321211	0.318502	0.29863	1.38577	0.65636	0.0195179	1.11824	0.536733	0.713311	-0.0457876	-0.877931	-0.59538	0.511557	1.62493	0.905476	1.26267	0.567579	1.21929	-1.7838	1.05302	0.439248	-0.103603	0.821574	-0.24853	-0.926513	0.637613	-0.451742	-1.80947	-1.36715	-0.855432
0.384	0.760933	0.816045	0.353866	0.34253	0.135452	1.57746	0.290747	0.0236833	0.89085	0.0835226	0.497365	-0.053712	0.278714	0.124511	0.490848	1.78518	0.603748	0.58492	-0.59074	1.1531	-1.73731	0.872407	0.408115	-0.118336	0.433927	0.00998368	-0.981062	-0.331814	-0.461617	-1.69235	-1.00513	-1.69185
0.432	0.209317	0.468476	0.377556	0.369998	-0.0630804	0.982803	0.114527	0.0727284	0.688885	-0.267238	0.255159	-0.0615485	0.0542272	0.191528	0.373458	0.904249	0.261705	0.774835	-1.44669	0.723053	-0.916094	0.731004	0.199224	-0.131824	0.0902788	0.160803	-1.00969	-0.40283	-0.484065	-1.63712	-0.652989	-2.00569
0.48	-0.148339	-0.775549	0.391978	0.297121	-0.285225	-0.293483	0.059991	-0.109777	0.518074	-0.513092	0.00539244	-0.0692322	-0.309902	-0.321004	0.196674	0.228213	-0.054054	0.35263	-1.03286	0.202199	0.468055	0.554144	0.00562113	-0.14392	-0.182178	0.123109	-1.01751	-1.18144	-0.515522	-1.63511	-0.351602	-2.19028
0.528	-0.177302	0.295716	0.397571	0.104726	-0.506951	-0.261527	-0.00211142	-0.437461	0.378153	-0.659972	-0.226193	-0.0767229	0.0716995	-0.951312	0.0117801	0.162892	-0.341141	-0.102288	2.49348	-0.125291	1.15702	0.319418	-0.129338	-0.154564	-0.377723	-0.0372638	-1.00987	0.996876	-0.551345	-1.65044	-0.121977	-1.9289
0.576	-0.108872	0.633007	0.395189	-0.171925	-0.707172	-0.419953	-0.10829	-0.549962	0.261039	-0.735045	-0.429774	-0.083991	-0.157172	0.265935	-0.142102	0.265883	-0.595699	0.116557	-0.0981394	-0.145394	1.17392	0.054432	-0.277813	-0.163738	-0.504646	-0.185491	-0.991181	-3.10219	-0.586065	-1.65778	0.0335473	-2.40013
0.624	-0.194841	-0.815806	0.385816	-0.480595	-0.869905	-0.534116	-0.253396	-0.493988	0.157248	-0.770475	-0.598612	-0.0910117	-1.5033	0.776392	-0.258424	0.293656	-0.784883	0.368736	-1.72778	-0.104367	0.916575	-0.171653	-0.445048	-0.171446	-0.584115	-0.345397	-0.964878	-1.15594	-0.614597	-1.64861	0.127328	-1.20042
0.672	-0.468532	-1.64541	0.370572	-0.759505	-0.98782	-0.456871	-0.431	-0.394065	0.0631699	-0.78539	-0.727925	-0.0977667	-0.786695	-1.44777	-0.347635	0.272204	-0.897843	0.393753	-0.106639	-0.167951	0.677332	-0.362168	-0.592023	-0.177712	-0.637725	-0.573837	-0.933707	-0.492906	-0.633932	-1.62613	0.17507	0.58869
0.72	-0.784856	-1.46716	0.350643	-0.975459	-1.06196	-0.40163	-0.622973	-0.347087	-0.0212381	-0.787946	-0.81987	-0.104243	0.602731	-0.959787	-0.405122	0.0999804	-0.957828	0.272121	-1.11985	-0.419447	0.585108	-0.550035	-0.700112	-0.182587	-0.677786	-0.81756	-0.899828	-2.91082	-0.643585	-1.58946	0.186089	-0.00942282
0.768	-1.0262	-2.43425	0.327165	-1.1148	-1.09449	-0.49565	-0.8055	-0.422805	-0.095655	-0.782116	-0.878394	-0.110431	0.909369	-0.67738	-0.425606	-0.198093	-0.988155	-0.0935474	0.0439472	-0.820813	0.621327	-0.759231	-0.769852	-0.186141	-0.707517	-1.00478	-0.864878	-1.49381	-0.644251	-1.53783	0.165719	-0.891569
0.816	-1.15597	-1.67319	0.301267	-1.18055	-1.08891	-0.834291	-0.964734	-0.547372	-0.159588	-0.767749	-0.907167	-0.116326	-0.494577	-1.70198	-0.410311	-0.445914	-1.02196	-0.574468	-0.729271	-1.18883	0.757761	-0.932454	-0.802979	-0.18846	-0.727524	-1.11278	-0.83004	-0.390304	-0.637137	-1.47141	0.119806	-0.408164
0.864	-1.14171	-2.01722	0.274164	-1.18373	-1.05019	-1.01786	-1.08555	-0.708065	-0.212871	-0.744056	-0.911462	-0.121924	-1.11786	-1.99492	-0.367749	-0.548969	-1.0572	-0.793513	-0.202904	-1.4186	0.932717	-0.990699	-0.788715	-0.189638	-0.737926	-1.14457	-0.796113	-2.23938	-0.62395	-1.39112	0.0548287	-0.211878
0.912	-0.984368	-2.47734	0.24707	-1.13684	-0.986077	-1.06676	-1.14476	-0.865201	-0.256283	-0.712675	-0.897348	-0.127225	-1.23006	-2.25232	-0.307782	-0.509556	-1.04984	-0.676513	-0.142253	-1.46533	1.03329	-0.91102	-0.723929	-0.18977	-0.738497	-1.09724	-0.763586	-2.46951	-0.606674	-1.30024	-0.0236751	-1.59394
0.96	-0.733071	-1.84786	0.22098	-1.05669	-0.905244	-0.88083	-1.12997	-0.885779	-0.290976	-0.676564	-0.870893	-0.132235	-0.518339	-1.6994	-0.235645	-0.365889	-0.976409	-0.355305	-0.549877	-1.32924	0.930778	-0.727909	-0.625759	-0.188956	-0.730258	-0.982875	-0.732719	-0.826941	-0.586997	-1.2025	-0.110663	-2.56721
1.008	-0.4535	0.00214277	0.196538	-0.963338	-0.816906	-0.501352	-1.04797	-0.731154	-0.318038	-0.638741	-0.837275	-0.13696	0.106883	-0.878658	-0.161313	-0.201177	-0.85224	-0.0144003	0.738569	-1.06906	0.607286	-0.500734	-0.519417	-0.187298	-0.71487	-0.837787	-0.703602	-0.32668	-0.566241	-1.10029	-0.201517	-1.03949
1.056	-0.206846	-0.179089	0.174014	-0.873286	-0.7295	-0.265661	-0.922517	-0.502124	-0.338715	-0.601797	-0.800484	-0.141409	0.192228	-0.0230181	-0.0981381	-0.0933044	-0.706505	0.196575	0.359703	-0.766932	0.193103	-0.286859	-0.425945	-0.184891	-0.69425	-0.701981	-0.676214	0.0329874	-0.545392	-0.995822	-0.291937	0.13824
1.104	-0.0168396	-0.0591927	0.1535	-0.796599	-0.648966	-0.243912	-0.777726	-0.303505	-0.354113	-0.567684	-0.763394	-0.145591	0.195853	-1.00031	-0.0516142	-0.0345875	-0.558407	0.290359	-0.861167	-0.484339	-0.148696	-0.11759	-0.357807	-0.18183	-0.670414	-0.594039	-0.650465	-0.231078	-0.525045	-0.892368	-0.377411	0.958539
1.152	0.113067	0.731145	0.134965	-0.737421	-0.579432	-0.209158	-0.63387	-0.153829	-0.365114	-0.537616	-0.727697	-0.149511	-0.202504	0.28756	-0.0211609	0.00208723	-0.41907	0.333313	-0.635039	-0.257384	-0.351396	-0.0113159	-0.315996	-0.178203	-0.644972	-0.516899	-0.626231	0.352359	-0.505499	-0.793021	-0.454117	-0.372558
1.2	0.186554	-0.335883	0.118279	-0.695477	-0.523081	-0.0998331	-0.505401	-0.0572273	-0.37248	-0.511814	-0.694267	-0.153175	0.367333	0.889758	-0.00537133	0.017721	-0.30068	0.337574	-0.28096	-0.101774	-0.4271	0.0237786	-0.295008	-0.174093	-0.619153	-0.467338	-0.603386	-0.453369	-0.486881	-0.699784	-0.520039	-2.16263
1.248	0.212094	-0.198529	0.103307	-0.667697	-0.480162	0.00381177	-0.399212	-0.0122533	-0.376737	-0.48982	-0.663502	-0.156592	0.285134	0.410758	-0.00130204	0.0100245	-0.211986	0.304369	-0.284606	-0.0119914	-0.413374	-0.00288456	-0.288271	-0.169579	-0.593844	-0.438174	-0.581808	-0.404666	-0.469216	-0.613754	-0.574682	-0.570753
1.296	0.200535	-0.841679	0.0899645	-0.650257	-0.449491	0.0798192	-0.318409	-0.00654048	-0.378308	-0.471009	-0.635472	-0.159771	0.194658	-0.743979	-0.00521931	-0.0159739	-0.154067	0.246264	-0.721392	0.0233872	-0.344766	-0.0738343	-0.290256	-0.164733	-0.5696	-0.422687	-0.56138	1.35116	-0.452477	-0.535418	-0.618349	0.180035
1.344	0.163314	-0.476913	0.0781984	-0.639472	-0.428988	0.114571	-0.263287	-0.0267577	-0.377557	-0.454749	-0.609995	-0.162723	-0.900949	-0.353252	-0.0137319	-0.0506183	-0.122617	0.176228	-1.09592	0.018271	-0.249858	-0.170718	-0.296294	-0.159622	-0.546729	-0.415474	-0.541996	-0.0852224	-0.436604	-0.464964	-0.65181	-1.20123
1.392	0.111264	0.636163	0.0679159	-0.632379	-0.416269	0.0859215	-0.231593	-0.0608755	-0.374814	-0.440417	-0.586775	-0.165458	-0.334581	0.674637	-0.0239765	-0.0844915	-0.111348	0.105543	-1.18207	-0.0136848	-0.153175	-0.275842	-0.302719	-0.154312	-0.525365	-0.411755	-0.523555	0.0597599	-0.421536	-0.402298	-0.676092	-0.823858
1.44	0.0546122	-0.0643705	0.0590335	-0.626849	-0.409127	-0.000594084	-0.219806	-0.10176	-0.370374	-0.427458	-0.565518	-0.16799	0.398367	0.630763	-0.0340435	-0.111811	-0.114279	0.040898	-0.0226016	-0.0617291	-0.069544	-0.374451	-0.307416	-0.148859	-0.505517	-0.408648	-0.50597	-0.628545	-0.407211	-0.347057	-0.692336	0.840406
1.488	-0.000196412	-1.22693	0.0514089	-0.621416	-0.40573	-0.112659	-0.22365	-0.143747	-0.364493	-0.415421	-0.545955	-0.170331	-0.277746	-0.0674511	-0.0428591	-0.130624	-0.126072	-0.0150827	0.490793	-0.117411	-0.00488387	-0.457156	-0.309621	-0.143317	-0.487108	-0.404922	-0.489161	-1.75676	-0.393564	-0.298792	-0.701736	-0.0740101
