# Supplementary material for: UP-DOWN states and ripples differentially modulate membrane potential dynamics across DG, CA3, and CA1 in awake mice
Source: eLife. 2022 Jul 12;11:e69596. doi: 10.7554/eLife.69596 (PMC9275824; doi:10.7554/eLife.69596)
Supplement: Figure 5—figure supplement 3—source data 1. [file elife-69596-fig5-figsupp3-data1.xls]

## Sheet: DG State Vm std
0	523502	524002	523501	523701	523801	524203	523301	524102	524001	523302	524003	524202	523601	523401	524201	659201	523402	524101	659202	523901	523702	523602
0.05	4.23666	5.69014	3.33514	3.76289	5.08011	2.98257	4.04075	3.74723	4.233	4.46415	5.47421	2.72122	3.51611	2.57872	2.82916	3.2963	3.66385	2.95307	3.28973	3.34011	4.41428	6.2696
0.15	4.46183	3.77531	3.25671	3.8902	5.64833	2.69175	4.04656	3.52769	3.9198	4.39768	5.52405	2.93742	3.42625	2.5609	3.45983	3.57514	3.17531	3.06055	3.96984	3.28482	4.06218	6.70303
0.25	4.27353	3.85968	3.2107	3.72289	4.47021	2.62229	3.92307	3.25417	4.32964	3.82338	5.64691	2.81342	3.55303	2.92628	2.90636	3.63158	3.28169	3.05361	3.32827	2.18466	4.00795	6.45015
0.35	3.8614	3.10746	3.42207	3.62472	5.17179	2.56928	4.17853	3.87994	4.06252	4.68705	5.31652	2.91403	3.65813	2.81409	2.7351	3.52626	2.64005	3.0563	3.46521	4.36287	4.1388	6.52984
0.45	4.29634	3.78516	3.22984	3.75804	5.08106	2.68182	3.96884	3.56366	4.12548	4.18157	5.24181	2.85726	3.56977	2.78039	2.88833	3.41242	2.67582	2.82616	3.40071	3.69168	4.43226	6.99874
0.55	4.04247	3.68634	3.42954	3.50818	4.65382	2.81667	4.25642	3.86769	3.84911	4.59466	5.25842	2.93975	3.48987	2.83022	2.63993	3.29251	2.86058	2.96278	3.78491	3.89953	4.46815	6.68707
0.65	4.15254	3.55135	3.44482	3.66429	4.70736	2.32285	4.6672	4.22256	4.28719	4.45922	5.66959	2.95614	3.44495	2.98241	2.93862	3.64786	3.00504	2.89225	3.73009	4.45418	4.72158	6.53533
0.75	3.90212	3.10619	3.34454	3.92729	4.08809	2.54221	5.20412	4.42436	4.13998	5.08434	5.90897	2.83429	3.49219	2.6066	3.25287	3.32939	2.78704	3.09049	3.48352	4.13482	4.54202	6.46827
0.85	4.39656	3.38478	2.88738	4.7556	4.79629	2.84247	4.30144	3.51042	4.08626	4.70654	5.21942	3.11235	3.65792	2.88527	2.72478	3.18557	2.75996	3.27942	3.8404	3.36001	4.30176	5.79797
0.95	4.33163	4.58618	3.37531	4.3607	4.91795	3.15624	4.26353	4.25619	4.29683	4.61545	4.64534	3.10784	3.80532	3.124	3.20223	3.66452	2.67726	3.30874	3.58182	3.17048	4.27686	6.16433
1.05	4.79488	4.57352	3.64057	4.35074	5.03363	3.37119	5.02021	4.51125	3.83453	4.50582	3.99913	3.28871	4.27579	3.0198	4.29371	3.58492	2.81285	3.18213	3.87579	3.94661	4.15399	4.2932
1.15	4.42138	5.35741	3.32515	4.77306	4.48298	3.18824	4.6	4.58387	3.86237	5.06431	3.87211	3.17255	3.84273	3.35936	3.36981	3.31198	2.86655	3.27132	3.80158	2.97269	4.4668	4.83116
1.25	4.84362	4.46595	3.66585	4.84703	4.664	3.24266	4.38319	4.42159	3.8389	3.78357	3.6666	3.62026	3.72475	3.28326	3.68901	4.09793	2.75485	3.46472	3.75252	3.42173	3.70061	4.6615
1.35	4.74647	5.14403	3.63289	4.61484	4.51035	3.1986	4.25699	4.94234	3.81138	5.44791	4.38978	3.3177	3.9923	3.31439	3.73985	3.5159	3.14714	3.3072	3.89311	3.52833	4.28682	4.85426
1.45	4.79144	4.40837	3.97318	4.63799	4.6772	3.08412	4.36004	4.73343	3.74652	4.25799	3.71581	2.99534	3.86362	2.92754	3.26698	3.64315	2.97136	3.33973	3.77078	5.05947	4.36792	5.02992
1.55	4.85945	3.87562	3.93121	4.38118	4.22631	3.46619	4.37865	4.22271	3.64489	4.65087	4.21673	3.22659	3.5946	2.66292	3.79323	4.0562	2.92915	3.22839	3.82055	3.68856	4.51111	4.7488
1.65	4.5671	4.27643	3.91387	4.80134	4.68813	3.34449	4.23073	4.76851	3.91616	4.14199	3.6876	3.51693	3.96956	2.94896	3.33863	3.72954	2.66217	3.09057	3.68447	3.21972	4.13624	5.11255
1.75	4.82598	5.0915	3.65868	4.45802	4.53086	3.37256	4.35829	4.39008	4.49453	5.48733	3.81021	3.33975	4.0834	2.55724	4.3462	3.77114	2.44304	3.04449	3.87416	3.54103	3.93442	4.69915
1.85	4.87351	4.13906	3.3225	4.28316	4.78664	3.17652	3.86032	4.26488	4.30532	3.83008	4.16611	2.80707	3.93602	2.9367	4.20382	4.27468	2.68638	3.00128	3.64674	3.4424	3.96551	4.93057
1.95	4.55696	4.91902	3.98956	4.17994	4.15031	3.21272	3.96976	3.60434	4.50398	4.59016	4.06676	2.92028	3.6959	3.30696	3.35518	3.6648	2.6606	3.29044	3.63759	4.18065	3.94498	4.69205
2.05	4.23666	5.69014	3.33514	3.76289	5.08011	2.98257	4.04075	3.74723	4.233	4.46415	5.47421	2.72122	3.51611	2.57872	2.82916	3.2963	3.66385	2.95307	3.28973	3.34011	4.41428	6.2696
2.15	4.46183	3.77531	3.25671	3.8902	5.64833	2.69175	4.04656	3.52769	3.9198	4.39768	5.52405	2.93742	3.42625	2.5609	3.45983	3.57514	3.17531	3.06055	3.96984	3.28482	4.06218	6.70303
2.25	4.27353	3.85968	3.2107	3.72289	4.47021	2.62229	3.92307	3.25417	4.32964	3.82338	5.64691	2.81342	3.55303	2.92628	2.90636	3.63158	3.28169	3.05361	3.32827	2.18466	4.00795	6.45015
2.35	3.8614	3.10746	3.42207	3.62472	5.17179	2.56928	4.17853	3.87994	4.06252	4.68705	5.31652	2.91403	3.65813	2.81409	2.7351	3.52626	2.64005	3.0563	3.46521	4.36287	4.1388	6.52984
2.45	4.29634	3.78516	3.22984	3.75804	5.08106	2.68182	3.96884	3.56366	4.12548	4.18157	5.24181	2.85726	3.56977	2.78039	2.88833	3.41242	2.67582	2.82616	3.40071	3.69168	4.43226	6.99874
2.55	4.04247	3.68634	3.42954	3.50818	4.65382	2.81667	4.25642	3.86769	3.84911	4.59466	5.25842	2.93975	3.48987	2.83022	2.63993	3.29251	2.86058	2.96278	3.78491	3.89953	4.46815	6.68707
2.65	4.15254	3.55135	3.44482	3.66429	4.70736	2.32285	4.6672	4.22256	4.28719	4.45922	5.66959	2.95614	3.44495	2.98241	2.93862	3.64786	3.00504	2.89225	3.73009	4.45418	4.72158	6.53533
2.75	3.90212	3.10619	3.34454	3.92729	4.08809	2.54221	5.20412	4.42436	4.13998	5.08434	5.90897	2.83429	3.49219	2.6066	3.25287	3.32939	2.78704	3.09049	3.48352	4.13482	4.54202	6.46827
2.85	4.39656	3.38478	2.88738	4.7556	4.79629	2.84247	4.30144	3.51042	4.08626	4.70654	5.21942	3.11235	3.65792	2.88527	2.72478	3.18557	2.75996	3.27942	3.8404	3.36001	4.30176	5.79797
2.95	4.33163	4.58618	3.37531	4.3607	4.91795	3.15624	4.26353	4.25619	4.29683	4.61545	4.64534	3.10784	3.80532	3.124	3.20223	3.66452	2.67726	3.30874	3.58182	3.17048	4.27686	6.16433
3.05	4.79488	4.57352	3.64057	4.35074	5.03363	3.37119	5.02021	4.51125	3.83453	4.50582	3.99913	3.28871	4.27579	3.0198	4.29371	3.58492	2.81285	3.18213	3.87579	3.94661	4.15399	4.2932
3.15	4.42138	5.35741	3.32515	4.77306	4.48298	3.18824	4.6	4.58387	3.86237	5.06431	3.87211	3.17255	3.84273	3.35936	3.36981	3.31198	2.86655	3.27132	3.80158	2.97269	4.4668	4.83116
3.25	4.84362	4.46595	3.66585	4.84703	4.664	3.24266	4.38319	4.42159	3.8389	3.78357	3.6666	3.62026	3.72475	3.28326	3.68901	4.09793	2.75485	3.46472	3.75252	3.42173	3.70061	4.6615
3.35	4.74647	5.14403	3.63289	4.61484	4.51035	3.1986	4.25699	4.94234	3.81138	5.44791	4.38978	3.3177	3.9923	3.31439	3.73985	3.5159	3.14714	3.3072	3.89311	3.52833	4.28682	4.85426
3.45	4.79144	4.40837	3.97318	4.63799	4.6772	3.08412	4.36004	4.73343	3.74652	4.25799	3.71581	2.99534	3.86362	2.92754	3.26698	3.64315	2.97136	3.33973	3.77078	5.05947	4.36792	5.02992
3.55	4.85945	3.87562	3.93121	4.38118	4.22631	3.46619	4.37865	4.22271	3.64489	4.65087	4.21673	3.22659	3.5946	2.66292	3.79323	4.0562	2.92915	3.22839	3.82055	3.68856	4.51111	4.7488
3.65	4.5671	4.27643	3.91387	4.80134	4.68813	3.34449	4.23073	4.76851	3.91616	4.14199	3.6876	3.51693	3.96956	2.94896	3.33863	3.72954	2.66217	3.09057	3.68447	3.21972	4.13624	5.11255
3.75	4.82598	5.0915	3.65868	4.45802	4.53086	3.37256	4.35829	4.39008	4.49453	5.48733	3.81021	3.33975	4.0834	2.55724	4.3462	3.77114	2.44304	3.04449	3.87416	3.54103	3.93442	4.69915
3.85	4.87351	4.13906	3.3225	4.28316	4.78664	3.17652	3.86032	4.26488	4.30532	3.83008	4.16611	2.80707	3.93602	2.9367	4.20382	4.27468	2.68638	3.00128	3.64674	3.4424	3.96551	4.93057
3.95	4.55696	4.91902	3.98956	4.17994	4.15031	3.21272	3.96976	3.60434	4.50398	4.59016	4.06676	2.92028	3.6959	3.30696	3.35518	3.6648	2.6606	3.29044	3.63759	4.18065	3.94498	4.69205

## Sheet: CA3 State Vm std
0	525301	521502	525101	520901	525001	659105	719301	525403	521303	521602	580501	525404	580201	521304	580601	719002	520701	526202	719303	521401	719001	719103	521101	659101	521501	521102	719201	521302	525003	521202	520702	719202
0.05	2.4146	3.15077	2.77092	1.76944	1.91536	2.66261	3.41611	2.81607	3.37107	2.89727	2.95288	3.24394	4.53287	3.837	2.09441	4.02841	3.68679	2.3308	2.1983	3.55055	2.35449	2.14901	2.74596	1.8121	2.1563	4.29172	2.66472	3.35987	2.84648	4.86137	3.72443	6.74096
0.15	2.60556	3.00553	2.53731	2.27774	2.20763	2.28185	2.38116	2.96564	3.65792	3.02991	3.0004	2.41919	4.41343	3.73468	2.31101	2.97979	3.49503	2.13363	2.20048	3.4298	1.75473	3.03696	2.88626	2.06835	2.07353	3.99734	2.98573	3.05527	2.27085	3.88509	4.49253	6.44877
0.25	2.21553	2.61462	2.56695	3.19357	2.04691	2.32235	2.5991	3.08469	3.71419	2.53868	3.17201	3.13003	4.80384	4.08014	2.12519	3.22042	3.43597	2.23982	1.4947	3.8919	1.84017	3.10999	3.3396	1.92376	2.69776	4.10454	2.76341	3.11188	2.25855	5.97181	4.63558	6.76609
0.35	2.65459	3.55159	2.86125	2.28756	1.94042	2.59168	3.36887	3.41059	3.64607	2.32428	3.17577	3.30778	4.45458	4.26175	2.12688	3.43751	3.52329	2.1178	2.07943	3.82955	1.95575	3.20519	3.50416	1.77084	2.53631	4.02938	2.7599	2.95739	2.39385	5.904	4.2625	7.03113
0.45	2.71287	2.96889	2.41066	2.14598	2.39856	2.33057	2.24862	2.97242	3.62314	2.83071	2.80623	2.75262	4.36656	3.74529	2.19792	2.9656	3.80704	2.29843	2.69372	3.88123	1.75414	3.09916	3.77145	1.73303	2.49124	4.05965	2.91441	2.63732	2.39696	4.56971	4.46572	7.0562
0.55	2.33345	2.83359	2.53086	2.07327	2.10669	2.27342	2.26515	3.08963	3.73288	2.26272	3.25593	3.01483	4.75281	3.66117	1.99335	2.93244	3.27323	2.20863	2.09853	3.76623	1.93948	3.29196	2.85309	2.03104	2.23706	4.65462	3.31413	3.00208	2.77912	4.57076	4.318	6.79309
0.65	2.51005	2.91324	2.61465	2.82176	2.26604	2.2371	1.70249	3.21727	3.64232	2.18557	2.62548	2.91826	4.54438	3.69839	2.21495	3.38401	3.57131	2.01039	2.12278	3.78727	2.249	3.09739	3.72183	1.90877	2.12298	4.17431	3.03104	2.62092	2.2792	6.25783	3.9484	7.15625
0.75	2.59726	3.08836	2.48074	2.03164	2.30126	2.46236	2.02115	2.779	3.63261	1.96059	2.89175	3.49459	3.98634	3.68694	1.82915	3.48914	3.50126	2.00677	3.12145	3.42221	1.7285	3.04612	3.50741	2.27941	1.91475	3.92277	3.2802	2.71605	2.2356	4.76975	5.00347	6.73718
0.85	2.48408	2.78125	2.92561	2.57454	2.52001	2.13532	1.82867	2.63046	3.70649	1.93077	2.89356	2.97103	4.20108	3.64376	1.95375	3.7247	3.40112	2.4135	3.31125	2.99849	2.0566	2.8353	2.46554	2.22864	2.02703	3.47008	2.92382	2.76023	2.27631	4.40896	3.949	6.44859
0.95	2.78311	2.71678	2.50684	3.07722	2.6964	2.22238	3.17074	2.99927	3.45577	2.08902	2.554	3.20277	3.9615	2.95342	2.09922	3.39819	3.35531	2.26962	2.40296	3.08416	1.897	2.85524	2.76127	2.04802	1.82882	3.34157	2.98449	2.89228	3.03761	3.94975	3.83176	5.35504
1.05	2.58696	2.9199	2.60919	2.29858	2.63407	2.57133	2.05755	3.10757	3.60237	2.53847	2.70163	3.00573	4.18162	3.0465	1.94586	3.13382	3.22133	2.24568	2.70886	3.30003	2.00488	3.15069	3.03807	2.28934	2.06395	3.01118	2.53149	2.44664	2.73038	3.04988	3.62278	4.89059
1.15	2.85789	2.66748	2.67401	2.66193	2.58913	2.68568	2.92864	3.13428	3.70086	2.99756	3.11304	2.78649	4.39773	3.24859	2.37174	2.96668	3.32472	2.81552	2.71763	2.97031	2.17555	3.27938	2.43573	2.55692	2.27152	3.43071	3.19355	2.79598	3.08467	2.7887	3.82183	4.55397
1.25	2.77781	2.61511	2.91306	2.66994	3.08854	2.60886	2.2121	3.45068	3.75411	2.534	2.88412	2.49049	4.30572	3.20357	2.38099	2.61932	3.29803	2.60665	2.63649	3.60052	2.10287	3.25166	3.1181	2.55551	2.45836	3.2521	2.85551	2.60185	3.20373	3.11172	4.06487	4.84446
1.35	2.73672	2.63345	2.53349	2.63658	2.99623	2.43766	2.02706	3.12029	3.8759	2.37407	3.0126	2.85028	4.01682	3.32722	2.39857	2.78203	3.28843	2.49379	2.48699	3.44613	1.72634	2.61048	2.88678	2.29181	2.33021	3.57313	2.89871	2.76951	3.12822	3.05886	4.30451	5.05008
1.45	2.77919	2.59802	2.96369	2.85185	2.87402	2.82197	1.97724	3.0564	3.7497	2.29678	3.27976	3.00166	4.51507	3.48389	2.62618	2.791	3.11824	2.64198	2.05205	3.74061	2.22047	2.96769	3.04854	2.43617	2.39842	4.11915	2.75524	2.57207	3.01277	3.30287	3.58462	5.32279
1.55	2.60143	2.87981	2.66302	2.49108	2.99952	2.58373	2.13139	3.21681	3.74715	2.80122	3.39178	2.75617	4.28094	3.20007	2.47457	2.91952	3.17414	2.53673	2.58319	2.69302	2.41352	2.85697	2.48674	2.52151	2.26251	3.44675	2.91867	2.36192	2.99232	3.08801	3.09781	5.26874
1.65	3.00157	2.62556	2.7136	2.99362	2.9965	2.41614	5.28381	3.63556	3.59557	2.74377	2.9186	2.42179	3.8494	3.65901	2.6543	2.64764	3.24315	2.31715	2.27143	3.21849	2.36783	2.63779	2.49917	2.27983	2.21206	3.72773	2.82331	2.59957	3.04298	3.73808	3.88202	4.70458
1.75	2.83461	2.62887	2.61674	3.03479	2.66755	2.52701	2.04095	3.20079	3.71078	2.43068	2.78171	2.18284	4.445	3.70058	2.71936	2.77946	3.41656	2.37442	2.15169	3.78024	2.58765	2.71755	2.90988	1.92021	2.17444	4.00261	3.019	2.52785	2.9176	3.0762	2.9025	5.28213
1.85	2.83148	2.67518	2.65265	2.89109	2.55071	2.85149	1.78495	2.85906	3.52587	2.33004	2.92445	2.85891	4.49447	3.65108	2.78389	2.94241	3.0653	2.63181	2.67673	3.84229	2.71408	2.77159	2.70453	2.19159	2.23211	3.38789	3.29294	3.05638	2.82049	4.03157	2.88589	5.45678
1.95	2.85347	3.15565	3.24862	2.53287	2.54244	3.08855	1.94973	2.99348	3.83397	2.38455	2.75459	2.56545	4.61027	3.28373	2.52718	3.26689	3.26195	2.62486	2.6409	4.15047	2.31526	3.01942	2.97384	2.00325	2.20205	3.79005	3.07958	3.09668	3.03253	3.87846	3.57019	6.91404
2.05	2.4146	3.15077	2.77092	1.76944	1.91536	2.66261	3.41611	2.81607	3.37107	2.89727	2.95288	3.24394	4.53287	3.837	2.09441	4.02841	3.68679	2.3308	2.1983	3.55055	2.35449	2.14901	2.74596	1.8121	2.1563	4.29172	2.66472	3.35987	2.84648	4.86137	3.72443	6.74096
2.15	2.60556	3.00553	2.53731	2.27774	2.20763	2.28185	2.38116	2.96564	3.65792	3.02991	3.0004	2.41919	4.41343	3.73468	2.31101	2.97979	3.49503	2.13363	2.20048	3.4298	1.75473	3.03696	2.88626	2.06835	2.07353	3.99734	2.98573	3.05527	2.27085	3.88509	4.49253	6.44877
2.25	2.21553	2.61462	2.56695	3.19357	2.04691	2.32235	2.5991	3.08469	3.71419	2.53868	3.17201	3.13003	4.80384	4.08014	2.12519	3.22042	3.43597	2.23982	1.4947	3.8919	1.84017	3.10999	3.3396	1.92376	2.69776	4.10454	2.76341	3.11188	2.25855	5.97181	4.63558	6.76609
2.35	2.65459	3.55159	2.86125	2.28756	1.94042	2.59168	3.36887	3.41059	3.64607	2.32428	3.17577	3.30778	4.45458	4.26175	2.12688	3.43751	3.52329	2.1178	2.07943	3.82955	1.95575	3.20519	3.50416	1.77084	2.53631	4.02938	2.7599	2.95739	2.39385	5.904	4.2625	7.03113
2.45	2.71287	2.96889	2.41066	2.14598	2.39856	2.33057	2.24862	2.97242	3.62314	2.83071	2.80623	2.75262	4.36656	3.74529	2.19792	2.9656	3.80704	2.29843	2.69372	3.88123	1.75414	3.09916	3.77145	1.73303	2.49124	4.05965	2.91441	2.63732	2.39696	4.56971	4.46572	7.0562
2.55	2.33345	2.83359	2.53086	2.07327	2.10669	2.27342	2.26515	3.08963	3.73288	2.26272	3.25593	3.01483	4.75281	3.66117	1.99335	2.93244	3.27323	2.20863	2.09853	3.76623	1.93948	3.29196	2.85309	2.03104	2.23706	4.65462	3.31413	3.00208	2.77912	4.57076	4.318	6.79309
2.65	2.51005	2.91324	2.61465	2.82176	2.26604	2.2371	1.70249	3.21727	3.64232	2.18557	2.62548	2.91826	4.54438	3.69839	2.21495	3.38401	3.57131	2.01039	2.12278	3.78727	2.249	3.09739	3.72183	1.90877	2.12298	4.17431	3.03104	2.62092	2.2792	6.25783	3.9484	7.15625
2.75	2.59726	3.08836	2.48074	2.03164	2.30126	2.46236	2.02115	2.779	3.63261	1.96059	2.89175	3.49459	3.98634	3.68694	1.82915	3.48914	3.50126	2.00677	3.12145	3.42221	1.7285	3.04612	3.50741	2.27941	1.91475	3.92277	3.2802	2.71605	2.2356	4.76975	5.00347	6.73718
2.85	2.48408	2.78125	2.92561	2.57454	2.52001	2.13532	1.82867	2.63046	3.70649	1.93077	2.89356	2.97103	4.20108	3.64376	1.95375	3.7247	3.40112	2.4135	3.31125	2.99849	2.0566	2.8353	2.46554	2.22864	2.02703	3.47008	2.92382	2.76023	2.27631	4.40896	3.949	6.44859
2.95	2.78311	2.71678	2.50684	3.07722	2.6964	2.22238	3.17074	2.99927	3.45577	2.08902	2.554	3.20277	3.9615	2.95342	2.09922	3.39819	3.35531	2.26962	2.40296	3.08416	1.897	2.85524	2.76127	2.04802	1.82882	3.34157	2.98449	2.89228	3.03761	3.94975	3.83176	5.35504
3.05	2.58696	2.9199	2.60919	2.29858	2.63407	2.57133	2.05755	3.10757	3.60237	2.53847	2.70163	3.00573	4.18162	3.0465	1.94586	3.13382	3.22133	2.24568	2.70886	3.30003	2.00488	3.15069	3.03807	2.28934	2.06395	3.01118	2.53149	2.44664	2.73038	3.04988	3.62278	4.89059
3.15	2.85789	2.66748	2.67401	2.66193	2.58913	2.68568	2.92864	3.13428	3.70086	2.99756	3.11304	2.78649	4.39773	3.24859	2.37174	2.96668	3.32472	2.81552	2.71763	2.97031	2.17555	3.27938	2.43573	2.55692	2.27152	3.43071	3.19355	2.79598	3.08467	2.7887	3.82183	4.55397
3.25	2.77781	2.61511	2.91306	2.66994	3.08854	2.60886	2.2121	3.45068	3.75411	2.534	2.88412	2.49049	4.30572	3.20357	2.38099	2.61932	3.29803	2.60665	2.63649	3.60052	2.10287	3.25166	3.1181	2.55551	2.45836	3.2521	2.85551	2.60185	3.20373	3.11172	4.06487	4.84446
3.35	2.73672	2.63345	2.53349	2.63658	2.99623	2.43766	2.02706	3.12029	3.8759	2.37407	3.0126	2.85028	4.01682	3.32722	2.39857	2.78203	3.28843	2.49379	2.48699	3.44613	1.72634	2.61048	2.88678	2.29181	2.33021	3.57313	2.89871	2.76951	3.12822	3.05886	4.30451	5.05008
3.45	2.77919	2.59802	2.96369	2.85185	2.87402	2.82197	1.97724	3.0564	3.7497	2.29678	3.27976	3.00166	4.51507	3.48389	2.62618	2.791	3.11824	2.64198	2.05205	3.74061	2.22047	2.96769	3.04854	2.43617	2.39842	4.11915	2.75524	2.57207	3.01277	3.30287	3.58462	5.32279
3.55	2.60143	2.87981	2.66302	2.49108	2.99952	2.58373	2.13139	3.21681	3.74715	2.80122	3.39178	2.75617	4.28094	3.20007	2.47457	2.91952	3.17414	2.53673	2.58319	2.69302	2.41352	2.85697	2.48674	2.52151	2.26251	3.44675	2.91867	2.36192	2.99232	3.08801	3.09781	5.26874
3.65	3.00157	2.62556	2.7136	2.99362	2.9965	2.41614	5.28381	3.63556	3.59557	2.74377	2.9186	2.42179	3.8494	3.65901	2.6543	2.64764	3.24315	2.31715	2.27143	3.21849	2.36783	2.63779	2.49917	2.27983	2.21206	3.72773	2.82331	2.59957	3.04298	3.73808	3.88202	4.70458
3.75	2.83461	2.62887	2.61674	3.03479	2.66755	2.52701	2.04095	3.20079	3.71078	2.43068	2.78171	2.18284	4.445	3.70058	2.71936	2.77946	3.41656	2.37442	2.15169	3.78024	2.58765	2.71755	2.90988	1.92021	2.17444	4.00261	3.019	2.52785	2.9176	3.0762	2.9025	5.28213
3.85	2.83148	2.67518	2.65265	2.89109	2.55071	2.85149	1.78495	2.85906	3.52587	2.33004	2.92445	2.85891	4.49447	3.65108	2.78389	2.94241	3.0653	2.63181	2.67673	3.84229	2.71408	2.77159	2.70453	2.19159	2.23211	3.38789	3.29294	3.05638	2.82049	4.03157	2.88589	5.45678
3.95	2.85347	3.15565	3.24862	2.53287	2.54244	3.08855	1.94973	2.99348	3.83397	2.38455	2.75459	2.56545	4.61027	3.28373	2.52718	3.26689	3.26195	2.62486	2.6409	4.15047	2.31526	3.01942	2.97384	2.00325	2.20205	3.79005	3.07958	3.09668	3.03253	3.87846	3.57019	6.91404

## Sheet: CA1 State Vm std
0	523101	524302	524303	522902	522402	523201	522503	524401	522802	522703	522701	524304	522202	522403	522002	522702	523002	522001	521701	524301	522101	522401	523001	522201	522502	522501	659203	522203	522301	522801	524305	521801
0.05	4.41784	2.50358	4.95943	2.67984	4.54042	2.43259	1.97113	1.66066	3.34495	2.19339	2.20209	2.55402	2.94535	1.81588	2.56671	3.50707	1.37077	1.32846	1.58896	3.35151	1.81759	2.08291	2.7547	3.21059	2.18234	1.80754	2.48136	4.27317	3.27929	3.21666	5.1305	9.84178
0.15	4.64975	2.23279	4.82048	2.48496	4.28757	2.04121	1.81113	1.79256	3.10809	1.69242	1.63052	2.67007	2.01031	1.41523	1.58521	3.08517	1.29134	1.11238	1.61489	3.72674	1.81304	1.28345	3.58272	2.31095	1.92266	2.9014	2.66095	3.73979	3.61109	3.15168	4.37523	8.06139
0.25	5.50355	2.15349	4.77304	1.77833	3.82992	2.06812	1.84337	1.46407	3.23559	1.67612	1.30736	2.85281	1.76036	2.22333	1.50522	2.78735	1.25531	1.1441	1.65132	4.47457	1.47644	1.30264	3.09261	2.27201	2.73479	2.60164	3.01626	3.57821	3.02534	3.75959	4.67357	8.27563
0.35	6.04136	2.26896	4.8751	2.35031	3.5333	2.05462	1.88526	1.80695	3.05997	1.76298	1.3282	2.59257	1.88266	1.44751	1.34551	2.77994	1.14937	1.10545	1.65673	4.46636	1.67062	1.01565	2.65623	2.13379	2.41899	3.25233	3.00229	3.63147	2.89116	4.44017	4.38598	7.7185
0.45	7.0359	2.41741	5.47217	1.97917	3.84528	1.92418	2.05763	1.94279	3.59782	1.96358	1.19964	3.14691	1.75668	1.58801	1.29249	2.91798	1.28319	1.26442	1.64532	3.05864	1.66715	1.45406	3.71311	2.21545	2.36899	2.95581	3.56581	3.18539	2.99579	3.76543	4.34724	8.03457
0.55	5.88103	2.26905	5.89248	2.06786	3.3651	2.14864	1.64143	1.75279	3.21649	1.9137	1.17213	3.2359	1.59162	1.35728	1.40425	2.74804	1.18001	1.13329	1.82352	3.69138	1.72512	1.33899	3.45465	2.6471	2.26317	2.88352	3.33133	3.43019	2.65581	2.66537	4.08317	7.49111
0.65	6.69866	2.38234	6.0639	2.18824	4.13463	2.03052	2.12801	1.55225	3.28932	1.80838	1.25708	3.16646	1.6256	1.69047	1.50252	2.99533	1.29294	1.11243	1.682	3.73264	1.88707	1.29991	4.66948	2.71381	2.15074	2.97317	2.9298	3.9195	2.69309	2.67007	4.21346	7.11227
0.75	5.9622	2.10242	6.64375	2.05957	3.94143	1.93338	1.87279	1.74281	3.18197	1.61165	1.17509	2.84569	1.41244	1.32129	1.3211	2.52948	1.25416	1.24281	1.64833	3.1727	1.81384	1.86242	1.64131	2.71827	1.86562	3.0953	3.42098	3.56901	2.61827	2.9892	3.29319	6.71017
0.85	6.21218	2.43382	6.64624	2.50833	3.77186	2.01827	2.14896	1.44216	3.51828	2.18785	1.15832	3.14616	1.62117	1.54453	1.42304	2.91912	1.197	1.10179	1.64932	3.88887	1.55592	2.12569	2.238	3.19305	2.24987	3.3941	2.76459	3.6395	2.7152	3.5658	4.30879	6.93613
0.95	5.60934	2.59979	7.45145	2.79097	4.021	2.35772	2.45548	1.67956	3.55997	2.08935	1.3983	3.23039	2.77615	2.70316	1.58553	2.95226	1.48271	1.22077	1.85972	4.12051	2.05559	2.36994	3.11793	3.17503	1.85457	2.93405	2.92387	3.86508	3.07918	3.09585	3.10308	6.41314
1.05	5.06775	3.15308	4.99326	2.59934	4.7947	2.53011	2.57712	2.47021	3.48746	2.38862	2.20423	4.62898	2.43861	1.9108	1.90271	2.97876	1.7173	1.76128	1.82045	2.99759	2.16935	2.10971	2.66597	3.3616	2.4555	2.86119	3.2925	2.78746	2.67264	3.21642	3.20605	5.64899
1.15	4.73683	3.25028	4.31784	2.85361	5.66652	3.2048	2.72304	2.57658	3.67866	2.86875	1.97159	4.29355	2.69943	1.95715	2.0003	3.4827	1.95027	1.72159	2.42623	3.70748	2.82878	1.71464	3.96002	2.89118	2.57825	3.40165	2.89326	2.87215	2.88574	2.52237	3.21087	5.18454
1.25	4.98007	3.71191	4.71891	3.00092	4.98825	3.17534	3.02306	3.01263	3.50078	3.5107	2.10772	3.97349	2.43009	2.29858	2.12625	3.29429	1.94085	1.62979	2.29579	4.16076	2.25475	2.53614	3.59102	3.31367	2.29563	3.47862	3.13019	3.07615	2.7867	2.63332	3.62173	5.85168
1.35	5.20198	2.42383	4.27679	2.96959	4.21913	3.22158	2.7542	2.90994	3.47974	3.27789	2.30222	3.73761	3.03878	2.21475	2.21526	2.95582	2.19171	1.75721	2.26073	3.81026	2.23323	2.46369	3.94908	2.78979	2.75887	2.63109	3.00315	3.62401	3.41907	3.68091	3.38504	5.41057
1.45	4.9674	3.33525	5.40703	2.67782	3.87341	2.93874	2.6191	2.39283	2.90987	2.43615	2.04719	3.97834	2.22177	2.34076	2.12315	3.10368	2.05416	2.4662	1.78012	3.45972	2.54521	1.96823	2.66251	2.72751	2.82682	3.08424	2.73921	4.04045	2.72122	3.02458	3.7031	5.64057
1.55	5.65918	3.2071	4.45825	2.69059	4.30425	2.68595	2.51737	2.44149	3.51908	2.60997	2.19077	4.20615	2.75234	2.33947	2.09239	3.50769	1.7942	2.00249	2.47647	3.85169	2.47874	2.62526	3.24339	2.45531	2.55035	3.13699	2.80213	3.44777	2.75672	2.78992	3.8646	5.10728
1.65	5.2481	2.89025	4.70427	3.27708	3.71979	2.72017	2.34112	3.5202	3.32653	2.8107	2.09252	3.82357	2.90658	2.1094	2.06859	3.30875	2.12279	1.72549	2.1948	3.99849	2.2315	1.99354	2.92024	3.03115	2.24188	2.4606	3.2628	2.9847	3.0249	3.10512	3.91487	5.0852
1.75	4.43001	3.0725	4.18842	2.62763	3.90655	2.70237	2.53387	2.92327	3.17927	3.22089	2.46986	3.94448	2.40889	2.3324	2.06852	3.48029	1.90398	1.91771	2.24058	4.00605	2.01701	3.75797	4.3592	2.42024	2.27077	3.15885	2.98272	2.94916	3.18268	3.83154	3.58202	5.80816
1.85	5.03504	3.16339	4.70552	2.73722	4.08419	2.71043	2.79865	2.62153	3.20622	3.21005	2.24494	3.97081	2.68118	2.29366	2.0524	3.4932	2.40975	1.64687	1.89579	3.65945	2.22481	1.73565	3.05887	2.5747	2.67695	2.89888	2.97258	2.86014	3.18501	3.52599	3.58703	6.23654
1.95	4.90228	3.44468	4.64298	2.78681	4.77411	3.08888	3.08359	2.1055	3.32952	3.44254	2.36277	3.96913	2.75938	2.36458	2.12236	3.96051	2.00392	1.89195	1.9847	4.02387	2.05034	1.67626	3.58036	3.39794	2.19859	2.95037	2.84418	2.55047	3.75381	2.97106	4.00407	10.2543
2.05	4.41784	2.50358	4.95943	2.67984	4.54042	2.43259	1.97113	1.66066	3.34495	2.19339	2.20209	2.55402	2.94535	1.81588	2.56671	3.50707	1.37077	1.32846	1.58896	3.35151	1.81759	2.08291	2.7547	3.21059	2.18234	1.80754	2.48136	4.27317	3.27929	3.21666	5.1305	9.84178
2.15	4.64975	2.23279	4.82048	2.48496	4.28757	2.04121	1.81113	1.79256	3.10809	1.69242	1.63052	2.67007	2.01031	1.41523	1.58521	3.08517	1.29134	1.11238	1.61489	3.72674	1.81304	1.28345	3.58272	2.31095	1.92266	2.9014	2.66095	3.73979	3.61109	3.15168	4.37523	8.06139
2.25	5.50355	2.15349	4.77304	1.77833	3.82992	2.06812	1.84337	1.46407	3.23559	1.67612	1.30736	2.85281	1.76036	2.22333	1.50522	2.78735	1.25531	1.1441	1.65132	4.47457	1.47644	1.30264	3.09261	2.27201	2.73479	2.60164	3.01626	3.57821	3.02534	3.75959	4.67357	8.27563
2.35	6.04136	2.26896	4.8751	2.35031	3.5333	2.05462	1.88526	1.80695	3.05997	1.76298	1.3282	2.59257	1.88266	1.44751	1.34551	2.77994	1.14937	1.10545	1.65673	4.46636	1.67062	1.01565	2.65623	2.13379	2.41899	3.25233	3.00229	3.63147	2.89116	4.44017	4.38598	7.7185
2.45	7.0359	2.41741	5.47217	1.97917	3.84528	1.92418	2.05763	1.94279	3.59782	1.96358	1.19964	3.14691	1.75668	1.58801	1.29249	2.91798	1.28319	1.26442	1.64532	3.05864	1.66715	1.45406	3.71311	2.21545	2.36899	2.95581	3.56581	3.18539	2.99579	3.76543	4.34724	8.03457
2.55	5.88103	2.26905	5.89248	2.06786	3.3651	2.14864	1.64143	1.75279	3.21649	1.9137	1.17213	3.2359	1.59162	1.35728	1.40425	2.74804	1.18001	1.13329	1.82352	3.69138	1.72512	1.33899	3.45465	2.6471	2.26317	2.88352	3.33133	3.43019	2.65581	2.66537	4.08317	7.49111
2.65	6.69866	2.38234	6.0639	2.18824	4.13463	2.03052	2.12801	1.55225	3.28932	1.80838	1.25708	3.16646	1.6256	1.69047	1.50252	2.99533	1.29294	1.11243	1.682	3.73264	1.88707	1.29991	4.66948	2.71381	2.15074	2.97317	2.9298	3.9195	2.69309	2.67007	4.21346	7.11227
2.75	5.9622	2.10242	6.64375	2.05957	3.94143	1.93338	1.87279	1.74281	3.18197	1.61165	1.17509	2.84569	1.41244	1.32129	1.3211	2.52948	1.25416	1.24281	1.64833	3.1727	1.81384	1.86242	1.64131	2.71827	1.86562	3.0953	3.42098	3.56901	2.61827	2.9892	3.29319	6.71017
2.85	6.21218	2.43382	6.64624	2.50833	3.77186	2.01827	2.14896	1.44216	3.51828	2.18785	1.15832	3.14616	1.62117	1.54453	1.42304	2.91912	1.197	1.10179	1.64932	3.88887	1.55592	2.12569	2.238	3.19305	2.24987	3.3941	2.76459	3.6395	2.7152	3.5658	4.30879	6.93613
2.95	5.60934	2.59979	7.45145	2.79097	4.021	2.35772	2.45548	1.67956	3.55997	2.08935	1.3983	3.23039	2.77615	2.70316	1.58553	2.95226	1.48271	1.22077	1.85972	4.12051	2.05559	2.36994	3.11793	3.17503	1.85457	2.93405	2.92387	3.86508	3.07918	3.09585	3.10308	6.41314
3.05	5.06775	3.15308	4.99326	2.59934	4.7947	2.53011	2.57712	2.47021	3.48746	2.38862	2.20423	4.62898	2.43861	1.9108	1.90271	2.97876	1.7173	1.76128	1.82045	2.99759	2.16935	2.10971	2.66597	3.3616	2.4555	2.86119	3.2925	2.78746	2.67264	3.21642	3.20605	5.64899
3.15	4.73683	3.25028	4.31784	2.85361	5.66652	3.2048	2.72304	2.57658	3.67866	2.86875	1.97159	4.29355	2.69943	1.95715	2.0003	3.4827	1.95027	1.72159	2.42623	3.70748	2.82878	1.71464	3.96002	2.89118	2.57825	3.40165	2.89326	2.87215	2.88574	2.52237	3.21087	5.18454
3.25	4.98007	3.71191	4.71891	3.00092	4.98825	3.17534	3.02306	3.01263	3.50078	3.5107	2.10772	3.97349	2.43009	2.29858	2.12625	3.29429	1.94085	1.62979	2.29579	4.16076	2.25475	2.53614	3.59102	3.31367	2.29563	3.47862	3.13019	3.07615	2.7867	2.63332	3.62173	5.85168
3.35	5.20198	2.42383	4.27679	2.96959	4.21913	3.22158	2.7542	2.90994	3.47974	3.27789	2.30222	3.73761	3.03878	2.21475	2.21526	2.95582	2.19171	1.75721	2.26073	3.81026	2.23323	2.46369	3.94908	2.78979	2.75887	2.63109	3.00315	3.62401	3.41907	3.68091	3.38504	5.41057
3.45	4.9674	3.33525	5.40703	2.67782	3.87341	2.93874	2.6191	2.39283	2.90987	2.43615	2.04719	3.97834	2.22177	2.34076	2.12315	3.10368	2.05416	2.4662	1.78012	3.45972	2.54521	1.96823	2.66251	2.72751	2.82682	3.08424	2.73921	4.04045	2.72122	3.02458	3.7031	5.64057
3.55	5.65918	3.2071	4.45825	2.69059	4.30425	2.68595	2.51737	2.44149	3.51908	2.60997	2.19077	4.20615	2.75234	2.33947	2.09239	3.50769	1.7942	2.00249	2.47647	3.85169	2.47874	2.62526	3.24339	2.45531	2.55035	3.13699	2.80213	3.44777	2.75672	2.78992	3.8646	5.10728
3.65	5.2481	2.89025	4.70427	3.27708	3.71979	2.72017	2.34112	3.5202	3.32653	2.8107	2.09252	3.82357	2.90658	2.1094	2.06859	3.30875	2.12279	1.72549	2.1948	3.99849	2.2315	1.99354	2.92024	3.03115	2.24188	2.4606	3.2628	2.9847	3.0249	3.10512	3.91487	5.0852
3.75	4.43001	3.0725	4.18842	2.62763	3.90655	2.70237	2.53387	2.92327	3.17927	3.22089	2.46986	3.94448	2.40889	2.3324	2.06852	3.48029	1.90398	1.91771	2.24058	4.00605	2.01701	3.75797	4.3592	2.42024	2.27077	3.15885	2.98272	2.94916	3.18268	3.83154	3.58202	5.80816
3.85	5.03504	3.16339	4.70552	2.73722	4.08419	2.71043	2.79865	2.62153	3.20622	3.21005	2.24494	3.97081	2.68118	2.29366	2.0524	3.4932	2.40975	1.64687	1.89579	3.65945	2.22481	1.73565	3.05887	2.5747	2.67695	2.89888	2.97258	2.86014	3.18501	3.52599	3.58703	6.23654
3.95	4.90228	3.44468	4.64298	2.78681	4.77411	3.08888	3.08359	2.1055	3.32952	3.44254	2.36277	3.96913	2.75938	2.36458	2.12236	3.96051	2.00392	1.89195	1.9847	4.02387	2.05034	1.67626	3.58036	3.39794	2.19859	2.95037	2.84418	2.55047	3.75381	2.97106	4.00407	10.2543

## Sheet: DG State Vm_slow std
0	523502	524002	523501	523701	523801	524203	523301	524102	524001	523302	524003	524202	523601	523401	524201	659201	523402	524101	659202	523901	523702	523602
0.05	2.69122	3.08549	1.78923	1.77297	2.87161	1.61581	1.77997	1.55344	2.67813	1.51248	3.28973	1.37773	2.01955	1.21953	1.28758	1.68104	1.71815	1.35116	1.67594	1.32349	2.93718	5.23862
0.15	2.95725	2.32023	1.88055	1.81169	4.16368	1.67673	1.89049	1.55724	2.78791	1.65668	4.02428	1.54015	2.10329	1.29841	1.01226	2.06508	1.58034	1.47912	1.84457	1.34838	2.65911	6.02448
0.25	3.04551	1.89937	1.96746	1.86654	3.45451	1.71203	1.81274	1.49625	3.04073	1.90538	4.06225	1.68519	2.2107	1.18805	1.06816	2.00086	1.34866	1.56147	1.71202	1.8723	2.97129	5.55018
0.35	2.83011	1.838	2.05839	1.90782	3.44131	1.59829	1.8896	1.57867	2.81426	2.13712	4.04451	1.54213	2.32202	1.40022	0.991818	1.98832	1.31841	1.507	1.76497	2.89741	2.80339	5.59895
0.45	2.97992	1.52954	1.73942	1.73493	3.24802	1.72192	2.14783	1.60004	2.9117	1.97569	3.99261	1.40387	2.0977	1.21703	1.11244	1.98706	1.38105	1.50485	1.83681	2.74216	2.81165	6.22015
0.55	2.78373	1.83373	1.77238	1.52117	3.03831	1.57506	2.2726	1.7629	2.78675	2.14185	3.78945	1.53232	2.17468	1.35306	1.11728	2.10163	1.31594	1.51676	1.72683	2.18794	2.90318	5.85027
0.65	2.66647	1.84049	1.84091	1.65115	2.67205	1.30236	2.61379	1.71467	2.8897	1.61993	3.90924	1.41002	1.87058	1.42857	1.02171	2.24095	1.3835	1.35288	1.83201	2.578	3.15931	5.65446
0.75	2.69052	1.88936	2.0126	1.67848	2.662	1.50426	2.66575	1.67693	2.83331	2.08676	4.20965	1.51717	1.97061	1.47073	1.09753	1.91673	1.27	1.47322	1.64841	2.75557	3.21349	5.82023
0.85	2.47205	1.79901	1.81374	1.83427	2.67117	1.38278	2.66722	1.61415	2.59899	1.96439	3.8316	1.34813	1.9599	1.2696	1.3123	1.92175	1.20604	1.55994	1.89771	1.42297	2.90388	5.18407
0.95	2.11112	1.87324	1.90072	1.94233	2.67643	1.59078	2.38203	1.5906	2.45796	2.08134	3.4123	1.28551	1.96288	1.33017	1.20021	1.80894	1.21467	1.40673	1.71619	1.23257	2.8948	5.00229
1.05	2.69726	2.25029	1.55828	2.11361	2.65094	1.58849	1.96396	1.61199	1.88181	2.09225	2.3116	1.2693	2.19569	1.27095	1.34069	1.57349	1.06256	1.47174	1.49869	1.39679	2.1556	3.53885
1.15	2.46031	2.18875	1.65839	1.94982	2.23166	1.56212	1.79716	2.10234	1.81308	1.89598	2.24198	1.46891	2.04325	1.05609	1.33573	1.53059	0.970838	1.50952	1.75078	1.4107	2.51726	3.71243
1.25	2.29576	2.26957	1.71571	2.21622	2.31107	1.61932	1.98667	1.83654	1.92817	2.11027	2.161	1.48341	2.10688	1.07002	1.38978	1.74992	1.26375	1.56286	1.74271	1.46953	2.36057	3.45704
1.35	2.62399	2.22374	1.75326	2.0081	2.39439	1.38331	2.02604	1.73534	1.72787	1.75747	2.53432	1.55814	2.05434	1.02465	1.42753	1.55458	1.15683	1.58497	1.78352	1.47065	2.33923	4.1496
1.45	2.31405	1.68679	1.54043	2.12935	2.29343	1.48167	1.73709	1.61099	1.84858	1.7507	2.28833	1.5775	1.76107	0.92546	1.41919	1.85104	1.249	1.39183	1.80625	1.42406	2.16093	3.65209
1.55	2.22003	2.00992	1.52469	1.90295	2.48834	1.71664	1.89175	1.51466	1.81401	1.97652	2.41378	1.50647	1.84097	1.06821	1.35174	1.68209	1.26664	1.49201	1.69984	1.42372	2.32543	3.87902
1.65	2.27962	2.74619	1.66993	1.94427	2.7474	1.55769	1.93441	1.6377	1.77251	1.565	2.18247	1.66258	1.99285	1.10522	1.44384	1.71066	1.01783	1.40164	1.661	1.34312	2.20544	3.66947
1.75	2.30481	2.11677	1.70752	1.87007	2.63269	1.66835	1.79301	1.47622	2.49235	1.73251	2.04186	1.51058	1.97733	1.09831	1.35907	1.84922	1.08919	1.41894	1.62844	1.47649	1.96587	3.57385
1.85	2.63803	2.30009	1.51491	2.03262	2.66748	1.78427	1.70823	1.38927	2.43513	1.53897	2.47678	1.3842	2.10329	0.954321	1.35166	1.87958	1.06852	1.49481	1.6396	1.15186	2.39743	3.77442
1.95	2.96691	2.80148	1.83978	2.0221	2.39908	1.8781	1.62922	1.5034	2.84573	1.71176	2.51449	1.46032	2.17137	0.967146	1.15992	1.71637	1.09148	1.42191	1.70391	1.13858	2.18487	3.84146
2.05	2.69122	3.08549	1.78923	1.77297	2.87161	1.61581	1.77997	1.55344	2.67813	1.51248	3.28973	1.37773	2.01955	1.21953	1.28758	1.68104	1.71815	1.35116	1.67594	1.32349	2.93718	5.23862
2.15	2.95725	2.32023	1.88055	1.81169	4.16368	1.67673	1.89049	1.55724	2.78791	1.65668	4.02428	1.54015	2.10329	1.29841	1.01226	2.06508	1.58034	1.47912	1.84457	1.34838	2.65911	6.02448
2.25	3.04551	1.89937	1.96746	1.86654	3.45451	1.71203	1.81274	1.49625	3.04073	1.90538	4.06225	1.68519	2.2107	1.18805	1.06816	2.00086	1.34866	1.56147	1.71202	1.8723	2.97129	5.55018
2.35	2.83011	1.838	2.05839	1.90782	3.44131	1.59829	1.8896	1.57867	2.81426	2.13712	4.04451	1.54213	2.32202	1.40022	0.991818	1.98832	1.31841	1.507	1.76497	2.89741	2.80339	5.59895
2.45	2.97992	1.52954	1.73942	1.73493	3.24802	1.72192	2.14783	1.60004	2.9117	1.97569	3.99261	1.40387	2.0977	1.21703	1.11244	1.98706	1.38105	1.50485	1.83681	2.74216	2.81165	6.22015
2.55	2.78373	1.83373	1.77238	1.52117	3.03831	1.57506	2.2726	1.7629	2.78675	2.14185	3.78945	1.53232	2.17468	1.35306	1.11728	2.10163	1.31594	1.51676	1.72683	2.18794	2.90318	5.85027
2.65	2.66647	1.84049	1.84091	1.65115	2.67205	1.30236	2.61379	1.71467	2.8897	1.61993	3.90924	1.41002	1.87058	1.42857	1.02171	2.24095	1.3835	1.35288	1.83201	2.578	3.15931	5.65446
2.75	2.69052	1.88936	2.0126	1.67848	2.662	1.50426	2.66575	1.67693	2.83331	2.08676	4.20965	1.51717	1.97061	1.47073	1.09753	1.91673	1.27	1.47322	1.64841	2.75557	3.21349	5.82023
2.85	2.47205	1.79901	1.81374	1.83427	2.67117	1.38278	2.66722	1.61415	2.59899	1.96439	3.8316	1.34813	1.9599	1.2696	1.3123	1.92175	1.20604	1.55994	1.89771	1.42297	2.90388	5.18407
2.95	2.11112	1.87324	1.90072	1.94233	2.67643	1.59078	2.38203	1.5906	2.45796	2.08134	3.4123	1.28551	1.96288	1.33017	1.20021	1.80894	1.21467	1.40673	1.71619	1.23257	2.8948	5.00229
3.05	2.69726	2.25029	1.55828	2.11361	2.65094	1.58849	1.96396	1.61199	1.88181	2.09225	2.3116	1.2693	2.19569	1.27095	1.34069	1.57349	1.06256	1.47174	1.49869	1.39679	2.1556	3.53885
3.15	2.46031	2.18875	1.65839	1.94982	2.23166	1.56212	1.79716	2.10234	1.81308	1.89598	2.24198	1.46891	2.04325	1.05609	1.33573	1.53059	0.970838	1.50952	1.75078	1.4107	2.51726	3.71243
3.25	2.29576	2.26957	1.71571	2.21622	2.31107	1.61932	1.98667	1.83654	1.92817	2.11027	2.161	1.48341	2.10688	1.07002	1.38978	1.74992	1.26375	1.56286	1.74271	1.46953	2.36057	3.45704
3.35	2.62399	2.22374	1.75326	2.0081	2.39439	1.38331	2.02604	1.73534	1.72787	1.75747	2.53432	1.55814	2.05434	1.02465	1.42753	1.55458	1.15683	1.58497	1.78352	1.47065	2.33923	4.1496
3.45	2.31405	1.68679	1.54043	2.12935	2.29343	1.48167	1.73709	1.61099	1.84858	1.7507	2.28833	1.5775	1.76107	0.92546	1.41919	1.85104	1.249	1.39183	1.80625	1.42406	2.16093	3.65209
3.55	2.22003	2.00992	1.52469	1.90295	2.48834	1.71664	1.89175	1.51466	1.81401	1.97652	2.41378	1.50647	1.84097	1.06821	1.35174	1.68209	1.26664	1.49201	1.69984	1.42372	2.32543	3.87902
3.65	2.27962	2.74619	1.66993	1.94427	2.7474	1.55769	1.93441	1.6377	1.77251	1.565	2.18247	1.66258	1.99285	1.10522	1.44384	1.71066	1.01783	1.40164	1.661	1.34312	2.20544	3.66947
3.75	2.30481	2.11677	1.70752	1.87007	2.63269	1.66835	1.79301	1.47622	2.49235	1.73251	2.04186	1.51058	1.97733	1.09831	1.35907	1.84922	1.08919	1.41894	1.62844	1.47649	1.96587	3.57385
3.85	2.63803	2.30009	1.51491	2.03262	2.66748	1.78427	1.70823	1.38927	2.43513	1.53897	2.47678	1.3842	2.10329	0.954321	1.35166	1.87958	1.06852	1.49481	1.6396	1.15186	2.39743	3.77442
3.95	2.96691	2.80148	1.83978	2.0221	2.39908	1.8781	1.62922	1.5034	2.84573	1.71176	2.51449	1.46032	2.17137	0.967146	1.15992	1.71637	1.09148	1.42191	1.70391	1.13858	2.18487	3.84146

## Sheet: CA3 State Vm_slow std
0	525301	521502	525101	520901	525001	659105	719301	525403	521303	521602	580501	525404	580201	521304	580601	719002	520701	526202	719303	521401	719001	719103	521101	659101	521501	521102	719201	521302	525003	521202	520702	719202
0.05	1.61998	1.75162	1.6204	1.32163	1.12543	1.8084	1.65665	1.98365	2.37027	2.49402	1.55717	2.13497	3.06935	2.55498	1.4248	2.13122	2.58189	1.1947	1.79421	2.47374	1.22666	1.48284	1.47305	0.97713	1.16502	2.69612	1.56387	1.57323	1.39474	3.77343	2.43127	4.59887
0.15	1.65318	1.70755	2.03847	1.55051	1.18323	1.70728	1.50979	2.17384	2.63495	2.29814	1.95701	1.8737	3.32796	2.609	1.32194	2.09408	2.60162	1.07963	2.14299	2.59027	1.18864	2.00485	1.75378	1.07624	1.17868	2.77929	1.71392	1.70842	1.31138	3.39821	2.97989	4.75036
0.25	1.44172	1.88118	1.85172	2.33894	1.15461	1.58942	1.99072	2.48235	2.73824	2.03285	2.1691	2.57294	3.74792	2.84546	1.35502	2.00425	2.57441	1.082	0.861543	2.95066	1.10334	2.15454	1.63357	1.01089	1.30576	2.85003	1.65255	1.58103	1.22948	4.59734	3.11522	4.82883
0.35	1.79724	2.25197	1.9695	1.63778	1.22202	1.57956	2.75523	2.55232	2.81768	1.73072	2.20441	2.49232	3.76324	3.08577	1.29237	2.41269	2.46616	1.18654	1.07868	2.90251	1.1607	2.19203	1.62398	0.949845	1.55314	2.9058	1.63465	1.63011	1.23192	4.61202	2.73482	5.03337
0.45	1.95402	1.95535	1.61577	1.46357	1.34538	1.60442	2.06093	2.74229	2.59433	1.82019	1.71576	2.33571	3.38473	2.53692	1.32205	2.28237	2.68155	1.17654	0.963219	2.96419	1.17543	1.84363	1.70429	1.14889	1.50321	3.22315	1.7069	1.55654	1.20658	3.03024	3.13734	5.10247
0.55	1.67217	1.7643	1.66392	1.54856	1.29495	1.52222	1.49073	2.54048	2.55061	1.44201	1.87103	2.19932	3.38931	2.77887	1.38673	2.26841	2.48022	1.18648	0.936242	3.10894	1.1319	2.48742	1.54474	1.09276	1.24692	3.52019	1.74855	1.36054	1.29072	3.47259	3.21683	4.9045
0.65	1.52297	1.7195	1.68627	1.64595	1.34586	1.31381	0.957201	2.43244	2.42336	1.15475	1.86656	2.37379	3.27384	2.52606	1.36257	2.49945	2.54523	1.08414	1.07547	2.48781	1.15363	2.27373	1.86085	1.06353	1.14829	3.0158	1.7347	1.27113	1.23881	4.01995	3.16374	5.01645
0.75	1.67996	1.87168	1.52219	1.85189	1.16412	1.42301	1.68411	2.03118	2.51728	0.892497	1.60767	2.82801	3.11408	2.41501	1.1854	2.40866	2.4408	1.24361	2.37186	2.47008	1.13035	2.26553	1.68179	1.22107	1.16736	2.55914	1.77999	1.25953	1.21423	3.65391	3.49903	4.91561
0.85	1.76725	1.54663	1.754	1.38821	1.23252	1.28992	1.18353	1.81676	2.37748	1.40001	1.63078	1.92293	2.83595	2.29424	1.1502	2.29677	2.32959	1.23018	1.73597	2.13019	1.09203	2.03937	1.5915	1.17005	1.06541	2.21412	1.65922	1.47342	1.32247	3.11085	2.89474	4.57121
0.95	1.59406	1.83448	1.49655	2.23392	1.48348	1.68673	1.88013	1.90902	2.29009	1.5152	1.61662	2.20632	2.68872	1.81075	1.14098	1.96495	2.0848	1.18647	1.47475	2.10808	1.2536	1.49022	1.50706	1.17144	1.10877	2.18423	1.72194	1.13864	1.37145	2.58311	2.28348	3.88546
1.05	1.39641	1.3222	1.47099	1.15158	1.26661	1.4301	1.22242	1.85608	2.13412	1.69173	1.58486	2.04066	3.10301	1.9704	0.949586	2.11678	1.97408	1.51994	1.19572	2.40706	1.02816	2.00667	1.41092	1.3692	1.04936	1.78265	1.55214	0.962542	1.48773	1.83521	2.64773	3.4971
1.15	1.57952	1.27203	1.55509	1.64325	1.37232	1.40186	1.11928	2.02537	2.39884	2.57269	1.56323	1.87403	3.00777	2.01463	1.27532	1.77748	2.06768	1.64346	1.04189	2.57974	1.25383	2.08096	1.48522	1.35524	1.10851	2.03148	1.68844	1.2816	2.00339	1.50462	2.53658	3.31368
1.25	1.50435	1.24873	1.82093	1.7455	1.47398	1.39334	1.31091	2.14861	2.351	1.68287	1.66223	1.75051	3.0094	1.9686	1.48288	1.61577	2.29949	1.61544	1.20632	2.42933	1.12823	1.63115	1.38735	1.48231	1.28081	1.97676	1.77795	1.1254	2.11942	2.01091	2.70046	3.35284
1.35	1.78637	1.12253	1.82705	1.59197	1.56483	1.37219	1.00364	2.21928	2.59997	1.39439	1.3901	2.02294	3.02119	2.10316	1.43461	1.45267	2.05158	1.18115	1.17561	2.41235	0.978776	1.60775	1.16421	1.49302	1.4039	2.00947	1.74667	1.16451	2.09532	2.10917	2.78597	3.58922
1.45	1.68086	1.12156	1.879	1.66755	1.73266	1.54946	1.13721	2.04097	2.44361	1.26335	1.64506	1.89737	3.16457	2.37273	1.38219	1.65924	2.11529	1.59229	1.1346	2.9144	1.15987	2.00848	1.18896	1.41493	1.37663	2.53428	1.85356	1.26848	2.05312	1.90071	2.49869	3.74145
1.55	1.49758	1.09059	1.65969	1.77163	1.4786	1.2577	1.41875	2.15095	2.3478	1.51003	1.76403	1.68073	3.00822	2.07166	1.48697	1.66863	2.20324	1.59466	1.01713	2.27139	1.38157	1.3397	1.18807	1.31711	1.29873	2.13908	1.85962	1.38092	1.99473	1.49096	2.27806	3.86144
1.65	1.42606	1.29171	1.58975	1.94396	1.61612	1.34984	4.94248	2.46792	2.28579	1.54975	1.70821	1.92745	3.19244	2.26873	1.53168	1.74088	2.09212	1.22736	1.04366	2.7592	1.42602	1.42843	1.15504	1.23799	1.12186	2.35888	1.96684	1.34486	1.90257	2.58592	2.48916	3.70201
1.75	1.70094	1.57231	1.47695	2.25336	1.25421	1.2808	1.50217	1.86999	2.24796	1.5539	1.64875	1.68434	3.35138	2.70234	1.64019	1.68169	2.03907	1.38215	1.15963	2.95399	1.32581	1.67555	1.08333	1.24586	1.14451	2.42369	1.82707	1.33264	1.91221	2.22583	2.33268	3.98168
1.85	1.59609	1.62745	1.4733	1.68893	1.33346	1.49068	0.84167	1.88951	2.09985	1.57723	1.46501	1.76779	3.18614	2.20182	1.57052	1.71403	1.88893	1.38711	1.68852	3.21695	1.37159	1.51441	1.33402	1.05182	1.29105	2.1868	1.85044	1.75158	1.91031	3.32701	2.08784	4.15264
1.95	1.60439	1.89431	1.82251	1.36208	1.3273	1.99454	0.83042	1.59517	2.15431	1.39299	1.56828	1.61113	3.07335	2.24938	1.34486	1.97386	1.95574	1.38779	1.41903	3.02807	1.1307	1.83975	1.18865	0.973483	1.30189	2.02798	1.78386	1.66712	1.85648	3.17432	2.26823	4.48508
2.05	1.61998	1.75162	1.6204	1.32163	1.12543	1.8084	1.65665	1.98365	2.37027	2.49402	1.55717	2.13497	3.06935	2.55498	1.4248	2.13122	2.58189	1.1947	1.79421	2.47374	1.22666	1.48284	1.47305	0.97713	1.16502	2.69612	1.56387	1.57323	1.39474	3.77343	2.43127	4.59887
2.15	1.65318	1.70755	2.03847	1.55051	1.18323	1.70728	1.50979	2.17384	2.63495	2.29814	1.95701	1.8737	3.32796	2.609	1.32194	2.09408	2.60162	1.07963	2.14299	2.59027	1.18864	2.00485	1.75378	1.07624	1.17868	2.77929	1.71392	1.70842	1.31138	3.39821	2.97989	4.75036
2.25	1.44172	1.88118	1.85172	2.33894	1.15461	1.58942	1.99072	2.48235	2.73824	2.03285	2.1691	2.57294	3.74792	2.84546	1.35502	2.00425	2.57441	1.082	0.861543	2.95066	1.10334	2.15454	1.63357	1.01089	1.30576	2.85003	1.65255	1.58103	1.22948	4.59734	3.11522	4.82883
2.35	1.79724	2.25197	1.9695	1.63778	1.22202	1.57956	2.75523	2.55232	2.81768	1.73072	2.20441	2.49232	3.76324	3.08577	1.29237	2.41269	2.46616	1.18654	1.07868	2.90251	1.1607	2.19203	1.62398	0.949845	1.55314	2.9058	1.63465	1.63011	1.23192	4.61202	2.73482	5.03337
2.45	1.95402	1.95535	1.61577	1.46357	1.34538	1.60442	2.06093	2.74229	2.59433	1.82019	1.71576	2.33571	3.38473	2.53692	1.32205	2.28237	2.68155	1.17654	0.963219	2.96419	1.17543	1.84363	1.70429	1.14889	1.50321	3.22315	1.7069	1.55654	1.20658	3.03024	3.13734	5.10247
2.55	1.67217	1.7643	1.66392	1.54856	1.29495	1.52222	1.49073	2.54048	2.55061	1.44201	1.87103	2.19932	3.38931	2.77887	1.38673	2.26841	2.48022	1.18648	0.936242	3.10894	1.1319	2.48742	1.54474	1.09276	1.24692	3.52019	1.74855	1.36054	1.29072	3.47259	3.21683	4.9045
2.65	1.52297	1.7195	1.68627	1.64595	1.34586	1.31381	0.957201	2.43244	2.42336	1.15475	1.86656	2.37379	3.27384	2.52606	1.36257	2.49945	2.54523	1.08414	1.07547	2.48781	1.15363	2.27373	1.86085	1.06353	1.14829	3.0158	1.7347	1.27113	1.23881	4.01995	3.16374	5.01645
2.75	1.67996	1.87168	1.52219	1.85189	1.16412	1.42301	1.68411	2.03118	2.51728	0.892497	1.60767	2.82801	3.11408	2.41501	1.1854	2.40866	2.4408	1.24361	2.37186	2.47008	1.13035	2.26553	1.68179	1.22107	1.16736	2.55914	1.77999	1.25953	1.21423	3.65391	3.49903	4.91561
2.85	1.76725	1.54663	1.754	1.38821	1.23252	1.28992	1.18353	1.81676	2.37748	1.40001	1.63078	1.92293	2.83595	2.29424	1.1502	2.29677	2.32959	1.23018	1.73597	2.13019	1.09203	2.03937	1.5915	1.17005	1.06541	2.21412	1.65922	1.47342	1.32247	3.11085	2.89474	4.57121
2.95	1.59406	1.83448	1.49655	2.23392	1.48348	1.68673	1.88013	1.90902	2.29009	1.5152	1.61662	2.20632	2.68872	1.81075	1.14098	1.96495	2.0848	1.18647	1.47475	2.10808	1.2536	1.49022	1.50706	1.17144	1.10877	2.18423	1.72194	1.13864	1.37145	2.58311	2.28348	3.88546
3.05	1.39641	1.3222	1.47099	1.15158	1.26661	1.4301	1.22242	1.85608	2.13412	1.69173	1.58486	2.04066	3.10301	1.9704	0.949586	2.11678	1.97408	1.51994	1.19572	2.40706	1.02816	2.00667	1.41092	1.3692	1.04936	1.78265	1.55214	0.962542	1.48773	1.83521	2.64773	3.4971
3.15	1.57952	1.27203	1.55509	1.64325	1.37232	1.40186	1.11928	2.02537	2.39884	2.57269	1.56323	1.87403	3.00777	2.01463	1.27532	1.77748	2.06768	1.64346	1.04189	2.57974	1.25383	2.08096	1.48522	1.35524	1.10851	2.03148	1.68844	1.2816	2.00339	1.50462	2.53658	3.31368
3.25	1.50435	1.24873	1.82093	1.7455	1.47398	1.39334	1.31091	2.14861	2.351	1.68287	1.66223	1.75051	3.0094	1.9686	1.48288	1.61577	2.29949	1.61544	1.20632	2.42933	1.12823	1.63115	1.38735	1.48231	1.28081	1.97676	1.77795	1.1254	2.11942	2.01091	2.70046	3.35284
3.35	1.78637	1.12253	1.82705	1.59197	1.56483	1.37219	1.00364	2.21928	2.59997	1.39439	1.3901	2.02294	3.02119	2.10316	1.43461	1.45267	2.05158	1.18115	1.17561	2.41235	0.978776	1.60775	1.16421	1.49302	1.4039	2.00947	1.74667	1.16451	2.09532	2.10917	2.78597	3.58922
3.45	1.68086	1.12156	1.879	1.66755	1.73266	1.54946	1.13721	2.04097	2.44361	1.26335	1.64506	1.89737	3.16457	2.37273	1.38219	1.65924	2.11529	1.59229	1.1346	2.9144	1.15987	2.00848	1.18896	1.41493	1.37663	2.53428	1.85356	1.26848	2.05312	1.90071	2.49869	3.74145
3.55	1.49758	1.09059	1.65969	1.77163	1.4786	1.2577	1.41875	2.15095	2.3478	1.51003	1.76403	1.68073	3.00822	2.07166	1.48697	1.66863	2.20324	1.59466	1.01713	2.27139	1.38157	1.3397	1.18807	1.31711	1.29873	2.13908	1.85962	1.38092	1.99473	1.49096	2.27806	3.86144
3.65	1.42606	1.29171	1.58975	1.94396	1.61612	1.34984	4.94248	2.46792	2.28579	1.54975	1.70821	1.92745	3.19244	2.26873	1.53168	1.74088	2.09212	1.22736	1.04366	2.7592	1.42602	1.42843	1.15504	1.23799	1.12186	2.35888	1.96684	1.34486	1.90257	2.58592	2.48916	3.70201
3.75	1.70094	1.57231	1.47695	2.25336	1.25421	1.2808	1.50217	1.86999	2.24796	1.5539	1.64875	1.68434	3.35138	2.70234	1.64019	1.68169	2.03907	1.38215	1.15963	2.95399	1.32581	1.67555	1.08333	1.24586	1.14451	2.42369	1.82707	1.33264	1.91221	2.22583	2.33268	3.98168
3.85	1.59609	1.62745	1.4733	1.68893	1.33346	1.49068	0.84167	1.88951	2.09985	1.57723	1.46501	1.76779	3.18614	2.20182	1.57052	1.71403	1.88893	1.38711	1.68852	3.21695	1.37159	1.51441	1.33402	1.05182	1.29105	2.1868	1.85044	1.75158	1.91031	3.32701	2.08784	4.15264
3.95	1.60439	1.89431	1.82251	1.36208	1.3273	1.99454	0.83042	1.59517	2.15431	1.39299	1.56828	1.61113	3.07335	2.24938	1.34486	1.97386	1.95574	1.38779	1.41903	3.02807	1.1307	1.83975	1.18865	0.973483	1.30189	2.02798	1.78386	1.66712	1.85648	3.17432	2.26823	4.48508

## Sheet: CA1 State Vm_slow std
0	523101	524302	524303	522902	522402	523201	522503	524401	522802	522703	522701	524304	522202	522403	522002	522702	523002	522001	521701	524301	522101	522401	523001	522201	522502	522501	659203	522203	522301	522801	524305	521801
0.05	3.77706	1.65535	4.418	1.56937	3.51346	1.6618	1.30589	0.999107	2.67754	1.64902	1.22839	2.13289	1.24213	0.800336	1.07235	2.42047	0.699677	0.701231	1.009	2.30061	1.07294	1.19124	1.59476	1.48954	1.08632	1.21418	1.51451	1.87287	1.64826	1.64192	2.82491	4.79068
0.15	4.10799	1.65396	4.07861	1.46349	3.21173	1.54693	1.36012	0.981153	2.39932	1.46291	1.12759	2.12517	1.12124	0.994094	1.0194	2.3691	0.598477	0.784152	1.07121	2.87598	0.968349	1.05772	1.97161	1.13499	1.05921	2.12461	1.86093	2.51689	1.72445	1.97211	2.91518	4.78156
0.25	5.36694	1.6418	4.22829	1.20224	3.12119	1.62992	1.3647	0.826652	2.66926	1.352	0.806537	2.18098	1.02631	1.46683	0.914523	2.3448	0.643207	0.786767	1.08079	2.65734	0.813886	1.03371	2.37111	1.23883	1.67432	2.08848	2.18733	2.26357	1.58142	2.23672	2.78527	4.83877
0.35	5.68717	1.67377	4.38849	1.35905	2.82448	1.50594	1.34915	1.16817	2.39589	1.28369	0.743201	1.87515	1.01164	1.03572	0.79959	2.07378	0.670913	0.765705	1.08943	3.54904	0.959944	0.706591	2.05256	1.09544	1.98731	1.80895	2.41953	2.21887	1.40951	2.28416	2.89554	4.65317
0.45	6.54493	1.49782	5.41331	1.2839	3.0556	1.50596	1.377	1.27659	2.98912	0.991844	0.727265	2.72391	1.10771	1.05624	0.784394	2.1756	0.664198	0.854369	1.13174	2.65821	1.09469	0.737393	2.53182	1.4382	1.58649	1.93143	2.60121	2.03433	1.4066	1.94788	3.02087	4.44324
0.55	5.6276	1.67874	5.63275	1.15885	2.4335	1.55962	1.32919	1.13203	2.65096	1.16006	0.759336	2.3954	0.935337	0.905271	0.755702	2.02258	0.64918	0.900748	1.24345	2.75379	1.2239	0.801951	2.42804	1.5189	1.45361	1.69504	2.46185	2.22647	1.3494	1.64545	2.98593	4.27879
0.65	5.73131	1.62569	5.65476	1.27996	3.28217	1.51329	1.32865	1.00927	2.79283	1.04892	0.748086	2.29045	0.927635	0.806597	0.799475	2.2274	0.690966	0.818594	0.954917	2.98816	1.12369	0.844165	2.14391	1.83449	1.46805	1.94492	2.00854	2.59083	1.40414	1.49985	2.70179	4.13323
0.75	5.61218	1.59123	6.40484	1.21542	2.72377	1.33602	1.2112	0.997312	2.40342	1.15415	0.761747	2.35403	0.934437	0.958791	0.76184	1.95944	0.647767	0.897044	1.0196	2.61722	1.05781	0.89349	1.82113	2.07909	1.41732	1.81463	2.00015	2.20845	1.37843	1.87372	2.40461	4.02897
0.85	5.33221	1.68972	6.04133	1.22222	2.87148	1.45238	1.19972	0.904595	2.74918	1.33883	0.740488	2.04433	1.06492	0.936139	0.663626	2.27569	0.655574	0.865966	1.05071	2.92715	1.07477	0.852518	1.9409	1.87412	1.3934	2.22659	1.86935	2.50665	1.48513	2.13876	3.40073	4.05817
0.95	5.06826	1.903	6.52488	1.27289	2.65122	1.45001	1.30833	0.840464	2.61792	1.12738	0.751026	2.14027	1.29397	1.1509	0.739529	2.07597	0.649493	0.813185	1.05661	2.99269	1.07789	0.787043	1.51371	1.93494	1.22178	2.02617	1.93911	2.65492	1.29411	1.48178	2.77803	3.66163
1.05	3.07088	2.32483	4.02855	1.24597	3.09794	1.47562	1.26893	0.854501	2.22316	1.05258	0.878334	3.53532	0.987253	0.864174	0.833673	2.09788	0.642854	0.889087	0.998041	2.02853	1.1802	1.39788	1.59739	1.79256	0.977414	1.65148	1.97468	1.49999	1.27401	1.82706	1.97714	3.19675
1.15	3.51598	2.26786	3.64578	1.28646	4.12124	1.77701	1.14763	0.859429	2.14765	0.998215	0.8752	4.10373	1.22627	0.938499	0.802951	1.82804	0.707852	1.00841	1.20537	2.69502	1.223	0.877077	2.76398	1.39003	1.01161	1.15215	1.79248	1.49741	1.25423	1.52498	2.02444	3.18424
1.25	3.48084	2.30354	3.74002	1.31071	3.47831	1.70372	1.13717	1.00161	2.01767	1.25504	0.918482	2.93884	1.24527	0.893821	1.00498	1.89492	0.85004	0.938708	1.1871	2.46785	1.24786	0.947536	1.81688	1.5406	0.936055	1.75548	1.65894	1.67246	1.32236	1.02385	2.30206	3.16308
1.35	3.88393	1.84665	3.30528	1.27359	2.02731	1.8339	1.08707	1.28428	2.11449	1.13966	1.00818	2.72096	1.3174	0.958609	0.886169	2.2941	0.85235	0.919214	1.27367	2.06733	1.24714	0.866193	1.68696	1.56687	1.4271	1.77115	1.78673	1.96108	1.20563	1.98964	2.42165	3.00931
1.45	3.5595	1.81629	4.11603	1.10261	2.19989	1.65905	1.11038	1.23181	1.73856	1.14538	0.894732	2.98916	1.07371	0.998005	0.815487	1.88902	0.788771	1.22162	1.2636	2.61657	1.2155	0.740881	2.18419	1.34277	1.57464	1.51743	1.92081	3.22957	1.29885	2.03647	2.30071	3.0404
1.55	3.45935	2.03718	3.27244	1.24352	2.22721	1.61346	1.16259	1.35316	1.87016	1.1427	0.920124	3.00517	1.08479	0.93718	0.834336	2.03683	0.840918	1.07354	1.2901	2.49217	1.23267	0.91559	1.89331	1.39792	1.27525	1.46473	1.81692	2.19566	1.28018	2.02372	2.78924	3.05269
1.65	3.94982	1.83799	3.7719	1.21285	1.85661	1.53073	1.07455	1.36728	2.16147	1.16249	0.934973	2.83991	1.10578	0.900532	0.887607	1.811	0.831599	0.799202	1.27159	1.96993	0.997589	0.858695	1.87339	1.35473	0.953056	1.28656	1.88538	1.21299	1.40798	1.59542	2.78198	3.03762
1.75	3.23551	1.76819	3.39928	1.18037	2.2298	1.58383	1.14649	1.17004	1.98305	1.18219	1.15912	2.80248	1.11341	1.01937	0.859915	2.12243	0.84714	0.894043	1.14033	3.04895	0.942453	0.587428	2.14882	1.31958	1.00383	1.52562	1.74146	1.32669	1.40798	1.6761	2.4439	3.32274
1.85	3.82695	1.78272	3.57526	1.13628	2.21128	1.48065	1.09564	1.06389	1.9918	0.949974	0.743112	2.83658	1.02627	0.918421	0.848007	2.13805	0.876146	0.693447	1.0069	2.36038	0.980689	0.707775	1.58777	1.08702	0.952006	1.38562	1.70711	1.34979	1.34669	1.69526	2.49458	3.42397
1.95	3.76211	2.0361	3.36684	1.28824	3.1626	1.63737	1.13524	0.951226	2.07693	1.10068	0.963742	2.8045	1.22574	1.10431	0.848395	2.67801	0.752907	0.85403	0.985695	2.65859	1.00731	0.60662	1.92612	1.18885	0.900631	1.45447	1.68777	1.27643	1.52669	1.47803	2.64533	4.37114
2.05	3.77706	1.65535	4.418	1.56937	3.51346	1.6618	1.30589	0.999107	2.67754	1.64902	1.22839	2.13289	1.24213	0.800336	1.07235	2.42047	0.699677	0.701231	1.009	2.30061	1.07294	1.19124	1.59476	1.48954	1.08632	1.21418	1.51451	1.87287	1.64826	1.64192	2.82491	4.79068
2.15	4.10799	1.65396	4.07861	1.46349	3.21173	1.54693	1.36012	0.981153	2.39932	1.46291	1.12759	2.12517	1.12124	0.994094	1.0194	2.3691	0.598477	0.784152	1.07121	2.87598	0.968349	1.05772	1.97161	1.13499	1.05921	2.12461	1.86093	2.51689	1.72445	1.97211	2.91518	4.78156
2.25	5.36694	1.6418	4.22829	1.20224	3.12119	1.62992	1.3647	0.826652	2.66926	1.352	0.806537	2.18098	1.02631	1.46683	0.914523	2.3448	0.643207	0.786767	1.08079	2.65734	0.813886	1.03371	2.37111	1.23883	1.67432	2.08848	2.18733	2.26357	1.58142	2.23672	2.78527	4.83877
2.35	5.68717	1.67377	4.38849	1.35905	2.82448	1.50594	1.34915	1.16817	2.39589	1.28369	0.743201	1.87515	1.01164	1.03572	0.79959	2.07378	0.670913	0.765705	1.08943	3.54904	0.959944	0.706591	2.05256	1.09544	1.98731	1.80895	2.41953	2.21887	1.40951	2.28416	2.89554	4.65317
2.45	6.54493	1.49782	5.41331	1.2839	3.0556	1.50596	1.377	1.27659	2.98912	0.991844	0.727265	2.72391	1.10771	1.05624	0.784394	2.1756	0.664198	0.854369	1.13174	2.65821	1.09469	0.737393	2.53182	1.4382	1.58649	1.93143	2.60121	2.03433	1.4066	1.94788	3.02087	4.44324
2.55	5.6276	1.67874	5.63275	1.15885	2.4335	1.55962	1.32919	1.13203	2.65096	1.16006	0.759336	2.3954	0.935337	0.905271	0.755702	2.02258	0.64918	0.900748	1.24345	2.75379	1.2239	0.801951	2.42804	1.5189	1.45361	1.69504	2.46185	2.22647	1.3494	1.64545	2.98593	4.27879
2.65	5.73131	1.62569	5.65476	1.27996	3.28217	1.51329	1.32865	1.00927	2.79283	1.04892	0.748086	2.29045	0.927635	0.806597	0.799475	2.2274	0.690966	0.818594	0.954917	2.98816	1.12369	0.844165	2.14391	1.83449	1.46805	1.94492	2.00854	2.59083	1.40414	1.49985	2.70179	4.13323
2.75	5.61218	1.59123	6.40484	1.21542	2.72377	1.33602	1.2112	0.997312	2.40342	1.15415	0.761747	2.35403	0.934437	0.958791	0.76184	1.95944	0.647767	0.897044	1.0196	2.61722	1.05781	0.89349	1.82113	2.07909	1.41732	1.81463	2.00015	2.20845	1.37843	1.87372	2.40461	4.02897
2.85	5.33221	1.68972	6.04133	1.22222	2.87148	1.45238	1.19972	0.904595	2.74918	1.33883	0.740488	2.04433	1.06492	0.936139	0.663626	2.27569	0.655574	0.865966	1.05071	2.92715	1.07477	0.852518	1.9409	1.87412	1.3934	2.22659	1.86935	2.50665	1.48513	2.13876	3.40073	4.05817
2.95	5.06826	1.903	6.52488	1.27289	2.65122	1.45001	1.30833	0.840464	2.61792	1.12738	0.751026	2.14027	1.29397	1.1509	0.739529	2.07597	0.649493	0.813185	1.05661	2.99269	1.07789	0.787043	1.51371	1.93494	1.22178	2.02617	1.93911	2.65492	1.29411	1.48178	2.77803	3.66163
3.05	3.07088	2.32483	4.02855	1.24597	3.09794	1.47562	1.26893	0.854501	2.22316	1.05258	0.878334	3.53532	0.987253	0.864174	0.833673	2.09788	0.642854	0.889087	0.998041	2.02853	1.1802	1.39788	1.59739	1.79256	0.977414	1.65148	1.97468	1.49999	1.27401	1.82706	1.97714	3.19675
3.15	3.51598	2.26786	3.64578	1.28646	4.12124	1.77701	1.14763	0.859429	2.14765	0.998215	0.8752	4.10373	1.22627	0.938499	0.802951	1.82804	0.707852	1.00841	1.20537	2.69502	1.223	0.877077	2.76398	1.39003	1.01161	1.15215	1.79248	1.49741	1.25423	1.52498	2.02444	3.18424
3.25	3.48084	2.30354	3.74002	1.31071	3.47831	1.70372	1.13717	1.00161	2.01767	1.25504	0.918482	2.93884	1.24527	0.893821	1.00498	1.89492	0.85004	0.938708	1.1871	2.46785	1.24786	0.947536	1.81688	1.5406	0.936055	1.75548	1.65894	1.67246	1.32236	1.02385	2.30206	3.16308
3.35	3.88393	1.84665	3.30528	1.27359	2.02731	1.8339	1.08707	1.28428	2.11449	1.13966	1.00818	2.72096	1.3174	0.958609	0.886169	2.2941	0.85235	0.919214	1.27367	2.06733	1.24714	0.866193	1.68696	1.56687	1.4271	1.77115	1.78673	1.96108	1.20563	1.98964	2.42165	3.00931
3.45	3.5595	1.81629	4.11603	1.10261	2.19989	1.65905	1.11038	1.23181	1.73856	1.14538	0.894732	2.98916	1.07371	0.998005	0.815487	1.88902	0.788771	1.22162	1.2636	2.61657	1.2155	0.740881	2.18419	1.34277	1.57464	1.51743	1.92081	3.22957	1.29885	2.03647	2.30071	3.0404
3.55	3.45935	2.03718	3.27244	1.24352	2.22721	1.61346	1.16259	1.35316	1.87016	1.1427	0.920124	3.00517	1.08479	0.93718	0.834336	2.03683	0.840918	1.07354	1.2901	2.49217	1.23267	0.91559	1.89331	1.39792	1.27525	1.46473	1.81692	2.19566	1.28018	2.02372	2.78924	3.05269
3.65	3.94982	1.83799	3.7719	1.21285	1.85661	1.53073	1.07455	1.36728	2.16147	1.16249	0.934973	2.83991	1.10578	0.900532	0.887607	1.811	0.831599	0.799202	1.27159	1.96993	0.997589	0.858695	1.87339	1.35473	0.953056	1.28656	1.88538	1.21299	1.40798	1.59542	2.78198	3.03762
3.75	3.23551	1.76819	3.39928	1.18037	2.2298	1.58383	1.14649	1.17004	1.98305	1.18219	1.15912	2.80248	1.11341	1.01937	0.859915	2.12243	0.84714	0.894043	1.14033	3.04895	0.942453	0.587428	2.14882	1.31958	1.00383	1.52562	1.74146	1.32669	1.40798	1.6761	2.4439	3.32274
3.85	3.82695	1.78272	3.57526	1.13628	2.21128	1.48065	1.09564	1.06389	1.9918	0.949974	0.743112	2.83658	1.02627	0.918421	0.848007	2.13805	0.876146	0.693447	1.0069	2.36038	0.980689	0.707775	1.58777	1.08702	0.952006	1.38562	1.70711	1.34979	1.34669	1.69526	2.49458	3.42397
3.95	3.76211	2.0361	3.36684	1.28824	3.1626	1.63737	1.13524	0.951226	2.07693	1.10068	0.963742	2.8045	1.22574	1.10431	0.848395	2.67801	0.752907	0.85403	0.985695	2.65859	1.00731	0.60662	1.92612	1.18885	0.900631	1.45447	1.68777	1.27643	1.52669	1.47803	2.64533	4.37114

## Sheet: DG State Vm_fast std
0	523502	524002	523501	523701	523801	524203	523301	524102	524001	523302	524003	524202	523601	523401	524201	659201	523402	524101	659202	523901	523702	523602
0.05	3.06019	3.44624	2.75194	3.33663	3.56165	2.10204	3.58188	3.29416	2.86325	4.18229	3.3812	2.40811	2.65479	2.538	2.74701	2.49631	2.62542	2.43146	2.87074	3.07926	2.90445	2.59107
0.15	2.87583	3.0454	2.54067	3.2203	3.41552	2.01398	3.35056	3.47948	2.67743	4.05994	3.09652	2.36665	2.50885	2.40677	2.71174	2.57282	2.60799	2.47161	2.89451	3.04151	2.84177	2.58558
0.25	2.8571	3.32007	2.52934	3.22404	3.24753	1.92949	3.41023	3.44478	2.62303	3.56081	2.8797	2.39947	2.57424	2.55125	2.69272	2.47908	2.61424	2.42502	2.78599	2.71201	2.88426	2.57438
0.35	2.77742	3.23317	2.54035	3.15122	3.43571	1.97361	3.48539	3.38038	2.55116	3.73311	2.90232	2.42597	2.70335	2.38006	2.63982	2.63234	2.58241	2.41515	2.90297	2.83944	2.77495	2.65077
0.45	2.95044	3.51759	2.42802	3.16872	3.41771	1.9433	3.29035	3.41416	2.51194	3.90968	2.95116	2.41765	2.66477	2.46981	2.74794	2.44325	2.57603	2.42522	2.98268	2.6971	2.85574	2.50869
0.55	3.04682	3.37116	2.49512	3.39463	3.66802	1.94893	3.4462	3.63048	2.59071	3.72128	2.86521	2.21078	2.64163	2.55823	2.6076	2.57246	2.52626	2.48726	2.99696	3.22975	2.97964	2.30789
0.65	2.96051	3.2888	2.60731	3.35313	3.66395	1.98555	3.30866	3.40687	2.78448	3.78637	2.89289	2.39405	2.78438	2.30018	2.6526	2.7966	2.43876	2.51936	3.05654	3.07759	2.9067	2.31504
0.75	2.9385	2.97532	2.51831	3.69096	3.35604	2.05473	3.40703	3.55248	2.63719	3.35091	3.12132	2.3563	2.77241	2.28521	2.83716	2.766	2.43219	2.55823	2.99025	2.81475	2.92555	2.19726
0.85	3.121	3.01101	2.5411	3.8906	3.67204	2.1157	3.36488	3.45113	2.78253	3.77169	3.05268	2.47125	2.8264	2.59692	2.8681	2.76347	2.4612	2.58391	3.12258	3.19952	3.00893	2.1516
0.95	3.52195	3.63341	2.59352	4.22924	3.84334	2.49107	3.81146	3.83139	2.96141	4.52026	3.05374	2.62462	2.96821	2.72645	2.87322	3.07148	2.71265	2.71275	3.06883	3.02817	2.97143	2.45274
1.05	3.97043	3.93065	3.22301	4.20069	3.88311	2.70823	4.15551	4.02562	3.02479	4.08118	3.14732	2.93513	3.2579	3.0103	3.40249	3.33233	2.67273	2.79346	3.41527	3.74004	3.06503	2.53159
1.15	3.95042	4.34556	3.02952	4.09121	4.0091	2.73147	4.0858	4.12205	3.22886	4.20374	2.97947	2.85209	3.21329	3.01613	3.1904	3.14985	2.53966	2.74132	3.38438	3.80754	3.15629	2.55726
1.25	4.08326	4.25257	3.2117	4.13865	3.84254	2.74344	4.14479	4.21451	3.12704	3.93304	2.91474	2.91179	3.11241	3.00585	3.45935	3.22857	2.75648	2.81621	3.3052	3.55563	3.13861	2.58811
1.35	3.94297	4.10146	3.09718	4.16144	3.6234	2.70899	4.0657	4.08083	3.076	4.23197	2.91084	2.70013	3.0724	2.87349	3.2731	3.26527	2.62505	2.80564	3.35462	3.58738	3.24618	2.74842
1.45	4.02517	4.14748	3.31393	4.12772	3.72241	2.6768	3.92819	4.26389	3.00566	3.78353	2.9109	2.91312	3.13446	2.93063	3.20134	2.99731	2.61196	2.77272	3.29568	3.848	3.1496	2.63867
1.55	4.23565	4.2926	3.20698	4.01846	3.64961	2.62233	3.97902	4.25864	3.0692	3.67162	2.87622	2.90349	3.08999	2.95212	3.42228	3.39201	2.28114	2.81607	3.29699	3.73184	3.15193	2.5527
1.65	4.12771	4.07605	3.58054	4.01883	3.74204	2.66713	3.83966	4.2819	3.26252	3.94425	2.8798	2.81773	3.02493	2.96705	3.19254	3.0359	2.5791	2.73119	3.30466	3.46318	3.22307	2.55142
1.75	4.25643	4.28104	3.36101	4.07417	3.63701	2.62774	3.79998	4.16859	3.10087	4.00496	2.90042	2.77976	3.09009	2.68333	3.33751	3.02039	2.36065	2.77294	3.31151	3.42803	3.04368	2.64887
1.85	4.23276	4.05529	3.24624	3.88252	3.775	2.51056	3.64682	3.99343	2.96225	4.11192	2.93002	2.88134	3.02918	2.88715	3.24331	3.10511	2.43213	2.73424	3.36942	4.02267	2.94721	2.67768
1.95	3.77858	4.1208	3.18688	3.83509	3.70886	2.37258	3.50718	3.82785	3.10082	3.76991	3.27683	2.49939	2.9079	2.83677	3.12319	2.86144	2.50974	2.64184	3.21286	3.97449	3.08	2.57473
2.05	3.06019	3.44624	2.75194	3.33663	3.56165	2.10204	3.58188	3.29416	2.86325	4.18229	3.3812	2.40811	2.65479	2.538	2.74701	2.49631	2.62542	2.43146	2.87074	3.07926	2.90445	2.59107
2.15	2.87583	3.0454	2.54067	3.2203	3.41552	2.01398	3.35056	3.47948	2.67743	4.05994	3.09652	2.36665	2.50885	2.40677	2.71174	2.57282	2.60799	2.47161	2.89451	3.04151	2.84177	2.58558
2.25	2.8571	3.32007	2.52934	3.22404	3.24753	1.92949	3.41023	3.44478	2.62303	3.56081	2.8797	2.39947	2.57424	2.55125	2.69272	2.47908	2.61424	2.42502	2.78599	2.71201	2.88426	2.57438
2.35	2.77742	3.23317	2.54035	3.15122	3.43571	1.97361	3.48539	3.38038	2.55116	3.73311	2.90232	2.42597	2.70335	2.38006	2.63982	2.63234	2.58241	2.41515	2.90297	2.83944	2.77495	2.65077
2.45	2.95044	3.51759	2.42802	3.16872	3.41771	1.9433	3.29035	3.41416	2.51194	3.90968	2.95116	2.41765	2.66477	2.46981	2.74794	2.44325	2.57603	2.42522	2.98268	2.6971	2.85574	2.50869
2.55	3.04682	3.37116	2.49512	3.39463	3.66802	1.94893	3.4462	3.63048	2.59071	3.72128	2.86521	2.21078	2.64163	2.55823	2.6076	2.57246	2.52626	2.48726	2.99696	3.22975	2.97964	2.30789
2.65	2.96051	3.2888	2.60731	3.35313	3.66395	1.98555	3.30866	3.40687	2.78448	3.78637	2.89289	2.39405	2.78438	2.30018	2.6526	2.7966	2.43876	2.51936	3.05654	3.07759	2.9067	2.31504
2.75	2.9385	2.97532	2.51831	3.69096	3.35604	2.05473	3.40703	3.55248	2.63719	3.35091	3.12132	2.3563	2.77241	2.28521	2.83716	2.766	2.43219	2.55823	2.99025	2.81475	2.92555	2.19726
2.85	3.121	3.01101	2.5411	3.8906	3.67204	2.1157	3.36488	3.45113	2.78253	3.77169	3.05268	2.47125	2.8264	2.59692	2.8681	2.76347	2.4612	2.58391	3.12258	3.19952	3.00893	2.1516
2.95	3.52195	3.63341	2.59352	4.22924	3.84334	2.49107	3.81146	3.83139	2.96141	4.52026	3.05374	2.62462	2.96821	2.72645	2.87322	3.07148	2.71265	2.71275	3.06883	3.02817	2.97143	2.45274
3.05	3.97043	3.93065	3.22301	4.20069	3.88311	2.70823	4.15551	4.02562	3.02479	4.08118	3.14732	2.93513	3.2579	3.0103	3.40249	3.33233	2.67273	2.79346	3.41527	3.74004	3.06503	2.53159
3.15	3.95042	4.34556	3.02952	4.09121	4.0091	2.73147	4.0858	4.12205	3.22886	4.20374	2.97947	2.85209	3.21329	3.01613	3.1904	3.14985	2.53966	2.74132	3.38438	3.80754	3.15629	2.55726
3.25	4.08326	4.25257	3.2117	4.13865	3.84254	2.74344	4.14479	4.21451	3.12704	3.93304	2.91474	2.91179	3.11241	3.00585	3.45935	3.22857	2.75648	2.81621	3.3052	3.55563	3.13861	2.58811
3.35	3.94297	4.10146	3.09718	4.16144	3.6234	2.70899	4.0657	4.08083	3.076	4.23197	2.91084	2.70013	3.0724	2.87349	3.2731	3.26527	2.62505	2.80564	3.35462	3.58738	3.24618	2.74842
3.45	4.02517	4.14748	3.31393	4.12772	3.72241	2.6768	3.92819	4.26389	3.00566	3.78353	2.9109	2.91312	3.13446	2.93063	3.20134	2.99731	2.61196	2.77272	3.29568	3.848	3.1496	2.63867
3.55	4.23565	4.2926	3.20698	4.01846	3.64961	2.62233	3.97902	4.25864	3.0692	3.67162	2.87622	2.90349	3.08999	2.95212	3.42228	3.39201	2.28114	2.81607	3.29699	3.73184	3.15193	2.5527
3.65	4.12771	4.07605	3.58054	4.01883	3.74204	2.66713	3.83966	4.2819	3.26252	3.94425	2.8798	2.81773	3.02493	2.96705	3.19254	3.0359	2.5791	2.73119	3.30466	3.46318	3.22307	2.55142
3.75	4.25643	4.28104	3.36101	4.07417	3.63701	2.62774	3.79998	4.16859	3.10087	4.00496	2.90042	2.77976	3.09009	2.68333	3.33751	3.02039	2.36065	2.77294	3.31151	3.42803	3.04368	2.64887
3.85	4.23276	4.05529	3.24624	3.88252	3.775	2.51056	3.64682	3.99343	2.96225	4.11192	2.93002	2.88134	3.02918	2.88715	3.24331	3.10511	2.43213	2.73424	3.36942	4.02267	2.94721	2.67768
3.95	3.77858	4.1208	3.18688	3.83509	3.70886	2.37258	3.50718	3.82785	3.10082	3.76991	3.27683	2.49939	2.9079	2.83677	3.12319	2.86144	2.50974	2.64184	3.21286	3.97449	3.08	2.57473

## Sheet: CA3 State Vm_fast std
0	525301	521502	525101	520901	525001	659105	719301	525403	521303	521602	580501	525404	580201	521304	580601	719002	520701	526202	719303	521401	719001	719103	521101	659101	521501	521102	719201	521302	525003	521202	520702	719202
0.05	2.09306	1.9316	2.00792	1.60067	1.55987	1.81626	2.04185	2.12342	2.20868	1.24782	1.95649	1.63602	2.67703	2.44705	1.62973	2.5768	2.15328	1.83012	1.85851	2.08169	1.6459	1.8333	2.50499	1.6551	1.70637	2.70867	2.30842	2.82879	1.93334	2.74125	2.68502	4.40718
0.15	1.68238	2.1563	1.58677	1.55134	1.61303	1.71027	1.58293	1.77679	2.14368	1.41514	2.03626	1.58129	2.40012	2.27503	1.55357	1.95138	2.10172	1.75569	1.83558	2.15	1.35187	2.01785	2.41874	1.6101	1.59524	2.52404	2.35174	2.38836	1.76942	2.87596	2.71519	4.22429
0.25	1.48268	1.93209	1.67179	1.94962	1.61786	1.61996	1.31296	1.57648	1.98954	1.36508	1.9671	1.85721	2.36054	2.31248	1.52854	1.96466	1.9974	1.82652	1.87282	2.13677	1.53051	2.05731	2.64577	1.5981	1.92166	2.51844	2.20469	2.53193	1.84516	2.8239	2.61064	4.0644
0.35	1.59665	2.07264	1.66978	1.52178	1.59249	1.55049	1.34169	1.81124	2.05929	1.47416	1.82361	1.65738	2.32633	2.31557	1.49332	2.04034	2.04286	1.70957	1.95525	2.04071	1.58026	1.88555	2.71061	1.51592	1.90573	2.45989	2.23022	2.30988	1.90538	2.90297	2.83805	4.14406
0.45	1.60346	2.05539	1.62268	1.43242	1.72106	1.56848	1.55672	1.62805	2.04424	1.64958	1.99549	1.56356	2.29289	2.28356	1.46019	1.94376	2.03446	1.80802	2.47366	2.05877	1.27774	1.98374	2.59566	1.53197	1.82487	2.3049	2.25262	2.33737	1.96757	2.87897	2.64329	4.13699
0.55	1.6045	2.0093	1.58694	1.48862	1.72723	1.75905	1.49861	1.73784	2.13263	1.59109	2.03883	1.73671	2.62395	2.27771	1.51902	2.06677	1.96338	1.75109	2.15017	2.16953	1.42334	2.03739	2.82314	1.67871	1.6838	2.40329	2.31315	2.41794	2.02141	3.08386	2.69118	3.99987
0.65	1.63809	2.04723	1.64145	1.45216	1.75821	1.65411	1.62392	1.71166	2.14042	1.66369	1.9357	1.72376	2.51168	2.26239	1.52807	2.13585	1.98348	1.66299	1.7602	2.04206	1.36446	1.96117	2.8206	1.74905	1.61581	2.45764	2.2878	2.38997	1.89396	3.01075	2.64698	4.02186
0.75	1.68886	2.18264	1.77346	1.32163	1.80433	1.69527	1.55857	1.9035	2.22689	1.28544	2.20975	1.65545	2.49032	2.24607	1.46913	2.26494	2.06803	1.67506	1.73018	2.1216	1.32808	2.06675	2.52623	1.85243	1.564	2.39441	2.31495	2.47884	1.92208	3.07958	2.80928	3.95532
0.85	1.68579	2.28539	1.80582	1.64223	1.88897	1.76979	1.52997	1.72301	2.39082	1.26515	2.02885	1.8696	2.66904	2.18438	1.44367	2.2832	2.11146	1.79368	1.92808	2.02494	1.27003	2.25066	2.4168	1.56905	1.57562	2.42396	2.18541	2.23718	1.93631	2.8202	2.66534	3.86413
0.95	2.02133	2.26229	1.81794	1.77809	2.12207	1.86271	1.58468	1.94548	2.43212	1.38964	2.07505	2.00536	2.73812	2.1991	1.55194	2.19098	2.09313	1.82542	2.38289	2.18487	1.17403	2.11051	2.37625	1.64508	1.44708	2.33863	2.14161	2.45947	2.10086	2.93736	2.78728	3.23801
1.05	2.17667	2.2419	1.96298	1.82695	2.1625	2.02359	1.93675	2.03199	2.57805	2.12653	2.0674	1.91492	2.7313	2.13922	1.63365	2.11216	2.22373	2.01214	2.41216	1.95698	1.49753	2.28678	2.58944	1.69598	1.59598	2.47969	2.13996	2.44712	2.16823	2.68612	2.24631	3.00074
1.15	2.22097	2.51593	2.08787	1.9151	2.1538	2.06469	2.0584	2.32123	2.66925	2.07858	2.17591	1.98376	2.51982	2.28807	1.91379	2.22408	2.1158	1.88916	2.4448	2.28026	1.62269	2.13827	1.87248	1.8075	1.88593	2.34394	2.23164	2.47625	2.21398	2.3746	2.48175	2.80364
1.25	2.12306	2.35613	2.14878	1.7777	2.47395	2.09991	1.76299	2.20321	2.62407	1.77069	2.28914	1.86735	2.44163	2.34621	2.07244	2.0832	2.13127	1.7413	2.35433	2.61634	1.59812	2.28241	2.32989	1.75309	1.89353	2.58695	2.2667	2.39183	2.1076	2.30703	2.89347	3.03017
1.35	2.0805	2.39224	1.98099	2.00743	2.38322	2.08626	1.73815	2.04542	2.59949	1.68718	2.2639	1.82476	2.42828	2.27614	1.96098	2.22751	2.1657	1.84022	2.1779	2.04066	1.63135	1.85635	2.24686	1.7731	1.83255	2.64468	2.17222	2.47461	2.1531	2.3754	2.63714	3.20764
1.45	2.14573	2.47598	2.18809	1.89773	2.33162	2.12709	1.84137	2.23468	2.7251	1.90473	2.17484	1.85467	2.56107	2.2129	1.98831	2.16364	2.09991	1.87934	2.26759	1.75069	1.71819	2.14277	2.37594	1.72898	1.80628	2.49853	2.20113	2.25954	2.21453	2.3358	2.32749	3.2074
1.55	2.15147	2.3038	2.10844	1.96216	2.24606	2.10195	1.68298	2.23844	2.58429	1.98118	2.48053	1.88502	2.5339	2.25926	1.88121	2.01428	2.13453	2.03944	1.97098	1.72767	1.87017	2.23552	2.16253	1.88339	1.82562	2.66167	2.27769	2.2007	2.12208	2.37775	2.53724	3.17084
1.65	2.1468	2.48857	2.12757	1.8632	2.237	2.11088	1.61744	2.27453	2.57582	2.08519	2.11788	1.77664	2.59104	2.34131	1.98892	1.96087	2.16583	1.94121	2.08206	2.08913	1.6169	2.26681	2.04533	1.89972	1.84724	2.69395	2.28606	2.23334	2.19531	2.33756	2.43287	3.16223
1.75	2.20093	2.40929	2.11723	1.81659	2.2069	2.07679	1.6333	2.36658	2.67238	1.73083	2.34396	1.72653	2.56638	2.25494	2.01832	2.04809	2.20326	1.93989	2.1446	2.02053	1.85687	2.20308	2.54698	1.82354	1.90166	2.56897	2.20855	2.19623	2.08574	2.07751	2.31534	3.35021
1.85	2.24847	2.32358	2.23259	2.05565	2.14428	2.15118	1.44112	2.04041	2.58708	1.73038	2.1157	1.82803	2.61996	2.28907	2.04198	2.22154	2.16998	1.84631	2.34241	2.3363	1.86365	2.48222	2.45225	1.85102	1.65814	2.51067	2.3666	2.24503	2.14499	2.18298	2.10035	3.54003
1.95	2.24756	2.21414	2.23292	2.0577	1.76522	2.06984	1.66473	2.30609	2.68621	1.7225	2.24072	1.78452	2.77296	2.42468	1.90233	2.34342	2.24795	1.95718	2.54466	2.22108	1.68046	2.02768	3.10685	1.79685	1.87379	2.84217	2.46013	2.52593	2.20912	2.08748	2.6267	4.1072
2.05	2.09306	1.9316	2.00792	1.60067	1.55987	1.81626	2.04185	2.12342	2.20868	1.24782	1.95649	1.63602	2.67703	2.44705	1.62973	2.5768	2.15328	1.83012	1.85851	2.08169	1.6459	1.8333	2.50499	1.6551	1.70637	2.70867	2.30842	2.82879	1.93334	2.74125	2.68502	4.40718
2.15	1.68238	2.1563	1.58677	1.55134	1.61303	1.71027	1.58293	1.77679	2.14368	1.41514	2.03626	1.58129	2.40012	2.27503	1.55357	1.95138	2.10172	1.75569	1.83558	2.15	1.35187	2.01785	2.41874	1.6101	1.59524	2.52404	2.35174	2.38836	1.76942	2.87596	2.71519	4.22429
2.25	1.48268	1.93209	1.67179	1.94962	1.61786	1.61996	1.31296	1.57648	1.98954	1.36508	1.9671	1.85721	2.36054	2.31248	1.52854	1.96466	1.9974	1.82652	1.87282	2.13677	1.53051	2.05731	2.64577	1.5981	1.92166	2.51844	2.20469	2.53193	1.84516	2.8239	2.61064	4.0644
2.35	1.59665	2.07264	1.66978	1.52178	1.59249	1.55049	1.34169	1.81124	2.05929	1.47416	1.82361	1.65738	2.32633	2.31557	1.49332	2.04034	2.04286	1.70957	1.95525	2.04071	1.58026	1.88555	2.71061	1.51592	1.90573	2.45989	2.23022	2.30988	1.90538	2.90297	2.83805	4.14406
2.45	1.60346	2.05539	1.62268	1.43242	1.72106	1.56848	1.55672	1.62805	2.04424	1.64958	1.99549	1.56356	2.29289	2.28356	1.46019	1.94376	2.03446	1.80802	2.47366	2.05877	1.27774	1.98374	2.59566	1.53197	1.82487	2.3049	2.25262	2.33737	1.96757	2.87897	2.64329	4.13699
2.55	1.6045	2.0093	1.58694	1.48862	1.72723	1.75905	1.49861	1.73784	2.13263	1.59109	2.03883	1.73671	2.62395	2.27771	1.51902	2.06677	1.96338	1.75109	2.15017	2.16953	1.42334	2.03739	2.82314	1.67871	1.6838	2.40329	2.31315	2.41794	2.02141	3.08386	2.69118	3.99987
2.65	1.63809	2.04723	1.64145	1.45216	1.75821	1.65411	1.62392	1.71166	2.14042	1.66369	1.9357	1.72376	2.51168	2.26239	1.52807	2.13585	1.98348	1.66299	1.7602	2.04206	1.36446	1.96117	2.8206	1.74905	1.61581	2.45764	2.2878	2.38997	1.89396	3.01075	2.64698	4.02186
2.75	1.68886	2.18264	1.77346	1.32163	1.80433	1.69527	1.55857	1.9035	2.22689	1.28544	2.20975	1.65545	2.49032	2.24607	1.46913	2.26494	2.06803	1.67506	1.73018	2.1216	1.32808	2.06675	2.52623	1.85243	1.564	2.39441	2.31495	2.47884	1.92208	3.07958	2.80928	3.95532
2.85	1.68579	2.28539	1.80582	1.64223	1.88897	1.76979	1.52997	1.72301	2.39082	1.26515	2.02885	1.8696	2.66904	2.18438	1.44367	2.2832	2.11146	1.79368	1.92808	2.02494	1.27003	2.25066	2.4168	1.56905	1.57562	2.42396	2.18541	2.23718	1.93631	2.8202	2.66534	3.86413
2.95	2.02133	2.26229	1.81794	1.77809	2.12207	1.86271	1.58468	1.94548	2.43212	1.38964	2.07505	2.00536	2.73812	2.1991	1.55194	2.19098	2.09313	1.82542	2.38289	2.18487	1.17403	2.11051	2.37625	1.64508	1.44708	2.33863	2.14161	2.45947	2.10086	2.93736	2.78728	3.23801
3.05	2.17667	2.2419	1.96298	1.82695	2.1625	2.02359	1.93675	2.03199	2.57805	2.12653	2.0674	1.91492	2.7313	2.13922	1.63365	2.11216	2.22373	2.01214	2.41216	1.95698	1.49753	2.28678	2.58944	1.69598	1.59598	2.47969	2.13996	2.44712	2.16823	2.68612	2.24631	3.00074
3.15	2.22097	2.51593	2.08787	1.9151	2.1538	2.06469	2.0584	2.32123	2.66925	2.07858	2.17591	1.98376	2.51982	2.28807	1.91379	2.22408	2.1158	1.88916	2.4448	2.28026	1.62269	2.13827	1.87248	1.8075	1.88593	2.34394	2.23164	2.47625	2.21398	2.3746	2.48175	2.80364
3.25	2.12306	2.35613	2.14878	1.7777	2.47395	2.09991	1.76299	2.20321	2.62407	1.77069	2.28914	1.86735	2.44163	2.34621	2.07244	2.0832	2.13127	1.7413	2.35433	2.61634	1.59812	2.28241	2.32989	1.75309	1.89353	2.58695	2.2667	2.39183	2.1076	2.30703	2.89347	3.03017
3.35	2.0805	2.39224	1.98099	2.00743	2.38322	2.08626	1.73815	2.04542	2.59949	1.68718	2.2639	1.82476	2.42828	2.27614	1.96098	2.22751	2.1657	1.84022	2.1779	2.04066	1.63135	1.85635	2.24686	1.7731	1.83255	2.64468	2.17222	2.47461	2.1531	2.3754	2.63714	3.20764
3.45	2.14573	2.47598	2.18809	1.89773	2.33162	2.12709	1.84137	2.23468	2.7251	1.90473	2.17484	1.85467	2.56107	2.2129	1.98831	2.16364	2.09991	1.87934	2.26759	1.75069	1.71819	2.14277	2.37594	1.72898	1.80628	2.49853	2.20113	2.25954	2.21453	2.3358	2.32749	3.2074
3.55	2.15147	2.3038	2.10844	1.96216	2.24606	2.10195	1.68298	2.23844	2.58429	1.98118	2.48053	1.88502	2.5339	2.25926	1.88121	2.01428	2.13453	2.03944	1.97098	1.72767	1.87017	2.23552	2.16253	1.88339	1.82562	2.66167	2.27769	2.2007	2.12208	2.37775	2.53724	3.17084
3.65	2.1468	2.48857	2.12757	1.8632	2.237	2.11088	1.61744	2.27453	2.57582	2.08519	2.11788	1.77664	2.59104	2.34131	1.98892	1.96087	2.16583	1.94121	2.08206	2.08913	1.6169	2.26681	2.04533	1.89972	1.84724	2.69395	2.28606	2.23334	2.19531	2.33756	2.43287	3.16223
3.75	2.20093	2.40929	2.11723	1.81659	2.2069	2.07679	1.6333	2.36658	2.67238	1.73083	2.34396	1.72653	2.56638	2.25494	2.01832	2.04809	2.20326	1.93989	2.1446	2.02053	1.85687	2.20308	2.54698	1.82354	1.90166	2.56897	2.20855	2.19623	2.08574	2.07751	2.31534	3.35021
3.85	2.24847	2.32358	2.23259	2.05565	2.14428	2.15118	1.44112	2.04041	2.58708	1.73038	2.1157	1.82803	2.61996	2.28907	2.04198	2.22154	2.16998	1.84631	2.34241	2.3363	1.86365	2.48222	2.45225	1.85102	1.65814	2.51067	2.3666	2.24503	2.14499	2.18298	2.10035	3.54003
3.95	2.24756	2.21414	2.23292	2.0577	1.76522	2.06984	1.66473	2.30609	2.68621	1.7225	2.24072	1.78452	2.77296	2.42468	1.90233	2.34342	2.24795	1.95718	2.54466	2.22108	1.68046	2.02768	3.10685	1.79685	1.87379	2.84217	2.46013	2.52593	2.20912	2.08748	2.6267	4.1072

## Sheet: CA1 State Vm_fast std
0	523101	524302	524303	522902	522402	523201	522503	524401	522802	522703	522701	524304	522202	522403	522002	522702	523002	522001	521701	524301	522101	522401	523001	522201	522502	522501	659203	522203	522301	522801	524305	521801
0.05	1.82197	1.54817	1.91388	1.86255	2.20668	1.34293	1.30979	1.31807	1.64854	1.27088	1.46036	1.54924	1.72316	1.48618	1.89216	2.14593	1.11844	1.01182	1.20599	2.57725	1.28158	1.50681	1.9324	2.13788	1.4999	1.72112	1.91502	3.31544	2.95087	2.37486	3.45437	7.63851
0.15	1.60054	1.31682	1.61548	1.58703	2.07404	1.095	1.15316	1.23869	1.52853	1.00348	1.05693	1.39679	1.2931	1.059	1.22804	1.682	0.974874	0.805124	1.14015	2.40284	1.38956	1.09927	2.09076	1.69899	1.47718	1.9511	1.76655	2.68923	2.73696	2.29723	2.94919	6.57031
0.25	1.76388	1.29624	1.57557	1.46501	1.8128	1.02349	1.10564	1.15809	1.33743	1.21481	0.979322	1.45365	1.1998	1.26381	1.11183	1.47908	0.919752	0.71922	1.11354	2.53017	1.22647	1.32133	1.78989	2.05353	1.7067	1.72207	1.72258	2.20617	2.61349	2.39913	2.72568	5.97958
0.35	1.80482	1.49385	1.41398	1.69602	1.76075	0.995132	1.13684	1.17056	1.38656	1.38391	0.901547	1.42862	1.21529	1.12074	1.07065	1.60061	0.979818	0.773151	1.19354	2.45304	1.24744	0.827263	2.06442	1.67142	1.58378	1.8794	1.63697	2.3761	2.6687	2.52538	2.93974	5.88652
0.45	1.82145	1.30976	1.66675	1.41869	1.89508	0.982531	1.19581	1.31671	1.38169	1.2273	0.949624	1.48698	1.29608	1.13932	1.11107	1.65097	1.01348	0.751143	1.11666	2.09511	1.21329	1.0842	2.28651	1.75034	1.67273	2.156	2.28806	2.4892	2.58379	2.23369	2.79281	5.62627
0.55	1.77515	1.27935	1.42666	1.57323	1.99837	1.05039	1.1972	1.22572	1.51349	1.48429	0.985255	1.71115	1.1226	1.09936	1.06337	1.61729	0.986845	0.681683	1.09918	2.12381	1.24381	0.978948	1.88364	1.90992	1.52093	2.00966	1.94304	2.29511	2.23759	2.01798	2.57204	5.69945
0.65	1.88014	1.38992	1.81381	1.70475	1.84833	1.07087	1.20266	1.23947	1.66584	1.17973	1.00091	1.65375	1.13451	1.13123	1.09085	1.77845	1.05108	0.733413	1.15247	2.10004	1.27102	1.16866	2.54068	1.95887	1.54202	2.13225	1.86016	2.28324	2.19877	2.29683	2.69207	5.72049
0.75	1.64308	1.28335	1.5962	1.69247	2.08643	1.09347	1.27177	1.25268	1.56487	1.34406	0.991909	1.73074	1.14032	1.10778	1.12306	1.55317	1.0533	0.702126	1.128	1.86162	1.29081	1.38956	2.16168	1.69473	1.31314	2.4114	1.94544	2.3723	2.10061	2.5915	2.36942	5.17658
0.85	2.0382	1.51353	1.78755	1.84371	2.15828	1.16627	1.50101	1.28396	1.74038	1.75554	0.998074	1.78499	1.37313	1.28456	1.18012	1.76569	1.00668	0.709489	1.17567	1.97268	1.21343	1.4951	2.42202	2.5577	1.57496	2.25607	1.88856	2.26825	2.18965	2.38582	2.27422	4.98246
0.95	2.2034	1.56712	2.13348	2.18962	2.44336	1.41045	2.01573	1.63964	1.94868	2.11678	1.25475	1.96726	2.15369	1.73988	1.16717	1.81117	1.18281	0.860509	1.35578	2.14391	1.63095	1.48742	2.7278	2.28349	1.67402	2.48736	2.20939	2.18848	2.53026	3.01341	2.14764	4.8801
1.05	2.72381	2.10108	2.46128	2.31396	2.84833	1.87401	2.39445	2.00525	2.3239	2.10614	1.90897	2.26642	2.3806	1.86653	1.68204	2.29657	1.46514	1.27191	1.68024	2.05637	1.78061	1.90847	2.23874	2.50717	2.07978	2.55911	2.4134	2.57299	2.50488	2.58966	2.27848	4.30868
1.15	2.86046	2.26877	2.40455	2.27217	3.03326	2.10654	2.347	2.23603	2.48432	2.63345	1.90399	2.18449	2.54034	1.7946	1.80245	2.25299	1.74662	1.32239	1.88196	2.31897	2.00936	1.8409	2.16604	2.62546	2.09083	2.5526	2.3692	2.47951	2.51767	2.42052	2.12941	3.97949
1.25	2.75118	2.33076	2.47758	2.45747	2.89225	2.16107	2.2552	2.40197	2.33574	2.60987	1.82942	2.31794	2.45125	1.99911	1.77443	2.20451	1.87084	1.35655	1.78287	2.28958	1.99669	1.85458	2.52371	2.24566	2.22142	2.38734	2.2973	2.44522	2.43367	2.82109	2.28546	3.92113
1.35	3.07615	2.10567	2.47672	2.36603	2.93321	2.20632	2.42915	2.451	2.35653	2.95523	2.13113	2.27666	2.36458	2.1103	1.89376	2.26855	1.77868	1.5015	1.74855	2.29157	1.85094	1.84028	2.52125	2.0802	2.04102	2.14511	2.19164	2.51372	2.65592	2.73064	2.37418	4.11397
1.45	3.26858	2.08281	2.44215	2.44108	2.87882	2.02595	2.46065	2.21303	2.49798	2.41988	1.89743	2.26101	2.55373	2.04644	1.87592	2.38875	1.78846	1.65693	1.70463	2.45817	1.98554	1.85946	2.10496	2.48227	2.22078	2.78229	2.054	2.35015	2.49657	2.98714	2.30761	4.18734
1.55	2.76424	2.32665	2.502	2.33469	3.12376	1.87034	2.38794	2.48818	2.57521	2.45848	2.18841	2.53491	2.30017	1.8845	1.82868	2.25131	1.61532	1.54197	1.73436	2.12569	1.96232	2.12257	2.20475	2.10371	2.3124	2.32359	2.19038	2.3343	2.35082	2.28417	2.17195	3.78726
1.65	3.1841	2.06393	2.24558	2.52436	2.85328	1.97617	2.30556	2.48663	2.33143	2.74634	2.01412	2.37077	2.67053	2.07923	1.88074	2.25057	1.80463	1.64157	1.86934	2.57762	2.07732	1.82109	2.24474	2.72753	2.34283	2.3197	2.43059	2.53888	2.49074	2.39263	2.2096	3.82644
1.75	2.96925	2.41127	2.41178	2.43525	2.89349	1.92128	2.2109	2.66577	2.35684	3.13316	1.90661	2.23039	2.36198	2.0131	1.95378	2.26732	1.78228	1.64291	1.79392	2.42766	1.71333	2.40826	2.32783	2.22764	2.18406	2.48828	2.27629	2.47643	2.60475	2.91011	2.1968	4.12699
1.85	2.91377	2.36377	2.70054	2.28732	2.84058	1.96743	2.24485	2.09289	2.27207	3.04961	2.0202	2.4161	2.0781	2.0847	1.85428	2.47216	1.96976	1.73789	1.60886	2.61872	1.71442	2.09356	2.50522	2.65875	2.35044	2.30702	2.32932	2.36797	2.6659	2.5554	2.39285	4.41951
1.95	2.62957	2.46099	2.48041	2.23645	3.26936	1.86938	2.37378	1.72944	2.31613	2.68541	2.02305	2.37123	2.08268	1.89842	1.85599	2.86329	1.68239	1.60394	1.66785	2.80657	1.61447	1.76985	2.20583	2.28887	2.17233	2.36226	2.05124	2.16671	3.06639	2.94153	2.83775	7.25428
2.05	1.82197	1.54817	1.91388	1.86255	2.20668	1.34293	1.30979	1.31807	1.64854	1.27088	1.46036	1.54924	1.72316	1.48618	1.89216	2.14593	1.11844	1.01182	1.20599	2.57725	1.28158	1.50681	1.9324	2.13788	1.4999	1.72112	1.91502	3.31544	2.95087	2.37486	3.45437	7.63851
2.15	1.60054	1.31682	1.61548	1.58703	2.07404	1.095	1.15316	1.23869	1.52853	1.00348	1.05693	1.39679	1.2931	1.059	1.22804	1.682	0.974874	0.805124	1.14015	2.40284	1.38956	1.09927	2.09076	1.69899	1.47718	1.9511	1.76655	2.68923	2.73696	2.29723	2.94919	6.57031
2.25	1.76388	1.29624	1.57557	1.46501	1.8128	1.02349	1.10564	1.15809	1.33743	1.21481	0.979322	1.45365	1.1998	1.26381	1.11183	1.47908	0.919752	0.71922	1.11354	2.53017	1.22647	1.32133	1.78989	2.05353	1.7067	1.72207	1.72258	2.20617	2.61349	2.39913	2.72568	5.97958
2.35	1.80482	1.49385	1.41398	1.69602	1.76075	0.995132	1.13684	1.17056	1.38656	1.38391	0.901547	1.42862	1.21529	1.12074	1.07065	1.60061	0.979818	0.773151	1.19354	2.45304	1.24744	0.827263	2.06442	1.67142	1.58378	1.8794	1.63697	2.3761	2.6687	2.52538	2.93974	5.88652
2.45	1.82145	1.30976	1.66675	1.41869	1.89508	0.982531	1.19581	1.31671	1.38169	1.2273	0.949624	1.48698	1.29608	1.13932	1.11107	1.65097	1.01348	0.751143	1.11666	2.09511	1.21329	1.0842	2.28651	1.75034	1.67273	2.156	2.28806	2.4892	2.58379	2.23369	2.79281	5.62627
2.55	1.77515	1.27935	1.42666	1.57323	1.99837	1.05039	1.1972	1.22572	1.51349	1.48429	0.985255	1.71115	1.1226	1.09936	1.06337	1.61729	0.986845	0.681683	1.09918	2.12381	1.24381	0.978948	1.88364	1.90992	1.52093	2.00966	1.94304	2.29511	2.23759	2.01798	2.57204	5.69945
2.65	1.88014	1.38992	1.81381	1.70475	1.84833	1.07087	1.20266	1.23947	1.66584	1.17973	1.00091	1.65375	1.13451	1.13123	1.09085	1.77845	1.05108	0.733413	1.15247	2.10004	1.27102	1.16866	2.54068	1.95887	1.54202	2.13225	1.86016	2.28324	2.19877	2.29683	2.69207	5.72049
2.75	1.64308	1.28335	1.5962	1.69247	2.08643	1.09347	1.27177	1.25268	1.56487	1.34406	0.991909	1.73074	1.14032	1.10778	1.12306	1.55317	1.0533	0.702126	1.128	1.86162	1.29081	1.38956	2.16168	1.69473	1.31314	2.4114	1.94544	2.3723	2.10061	2.5915	2.36942	5.17658
2.85	2.0382	1.51353	1.78755	1.84371	2.15828	1.16627	1.50101	1.28396	1.74038	1.75554	0.998074	1.78499	1.37313	1.28456	1.18012	1.76569	1.00668	0.709489	1.17567	1.97268	1.21343	1.4951	2.42202	2.5577	1.57496	2.25607	1.88856	2.26825	2.18965	2.38582	2.27422	4.98246
2.95	2.2034	1.56712	2.13348	2.18962	2.44336	1.41045	2.01573	1.63964	1.94868	2.11678	1.25475	1.96726	2.15369	1.73988	1.16717	1.81117	1.18281	0.860509	1.35578	2.14391	1.63095	1.48742	2.7278	2.28349	1.67402	2.48736	2.20939	2.18848	2.53026	3.01341	2.14764	4.8801
3.05	2.72381	2.10108	2.46128	2.31396	2.84833	1.87401	2.39445	2.00525	2.3239	2.10614	1.90897	2.26642	2.3806	1.86653	1.68204	2.29657	1.46514	1.27191	1.68024	2.05637	1.78061	1.90847	2.23874	2.50717	2.07978	2.55911	2.4134	2.57299	2.50488	2.58966	2.27848	4.30868
3.15	2.86046	2.26877	2.40455	2.27217	3.03326	2.10654	2.347	2.23603	2.48432	2.63345	1.90399	2.18449	2.54034	1.7946	1.80245	2.25299	1.74662	1.32239	1.88196	2.31897	2.00936	1.8409	2.16604	2.62546	2.09083	2.5526	2.3692	2.47951	2.51767	2.42052	2.12941	3.97949
3.25	2.75118	2.33076	2.47758	2.45747	2.89225	2.16107	2.2552	2.40197	2.33574	2.60987	1.82942	2.31794	2.45125	1.99911	1.77443	2.20451	1.87084	1.35655	1.78287	2.28958	1.99669	1.85458	2.52371	2.24566	2.22142	2.38734	2.2973	2.44522	2.43367	2.82109	2.28546	3.92113
3.35	3.07615	2.10567	2.47672	2.36603	2.93321	2.20632	2.42915	2.451	2.35653	2.95523	2.13113	2.27666	2.36458	2.1103	1.89376	2.26855	1.77868	1.5015	1.74855	2.29157	1.85094	1.84028	2.52125	2.0802	2.04102	2.14511	2.19164	2.51372	2.65592	2.73064	2.37418	4.11397
3.45	3.26858	2.08281	2.44215	2.44108	2.87882	2.02595	2.46065	2.21303	2.49798	2.41988	1.89743	2.26101	2.55373	2.04644	1.87592	2.38875	1.78846	1.65693	1.70463	2.45817	1.98554	1.85946	2.10496	2.48227	2.22078	2.78229	2.054	2.35015	2.49657	2.98714	2.30761	4.18734
3.55	2.76424	2.32665	2.502	2.33469	3.12376	1.87034	2.38794	2.48818	2.57521	2.45848	2.18841	2.53491	2.30017	1.8845	1.82868	2.25131	1.61532	1.54197	1.73436	2.12569	1.96232	2.12257	2.20475	2.10371	2.3124	2.32359	2.19038	2.3343	2.35082	2.28417	2.17195	3.78726
3.65	3.1841	2.06393	2.24558	2.52436	2.85328	1.97617	2.30556	2.48663	2.33143	2.74634	2.01412	2.37077	2.67053	2.07923	1.88074	2.25057	1.80463	1.64157	1.86934	2.57762	2.07732	1.82109	2.24474	2.72753	2.34283	2.3197	2.43059	2.53888	2.49074	2.39263	2.2096	3.82644
3.75	2.96925	2.41127	2.41178	2.43525	2.89349	1.92128	2.2109	2.66577	2.35684	3.13316	1.90661	2.23039	2.36198	2.0131	1.95378	2.26732	1.78228	1.64291	1.79392	2.42766	1.71333	2.40826	2.32783	2.22764	2.18406	2.48828	2.27629	2.47643	2.60475	2.91011	2.1968	4.12699
3.85	2.91377	2.36377	2.70054	2.28732	2.84058	1.96743	2.24485	2.09289	2.27207	3.04961	2.0202	2.4161	2.0781	2.0847	1.85428	2.47216	1.96976	1.73789	1.60886	2.61872	1.71442	2.09356	2.50522	2.65875	2.35044	2.30702	2.32932	2.36797	2.6659	2.5554	2.39285	4.41951
3.95	2.62957	2.46099	2.48041	2.23645	3.26936	1.86938	2.37378	1.72944	2.31613	2.68541	2.02305	2.37123	2.08268	1.89842	1.85599	2.86329	1.68239	1.60394	1.66785	2.80657	1.61447	1.76985	2.20583	2.28887	2.17233	2.36226	2.05124	2.16671	3.06639	2.94153	2.83775	7.25428
