# Supplementary material for: UP-DOWN states and ripples differentially modulate membrane potential dynamics across DG, CA3, and CA1 in awake mice
Source: eLife. 2022 Jul 12;11:e69596. doi: 10.7554/eLife.69596 (PMC9275824; doi:10.7554/eLife.69596)
Supplement: Figure 5—source data 1. [file elife-69596-fig5-data1.xls]

## Sheet: DG State V_{m} mean
0	523502	524002	523501	523701	523801	524203	523301	524102	524001	523302	524003	524202	523601	523401	524201	659201	523402	524101	659202	523901	523702	523602
0.05	-2.19815	-2.68513	-0.524864	-0.38924	0.00755692	-1.62226	0.501768	-0.633614	-1.57085	2.40869	-0.546415	-0.615681	0.106098	0.660656	0.141113	-1.8637	-0.664692	-0.980789	-1.02111	-1.69674	-0.68693	-1.52414
0.15	-4.12983	-6.72577	-1.9704	-2.07432	-2.97861	-2.53675	-1.63302	-0.88376	-1.97021	-2.19787	-1.74291	-1.03568	-0.690966	-1.30372	-0.345779	-2.05094	-1.23264	-1.43684	-1.1239	-1.91667	-0.23661	-1.39343
0.25	-3.6173	-4.47149	-2.54638	-3.96358	-3.09089	-2.963	-3.12671	-2.96802	-2.04101	-2.32237	-2.71053	-1.35425	-1.06135	-1.69819	-0.794548	-1.84012	-0.565384	-0.990055	-1.75515	0.0980911	-1.19334	0.296981
0.35	-3.88835	-5.17999	-2.32226	-2.8495	-2.35626	-3.3133	-2.67065	-1.55722	-2.04011	-1.53101	-1.6277	-0.683439	-1.18054	-1.66375	-1.17651	-1.01791	-0.418797	-0.944241	-0.892792	-0.280972	-0.721596	1.53798
0.45	-3.20762	-1.74498	-2.94729	-3.59445	-2.21535	-2.62766	-1.41518	-2.59368	-2.03865	-1.99171	-0.814262	-0.649834	-0.884953	-0.965569	-0.348404	-1.39606	-0.384613	-0.676743	-0.690624	1.37971	0.198769	0.870224
0.55	-3.78427	-3.51598	-1.98262	-3.74837	-2.02697	-2.93538	-2.09228	-1.58915	-1.5722	-1.76752	-2.12784	-0.638636	-1.09255	-0.713081	-1.24328	-0.851662	-0.156853	-0.638918	-0.395309	1.78194	0.379459	2.77266
0.65	-2.64563	-2.99157	-1.91997	-3.71046	-2.72286	-2.5256	-2.2308	-1.7345	-1.61535	-2.76843	-0.636154	-0.986122	-0.664944	-0.993717	-0.161934	0.152163	-0.0863991	-0.424801	-0.284008	-0.63467	0.362274	3.38187
0.75	-3.61331	-3.44542	-1.98906	-1.83199	-2.48434	-2.40781	-1.76742	-1.61119	-0.722279	-2.42222	-1.06575	-0.965908	-1.07216	-0.631935	-1.06638	0.917614	-0.308926	-0.194462	-0.424801	0.420946	0.527122	3.60776
0.85	-2.56976	-3.95774	-2.02312	-1.95043	-1.89508	-1.78725	-1.56267	-2.09237	-0.217903	-3.29446	-1.15279	-0.125963	-1.51872	-0.015789	-1.15215	0.00432777	-0.231607	0.049778	0.572121	-1.65614	1.49158	4.21844
0.95	-0.857927	-3.14381	-0.296097	-0.425339	-0.334429	-0.973751	0.386948	-0.988157	0.883747	1.397	0.256042	0.849234	-0.964542	0.615658	-1.48475	1.58035	-0.588928	0.869865	0.592051	-1.49498	1.0587	3.48547
1.05	3.36774	0.936592	1.67242	1.24916	0.836502	0.462902	0.215425	0.946564	0.843521	2.35028	1.23426	2.81884	-0.486771	1.15499	1.50136	1.99976	0.685041	0.65769	1.4816	0.359447	1.07441	0.690331
1.15	4.96455	2.37389	2.55154	1.63331	2.06578	1.22246	1.72403	0.602367	2.53188	3.07417	1.83585	2.9239	0.672552	1.20576	1.43315	1.84088	-0.186064	0.819004	0.290066	0.863319	0.377903	-0.800343
1.25	4.08177	2.50623	2.72965	2.84775	2.57845	1.34175	3.70737	1.60251	2.63646	1.43458	1.8955	2.03386	1.36668	1.71527	0.936495	1.92527	1.33299	0.498524	1.04104	0.552525	1.17724	-0.59174
1.35	4.24021	1.73805	2.74657	1.92197	2.28443	1.7566	2.15147	1.8013	1.83046	1.11615	1.24236	2.65157	1.9764	1.91273	0.781034	0.936855	0.688381	0.568668	0.782909	0.571709	0.959038	-0.264656
1.45	4.39493	3.82771	3.42522	2.30378	1.95633	2.25254	2.55167	2.30054	2.32368	1.17652	1.30788	1.64923	1.48875	1.28127	0.104374	0.682859	1.57463	0.549284	0.752296	2.14096	0.526911	-2.74734
1.55	4.91534	3.69867	4.04467	1.80802	2.3553	1.97409	2.59694	2.15467	2.21486	2.32577	1.9918	2.2446	2.00763	1.04313	1.96385	1.43736	1.39285	0.768932	1.23967	0.286215	1.27777	-3.7882
1.65	5.11331	3.43606	3.30681	2.32402	3.44441	2.19108	2.32752	2.1979	2.23709	1.77254	1.681	2.82703	2.85576	0.761135	1.08737	1.49528	1.65062	1.02127	0.517471	0.982922	0.80751	-3.03004
1.75	4.96839	2.62788	3.3913	2.90709	2.9179	2.84275	2.70173	2.51624	2.30033	2.17481	1.52022	0.637188	1.73936	1.28262	3.54272	0.874043	1.13388	0.960224	0.0537205	0.988945	0.37755	-4.13626
1.85	5.47853	3.6954	3.51841	2.60135	2.94633	1.85529	2.15456	2.39449	2.12174	0.601322	2.62444	2.86289	2.54554	1.39624	2.40143	0.789705	1.59503	0.94228	0.94471	-0.295826	0.121964	-3.87599
1.95	3.02747	1.87212	3.2795	1.97137	2.43895	1.6056	0.952236	1.62461	1.17527	0.268139	2.66513	0.227146	2.26226	3.84279	0.467812	-0.276825	1.10501	0.31509	0.159546	-0.505384	-0.203676	-2.86635
2.05	-2.19815	-2.68513	-0.524864	-0.38924	0.00755692	-1.62226	0.501768	-0.633614	-1.57085	2.40869	-0.546415	-0.615681	0.106098	0.660656	0.141113	-1.8637	-0.664692	-0.980789	-1.02111	-1.69674	-0.68693	-1.52414
2.15	-4.12983	-6.72577	-1.9704	-2.07432	-2.97861	-2.53675	-1.63302	-0.88376	-1.97021	-2.19787	-1.74291	-1.03568	-0.690966	-1.30372	-0.345779	-2.05094	-1.23264	-1.43684	-1.1239	-1.91667	-0.23661	-1.39343
2.25	-3.6173	-4.47149	-2.54638	-3.96358	-3.09089	-2.963	-3.12671	-2.96802	-2.04101	-2.32237	-2.71053	-1.35425	-1.06135	-1.69819	-0.794548	-1.84012	-0.565384	-0.990055	-1.75515	0.0980911	-1.19334	0.296981
2.35	-3.88835	-5.17999	-2.32226	-2.8495	-2.35626	-3.3133	-2.67065	-1.55722	-2.04011	-1.53101	-1.6277	-0.683439	-1.18054	-1.66375	-1.17651	-1.01791	-0.418797	-0.944241	-0.892792	-0.280972	-0.721596	1.53798
2.45	-3.20762	-1.74498	-2.94729	-3.59445	-2.21535	-2.62766	-1.41518	-2.59368	-2.03865	-1.99171	-0.814262	-0.649834	-0.884953	-0.965569	-0.348404	-1.39606	-0.384613	-0.676743	-0.690624	1.37971	0.198769	0.870224
2.55	-3.78427	-3.51598	-1.98262	-3.74837	-2.02697	-2.93538	-2.09228	-1.58915	-1.5722	-1.76752	-2.12784	-0.638636	-1.09255	-0.713081	-1.24328	-0.851662	-0.156853	-0.638918	-0.395309	1.78194	0.379459	2.77266
2.65	-2.64563	-2.99157	-1.91997	-3.71046	-2.72286	-2.5256	-2.2308	-1.7345	-1.61535	-2.76843	-0.636154	-0.986122	-0.664944	-0.993717	-0.161934	0.152163	-0.0863991	-0.424801	-0.284008	-0.63467	0.362274	3.38187
2.75	-3.61331	-3.44542	-1.98906	-1.83199	-2.48434	-2.40781	-1.76742	-1.61119	-0.722279	-2.42222	-1.06575	-0.965908	-1.07216	-0.631935	-1.06638	0.917614	-0.308926	-0.194462	-0.424801	0.420946	0.527122	3.60776
2.85	-2.56976	-3.95774	-2.02312	-1.95043	-1.89508	-1.78725	-1.56267	-2.09237	-0.217903	-3.29446	-1.15279	-0.125963	-1.51872	-0.015789	-1.15215	0.00432777	-0.231607	0.049778	0.572121	-1.65614	1.49158	4.21844
2.95	-0.857927	-3.14381	-0.296097	-0.425339	-0.334429	-0.973751	0.386948	-0.988157	0.883747	1.397	0.256042	0.849234	-0.964542	0.615658	-1.48475	1.58035	-0.588928	0.869865	0.592051	-1.49498	1.0587	3.48547
3.05	3.36774	0.936592	1.67242	1.24916	0.836502	0.462902	0.215425	0.946564	0.843521	2.35028	1.23426	2.81884	-0.486771	1.15499	1.50136	1.99976	0.685041	0.65769	1.4816	0.359447	1.07441	0.690331
3.15	4.96455	2.37389	2.55154	1.63331	2.06578	1.22246	1.72403	0.602367	2.53188	3.07417	1.83585	2.9239	0.672552	1.20576	1.43315	1.84088	-0.186064	0.819004	0.290066	0.863319	0.377903	-0.800343
3.25	4.08177	2.50623	2.72965	2.84775	2.57845	1.34175	3.70737	1.60251	2.63646	1.43458	1.8955	2.03386	1.36668	1.71527	0.936495	1.92527	1.33299	0.498524	1.04104	0.552525	1.17724	-0.59174
3.35	4.24021	1.73805	2.74657	1.92197	2.28443	1.7566	2.15147	1.8013	1.83046	1.11615	1.24236	2.65157	1.9764	1.91273	0.781034	0.936855	0.688381	0.568668	0.782909	0.571709	0.959038	-0.264656
3.45	4.39493	3.82771	3.42522	2.30378	1.95633	2.25254	2.55167	2.30054	2.32368	1.17652	1.30788	1.64923	1.48875	1.28127	0.104374	0.682859	1.57463	0.549284	0.752296	2.14096	0.526911	-2.74734
3.55	4.91534	3.69867	4.04467	1.80802	2.3553	1.97409	2.59694	2.15467	2.21486	2.32577	1.9918	2.2446	2.00763	1.04313	1.96385	1.43736	1.39285	0.768932	1.23967	0.286215	1.27777	-3.7882
3.65	5.11331	3.43606	3.30681	2.32402	3.44441	2.19108	2.32752	2.1979	2.23709	1.77254	1.681	2.82703	2.85576	0.761135	1.08737	1.49528	1.65062	1.02127	0.517471	0.982922	0.80751	-3.03004
3.75	4.96839	2.62788	3.3913	2.90709	2.9179	2.84275	2.70173	2.51624	2.30033	2.17481	1.52022	0.637188	1.73936	1.28262	3.54272	0.874043	1.13388	0.960224	0.0537205	0.988945	0.37755	-4.13626
3.85	5.47853	3.6954	3.51841	2.60135	2.94633	1.85529	2.15456	2.39449	2.12174	0.601322	2.62444	2.86289	2.54554	1.39624	2.40143	0.789705	1.59503	0.94228	0.94471	-0.295826	0.121964	-3.87599
3.95	3.02747	1.87212	3.2795	1.97137	2.43895	1.6056	0.952236	1.62461	1.17527	0.268139	2.66513	0.227146	2.26226	3.84279	0.467812	-0.276825	1.10501	0.31509	0.159546	-0.505384	-0.203676	-2.86635

## Sheet: CA3 State V_{m} mean
0	525301	521502	525101	520901	525001	659105	719301	525403	521303	521602	580501	525404	580201	521304	580601	719002	520701	526202	719303	521401	719001	719103	521101	659101	521501	521102	719201	521302	525003	521202	520702	719202
0.05	-4.05242	-2.47155	-2.86513	-2.07787	-1.63126	-3.06106	-0.414503	-1.75776	-1.99144	-1.27684	-1.84758	-2.55701	-0.385864	-2.47104	-0.604103	-0.884335	-0.0551682	-0.695728	-1.9317	0.741997	0.330034	-0.736267	-0.615305	1.06439	-0.0797348	0.737434	-0.222904	0.033453	0.371567	1.84921	0.32015	3.13797
0.15	-2.09711	-2.00186	-2.06873	-0.873951	-1.15683	-2.63229	-0.868885	-1.52371	-1.76779	-1.88834	-0.884422	-1.48678	-0.823437	-0.737888	-0.234217	-2.67003	-0.126606	-0.544937	-1.94409	0.0780888	0.223047	0.724958	-0.623413	1.27164	0.269032	0.481081	0.148655	0.379911	1.52196	3.81953	0.921747	3.14662
0.25	-2.01647	-1.52622	-1.54814	-1.07536	-1.02782	-2.40581	-2.42965	-2.1515	-1.35359	-2.00639	-0.217609	-1.33092	-1.48746	-0.668686	-0.00568008	-2.25491	-0.318243	0.0531368	0.622948	-1.50101	-0.0143776	0.704895	1.22542	0.683371	1.13652	0.479898	0.438732	0.48764	1.96506	3.96759	0.930283	2.64902
0.35	-1.577	-0.995312	-1.16717	-1.07793	-1.12184	-2.2168	-1.5935	-0.738663	-1.32286	-1.24396	-0.37381	-0.871809	-1.93273	-0.0658379	0.0939598	-0.614899	0.0301552	0.131577	-0.0559654	-0.982826	0.562637	0.0972824	0.44754	0.630646	1.42679	0.605553	0.720062	0.910793	1.81417	3.85963	1.01893	2.36562
0.45	-1.89765	-0.906435	-1.42613	-1.94489	-0.650394	-1.07739	-1.7195	-1.6467	-1.19504	0.0613403	-0.385756	0.00559807	-0.798355	0.639668	0.0208015	0.700069	-0.221527	-0.252163	1.32176	0.703697	0.635773	-0.499052	1.11985	-0.220875	1.24612	0.818302	0.882942	1.52962	1.96219	1.75916	1.23631	2.32503
0.55	-1.6963	-0.303268	-0.886246	-0.563227	-0.706272	-0.963215	0.240402	-1.12222	-0.51664	-1.56845	-0.0836201	-0.205229	-0.32869	0.515385	0.0240173	1.21091	-0.128315	0.384274	1.31839	-0.215918	0.745232	-0.933603	0.179882	0.0583	0.956051	0.272694	0.862637	1.81552	1.97397	1.0232	1.40485	1.4644
0.65	-1.69986	-0.601244	0.0700779	-0.64245	-0.47958	0.123463	0.201733	0.712902	-0.369049	-0.346603	0.730049	-0.265326	1.73908	0.165535	0.276237	2.35675	0.237022	0.389427	1.23305	-0.649387	0.292665	-0.132563	0.739769	0.434734	0.960674	0.731316	0.967674	2.18826	1.51424	0.41288	1.62906	1.63932
0.75	-0.770731	0.325989	0.786697	-0.0729923	-0.240292	0.271393	0.418787	0.0995407	0.89397	-0.471714	0.714993	-0.231152	1.40887	1.02346	0.31144	2.64306	0.656729	0.574932	-2.11263	-0.0296707	-0.273777	1.82788	1.3951	-0.1726	1.03782	1.15081	0.701166	1.88153	2.47028	1.52153	1.53863	0.567078
0.85	0.53331	0.402548	1.46985	0.599373	0.713179	1.20858	0.628269	0.897154	1.25537	0.0601711	0.320208	1.27046	1.81784	1.83901	0.485821	3.39622	1.24039	0.382595	0.971527	0.693886	0.130836	1.28249	2.31025	0.725023	1.113	2.32076	0.592812	2.16745	2.83931	-0.605488	1.34154	0.709747
0.95	3.16005	0.89875	2.49554	1.94511	1.29472	2.30558	2.87479	2.29463	2.71512	1.09335	1.5475	1.27275	2.84515	3.16331	1.16554	4.04321	1.97717	1.05448	2.67709	1.00656	0.817263	1.56103	1.16423	1.4424	1.33551	1.94702	0.764694	0.215084	2.63958	0.43317	2.08256	-0.468674
1.05	2.22111	1.8979	2.40156	2.12685	1.55463	1.65192	0.186541	3.18657	2.13351	-0.507938	0.954201	1.0347	2.33124	1.9754	1.30896	0.918381	1.07346	0.664795	0.340076	0.810322	0.26375	0.889183	1.53201	0.511263	0.750214	0.743177	-0.125504	-1.03344	2.22637	-1.49883	-0.205212	-2.57946
1.15	2.02683	1.51472	1.70165	1.41624	1.8042	0.43515	0.939274	0.979561	1.30718	1.30662	0.933189	1.07034	1.45585	0.954309	1.08719	-0.0204468	0.642031	0.00540543	-0.0597382	-1.94425	-0.281916	1.23626	-0.0526695	0.308128	0.588043	-0.715357	-0.991016	-0.946198	-0.57671	-1.33932	-2.41212	-3.67763
1.25	1.18255	1.67847	0.849615	0.49843	1.60119	0.421913	-0.494698	0.862144	0.509352	-0.672092	0.287405	0.27227	1.24306	0.433598	0.187725	-0.066597	0.161827	-0.502724	-0.600039	0.0709553	-0.57991	-0.401321	0.848797	-0.40097	0.0853996	-0.809536	-0.649908	-0.851624	-0.985657	-0.950741	-1.99474	-4.95526
1.35	0.658871	1.17839	0.793377	1.01838	1.36351	0.283779	-0.0235958	-0.195946	-0.308971	-0.200024	0.152843	-0.555178	-0.250389	0.258018	-0.148228	-0.22666	-0.384558	-0.230677	-0.603848	-2.48577	-0.129696	-0.931221	-0.906612	-0.807596	0.0610714	-1.15363	-1.16097	-1.05028	-0.504091	-0.950886	-1.53848	-4.95246
1.45	0.612534	1.31455	0.288359	1.68852	0.745625	-0.00610352	-0.21368	-0.0122261	-0.0395126	-0.489349	0.531649	-1.10114	-0.405521	-0.612431	0.462521	-0.125437	-0.358883	-0.246059	-0.323139	-0.162781	-0.833603	-1.39217	-0.991669	-1.2816	-0.761581	-0.759979	-1.10545	-1.20424	-1.25382	-1.48008	-2.81096	-5.38014
1.55	0.693314	2.36102	-0.57338	0.447552	0.747772	-0.106546	-2.1782	-0.303623	-0.245771	-0.356117	0.839951	-0.830368	-0.317226	-0.967842	0.0962772	-1.20636	-0.533205	-0.0765285	-0.718266	-0.127094	-0.425472	-0.696564	-1.06204	-0.38422	-0.683006	-1.7445	-1.62463	-1.90967	-1.84311	-3.65202	-2.91733	-5.40717
1.65	0.556969	0.915466	0.554482	0.133884	0.863869	-0.4758	1.82603	-0.7882	-0.33334	0.214516	0.367077	-0.868565	-1.36873	-0.322277	-0.683178	-1.00496	-0.373463	-0.449226	-0.234268	-0.622746	-0.563774	-1.03391	-1.04989	-1.10852	-0.419273	-1.144	-1.13051	-1.82798	-1.85998	-0.858788	-2.82894	-5.41814
1.75	0.087801	0.251713	-0.370461	0.0974121	0.0538101	-0.285286	3.95565	0.0671768	-0.57383	-0.264193	0.499668	-0.403175	-1.54169	-0.677837	-0.707409	-0.370831	0.0191154	-0.341	-0.748177	-1.7179	-0.760059	-1.75129	-1.85569	-0.797256	-0.887249	-1.21867	-1.36553	-1.78337	-1.9575	-1.37167	-3.20743	-5.40655
1.85	0.0546913	-0.0405502	0.308662	-0.674236	-1.26879	0.0360241	1.45345	-0.128227	-0.855381	0.31636	-0.254135	-0.475065	-1.10833	-1.07313	-1.1856	-0.325237	-0.348743	-0.528975	-0.312263	0.132286	-0.445763	-1.50528	-1.33112	-0.999252	-1.73373	-1.01774	-1.6576	-1.84867	-2.03706	2.87577	-3.50327	-5.3877
1.95	-1.24255	-1.9168	-0.777653	-1.93796	-1.16584	-0.645361	-0.578756	-0.674881	-1.12702	0.759552	-1.31327	-1.18346	-0.682638	-1.67069	-1.56997	0.199314	-0.726444	-0.469992	-0.376783	-1.47395	0.653263	-3.23273	-0.143293	-0.0493698	-1.67606	-1.20532	-1.35781	-0.615063	-1.48223	1.22991	-1.62027	-3.25287
2.05	-4.05242	-2.47155	-2.86513	-2.07787	-1.63126	-3.06106	-0.414503	-1.75776	-1.99144	-1.27684	-1.84758	-2.55701	-0.385864	-2.47104	-0.604103	-0.884335	-0.0551682	-0.695728	-1.9317	0.741997	0.330034	-0.736267	-0.615305	1.06439	-0.0797348	0.737434	-0.222904	0.033453	0.371567	1.84921	0.32015	3.13797
2.15	-2.09711	-2.00186	-2.06873	-0.873951	-1.15683	-2.63229	-0.868885	-1.52371	-1.76779	-1.88834	-0.884422	-1.48678	-0.823437	-0.737888	-0.234217	-2.67003	-0.126606	-0.544937	-1.94409	0.0780888	0.223047	0.724958	-0.623413	1.27164	0.269032	0.481081	0.148655	0.379911	1.52196	3.81953	0.921747	3.14662
2.25	-2.01647	-1.52622	-1.54814	-1.07536	-1.02782	-2.40581	-2.42965	-2.1515	-1.35359	-2.00639	-0.217609	-1.33092	-1.48746	-0.668686	-0.00568008	-2.25491	-0.318243	0.0531368	0.622948	-1.50101	-0.0143776	0.704895	1.22542	0.683371	1.13652	0.479898	0.438732	0.48764	1.96506	3.96759	0.930283	2.64902
2.35	-1.577	-0.995312	-1.16717	-1.07793	-1.12184	-2.2168	-1.5935	-0.738663	-1.32286	-1.24396	-0.37381	-0.871809	-1.93273	-0.0658379	0.0939598	-0.614899	0.0301552	0.131577	-0.0559654	-0.982826	0.562637	0.0972824	0.44754	0.630646	1.42679	0.605553	0.720062	0.910793	1.81417	3.85963	1.01893	2.36562
2.45	-1.89765	-0.906435	-1.42613	-1.94489	-0.650394	-1.07739	-1.7195	-1.6467	-1.19504	0.0613403	-0.385756	0.00559807	-0.798355	0.639668	0.0208015	0.700069	-0.221527	-0.252163	1.32176	0.703697	0.635773	-0.499052	1.11985	-0.220875	1.24612	0.818302	0.882942	1.52962	1.96219	1.75916	1.23631	2.32503
2.55	-1.6963	-0.303268	-0.886246	-0.563227	-0.706272	-0.963215	0.240402	-1.12222	-0.51664	-1.56845	-0.0836201	-0.205229	-0.32869	0.515385	0.0240173	1.21091	-0.128315	0.384274	1.31839	-0.215918	0.745232	-0.933603	0.179882	0.0583	0.956051	0.272694	0.862637	1.81552	1.97397	1.0232	1.40485	1.4644
2.65	-1.69986	-0.601244	0.0700779	-0.64245	-0.47958	0.123463	0.201733	0.712902	-0.369049	-0.346603	0.730049	-0.265326	1.73908	0.165535	0.276237	2.35675	0.237022	0.389427	1.23305	-0.649387	0.292665	-0.132563	0.739769	0.434734	0.960674	0.731316	0.967674	2.18826	1.51424	0.41288	1.62906	1.63932
2.75	-0.770731	0.325989	0.786697	-0.0729923	-0.240292	0.271393	0.418787	0.0995407	0.89397	-0.471714	0.714993	-0.231152	1.40887	1.02346	0.31144	2.64306	0.656729	0.574932	-2.11263	-0.0296707	-0.273777	1.82788	1.3951	-0.1726	1.03782	1.15081	0.701166	1.88153	2.47028	1.52153	1.53863	0.567078
2.85	0.53331	0.402548	1.46985	0.599373	0.713179	1.20858	0.628269	0.897154	1.25537	0.0601711	0.320208	1.27046	1.81784	1.83901	0.485821	3.39622	1.24039	0.382595	0.971527	0.693886	0.130836	1.28249	2.31025	0.725023	1.113	2.32076	0.592812	2.16745	2.83931	-0.605488	1.34154	0.709747
2.95	3.16005	0.89875	2.49554	1.94511	1.29472	2.30558	2.87479	2.29463	2.71512	1.09335	1.5475	1.27275	2.84515	3.16331	1.16554	4.04321	1.97717	1.05448	2.67709	1.00656	0.817263	1.56103	1.16423	1.4424	1.33551	1.94702	0.764694	0.215084	2.63958	0.43317	2.08256	-0.468674
3.05	2.22111	1.8979	2.40156	2.12685	1.55463	1.65192	0.186541	3.18657	2.13351	-0.507938	0.954201	1.0347	2.33124	1.9754	1.30896	0.918381	1.07346	0.664795	0.340076	0.810322	0.26375	0.889183	1.53201	0.511263	0.750214	0.743177	-0.125504	-1.03344	2.22637	-1.49883	-0.205212	-2.57946
3.15	2.02683	1.51472	1.70165	1.41624	1.8042	0.43515	0.939274	0.979561	1.30718	1.30662	0.933189	1.07034	1.45585	0.954309	1.08719	-0.0204468	0.642031	0.00540543	-0.0597382	-1.94425	-0.281916	1.23626	-0.0526695	0.308128	0.588043	-0.715357	-0.991016	-0.946198	-0.57671	-1.33932	-2.41212	-3.67763
3.25	1.18255	1.67847	0.849615	0.49843	1.60119	0.421913	-0.494698	0.862144	0.509352	-0.672092	0.287405	0.27227	1.24306	0.433598	0.187725	-0.066597	0.161827	-0.502724	-0.600039	0.0709553	-0.57991	-0.401321	0.848797	-0.40097	0.0853996	-0.809536	-0.649908	-0.851624	-0.985657	-0.950741	-1.99474	-4.95526
3.35	0.658871	1.17839	0.793377	1.01838	1.36351	0.283779	-0.0235958	-0.195946	-0.308971	-0.200024	0.152843	-0.555178	-0.250389	0.258018	-0.148228	-0.22666	-0.384558	-0.230677	-0.603848	-2.48577	-0.129696	-0.931221	-0.906612	-0.807596	0.0610714	-1.15363	-1.16097	-1.05028	-0.504091	-0.950886	-1.53848	-4.95246
3.45	0.612534	1.31455	0.288359	1.68852	0.745625	-0.00610352	-0.21368	-0.0122261	-0.0395126	-0.489349	0.531649	-1.10114	-0.405521	-0.612431	0.462521	-0.125437	-0.358883	-0.246059	-0.323139	-0.162781	-0.833603	-1.39217	-0.991669	-1.2816	-0.761581	-0.759979	-1.10545	-1.20424	-1.25382	-1.48008	-2.81096	-5.38014
3.55	0.693314	2.36102	-0.57338	0.447552	0.747772	-0.106546	-2.1782	-0.303623	-0.245771	-0.356117	0.839951	-0.830368	-0.317226	-0.967842	0.0962772	-1.20636	-0.533205	-0.0765285	-0.718266	-0.127094	-0.425472	-0.696564	-1.06204	-0.38422	-0.683006	-1.7445	-1.62463	-1.90967	-1.84311	-3.65202	-2.91733	-5.40717
3.65	0.556969	0.915466	0.554482	0.133884	0.863869	-0.4758	1.82603	-0.7882	-0.33334	0.214516	0.367077	-0.868565	-1.36873	-0.322277	-0.683178	-1.00496	-0.373463	-0.449226	-0.234268	-0.622746	-0.563774	-1.03391	-1.04989	-1.10852	-0.419273	-1.144	-1.13051	-1.82798	-1.85998	-0.858788	-2.82894	-5.41814
3.75	0.087801	0.251713	-0.370461	0.0974121	0.0538101	-0.285286	3.95565	0.0671768	-0.57383	-0.264193	0.499668	-0.403175	-1.54169	-0.677837	-0.707409	-0.370831	0.0191154	-0.341	-0.748177	-1.7179	-0.760059	-1.75129	-1.85569	-0.797256	-0.887249	-1.21867	-1.36553	-1.78337	-1.9575	-1.37167	-3.20743	-5.40655
3.85	0.0546913	-0.0405502	0.308662	-0.674236	-1.26879	0.0360241	1.45345	-0.128227	-0.855381	0.31636	-0.254135	-0.475065	-1.10833	-1.07313	-1.1856	-0.325237	-0.348743	-0.528975	-0.312263	0.132286	-0.445763	-1.50528	-1.33112	-0.999252	-1.73373	-1.01774	-1.6576	-1.84867	-2.03706	2.87577	-3.50327	-5.3877
3.95	-1.24255	-1.9168	-0.777653	-1.93796	-1.16584	-0.645361	-0.578756	-0.674881	-1.12702	0.759552	-1.31327	-1.18346	-0.682638	-1.67069	-1.56997	0.199314	-0.726444	-0.469992	-0.376783	-1.47395	0.653263	-3.23273	-0.143293	-0.0493698	-1.67606	-1.20532	-1.35781	-0.615063	-1.48223	1.22991	-1.62027	-3.25287

## Sheet: CA1 State V_{m} mean
0	523101	524302	524303	522902	522402	523201	522503	524401	522802	522703	522701	524304	522202	522403	522002	522702	523002	522001	521701	524301	522101	522401	523001	522201	522502	522501	659203	522203	522301	522801	524305	521801
0.05	-1.02151	-0.695057	-0.548698	-1.36901	-0.996117	-0.849924	-1.42213	-1.38321	-1.40249	-1.4447	-0.957951	0.00808525	-1.19418	-0.745113	-0.512491	-1.31625	-0.589096	-0.871361	-1.05166	0.788589	-0.872406	-0.554119	-0.615669	-1.77017	-1.38672	-0.717834	-1.85581	-0.107948	-0.508965	-2.32915	1.833	3.81725
0.15	-1.17912	-1.37243	-0.0233517	-1.82031	-1.8293	-1.48882	-1.45427	-1.27081	-1.19223	-1.4667	-1.48657	-0.273285	-2.09493	-1.8686	-0.897797	-1.86165	-0.869549	-0.826729	-0.625397	0.162239	-0.552635	-1.19732	1.41978	-1.3248	-1.28616	-0.576717	-0.77537	-0.323006	-0.407993	-0.294861	2.38145	2.79632
0.25	-0.345482	-0.424343	-0.246153	-1.85411	-1.62724	-1.56575	-1.64296	-1.62863	-1.02316	-1.61363	-1.29389	-0.38258	-1.41627	-1.5583	-0.797073	-1.23364	-1.11766	-0.709633	-0.736923	0.0330486	-0.832615	-0.878952	-0.69529	0.0299339	-0.868601	-0.635239	-0.7262	-0.336845	-0.0069046	1.09014	2.82172	2.50572
0.35	-0.486168	-0.555424	-0.885349	-1.32444	-1.01156	-1.4024	-1.20732	-1.0784	-0.738796	-0.73131	-1.25809	0.143394	-1.28213	-0.608524	-0.822456	-0.0887718	-0.790596	-0.680504	-0.767138	1.01945	-0.98596	-1.18568	1.76738	-0.245758	0.0617409	-0.38917	-0.187752	-0.0908508	0.975317	1.26714	1.93998	1.92063
0.45	0.759792	-0.679518	0.323814	-1.44072	-0.499142	-1.22201	-1.65709	-0.432999	-0.981941	-0.866831	-1.17582	0.687708	-1.31524	-1.83576	-0.796196	-0.47114	-0.623421	-0.698269	-0.589241	0.0668468	-0.495735	-0.944744	0.274681	-0.193981	0.351429	-0.156115	0.617308	0.362774	0.606203	0.680609	2.26171	1.41254
0.55	0.398586	-0.567171	-0.388126	-0.848644	-0.882774	-1.15575	-1.09328	-0.573006	-0.417233	-0.530594	-0.875809	0.817234	-1.16527	-1.58932	-0.743114	0.226109	-0.877373	-0.803049	-0.554499	0.822914	-0.445217	-0.481319	-1.01321	-0.476513	0.256523	0.308857	-0.00712204	1.15948	-0.036808	0.456018	2.91669	1.34636
0.65	0.262722	-0.680763	1.17007	-1.02309	-0.110821	-0.831644	-1.12168	-0.853794	-0.365154	-0.702744	-0.889256	0.821503	-1.6458	-1.82745	-0.827976	0.175476	-0.647343	-0.517366	-0.520065	0.260662	-0.402624	0.10861	0.356247	0.447849	-0.135681	-0.810396	-0.0489426	1.35147	0.125278	1.66098	2.16172	1.01939
0.75	0.780003	-0.155142	1.57236	-0.918514	0.219887	-0.523537	-0.796846	-0.613605	0.243317	-0.27412	-0.93499	1.1562	-1.03019	-1.52955	-0.466702	0.000537872	-0.5354	-0.71286	-0.426373	0.659681	-0.375946	0.50757	1.79014	-0.524603	-0.821671	1.93815	0.501411	0.758018	0.423462	2.49789	2.55117	0.345058
0.85	0.548903	-0.174294	1.19729	-0.000164032	1.68299	-0.178135	-0.153561	-0.409725	0.523037	0.890802	-0.626713	1.27154	-0.545021	-0.549208	-0.462465	0.632421	-0.230402	-0.357239	-0.323904	0.131144	-0.249907	1.25637	3.05164	1.13753	-0.448336	1.55991	0.366301	0.71769	0.514221	2.93574	2.06843	-0.370647
0.95	3.14376	0.662395	2.64091	0.424921	1.68275	0.832645	0.794018	0.453581	1.72402	1.03437	-0.124929	2.56202	0.296318	-0.0441055	0.0662651	1.24835	0.318882	0.320694	0.196339	1.15828	0.621693	1.70575	2.3793	1.49112	0.708427	0.747478	0.683487	1.32748	0.610535	3.37865	2.08903	-1.01035
1.05	1.77317	2.21988	3.50529	1.3268	2.0089	0.905102	1.4431	0.872135	1.67907	1.36328	1.03561	2.58529	1.30654	0.242945	0.761066	1.47185	0.873344	0.754597	0.91168	0.761484	0.832823	-0.196102	1.35219	1.44569	1.09526	1.73717	0.318195	0.501438	0.211887	2.64423	0.285957	-1.92982
1.15	1.63872	2.34653	2.39271	1.87943	2.13724	1.26051	1.53798	1.28669	1.79562	1.38497	0.69977	2.63626	1.44591	0.461409	0.947327	1.30894	1.33921	0.507217	1.0191	2.21912	1.17987	0.554398	1.88292	1.49936	0.198177	2.11607	0.679703	-0.43116	-0.200443	0.931126	-0.825962	-2.54874
1.25	2.76432	2.28526	2.00119	1.0614	1.26498	1.49483	1.24357	1.25997	0.929928	1.07384	0.669079	1.90809	0.635361	0.746786	0.923048	0.167339	0.914768	0.46591	0.994385	1.71872	0.376448	0.614403	1.45422	-0.0956669	0.148239	-0.3538	-0.00278282	-0.177261	-0.00933838	-0.770527	-1.16543	-3.13731
1.35	1.5836	1.80598	1.48696	0.916534	0.281498	1.72792	0.675028	1.28727	1.78922	1.00843	0.696117	1.28446	0.520435	0.822468	0.850658	0.444775	0.558363	0.675529	0.499538	0.752871	1.18713	-0.222801	1.28951	-0.0642204	0.236416	-1.21259	-0.300823	-0.285843	0.448608	-1.78156	-0.730091	-2.98271
1.45	2.35384	1.56047	0.954643	1.07968	0.54216	0.902914	0.677944	1.32761	1.10541	0.573898	0.952019	0.972729	0.290424	1.07523	0.842791	0.485939	0.591419	0.791763	0.693161	1.3821	0.293926	0.534786	1.1919	0.431965	-0.241516	-0.469803	-0.342278	0.761311	-0.173771	-0.56847	-2.14281	-3.43138
1.55	1.39194	1.60598	2.01678	0.74535	1.04795	1.19457	0.900936	1.89957	1.07805	0.548891	0.831511	1.11469	0.700359	0.748955	0.769222	0.633505	0.561945	1.18886	0.673006	0.911251	0.265942	-0.153252	0.296921	-0.123032	0.024992	-0.464195	-0.240381	0.056097	-0.648561	-2.32894	-1.61986	-3.59911
1.65	1.92667	0.776144	0.710163	0.498249	0.596352	0.709545	0.847046	1.32847	0.592743	0.832308	1.70297	1.76385	0.681911	0.0657539	0.867779	0.298386	0.579685	0.617771	0.237356	1.41605	0.50071	0.225708	-0.535374	-1.34353	-0.446386	-0.17202	-0.421125	-0.618229	-0.516502	-1.26982	-1.73064	-3.75063
1.75	2.34266	1.23676	0.447643	0.602943	0.435236	0.466038	0.45615	1.08428	0.326475	0.813911	1.57271	0.746534	0.268539	0.308512	1.07393	0.152809	0.611141	1.1757	0.579449	1.37213	0.00971031	1.25942	-0.673805	-1.08621	-0.176762	-0.422684	-0.163574	-0.445427	-0.744736	-1.49585	-1.64619	-3.52672
1.85	1.06876	2.1802	1.24578	0.511219	0.65023	0.50378	0.178555	-0.967106	0.259583	0.746557	1.35428	1.19913	-0.0384102	0.372555	0.871819	0.829155	0.445204	0.937256	0.123413	0.419571	-0.117966	-0.322872	-0.316502	-1.3484	0.107487	-1.48943	-1.05767	-0.704533	-0.935642	-2.0834	-0.552467	-3.61351
1.95	0.246445	0.838413	0.0816975	-0.11891	0.304226	0.190407	-0.34285	-1.20687	-0.650787	0.5984	0.505598	0.42885	-0.598591	0.421185	0.762911	0.839298	-0.264496	0.326723	-0.637493	1.82405	-0.83802	-1.26752	-0.145288	-1.05586	-0.729092	-1.16187	-1.62696	-0.415962	-0.249084	-2.42187	-1.12181	0.107489
2.05	-1.02151	-0.695057	-0.548698	-1.36901	-0.996117	-0.849924	-1.42213	-1.38321	-1.40249	-1.4447	-0.957951	0.00808525	-1.19418	-0.745113	-0.512491	-1.31625	-0.589096	-0.871361	-1.05166	0.788589	-0.872406	-0.554119	-0.615669	-1.77017	-1.38672	-0.717834	-1.85581	-0.107948	-0.508965	-2.32915	1.833	3.81725
2.15	-1.17912	-1.37243	-0.0233517	-1.82031	-1.8293	-1.48882	-1.45427	-1.27081	-1.19223	-1.4667	-1.48657	-0.273285	-2.09493	-1.8686	-0.897797	-1.86165	-0.869549	-0.826729	-0.625397	0.162239	-0.552635	-1.19732	1.41978	-1.3248	-1.28616	-0.576717	-0.77537	-0.323006	-0.407993	-0.294861	2.38145	2.79632
2.25	-0.345482	-0.424343	-0.246153	-1.85411	-1.62724	-1.56575	-1.64296	-1.62863	-1.02316	-1.61363	-1.29389	-0.38258	-1.41627	-1.5583	-0.797073	-1.23364	-1.11766	-0.709633	-0.736923	0.0330486	-0.832615	-0.878952	-0.69529	0.0299339	-0.868601	-0.635239	-0.7262	-0.336845	-0.0069046	1.09014	2.82172	2.50572
2.35	-0.486168	-0.555424	-0.885349	-1.32444	-1.01156	-1.4024	-1.20732	-1.0784	-0.738796	-0.73131	-1.25809	0.143394	-1.28213	-0.608524	-0.822456	-0.0887718	-0.790596	-0.680504	-0.767138	1.01945	-0.98596	-1.18568	1.76738	-0.245758	0.0617409	-0.38917	-0.187752	-0.0908508	0.975317	1.26714	1.93998	1.92063
2.45	0.759792	-0.679518	0.323814	-1.44072	-0.499142	-1.22201	-1.65709	-0.432999	-0.981941	-0.866831	-1.17582	0.687708	-1.31524	-1.83576	-0.796196	-0.47114	-0.623421	-0.698269	-0.589241	0.0668468	-0.495735	-0.944744	0.274681	-0.193981	0.351429	-0.156115	0.617308	0.362774	0.606203	0.680609	2.26171	1.41254
2.55	0.398586	-0.567171	-0.388126	-0.848644	-0.882774	-1.15575	-1.09328	-0.573006	-0.417233	-0.530594	-0.875809	0.817234	-1.16527	-1.58932	-0.743114	0.226109	-0.877373	-0.803049	-0.554499	0.822914	-0.445217	-0.481319	-1.01321	-0.476513	0.256523	0.308857	-0.00712204	1.15948	-0.036808	0.456018	2.91669	1.34636
2.65	0.262722	-0.680763	1.17007	-1.02309	-0.110821	-0.831644	-1.12168	-0.853794	-0.365154	-0.702744	-0.889256	0.821503	-1.6458	-1.82745	-0.827976	0.175476	-0.647343	-0.517366	-0.520065	0.260662	-0.402624	0.10861	0.356247	0.447849	-0.135681	-0.810396	-0.0489426	1.35147	0.125278	1.66098	2.16172	1.01939
2.75	0.780003	-0.155142	1.57236	-0.918514	0.219887	-0.523537	-0.796846	-0.613605	0.243317	-0.27412	-0.93499	1.1562	-1.03019	-1.52955	-0.466702	0.000537872	-0.5354	-0.71286	-0.426373	0.659681	-0.375946	0.50757	1.79014	-0.524603	-0.821671	1.93815	0.501411	0.758018	0.423462	2.49789	2.55117	0.345058
2.85	0.548903	-0.174294	1.19729	-0.000164032	1.68299	-0.178135	-0.153561	-0.409725	0.523037	0.890802	-0.626713	1.27154	-0.545021	-0.549208	-0.462465	0.632421	-0.230402	-0.357239	-0.323904	0.131144	-0.249907	1.25637	3.05164	1.13753	-0.448336	1.55991	0.366301	0.71769	0.514221	2.93574	2.06843	-0.370647
2.95	3.14376	0.662395	2.64091	0.424921	1.68275	0.832645	0.794018	0.453581	1.72402	1.03437	-0.124929	2.56202	0.296318	-0.0441055	0.0662651	1.24835	0.318882	0.320694	0.196339	1.15828	0.621693	1.70575	2.3793	1.49112	0.708427	0.747478	0.683487	1.32748	0.610535	3.37865	2.08903	-1.01035
3.05	1.77317	2.21988	3.50529	1.3268	2.0089	0.905102	1.4431	0.872135	1.67907	1.36328	1.03561	2.58529	1.30654	0.242945	0.761066	1.47185	0.873344	0.754597	0.91168	0.761484	0.832823	-0.196102	1.35219	1.44569	1.09526	1.73717	0.318195	0.501438	0.211887	2.64423	0.285957	-1.92982
3.15	1.63872	2.34653	2.39271	1.87943	2.13724	1.26051	1.53798	1.28669	1.79562	1.38497	0.69977	2.63626	1.44591	0.461409	0.947327	1.30894	1.33921	0.507217	1.0191	2.21912	1.17987	0.554398	1.88292	1.49936	0.198177	2.11607	0.679703	-0.43116	-0.200443	0.931126	-0.825962	-2.54874
3.25	2.76432	2.28526	2.00119	1.0614	1.26498	1.49483	1.24357	1.25997	0.929928	1.07384	0.669079	1.90809	0.635361	0.746786	0.923048	0.167339	0.914768	0.46591	0.994385	1.71872	0.376448	0.614403	1.45422	-0.0956669	0.148239	-0.3538	-0.00278282	-0.177261	-0.00933838	-0.770527	-1.16543	-3.13731
3.35	1.5836	1.80598	1.48696	0.916534	0.281498	1.72792	0.675028	1.28727	1.78922	1.00843	0.696117	1.28446	0.520435	0.822468	0.850658	0.444775	0.558363	0.675529	0.499538	0.752871	1.18713	-0.222801	1.28951	-0.0642204	0.236416	-1.21259	-0.300823	-0.285843	0.448608	-1.78156	-0.730091	-2.98271
3.45	2.35384	1.56047	0.954643	1.07968	0.54216	0.902914	0.677944	1.32761	1.10541	0.573898	0.952019	0.972729	0.290424	1.07523	0.842791	0.485939	0.591419	0.791763	0.693161	1.3821	0.293926	0.534786	1.1919	0.431965	-0.241516	-0.469803	-0.342278	0.761311	-0.173771	-0.56847	-2.14281	-3.43138
3.55	1.39194	1.60598	2.01678	0.74535	1.04795	1.19457	0.900936	1.89957	1.07805	0.548891	0.831511	1.11469	0.700359	0.748955	0.769222	0.633505	0.561945	1.18886	0.673006	0.911251	0.265942	-0.153252	0.296921	-0.123032	0.024992	-0.464195	-0.240381	0.056097	-0.648561	-2.32894	-1.61986	-3.59911
3.65	1.92667	0.776144	0.710163	0.498249	0.596352	0.709545	0.847046	1.32847	0.592743	0.832308	1.70297	1.76385	0.681911	0.0657539	0.867779	0.298386	0.579685	0.617771	0.237356	1.41605	0.50071	0.225708	-0.535374	-1.34353	-0.446386	-0.17202	-0.421125	-0.618229	-0.516502	-1.26982	-1.73064	-3.75063
3.75	2.34266	1.23676	0.447643	0.602943	0.435236	0.466038	0.45615	1.08428	0.326475	0.813911	1.57271	0.746534	0.268539	0.308512	1.07393	0.152809	0.611141	1.1757	0.579449	1.37213	0.00971031	1.25942	-0.673805	-1.08621	-0.176762	-0.422684	-0.163574	-0.445427	-0.744736	-1.49585	-1.64619	-3.52672
3.85	1.06876	2.1802	1.24578	0.511219	0.65023	0.50378	0.178555	-0.967106	0.259583	0.746557	1.35428	1.19913	-0.0384102	0.372555	0.871819	0.829155	0.445204	0.937256	0.123413	0.419571	-0.117966	-0.322872	-0.316502	-1.3484	0.107487	-1.48943	-1.05767	-0.704533	-0.935642	-2.0834	-0.552467	-3.61351
3.95	0.246445	0.838413	0.0816975	-0.11891	0.304226	0.190407	-0.34285	-1.20687	-0.650787	0.5984	0.505598	0.42885	-0.598591	0.421185	0.762911	0.839298	-0.264496	0.326723	-0.637493	1.82405	-0.83802	-1.26752	-0.145288	-1.05586	-0.729092	-1.16187	-1.62696	-0.415962	-0.249084	-2.42187	-1.12181	0.107489

## Sheet: DG State V_{m} s.d.
0	523502	524002	523501	523701	523801	524203	523301	524102	524001	523302	524003	524202	523601	523401	524201	659201	523402	524101	659202	523901	523702	523602
0.05	3.06019	3.44624	2.75194	3.33663	3.56165	2.10204	3.58188	3.29416	2.86325	4.18229	3.3812	2.40811	2.65479	2.538	2.74701	2.49631	2.62542	2.43146	2.87074	3.07926	2.90445	2.59107
0.15	2.87583	3.0454	2.54067	3.2203	3.41552	2.01398	3.35056	3.47948	2.67743	4.05994	3.09652	2.36665	2.50885	2.40677	2.71174	2.57282	2.60799	2.47161	2.89451	3.04151	2.84177	2.58558
0.25	2.8571	3.32007	2.52934	3.22404	3.24753	1.92949	3.41023	3.44478	2.62303	3.56081	2.8797	2.39947	2.57424	2.55125	2.69272	2.47908	2.61424	2.42502	2.78599	2.71201	2.88426	2.57438
0.35	2.77742	3.23317	2.54035	3.15122	3.43571	1.97361	3.48539	3.38038	2.55116	3.73311	2.90232	2.42597	2.70335	2.38006	2.63982	2.63234	2.58241	2.41515	2.90297	2.83944	2.77495	2.65077
0.45	2.95044	3.51759	2.42802	3.16872	3.41771	1.9433	3.29035	3.41416	2.51194	3.90968	2.95116	2.41765	2.66477	2.46981	2.74794	2.44325	2.57603	2.42522	2.98268	2.6971	2.85574	2.50869
0.55	3.04682	3.37116	2.49512	3.39463	3.66802	1.94893	3.4462	3.63048	2.59071	3.72128	2.86521	2.21078	2.64163	2.55823	2.6076	2.57246	2.52626	2.48726	2.99696	3.22975	2.97964	2.30789
0.65	2.96051	3.2888	2.60731	3.35313	3.66395	1.98555	3.30866	3.40687	2.78448	3.78637	2.89289	2.39405	2.78438	2.30018	2.6526	2.7966	2.43876	2.51936	3.05654	3.07759	2.9067	2.31504
0.75	2.9385	2.97532	2.51831	3.69096	3.35604	2.05473	3.40703	3.55248	2.63719	3.35091	3.12132	2.3563	2.77241	2.28521	2.83716	2.766	2.43219	2.55823	2.99025	2.81475	2.92555	2.19726
0.85	3.121	3.01101	2.5411	3.8906	3.67204	2.1157	3.36488	3.45113	2.78253	3.77169	3.05268	2.47125	2.8264	2.59692	2.8681	2.76347	2.4612	2.58391	3.12258	3.19952	3.00893	2.1516
0.95	3.52195	3.63341	2.59352	4.22924	3.84334	2.49107	3.81146	3.83139	2.96141	4.52026	3.05374	2.62462	2.96821	2.72645	2.87322	3.07148	2.71265	2.71275	3.06883	3.02817	2.97143	2.45274
1.05	3.97043	3.93065	3.22301	4.20069	3.88311	2.70823	4.15551	4.02562	3.02479	4.08118	3.14732	2.93513	3.2579	3.0103	3.40249	3.33233	2.67273	2.79346	3.41527	3.74004	3.06503	2.53159
1.15	3.95042	4.34556	3.02952	4.09121	4.0091	2.73147	4.0858	4.12205	3.22886	4.20374	2.97947	2.85209	3.21329	3.01613	3.1904	3.14985	2.53966	2.74132	3.38438	3.80754	3.15629	2.55726
1.25	4.08326	4.25257	3.2117	4.13865	3.84254	2.74344	4.14479	4.21451	3.12704	3.93304	2.91474	2.91179	3.11241	3.00585	3.45935	3.22857	2.75648	2.81621	3.3052	3.55563	3.13861	2.58811
1.35	3.94297	4.10146	3.09718	4.16144	3.6234	2.70899	4.0657	4.08083	3.076	4.23197	2.91084	2.70013	3.0724	2.87349	3.2731	3.26527	2.62505	2.80564	3.35462	3.58738	3.24618	2.74842
1.45	4.02517	4.14748	3.31393	4.12772	3.72241	2.6768	3.92819	4.26389	3.00566	3.78353	2.9109	2.91312	3.13446	2.93063	3.20134	2.99731	2.61196	2.77272	3.29568	3.848	3.1496	2.63867
1.55	4.23565	4.2926	3.20698	4.01846	3.64961	2.62233	3.97902	4.25864	3.0692	3.67162	2.87622	2.90349	3.08999	2.95212	3.42228	3.39201	2.28114	2.81607	3.29699	3.73184	3.15193	2.5527
1.65	4.12771	4.07605	3.58054	4.01883	3.74204	2.66713	3.83966	4.2819	3.26252	3.94425	2.8798	2.81773	3.02493	2.96705	3.19254	3.0359	2.5791	2.73119	3.30466	3.46318	3.22307	2.55142
1.75	4.25643	4.28104	3.36101	4.07417	3.63701	2.62774	3.79998	4.16859	3.10087	4.00496	2.90042	2.77976	3.09009	2.68333	3.33751	3.02039	2.36065	2.77294	3.31151	3.42803	3.04368	2.64887
1.85	4.23276	4.05529	3.24624	3.88252	3.775	2.51056	3.64682	3.99343	2.96225	4.11192	2.93002	2.88134	3.02918	2.88715	3.24331	3.10511	2.43213	2.73424	3.36942	4.02267	2.94721	2.67768
1.95	3.77858	4.1208	3.18688	3.83509	3.70886	2.37258	3.50718	3.82785	3.10082	3.76991	3.27683	2.49939	2.9079	2.83677	3.12319	2.86144	2.50974	2.64184	3.21286	3.97449	3.08	2.57473
2.05	3.06019	3.44624	2.75194	3.33663	3.56165	2.10204	3.58188	3.29416	2.86325	4.18229	3.3812	2.40811	2.65479	2.538	2.74701	2.49631	2.62542	2.43146	2.87074	3.07926	2.90445	2.59107
2.15	2.87583	3.0454	2.54067	3.2203	3.41552	2.01398	3.35056	3.47948	2.67743	4.05994	3.09652	2.36665	2.50885	2.40677	2.71174	2.57282	2.60799	2.47161	2.89451	3.04151	2.84177	2.58558
2.25	2.8571	3.32007	2.52934	3.22404	3.24753	1.92949	3.41023	3.44478	2.62303	3.56081	2.8797	2.39947	2.57424	2.55125	2.69272	2.47908	2.61424	2.42502	2.78599	2.71201	2.88426	2.57438
2.35	2.77742	3.23317	2.54035	3.15122	3.43571	1.97361	3.48539	3.38038	2.55116	3.73311	2.90232	2.42597	2.70335	2.38006	2.63982	2.63234	2.58241	2.41515	2.90297	2.83944	2.77495	2.65077
2.45	2.95044	3.51759	2.42802	3.16872	3.41771	1.9433	3.29035	3.41416	2.51194	3.90968	2.95116	2.41765	2.66477	2.46981	2.74794	2.44325	2.57603	2.42522	2.98268	2.6971	2.85574	2.50869
2.55	3.04682	3.37116	2.49512	3.39463	3.66802	1.94893	3.4462	3.63048	2.59071	3.72128	2.86521	2.21078	2.64163	2.55823	2.6076	2.57246	2.52626	2.48726	2.99696	3.22975	2.97964	2.30789
2.65	2.96051	3.2888	2.60731	3.35313	3.66395	1.98555	3.30866	3.40687	2.78448	3.78637	2.89289	2.39405	2.78438	2.30018	2.6526	2.7966	2.43876	2.51936	3.05654	3.07759	2.9067	2.31504
2.75	2.9385	2.97532	2.51831	3.69096	3.35604	2.05473	3.40703	3.55248	2.63719	3.35091	3.12132	2.3563	2.77241	2.28521	2.83716	2.766	2.43219	2.55823	2.99025	2.81475	2.92555	2.19726
2.85	3.121	3.01101	2.5411	3.8906	3.67204	2.1157	3.36488	3.45113	2.78253	3.77169	3.05268	2.47125	2.8264	2.59692	2.8681	2.76347	2.4612	2.58391	3.12258	3.19952	3.00893	2.1516
2.95	3.52195	3.63341	2.59352	4.22924	3.84334	2.49107	3.81146	3.83139	2.96141	4.52026	3.05374	2.62462	2.96821	2.72645	2.87322	3.07148	2.71265	2.71275	3.06883	3.02817	2.97143	2.45274
3.05	3.97043	3.93065	3.22301	4.20069	3.88311	2.70823	4.15551	4.02562	3.02479	4.08118	3.14732	2.93513	3.2579	3.0103	3.40249	3.33233	2.67273	2.79346	3.41527	3.74004	3.06503	2.53159
3.15	3.95042	4.34556	3.02952	4.09121	4.0091	2.73147	4.0858	4.12205	3.22886	4.20374	2.97947	2.85209	3.21329	3.01613	3.1904	3.14985	2.53966	2.74132	3.38438	3.80754	3.15629	2.55726
3.25	4.08326	4.25257	3.2117	4.13865	3.84254	2.74344	4.14479	4.21451	3.12704	3.93304	2.91474	2.91179	3.11241	3.00585	3.45935	3.22857	2.75648	2.81621	3.3052	3.55563	3.13861	2.58811
3.35	3.94297	4.10146	3.09718	4.16144	3.6234	2.70899	4.0657	4.08083	3.076	4.23197	2.91084	2.70013	3.0724	2.87349	3.2731	3.26527	2.62505	2.80564	3.35462	3.58738	3.24618	2.74842
3.45	4.02517	4.14748	3.31393	4.12772	3.72241	2.6768	3.92819	4.26389	3.00566	3.78353	2.9109	2.91312	3.13446	2.93063	3.20134	2.99731	2.61196	2.77272	3.29568	3.848	3.1496	2.63867
3.55	4.23565	4.2926	3.20698	4.01846	3.64961	2.62233	3.97902	4.25864	3.0692	3.67162	2.87622	2.90349	3.08999	2.95212	3.42228	3.39201	2.28114	2.81607	3.29699	3.73184	3.15193	2.5527
3.65	4.12771	4.07605	3.58054	4.01883	3.74204	2.66713	3.83966	4.2819	3.26252	3.94425	2.8798	2.81773	3.02493	2.96705	3.19254	3.0359	2.5791	2.73119	3.30466	3.46318	3.22307	2.55142
3.75	4.25643	4.28104	3.36101	4.07417	3.63701	2.62774	3.79998	4.16859	3.10087	4.00496	2.90042	2.77976	3.09009	2.68333	3.33751	3.02039	2.36065	2.77294	3.31151	3.42803	3.04368	2.64887
3.85	4.23276	4.05529	3.24624	3.88252	3.775	2.51056	3.64682	3.99343	2.96225	4.11192	2.93002	2.88134	3.02918	2.88715	3.24331	3.10511	2.43213	2.73424	3.36942	4.02267	2.94721	2.67768
3.95	3.77858	4.1208	3.18688	3.83509	3.70886	2.37258	3.50718	3.82785	3.10082	3.76991	3.27683	2.49939	2.9079	2.83677	3.12319	2.86144	2.50974	2.64184	3.21286	3.97449	3.08	2.57473

## Sheet: CA3 State V_{m} s.d.
0	525301	521502	525101	520901	525001	659105	719301	525403	521303	521602	580501	525404	580201	521304	580601	719002	520701	526202	719303	521401	719001	719103	521101	659101	521501	521102	719201	521302	525003	521202	520702	719202
0.05	2.09306	1.9316	2.00792	1.60067	1.55987	1.81626	2.04185	2.12342	2.20868	1.24782	1.95649	1.63602	2.67703	2.44705	1.62973	2.5768	2.15328	1.83012	1.85851	2.08169	1.6459	1.8333	2.50499	1.6551	1.70637	2.70867	2.30842	2.82879	1.93334	2.74125	2.68502	4.40718
0.15	1.68238	2.1563	1.58677	1.55134	1.61303	1.71027	1.58293	1.77679	2.14368	1.41514	2.03626	1.58129	2.40012	2.27503	1.55357	1.95138	2.10172	1.75569	1.83558	2.15	1.35187	2.01785	2.41874	1.6101	1.59524	2.52404	2.35174	2.38836	1.76942	2.87596	2.71519	4.22429
0.25	1.48268	1.93209	1.67179	1.94962	1.61786	1.61996	1.31296	1.57648	1.98954	1.36508	1.9671	1.85721	2.36054	2.31248	1.52854	1.96466	1.9974	1.82652	1.87282	2.13677	1.53051	2.05731	2.64577	1.5981	1.92166	2.51844	2.20469	2.53193	1.84516	2.8239	2.61064	4.0644
0.35	1.59665	2.07264	1.66978	1.52178	1.59249	1.55049	1.34169	1.81124	2.05929	1.47416	1.82361	1.65738	2.32633	2.31557	1.49332	2.04034	2.04286	1.70957	1.95525	2.04071	1.58026	1.88555	2.71061	1.51592	1.90573	2.45989	2.23022	2.30988	1.90538	2.90297	2.83805	4.14406
0.45	1.60346	2.05539	1.62268	1.43242	1.72106	1.56848	1.55672	1.62805	2.04424	1.64958	1.99549	1.56356	2.29289	2.28356	1.46019	1.94376	2.03446	1.80802	2.47366	2.05877	1.27774	1.98374	2.59566	1.53197	1.82487	2.3049	2.25262	2.33737	1.96757	2.87897	2.64329	4.13699
0.55	1.6045	2.0093	1.58694	1.48862	1.72723	1.75905	1.49861	1.73784	2.13263	1.59109	2.03883	1.73671	2.62395	2.27771	1.51902	2.06677	1.96338	1.75109	2.15017	2.16953	1.42334	2.03739	2.82314	1.67871	1.6838	2.40329	2.31315	2.41794	2.02141	3.08386	2.69118	3.99987
0.65	1.63809	2.04723	1.64145	1.45216	1.75821	1.65411	1.62392	1.71166	2.14042	1.66369	1.9357	1.72376	2.51168	2.26239	1.52807	2.13585	1.98348	1.66299	1.7602	2.04206	1.36446	1.96117	2.8206	1.74905	1.61581	2.45764	2.2878	2.38997	1.89396	3.01075	2.64698	4.02186
0.75	1.68886	2.18264	1.77346	1.32163	1.80433	1.69527	1.55857	1.9035	2.22689	1.28544	2.20975	1.65545	2.49032	2.24607	1.46913	2.26494	2.06803	1.67506	1.73018	2.1216	1.32808	2.06675	2.52623	1.85243	1.564	2.39441	2.31495	2.47884	1.92208	3.07958	2.80928	3.95532
0.85	1.68579	2.28539	1.80582	1.64223	1.88897	1.76979	1.52997	1.72301	2.39082	1.26515	2.02885	1.8696	2.66904	2.18438	1.44367	2.2832	2.11146	1.79368	1.92808	2.02494	1.27003	2.25066	2.4168	1.56905	1.57562	2.42396	2.18541	2.23718	1.93631	2.8202	2.66534	3.86413
0.95	2.02133	2.26229	1.81794	1.77809	2.12207	1.86271	1.58468	1.94548	2.43212	1.38964	2.07505	2.00536	2.73812	2.1991	1.55194	2.19098	2.09313	1.82542	2.38289	2.18487	1.17403	2.11051	2.37625	1.64508	1.44708	2.33863	2.14161	2.45947	2.10086	2.93736	2.78728	3.23801
1.05	2.17667	2.2419	1.96298	1.82695	2.1625	2.02359	1.93675	2.03199	2.57805	2.12653	2.0674	1.91492	2.7313	2.13922	1.63365	2.11216	2.22373	2.01214	2.41216	1.95698	1.49753	2.28678	2.58944	1.69598	1.59598	2.47969	2.13996	2.44712	2.16823	2.68612	2.24631	3.00074
1.15	2.22097	2.51593	2.08787	1.9151	2.1538	2.06469	2.0584	2.32123	2.66925	2.07858	2.17591	1.98376	2.51982	2.28807	1.91379	2.22408	2.1158	1.88916	2.4448	2.28026	1.62269	2.13827	1.87248	1.8075	1.88593	2.34394	2.23164	2.47625	2.21398	2.3746	2.48175	2.80364
1.25	2.12306	2.35613	2.14878	1.7777	2.47395	2.09991	1.76299	2.20321	2.62407	1.77069	2.28914	1.86735	2.44163	2.34621	2.07244	2.0832	2.13127	1.7413	2.35433	2.61634	1.59812	2.28241	2.32989	1.75309	1.89353	2.58695	2.2667	2.39183	2.1076	2.30703	2.89347	3.03017
1.35	2.0805	2.39224	1.98099	2.00743	2.38322	2.08626	1.73815	2.04542	2.59949	1.68718	2.2639	1.82476	2.42828	2.27614	1.96098	2.22751	2.1657	1.84022	2.1779	2.04066	1.63135	1.85635	2.24686	1.7731	1.83255	2.64468	2.17222	2.47461	2.1531	2.3754	2.63714	3.20764
1.45	2.14573	2.47598	2.18809	1.89773	2.33162	2.12709	1.84137	2.23468	2.7251	1.90473	2.17484	1.85467	2.56107	2.2129	1.98831	2.16364	2.09991	1.87934	2.26759	1.75069	1.71819	2.14277	2.37594	1.72898	1.80628	2.49853	2.20113	2.25954	2.21453	2.3358	2.32749	3.2074
1.55	2.15147	2.3038	2.10844	1.96216	2.24606	2.10195	1.68298	2.23844	2.58429	1.98118	2.48053	1.88502	2.5339	2.25926	1.88121	2.01428	2.13453	2.03944	1.97098	1.72767	1.87017	2.23552	2.16253	1.88339	1.82562	2.66167	2.27769	2.2007	2.12208	2.37775	2.53724	3.17084
1.65	2.1468	2.48857	2.12757	1.8632	2.237	2.11088	1.61744	2.27453	2.57582	2.08519	2.11788	1.77664	2.59104	2.34131	1.98892	1.96087	2.16583	1.94121	2.08206	2.08913	1.6169	2.26681	2.04533	1.89972	1.84724	2.69395	2.28606	2.23334	2.19531	2.33756	2.43287	3.16223
1.75	2.20093	2.40929	2.11723	1.81659	2.2069	2.07679	1.6333	2.36658	2.67238	1.73083	2.34396	1.72653	2.56638	2.25494	2.01832	2.04809	2.20326	1.93989	2.1446	2.02053	1.85687	2.20308	2.54698	1.82354	1.90166	2.56897	2.20855	2.19623	2.08574	2.07751	2.31534	3.35021
1.85	2.24847	2.32358	2.23259	2.05565	2.14428	2.15118	1.44112	2.04041	2.58708	1.73038	2.1157	1.82803	2.61996	2.28907	2.04198	2.22154	2.16998	1.84631	2.34241	2.3363	1.86365	2.48222	2.45225	1.85102	1.65814	2.51067	2.3666	2.24503	2.14499	2.18298	2.10035	3.54003
1.95	2.24756	2.21414	2.23292	2.0577	1.76522	2.06984	1.66473	2.30609	2.68621	1.7225	2.24072	1.78452	2.77296	2.42468	1.90233	2.34342	2.24795	1.95718	2.54466	2.22108	1.68046	2.02768	3.10685	1.79685	1.87379	2.84217	2.46013	2.52593	2.20912	2.08748	2.6267	4.1072
2.05	2.09306	1.9316	2.00792	1.60067	1.55987	1.81626	2.04185	2.12342	2.20868	1.24782	1.95649	1.63602	2.67703	2.44705	1.62973	2.5768	2.15328	1.83012	1.85851	2.08169	1.6459	1.8333	2.50499	1.6551	1.70637	2.70867	2.30842	2.82879	1.93334	2.74125	2.68502	4.40718
2.15	1.68238	2.1563	1.58677	1.55134	1.61303	1.71027	1.58293	1.77679	2.14368	1.41514	2.03626	1.58129	2.40012	2.27503	1.55357	1.95138	2.10172	1.75569	1.83558	2.15	1.35187	2.01785	2.41874	1.6101	1.59524	2.52404	2.35174	2.38836	1.76942	2.87596	2.71519	4.22429
2.25	1.48268	1.93209	1.67179	1.94962	1.61786	1.61996	1.31296	1.57648	1.98954	1.36508	1.9671	1.85721	2.36054	2.31248	1.52854	1.96466	1.9974	1.82652	1.87282	2.13677	1.53051	2.05731	2.64577	1.5981	1.92166	2.51844	2.20469	2.53193	1.84516	2.8239	2.61064	4.0644
2.35	1.59665	2.07264	1.66978	1.52178	1.59249	1.55049	1.34169	1.81124	2.05929	1.47416	1.82361	1.65738	2.32633	2.31557	1.49332	2.04034	2.04286	1.70957	1.95525	2.04071	1.58026	1.88555	2.71061	1.51592	1.90573	2.45989	2.23022	2.30988	1.90538	2.90297	2.83805	4.14406
2.45	1.60346	2.05539	1.62268	1.43242	1.72106	1.56848	1.55672	1.62805	2.04424	1.64958	1.99549	1.56356	2.29289	2.28356	1.46019	1.94376	2.03446	1.80802	2.47366	2.05877	1.27774	1.98374	2.59566	1.53197	1.82487	2.3049	2.25262	2.33737	1.96757	2.87897	2.64329	4.13699
2.55	1.6045	2.0093	1.58694	1.48862	1.72723	1.75905	1.49861	1.73784	2.13263	1.59109	2.03883	1.73671	2.62395	2.27771	1.51902	2.06677	1.96338	1.75109	2.15017	2.16953	1.42334	2.03739	2.82314	1.67871	1.6838	2.40329	2.31315	2.41794	2.02141	3.08386	2.69118	3.99987
2.65	1.63809	2.04723	1.64145	1.45216	1.75821	1.65411	1.62392	1.71166	2.14042	1.66369	1.9357	1.72376	2.51168	2.26239	1.52807	2.13585	1.98348	1.66299	1.7602	2.04206	1.36446	1.96117	2.8206	1.74905	1.61581	2.45764	2.2878	2.38997	1.89396	3.01075	2.64698	4.02186
2.75	1.68886	2.18264	1.77346	1.32163	1.80433	1.69527	1.55857	1.9035	2.22689	1.28544	2.20975	1.65545	2.49032	2.24607	1.46913	2.26494	2.06803	1.67506	1.73018	2.1216	1.32808	2.06675	2.52623	1.85243	1.564	2.39441	2.31495	2.47884	1.92208	3.07958	2.80928	3.95532
2.85	1.68579	2.28539	1.80582	1.64223	1.88897	1.76979	1.52997	1.72301	2.39082	1.26515	2.02885	1.8696	2.66904	2.18438	1.44367	2.2832	2.11146	1.79368	1.92808	2.02494	1.27003	2.25066	2.4168	1.56905	1.57562	2.42396	2.18541	2.23718	1.93631	2.8202	2.66534	3.86413
2.95	2.02133	2.26229	1.81794	1.77809	2.12207	1.86271	1.58468	1.94548	2.43212	1.38964	2.07505	2.00536	2.73812	2.1991	1.55194	2.19098	2.09313	1.82542	2.38289	2.18487	1.17403	2.11051	2.37625	1.64508	1.44708	2.33863	2.14161	2.45947	2.10086	2.93736	2.78728	3.23801
3.05	2.17667	2.2419	1.96298	1.82695	2.1625	2.02359	1.93675	2.03199	2.57805	2.12653	2.0674	1.91492	2.7313	2.13922	1.63365	2.11216	2.22373	2.01214	2.41216	1.95698	1.49753	2.28678	2.58944	1.69598	1.59598	2.47969	2.13996	2.44712	2.16823	2.68612	2.24631	3.00074
3.15	2.22097	2.51593	2.08787	1.9151	2.1538	2.06469	2.0584	2.32123	2.66925	2.07858	2.17591	1.98376	2.51982	2.28807	1.91379	2.22408	2.1158	1.88916	2.4448	2.28026	1.62269	2.13827	1.87248	1.8075	1.88593	2.34394	2.23164	2.47625	2.21398	2.3746	2.48175	2.80364
3.25	2.12306	2.35613	2.14878	1.7777	2.47395	2.09991	1.76299	2.20321	2.62407	1.77069	2.28914	1.86735	2.44163	2.34621	2.07244	2.0832	2.13127	1.7413	2.35433	2.61634	1.59812	2.28241	2.32989	1.75309	1.89353	2.58695	2.2667	2.39183	2.1076	2.30703	2.89347	3.03017
3.35	2.0805	2.39224	1.98099	2.00743	2.38322	2.08626	1.73815	2.04542	2.59949	1.68718	2.2639	1.82476	2.42828	2.27614	1.96098	2.22751	2.1657	1.84022	2.1779	2.04066	1.63135	1.85635	2.24686	1.7731	1.83255	2.64468	2.17222	2.47461	2.1531	2.3754	2.63714	3.20764
3.45	2.14573	2.47598	2.18809	1.89773	2.33162	2.12709	1.84137	2.23468	2.7251	1.90473	2.17484	1.85467	2.56107	2.2129	1.98831	2.16364	2.09991	1.87934	2.26759	1.75069	1.71819	2.14277	2.37594	1.72898	1.80628	2.49853	2.20113	2.25954	2.21453	2.3358	2.32749	3.2074
3.55	2.15147	2.3038	2.10844	1.96216	2.24606	2.10195	1.68298	2.23844	2.58429	1.98118	2.48053	1.88502	2.5339	2.25926	1.88121	2.01428	2.13453	2.03944	1.97098	1.72767	1.87017	2.23552	2.16253	1.88339	1.82562	2.66167	2.27769	2.2007	2.12208	2.37775	2.53724	3.17084
3.65	2.1468	2.48857	2.12757	1.8632	2.237	2.11088	1.61744	2.27453	2.57582	2.08519	2.11788	1.77664	2.59104	2.34131	1.98892	1.96087	2.16583	1.94121	2.08206	2.08913	1.6169	2.26681	2.04533	1.89972	1.84724	2.69395	2.28606	2.23334	2.19531	2.33756	2.43287	3.16223
3.75	2.20093	2.40929	2.11723	1.81659	2.2069	2.07679	1.6333	2.36658	2.67238	1.73083	2.34396	1.72653	2.56638	2.25494	2.01832	2.04809	2.20326	1.93989	2.1446	2.02053	1.85687	2.20308	2.54698	1.82354	1.90166	2.56897	2.20855	2.19623	2.08574	2.07751	2.31534	3.35021
3.85	2.24847	2.32358	2.23259	2.05565	2.14428	2.15118	1.44112	2.04041	2.58708	1.73038	2.1157	1.82803	2.61996	2.28907	2.04198	2.22154	2.16998	1.84631	2.34241	2.3363	1.86365	2.48222	2.45225	1.85102	1.65814	2.51067	2.3666	2.24503	2.14499	2.18298	2.10035	3.54003
3.95	2.24756	2.21414	2.23292	2.0577	1.76522	2.06984	1.66473	2.30609	2.68621	1.7225	2.24072	1.78452	2.77296	2.42468	1.90233	2.34342	2.24795	1.95718	2.54466	2.22108	1.68046	2.02768	3.10685	1.79685	1.87379	2.84217	2.46013	2.52593	2.20912	2.08748	2.6267	4.1072

## Sheet: CA1 State V_{m} s.d.
0	523101	524302	524303	522902	522402	523201	522503	524401	522802	522703	522701	524304	522202	522403	522002	522702	523002	522001	521701	524301	522101	522401	523001	522201	522502	522501	659203	522203	522301	522801	524305	521801
0.05	1.82197	1.54817	1.91388	1.86255	2.20668	1.34293	1.30979	1.31807	1.64854	1.27088	1.46036	1.54924	1.72316	1.48618	1.89216	2.14593	1.11844	1.01182	1.20599	2.57725	1.28158	1.50681	1.9324	2.13788	1.4999	1.72112	1.91502	3.31544	2.95087	2.37486	3.45437	7.63851
0.15	1.60054	1.31682	1.61548	1.58703	2.07404	1.095	1.15316	1.23869	1.52853	1.00348	1.05693	1.39679	1.2931	1.059	1.22804	1.682	0.974874	0.805124	1.14015	2.40284	1.38956	1.09927	2.09076	1.69899	1.47718	1.9511	1.76655	2.68923	2.73696	2.29723	2.94919	6.57031
0.25	1.76388	1.29624	1.57557	1.46501	1.8128	1.02349	1.10564	1.15809	1.33743	1.21481	0.979322	1.45365	1.1998	1.26381	1.11183	1.47908	0.919752	0.71922	1.11354	2.53017	1.22647	1.32133	1.78989	2.05353	1.7067	1.72207	1.72258	2.20617	2.61349	2.39913	2.72568	5.97958
0.35	1.80482	1.49385	1.41398	1.69602	1.76075	0.995132	1.13684	1.17056	1.38656	1.38391	0.901547	1.42862	1.21529	1.12074	1.07065	1.60061	0.979818	0.773151	1.19354	2.45304	1.24744	0.827263	2.06442	1.67142	1.58378	1.8794	1.63697	2.3761	2.6687	2.52538	2.93974	5.88652
0.45	1.82145	1.30976	1.66675	1.41869	1.89508	0.982531	1.19581	1.31671	1.38169	1.2273	0.949624	1.48698	1.29608	1.13932	1.11107	1.65097	1.01348	0.751143	1.11666	2.09511	1.21329	1.0842	2.28651	1.75034	1.67273	2.156	2.28806	2.4892	2.58379	2.23369	2.79281	5.62627
0.55	1.77515	1.27935	1.42666	1.57323	1.99837	1.05039	1.1972	1.22572	1.51349	1.48429	0.985255	1.71115	1.1226	1.09936	1.06337	1.61729	0.986845	0.681683	1.09918	2.12381	1.24381	0.978948	1.88364	1.90992	1.52093	2.00966	1.94304	2.29511	2.23759	2.01798	2.57204	5.69945
0.65	1.88014	1.38992	1.81381	1.70475	1.84833	1.07087	1.20266	1.23947	1.66584	1.17973	1.00091	1.65375	1.13451	1.13123	1.09085	1.77845	1.05108	0.733413	1.15247	2.10004	1.27102	1.16866	2.54068	1.95887	1.54202	2.13225	1.86016	2.28324	2.19877	2.29683	2.69207	5.72049
0.75	1.64308	1.28335	1.5962	1.69247	2.08643	1.09347	1.27177	1.25268	1.56487	1.34406	0.991909	1.73074	1.14032	1.10778	1.12306	1.55317	1.0533	0.702126	1.128	1.86162	1.29081	1.38956	2.16168	1.69473	1.31314	2.4114	1.94544	2.3723	2.10061	2.5915	2.36942	5.17658
0.85	2.0382	1.51353	1.78755	1.84371	2.15828	1.16627	1.50101	1.28396	1.74038	1.75554	0.998074	1.78499	1.37313	1.28456	1.18012	1.76569	1.00668	0.709489	1.17567	1.97268	1.21343	1.4951	2.42202	2.5577	1.57496	2.25607	1.88856	2.26825	2.18965	2.38582	2.27422	4.98246
0.95	2.2034	1.56712	2.13348	2.18962	2.44336	1.41045	2.01573	1.63964	1.94868	2.11678	1.25475	1.96726	2.15369	1.73988	1.16717	1.81117	1.18281	0.860509	1.35578	2.14391	1.63095	1.48742	2.7278	2.28349	1.67402	2.48736	2.20939	2.18848	2.53026	3.01341	2.14764	4.8801
1.05	2.72381	2.10108	2.46128	2.31396	2.84833	1.87401	2.39445	2.00525	2.3239	2.10614	1.90897	2.26642	2.3806	1.86653	1.68204	2.29657	1.46514	1.27191	1.68024	2.05637	1.78061	1.90847	2.23874	2.50717	2.07978	2.55911	2.4134	2.57299	2.50488	2.58966	2.27848	4.30868
1.15	2.86046	2.26877	2.40455	2.27217	3.03326	2.10654	2.347	2.23603	2.48432	2.63345	1.90399	2.18449	2.54034	1.7946	1.80245	2.25299	1.74662	1.32239	1.88196	2.31897	2.00936	1.8409	2.16604	2.62546	2.09083	2.5526	2.3692	2.47951	2.51767	2.42052	2.12941	3.97949
1.25	2.75118	2.33076	2.47758	2.45747	2.89225	2.16107	2.2552	2.40197	2.33574	2.60987	1.82942	2.31794	2.45125	1.99911	1.77443	2.20451	1.87084	1.35655	1.78287	2.28958	1.99669	1.85458	2.52371	2.24566	2.22142	2.38734	2.2973	2.44522	2.43367	2.82109	2.28546	3.92113
1.35	3.07615	2.10567	2.47672	2.36603	2.93321	2.20632	2.42915	2.451	2.35653	2.95523	2.13113	2.27666	2.36458	2.1103	1.89376	2.26855	1.77868	1.5015	1.74855	2.29157	1.85094	1.84028	2.52125	2.0802	2.04102	2.14511	2.19164	2.51372	2.65592	2.73064	2.37418	4.11397
1.45	3.26858	2.08281	2.44215	2.44108	2.87882	2.02595	2.46065	2.21303	2.49798	2.41988	1.89743	2.26101	2.55373	2.04644	1.87592	2.38875	1.78846	1.65693	1.70463	2.45817	1.98554	1.85946	2.10496	2.48227	2.22078	2.78229	2.054	2.35015	2.49657	2.98714	2.30761	4.18734
1.55	2.76424	2.32665	2.502	2.33469	3.12376	1.87034	2.38794	2.48818	2.57521	2.45848	2.18841	2.53491	2.30017	1.8845	1.82868	2.25131	1.61532	1.54197	1.73436	2.12569	1.96232	2.12257	2.20475	2.10371	2.3124	2.32359	2.19038	2.3343	2.35082	2.28417	2.17195	3.78726
1.65	3.1841	2.06393	2.24558	2.52436	2.85328	1.97617	2.30556	2.48663	2.33143	2.74634	2.01412	2.37077	2.67053	2.07923	1.88074	2.25057	1.80463	1.64157	1.86934	2.57762	2.07732	1.82109	2.24474	2.72753	2.34283	2.3197	2.43059	2.53888	2.49074	2.39263	2.2096	3.82644
1.75	2.96925	2.41127	2.41178	2.43525	2.89349	1.92128	2.2109	2.66577	2.35684	3.13316	1.90661	2.23039	2.36198	2.0131	1.95378	2.26732	1.78228	1.64291	1.79392	2.42766	1.71333	2.40826	2.32783	2.22764	2.18406	2.48828	2.27629	2.47643	2.60475	2.91011	2.1968	4.12699
1.85	2.91377	2.36377	2.70054	2.28732	2.84058	1.96743	2.24485	2.09289	2.27207	3.04961	2.0202	2.4161	2.0781	2.0847	1.85428	2.47216	1.96976	1.73789	1.60886	2.61872	1.71442	2.09356	2.50522	2.65875	2.35044	2.30702	2.32932	2.36797	2.6659	2.5554	2.39285	4.41951
1.95	2.62957	2.46099	2.48041	2.23645	3.26936	1.86938	2.37378	1.72944	2.31613	2.68541	2.02305	2.37123	2.08268	1.89842	1.85599	2.86329	1.68239	1.60394	1.66785	2.80657	1.61447	1.76985	2.20583	2.28887	2.17233	2.36226	2.05124	2.16671	3.06639	2.94153	2.83775	7.25428
2.05	1.82197	1.54817	1.91388	1.86255	2.20668	1.34293	1.30979	1.31807	1.64854	1.27088	1.46036	1.54924	1.72316	1.48618	1.89216	2.14593	1.11844	1.01182	1.20599	2.57725	1.28158	1.50681	1.9324	2.13788	1.4999	1.72112	1.91502	3.31544	2.95087	2.37486	3.45437	7.63851
2.15	1.60054	1.31682	1.61548	1.58703	2.07404	1.095	1.15316	1.23869	1.52853	1.00348	1.05693	1.39679	1.2931	1.059	1.22804	1.682	0.974874	0.805124	1.14015	2.40284	1.38956	1.09927	2.09076	1.69899	1.47718	1.9511	1.76655	2.68923	2.73696	2.29723	2.94919	6.57031
2.25	1.76388	1.29624	1.57557	1.46501	1.8128	1.02349	1.10564	1.15809	1.33743	1.21481	0.979322	1.45365	1.1998	1.26381	1.11183	1.47908	0.919752	0.71922	1.11354	2.53017	1.22647	1.32133	1.78989	2.05353	1.7067	1.72207	1.72258	2.20617	2.61349	2.39913	2.72568	5.97958
2.35	1.80482	1.49385	1.41398	1.69602	1.76075	0.995132	1.13684	1.17056	1.38656	1.38391	0.901547	1.42862	1.21529	1.12074	1.07065	1.60061	0.979818	0.773151	1.19354	2.45304	1.24744	0.827263	2.06442	1.67142	1.58378	1.8794	1.63697	2.3761	2.6687	2.52538	2.93974	5.88652
2.45	1.82145	1.30976	1.66675	1.41869	1.89508	0.982531	1.19581	1.31671	1.38169	1.2273	0.949624	1.48698	1.29608	1.13932	1.11107	1.65097	1.01348	0.751143	1.11666	2.09511	1.21329	1.0842	2.28651	1.75034	1.67273	2.156	2.28806	2.4892	2.58379	2.23369	2.79281	5.62627
2.55	1.77515	1.27935	1.42666	1.57323	1.99837	1.05039	1.1972	1.22572	1.51349	1.48429	0.985255	1.71115	1.1226	1.09936	1.06337	1.61729	0.986845	0.681683	1.09918	2.12381	1.24381	0.978948	1.88364	1.90992	1.52093	2.00966	1.94304	2.29511	2.23759	2.01798	2.57204	5.69945
2.65	1.88014	1.38992	1.81381	1.70475	1.84833	1.07087	1.20266	1.23947	1.66584	1.17973	1.00091	1.65375	1.13451	1.13123	1.09085	1.77845	1.05108	0.733413	1.15247	2.10004	1.27102	1.16866	2.54068	1.95887	1.54202	2.13225	1.86016	2.28324	2.19877	2.29683	2.69207	5.72049
2.75	1.64308	1.28335	1.5962	1.69247	2.08643	1.09347	1.27177	1.25268	1.56487	1.34406	0.991909	1.73074	1.14032	1.10778	1.12306	1.55317	1.0533	0.702126	1.128	1.86162	1.29081	1.38956	2.16168	1.69473	1.31314	2.4114	1.94544	2.3723	2.10061	2.5915	2.36942	5.17658
2.85	2.0382	1.51353	1.78755	1.84371	2.15828	1.16627	1.50101	1.28396	1.74038	1.75554	0.998074	1.78499	1.37313	1.28456	1.18012	1.76569	1.00668	0.709489	1.17567	1.97268	1.21343	1.4951	2.42202	2.5577	1.57496	2.25607	1.88856	2.26825	2.18965	2.38582	2.27422	4.98246
2.95	2.2034	1.56712	2.13348	2.18962	2.44336	1.41045	2.01573	1.63964	1.94868	2.11678	1.25475	1.96726	2.15369	1.73988	1.16717	1.81117	1.18281	0.860509	1.35578	2.14391	1.63095	1.48742	2.7278	2.28349	1.67402	2.48736	2.20939	2.18848	2.53026	3.01341	2.14764	4.8801
3.05	2.72381	2.10108	2.46128	2.31396	2.84833	1.87401	2.39445	2.00525	2.3239	2.10614	1.90897	2.26642	2.3806	1.86653	1.68204	2.29657	1.46514	1.27191	1.68024	2.05637	1.78061	1.90847	2.23874	2.50717	2.07978	2.55911	2.4134	2.57299	2.50488	2.58966	2.27848	4.30868
3.15	2.86046	2.26877	2.40455	2.27217	3.03326	2.10654	2.347	2.23603	2.48432	2.63345	1.90399	2.18449	2.54034	1.7946	1.80245	2.25299	1.74662	1.32239	1.88196	2.31897	2.00936	1.8409	2.16604	2.62546	2.09083	2.5526	2.3692	2.47951	2.51767	2.42052	2.12941	3.97949
3.25	2.75118	2.33076	2.47758	2.45747	2.89225	2.16107	2.2552	2.40197	2.33574	2.60987	1.82942	2.31794	2.45125	1.99911	1.77443	2.20451	1.87084	1.35655	1.78287	2.28958	1.99669	1.85458	2.52371	2.24566	2.22142	2.38734	2.2973	2.44522	2.43367	2.82109	2.28546	3.92113
3.35	3.07615	2.10567	2.47672	2.36603	2.93321	2.20632	2.42915	2.451	2.35653	2.95523	2.13113	2.27666	2.36458	2.1103	1.89376	2.26855	1.77868	1.5015	1.74855	2.29157	1.85094	1.84028	2.52125	2.0802	2.04102	2.14511	2.19164	2.51372	2.65592	2.73064	2.37418	4.11397
3.45	3.26858	2.08281	2.44215	2.44108	2.87882	2.02595	2.46065	2.21303	2.49798	2.41988	1.89743	2.26101	2.55373	2.04644	1.87592	2.38875	1.78846	1.65693	1.70463	2.45817	1.98554	1.85946	2.10496	2.48227	2.22078	2.78229	2.054	2.35015	2.49657	2.98714	2.30761	4.18734
3.55	2.76424	2.32665	2.502	2.33469	3.12376	1.87034	2.38794	2.48818	2.57521	2.45848	2.18841	2.53491	2.30017	1.8845	1.82868	2.25131	1.61532	1.54197	1.73436	2.12569	1.96232	2.12257	2.20475	2.10371	2.3124	2.32359	2.19038	2.3343	2.35082	2.28417	2.17195	3.78726
3.65	3.1841	2.06393	2.24558	2.52436	2.85328	1.97617	2.30556	2.48663	2.33143	2.74634	2.01412	2.37077	2.67053	2.07923	1.88074	2.25057	1.80463	1.64157	1.86934	2.57762	2.07732	1.82109	2.24474	2.72753	2.34283	2.3197	2.43059	2.53888	2.49074	2.39263	2.2096	3.82644
3.75	2.96925	2.41127	2.41178	2.43525	2.89349	1.92128	2.2109	2.66577	2.35684	3.13316	1.90661	2.23039	2.36198	2.0131	1.95378	2.26732	1.78228	1.64291	1.79392	2.42766	1.71333	2.40826	2.32783	2.22764	2.18406	2.48828	2.27629	2.47643	2.60475	2.91011	2.1968	4.12699
3.85	2.91377	2.36377	2.70054	2.28732	2.84058	1.96743	2.24485	2.09289	2.27207	3.04961	2.0202	2.4161	2.0781	2.0847	1.85428	2.47216	1.96976	1.73789	1.60886	2.61872	1.71442	2.09356	2.50522	2.65875	2.35044	2.30702	2.32932	2.36797	2.6659	2.5554	2.39285	4.41951
3.95	2.62957	2.46099	2.48041	2.23645	3.26936	1.86938	2.37378	1.72944	2.31613	2.68541	2.02305	2.37123	2.08268	1.89842	1.85599	2.86329	1.68239	1.60394	1.66785	2.80657	1.61447	1.76985	2.20583	2.28887	2.17233	2.36226	2.05124	2.16671	3.06639	2.94153	2.83775	7.25428

## Sheet: DG State Spikes
0	523502	524002	523501	523701	523801	524203	523301	524102	524001	523302	524003	524202	523601	523401	524201	659201	523402	524101	659202	523901	523702	523602
0.05	0.00779715		0.0214555	0.0195098	0.0468688	0.0305614	0.00669374	0.00957703	0.0470533	0.080368	0.0829033		0.0222803			0.0185252		0.0210458	0.0363473	0.0219262	0.0364866	0.0446833
0.15	0.00459475		0.00613015	0.00573817	0.0396907	0.0371103	0.00334687	0.0210695	0.0371473	0.0141826	0.05852		0.0198047			0.0367676		0.0137255	0.0389748	0.029487	0.0304534	0.0463049
0.25	0.00696174		0.0056193	0.0103287	0.0291347	0.0196466	0.00334687	0.0210695	0.0435862	0	0.0603487		0.00495118			0.0281414		0.027451	0.032625	0.0340234	0.0339009	0.0540524
0.35	0.00543016		0.0107278	0.00803343	0.0439131	0.0174637	0.0200812	0.00383081	0.0193166	0.0236376	0.0603487		0.0173291			0.0391716		0.0228758	0.048828	0.0340234	0.0278677	0.0594576
0.45	0.00877179		0.00510846	0.00459053	0.0388462	0.0196466	0.0133875	0.0114924	0.0267461	0.0520028	0.0798554		0.00742678			0.0302626		0.0173856	0.0507986	0.0370478	0.0241329	0.0583766
0.55	0.0119742		0.0122603	0.0137716	0.0494023	0.0240125	0.0200812	0.0134078	0.0272414	0.0236376	0.0493762		0.0148536			0.0418585		0.029281	0.0536451	0.0499011	0.0422325	0.0645025
0.65	0.0103034		0.0229881	0.012624	0.0515135	0.0283785	0.0234281	0.0114924	0.0297179	0.0236376	0.0737596		0.0148536			0.0459595		0.0384314	0.0571484	0.0400721	0.0399341	0.079457
0.75	0.00863256		0.00970607	0.0241003	0.0409574	0.0305614	0.0368156	0.00957703	0.0341755	0.0141826	0.0694925		0.0222803			0.0511918		0.0649673	0.043135	0.0347795	0.0405087	0.0754931
0.85	0.0161512		0.00715184	0.0355766	0.0481356	0.0240125	0.0133875	0.0325619	0.0376426	0.0236376	0.0566912		0.00990237			0.047515		0.0448366	0.0573674	0.0279748	0.0451055	0.0780156
0.95	0.030214		0.0148145	0.034429	0.0477133	0.0480251	0.0334687	0.0229849	0.051511	0.0756404	0.05852		0.0148536			0.0637776		0.0448366	0.059776	0.0226823	0.0594703	0.0661241
1.05	0.0758356		0.0592861	0.0664653	0.0564136	0.073943	0.0548357	0.0523988	0.0459422	0.0560676	0.0392299		0.0241208			0.0849165		0.0622772	0.0656154	0.0665523	0.0628638	0.0425832
1.15	0.0893937		0.0727943	0.0751347	0.0614004	0.073943	0.0753991	0.0842937	0.0876107	0.104659	0.0271148		0.0530658			0.0627548		0.0603001	0.0713808	0.0729515	0.0628638	0.0351415
1.25	0.0926714		0.087053	0.0982531	0.0620238	0.0507452	0.126808	0.0729026	0.0758581	0.0411162	0.0305762		0.0723624			0.0688987		0.0790821	0.06589	0.0460746	0.0646101	0.0394825
1.35	0.0911815		0.101312	0.0992163	0.0511151	0.0753928	0.0993897	0.111632	0.0769265	0.0747568	0.0299993		0.0627141			0.0616577		0.0701854	0.0455739	0.0499142	0.0715949	0.0411362
1.45	0.0917775		0.101312	0.0732082	0.0489333	0.0869917	0.0719719	0.0865719	0.0582291	0.0672811	0.0288455		0.0675383			0.0583664		0.0711739	0.0450248	0.0652724	0.0646101	0.0336945
1.55	0.0959492		0.0848016	0.0722449	0.05018	0.0811923	0.109671	0.0979629	0.0544896	0.0485919	0.0294224		0.0651262			0.0724094		0.0840247	0.0551829	0.0524739	0.0715949	0.0353482
1.65	0.0914795		0.104313	0.0876571	0.0573486	0.094241	0.0856808	0.0934065	0.0625028	0.104659	0.03173		0.0940711			0.0583664		0.0721624	0.0516138	0.0895896	0.0611176	0.0336945
1.75	0.098333		0.0945575	0.111739	0.0645172	0.0710432	0.102817	0.0911283	0.0641054	0.0598054	0.0224995		0.12784			0.0484924		0.0642542	0.043103	0.0755112	0.0576252	0.0380355
1.85	0.0947573		0.0908053	0.0693551	0.0592187	0.0623441	0.0514085	0.0751808	0.0443396	0.0784946	0.025384		0.154373			0.0526614		0.0533804	0.0444757	0.0767911	0.0497672	0.0334877
1.95	0.0677902		0.0878034	0.0780245	0.0526735	0.0507452	0.0479812	0.0774591	0.0758581	0.0336405	0.0853826		0.130252			0.0283055		0.058323	0.0334941	0.0729515	0.0532596	0.0409295
2.05	0.00779715		0.0214555	0.0195098	0.0468688	0.0305614	0.00669374	0.00957703	0.0470533	0.080368	0.0829033		0.0222803			0.0185252		0.0210458	0.0363473	0.0219262	0.0364866	0.0446833
2.15	0.00459475		0.00613015	0.00573817	0.0396907	0.0371103	0.00334687	0.0210695	0.0371473	0.0141826	0.05852		0.0198047			0.0367676		0.0137255	0.0389748	0.029487	0.0304534	0.0463049
2.25	0.00696174		0.0056193	0.0103287	0.0291347	0.0196466	0.00334687	0.0210695	0.0435862	0	0.0603487		0.00495118			0.0281414		0.027451	0.032625	0.0340234	0.0339009	0.0540524
2.35	0.00543016		0.0107278	0.00803343	0.0439131	0.0174637	0.0200812	0.00383081	0.0193166	0.0236376	0.0603487		0.0173291			0.0391716		0.0228758	0.048828	0.0340234	0.0278677	0.0594576
2.45	0.00877179		0.00510846	0.00459053	0.0388462	0.0196466	0.0133875	0.0114924	0.0267461	0.0520028	0.0798554		0.00742678			0.0302626		0.0173856	0.0507986	0.0370478	0.0241329	0.0583766
2.55	0.0119742		0.0122603	0.0137716	0.0494023	0.0240125	0.0200812	0.0134078	0.0272414	0.0236376	0.0493762		0.0148536			0.0418585		0.029281	0.0536451	0.0499011	0.0422325	0.0645025
2.65	0.0103034		0.0229881	0.012624	0.0515135	0.0283785	0.0234281	0.0114924	0.0297179	0.0236376	0.0737596		0.0148536			0.0459595		0.0384314	0.0571484	0.0400721	0.0399341	0.079457
2.75	0.00863256		0.00970607	0.0241003	0.0409574	0.0305614	0.0368156	0.00957703	0.0341755	0.0141826	0.0694925		0.0222803			0.0511918		0.0649673	0.043135	0.0347795	0.0405087	0.0754931
2.85	0.0161512		0.00715184	0.0355766	0.0481356	0.0240125	0.0133875	0.0325619	0.0376426	0.0236376	0.0566912		0.00990237			0.047515		0.0448366	0.0573674	0.0279748	0.0451055	0.0780156
2.95	0.030214		0.0148145	0.034429	0.0477133	0.0480251	0.0334687	0.0229849	0.051511	0.0756404	0.05852		0.0148536			0.0637776		0.0448366	0.059776	0.0226823	0.0594703	0.0661241
3.05	0.0758356		0.0592861	0.0664653	0.0564136	0.073943	0.0548357	0.0523988	0.0459422	0.0560676	0.0392299		0.0241208			0.0849165		0.0622772	0.0656154	0.0665523	0.0628638	0.0425832
3.15	0.0893937		0.0727943	0.0751347	0.0614004	0.073943	0.0753991	0.0842937	0.0876107	0.104659	0.0271148		0.0530658			0.0627548		0.0603001	0.0713808	0.0729515	0.0628638	0.0351415
3.25	0.0926714		0.087053	0.0982531	0.0620238	0.0507452	0.126808	0.0729026	0.0758581	0.0411162	0.0305762		0.0723624			0.0688987		0.0790821	0.06589	0.0460746	0.0646101	0.0394825
3.35	0.0911815		0.101312	0.0992163	0.0511151	0.0753928	0.0993897	0.111632	0.0769265	0.0747568	0.0299993		0.0627141			0.0616577		0.0701854	0.0455739	0.0499142	0.0715949	0.0411362
3.45	0.0917775		0.101312	0.0732082	0.0489333	0.0869917	0.0719719	0.0865719	0.0582291	0.0672811	0.0288455		0.0675383			0.0583664		0.0711739	0.0450248	0.0652724	0.0646101	0.0336945
3.55	0.0959492		0.0848016	0.0722449	0.05018	0.0811923	0.109671	0.0979629	0.0544896	0.0485919	0.0294224		0.0651262			0.0724094		0.0840247	0.0551829	0.0524739	0.0715949	0.0353482
3.65	0.0914795		0.104313	0.0876571	0.0573486	0.094241	0.0856808	0.0934065	0.0625028	0.104659	0.03173		0.0940711			0.0583664		0.0721624	0.0516138	0.0895896	0.0611176	0.0336945
3.75	0.098333		0.0945575	0.111739	0.0645172	0.0710432	0.102817	0.0911283	0.0641054	0.0598054	0.0224995		0.12784			0.0484924		0.0642542	0.043103	0.0755112	0.0576252	0.0380355
3.85	0.0947573		0.0908053	0.0693551	0.0592187	0.0623441	0.0514085	0.0751808	0.0443396	0.0784946	0.025384		0.154373			0.0526614		0.0533804	0.0444757	0.0767911	0.0497672	0.0334877
3.95	0.0677902		0.0878034	0.0780245	0.0526735	0.0507452	0.0479812	0.0774591	0.0758581	0.0336405	0.0853826		0.130252			0.0283055		0.058323	0.0334941	0.0729515	0.0532596	0.0409295

## Sheet: CA3 State Spikes
0	525301	521502	525101	520901	525001	659105	719301	525403	521303	521602	580501	525404	580201	521304	580601	719002	520701	526202	719303	521401	719001	719103	521101	659101	521501	521102	719201	521302	525003	521202	520702	719202
0.05	0.0238087	0.0154247	0.0146367	0.0658717	0.0173461	0.00595138	0.085961	0.0178655	0.0375572		0.0389316	0.0223129	0.054349	0.0328229	0.0637596	0.0736011	0.053467	0.0179818	0	0.059401		0.0301887	0.0358373			0.0679776	0.045441	0.0627648	0.0337512		0.0662179	0.103667
0.15	0.0128201	0.0172394	0.0250916	0.0247019	0.0141923	0.0178541	0.0707914	0.0133991	0.0452135		0.0464365	0.0605635	0.0422714	0.0382934	0.0398497	0.00841155	0.0492348	0.028257	0	0.0738638		0.0686106	0.00632423			0.0690054	0.0380722	0.0470736	0.0284221		0.0765751	0.0877001
0.25	0.0128201	0.0208687	0.0250916	0.0494037	0.0488846	0.00595138	0	0.0133991	0.041644		0.0581629	0.0563135	0.0430263	0.0574402	0.0637596	0.0294404	0.0409114	0.0513764	0.0406919	0.0707646		0.0850772	0.0695665			0.057113	0.0724599	0.058916	0.0524032		0.0682554	0.0819506
0.35	0.0201458	0.0362934	0.0209096	0.00823396	0.0425769	0.047611	0.0505653	0.0401973	0.0449548		0.0408078	0.0425007	0.0369875	0.0551608	0.0239098	0.0231318	0.0469776	0.0256882	0.0406919	0.0821283		0.0521441	0.115944			0.0621048	0.0650911	0.0790482	0.0737198		0.0696137	0.0732097
0.45	0.0164829	0.0417375	0	0	0.0283846	0.0297569	0.0707914	0.0223318	0.0414888		0.0567557	0.0425007	0.0390633	0.0633665	0.0557896	0.0147202	0.0416168	0.0590829	0.20346	0.0779961		0.0823328	0.0822149			0.054617	0.0614067	0.0677979	0.070167		0.0725002	0.0729183
0.55	0.0219772	0.0417375	0.0230006	0.00823396	0.039423	0.0297569	0.0505653	0.0223318	0.0473862		0.0642606	0.0233754	0.0549151	0.0635945	0.0318798	0.0714982	0.0399239	0.0565141	0.0813839	0.0914259		0.0686106	0.0990795			0.0531488	0.0773724	0.073127	0.100365		0.0694439	0.0666443
0.65	0.0109886	0.0408301	0.00836385	0	0.0488846	0.0535624	0.0556218	0.0803946	0.0509557		0.051127	0.0244379	0.0511409	0.054249	0.0239098	0.0946299	0.0478241	0.0308259	0.0406919	0.0568183		0.0493997	0.0590261			0.0590216	0.0921101	0.073423	0.0586205		0.0767449	0.0666055
0.75	0.0476173	0.0453668	0.0292735	0	0.0678076	0.047611	0.0404522	0.0357309	0.064199		0.0727036	0.055251	0.0562361	0.0619989	0.0478197	0.092527	0.0523384	0.0256882	0.013564	0.0645663		0.0960549	0.0611342			0.0582875	0.108076	0.0763836	0.0834899		0.0787824	0.0571847
0.85	0.0549431	0.0635135	0.0480921	0.0247019	0.0741153	0.0297569	0.0606784	0.0401973	0.0679754		0.050658	0.0541884	0.0592555	0.0804618	0.0318798	0.113556	0.0639065	0.0616517	0.0406919	0.0433885		0.0823328	0.0674584			0.0695927	0.0871975	0.0802324	0.0852662		0.06452	0.0545042
0.95	0.122706	0.0571622	0.0878204	0.131743	0.0488846	0.0714166	0.075848	0.0759283	0.0779079		0.0609772	0.129627	0.0613313	0.0861602	0.0239098	0.0820126	0.0615082	0.0693582	0.0949478	0.0955581		0.0823328	0.0906472			0.049772	0.0724599	0.0497382	0.10303		0.0619732	0.0350218
1.05	0.110685	0.0827283	0.133257	0.131175	0.051255	0.0620859	0.0140617	0.0923745	0.072923		0.0554037	0.101929	0.063787	0.0499581	0.0194601	0.0494119	0.0643805	0.085301	0.0849977	0.0261231		0.0216369	0.0629349			0.0430274	0.028365	0.0297656	0.0751485		0.0320704	0.0259476
1.15	0.10467	0.0636372	0.194042	0.0624645	0.0711876	0.0827812	0.016874	0.14556	0.0566151		0.0478487	0.0654667	0.056593	0.0475073	0.0583803	0.0494119	0.0510107	0.0441212	0.0566651	0.0587771		0.0703198	0.0114427			0.037423	0.050056	0.0316456	0.042377		0.0320704	0.018288
1.25	0.0493271	0.0661827	0.147285	0.0437252	0.13668	0.0532165	0.0281234	0.0391892	0.0493618		0.0470092	0.0472355	0.0498786	0.0537285	0.184871	0.0305883	0.0547131	0.0970666	0.0424989	0.0685732		0.0162276	0.0419566			0.0345304	0.0417133	0.0332122	0.0254262		0.034162	0.0250866
1.35	0.0397023	0.0483643	0.0303921	0.0936968	0.0854251	0.0428688	0.00843702	0.0307915	0.0456134		0.0545643	0.0348051	0.0503582	0.0380813	0.0778404	0.0458824	0.0547131	0.0735353	0.0283326	0.00653078		0.0108184	0.047678			0.0406772	0.050056	0.0360321	0.0288163		0.0357887	0.0261554
1.45	0.0553426	0.0636372	0.0350678	0.0624645	0.0996626	0.0650424	0.0365604	0.0587838	0.0504814		0.0327386	0.0298329	0.0513174	0.031106	0.0778404	0.0305883	0.0390808	0.0382384	0.0283326	0.0195924		0.0162276	0.0209783			0.0417619	0.0166853	0.0266324	0.0248612		0.0255634	0.0253538
1.55	0.0745923	0.0814556	0.0303921	0.112436	0.039865	0.0339994	0.0365604	0.0811776	0.0434715		0.0772294	0.0488929	0.0388477	0.0279011	0.00973004	0.0294118	0.038258	0.0735353	0.0283326	0.00326539		0.0108184	0.0190712			0.0412195	0.0216909	0.0238125	0.0248612		0.0297465	0.0245522
1.65	0.0842171	0.0776374	0.0233785	0.0312323	0.028475	0.0354777	0.0449974	0.0699807	0.0380193		0.0411331	0.0339764	0.0434039	0.0395894	0.0291901	0.0282353	0.0489538	0.0294141	0	0.0261231		0.0324553	0.00953559			0.0444737	0.0317021	0.0244392	0.0186459		0.0267253	0.0227412
1.75	0.0517333	0.0521825	0.016365	0.0312323	0.0313225	0.05026	0.120931	0.0531853	0.0444451		0.0386147	0.0555224	0.0515572	0.0544826	0.0583803	0.0235295	0.046897	0.0764767	0.051943	0.00653078		0.0270461	0.0286068			0.0412195	0.0116797	0.0256925	0.0231661		0.0216127	0.027907
1.85	0.0637643	0.0585462	0.0584463	0.0936968	0.0142375	0.104955	0.0871825	0.0391892	0.0364615		0.0268624	0.0339764	0.0453223	0.0343109	0.0291901	0.0494119	0.0499823	0.0176485	0.0566651	0.0261231		0.0865474	0.0152569			0.031457	0.028365	0.0338388	0.0288163		0.0165	0.0324493
1.95	0.0216558	0.0254549	0.0490949	0.0249858	0.01139	0.130085	0.0449974	0.0279923	0.0433254		0.0377753	0.0372912	0.0503582	0.0297863	0.0486502	0.0600001	0.0543017	0.0382384	0.0661093	0.0424501		0.0108184	0.0553064			0.0435698	0	0.0664244	0.0186459		0.0411338	0.0721129
2.05	0.0238087	0.0154247	0.0146367	0.0658717	0.0173461	0.00595138	0.085961	0.0178655	0.0375572		0.0389316	0.0223129	0.054349	0.0328229	0.0637596	0.0736011	0.053467	0.0179818	0	0.059401		0.0301887	0.0358373			0.0679776	0.045441	0.0627648	0.0337512		0.0662179	0.103667
2.15	0.0128201	0.0172394	0.0250916	0.0247019	0.0141923	0.0178541	0.0707914	0.0133991	0.0452135		0.0464365	0.0605635	0.0422714	0.0382934	0.0398497	0.00841155	0.0492348	0.028257	0	0.0738638		0.0686106	0.00632423			0.0690054	0.0380722	0.0470736	0.0284221		0.0765751	0.0877001
2.25	0.0128201	0.0208687	0.0250916	0.0494037	0.0488846	0.00595138	0	0.0133991	0.041644		0.0581629	0.0563135	0.0430263	0.0574402	0.0637596	0.0294404	0.0409114	0.0513764	0.0406919	0.0707646		0.0850772	0.0695665			0.057113	0.0724599	0.058916	0.0524032		0.0682554	0.0819506
2.35	0.0201458	0.0362934	0.0209096	0.00823396	0.0425769	0.047611	0.0505653	0.0401973	0.0449548		0.0408078	0.0425007	0.0369875	0.0551608	0.0239098	0.0231318	0.0469776	0.0256882	0.0406919	0.0821283		0.0521441	0.115944			0.0621048	0.0650911	0.0790482	0.0737198		0.0696137	0.0732097
2.45	0.0164829	0.0417375	0	0	0.0283846	0.0297569	0.0707914	0.0223318	0.0414888		0.0567557	0.0425007	0.0390633	0.0633665	0.0557896	0.0147202	0.0416168	0.0590829	0.20346	0.0779961		0.0823328	0.0822149			0.054617	0.0614067	0.0677979	0.070167		0.0725002	0.0729183
2.55	0.0219772	0.0417375	0.0230006	0.00823396	0.039423	0.0297569	0.0505653	0.0223318	0.0473862		0.0642606	0.0233754	0.0549151	0.0635945	0.0318798	0.0714982	0.0399239	0.0565141	0.0813839	0.0914259		0.0686106	0.0990795			0.0531488	0.0773724	0.073127	0.100365		0.0694439	0.0666443
2.65	0.0109886	0.0408301	0.00836385	0	0.0488846	0.0535624	0.0556218	0.0803946	0.0509557		0.051127	0.0244379	0.0511409	0.054249	0.0239098	0.0946299	0.0478241	0.0308259	0.0406919	0.0568183		0.0493997	0.0590261			0.0590216	0.0921101	0.073423	0.0586205		0.0767449	0.0666055
2.75	0.0476173	0.0453668	0.0292735	0	0.0678076	0.047611	0.0404522	0.0357309	0.064199		0.0727036	0.055251	0.0562361	0.0619989	0.0478197	0.092527	0.0523384	0.0256882	0.013564	0.0645663		0.0960549	0.0611342			0.0582875	0.108076	0.0763836	0.0834899		0.0787824	0.0571847
2.85	0.0549431	0.0635135	0.0480921	0.0247019	0.0741153	0.0297569	0.0606784	0.0401973	0.0679754		0.050658	0.0541884	0.0592555	0.0804618	0.0318798	0.113556	0.0639065	0.0616517	0.0406919	0.0433885		0.0823328	0.0674584			0.0695927	0.0871975	0.0802324	0.0852662		0.06452	0.0545042
2.95	0.122706	0.0571622	0.0878204	0.131743	0.0488846	0.0714166	0.075848	0.0759283	0.0779079		0.0609772	0.129627	0.0613313	0.0861602	0.0239098	0.0820126	0.0615082	0.0693582	0.0949478	0.0955581		0.0823328	0.0906472			0.049772	0.0724599	0.0497382	0.10303		0.0619732	0.0350218
3.05	0.110685	0.0827283	0.133257	0.131175	0.051255	0.0620859	0.0140617	0.0923745	0.072923		0.0554037	0.101929	0.063787	0.0499581	0.0194601	0.0494119	0.0643805	0.085301	0.0849977	0.0261231		0.0216369	0.0629349			0.0430274	0.028365	0.0297656	0.0751485		0.0320704	0.0259476
3.15	0.10467	0.0636372	0.194042	0.0624645	0.0711876	0.0827812	0.016874	0.14556	0.0566151		0.0478487	0.0654667	0.056593	0.0475073	0.0583803	0.0494119	0.0510107	0.0441212	0.0566651	0.0587771		0.0703198	0.0114427			0.037423	0.050056	0.0316456	0.042377		0.0320704	0.018288
3.25	0.0493271	0.0661827	0.147285	0.0437252	0.13668	0.0532165	0.0281234	0.0391892	0.0493618		0.0470092	0.0472355	0.0498786	0.0537285	0.184871	0.0305883	0.0547131	0.0970666	0.0424989	0.0685732		0.0162276	0.0419566			0.0345304	0.0417133	0.0332122	0.0254262		0.034162	0.0250866
3.35	0.0397023	0.0483643	0.0303921	0.0936968	0.0854251	0.0428688	0.00843702	0.0307915	0.0456134		0.0545643	0.0348051	0.0503582	0.0380813	0.0778404	0.0458824	0.0547131	0.0735353	0.0283326	0.00653078		0.0108184	0.047678			0.0406772	0.050056	0.0360321	0.0288163		0.0357887	0.0261554
3.45	0.0553426	0.0636372	0.0350678	0.0624645	0.0996626	0.0650424	0.0365604	0.0587838	0.0504814		0.0327386	0.0298329	0.0513174	0.031106	0.0778404	0.0305883	0.0390808	0.0382384	0.0283326	0.0195924		0.0162276	0.0209783			0.0417619	0.0166853	0.0266324	0.0248612		0.0255634	0.0253538
3.55	0.0745923	0.0814556	0.0303921	0.112436	0.039865	0.0339994	0.0365604	0.0811776	0.0434715		0.0772294	0.0488929	0.0388477	0.0279011	0.00973004	0.0294118	0.038258	0.0735353	0.0283326	0.00326539		0.0108184	0.0190712			0.0412195	0.0216909	0.0238125	0.0248612		0.0297465	0.0245522
3.65	0.0842171	0.0776374	0.0233785	0.0312323	0.028475	0.0354777	0.0449974	0.0699807	0.0380193		0.0411331	0.0339764	0.0434039	0.0395894	0.0291901	0.0282353	0.0489538	0.0294141	0	0.0261231		0.0324553	0.00953559			0.0444737	0.0317021	0.0244392	0.0186459		0.0267253	0.0227412
3.75	0.0517333	0.0521825	0.016365	0.0312323	0.0313225	0.05026	0.120931	0.0531853	0.0444451		0.0386147	0.0555224	0.0515572	0.0544826	0.0583803	0.0235295	0.046897	0.0764767	0.051943	0.00653078		0.0270461	0.0286068			0.0412195	0.0116797	0.0256925	0.0231661		0.0216127	0.027907
3.85	0.0637643	0.0585462	0.0584463	0.0936968	0.0142375	0.104955	0.0871825	0.0391892	0.0364615		0.0268624	0.0339764	0.0453223	0.0343109	0.0291901	0.0494119	0.0499823	0.0176485	0.0566651	0.0261231		0.0865474	0.0152569			0.031457	0.028365	0.0338388	0.0288163		0.0165	0.0324493
3.95	0.0216558	0.0254549	0.0490949	0.0249858	0.01139	0.130085	0.0449974	0.0279923	0.0433254		0.0377753	0.0372912	0.0503582	0.0297863	0.0486502	0.0600001	0.0543017	0.0382384	0.0661093	0.0424501		0.0108184	0.0553064			0.0435698	0	0.0664244	0.0186459		0.0411338	0.0721129

## Sheet: CA1 State Spikes
0	523101	524302	524303	522902	522402	523201	522503	524401	522802	522703	522701	524304	522202	522403	522002	522702	523002	522001	521701	524301	522101	522401	523001	522201	522502	522501	659203	522203	522301	522801	524305	521801
0.05	0.0150245	0.0249379	0.0274436	0.0224189	0.0342972	0.0222763	0.0096281	0.00976451	0.0206382	0.00553214	0.0330087	0.0249813	0.0308085	0	0.124705	0.0284702	0.00844444	0	0.0157283	0.0588888	0.0074099	0.0532596	0.0223957	0.0331905	0.0214288	0.0257766	0.0253068	0.0595685	0.0553337	0.0344962	0.0992562	0.0883617
0.15	0.0177789	0.0129677	0.0269704	0.0199279	0.0354949	0.012797	0.00656461	0.0181341	0.0236797	0.00316122	0.00183382	0.022942	0.0144981	0	0.0402694	0.0243213	0.00422222	0	0.0168933	0.044509	0.0318626	0	0.0388193	0.0273086	0.0172621	0.0442829	0.0279706	0.0583424	0.0573251	0.0466713	0.0658151	0.0712899
0.25	0.0348066	0.00498758	0.0260241	0.0149459	0.0342972	0.0118491	0.010941	0.00557972	0.0217245	0.0165964	0	0.0249813	0.00543679	0.0554691	0.0155882	0.0300439	0.00281481	0	0.0145632	0.063682	0.0111148	0.0466021	0.0358332	0.0420133	0.044048	0.0310641	0.0472837	0.0547662	0.0573251	0.0629048	0.0754205	0.0656323
0.35	0.046075	0.0389031	0.0146681	0.0323828	0.039959	0.00853134	0.0148798	0.00278986	0.0269383	0.0252898	0	0.0234518	0	0.00554691	0.00779408	0.0386279	0.00281481	0	0.0320391	0.0486175	0.0118558	0	0.0343401	0.0273086	0.0386908	0.0449438	0.0479496	0.0556858	0.0567561	0.0554644	0.0743532	0.0624562
0.45	0.040566	0.00698261	0.0406922	0.0161914	0.0432254	0.00853134	0.0192562	0.0181341	0.0262866	0.0197576	0	0.0300795	0.0181226	0	0.0168872	0.0383418	0	0	0.0267963	0.049987	0.0200067	0.0133149	0.0373262	0.0394925	0.0500004	0.0522141	0.0659307	0.0602837	0.0563294	0.0588464	0.0796896	0.0575182
0.55	0.0330538	0.0159603	0.0231851	0.0240795	0.0436609	0.013271	0.0105034	0.00557972	0.0371488	0.0403056	0.00550145	0.0525117	0.0126859	0	0.00909309	0.0370542	0.0126667	0	0.019806	0.0629973	0.0326035	0	0.0268749	0.0478952	0.0369051	0.0502313	0.0592711	0.0655968	0.0425315	0.0507297	0.0725745	0.0597763
0.65	0.0353075	0.0199503	0.0525213	0.0323828	0.0451852	0.0146929	0.0205691	0.0181341	0.0395385	0.0134352	0.00550145	0.045884	0.0144981	0.0166407	0.0129901	0.0456381	0.0225185	0	0.019806	0.0547803	0.0296396	0	0.0671872	0.0541972	0.046429	0.0449438	0.0426219	0.0632468	0.0425315	0.0723743	0.0675939	0.0567986
0.75	0.027044	0.0159603	0.0350142	0.0311373	0.0480161	0.00616152	0.0223197	0.0125544	0.0414937	0.0300316	0.00366763	0.051492	0.00724906	0.00554691	0.0272793	0.0407739	0.00281481	0	0.0215536	0.0404004	0.0340855	0.0332872	0.0552428	0.0382321	0.0285717	0.0687376	0.0546093	0.061612	0.044523	0.061552	0.060123	0.0517366
0.85	0.0445725	0.0379056	0.043058	0.048159	0.0565088	0.0180106	0.0490158	0.0153442	0.0556146	0.0711275	0.00916908	0.051492	0.027184	0.00554691	0.0389704	0.0503593	0.00844444	0	0.0227186	0.0458785	0.0303806	0.0466021	0.089583	0.0714226	0.0357146	0.0786517	0.0392921	0.0533357	0.053769	0.0703451	0.0622575	0.0447144
0.95	0.0616003	0.0518708	0.0700285	0.0606139	0.0656547	0.0535578	0.079213	0.0306885	0.0773391	0.075079	0.0330087	0.091768	0.0743029	0.0665629	0.00649506	0.0620908	0.0140741	0	0.0559228	0.052726	0.0652071	0.0199723	0.100034	0.0768843	0.0488099	0.0621282	0.0739224	0.055788	0.0571829	0.0703451	0.0369987	0.0442181
1.05	0.0638392	0.0859559	0.0828746	0.0784213	0.0681697	0.0900662	0.101664	0.0680059	0.0871194	0.0671882	0.104593	0.0770553	0.0918564	0.0687856	0.0671931	0.0686269	0.0528167	0.0483871	0.111381	0.0440413	0.0965559	0.127961	0.060564	0.0813681	0.0784015	0.0722626	0.0777112	0.0432208	0.0474883	0.0619495	0.0283205	0.0353519
1.15	0.0690674	0.0859559	0.0742642	0.0779489	0.0654565	0.117979	0.0971183	0.0604497	0.0818494	0.0880397	0.0894547	0.0725521	0.111977	0.0577799	0.10219	0.0641724	0.0932059	0.0591398	0.111381	0.0465579	0.095446	0.0447864	0.0471054	0.0861544	0.0640652	0.0784314	0.0690022	0.0385148	0.0469078	0.0362631	0.0241145	0.0340277
1.25	0.0676916	0.106102	0.0742642	0.0736971	0.0573846	0.116118	0.0669496	0.126567	0.0670276	0.0810892	0.0825736	0.0580416	0.0831082	0.0880455	0.0545944	0.0630588	0.142916	0.0483871	0.0905813	0.0497037	0.103215	0.0255923	0.060564	0.0544448	0.0694413	0.0467063	0.0576135	0.0398152	0.044934	0.0430625	0.0344894	0.0297341
1.35	0.0701681	0.0550655	0.0608106	0.0661384	0.0520938	0.120212	0.0843069	0.128456	0.0643926	0.0787724	0.111474	0.0555398	0.0769844	0.118311	0.0741924	0.0586043	0.10874	0.0537634	0.073807	0.0377497	0.0699198	0.0895729	0.0684149	0.0382909	0.0604811	0.0343688	0.0475646	0.0380814	0.0520166	0.0453289	0.0311245	0.0367162
1.45	0.069893	0.06581	0.054891	0.0689729	0.0511442	0.0848558	0.0781079	0.0793402	0.0655454	0.055604	0.0701875	0.0580416	0.0796089	0.0962998	0.0657932	0.060414	0.079225	0.182796	0.0691101	0.0534787	0.100995	0.0575826	0.0616856	0.0556414	0.0627212	0.0705001	0.0381857	0.0468742	0.0467917	0.0559057	0.0311245	0.0357933
1.55	0.0630137	0.0980434	0.0618869	0.0699178	0.0515512	0.0636418	0.0756283	0.134123	0.0615929	0.0633268	0.127989	0.0545391	0.07436	0.0660341	0.0475951	0.0563771	0.0761182	0.112903	0.0785038	0.0295706	0.082128	0.0895729	0.0336467	0.0430772	0.0622732	0.0414188	0.0462248	0.0442115	0.0424957	0.0256864	0.0291617	0.0325028
1.65	0.0742957	0.0577516	0.0511239	0.0779489	0.0522295	0.0647584	0.0731487	0.103898	0.0563229	0.0803169	0.0935834	0.0540388	0.0909816	0.052277	0.0671931	0.0622236	0.0807785	0.0913978	0.0811877	0.0509621	0.0776886	0.0447864	0.0549563	0.0550431	0.0649612	0.0405376	0.0556037	0.0427874	0.0393607	0.0370186	0.0266381	0.0329041
1.75	0.0643896	0.0805836	0.0565054	0.0708626	0.0507372	0.0588036	0.0590975	0.0887855	0.0535232	0.0725941	0.0715638	0.0480345	0.0769844	0.0935484	0.0895908	0.0519226	0.105633	0.0752688	0.0644133	0.0471871	0.0421738	0.217534	0.0358898	0.0382909	0.0640652	0.0423001	0.0495744	0.0386387	0.0488816	0.0445734	0.0201889	0.0372779
1.85	0.0616379	0.0684961	0.0667302	0.0585798	0.0479562	0.0662471	0.0607506	0.0472263	0.0553348	0.069505	0.0784449	0.0550395	0.0507397	0.104554	0.0447954	0.0554027	0.119614	0.215054	0.0348906	0.0471871	0.0332951	0.0831748	0.0426191	0.0454704	0.0627212	0.0343688	0.0388556	0.0378337	0.044934	0.0324857	0.0277597	0.0436581
1.95	0.0401747	0.06581	0.0570435	0.0552728	0.0569776	0.0476383	0.0603373	0.0264467	0.0368899	0.0432476	0.0784449	0.0475341	0.0586131	0.0990512	0.0867911	0.0634764	0.0621373	0.112903	0.0389164	0.0710952	0.0244164	0.00639806	0.0269173	0.0442738	0.0430088	0.0361313	0.035506	0.0417966	0.0625824	0.0339967	0.0529958	0.0795316
2.05	0.0150245	0.0249379	0.0274436	0.0224189	0.0342972	0.0222763	0.0096281	0.00976451	0.0206382	0.00553214	0.0330087	0.0249813	0.0308085	0	0.124705	0.0284702	0.00844444	0	0.0157283	0.0588888	0.0074099	0.0532596	0.0223957	0.0331905	0.0214288	0.0257766	0.0253068	0.0595685	0.0553337	0.0344962	0.0992562	0.0883617
2.15	0.0177789	0.0129677	0.0269704	0.0199279	0.0354949	0.012797	0.00656461	0.0181341	0.0236797	0.00316122	0.00183382	0.022942	0.0144981	0	0.0402694	0.0243213	0.00422222	0	0.0168933	0.044509	0.0318626	0	0.0388193	0.0273086	0.0172621	0.0442829	0.0279706	0.0583424	0.0573251	0.0466713	0.0658151	0.0712899
2.25	0.0348066	0.00498758	0.0260241	0.0149459	0.0342972	0.0118491	0.010941	0.00557972	0.0217245	0.0165964	0	0.0249813	0.00543679	0.0554691	0.0155882	0.0300439	0.00281481	0	0.0145632	0.063682	0.0111148	0.0466021	0.0358332	0.0420133	0.044048	0.0310641	0.0472837	0.0547662	0.0573251	0.0629048	0.0754205	0.0656323
2.35	0.046075	0.0389031	0.0146681	0.0323828	0.039959	0.00853134	0.0148798	0.00278986	0.0269383	0.0252898	0	0.0234518	0	0.00554691	0.00779408	0.0386279	0.00281481	0	0.0320391	0.0486175	0.0118558	0	0.0343401	0.0273086	0.0386908	0.0449438	0.0479496	0.0556858	0.0567561	0.0554644	0.0743532	0.0624562
2.45	0.040566	0.00698261	0.0406922	0.0161914	0.0432254	0.00853134	0.0192562	0.0181341	0.0262866	0.0197576	0	0.0300795	0.0181226	0	0.0168872	0.0383418	0	0	0.0267963	0.049987	0.0200067	0.0133149	0.0373262	0.0394925	0.0500004	0.0522141	0.0659307	0.0602837	0.0563294	0.0588464	0.0796896	0.0575182
2.55	0.0330538	0.0159603	0.0231851	0.0240795	0.0436609	0.013271	0.0105034	0.00557972	0.0371488	0.0403056	0.00550145	0.0525117	0.0126859	0	0.00909309	0.0370542	0.0126667	0	0.019806	0.0629973	0.0326035	0	0.0268749	0.0478952	0.0369051	0.0502313	0.0592711	0.0655968	0.0425315	0.0507297	0.0725745	0.0597763
2.65	0.0353075	0.0199503	0.0525213	0.0323828	0.0451852	0.0146929	0.0205691	0.0181341	0.0395385	0.0134352	0.00550145	0.045884	0.0144981	0.0166407	0.0129901	0.0456381	0.0225185	0	0.019806	0.0547803	0.0296396	0	0.0671872	0.0541972	0.046429	0.0449438	0.0426219	0.0632468	0.0425315	0.0723743	0.0675939	0.0567986
2.75	0.027044	0.0159603	0.0350142	0.0311373	0.0480161	0.00616152	0.0223197	0.0125544	0.0414937	0.0300316	0.00366763	0.051492	0.00724906	0.00554691	0.0272793	0.0407739	0.00281481	0	0.0215536	0.0404004	0.0340855	0.0332872	0.0552428	0.0382321	0.0285717	0.0687376	0.0546093	0.061612	0.044523	0.061552	0.060123	0.0517366
2.85	0.0445725	0.0379056	0.043058	0.048159	0.0565088	0.0180106	0.0490158	0.0153442	0.0556146	0.0711275	0.00916908	0.051492	0.027184	0.00554691	0.0389704	0.0503593	0.00844444	0	0.0227186	0.0458785	0.0303806	0.0466021	0.089583	0.0714226	0.0357146	0.0786517	0.0392921	0.0533357	0.053769	0.0703451	0.0622575	0.0447144
2.95	0.0616003	0.0518708	0.0700285	0.0606139	0.0656547	0.0535578	0.079213	0.0306885	0.0773391	0.075079	0.0330087	0.091768	0.0743029	0.0665629	0.00649506	0.0620908	0.0140741	0	0.0559228	0.052726	0.0652071	0.0199723	0.100034	0.0768843	0.0488099	0.0621282	0.0739224	0.055788	0.0571829	0.0703451	0.0369987	0.0442181
3.05	0.0638392	0.0859559	0.0828746	0.0784213	0.0681697	0.0900662	0.101664	0.0680059	0.0871194	0.0671882	0.104593	0.0770553	0.0918564	0.0687856	0.0671931	0.0686269	0.0528167	0.0483871	0.111381	0.0440413	0.0965559	0.127961	0.060564	0.0813681	0.0784015	0.0722626	0.0777112	0.0432208	0.0474883	0.0619495	0.0283205	0.0353519
3.15	0.0690674	0.0859559	0.0742642	0.0779489	0.0654565	0.117979	0.0971183	0.0604497	0.0818494	0.0880397	0.0894547	0.0725521	0.111977	0.0577799	0.10219	0.0641724	0.0932059	0.0591398	0.111381	0.0465579	0.095446	0.0447864	0.0471054	0.0861544	0.0640652	0.0784314	0.0690022	0.0385148	0.0469078	0.0362631	0.0241145	0.0340277
3.25	0.0676916	0.106102	0.0742642	0.0736971	0.0573846	0.116118	0.0669496	0.126567	0.0670276	0.0810892	0.0825736	0.0580416	0.0831082	0.0880455	0.0545944	0.0630588	0.142916	0.0483871	0.0905813	0.0497037	0.103215	0.0255923	0.060564	0.0544448	0.0694413	0.0467063	0.0576135	0.0398152	0.044934	0.0430625	0.0344894	0.0297341
3.35	0.0701681	0.0550655	0.0608106	0.0661384	0.0520938	0.120212	0.0843069	0.128456	0.0643926	0.0787724	0.111474	0.0555398	0.0769844	0.118311	0.0741924	0.0586043	0.10874	0.0537634	0.073807	0.0377497	0.0699198	0.0895729	0.0684149	0.0382909	0.0604811	0.0343688	0.0475646	0.0380814	0.0520166	0.0453289	0.0311245	0.0367162
3.45	0.069893	0.06581	0.054891	0.0689729	0.0511442	0.0848558	0.0781079	0.0793402	0.0655454	0.055604	0.0701875	0.0580416	0.0796089	0.0962998	0.0657932	0.060414	0.079225	0.182796	0.0691101	0.0534787	0.100995	0.0575826	0.0616856	0.0556414	0.0627212	0.0705001	0.0381857	0.0468742	0.0467917	0.0559057	0.0311245	0.0357933
3.55	0.0630137	0.0980434	0.0618869	0.0699178	0.0515512	0.0636418	0.0756283	0.134123	0.0615929	0.0633268	0.127989	0.0545391	0.07436	0.0660341	0.0475951	0.0563771	0.0761182	0.112903	0.0785038	0.0295706	0.082128	0.0895729	0.0336467	0.0430772	0.0622732	0.0414188	0.0462248	0.0442115	0.0424957	0.0256864	0.0291617	0.0325028
3.65	0.0742957	0.0577516	0.0511239	0.0779489	0.0522295	0.0647584	0.0731487	0.103898	0.0563229	0.0803169	0.0935834	0.0540388	0.0909816	0.052277	0.0671931	0.0622236	0.0807785	0.0913978	0.0811877	0.0509621	0.0776886	0.0447864	0.0549563	0.0550431	0.0649612	0.0405376	0.0556037	0.0427874	0.0393607	0.0370186	0.0266381	0.0329041
3.75	0.0643896	0.0805836	0.0565054	0.0708626	0.0507372	0.0588036	0.0590975	0.0887855	0.0535232	0.0725941	0.0715638	0.0480345	0.0769844	0.0935484	0.0895908	0.0519226	0.105633	0.0752688	0.0644133	0.0471871	0.0421738	0.217534	0.0358898	0.0382909	0.0640652	0.0423001	0.0495744	0.0386387	0.0488816	0.0445734	0.0201889	0.0372779
3.85	0.0616379	0.0684961	0.0667302	0.0585798	0.0479562	0.0662471	0.0607506	0.0472263	0.0553348	0.069505	0.0784449	0.0550395	0.0507397	0.104554	0.0447954	0.0554027	0.119614	0.215054	0.0348906	0.0471871	0.0332951	0.0831748	0.0426191	0.0454704	0.0627212	0.0343688	0.0388556	0.0378337	0.044934	0.0324857	0.0277597	0.0436581
3.95	0.0401747	0.06581	0.0570435	0.0552728	0.0569776	0.0476383	0.0603373	0.0264467	0.0368899	0.0432476	0.0784449	0.0475341	0.0586131	0.0990512	0.0867911	0.0634764	0.0621373	0.112903	0.0389164	0.0710952	0.0244164	0.00639806	0.0269173	0.0442738	0.0430088	0.0361313	0.035506	0.0417966	0.0625824	0.0339967	0.0529958	0.0795316
