# Supplementary material for: UP-DOWN states and ripples differentially modulate membrane potential dynamics across DG, CA3, and CA1 in awake mice
Source: eLife. 2022 Jul 12;11:e69596. doi: 10.7554/eLife.69596 (PMC9275824; doi:10.7554/eLife.69596)
Supplement: Figure 6—figure supplement 2—source data 1. [file elife-69596-fig6-figsupp2-data1.xls]

## Sheet: DG Ripple V_m slow
0	524201	524202	523701	523302	523502	523901	523301	524203	524102	523801	524002	523401	523601	523402	523501	523702	524101	524003	524001	659202	523602	659201
-4.99984	-0.285149	0.0564553	0.931348	0.495901	0.0122177	-0.862076	-0.29687	0.350821	-0.353075	-0.152784	-0.862246	0.42369	0.18578	0.134628	0.253527	0.0578387	-0.079921	0.0360999	-0.421257	0.419032	-1.04491	0.302227
-4.99936	-0.285387	0.0559997	0.931773	0.495287	0.0127665	-0.86081	-0.297172	0.350861	-0.352719	-0.152835	-0.861448	0.423009	0.185461	0.135105	0.254095	0.0574605	-0.0801232	0.0365174	-0.420793	0.419379	-1.04523	0.301743
-4.99888	-0.284993	0.0553999	0.931883	0.494965	0.0133124	-0.860971	-0.297219	0.350811	-0.351972	-0.152339	-0.860611	0.422568	0.185065	0.135519	0.254822	0.0579531	-0.0802398	0.036752	-0.42038	0.419325	-1.04478	0.301719
-4.9984	-0.285308	0.0553712	0.931439	0.493908	0.0139915	-0.859756	-0.29743	0.350615	-0.351466	-0.152058	-0.859171	0.422389	0.185053	0.135682	0.255673	0.0578844	-0.0801969	0.0367346	-0.420115	0.419135	-1.04419	0.301257
-4.99792	-0.285295	0.0554951	0.932099	0.493887	0.0146099	-0.859051	-0.297439	0.350673	-0.351126	-0.152331	-0.85803	0.42204	0.184711	0.135889	0.25562	0.0583109	-0.0804946	0.0370072	-0.4199	0.419523	-1.04376	0.300807
-4.99744	-0.285378	0.0553517	0.932225	0.492778	0.0152824	-0.859012	-0.29769	0.350734	-0.349863	-0.152089	-0.856584	0.421356	0.184699	0.136204	0.256493	0.0584042	-0.0806705	0.0372532	-0.419744	0.419708	-1.04344	0.300827
-4.99696	-0.285283	0.0548167	0.931798	0.491168	0.0154687	-0.8592	-0.298179	0.350804	-0.348814	-0.152183	-0.854739	0.421474	0.184645	0.136396	0.256995	0.0585593	-0.0809238	0.0377373	-0.419364	0.419854	-1.04272	0.300171
-4.99648	-0.285652	0.0547281	0.931954	0.490581	0.0155488	-0.860071	-0.298304	0.350765	-0.347717	-0.15208	-0.853211	0.420231	0.184602	0.136363	0.25795	0.0586844	-0.0814238	0.0378227	-0.419181	0.420269	-1.04127	0.29994
-4.996	-0.286498	0.0542537	0.932306	0.490302	0.016279	-0.860211	-0.299073	0.350881	-0.347302	-0.151925	-0.853196	0.419254	0.184687	0.136604	0.258595	0.0586209	-0.0818073	0.0381179	-0.418751	0.420715	-1.04141	0.299819
-4.99552	-0.287019	0.0534106	0.932953	0.489811	0.0159902	-0.859915	-0.298928	0.350658	-0.347146	-0.151398	-0.85178	0.418318	0.18448	0.136548	0.258744	0.0583394	-0.082165	0.0383401	-0.418352	0.420912	-1.04098	0.299603
-4.99504	-0.286959	0.0527247	0.933181	0.490385	0.0164334	-0.859568	-0.299131	0.350689	-0.346586	-0.151257	-0.851182	0.418227	0.184445	0.136881	0.258892	0.0588536	-0.0826649	0.0379859	-0.418059	0.421196	-1.04043	0.298963
-4.99456	-0.287273	0.0526488	0.932995	0.488765	0.0166952	-0.859529	-0.298828	0.350478	-0.34612	-0.150983	-0.849549	0.418245	0.184571	0.137194	0.259478	0.0587891	-0.0828037	0.0380949	-0.417693	0.421129	-1.03983	0.298854
-4.99408	-0.286804	0.0521577	0.933488	0.488164	0.0171352	-0.85961	-0.299048	0.350546	-0.345516	-0.150379	-0.848772	0.417767	0.184511	0.136841	0.259982	0.058632	-0.0829847	0.0379759	-0.41733	0.421264	-1.03939	0.298343
-4.9936	-0.287093	0.0519154	0.933536	0.488919	0.0173562	-0.859258	-0.298702	0.350376	-0.344375	-0.149706	-0.84828	0.416545	0.184398	0.136358	0.259894	0.05898	-0.0830946	0.0384159	-0.417025	0.421153	-1.03882	0.29781
-4.99312	-0.287856	0.0516078	0.933721	0.487672	0.0173959	-0.859351	-0.298079	0.350557	-0.343837	-0.149657	-0.847081	0.415633	0.184642	0.13626	0.260243	0.0585879	-0.0831062	0.0388268	-0.416803	0.421312	-1.03835	0.29722
-4.99264	-0.28809	0.0511633	0.93411	0.488671	0.0179241	-0.859539	-0.298461	0.350398	-0.342728	-0.149061	-0.84565	0.415057	0.184396	0.13648	0.260491	0.0576227	-0.0833449	0.0388132	-0.416465	0.421322	-1.0379	0.297162
-4.99216	-0.287867	0.0505799	0.934919	0.488246	0.0182468	-0.859809	-0.298352	0.350341	-0.342102	-0.148499	-0.844818	0.414528	0.184124	0.136185	0.260644	0.0571106	-0.0835997	0.0387537	-0.416392	0.421384	-1.03695	0.296546
-4.99168	-0.288297	0.0504134	0.934541	0.487625	0.0185992	-0.860283	-0.29832	0.350412	-0.342202	-0.147903	-0.843312	0.413252	0.18386	0.137152	0.260861	0.0569126	-0.0838665	0.0390336	-0.41595	0.421333	-1.03657	0.296276
-4.9912	-0.288454	0.0499781	0.934628	0.486961	0.0187231	-0.86049	-0.298788	0.350089	-0.34142	-0.147743	-0.842732	0.41202	0.183726	0.137824	0.261271	0.0571695	-0.0839921	0.0390613	-0.415412	0.421859	-1.03587	0.295736
-4.99072	-0.289698	0.0500659	0.934318	0.485483	0.0192552	-0.860467	-0.299185	0.350033	-0.340948	-0.147552	-0.841987	0.411163	0.183848	0.13834	0.261535	0.0571159	-0.0844789	0.0391625	-0.414741	0.421913	-1.03632	0.29513
-4.99024	-0.289803	0.0488041	0.933825	0.484289	0.0196133	-0.861561	-0.298103	0.34982	-0.340099	-0.146678	-0.840498	0.409485	0.183592	0.138345	0.261877	0.0566992	-0.0850941	0.0394432	-0.414729	0.421731	-1.03621	0.294956
-4.98976	-0.290838	0.048961	0.933977	0.482918	0.0199994	-0.862125	-0.297837	0.349623	-0.339532	-0.146613	-0.838654	0.408869	0.183498	0.138952	0.262548	0.0565572	-0.0853363	0.0392533	-0.414691	0.421656	-1.03608	0.294505
-4.98928	-0.290647	0.0484993	0.9344	0.481851	0.020412	-0.86261	-0.296839	0.349655	-0.338086	-0.146262	-0.837415	0.408186	0.183684	0.139209	0.263146	0.0559256	-0.0854298	0.0395701	-0.41453	0.42177	-1.03573	0.294105
-4.9888	-0.290213	0.0481685	0.93426	0.481212	0.0212279	-0.863484	-0.296847	0.349609	-0.337589	-0.146066	-0.836459	0.40764	0.183773	0.139578	0.263402	0.0553844	-0.0856762	0.0394366	-0.414669	0.421924	-1.0353	0.293704
-4.98832	-0.290682	0.0485764	0.934273	0.480408	0.0216499	-0.86347	-0.296564	0.349601	-0.33741	-0.145855	-0.835492	0.407039	0.183901	0.139801	0.264041	0.0547421	-0.0857257	0.0395305	-0.414631	0.42211	-1.03505	0.293069
-4.98784	-0.290504	0.0491877	0.934727	0.480269	0.0222592	-0.862971	-0.296117	0.349494	-0.336635	-0.145853	-0.834632	0.406522	0.184133	0.139915	0.264534	0.0548664	-0.0860502	0.0394377	-0.414397	0.421937	-1.03452	0.292946
-4.98736	-0.29012	0.0497988	0.934581	0.47941	0.0225548	-0.862197	-0.296132	0.349504	-0.335974	-0.145297	-0.834396	0.405311	0.184466	0.13985	0.264872	0.0548336	-0.0862283	0.0394149	-0.414229	0.422244	-1.03402	0.292865
-4.98688	-0.290339	0.0491319	0.935023	0.478739	0.0231226	-0.861131	-0.295894	0.349509	-0.335167	-0.144745	-0.834028	0.404941	0.184173	0.139712	0.265047	0.0547254	-0.0865903	0.0397333	-0.414344	0.422626	-1.03349	0.292165
-4.9864	-0.290138	0.0487578	0.935673	0.478012	0.0232858	-0.861165	-0.295785	0.349663	-0.334024	-0.14425	-0.833624	0.404631	0.184233	0.139975	0.265495	0.0543351	-0.0870018	0.0399351	-0.414125	0.422631	-1.03308	0.291697
-4.98592	-0.290307	0.0487106	0.935601	0.477773	0.0234838	-0.861321	-0.295585	0.349743	-0.333725	-0.143814	-0.832789	0.403903	0.184239	0.140127	0.266104	0.0539334	-0.0870855	0.0398486	-0.413958	0.422536	-1.03145	0.291319
-4.98544	-0.291213	0.0484342	0.935984	0.476193	0.0241426	-0.861235	-0.294822	0.349625	-0.333028	-0.143916	-0.831629	0.403221	0.18442	0.140358	0.266341	0.05379	-0.0874752	0.0400586	-0.413945	0.422623	-1.0311	0.291183
-4.98496	-0.291017	0.0479005	0.93602	0.475345	0.0249589	-0.862513	-0.294213	0.349825	-0.331996	-0.143744	-0.829724	0.402517	0.184615	0.140864	0.267583	0.0532106	-0.087758	0.0402269	-0.413869	0.422609	-1.03021	0.290827
-4.98448	-0.29063	0.0478	0.935896	0.47487	0.0257124	-0.86345	-0.293667	0.349694	-0.332056	-0.143146	-0.827589	0.402386	0.184686	0.141132	0.268195	0.052439	-0.0883798	0.0403451	-0.413758	0.422678	-1.03044	0.2905
-4.984	-0.290261	0.0470349	0.936143	0.474522	0.0264345	-0.864086	-0.29331	0.349552	-0.330935	-0.142622	-0.825744	0.402156	0.184559	0.141571	0.268309	0.0516396	-0.0887816	0.0406385	-0.413464	0.422844	-1.02973	0.290152
-4.98352	-0.289692	0.0466168	0.936301	0.475221	0.0268158	-0.863609	-0.292936	0.34958	-0.330393	-0.142862	-0.824704	0.401917	0.184817	0.141828	0.268967	0.0518593	-0.0888037	0.0410246	-0.413357	0.422685	-1.02928	0.289514
-4.98304	-0.289504	0.0458238	0.936334	0.474665	0.0274299	-0.862689	-0.293	0.349421	-0.330222	-0.142036	-0.823393	0.401624	0.184863	0.1423	0.269339	0.0520903	-0.0890755	0.0410172	-0.41361	0.422439	-1.02935	0.289044
-4.98256	-0.289725	0.0456017	0.936744	0.474295	0.0274626	-0.86184	-0.292165	0.34929	-0.329064	-0.141846	-0.822764	0.40144	0.18498	0.142941	0.270032	0.0519472	-0.0890518	0.0412775	-0.41376	0.422185	-1.02827	0.288448
-4.98208	-0.289427	0.0454026	0.936877	0.474569	0.0282875	-0.861098	-0.291998	0.34919	-0.328509	-0.141169	-0.822325	0.400892	0.184776	0.143359	0.270028	0.0521302	-0.0892307	0.0412096	-0.413685	0.422195	-1.02775	0.288107
-4.9816	-0.289381	0.0458717	0.936726	0.474602	0.0289553	-0.860752	-0.292407	0.34901	-0.328046	-0.140966	-0.820916	0.400569	0.184629	0.143848	0.270363	0.0518638	-0.0894968	0.0414909	-0.413332	0.422082	-1.02607	0.287506
-4.98112	-0.289414	0.0455215	0.937458	0.475397	0.0294495	-0.861404	-0.291659	0.349074	-0.328335	-0.141101	-0.81927	0.400713	0.184222	0.144496	0.270432	0.052208	-0.0895658	0.0415689	-0.41325	0.422119	-1.02531	0.287377
-4.98064	-0.289887	0.045276	0.9375	0.47467	0.0300916	-0.861618	-0.291466	0.34908	-0.32815	-0.140613	-0.818127	0.400527	0.184093	0.145219	0.271166	0.0529922	-0.0898153	0.0416125	-0.413058	0.422082	-1.02505	0.287267
-4.98016	-0.289946	0.0446574	0.937935	0.474825	0.0306664	-0.861872	-0.291683	0.348834	-0.326829	-0.14023	-0.816585	0.400577	0.184214	0.145582	0.271357	0.0531555	-0.0898429	0.0414682	-0.412625	0.422235	-1.02494	0.286867
-4.97968	-0.289923	0.0442685	0.937916	0.474796	0.0309314	-0.86228	-0.292006	0.348617	-0.326354	-0.139542	-0.815926	0.400597	0.18417	0.14587	0.271176	0.0528664	-0.0899161	0.0418693	-0.412716	0.422035	-1.02527	0.286497
-4.9792	-0.290673	0.0436188	0.937727	0.474692	0.03138	-0.861417	-0.292056	0.348497	-0.325438	-0.138775	-0.814778	0.399848	0.184178	0.146172	0.270844	0.0529641	-0.0902181	0.0420542	-0.4128	0.422557	-1.02533	0.286283
-4.97872	-0.291302	0.0433239	0.937676	0.474528	0.032018	-0.860372	-0.291584	0.348113	-0.326014	-0.138424	-0.814428	0.399797	0.183859	0.146433	0.270821	0.0525952	-0.0904729	0.0420067	-0.412895	0.422306	-1.02476	0.285823
-4.97824	-0.292104	0.0432937	0.937492	0.474743	0.0328243	-0.860648	-0.292082	0.347932	-0.325608	-0.137595	-0.81359	0.400087	0.183778	0.146704	0.270628	0.051907	-0.0905821	0.0420902	-0.412789	0.422106	-1.02451	0.286124
-4.97776	-0.292553	0.0428537	0.938443	0.473931	0.0336331	-0.860689	-0.292084	0.347723	-0.326195	-0.136778	-0.812198	0.400383	0.184267	0.146811	0.271354	0.0515747	-0.0908284	0.0421022	-0.412821	0.422173	-1.02454	0.285617
-4.97728	-0.292618	0.0426826	0.939045	0.474423	0.0337915	-0.860434	-0.291596	0.347557	-0.325941	-0.136214	-0.810719	0.400435	0.184272	0.147148	0.27194	0.0521203	-0.0912084	0.0418513	-0.412795	0.422507	-1.02387	0.285451
-4.9768	-0.291942	0.0426374	0.939338	0.474888	0.0346763	-0.861262	-0.291113	0.34746	-0.325737	-0.135473	-0.809679	0.400174	0.184188	0.147018	0.272478	0.0522042	-0.0915938	0.0419169	-0.412572	0.42233	-1.02343	0.285515
-4.97632	-0.291472	0.0417432	0.939175	0.474611	0.0354993	-0.861258	-0.290807	0.347444	-0.325866	-0.134999	-0.808515	0.399467	0.184047	0.147124	0.273364	0.052166	-0.0917979	0.0417903	-0.412283	0.422549	-1.02405	0.284872
-4.97584	-0.291614	0.041141	0.938547	0.475121	0.0361008	-0.861317	-0.290435	0.347282	-0.3253	-0.134855	-0.806186	0.399654	0.183657	0.14697	0.273531	0.0518002	-0.0921243	0.0420181	-0.412272	0.422536	-1.02371	0.28436
-4.97536	-0.291064	0.0407805	0.938573	0.474777	0.0368267	-0.860739	-0.290588	0.34703	-0.32538	-0.134648	-0.803747	0.398745	0.183366	0.146783	0.273776	0.0515421	-0.0921008	0.0423861	-0.412604	0.422308	-1.02361	0.284495
-4.97488	-0.290707	0.0407229	0.938902	0.474571	0.0371803	-0.859701	-0.290245	0.346928	-0.325391	-0.134003	-0.802578	0.399109	0.183342	0.14675	0.274184	0.0519633	-0.0923283	0.0426167	-0.412372	0.422182	-1.02387	0.284178
-4.9744	-0.2908	0.0407445	0.938855	0.475117	0.037806	-0.859285	-0.290011	0.346837	-0.325352	-0.133521	-0.801593	0.399004	0.183416	0.146754	0.274854	0.0521829	-0.0924065	0.0426548	-0.412071	0.422066	-1.02352	0.284242
-4.97392	-0.290757	0.0401906	0.938375	0.474797	0.0380962	-0.859114	-0.289806	0.346766	-0.32464	-0.132908	-0.800328	0.398238	0.183467	0.146591	0.274885	0.052139	-0.0924914	0.0428363	-0.412154	0.422012	-1.02342	0.284273
-4.97344	-0.290861	0.0396693	0.938504	0.475419	0.0384312	-0.858641	-0.289626	0.346443	-0.324526	-0.131783	-0.798859	0.398488	0.183373	0.14712	0.27526	0.0515749	-0.0923649	0.0429677	-0.412534	0.422158	-1.02329	0.283525
-4.97296	-0.291122	0.0392221	0.938048	0.475315	0.0389148	-0.858187	-0.288817	0.346332	-0.324508	-0.130876	-0.798025	0.398149	0.183424	0.147214	0.275224	0.0516249	-0.0923732	0.0431682	-0.412395	0.422222	-1.02374	0.283319
-4.97248	-0.290959	0.0389061	0.938562	0.47473	0.039528	-0.85726	-0.288346	0.346079	-0.324509	-0.130531	-0.796371	0.396948	0.183263	0.147163	0.275456	0.0510063	-0.092573	0.0439416	-0.412242	0.422225	-1.02383	0.282848
-4.972	-0.290261	0.0386604	0.938029	0.474981	0.0399834	-0.858149	-0.288373	0.345883	-0.324898	-0.12965	-0.795523	0.39679	0.183146	0.14716	0.275276	0.0509408	-0.0930336	0.0439686	-0.412265	0.422105	-1.0237	0.282595
-4.97152	-0.289558	0.0384767	0.938563	0.475396	0.0410829	-0.858034	-0.287966	0.345699	-0.32521	-0.129003	-0.794135	0.396966	0.183212	0.147571	0.275255	0.0509223	-0.0930472	0.0442692	-0.412064	0.422064	-1.02382	0.282433
-4.97104	-0.288584	0.0381706	0.939013	0.474667	0.0417009	-0.858262	-0.287759	0.345448	-0.325471	-0.128538	-0.79213	0.396498	0.183087	0.147643	0.275937	0.0504651	-0.093083	0.0446384	-0.412095	0.422149	-1.02401	0.282624
-4.97056	-0.287776	0.0376438	0.939369	0.474784	0.0423806	-0.858637	-0.287444	0.345136	-0.325349	-0.127708	-0.791046	0.3965	0.183179	0.148069	0.276265	0.0502523	-0.092902	0.0448901	-0.412217	0.421665	-1.02411	0.282423
-4.97008	-0.287557	0.0372538	0.93923	0.474704	0.0427419	-0.858705	-0.28702	0.344735	-0.326618	-0.127348	-0.789198	0.396095	0.18353	0.148264	0.276271	0.0498409	-0.0928808	0.0449955	-0.412219	0.421687	-1.02434	0.282256
-4.9696	-0.286854	0.0371484	0.939604	0.475416	0.0430984	-0.858421	-0.28748	0.34433	-0.326679	-0.127068	-0.78811	0.39627	0.183544	0.148534	0.276517	0.0495715	-0.0927183	0.0452295	-0.411849	0.421788	-1.02389	0.281889
-4.96912	-0.286596	0.0369413	0.939636	0.474711	0.0433718	-0.858792	-0.28825	0.343972	-0.326754	-0.126647	-0.786926	0.396011	0.183519	0.148781	0.276384	0.0494454	-0.0928809	0.04558	-0.411578	0.422006	-1.02401	0.281843
-4.96864	-0.286002	0.0368636	0.940615	0.475645	0.0440839	-0.858508	-0.288564	0.343833	-0.327939	-0.12581	-0.785089	0.395591	0.183614	0.149045	0.276473	0.0491329	-0.0928812	0.0457326	-0.411628	0.421815	-1.0242	0.281626
-4.96816	-0.285917	0.0367841	0.941289	0.475873	0.0442579	-0.858044	-0.288278	0.343539	-0.327883	-0.125499	-0.785093	0.395343	0.183671	0.149291	0.276971	0.0498083	-0.0928435	0.0462597	-0.411436	0.421754	-1.02383	0.281568
-4.96768	-0.284781	0.0364101	0.942024	0.47671	0.044557	-0.858156	-0.288061	0.343357	-0.327627	-0.125024	-0.783142	0.395328	0.183719	0.148985	0.277186	0.0492412	-0.0929875	0.0462765	-0.411092	0.421815	-1.02395	0.281159
-4.9672	-0.283923	0.0356244	0.942536	0.477111	0.04486	-0.858533	-0.287329	0.343053	-0.327951	-0.124428	-0.782213	0.395467	0.18416	0.149375	0.277131	0.049226	-0.0930477	0.046872	-0.411112	0.421612	-1.02418	0.280999
-4.96672	-0.283113	0.035677	0.94279	0.478031	0.0446726	-0.857707	-0.286674	0.342772	-0.328575	-0.12412	-0.779837	0.394923	0.184008	0.149203	0.276674	0.0496705	-0.0927533	0.0467372	-0.410942	0.421302	-1.02449	0.281
-4.96624	-0.282379	0.0357532	0.943994	0.477927	0.0450019	-0.858186	-0.286374	0.34248	-0.328985	-0.123411	-0.77825	0.395208	0.184002	0.149047	0.276617	0.049482	-0.0927475	0.0469236	-0.41076	0.420803	-1.02487	0.280663
-4.96576	-0.281344	0.035285	0.94492	0.479067	0.0456056	-0.858426	-0.286739	0.342225	-0.329089	-0.123426	-0.776885	0.395602	0.184031	0.149232	0.276236	0.0496368	-0.0927699	0.0471728	-0.410797	0.420935	-1.02528	0.280157
-4.96528	-0.280998	0.0347174	0.945722	0.479756	0.0460444	-0.858413	-0.286692	0.34192	-0.329176	-0.122497	-0.775267	0.396096	0.183944	0.148877	0.276274	0.0496328	-0.0926291	0.0475578	-0.410471	0.420726	-1.02597	0.279784
-4.9648	-0.280417	0.0344608	0.946418	0.479884	0.0465926	-0.858238	-0.286255	0.341632	-0.329401	-0.122241	-0.774542	0.396199	0.184229	0.148844	0.276775	0.0502395	-0.0924576	0.0477658	-0.410673	0.420457	-1.02579	0.279387
-4.96432	-0.279769	0.0338461	0.947222	0.479364	0.0469916	-0.858418	-0.285665	0.341307	-0.328408	-0.12192	-0.773324	0.396208	0.184566	0.148839	0.276668	0.0503745	-0.0927212	0.0479707	-0.410512	0.420254	-1.02494	0.279007
-4.96384	-0.278846	0.0334896	0.947719	0.48024	0.0469692	-0.85838	-0.284792	0.341036	-0.327488	-0.121264	-0.772225	0.397159	0.184588	0.148606	0.276664	0.0500398	-0.0922637	0.0483383	-0.410885	0.420148	-1.02483	0.278353
-4.96336	-0.277682	0.0334621	0.948382	0.480994	0.04735	-0.857813	-0.284746	0.340849	-0.327852	-0.120773	-0.771337	0.397329	0.184542	0.148921	0.276596	0.0500616	-0.0922559	0.0483128	-0.410749	0.420269	-1.02412	0.277916
-4.96288	-0.277121	0.0328646	0.948526	0.479905	0.0476508	-0.858005	-0.283778	0.34084	-0.32803	-0.120464	-0.769746	0.397381	0.184576	0.149527	0.276656	0.0500133	-0.0922782	0.0487903	-0.41055	0.420193	-1.02372	0.277632
-4.9624	-0.276786	0.032409	0.949111	0.479264	0.0479192	-0.857783	-0.28348	0.34061	-0.328768	-0.120137	-0.767806	0.397063	0.184797	0.14958	0.276624	0.050121	-0.0921808	0.0489905	-0.410602	0.420005	-1.02359	0.277253
-4.96192	-0.277098	0.0320444	0.949335	0.479769	0.0481372	-0.857858	-0.283755	0.340335	-0.328855	-0.12019	-0.766683	0.396959	0.184951	0.150331	0.27678	0.0496932	-0.0920524	0.0491382	-0.410393	0.41986	-1.02355	0.27673
-4.96144	-0.276965	0.0320404	0.949511	0.480202	0.0485879	-0.857078	-0.283528	0.339948	-0.329347	-0.120175	-0.764998	0.396903	0.184689	0.149975	0.276961	0.0495243	-0.0920648	0.0492959	-0.41019	0.41959	-1.02359	0.276223
-4.96096	-0.276733	0.0316712	0.94947	0.480051	0.0488235	-0.857086	-0.283019	0.33968	-0.329226	-0.119808	-0.763158	0.39761	0.184773	0.149996	0.276432	0.0494076	-0.092228	0.0496782	-0.409969	0.419391	-1.02337	0.2761
-4.96048	-0.277008	0.0312461	0.949611	0.479923	0.0490753	-0.855963	-0.28281	0.339629	-0.329172	-0.119626	-0.761945	0.39748	0.184882	0.150411	0.27571	0.0495055	-0.092154	0.0498091	-0.410061	0.419115	-1.02282	0.275319
-4.96	-0.276796	0.0308082	0.949869	0.479915	0.0492697	-0.855107	-0.282014	0.339218	-0.328723	-0.119475	-0.760861	0.397368	0.184934	0.150509	0.275345	0.0495634	-0.0917582	0.0503813	-0.40986	0.418723	-1.02288	0.275298
-4.95952	-0.276653	0.0309363	0.950297	0.47993	0.0491815	-0.853466	-0.281433	0.339031	-0.328991	-0.119448	-0.758883	0.397717	0.184776	0.150778	0.275162	0.0494463	-0.091921	0.0504846	-0.409868	0.418426	-1.02251	0.274746
-4.95904	-0.277158	0.0301715	0.950194	0.4804	0.0499769	-0.852651	-0.280525	0.338696	-0.329201	-0.119557	-0.75792	0.39779	0.184688	0.151019	0.274982	0.0490341	-0.0915875	0.0509563	-0.40927	0.418229	-1.02191	0.274336
-4.95856	-0.278288	0.0297301	0.950571	0.479777	0.0500189	-0.851457	-0.279675	0.338549	-0.328781	-0.119349	-0.756662	0.39735	0.184738	0.151408	0.274451	0.0489263	-0.0911777	0.0510946	-0.408908	0.418166	-1.02131	0.273858
-4.95808	-0.278353	0.0295974	0.950714	0.479967	0.0504804	-0.852165	-0.279334	0.338228	-0.328952	-0.119639	-0.755225	0.397318	0.184586	0.15174	0.274399	0.0492748	-0.0907404	0.0515596	-0.40851	0.418043	-1.02113	0.273338
-4.9576	-0.279104	0.0294211	0.95085	0.480282	0.0503072	-0.850497	-0.278385	0.337829	-0.329136	-0.119559	-0.753415	0.39721	0.185058	0.152037	0.274177	0.049351	-0.0903536	0.0514666	-0.408352	0.418129	-1.02065	0.272854
-4.95712	-0.278731	0.0292963	0.950647	0.480385	0.0508824	-0.849156	-0.278117	0.337399	-0.328565	-0.119342	-0.75098	0.397046	0.185127	0.152302	0.274187	0.0489498	-0.0901788	0.0516085	-0.408222	0.417749	-1.02107	0.272635
-4.95664	-0.278913	0.0285224	0.950712	0.480094	0.0509137	-0.847455	-0.277306	0.337022	-0.328632	-0.11931	-0.749924	0.397592	0.185244	0.152513	0.27399	0.0488431	-0.0897747	0.0521035	-0.407583	0.417553	-1.0209	0.272387
-4.95616	-0.27918	0.0283614	0.951006	0.480154	0.0510674	-0.84648	-0.276159	0.336775	-0.328425	-0.119394	-0.748721	0.397644	0.185378	0.152421	0.273448	0.0491261	-0.0894698	0.0523021	-0.407251	0.417318	-1.02122	0.272272
-4.95568	-0.279385	0.0277649	0.950698	0.481029	0.0511639	-0.846381	-0.275599	0.336493	-0.327943	-0.119216	-0.747582	0.397399	0.185723	0.152366	0.273144	0.049416	-0.0890905	0.0524595	-0.407228	0.417129	-1.02062	0.27228
-4.9552	-0.280037	0.0276253	0.950866	0.481033	0.0512859	-0.845684	-0.275572	0.336178	-0.326951	-0.118947	-0.745374	0.397338	0.18607	0.152569	0.272848	0.0489445	-0.0890242	0.0525911	-0.406971	0.416966	-1.02062	0.272203
-4.95472	-0.279766	0.0267405	0.950731	0.480725	0.051396	-0.845162	-0.274268	0.336049	-0.326565	-0.118667	-0.743412	0.397989	0.185927	0.15311	0.272905	0.0483943	-0.0890674	0.0527284	-0.406815	0.416792	-1.02053	0.27195
-4.95424	-0.280129	0.0262661	0.950577	0.480553	0.0515365	-0.845326	-0.274055	0.335824	-0.326345	-0.118854	-0.742758	0.398048	0.186041	0.153137	0.273051	0.0490504	-0.0890139	0.0523601	-0.406735	0.416789	-1.02095	0.271619
-4.95376	-0.28009	0.0258256	0.950598	0.478979	0.0521137	-0.844593	-0.273667	0.335532	-0.325511	-0.118526	-0.740732	0.397923	0.185889	0.153248	0.273204	0.0487617	-0.0888294	0.0525038	-0.406521	0.416391	-1.0212	0.271435
-4.95328	-0.280675	0.02559	0.950462	0.478292	0.0521592	-0.845309	-0.2722	0.335226	-0.324869	-0.11791	-0.740318	0.39822	0.185999	0.153342	0.273146	0.0487982	-0.088635	0.0528081	-0.406433	0.416147	-1.02103	0.271248
-4.9528	-0.280955	0.024785	0.950603	0.478562	0.0522924	-0.845104	-0.271409	0.334882	-0.324979	-0.118097	-0.739744	0.398138	0.1862	0.153428	0.272707	0.0490146	-0.088719	0.0531942	-0.406267	0.415966	-1.02103	0.270938
-4.95232	-0.281237	0.0238965	0.950954	0.479119	0.0525653	-0.846207	-0.271147	0.334542	-0.32417	-0.117533	-0.739095	0.3985	0.186112	0.153122	0.27234	0.0496446	-0.0886628	0.053191	-0.40573	0.415605	-1.02136	0.2707
-4.95184	-0.281295	0.0234034	0.951046	0.479191	0.0527716	-0.845062	-0.270555	0.334154	-0.323846	-0.117503	-0.739735	0.399304	0.18608	0.152939	0.27251	0.0498566	-0.0885496	0.0534398	-0.405645	0.415447	-1.0217	0.270622
-4.95136	-0.280981	0.0230256	0.951021	0.479682	0.0522962	-0.844565	-0.270195	0.333878	-0.324417	-0.11695	-0.739428	0.398897	0.185943	0.153242	0.271759	0.0499101	-0.0883372	0.0535945	-0.405101	0.415186	-1.0221	0.270411
-4.95088	-0.280048	0.0227718	0.951225	0.480077	0.0520535	-0.844828	-0.269293	0.333445	-0.324439	-0.116434	-0.738915	0.398919	0.185963	0.153502	0.27161	0.0500824	-0.0883042	0.0536962	-0.405301	0.414997	-1.02248	0.270343
-4.9504	-0.280054	0.0221387	0.951313	0.480348	0.0518419	-0.844148	-0.267999	0.333172	-0.324907	-0.116616	-0.737395	0.398807	0.185901	0.153483	0.271262	0.0505414	-0.0883004	0.0538208	-0.405127	0.414583	-1.02193	0.269683
-4.94992	-0.27922	0.0210795	0.950957	0.480703	0.0516755	-0.844113	-0.268007	0.332785	-0.325324	-0.117066	-0.737161	0.398575	0.186038	0.153557	0.270881	0.0507893	-0.0883643	0.0542582	-0.405029	0.414216	-1.02247	0.2697
-4.94944	-0.278271	0.0206403	0.950808	0.480463	0.0517878	-0.844442	-0.267378	0.332508	-0.325725	-0.11796	-0.737225	0.397905	0.186105	0.153254	0.270437	0.0504652	-0.0885601	0.054368	-0.404732	0.414342	-1.02358	0.268987
-4.94896	-0.278267	0.0200205	0.951114	0.480428	0.0519448	-0.844796	-0.265908	0.332235	-0.325173	-0.118022	-0.736895	0.397526	0.186014	0.152891	0.270198	0.0500974	-0.0885623	0.0546406	-0.404521	0.414196	-1.0242	0.26869
-4.94848	-0.27741	0.0199308	0.951518	0.481003	0.0524827	-0.845777	-0.264799	0.331981	-0.325116	-0.117589	-0.735858	0.397567	0.186245	0.153011	0.269832	0.0495775	-0.0887034	0.0552837	-0.404601	0.413587	-1.02454	0.268634
-4.948	-0.275907	0.0192603	0.95064	0.481404	0.0523601	-0.845849	-0.26398	0.331552	-0.32499	-0.117533	-0.735481	0.397157	0.186065	0.15318	0.269786	0.0493811	-0.0886546	0.0556728	-0.404473	0.41314	-1.02503	0.26877
-4.94752	-0.275532	0.0189709	0.951075	0.481379	0.0524901	-0.845023	-0.263246	0.331277	-0.324894	-0.117436	-0.735835	0.397003	0.185769	0.153159	0.269824	0.0486461	-0.0887562	0.055749	-0.404333	0.413076	-1.0257	0.268534
-4.94704	-0.27491	0.0181497	0.95097	0.48154	0.0530342	-0.844169	-0.261852	0.331232	-0.325693	-0.117867	-0.73505	0.396055	0.185463	0.153101	0.270018	0.0485478	-0.0887668	0.0564023	-0.404266	0.412694	-1.02586	0.268574
-4.94656	-0.273687	0.016863	0.950794	0.481445	0.0528733	-0.844123	-0.261788	0.331085	-0.326121	-0.118037	-0.735215	0.395757	0.185461	0.153352	0.270268	0.0473858	-0.0887088	0.0564068	-0.403972	0.412766	-1.0258	0.268326
-4.94608	-0.272858	0.0159384	0.950727	0.481757	0.0525998	-0.8438	-0.260934	0.330671	-0.325312	-0.117466	-0.73445	0.396267	0.185441	0.153371	0.270068	0.0470346	-0.0886319	0.0565883	-0.403825	0.412821	-1.02546	0.268495
-4.9456	-0.272192	0.0155652	0.950303	0.481685	0.0525241	-0.843766	-0.260727	0.330637	-0.32549	-0.116916	-0.734212	0.396257	0.185287	0.153127	0.269676	0.0466073	-0.0888667	0.056763	-0.403588	0.412358	-1.02633	0.268054
-4.94512	-0.271416	0.0149557	0.950928	0.482287	0.0528267	-0.843722	-0.260382	0.330498	-0.324266	-0.11661	-0.732819	0.395427	0.185452	0.152684	0.269293	0.0465315	-0.0888003	0.0570031	-0.403374	0.41222	-1.02645	0.267945
-4.94464	-0.270702	0.0145062	0.950583	0.483009	0.0532628	-0.84276	-0.259491	0.330236	-0.324331	-0.116664	-0.733046	0.39508	0.185164	0.152811	0.268719	0.0461925	-0.0889743	0.0578251	-0.403251	0.41203	-1.02682	0.268075
-4.94416	-0.270171	0.0144918	0.951054	0.483151	0.0530274	-0.84124	-0.259408	0.329876	-0.324221	-0.116894	-0.732954	0.395047	0.185071	0.152913	0.268184	0.0465099	-0.089298	0.0581567	-0.402826	0.411855	-1.02707	0.267942
-4.94368	-0.270724	0.0141921	0.950677	0.483929	0.0529504	-0.839941	-0.257764	0.329686	-0.324404	-0.116571	-0.732782	0.395056	0.184631	0.152927	0.268072	0.0458952	-0.089343	0.05863	-0.40283	0.411812	-1.02819	0.267855
-4.9432	-0.270254	0.0138746	0.95141	0.48469	0.0529514	-0.839327	-0.257055	0.329377	-0.323609	-0.116489	-0.73316	0.394861	0.184432	0.152486	0.267578	0.0458399	-0.0892987	0.0593701	-0.40296	0.411537	-1.02826	0.267638
-4.94272	-0.269186	0.0138085	0.951244	0.486071	0.0529139	-0.839133	-0.256581	0.329121	-0.323961	-0.116347	-0.732938	0.39361	0.184352	0.152149	0.267791	0.0457523	-0.0891725	0.059657	-0.402846	0.411541	-1.02855	0.267505
-4.94224	-0.269279	0.0139119	0.95139	0.485986	0.0529431	-0.83838	-0.255564	0.328895	-0.323855	-0.116351	-0.733216	0.392176	0.184063	0.151804	0.267836	0.0455821	-0.0892837	0.0602612	-0.402855	0.411017	-1.02843	0.267458
-4.94176	-0.269422	0.0140274	0.951503	0.485723	0.0531521	-0.83764	-0.255286	0.328718	-0.324749	-0.116436	-0.733264	0.391651	0.184365	0.151552	0.267476	0.0454975	-0.0893156	0.0607191	-0.402885	0.411118	-1.02848	0.267229
-4.94128	-0.269691	0.0140407	0.951568	0.485797	0.0527518	-0.837486	-0.254048	0.328791	-0.324898	-0.116918	-0.731575	0.392092	0.18419	0.151063	0.26691	0.0452613	-0.0895021	0.0609452	-0.402855	0.41093	-1.02864	0.266764
-4.9408	-0.269223	0.0139629	0.951222	0.486045	0.0532302	-0.836936	-0.253919	0.328503	-0.324644	-0.116767	-0.732325	0.391515	0.184114	0.150838	0.266865	0.0446804	-0.0894727	0.0613416	-0.402506	0.410371	-1.02934	0.26639
-4.94032	-0.269361	0.0138065	0.950924	0.485684	0.0533286	-0.836546	-0.252746	0.328067	-0.324857	-0.116874	-0.731793	0.390727	0.184083	0.150097	0.266854	0.0451556	-0.0895623	0.0619018	-0.402299	0.410295	-1.02941	0.266264
-4.93984	-0.269367	0.0131065	0.951616	0.484375	0.0529513	-0.836634	-0.251529	0.32777	-0.324831	-0.116355	-0.731632	0.390225	0.184089	0.149825	0.266999	0.0451008	-0.0894279	0.0622989	-0.402131	0.409814	-1.02926	0.266152
-4.93936	-0.269766	0.0125422	0.951894	0.485181	0.0525704	-0.836342	-0.249931	0.327685	-0.325692	-0.115922	-0.731265	0.390074	0.184092	0.149817	0.267539	0.0448575	-0.0897005	0.0628641	-0.40191	0.410007	-1.02911	0.265843
-4.93888	-0.269957	0.0128362	0.952005	0.485813	0.0527242	-0.836277	-0.249514	0.327565	-0.32559	-0.115708	-0.729715	0.389938	0.183964	0.149896	0.267766	0.044634	-0.0897993	0.0628157	-0.401471	0.409977	-1.02924	0.265545
-4.9384	-0.26984	0.0127621	0.952119	0.486201	0.052816	-0.83622	-0.24863	0.327518	-0.325885	-0.11576	-0.729245	0.38966	0.183879	0.149883	0.267854	0.0436744	-0.0901276	0.0631558	-0.401276	0.409378	-1.02971	0.26544
-4.93792	-0.270008	0.0126382	0.95227	0.48601	0.0526751	-0.835646	-0.248095	0.327468	-0.326245	-0.116075	-0.728774	0.389758	0.183606	0.150117	0.267904	0.0432276	-0.0902674	0.0635403	-0.400876	0.409025	-1.0294	0.265179
-4.93744	-0.269244	0.0119009	0.952019	0.486362	0.0525016	-0.834665	-0.247511	0.327435	-0.326246	-0.116174	-0.727837	0.389299	0.183837	0.150016	0.267621	0.0425977	-0.0902156	0.0638055	-0.400851	0.408711	-1.02964	0.265029
-4.93696	-0.269202	0.0119604	0.95207	0.486655	0.0525778	-0.834159	-0.246422	0.327262	-0.325983	-0.116207	-0.726846	0.389745	0.183554	0.15047	0.267876	0.0422695	-0.0902841	0.0641937	-0.400721	0.408082	-1.02957	0.264702
-4.93648	-0.268624	0.0112885	0.952332	0.486227	0.0523578	-0.833345	-0.245473	0.327132	-0.325925	-0.11619	-0.725249	0.389295	0.183309	0.150416	0.267174	0.042102	-0.0903022	0.0641764	-0.400365	0.407664	-1.02978	0.264164
-4.936	-0.268287	0.0109497	0.952111	0.487095	0.0524843	-0.832953	-0.24519	0.326925	-0.325872	-0.11652	-0.723574	0.388292	0.183123	0.150339	0.266965	0.0414182	-0.0902913	0.0643389	-0.400466	0.407494	-1.02961	0.264482
-4.93552	-0.268209	0.0103104	0.952419	0.4882	0.0525656	-0.832149	-0.244237	0.326632	-0.325663	-0.116614	-0.72304	0.387643	0.183123	0.150604	0.267011	0.0409963	-0.0901753	0.0643093	-0.400453	0.407068	-1.02973	0.264241
-4.93504	-0.266624	0.00955615	0.95263	0.488544	0.0523007	-0.832282	-0.243759	0.32655	-0.325549	-0.116489	-0.721676	0.387533	0.183405	0.150574	0.266604	0.040566	-0.0901186	0.0645218	-0.400487	0.406447	-1.02993	0.263917
-4.93456	-0.266177	0.00858553	0.952783	0.489632	0.0529716	-0.83155	-0.243106	0.326254	-0.326319	-0.116477	-0.720959	0.387187	0.182957	0.150621	0.266546	0.0400724	-0.090195	0.0646667	-0.400229	0.405995	-1.03025	0.263551
-4.93408	-0.265561	0.008432	0.952957	0.490369	0.053108	-0.831301	-0.241814	0.326341	-0.325759	-0.116101	-0.719999	0.386669	0.182861	0.150823	0.266666	0.040014	-0.0904097	0.0650981	-0.399873	0.405422	-1.03046	0.263483
-4.9336	-0.264939	0.00819356	0.953698	0.490327	0.0532453	-0.83063	-0.241985	0.326347	-0.326482	-0.116128	-0.719659	0.386025	0.182443	0.151021	0.265662	0.0397563	-0.0905727	0.0652761	-0.39956	0.40498	-1.03046	0.263227
-4.93312	-0.264117	0.00748997	0.953361	0.490307	0.052994	-0.830149	-0.241288	0.326069	-0.327121	-0.11604	-0.718521	0.385779	0.182218	0.150512	0.265717	0.0399908	-0.0907509	0.0652833	-0.399231	0.404336	-1.03096	0.263072
-4.93264	-0.263744	0.00709615	0.952857	0.489205	0.0533574	-0.828633	-0.240635	0.325988	-0.327689	-0.115892	-0.716341	0.385296	0.181868	0.150811	0.265877	0.0390983	-0.0907968	0.0655517	-0.398711	0.404006	-1.03123	0.26267
-4.93216	-0.263775	0.00692195	0.952878	0.489429	0.0535996	-0.828719	-0.239973	0.325686	-0.32774	-0.116069	-0.715288	0.385074	0.182033	0.150765	0.265578	0.0388031	-0.0911685	0.0657994	-0.398408	0.403149	-1.03119	0.262829
-4.93168	-0.263798	0.00645707	0.953294	0.489005	0.0536173	-0.82856	-0.239353	0.325531	-0.32833	-0.115816	-0.714994	0.385322	0.182233	0.150456	0.266017	0.0387154	-0.0912398	0.0658412	-0.398201	0.402922	-1.03171	0.262741
-4.9312	-0.264144	0.00628713	0.953733	0.489636	0.053671	-0.8288	-0.238069	0.325657	-0.327817	-0.115962	-0.713412	0.385485	0.181823	0.150141	0.265973	0.0380084	-0.0915138	0.0668237	-0.397689	0.402903	-1.03222	0.262264
-4.93072	-0.263948	0.00549613	0.953798	0.489705	0.053351	-0.828354	-0.23767	0.325472	-0.327863	-0.115766	-0.712052	0.384964	0.181637	0.149616	0.265084	0.0379248	-0.0918268	0.0671489	-0.397754	0.402576	-1.03275	0.261985
-4.93024	-0.263992	0.00523012	0.954186	0.490026	0.0536276	-0.827756	-0.237483	0.325439	-0.328431	-0.115567	-0.711007	0.384428	0.181518	0.149987	0.265039	0.0379304	-0.0921742	0.0677535	-0.396727	0.402212	-1.03286	0.261489
-4.92976	-0.263792	0.00410256	0.95474	0.490195	0.0536768	-0.826117	-0.237134	0.325485	-0.328419	-0.115496	-0.710426	0.383937	0.181236	0.149914	0.264569	0.0374502	-0.0926128	0.0681382	-0.396145	0.401707	-1.0329	0.261089
-4.92928	-0.263666	0.00373405	0.955622	0.491122	0.0537042	-0.825853	-0.236982	0.325332	-0.328586	-0.115481	-0.708748	0.383652	0.181113	0.149567	0.264513	0.0373582	-0.0928035	0.0684319	-0.395893	0.401395	-1.03272	0.260515
-4.9288	-0.263621	0.00349254	0.955564	0.491423	0.0536066	-0.825926	-0.236649	0.325418	-0.32806	-0.11562	-0.706475	0.383349	0.181007	0.149484	0.264442	0.0367333	-0.0935783	0.0686243	-0.395855	0.401006	-1.03228	0.260237
-4.92832	-0.263118	0.00283334	0.956023	0.49217	0.0538919	-0.825449	-0.236052	0.325395	-0.328301	-0.115857	-0.704241	0.382263	0.180802	0.149711	0.26415	0.0362822	-0.093907	0.0690323	-0.395392	0.40084	-1.03169	0.259866
-4.92784	-0.262791	0.00202344	0.955948	0.492992	0.0538529	-0.825254	-0.23558	0.325236	-0.328853	-0.115551	-0.703283	0.381719	0.180382	0.149438	0.263674	0.0356074	-0.0942985	0.0689309	-0.395145	0.400767	-1.03164	0.259436
-4.92736	-0.263049	0.00123751	0.95618	0.493657	0.0541261	-0.823715	-0.235117	0.325309	-0.32891	-0.11509	-0.701728	0.381035	0.180486	0.149748	0.263291	0.0354776	-0.0945702	0.0691274	-0.394774	0.400228	-1.03102	0.259084
-4.92688	-0.263029	0.000855032	0.956054	0.493588	0.0540456	-0.823262	-0.234513	0.325372	-0.3292	-0.114859	-0.69945	0.380937	0.180672	0.149818	0.263293	0.0353453	-0.0948086	0.0692741	-0.394208	0.399873	-1.03102	0.258904
-4.9264	-0.262123	-0.000140232	0.955982	0.493849	0.0538574	-0.822096	-0.23433	0.325113	-0.328935	-0.115182	-0.697282	0.380093	0.180767	0.150272	0.262309	0.0357383	-0.0951957	0.0694026	-0.394249	0.399321	-1.03125	0.258562
-4.92592	-0.261892	-0.000671387	0.956502	0.494825	0.0533419	-0.820807	-0.233751	0.325079	-0.330253	-0.115399	-0.696135	0.380199	0.180383	0.150556	0.26275	0.034906	-0.0956519	0.0697132	-0.394088	0.398822	-1.0313	0.258217
-4.92544	-0.262006	-0.00195734	0.956977	0.495327	0.0532081	-0.82001	-0.233089	0.324997	-0.33089	-0.115835	-0.695056	0.379608	0.17989	0.150505	0.262977	0.0347728	-0.0959025	0.0697037	-0.394162	0.398955	-1.03137	0.258121
-4.92496	-0.262708	-0.00319786	0.957062	0.494667	0.0530362	-0.819208	-0.232984	0.324913	-0.331154	-0.115824	-0.694086	0.379087	0.179653	0.150571	0.262342	0.0340651	-0.0962151	0.0697701	-0.394266	0.398442	-1.03131	0.257804
-4.92448	-0.262504	-0.00391628	0.957593	0.49505	0.0530668	-0.818756	-0.232041	0.324681	-0.330909	-0.115881	-0.691618	0.3791	0.17993	0.151122	0.262343	0.0337163	-0.0965455	0.0702521	-0.394006	0.397985	-1.03102	0.257178
-4.924	-0.261633	-0.00511105	0.957721	0.495041	0.052674	-0.818324	-0.23173	0.324484	-0.330702	-0.115915	-0.689073	0.377693	0.179986	0.151055	0.26233	0.0337506	-0.0967413	0.0705035	-0.39377	0.397569	-1.03184	0.256925
-4.92352	-0.261546	-0.00544992	0.958103	0.495312	0.0527078	-0.818034	-0.231101	0.324257	-0.329906	-0.116378	-0.687379	0.377988	0.179833	0.151321	0.261604	0.0337953	-0.0972331	0.0705295	-0.39355	0.397206	-1.03214	0.256457
-4.92304	-0.26201	-0.005912	0.958093	0.495654	0.0525887	-0.817432	-0.229796	0.324244	-0.329253	-0.116713	-0.685848	0.377448	0.179813	0.150942	0.261362	0.0334658	-0.0974956	0.0706394	-0.393533	0.397405	-1.03231	0.255924
-4.92256	-0.261431	-0.00644424	0.958079	0.496102	0.0532518	-0.815056	-0.229476	0.324029	-0.329307	-0.11682	-0.683388	0.376395	0.17975	0.150881	0.261473	0.0333558	-0.0978224	0.0711988	-0.393363	0.397332	-1.03177	0.255497
-4.92208	-0.26098	-0.00716545	0.95799	0.496202	0.0535178	-0.814165	-0.228776	0.323905	-0.329182	-0.116878	-0.683159	0.375238	0.179753	0.151075	0.261735	0.0333986	-0.0982251	0.0714607	-0.393456	0.397274	-1.03104	0.255297
-4.9216	-0.26028	-0.0078311	0.958608	0.497505	0.0540987	-0.813382	-0.228409	0.324008	-0.329813	-0.116877	-0.682255	0.374308	0.179815	0.150945	0.261716	0.033661	-0.0983946	0.0720084	-0.393362	0.397209	-1.03002	0.255139
-4.92112	-0.259912	-0.00807777	0.959184	0.499245	0.0547734	-0.812814	-0.227669	0.32385	-0.32966	-0.11663	-0.681337	0.373989	0.179705	0.150858	0.261219	0.0324732	-0.0986552	0.0724193	-0.393185	0.397287	-1.02977	0.255136
-4.92064	-0.260459	-0.00814492	0.959689	0.4998	0.055105	-0.811882	-0.226348	0.323632	-0.329953	-0.117003	-0.678315	0.372995	0.179489	0.150684	0.261781	0.0322071	-0.0991696	0.0724193	-0.393175	0.396943	-1.02926	0.254541
-4.92016	-0.259984	-0.00895185	0.960215	0.500379	0.0553661	-0.810597	-0.224967	0.323414	-0.329836	-0.117092	-0.676805	0.372225	0.179496	0.150687	0.261645	0.0323644	-0.0997469	0.0727288	-0.39306	0.396717	-1.02955	0.25462
-4.91968	-0.259462	-0.00953262	0.960513	0.500616	0.0554468	-0.810475	-0.224331	0.323378	-0.329684	-0.116833	-0.674967	0.371345	0.179858	0.150424	0.261709	0.0326076	-0.0995733	0.0729564	-0.392956	0.396375	-1.03007	0.254489
-4.9192	-0.259308	-0.00977028	0.960768	0.501575	0.0552747	-0.810314	-0.222735	0.323433	-0.329896	-0.11672	-0.67346	0.370236	0.179823	0.15052	0.26172	0.0320979	-0.0998578	0.0731172	-0.393006	0.396296	-1.02955	0.254212
-4.91872	-0.260077	-0.00948435	0.960708	0.501598	0.0554861	-0.810111	-0.222262	0.323297	-0.32906	-0.116655	-0.671575	0.369447	0.179788	0.150283	0.262137	0.0315955	-0.0998728	0.0736048	-0.392742	0.396251	-1.02912	0.254055
-4.91824	-0.2598	-0.00955966	0.960552	0.501193	0.0553095	-0.809188	-0.221606	0.32337	-0.329671	-0.116791	-0.670262	0.368536	0.179942	0.150302	0.262744	0.0311025	-0.100128	0.0737006	-0.393047	0.396024	-1.03004	0.253845
-4.91776	-0.259438	-0.00978639	0.960912	0.501741	0.0554908	-0.808676	-0.220811	0.323266	-0.329012	-0.116249	-0.667425	0.367519	0.180124	0.149956	0.262745	0.0293566	-0.100147	0.0739306	-0.392937	0.395446	-1.03006	0.253675
-4.91728	-0.258714	-0.00929345	0.961205	0.50183	0.0557733	-0.807981	-0.22058	0.323228	-0.329263	-0.115959	-0.665706	0.366846	0.180016	0.149749	0.263381	0.0289012	-0.100349	0.0741918	-0.392546	0.395091	-1.03004	0.254114
-4.9168	-0.258553	-0.00915976	0.961503	0.502224	0.0559731	-0.807478	-0.219846	0.323088	-0.329089	-0.115898	-0.663304	0.365548	0.180127	0.149716	0.26318	0.0289683	-0.100748	0.0741855	-0.392229	0.395009	-1.02967	0.254339
-4.91632	-0.259168	-0.00928015	0.961852	0.501603	0.0560439	-0.806702	-0.219039	0.323122	-0.329222	-0.115378	-0.663091	0.364588	0.180489	0.149116	0.26342	0.0283112	-0.101164	0.0744054	-0.39233	0.394995	-1.02995	0.254227
-4.91584	-0.258559	-0.00987787	0.961781	0.500388	0.0565244	-0.805602	-0.218443	0.322912	-0.32877	-0.115212	-0.661367	0.363791	0.180618	0.149272	0.263394	0.0278805	-0.10154	0.0749081	-0.392298	0.394487	-1.02963	0.254428
-4.91536	-0.258795	-0.0099546	0.962429	0.500814	0.0564687	-0.80532	-0.218105	0.322586	-0.328037	-0.114637	-0.659155	0.362877	0.180695	0.149364	0.263528	0.025666	-0.101542	0.0752903	-0.391865	0.394663	-1.02973	0.254578
-4.91488	-0.25859	-0.0102435	0.963112	0.501234	0.0566753	-0.80496	-0.217394	0.322643	-0.327126	-0.114559	-0.656834	0.362167	0.180972	0.149347	0.263842	0.0254278	-0.101321	0.0754636	-0.391548	0.394405	-1.03006	0.254472
-4.9144	-0.258814	-0.010535	0.962842	0.501736	0.0573099	-0.804802	-0.21695	0.322803	-0.326195	-0.114184	-0.654707	0.361205	0.181183	0.149134	0.264072	0.0246558	-0.101308	0.0757562	-0.391558	0.394294	-1.02968	0.254505
-4.91392	-0.258858	-0.0106607	0.963152	0.500649	0.0573409	-0.805058	-0.216753	0.322449	-0.325917	-0.114151	-0.65232	0.360434	0.180879	0.149221	0.264398	0.0225331	-0.101777	0.07613	-0.391592	0.394048	-1.02942	0.254208
-4.91344	-0.258359	-0.0109442	0.963539	0.500785	0.0578856	-0.805042	-0.216377	0.322419	-0.325395	-0.113583	-0.648814	0.359788	0.180588	0.149253	0.265241	0.0220541	-0.102011	0.0762381	-0.391527	0.393922	-1.029	0.253794
-4.91296	-0.258668	-0.0110594	0.964204	0.50046	0.0588655	-0.804482	-0.215214	0.322565	-0.32531	-0.113636	-0.645859	0.359491	0.180499	0.149082	0.266309	0.0212305	-0.102127	0.0765848	-0.391609	0.393669	-1.02894	0.253654
-4.91248	-0.258675	-0.0110952	0.964459	0.500842	0.0588423	-0.804132	-0.214809	0.322698	-0.325612	-0.113162	-0.643684	0.358856	0.180474	0.149527	0.266997	0.0206395	-0.102431	0.0768999	-0.391605	0.393557	-1.02873	0.253691
-4.912	-0.258658	-0.011539	0.964516	0.500366	0.0589949	-0.803575	-0.214735	0.322421	-0.326255	-0.112737	-0.64196	0.358992	0.180331	0.149587	0.266643	0.0198874	-0.102654	0.0771099	-0.391818	0.393556	-1.02811	0.253663
-4.91152	-0.259023	-0.0117976	0.964584	0.500884	0.0597189	-0.80349	-0.214493	0.322288	-0.326056	-0.112514	-0.639749	0.357883	0.180106	0.149938	0.266899	0.0194992	-0.10284	0.0775197	-0.391523	0.39303	-1.02784	0.253443
-4.91104	-0.258463	-0.0124774	0.9645	0.500969	0.0598536	-0.803065	-0.214216	0.322291	-0.324903	-0.112008	-0.638078	0.357161	0.179961	0.14995	0.267405	0.0185144	-0.102763	0.0780471	-0.391442	0.392662	-1.02695	0.253439
-4.91056	-0.25854	-0.0124282	0.964637	0.501388	0.0599811	-0.802439	-0.213815	0.322217	-0.324095	-0.111635	-0.635011	0.356753	0.179714	0.150098	0.267913	0.0178955	-0.102542	0.0782366	-0.391669	0.392249	-1.02695	0.2533
-4.91008	-0.259236	-0.0131466	0.964196	0.501285	0.0602667	-0.80186	-0.213662	0.321977	-0.32385	-0.111598	-0.633246	0.355957	0.179576	0.150097	0.268598	0.0169097	-0.102578	0.0786336	-0.391489	0.39218	-1.02689	0.253159
-4.9096	-0.259282	-0.0132893	0.964269	0.501109	0.0606729	-0.801878	-0.21314	0.321831	-0.323073	-0.111331	-0.633082	0.355386	0.179373	0.149722	0.268468	0.0170605	-0.102761	0.078941	-0.391314	0.39204	-1.02731	0.253186
-4.90912	-0.259803	-0.0131794	0.964293	0.500777	0.0609032	-0.802055	-0.213567	0.321733	-0.322665	-0.110848	-0.630672	0.354909	0.178908	0.149335	0.268988	0.0169145	-0.103009	0.0795192	-0.391002	0.392014	-1.02609	0.252793
-4.90864	-0.260413	-0.0129603	0.96489	0.501289	0.0611119	-0.80189	-0.213461	0.32164	-0.321872	-0.110407	-0.630018	0.353953	0.178658	0.149621	0.269559	0.0163162	-0.102951	0.0796959	-0.390981	0.39159	-1.0261	0.253183
-4.90816	-0.261292	-0.0130462	0.965417	0.50124	0.0607129	-0.801232	-0.213401	0.321389	-0.321044	-0.110356	-0.628145	0.353217	0.178705	0.149463	0.269965	0.0158097	-0.103292	0.0797645	-0.390734	0.391483	-1.02616	0.253638
-4.90768	-0.261217	-0.01326	0.965338	0.500429	0.0609398	-0.80117	-0.213393	0.321029	-0.320777	-0.10967	-0.626057	0.352587	0.178468	0.149404	0.269901	0.0148862	-0.103539	0.0798991	-0.390351	0.390972	-1.02587	0.253475
-4.9072	-0.259747	-0.0134176	0.965678	0.500352	0.0617885	-0.800818	-0.213508	0.32099	-0.32006	-0.109442	-0.624808	0.351814	0.178885	0.149181	0.27029	0.0136191	-0.103698	0.0802221	-0.390357	0.39079	-1.02599	0.253489
-4.90672	-0.260455	-0.0138664	0.966317	0.500953	0.0617618	-0.799856	-0.213903	0.320829	-0.319433	-0.108899	-0.622619	0.351717	0.178782	0.149211	0.27112	0.013245	-0.103866	0.0805508	-0.390246	0.390743	-1.02539	0.252889
-4.90624	-0.260691	-0.013503	0.966747	0.501923	0.0622504	-0.798943	-0.214313	0.320696	-0.318585	-0.108493	-0.619753	0.351069	0.178971	0.149071	0.271175	0.0126353	-0.10406	0.0810746	-0.389802	0.390616	-1.02557	0.252685
-4.90576	-0.261092	-0.0133838	0.966988	0.502117	0.0628429	-0.798775	-0.214264	0.320246	-0.318814	-0.107855	-0.618586	0.351015	0.179059	0.149075	0.27106	0.0119946	-0.104115	0.0812686	-0.389687	0.389968	-1.02507	0.252756
-4.90528	-0.261383	-0.013196	0.967335	0.502859	0.062908	-0.797871	-0.213644	0.319886	-0.318429	-0.107409	-0.617604	0.351294	0.179477	0.148828	0.27099	0.011105	-0.104143	0.0816751	-0.389607	0.389885	-1.02492	0.25243
-4.9048	-0.261687	-0.0127878	0.967449	0.503709	0.0632375	-0.797036	-0.213965	0.319857	-0.318034	-0.106915	-0.616993	0.350767	0.179554	0.148978	0.271413	0.0108717	-0.104312	0.0818662	-0.389235	0.389928	-1.02498	0.252102
-4.90432	-0.262324	-0.012654	0.966886	0.504548	0.0634163	-0.79545	-0.213885	0.319546	-0.31719	-0.106602	-0.614573	0.349773	0.179897	0.149215	0.271962	0.010344	-0.104385	0.0823575	-0.389186	0.389802	-1.02492	0.251704
-4.90384	-0.262659	-0.0125891	0.967191	0.506329	0.0637506	-0.794501	-0.213628	0.319419	-0.317066	-0.106362	-0.612677	0.349286	0.17986	0.149126	0.271914	0.0105479	-0.104591	0.0825613	-0.388808	0.389955	-1.02423	0.251365
-4.90336	-0.261983	-0.012425	0.967524	0.506431	0.0638826	-0.79391	-0.213128	0.319294	-0.317403	-0.105977	-0.611247	0.348826	0.179924	0.14905	0.272664	0.00968497	-0.105239	0.0828042	-0.388541	0.38991	-1.02423	0.251166
-4.90288	-0.262271	-0.0124257	0.967339	0.50777	0.0644687	-0.793434	-0.213088	0.319068	-0.317155	-0.1057	-0.6099	0.348565	0.180223	0.149026	0.273262	0.00987579	-0.105466	0.0831837	-0.387717	0.389417	-1.02385	0.250622
-4.9024	-0.262583	-0.0124402	0.967035	0.509201	0.0650202	-0.793409	-0.212793	0.319002	-0.315718	-0.105245	-0.607993	0.34819	0.180473	0.148744	0.273176	0.00958783	-0.105733	0.0836459	-0.387684	0.389299	-1.02366	0.250487
-4.90192	-0.262711	-0.011838	0.966794	0.51051	0.0651999	-0.792189	-0.212473	0.31885	-0.314399	-0.104844	-0.606822	0.348061	0.180184	0.148711	0.273395	0.00781904	-0.10595	0.0840272	-0.387328	0.389166	-1.02373	0.250571
-4.90144	-0.26167	-0.0117683	0.96687	0.510768	0.0655734	-0.790611	-0.212261	0.318618	-0.314469	-0.104996	-0.605846	0.347976	0.180155	0.148758	0.273193	0.00775552	-0.106084	0.0843488	-0.387024	0.389241	-1.02342	0.250288
-4.90096	-0.260509	-0.0115434	0.967022	0.510043	0.0659373	-0.789817	-0.212384	0.318314	-0.315232	-0.104731	-0.605286	0.347622	0.180187	0.148628	0.272617	0.00749057	-0.106562	0.0847305	-0.387057	0.38924	-1.02357	0.250037
-4.90048	-0.261051	-0.0117444	0.967258	0.510154	0.065754	-0.789049	-0.212365	0.318305	-0.314084	-0.104949	-0.60576	0.346794	0.180033	0.148343	0.272601	0.00680746	-0.106979	0.0848196	-0.387049	0.389107	-1.02389	0.24954
-4.9	-0.260405	-0.0114026	0.967223	0.510912	0.0659007	-0.788399	-0.2127	0.318092	-0.3133	-0.105117	-0.604696	0.346029	0.180329	0.148944	0.273324	0.00644526	-0.107535	0.0849143	-0.386889	0.388654	-1.02425	0.249245
-4.89952	-0.259471	-0.0113514	0.967605	0.511973	0.06649	-0.787487	-0.212605	0.318076	-0.313233	-0.104701	-0.602961	0.34557	0.1804	0.149306	0.273251	0.00597935	-0.107857	0.0850457	-0.386559	0.388543	-1.02431	0.249249
-4.89904	-0.259244	-0.0116024	0.967346	0.512667	0.0664998	-0.785877	-0.21257	0.318006	-0.312667	-0.104827	-0.600786	0.345221	0.180381	0.149446	0.274003	0.00516897	-0.108166	0.0851456	-0.38634	0.388207	-1.02411	0.249354
-4.89856	-0.258929	-0.0116452	0.968007	0.513223	0.066244	-0.784077	-0.212605	0.317886	-0.312528	-0.104548	-0.598573	0.34491	0.180458	0.149393	0.274001	0.00563583	-0.108491	0.0851836	-0.386021	0.38788	-1.02407	0.249475
-4.89808	-0.258118	-0.0118468	0.967648	0.514604	0.0663084	-0.783576	-0.212427	0.317941	-0.312251	-0.10419	-0.59724	0.34566	0.180314	0.149626	0.27397	0.00492941	-0.109075	0.085443	-0.385767	0.388237	-1.02423	0.249496
-4.8976	-0.258196	-0.0112155	0.967345	0.515739	0.0666527	-0.783224	-0.212669	0.317688	-0.310579	-0.103649	-0.595023	0.345362	0.179994	0.149418	0.273968	0.00486747	-0.109524	0.0855392	-0.38553	0.387847	-1.02418	0.249894
-4.89712	-0.257493	-0.0112671	0.967114	0.516652	0.0669617	-0.782828	-0.212672	0.317743	-0.31006	-0.10372	-0.59351	0.344138	0.180012	0.149903	0.274137	0.00523807	-0.109988	0.0858212	-0.385233	0.387757	-1.02401	0.250189
-4.89664	-0.257353	-0.0112992	0.966861	0.51756	0.0671124	-0.782878	-0.212898	0.317551	-0.310114	-0.103299	-0.591452	0.343812	0.180342	0.150411	0.274152	0.00501257	-0.110456	0.0858115	-0.385428	0.387589	-1.02434	0.250476
-4.89616	-0.256667	-0.0104893	0.966436	0.518079	0.0672443	-0.78254	-0.21284	0.317596	-0.310451	-0.102956	-0.590373	0.343099	0.180282	0.150778	0.27424	0.00406083	-0.110624	0.0859329	-0.38501	0.387008	-1.02484	0.250514
-4.89568	-0.256892	-0.0104402	0.966474	0.518907	0.0673194	-0.781736	-0.213144	0.317538	-0.309666	-0.102573	-0.588618	0.34279	0.180258	0.151172	0.274445	0.00349933	-0.110878	0.0862579	-0.384776	0.386671	-1.02461	0.250865
-4.8952	-0.256638	-0.0103965	0.966474	0.520469	0.0681391	-0.781795	-0.213305	0.31744	-0.309477	-0.101943	-0.586514	0.341678	0.180286	0.15145	0.274544	0.00349993	-0.11125	0.0865827	-0.384697	0.38594	-1.0244	0.250753
-4.89472	-0.255585	-0.0100905	0.966694	0.52245	0.0692495	-0.780663	-0.213084	0.317237	-0.310033	-0.101576	-0.58489	0.340794	0.180431	0.151625	0.274702	0.00323225	-0.111531	0.0867391	-0.384482	0.385862	-1.02483	0.251064
-4.89424	-0.255788	-0.00929432	0.96701	0.523097	0.0697628	-0.779491	-0.213314	0.317023	-0.309682	-0.101547	-0.579348	0.340367	0.180466	0.152054	0.274824	0.00308552	-0.111575	0.0871009	-0.384568	0.385903	-1.02487	0.251306
-4.89376	-0.25585	-0.00858948	0.96712	0.523706	0.0703519	-0.779154	-0.212855	0.317096	-0.309883	-0.101166	-0.577432	0.339575	0.180504	0.15235	0.274568	0.002732	-0.111924	0.0873158	-0.384508	0.385702	-1.02464	0.251371
-4.89328	-0.256378	-0.00810991	0.967777	0.525018	0.0713651	-0.777392	-0.212788	0.316928	-0.309971	-0.100316	-0.575126	0.339434	0.180648	0.153023	0.274519	0.00310165	-0.112254	0.0874219	-0.384375	0.385274	-1.02448	0.251814
-4.8928	-0.257095	-0.00789892	0.967349	0.526229	0.0719304	-0.776433	-0.21252	0.316936	-0.309405	-0.099976	-0.573232	0.33911	0.180455	0.153777	0.275094	0.00306396	-0.112597	0.0877813	-0.384046	0.384835	-1.02367	0.251708
-4.89232	-0.25742	-0.00733148	0.967416	0.52695	0.0727117	-0.775307	-0.212205	0.316687	-0.308925	-0.099976	-0.571583	0.338425	0.180489	0.154257	0.275437	0.00306361	-0.112854	0.0879176	-0.383827	0.38459	-1.02354	0.251657
-4.89184	-0.257201	-0.00664432	0.967668	0.528081	0.0731271	-0.774702	-0.212628	0.316792	-0.308701	-0.098979	-0.56983	0.338347	0.180295	0.154627	0.275792	0.00298819	-0.112947	0.0881786	-0.383789	0.384617	-1.02319	0.251724
-4.89136	-0.257843	-0.00632443	0.96722	0.528045	0.0736901	-0.772647	-0.212414	0.316798	-0.308234	-0.0987135	-0.567054	0.337481	0.180449	0.155018	0.275974	0.00283702	-0.113063	0.08841	-0.383352	0.38436	-1.02341	0.251731
-4.89088	-0.258475	-0.00607337	0.966962	0.529971	0.0739927	-0.772119	-0.212066	0.31664	-0.307989	-0.0985861	-0.566058	0.336742	0.180608	0.155656	0.275763	0.00289345	-0.113348	0.0887856	-0.383037	0.38414	-1.0234	0.251852
-4.8904	-0.259282	-0.00540424	0.966679	0.531307	0.0745519	-0.771747	-0.21102	0.316313	-0.307456	-0.0986038	-0.564685	0.336047	0.180497	0.155795	0.275627	0.0025477	-0.113636	0.0889012	-0.382847	0.384132	-1.02326	0.252013
-4.88992	-0.260024	-0.00503597	0.966331	0.533538	0.0753096	-0.771457	-0.210824	0.316201	-0.307375	-0.0975014	-0.563408	0.33544	0.180537	0.155855	0.276316	0.00239331	-0.113744	0.0893446	-0.382708	0.383518	-1.02319	0.252195
-4.88944	-0.261303	-0.00558222	0.966127	0.536018	0.0756104	-0.771439	-0.210559	0.316182	-0.30675	-0.0969365	-0.561688	0.335292	0.18043	0.155868	0.276065	0.00273963	-0.114075	0.0896288	-0.382716	0.382908	-1.02391	0.252526
-4.88896	-0.261319	-0.0050727	0.966077	0.53644	0.0760085	-0.770921	-0.210377	0.316152	-0.306275	-0.0966656	-0.560195	0.335729	0.18059	0.15593	0.275935	0.00290059	-0.114222	0.089739	-0.382867	0.382638	-1.02416	0.252628
-4.88848	-0.262251	-0.00522954	0.96587	0.537961	0.0764434	-0.770821	-0.210977	0.31623	-0.305584	-0.0963165	-0.55866	0.33533	0.180867	0.155842	0.276268	0.00262944	-0.114556	0.0898502	-0.382442	0.382777	-1.02424	0.252471
-4.888	-0.262264	-0.00481216	0.965856	0.538641	0.0767956	-0.770603	-0.210893	0.316071	-0.306136	-0.0948818	-0.557288	0.334856	0.180981	0.155749	0.276513	0.00238247	-0.114559	0.0898751	-0.38228	0.382495	-1.02401	0.252677
-4.88752	-0.262608	-0.00427904	0.966071	0.539758	0.0771981	-0.769866	-0.211268	0.316025	-0.306999	-0.094277	-0.555993	0.334517	0.181127	0.155439	0.277058	0.00239855	-0.114636	0.0898272	-0.382307	0.381931	-1.02422	0.252853
-4.88704	-0.262549	-0.00344339	0.965621	0.540775	0.0774456	-0.769402	-0.211421	0.316087	-0.307554	-0.0936015	-0.554952	0.334399	0.181136	0.155516	0.277484	0.00174849	-0.114909	0.0898	-0.382213	0.381869	-1.02458	0.253059
-4.88656	-0.262983	-0.0028938	0.965764	0.540485	0.078075	-0.769542	-0.210579	0.316005	-0.307868	-0.0931945	-0.552681	0.334524	0.180978	0.1551	0.277816	0.00179713	-0.115012	0.0898611	-0.38193	0.381809	-1.02466	0.253582
-4.88608	-0.263001	-0.00247776	0.965985	0.541883	0.0783283	-0.769881	-0.210106	0.315858	-0.308266	-0.0926094	-0.549989	0.33418	0.180827	0.155355	0.278028	0.00158345	-0.115109	0.089478	-0.381752	0.381248	-1.02517	0.253635
-4.8856	-0.262641	-0.00216769	0.966089	0.543129	0.079084	-0.769486	-0.209803	0.315822	-0.308803	-0.09181	-0.544722	0.334303	0.180919	0.155435	0.278504	0.000638226	-0.115304	0.0897244	-0.38179	0.381022	-1.02472	0.253719
-4.88512	-0.26337	-0.00168799	0.966314	0.543577	0.0796982	-0.769798	-0.210068	0.315761	-0.308977	-0.0916237	-0.543436	0.333777	0.181023	0.155125	0.278854	0.000248827	-0.115526	0.0893837	-0.381649	0.380905	-1.02452	0.253485
-4.88464	-0.264206	-0.000635299	0.965633	0.544977	0.0805132	-0.768881	-0.209916	0.315868	-0.308622	-0.0913916	-0.542284	0.333663	0.181051	0.154439	0.27948	0.000401987	-0.115544	0.0892306	-0.381297	0.38071	-1.02508	0.253286
-4.88416	-0.263746	-0.000139355	0.965117	0.545564	0.0811888	-0.769295	-0.209976	0.316	-0.309108	-0.0913023	-0.539528	0.333288	0.180826	0.153916	0.279787	0.00018564	-0.115478	0.0896336	-0.380964	0.380742	-1.02483	0.253254
-4.88368	-0.263786	0.000460296	0.964293	0.545969	0.0818502	-0.768777	-0.209484	0.315961	-0.309167	-0.091402	-0.538447	0.333092	0.1806	0.153752	0.280227	-0.00014316	-0.115414	0.0895309	-0.380488	0.38085	-1.02508	0.253387
-4.8832	-0.263892	0.000916473	0.963961	0.547358	0.0819644	-0.769199	-0.209627	0.316046	-0.309328	-0.0909476	-0.537318	0.332611	0.180523	0.153319	0.280099	-0.000308282	-0.1158	0.0895214	-0.380334	0.380918	-1.02466	0.253333
-4.88272	-0.263676	0.00131745	0.964064	0.548222	0.0823604	-0.769862	-0.209625	0.316065	-0.309591	-0.0905363	-0.536687	0.331531	0.180292	0.153085	0.280482	-0.000457627	-0.115815	0.0895604	-0.380039	0.38098	-1.02459	0.253398
-4.88224	-0.264332	0.00135334	0.963871	0.549544	0.0832394	-0.769542	-0.209039	0.316155	-0.309844	-0.09016	-0.535725	0.331137	0.180192	0.152789	0.280894	-0.00064324	-0.115993	0.0901548	-0.379849	0.380973	-1.02526	0.253279
-4.88176	-0.264666	0.00209167	0.96393	0.550271	0.08314	-0.770239	-0.20893	0.316069	-0.31038	-0.0897883	-0.534042	0.330574	0.179915	0.153168	0.280802	-0.000932802	-0.116127	0.0897922	-0.379632	0.3809	-1.02536	0.253231
-4.88128	-0.26615	0.00210274	0.964469	0.550274	0.0836508	-0.770735	-0.208995	0.315828	-0.310368	-0.0893237	-0.533308	0.330527	0.179781	0.15341	0.281212	-0.00140969	-0.116359	0.0899687	-0.379199	0.380892	-1.02558	0.253394
-4.8808	-0.26611	0.00210882	0.964627	0.550527	0.0839512	-0.77006	-0.208691	0.315657	-0.311131	-0.0888714	-0.532798	0.330487	0.179617	0.153126	0.280966	-0.0014837	-0.116704	0.0896974	-0.379155	0.380885	-1.02521	0.253312
-4.88032	-0.266437	0.00261087	0.964596	0.549923	0.0841315	-0.769815	-0.209046	0.315511	-0.310514	-0.0887554	-0.531586	0.330058	0.179589	0.152808	0.28118	-0.00177416	-0.11689	0.0893385	-0.378895	0.380852	-1.02518	0.253077
-4.87984	-0.2666	0.00257377	0.965094	0.55	0.0847278	-0.769433	-0.209161	0.315444	-0.311311	-0.0884575	-0.530764	0.329838	0.179262	0.152936	0.281553	-0.00165495	-0.117368	0.0890782	-0.378928	0.380576	-1.02506	0.253416
-4.87936	-0.266383	0.00244816	0.964502	0.550922	0.0852512	-0.769384	-0.208645	0.31561	-0.31176	-0.0879881	-0.529033	0.329818	0.179121	0.152915	0.281694	-0.00155204	-0.117429	0.0888644	-0.378614	0.38041	-1.02538	0.253391
-4.87888	-0.266669	0.00255551	0.963983	0.552123	0.0853854	-0.769048	-0.208421	0.315455	-0.311484	-0.0877666	-0.528608	0.328815	0.178821	0.153012	0.281448	-0.00112307	-0.117659	0.0886396	-0.378453	0.380837	-1.02487	0.253431
-4.8784	-0.266475	0.00209042	0.9636	0.551433	0.0858252	-0.769628	-0.20849	0.315259	-0.312301	-0.0873255	-0.528724	0.328149	0.178721	0.15325	0.280958	-0.000633403	-0.118232	0.0886631	-0.378313	0.380519	-1.02492	0.253675
-4.87792	-0.266753	0.00260081	0.96286	0.54997	0.0863839	-0.770934	-0.208202	0.315386	-0.312568	-0.0867194	-0.528242	0.327882	0.178439	0.153312	0.280529	-0.00123555	-0.11838	0.0889545	-0.378269	0.380295	-1.02516	0.253661
-4.87744	-0.267223	0.00229621	0.962234	0.549487	0.0868007	-0.770883	-0.208632	0.315465	-0.312724	-0.0862997	-0.527491	0.326905	0.17836	0.15328	0.280596	-0.0015858	-0.118605	0.0888652	-0.377892	0.380415	-1.0255	0.253574
-4.87696	-0.26776	0.00238074	0.961657	0.548869	0.0874744	-0.771334	-0.208579	0.315464	-0.313288	-0.0860592	-0.526845	0.326682	0.17846	0.153202	0.280355	-0.00142449	-0.118754	0.088739	-0.377583	0.380536	-1.02525	0.253535
-4.87648	-0.268236	0.00216445	0.961706	0.549619	0.087883	-0.771417	-0.209167	0.315416	-0.313459	-0.0857909	-0.526213	0.326448	0.178478	0.153106	0.280491	-0.00137555	-0.118806	0.0889183	-0.377099	0.380407	-1.025	0.253579
-4.876	-0.268846	0.00244384	0.961243	0.549868	0.0886932	-0.772041	-0.209518	0.31557	-0.315303	-0.0852029	-0.525684	0.325666	0.178207	0.152756	0.280188	-0.00162751	-0.119184	0.089336	-0.376461	0.380326	-1.02496	0.253295
-4.87552	-0.268286	0.00244947	0.961058	0.550536	0.0893854	-0.77169	-0.209885	0.315754	-0.316318	-0.0851618	-0.525543	0.325573	0.177998	0.152779	0.279941	-0.00169288	-0.119802	0.089363	-0.376308	0.380314	-1.02568	0.253385
-4.87504	-0.268707	0.00258113	0.96056	0.550857	0.0900828	-0.772214	-0.210271	0.315707	-0.316764	-0.0849547	-0.524514	0.324674	0.178013	0.152759	0.279871	-0.00156964	-0.120013	0.0893383	-0.375985	0.380516	-1.02557	0.253303
-4.87456	-0.268455	0.00234388	0.960768	0.551209	0.0908749	-0.773033	-0.211046	0.315782	-0.318603	-0.0844945	-0.524759	0.324209	0.178131	0.152577	0.279879	-0.00127495	-0.120611	0.0897566	-0.375764	0.380558	-1.02547	0.253147
-4.87408	-0.268655	0.00241926	0.960401	0.551464	0.0908791	-0.772962	-0.210987	0.315882	-0.320408	-0.0839892	-0.523151	0.323405	0.178099	0.152697	0.279917	-0.00151127	-0.120901	0.089572	-0.375628	0.380621	-1.02577	0.252982
-4.8736	-0.268809	0.00306911	0.960126	0.551644	0.0909376	-0.772667	-0.211651	0.316015	-0.321939	-0.0841934	-0.522166	0.322179	0.177967	0.152958	0.280329	-0.00108585	-0.121286	0.0895436	-0.37559	0.380394	-1.02555	0.252644
-4.87312	-0.268632	0.00316671	0.95945	0.55188	0.0917736	-0.773582	-0.21193	0.316119	-0.322836	-0.083866	-0.520702	0.321273	0.178117	0.153094	0.279884	-0.00142414	-0.121468	0.0897517	-0.375246	0.380702	-1.02557	0.252415
-4.87264	-0.269472	0.0029548	0.959555	0.552023	0.0924321	-0.773259	-0.212096	0.316144	-0.324429	-0.0837728	-0.519892	0.320135	0.178275	0.15315	0.279682	-0.00133547	-0.121681	0.0899604	-0.375134	0.380877	-1.02553	0.252317
-4.87216	-0.269491	0.003325	0.959719	0.552646	0.0929441	-0.774562	-0.211791	0.316207	-0.324742	-0.0834238	-0.519506	0.31951	0.178051	0.153527	0.280038	-0.00124346	-0.121981	0.0896236	-0.37506	0.381038	-1.02561	0.252391
-4.87168	-0.269704	0.00305358	0.959548	0.553417	0.0930875	-0.774712	-0.211994	0.316186	-0.326595	-0.0829012	-0.518928	0.319077	0.178143	0.153261	0.279739	-0.00188838	-0.122325	0.0895828	-0.375034	0.381211	-1.02576	0.252355
-4.8712	-0.269795	0.00296554	0.959465	0.553068	0.0936774	-0.776403	-0.212463	0.316255	-0.328244	-0.0825007	-0.518498	0.318806	0.17815	0.153051	0.279959	-0.00225413	-0.122374	0.089608	-0.374456	0.38143	-1.02574	0.251973
-4.87072	-0.270025	0.00292415	0.959588	0.552875	0.0942414	-0.776298	-0.212582	0.316191	-0.329056	-0.0822115	-0.518418	0.318415	0.177777	0.153243	0.280793	-0.00302029	-0.122627	0.0892963	-0.374115	0.381395	-1.026	0.251808
-4.87024	-0.27005	0.00353052	0.960452	0.554678	0.0952671	-0.776104	-0.212779	0.316267	-0.329368	-0.0821524	-0.517709	0.317824	0.17785	0.153651	0.280757	-0.00383772	-0.123199	0.0893261	-0.373995	0.381395	-1.02591	0.251626
-4.86976	-0.27	0.00311559	0.961031	0.555384	0.0951755	-0.776257	-0.213586	0.316187	-0.329713	-0.081989	-0.518083	0.317533	0.177787	0.153866	0.280654	-0.00394246	-0.12339	0.089237	-0.374002	0.381524	-1.02616	0.251661
-4.86928	-0.269839	0.00342631	0.961013	0.555747	0.0956109	-0.776431	-0.213731	0.316161	-0.330409	-0.0810612	-0.518402	0.317128	0.177542	0.153868	0.280773	-0.00416227	-0.123394	0.0894743	-0.373937	0.381209	-1.02634	0.251267
-4.8688	-0.270065	0.00416413	0.961519	0.557134	0.0957844	-0.777796	-0.21431	0.316011	-0.330449	-0.0810999	-0.518592	0.317059	0.177665	0.153697	0.280877	-0.00425104	-0.123454	0.0896817	-0.373664	0.381035	-1.02581	0.251205
-4.86832	-0.270981	0.00462351	0.961913	0.557743	0.0966471	-0.77835	-0.215337	0.316018	-0.330519	-0.0805363	-0.519365	0.316758	0.177815	0.153365	0.281013	-0.00435617	-0.123825	0.089678	-0.373598	0.380482	-1.02539	0.250788
-4.86784	-0.271322	0.0042309	0.962725	0.557149	0.0974028	-0.778933	-0.215439	0.315866	-0.330718	-0.0800299	-0.51925	0.316616	0.177819	0.153428	0.280764	-0.00507161	-0.124212	0.0895079	-0.373323	0.380238	-1.02571	0.250549
-4.86736	-0.271633	0.004683	0.963081	0.558332	0.0974078	-0.778981	-0.215784	0.315711	-0.331131	-0.0796287	-0.518817	0.31618	0.178198	0.153353	0.280319	-0.00559221	-0.124431	0.0897769	-0.373297	0.380233	-1.02495	0.250342
-4.86688	-0.2719	0.00493402	0.963686	0.559749	0.0984399	-0.778559	-0.216219	0.315938	-0.331552	-0.0792631	-0.519201	0.316122	0.178154	0.153601	0.280304	-0.00537246	-0.12475	0.0901504	-0.373104	0.380142	-1.02425	0.250232
-4.8664	-0.27176	0.00570746	0.964086	0.560044	0.0991708	-0.777489	-0.216224	0.315799	-0.332283	-0.0790261	-0.519455	0.315181	0.178364	0.153754	0.279885	-0.00565543	-0.124852	0.0900502	-0.373161	0.380379	-1.02381	0.249879
-4.86592	-0.271559	0.00588743	0.964935	0.56045	0.100457	-0.776522	-0.216617	0.315912	-0.331999	-0.0788526	-0.519059	0.314564	0.178507	0.153842	0.279488	-0.0062021	-0.125301	0.0903183	-0.373021	0.380528	-1.02349	0.249548
-4.86544	-0.271979	0.00533187	0.965009	0.560718	0.100789	-0.775353	-0.21651	0.315827	-0.332721	-0.0784747	-0.518695	0.314202	0.178831	0.153477	0.279622	-0.00629441	-0.12565	0.0908678	-0.372994	0.380817	-1.02353	0.249025
-4.86496	-0.272171	0.00451792	0.964883	0.560946	0.101244	-0.774561	-0.216744	0.315829	-0.3331	-0.0786079	-0.51958	0.313838	0.179089	0.153266	0.279148	-0.00670656	-0.125755	0.0905709	-0.372857	0.381236	-1.02442	0.249061
-4.86448	-0.27274	0.00448956	0.965749	0.560899	0.10217	-0.772551	-0.216752	0.31581	-0.332966	-0.0782636	-0.520163	0.313312	0.178999	0.153106	0.278694	-0.0068228	-0.125879	0.0906069	-0.372533	0.381702	-1.02463	0.24888
-4.864	-0.273139	0.00425005	0.965521	0.562564	0.102292	-0.77095	-0.21671	0.315703	-0.333896	-0.0779227	-0.521031	0.313326	0.179597	0.153183	0.278246	-0.00687858	-0.126009	0.090899	-0.372355	0.382314	-1.02453	0.248287
-4.86352	-0.27344	0.00450327	0.967128	0.563033	0.103149	-0.77035	-0.217345	0.315589	-0.334968	-0.0778602	-0.521505	0.313323	0.179861	0.1533	0.277854	-0.00694144	-0.126201	0.0911989	-0.372421	0.382515	-1.02436	0.247955
-4.86304	-0.274469	0.00393511	0.967699	0.563146	0.103572	-0.77009	-0.217	0.315611	-0.33574	-0.0772958	-0.521978	0.312712	0.180192	0.153344	0.27724	-0.00697569	-0.126511	0.0907229	-0.372433	0.38262	-1.02428	0.247694
-4.86256	-0.276239	0.00404797	0.96766	0.563438	0.104394	-0.769283	-0.216386	0.315608	-0.336163	-0.0767317	-0.521689	0.311902	0.180196	0.15303	0.276726	-0.00692695	-0.126519	0.0907025	-0.372298	0.382485	-1.02408	0.247952
-4.86208	-0.27784	0.00392975	0.968529	0.564255	0.104974	-0.768393	-0.216873	0.315706	-0.336885	-0.0761993	-0.522327	0.311082	0.180508	0.152992	0.276283	-0.00721534	-0.126279	0.0905662	-0.371902	0.382837	-1.02388	0.247781
-4.8616	-0.278365	0.00335177	0.968788	0.56404	0.106345	-0.768054	-0.216777	0.315793	-0.337043	-0.0760024	-0.522408	0.310923	0.180725	0.152961	0.27622	-0.00705188	-0.126454	0.0906096	-0.371916	0.383235	-1.02431	0.247024
-4.86112	-0.278944	0.00367163	0.969175	0.563677	0.107076	-0.767784	-0.217042	0.315717	-0.337461	-0.0753193	-0.522519	0.309615	0.180718	0.153071	0.275709	-0.00787078	-0.126637	0.09057	-0.371558	0.383909	-1.0249	0.246872
-4.86064	-0.279519	0.00340966	0.969605	0.56383	0.10759	-0.767027	-0.217197	0.315856	-0.338367	-0.0750677	-0.524504	0.308729	0.180636	0.152971	0.275229	-0.00810212	-0.12691	0.0910785	-0.371299	0.384559	-1.02511	0.246566
-4.86016	-0.280105	0.0034785	0.969049	0.56505	0.108012	-0.766747	-0.217214	0.316043	-0.338809	-0.0746672	-0.525117	0.308443	0.180768	0.152738	0.27545	-0.00815986	-0.126847	0.0911489	-0.371016	0.384754	-1.02524	0.246397
-4.85968	-0.280608	0.00361005	0.968972	0.56521	0.108324	-0.766217	-0.217564	0.31607	-0.339675	-0.0738479	-0.525763	0.308721	0.181071	0.153413	0.274927	-0.00848312	-0.127105	0.0907567	-0.371009	0.385174	-1.02537	0.246502
-4.8592	-0.281333	0.00406262	0.969298	0.566553	0.10917	-0.765443	-0.217228	0.315968	-0.339459	-0.073868	-0.527078	0.308385	0.181362	0.153645	0.275032	-0.00918236	-0.12716	0.0906687	-0.371027	0.385271	-1.02591	0.245942
-4.85872	-0.281825	0.00417554	0.969699	0.567035	0.109161	-0.764679	-0.217158	0.315939	-0.34006	-0.0739433	-0.527067	0.307632	0.181524	0.153428	0.275183	-0.0094489	-0.127177	0.0908067	-0.371024	0.385414	-1.02578	0.245877
-4.85824	-0.28273	0.00418945	0.970331	0.566037	0.110039	-0.763602	-0.216557	0.315874	-0.340942	-0.0738178	-0.527036	0.306637	0.181502	0.153345	0.275057	-0.0105112	-0.127219	0.0913791	-0.370904	0.385541	-1.02598	0.24616
-4.85776	-0.282918	0.00426743	0.969648	0.566903	0.110656	-0.764295	-0.216712	0.315841	-0.34152	-0.0737482	-0.528372	0.305906	0.181807	0.153669	0.274336	-0.0101471	-0.127307	0.0913021	-0.370629	0.385608	-1.02585	0.245953
-4.85728	-0.282579	0.0047232	0.969519	0.567234	0.111198	-0.763827	-0.216805	0.316091	-0.342326	-0.073705	-0.530007	0.305737	0.181928	0.153094	0.274584	-0.0108188	-0.12753	0.0915046	-0.370504	0.38577	-1.02568	0.246025
-4.8568	-0.283396	0.00507135	0.969511	0.5672	0.112164	-0.762261	-0.216762	0.316253	-0.342472	-0.0732417	-0.531054	0.305133	0.182297	0.153056	0.274523	-0.0106604	-0.127394	0.091675	-0.370423	0.386033	-1.02584	0.245552
-4.85632	-0.284225	0.00553158	0.969912	0.56726	0.112413	-0.760854	-0.217083	0.316418	-0.343215	-0.0727296	-0.53227	0.304924	0.182405	0.152854	0.274229	-0.0107326	-0.127276	0.0921697	-0.369949	0.386137	-1.02678	0.245472
-4.85584	-0.284807	0.00488383	0.97008	0.568203	0.112763	-0.761193	-0.21657	0.316578	-0.343795	-0.072588	-0.531934	0.304184	0.182578	0.153045	0.273657	-0.0116375	-0.127157	0.0919806	-0.370066	0.386681	-1.02661	0.245414
-4.85536	-0.285283	0.00529298	0.970602	0.568886	0.113378	-0.760517	-0.216107	0.316612	-0.344463	-0.0725626	-0.533659	0.303661	0.182887	0.152676	0.273556	-0.0116246	-0.12728	0.091589	-0.370079	0.387163	-1.0271	0.245303
-4.85488	-0.28462	0.0049427	0.970396	0.568181	0.113934	-0.760865	-0.216427	0.316691	-0.345033	-0.0723497	-0.534206	0.303461	0.182814	0.152641	0.273463	-0.0110882	-0.127548	0.0915434	-0.369875	0.387287	-1.02612	0.245203
-4.8544	-0.284505	0.00478964	0.971001	0.568563	0.114125	-0.759884	-0.216448	0.316727	-0.344727	-0.0715736	-0.534545	0.302758	0.182946	0.152742	0.27353	-0.0107857	-0.127758	0.0918158	-0.369866	0.387266	-1.0261	0.2453
-4.85392	-0.284563	0.00448217	0.971499	0.56933	0.114926	-0.760245	-0.216985	0.316988	-0.345624	-0.0714067	-0.534637	0.302655	0.182671	0.152818	0.2731	-0.0105723	-0.127717	0.0919312	-0.369823	0.387179	-1.02561	0.245654
-4.85344	-0.284622	0.00426034	0.97132	0.568855	0.114897	-0.759799	-0.216678	0.31688	-0.346107	-0.0716827	-0.535963	0.3029	0.183131	0.153023	0.273307	-0.0108813	-0.127529	0.0919846	-0.369564	0.38774	-1.02577	0.246029
-4.85296	-0.285208	0.00455239	0.971308	0.567723	0.115337	-0.758876	-0.217195	0.317014	-0.346423	-0.0714385	-0.536321	0.302594	0.1833	0.152005	0.273488	-0.0107084	-0.127697	0.0922555	-0.369297	0.387822	-1.02515	0.245836
-4.85248	-0.285434	0.004363	0.970945	0.568178	0.116402	-0.757975	-0.216985	0.317232	-0.346471	-0.071163	-0.536703	0.302723	0.182946	0.151373	0.273806	-0.0108488	-0.127892	0.0924242	-0.368878	0.388253	-1.02515	0.245991
-4.852	-0.286238	0.00417959	0.970181	0.56985	0.116927	-0.758072	-0.217385	0.317436	-0.346405	-0.0698743	-0.536324	0.302713	0.18279	0.151027	0.274057	-0.0106662	-0.127681	0.0928709	-0.368845	0.38839	-1.02501	0.246031
-4.85152	-0.286499	0.00388677	0.970177	0.570581	0.117438	-0.757429	-0.216853	0.317579	-0.346938	-0.0694314	-0.536673	0.303117	0.182926	0.150637	0.274152	-0.0104667	-0.127858	0.0933421	-0.368619	0.388754	-1.02494	0.246113
-4.85104	-0.286605	0.00325468	0.970935	0.570544	0.118113	-0.756092	-0.216654	0.317958	-0.347444	-0.0692013	-0.537534	0.303068	0.183114	0.150068	0.273972	-0.0103	-0.128165	0.093194	-0.368649	0.389034	-1.02513	0.24611
-4.85056	-0.287081	0.0032299	0.970681	0.571055	0.11921	-0.755491	-0.216829	0.318208	-0.348195	-0.0696198	-0.536092	0.303096	0.183436	0.150197	0.274527	-0.00998715	-0.128335	0.0934584	-0.368679	0.38946	-1.02511	0.246025
-4.85008	-0.287891	0.00257995	0.971026	0.572124	0.119649	-0.755541	-0.217418	0.318321	-0.348203	-0.0693806	-0.536761	0.302755	0.1832	0.150474	0.275178	-0.0096392	-0.128639	0.0933664	-0.368235	0.389553	-1.02498	0.245683
-4.8496	-0.287767	0.00245542	0.970799	0.573932	0.120565	-0.754657	-0.217557	0.318248	-0.348269	-0.0695129	-0.537351	0.303069	0.183202	0.150287	0.276121	-0.00947909	-0.128688	0.0934613	-0.368041	0.39006	-1.0248	0.245357
-4.84912	-0.287695	0.00220041	0.970014	0.57528	0.121366	-0.755135	-0.217444	0.318585	-0.349155	-0.0690717	-0.537234	0.302392	0.183439	0.150685	0.276347	-0.00908443	-0.128783	0.0938454	-0.367735	0.390781	-1.02452	0.245246
-4.84864	-0.28786	0.00181613	0.969778	0.575573	0.122237	-0.754813	-0.217108	0.318465	-0.349024	-0.0683373	-0.536967	0.302321	0.184302	0.150788	0.276995	-0.00943018	-0.128894	0.0942507	-0.367596	0.390991	-1.02494	0.245238
-4.84816	-0.288114	0.00160079	0.969091	0.575699	0.122281	-0.753401	-0.216789	0.318636	-0.348253	-0.0681624	-0.538419	0.30202	0.184736	0.150767	0.277361	-0.00993775	-0.129077	0.0945945	-0.367442	0.391177	-1.02457	0.245275
-4.84768	-0.28777	0.00151379	0.968778	0.575887	0.12213	-0.752501	-0.216764	0.318801	-0.347767	-0.068006	-0.538632	0.30181	0.184989	0.150735	0.278517	-0.0103395	-0.129251	0.0949241	-0.367602	0.392073	-1.02416	0.245243
-4.8472	-0.287782	0.00199677	0.968534	0.57647	0.122443	-0.751474	-0.216073	0.31903	-0.348255	-0.0677014	-0.539128	0.301649	0.185414	0.150314	0.278735	-0.0103178	-0.12934	0.0951424	-0.367498	0.392538	-1.02449	0.245177
-4.84672	-0.287479	0.000997763	0.968256	0.577018	0.122595	-0.751179	-0.215712	0.319205	-0.348232	-0.0675987	-0.539221	0.301798	0.185646	0.150687	0.278999	-0.0108497	-0.129335	0.0954136	-0.367459	0.393232	-1.02416	0.245094
-4.84624	-0.287128	0.000995906	0.96768	0.577744	0.123126	-0.752198	-0.215971	0.319275	-0.348045	-0.0670748	-0.539502	0.300657	0.186036	0.150306	0.279341	-0.0110594	-0.129315	0.0959435	-0.367264	0.393414	-1.02399	0.245773
-4.84576	-0.287372	0.00103604	0.967376	0.577832	0.123305	-0.752819	-0.215429	0.319526	-0.347952	-0.0664309	-0.539999	0.300767	0.185956	0.150168	0.278741	-0.0116022	-0.129289	0.096339	-0.367611	0.393524	-1.02461	0.245825
-4.84528	-0.287337	0.000782789	0.967302	0.57933	0.123461	-0.752251	-0.215556	0.319798	-0.348115	-0.0660755	-0.53898	0.301057	0.186302	0.150135	0.278384	-0.0109228	-0.129364	0.0967267	-0.367813	0.394154	-1.02502	0.245696
-4.8448	-0.286658	0.000179561	0.967057	0.580471	0.123866	-0.752657	-0.215314	0.319898	-0.348719	-0.0660684	-0.538548	0.300849	0.186533	0.1501	0.278278	-0.0113619	-0.129366	0.0973122	-0.367711	0.394614	-1.02383	0.245728
-4.84432	-0.286167	0.000122509	0.966532	0.581493	0.124113	-0.752945	-0.215342	0.320096	-0.347972	-0.0655761	-0.539658	0.300839	0.186702	0.150194	0.278992	-0.0114913	-0.129541	0.0976973	-0.367676	0.394899	-1.02338	0.245574
-4.84384	-0.285319	-4.06789e-05	0.966141	0.580321	0.124483	-0.752927	-0.215036	0.320015	-0.348611	-0.0652181	-0.540665	0.300461	0.186884	0.150482	0.278824	-0.0126099	-0.129723	0.0977791	-0.36757	0.394885	-1.02285	0.245684
-4.84336	-0.285201	-0.000327288	0.965847	0.580967	0.125085	-0.752955	-0.214485	0.320226	-0.349255	-0.0648797	-0.540433	0.300229	0.186831	0.15033	0.279002	-0.0127493	-0.129808	0.0974844	-0.367305	0.394958	-1.02234	0.245631
-4.84288	-0.284807	-0.000417726	0.965021	0.581774	0.12561	-0.753286	-0.213852	0.320267	-0.349189	-0.0640087	-0.540391	0.300199	0.186929	0.15056	0.278717	-0.0142159	-0.129855	0.0977875	-0.367142	0.395334	-1.02137	0.245431
-4.8424	-0.285052	-0.000308619	0.964784	0.581492	0.126073	-0.753654	-0.212729	0.320283	-0.349966	-0.0629725	-0.540642	0.299404	0.186973	0.150725	0.279203	-0.014494	-0.129885	0.0981105	-0.367262	0.39576	-1.02073	0.245601
-4.84192	-0.285232	-7.37958e-05	0.965165	0.582272	0.12684	-0.75444	-0.211561	0.320464	-0.349846	-0.0623799	-0.540539	0.298709	0.187205	0.150904	0.278813	-0.0153693	-0.129854	0.098702	-0.36688	0.395516	-1.02034	0.245692
-4.84144	-0.285285	0.000269932	0.965923	0.580966	0.12727	-0.75502	-0.211123	0.320501	-0.350142	-0.0617427	-0.540838	0.298608	0.187157	0.151064	0.278499	-0.0159272	-0.129796	0.0988041	-0.366661	0.395828	-1.01974	0.245706
-4.84096	-0.285904	0.000626994	0.965813	0.58068	0.128176	-0.756355	-0.210574	0.320774	-0.351289	-0.0609496	-0.541034	0.29805	0.187343	0.151322	0.278275	-0.0164437	-0.129889	0.0993762	-0.366438	0.396013	-1.01955	0.245476
-4.84048	-0.287402	0.000631889	0.96606	0.580627	0.128795	-0.756802	-0.209637	0.321005	-0.351745	-0.0595161	-0.5409	0.298114	0.187481	0.151333	0.278286	-0.0163792	-0.129849	0.0995381	-0.366138	0.396406	-1.01887	0.245648
-4.84	-0.286967	0.000813341	0.966341	0.580429	0.129402	-0.757835	-0.208601	0.321108	-0.351969	-0.0587103	-0.540455	0.297186	0.187628	0.151683	0.277797	-0.0163022	-0.129789	0.0994916	-0.36587	0.396791	-1.01822	0.245509
-4.83952	-0.288025	0.00104681	0.966867	0.580047	0.129502	-0.759307	-0.207987	0.321241	-0.350858	-0.0575819	-0.540376	0.29703	0.187428	0.151708	0.277675	-0.0172822	-0.130249	0.099823	-0.365857	0.397125	-1.01782	0.24576
-4.83904	-0.288392	0.00161848	0.967563	0.579603	0.129703	-0.760165	-0.207977	0.321207	-0.349936	-0.0569377	-0.542824	0.296265	0.187414	0.151776	0.277087	-0.0185101	-0.130151	0.100185	-0.365809	0.397601	-1.01715	0.245451
-4.83856	-0.289531	0.00180327	0.968009	0.579079	0.1304	-0.759753	-0.207648	0.321202	-0.349979	-0.0557359	-0.543359	0.295929	0.187388	0.151497	0.276971	-0.0181724	-0.130255	0.100506	-0.365384	0.398012	-1.01692	0.245408
-4.83808	-0.290194	0.00164832	0.968251	0.578987	0.131478	-0.759679	-0.207281	0.321171	-0.349548	-0.0552348	-0.543387	0.295962	0.186877	0.151304	0.276883	-0.0187395	-0.130314	0.100679	-0.365261	0.398083	-1.01621	0.245513
-4.8376	-0.290828	0.0015936	0.968246	0.578705	0.132021	-0.760655	-0.206411	0.321263	-0.348901	-0.0545484	-0.543351	0.295749	0.186835	0.151343	0.276792	-0.0192071	-0.130208	0.101512	-0.365244	0.398682	-1.01562	0.245872
-4.83712	-0.290285	0.00147514	0.96814	0.577896	0.132976	-0.760806	-0.206069	0.321074	-0.348034	-0.0533172	-0.543913	0.295365	0.186722	0.151774	0.276424	-0.0199305	-0.130207	0.10198	-0.36484	0.399106	-1.01444	0.24593
-4.83664	-0.290262	0.00192852	0.96851	0.575669	0.133394	-0.761566	-0.205474	0.320989	-0.348168	-0.0527409	-0.544169	0.29469	0.187046	0.151637	0.275847	-0.0197314	-0.130394	0.102743	-0.364845	0.399513	-1.01383	0.246056
-4.83616	-0.290971	0.00182636	0.968573	0.575273	0.133928	-0.76274	-0.204984	0.320871	-0.347903	-0.0520185	-0.543992	0.293713	0.187212	0.151694	0.275425	-0.0196823	-0.130421	0.103082	-0.364827	0.399813	-1.01325	0.245743
-4.83568	-0.290863	0.00152058	0.968786	0.57464	0.134275	-0.762281	-0.20389	0.320837	-0.348325	-0.0511076	-0.543989	0.29357	0.187243	0.152018	0.275155	-0.0198617	-0.130934	0.103076	-0.364659	0.400165	-1.01298	0.245598
-4.8352	-0.291111	0.00119765	0.968336	0.573374	0.134843	-0.76159	-0.203365	0.320828	-0.348247	-0.0505643	-0.543388	0.292967	0.187443	0.152427	0.275208	-0.0207065	-0.131191	0.103395	-0.364457	0.400057	-1.01273	0.245696
-4.83472	-0.290184	0.00146407	0.968176	0.573415	0.135539	-0.761876	-0.202555	0.32075	-0.348115	-0.0501943	-0.544729	0.292159	0.187471	0.152102	0.275149	-0.0211107	-0.131389	0.1037	-0.364349	0.399758	-1.01227	0.245767
-4.83424	-0.29016	0.00143254	0.967123	0.573546	0.136293	-0.76202	-0.201518	0.320519	-0.348506	-0.0495031	-0.54515	0.291806	0.187476	0.151873	0.274968	-0.0212467	-0.131464	0.104227	-0.364367	0.400469	-1.01174	0.245677
-4.83376	-0.290118	0.00158718	0.968022	0.573138	0.137241	-0.761966	-0.201299	0.320553	-0.34898	-0.0493078	-0.544922	0.29122	0.187514	0.151798	0.27506	-0.0214528	-0.131578	0.104864	-0.364388	0.400659	-1.01079	0.245763
-4.83328	-0.290534	0.00190948	0.968207	0.57263	0.13771	-0.762325	-0.201246	0.320594	-0.349131	-0.0489769	-0.544603	0.290986	0.187689	0.152905	0.274236	-0.0213763	-0.131694	0.105768	-0.364113	0.400956	-1.01055	0.245898
-4.8328	-0.28997	0.00198516	0.96875	0.572424	0.138588	-0.762292	-0.200223	0.320458	-0.349004	-0.0481525	-0.544573	0.289957	0.187972	0.153382	0.27414	-0.0217573	-0.131411	0.106055	-0.363947	0.401393	-1.00968	0.246038
-4.83232	-0.290084	0.00168015	0.9691	0.572712	0.139403	-0.762886	-0.198997	0.320218	-0.348693	-0.0473425	-0.545597	0.288604	0.188259	0.153343	0.274211	-0.0218858	-0.131611	0.10658	-0.363769	0.401607	-1.00893	0.245421
-4.83184	-0.2894	0.00187167	0.96864	0.572163	0.139873	-0.763466	-0.197883	0.320249	-0.349865	-0.0467953	-0.545375	0.287749	0.188494	0.153795	0.273621	-0.0224476	-0.131749	0.107161	-0.363806	0.402104	-1.00762	0.245533
-4.83136	-0.289256	0.00176195	0.968122	0.571399	0.140754	-0.76368	-0.196841	0.320086	-0.349378	-0.0463875	-0.546261	0.287444	0.188855	0.154302	0.274193	-0.0225564	-0.132208	0.107644	-0.363565	0.402162	-1.00792	0.245423
-4.83088	-0.289277	0.00156855	0.968779	0.571577	0.141573	-0.763065	-0.196402	0.319932	-0.348876	-0.0456176	-0.546506	0.286758	0.189026	0.154146	0.274536	-0.022619	-0.132519	0.1083	-0.363146	0.402292	-1.0074	0.24512
-4.8304	-0.289506	0.00149712	0.968673	0.571909	0.142366	-0.762984	-0.195681	0.320081	-0.348829	-0.0449261	-0.546042	0.285636	0.189209	0.154449	0.274533	-0.0229966	-0.133017	0.108852	-0.362752	0.402568	-1.00713	0.245186
-4.82992	-0.28964	0.00113134	0.968758	0.571998	0.142713	-0.762821	-0.195079	0.320175	-0.348391	-0.0440041	-0.544913	0.285115	0.189392	0.154704	0.274647	-0.023575	-0.133349	0.10949	-0.362354	0.402494	-1.00684	0.245287
-4.82944	-0.290478	0.000833427	0.968861	0.572071	0.143839	-0.763341	-0.193816	0.320403	-0.347636	-0.0434157	-0.544673	0.284326	0.189829	0.154383	0.274735	-0.0241154	-0.133937	0.110006	-0.362022	0.402841	-1.00666	0.245567
-4.82896	-0.289928	0.000813341	0.969463	0.57206	0.144901	-0.763598	-0.193047	0.320498	-0.346978	-0.042795	-0.543522	0.283219	0.189876	0.154371	0.275065	-0.0240589	-0.134258	0.110721	-0.361817	0.402889	-1.00632	0.245958
-4.82848	-0.289759	0.000758787	0.970353	0.571876	0.145636	-0.764087	-0.192665	0.320459	-0.347208	-0.0419599	-0.542949	0.282211	0.190379	0.15446	0.274962	-0.0247103	-0.134453	0.111451	-0.361401	0.402998	-1.00641	0.245936
-4.828	-0.289264	0.0008048	0.970406	0.571918	0.146336	-0.764726	-0.19175	0.320455	-0.347369	-0.0419219	-0.543033	0.281488	0.190572	0.154804	0.274922	-0.0245339	-0.134772	0.111761	-0.361172	0.402784	-1.00595	0.246401
-4.82752	-0.288896	0.0012413	0.970006	0.572959	0.147165	-0.764055	-0.191527	0.320516	-0.347456	-0.0407494	-0.543051	0.280776	0.19107	0.154691	0.275256	-0.0242401	-0.13483	0.112072	-0.361126	0.402331	-1.00579	0.246347
-4.82704	-0.289133	0.00104118	0.970411	0.571533	0.148573	-0.764359	-0.190729	0.320706	-0.34663	-0.0402119	-0.543202	0.280637	0.191813	0.154701	0.27432	-0.0242094	-0.135041	0.11259	-0.360855	0.402244	-1.00588	0.246499
-4.82656	-0.289711	0.000974199	0.97098	0.572082	0.149547	-0.764661	-0.189791	0.320714	-0.346904	-0.0397295	-0.54302	0.280059	0.192265	0.154359	0.273623	-0.0239595	-0.135397	0.113516	-0.360776	0.402183	-1.00605	0.246755
-4.82608	-0.289664	0.00113671	0.971393	0.572759	0.151059	-0.764166	-0.188468	0.320774	-0.346903	-0.0389449	-0.543383	0.279306	0.192428	0.154481	0.274005	-0.0238752	-0.135448	0.114348	-0.360472	0.402566	-1.00644	0.24707
-4.8256	-0.289499	0.00103564	0.972095	0.571958	0.151568	-0.764253	-0.187672	0.320939	-0.347113	-0.0380504	-0.543668	0.278499	0.192762	0.154537	0.274199	-0.0237257	-0.135706	0.115005	-0.360338	0.402949	-1.00638	0.247172
-4.82512	-0.289005	0.00111322	0.972372	0.572169	0.152779	-0.763702	-0.186782	0.320978	-0.346996	-0.0371016	-0.543763	0.277702	0.192969	0.15421	0.274417	-0.0238763	-0.135938	0.115325	-0.360328	0.402978	-1.0062	0.247358
-4.82464	-0.289106	0.00142707	0.972473	0.571476	0.15372	-0.76303	-0.185912	0.320879	-0.347375	-0.0363845	-0.543976	0.276773	0.193048	0.153855	0.274287	-0.0241074	-0.136252	0.115568	-0.360447	0.403032	-1.00608	0.247806
-4.82416	-0.288794	0.00157918	0.972689	0.570301	0.15415	-0.764157	-0.185418	0.321213	-0.348185	-0.0358321	-0.543813	0.275622	0.193333	0.154187	0.274496	-0.0236599	-0.136245	0.116091	-0.36037	0.403403	-1.00597	0.248396
-4.82368	-0.289717	0.00180921	0.972957	0.570717	0.155395	-0.764178	-0.18537	0.321375	-0.348294	-0.0350997	-0.54318	0.275304	0.193342	0.154075	0.274793	-0.0240349	-0.136215	0.116645	-0.360331	0.403777	-1.00551	0.248823
-4.8232	-0.289259	0.0011864	0.973248	0.569761	0.157001	-0.763974	-0.185133	0.321423	-0.34807	-0.0343774	-0.542523	0.274976	0.193599	0.154196	0.274676	-0.0241531	-0.136462	0.117047	-0.360301	0.403781	-1.00509	0.248822
-4.82272	-0.288744	0.00142045	0.974273	0.569387	0.157925	-0.76459	-0.184659	0.321684	-0.348722	-0.0338102	-0.542468	0.273979	0.1939	0.153966	0.27462	-0.0242296	-0.136722	0.117582	-0.360036	0.403708	-1.00471	0.249171
-4.82224	-0.288405	0.00117388	0.974909	0.569248	0.158707	-0.764376	-0.183989	0.321465	-0.349132	-0.0330141	-0.540996	0.273904	0.194165	0.153622	0.274158	-0.0240737	-0.137006	0.117989	-0.359595	0.404214	-1.00438	0.249611
-4.82176	-0.287977	0.00121925	0.975142	0.568865	0.159495	-0.765085	-0.183824	0.321416	-0.349945	-0.0323123	-0.540621	0.273704	0.194433	0.153313	0.274019	-0.0245437	-0.137303	0.118732	-0.359622	0.404467	-1.00419	0.249745
-4.82128	-0.287667	0.000872891	0.976267	0.568198	0.160246	-0.765321	-0.183588	0.321354	-0.350263	-0.0317682	-0.539865	0.272943	0.194886	0.152607	0.273869	-0.0242989	-0.137639	0.119051	-0.359377	0.404621	-1.00395	0.249701
-4.8208	-0.288525	0.000878359	0.977066	0.567014	0.160988	-0.765477	-0.182628	0.3214	-0.351385	-0.0307372	-0.539682	0.272672	0.194954	0.152584	0.273984	-0.0249541	-0.137901	0.119824	-0.359101	0.405227	-1.00387	0.249776
-4.82032	-0.28845	0.00074049	0.97764	0.566704	0.162074	-0.766365	-0.182136	0.321438	-0.35162	-0.0299214	-0.539368	0.271519	0.194792	0.152562	0.273497	-0.0242612	-0.138039	0.120613	-0.358919	0.40525	-1.00325	0.249953
-4.81984	-0.288893	0.000712066	0.978982	0.565732	0.16266	-0.767947	-0.181091	0.321453	-0.351754	-0.0292088	-0.539012	0.270496	0.194574	0.152502	0.274061	-0.0243135	-0.13837	0.121053	-0.35879	0.405737	-1.00318	0.250375
-4.81936	-0.289153	0.00056255	0.979357	0.565077	0.163265	-0.76954	-0.180156	0.321442	-0.35196	-0.0285659	-0.539165	0.269892	0.194846	0.15247	0.273871	-0.0247444	-0.138594	0.12143	-0.358666	0.405673	-1.00291	0.250919
-4.81888	-0.289051	0.000253492	0.979451	0.564393	0.164061	-0.770054	-0.179296	0.321685	-0.352691	-0.0280112	-0.53859	0.26899	0.194891	0.152457	0.273853	-0.0245701	-0.138617	0.121941	-0.35864	0.405704	-1.00229	0.251104
-4.8184	-0.289185	0.000406181	0.980012	0.563459	0.165371	-0.770455	-0.178864	0.322067	-0.353053	-0.0272393	-0.538184	0.267576	0.195435	0.152368	0.27384	-0.0244222	-0.138816	0.12234	-0.358841	0.405567	-1.00233	0.251403
-4.81792	-0.288621	0.000656668	0.980664	0.563877	0.166236	-0.770064	-0.177963	0.322319	-0.35301	-0.0268454	-0.537758	0.267429	0.195602	0.152068	0.27392	-0.0241377	-0.138829	0.122877	-0.358543	0.405992	-1.00156	0.251918
-4.81744	-0.288998	0.000157483	0.981659	0.564371	0.167165	-0.76998	-0.177724	0.322298	-0.353244	-0.0260122	-0.536661	0.267259	0.195866	0.152013	0.274003	-0.0242708	-0.138941	0.123717	-0.358247	0.40698	-1.0015	0.252058
-4.81696	-0.288043	0.000104145	0.982038	0.56402	0.168122	-0.770953	-0.17716	0.322211	-0.352326	-0.0259051	-0.536314	0.267344	0.196279	0.152026	0.273983	-0.0245297	-0.139037	0.123942	-0.357295	0.407106	-1.00132	0.252039
-4.81648	-0.28813	-6.91372e-05	0.98251	0.563864	0.16943	-0.771868	-0.176388	0.322171	-0.352212	-0.0256083	-0.534933	0.266652	0.196327	0.1521	0.274144	-0.0245715	-0.139561	0.124408	-0.356583	0.407747	-1.00071	0.252407
-4.816	-0.287858	-0.0007704	0.983233	0.563734	0.170707	-0.77272	-0.175394	0.322049	-0.352215	-0.0251412	-0.533096	0.266434	0.196408	0.151468	0.274633	-0.0246933	-0.139765	0.124757	-0.356327	0.407907	-1.00069	0.252611
-4.81552	-0.287925	-0.000849023	0.984008	0.563066	0.171515	-0.774609	-0.174089	0.321931	-0.351386	-0.0246599	-0.531974	0.266161	0.196157	0.15097	0.274639	-0.025346	-0.140091	0.124835	-0.356031	0.408236	-1.00077	0.252607
-4.81504	-0.287807	-0.000613457	0.984679	0.561942	0.173023	-0.775539	-0.173387	0.322223	-0.350673	-0.0244182	-0.531082	0.265642	0.196426	0.150587	0.274596	-0.0252977	-0.140285	0.125039	-0.355826	0.408771	-1.00057	0.252728
-4.81456	-0.28731	-0.000739106	0.985494	0.561906	0.173643	-0.777476	-0.172548	0.322284	-0.350012	-0.024443	-0.529786	0.265506	0.196319	0.150189	0.274632	-0.025334	-0.140692	0.125208	-0.355545	0.408937	-1.00011	0.252901
-4.81408	-0.28659	-0.0010355	0.985492	0.561242	0.175052	-0.777618	-0.171731	0.322232	-0.34949	-0.0242304	-0.527886	0.265964	0.196407	0.150179	0.275152	-0.02577	-0.141118	0.125111	-0.355059	0.409448	-1.00007	0.252909
-4.8136	-0.286565	-0.000764087	0.985807	0.561037	0.175555	-0.777719	-0.171031	0.32227	-0.348397	-0.0237622	-0.52659	0.265947	0.196606	0.150458	0.275307	-0.0261754	-0.141459	0.125361	-0.355397	0.409745	-0.999691	0.253442
-4.81312	-0.287362	-0.000397437	0.98658	0.560261	0.17642	-0.778064	-0.170141	0.322436	-0.347265	-0.0235041	-0.525882	0.26559	0.196768	0.150192	0.27523	-0.0264727	-0.141868	0.125928	-0.355304	0.410071	-0.99979	0.253539
-4.81264	-0.287055	0.000115555	0.986174	0.559026	0.177004	-0.778094	-0.169444	0.322461	-0.346376	-0.0227726	-0.525487	0.265909	0.196482	0.150023	0.275499	-0.0267126	-0.142179	0.126175	-0.355135	0.410573	-0.999859	0.253901
-4.81216	-0.287558	0.0010619	0.986571	0.558502	0.177641	-0.778177	-0.16919	0.322517	-0.345534	-0.0224441	-0.524233	0.265479	0.196574	0.150086	0.275825	-0.0268626	-0.142605	0.12683	-0.355022	0.411304	-0.999335	0.253862
-4.81168	-0.287111	0.000916878	0.987252	0.557661	0.178622	-0.779123	-0.168608	0.322705	-0.34407	-0.0225269	-0.523295	0.265682	0.196648	0.149456	0.27651	-0.026862	-0.143011	0.126642	-0.354727	0.411893	-0.999257	0.254278
-4.8112	-0.285944	0.00137555	0.986802	0.556533	0.179747	-0.779136	-0.168318	0.322824	-0.343522	-0.0223413	-0.520924	0.264861	0.196776	0.149663	0.276716	-0.0273406	-0.143426	0.126806	-0.354664	0.412359	-0.999597	0.254433
-4.81072	-0.285687	0.00149607	0.987753	0.554956	0.180618	-0.778195	-0.167444	0.322686	-0.343415	-0.0219997	-0.520488	0.264805	0.196583	0.149746	0.276887	-0.0279696	-0.143624	0.127061	-0.354675	0.412734	-0.99974	0.25465
-4.81024	-0.285129	0.00185087	0.988313	0.554225	0.181842	-0.777971	-0.166817	0.322575	-0.342918	-0.0219805	-0.518924	0.264888	0.19641	0.150266	0.277249	-0.0282585	-0.144105	0.12759	-0.354326	0.413076	-1.00015	0.254863
-4.80976	-0.284434	0.00202935	0.988754	0.553703	0.182685	-0.777107	-0.1665	0.322551	-0.342061	-0.0219281	-0.517229	0.264758	0.196339	0.150237	0.277148	-0.0282321	-0.144535	0.127826	-0.354342	0.413747	-0.999909	0.255125
-4.80928	-0.284085	0.00208596	0.988507	0.553305	0.183928	-0.776895	-0.165225	0.322423	-0.341395	-0.0221306	-0.516294	0.26467	0.196673	0.150602	0.276859	-0.0274696	-0.144828	0.128342	-0.354002	0.414261	-1.00048	0.255527
-4.8088	-0.284899	0.00216962	0.989689	0.552507	0.184721	-0.777627	-0.164085	0.322148	-0.340283	-0.0220721	-0.51485	0.264289	0.196597	0.150446	0.276734	-0.0272917	-0.145251	0.128442	-0.353645	0.415097	-1.00052	0.255873
-4.80832	-0.28525	0.00194198	0.989887	0.552132	0.185707	-0.778222	-0.163631	0.321996	-0.338972	-0.0220077	-0.512991	0.263686	0.196642	0.150725	0.277335	-0.0281557	-0.145516	0.128798	-0.353499	0.415343	-1.00087	0.255513
-4.80784	-0.285879	0.00158455	0.990681	0.551092	0.186499	-0.777729	-0.163124	0.321998	-0.336747	-0.0217062	-0.512006	0.262978	0.196853	0.150774	0.277278	-0.0277669	-0.145587	0.129346	-0.353341	0.415764	-1.00156	0.255678
-4.80736	-0.284674	0.00194708	0.990283	0.549808	0.187405	-0.778091	-0.162451	0.321987	-0.335069	-0.0206875	-0.510847	0.262048	0.196809	0.150723	0.27678	-0.0279595	-0.145972	0.129548	-0.352938	0.416104	-1.00176	0.256188
-4.80688	-0.284463	0.0018876	0.990455	0.549674	0.188311	-0.779517	-0.161938	0.321868	-0.334307	-0.0204896	-0.50998	0.26175	0.196746	0.150756	0.276607	-0.0282721	-0.145987	0.130021	-0.353024	0.416681	-1.00233	0.256589
-4.8064	-0.284498	0.00179652	0.990967	0.54849	0.189372	-0.780949	-0.160986	0.321717	-0.332942	-0.0203119	-0.509242	0.26158	0.196847	0.150407	0.276685	-0.0279452	-0.146328	0.130285	-0.353115	0.416834	-1.00255	0.256983
-4.80592	-0.284389	0.00157409	0.991865	0.547972	0.190354	-0.78183	-0.159898	0.32184	-0.332079	-0.0202802	-0.507645	0.261733	0.196746	0.150476	0.276538	-0.0272233	-0.146681	0.130548	-0.353011	0.41706	-1.00305	0.257105
-4.80544	-0.284211	0.00128569	0.99155	0.546941	0.191476	-0.783092	-0.160098	0.321795	-0.331018	-0.0204556	-0.50635	0.260921	0.19681	0.149987	0.276848	-0.0266038	-0.146893	0.130684	-0.352823	0.417174	-1.00303	0.257564
-4.80496	-0.28478	0.00106076	0.991522	0.54573	0.191853	-0.784342	-0.159817	0.321912	-0.329853	-0.0200015	-0.505106	0.260403	0.19683	0.149959	0.277057	-0.0266661	-0.147225	0.130897	-0.353024	0.417587	-1.003	0.258062
-4.80448	-0.284858	0.00126145	0.992092	0.544112	0.192955	-0.784659	-0.159106	0.321739	-0.328879	-0.0196571	-0.50428	0.259836	0.196726	0.149591	0.277268	-0.0266733	-0.14739	0.13063	-0.352809	0.417682	-1.00262	0.258514
-4.804	-0.285	0.00132566	0.992724	0.543775	0.193782	-0.784488	-0.15853	0.321576	-0.328199	-0.0198307	-0.503682	0.259149	0.196866	0.149519	0.277518	-0.0263909	-0.147902	0.131007	-0.352665	0.417982	-1.00253	0.258944
-4.80352	-0.285452	0.00151784	0.992913	0.541143	0.194987	-0.78548	-0.158974	0.321417	-0.327209	-0.0192382	-0.503483	0.258706	0.196786	0.149768	0.277575	-0.0262912	-0.148015	0.130674	-0.35251	0.41836	-1.00283	0.2595
-4.80304	-0.285819	0.00203016	0.992294	0.540254	0.196581	-0.786479	-0.1586	0.321256	-0.326011	-0.0190661	-0.50232	0.258326	0.197117	0.149858	0.277533	-0.0257848	-0.148388	0.130929	-0.352347	0.418882	-1.00241	0.259966
-4.80256	-0.286809	0.00201143	0.99259	0.539825	0.197953	-0.786125	-0.158263	0.320893	-0.32483	-0.0188815	-0.500345	0.258273	0.197287	0.150045	0.277299	-0.0253492	-0.148727	0.131241	-0.352127	0.419388	-1.00198	0.260254
-4.80208	-0.286525	0.00245683	0.99282	0.538534	0.198871	-0.787205	-0.158691	0.320719	-0.32331	-0.0181564	-0.498954	0.258358	0.197485	0.150488	0.277108	-0.0248525	-0.149133	0.131595	-0.351843	0.419621	-1.00207	0.260772
-4.8016	-0.286872	0.0033381	0.993156	0.53839	0.199642	-0.788018	-0.157809	0.320657	-0.322691	-0.0175887	-0.497901	0.258078	0.19748	0.150678	0.277262	-0.0242791	-0.14936	0.131808	-0.351942	0.419745	-1.0014	0.261304
-4.80112	-0.28734	0.00347286	0.992881	0.5374	0.200818	-0.788597	-0.158379	0.320489	-0.322701	-0.0170439	-0.49582	0.257869	0.19768	0.150529	0.277118	-0.0240326	-0.149505	0.131999	-0.352056	0.420307	-1.00148	0.261719
-4.80064	-0.287881	0.00419006	0.993367	0.534832	0.202097	-0.788834	-0.157631	0.320279	-0.321832	-0.0162999	-0.494675	0.2568	0.197821	0.150116	0.277708	-0.0241067	-0.149838	0.132343	-0.352064	0.42088	-1.00064	0.262127
-4.80016	-0.287628	0.00472199	0.993705	0.53499	0.202786	-0.790171	-0.157557	0.320448	-0.320506	-0.0156974	-0.493244	0.255932	0.197896	0.150657	0.277749	-0.0234622	-0.150339	0.132166	-0.351839	0.421047	-0.999883	0.262499
-4.79968	-0.28811	0.00502605	0.993944	0.534499	0.204001	-0.790713	-0.156333	0.32042	-0.319618	-0.0152275	-0.491597	0.25497	0.198247	0.150516	0.2782	-0.0230175	-0.150537	0.132282	-0.35163	0.421211	-0.99889	0.26264
-4.7992	-0.28806	0.00519157	0.994263	0.533471	0.204646	-0.792718	-0.156332	0.320447	-0.318649	-0.0148866	-0.49068	0.254369	0.198702	0.150424	0.278289	-0.0235553	-0.150604	0.132087	-0.35158	0.421587	-0.998425	0.262957
-4.79872	-0.288502	0.00509785	0.994372	0.53303	0.205711	-0.794104	-0.155739	0.320514	-0.317649	-0.0145827	-0.489664	0.253583	0.198991	0.150634	0.278863	-0.0237425	-0.150788	0.132083	-0.35135	0.422214	-0.998651	0.26313
-4.79824	-0.288244	0.00488842	0.994107	0.532443	0.206245	-0.794606	-0.155296	0.320471	-0.316776	-0.0141223	-0.488782	0.253051	0.198756	0.15073	0.279045	-0.023411	-0.150755	0.132034	-0.351419	0.422485	-0.998366	0.262968
-4.79776	-0.288033	0.00510069	0.993853	0.532127	0.206976	-0.796337	-0.155058	0.320425	-0.316517	-0.0137191	-0.488159	0.252785	0.198944	0.151194	0.279312	-0.023957	-0.150922	0.132216	-0.351123	0.422722	-0.998335	0.263065
-4.79728	-0.288141	0.00521874	0.994292	0.531892	0.208013	-0.797427	-0.154457	0.320108	-0.31587	-0.0132912	-0.487339	0.251938	0.199082	0.151639	0.279985	-0.0244276	-0.150694	0.132208	-0.350977	0.42333	-0.998266	0.263042
-4.7968	-0.287985	0.00603266	0.994681	0.530949	0.209268	-0.799703	-0.153615	0.319831	-0.315965	-0.0128601	-0.486755	0.251074	0.198932	0.151413	0.279768	-0.025068	-0.150964	0.132057	-0.350677	0.423841	-0.998355	0.263414
-4.79632	-0.288466	0.00560048	0.994685	0.529778	0.210191	-0.800198	-0.153876	0.319818	-0.31569	-0.0123952	-0.486249	0.250374	0.198777	0.151533	0.280454	-0.0255061	-0.151035	0.132362	-0.350436	0.423987	-0.997869	0.263636
-4.79584	-0.288847	0.00567239	0.994872	0.528898	0.211536	-0.802087	-0.153673	0.319569	-0.314677	-0.0122859	-0.484487	0.249719	0.198456	0.151666	0.281018	-0.0267154	-0.151143	0.132753	-0.350231	0.424467	-0.99723	0.263776
-4.79536	-0.288228	0.00593391	0.995711	0.528823	0.212683	-0.802808	-0.153314	0.319411	-0.314528	-0.012043	-0.483962	0.24936	0.198414	0.15188	0.280957	-0.0272464	-0.151516	0.133044	-0.349919	0.424892	-0.996293	0.264213
-4.79488	-0.288581	0.00550782	0.996329	0.528055	0.2143	-0.803541	-0.153368	0.319197	-0.312787	-0.0116912	-0.482932	0.248529	0.198548	0.151776	0.280767	-0.0280826	-0.151634	0.132998	-0.349313	0.42542	-0.995864	0.264579
-4.7944	-0.288788	0.00522151	0.996297	0.527321	0.215228	-0.803804	-0.152962	0.318902	-0.312197	-0.0114706	-0.48096	0.24821	0.19833	0.151917	0.280975	-0.0286823	-0.151821	0.133039	-0.349002	0.425751	-0.995152	0.264868
-4.79392	-0.288473	0.00447511	0.996351	0.527588	0.216757	-0.804956	-0.152811	0.318779	-0.311643	-0.0117492	-0.480483	0.247993	0.198003	0.151577	0.280813	-0.0290908	-0.152015	0.13289	-0.348815	0.426214	-0.994963	0.26515
-4.79344	-0.289041	0.00498699	0.996435	0.526199	0.217915	-0.804569	-0.15263	0.318549	-0.310634	-0.011457	-0.479618	0.247116	0.198001	0.151408	0.281445	-0.0296586	-0.152045	0.132692	-0.348485	0.42638	-0.994798	0.265316
-4.79296	-0.289469	0.00546545	0.996686	0.524874	0.218415	-0.804765	-0.152155	0.318537	-0.310037	-0.0111923	-0.479508	0.246662	0.197692	0.151598	0.281564	-0.0302292	-0.152351	0.133002	-0.348081	0.426976	-0.994706	0.265801
-4.79248	-0.289005	0.00529986	0.997312	0.524824	0.219574	-0.805244	-0.152092	0.318341	-0.308683	-0.0105369	-0.479398	0.246079	0.19774	0.15133	0.282118	-0.0316787	-0.15245	0.133238	-0.347823	0.427327	-0.994841	0.266253
-4.792	-0.288899	0.00583298	0.998195	0.524117	0.221051	-0.806084	-0.152476	0.31826	-0.307927	-0.00994034	-0.478336	0.245225	0.197428	0.151274	0.282792	-0.033136	-0.152826	0.13269	-0.34761	0.42702	-0.994384	0.266499
-4.79152	-0.289541	0.0065627	0.998002	0.523839	0.222573	-0.805645	-0.152908	0.318049	-0.307766	-0.00942325	-0.478836	0.244711	0.197086	0.15117	0.282655	-0.0332118	-0.152937	0.132631	-0.347107	0.427535	-0.994273	0.266543
-4.79104	-0.290009	0.00697853	0.998416	0.521954	0.222954	-0.805081	-0.152446	0.317882	-0.30716	-0.00919834	-0.478327	0.244076	0.196897	0.15093	0.282518	-0.0341243	-0.15306	0.132561	-0.347044	0.427901	-0.994625	0.266406
-4.79056	-0.290583	0.00732911	0.998419	0.521062	0.224482	-0.805039	-0.15228	0.317578	-0.306913	-0.0090431	-0.477789	0.243515	0.196675	0.150745	0.282791	-0.0350995	-0.153281	0.13247	-0.346998	0.428036	-0.99463	0.266457
-4.79008	-0.29115	0.00838227	0.998935	0.51992	0.22596	-0.805464	-0.152342	0.317453	-0.307289	-0.00855703	-0.477324	0.242622	0.196648	0.150562	0.282992	-0.0354615	-0.15372	0.131937	-0.346785	0.428684	-0.995231	0.266972
-4.7896	-0.291572	0.00875875	0.99937	0.518909	0.227165	-0.804758	-0.151846	0.317291	-0.306553	-0.00816357	-0.476457	0.242292	0.196749	0.150472	0.282639	-0.0365999	-0.153903	0.131633	-0.346452	0.428819	-0.994995	0.267399
-4.78912	-0.292052	0.00968143	0.999498	0.518029	0.22799	-0.80535	-0.152359	0.317062	-0.30561	-0.00817295	-0.476272	0.241706	0.196884	0.149974	0.282443	-0.037321	-0.154299	0.131699	-0.345754	0.42913	-0.99441	0.267476
-4.78864	-0.291776	0.0110533	1.00009	0.517061	0.228453	-0.805319	-0.152193	0.316721	-0.30487	-0.00806606	-0.475001	0.241148	0.196718	0.149826	0.282733	-0.037972	-0.154545	0.131789	-0.345467	0.429469	-0.994696	0.267872
-4.78816	-0.292475	0.0110714	1.00008	0.516245	0.229443	-0.805053	-0.152517	0.316561	-0.304587	-0.0080927	-0.474834	0.240267	0.19664	0.149678	0.282847	-0.0388638	-0.154731	0.132099	-0.345191	0.430096	-0.994512	0.268229
-4.78768	-0.29255	0.0110795	1.00071	0.514935	0.230265	-0.804564	-0.152294	0.316362	-0.304154	-0.00780355	-0.474938	0.239724	0.196665	0.149552	0.282804	-0.0394938	-0.154837	0.131893	-0.345015	0.430408	-0.99426	0.268617
-4.7872	-0.293523	0.0114861	1.00076	0.514798	0.2307	-0.805855	-0.151616	0.316545	-0.303649	-0.00772951	-0.475235	0.239066	0.196687	0.149553	0.282603	-0.0402799	-0.15541	0.131982	-0.344674	0.430918	-0.994062	0.268744
-4.78672	-0.293421	0.0115952	1.00032	0.513738	0.231742	-0.806437	-0.151426	0.316206	-0.302505	-0.00738909	-0.475105	0.237892	0.196637	0.149775	0.282543	-0.0405823	-0.155972	0.132086	-0.344626	0.431189	-0.993961	0.269217
-4.78624	-0.293987	0.0118958	1.00016	0.514583	0.232999	-0.80639	-0.150723	0.315976	-0.302018	-0.007094	-0.474504	0.237574	0.19656	0.150092	0.282665	-0.040752	-0.156346	0.131572	-0.344735	0.43213	-0.993796	0.269746
-4.78576	-0.295	0.0123169	1.00016	0.515232	0.234122	-0.806743	-0.150697	0.315911	-0.301302	-0.00726917	-0.474096	0.237186	0.196487	0.150096	0.282888	-0.0406	-0.156592	0.131163	-0.344628	0.432811	-0.993996	0.270061
-4.78528	-0.29456	0.0140881	1.00064	0.515414	0.235221	-0.806536	-0.15056	0.315751	-0.301089	-0.00703099	-0.472765	0.236751	0.196372	0.150202	0.28283	-0.0406791	-0.156826	0.130732	-0.344419	0.433557	-0.994451	0.27049
-4.7848	-0.294776	0.0144279	1.00072	0.51579	0.236402	-0.806419	-0.150081	0.315628	-0.300444	-0.00695822	-0.471517	0.235772	0.196435	0.150481	0.282651	-0.0405387	-0.157022	0.130765	-0.34438	0.434162	-0.99476	0.270689
-4.78432	-0.294467	0.0144285	1.00109	0.515927	0.237394	-0.806747	-0.149505	0.315513	-0.299867	-0.00696522	-0.471838	0.235063	0.196339	0.150828	0.282945	-0.040535	-0.157128	0.13059	-0.343918	0.434896	-0.994217	0.270766
-4.78384	-0.294802	0.0151107	1.00077	0.515716	0.237889	-0.807375	-0.149891	0.315319	-0.299605	-0.00748364	-0.470926	0.233997	0.196187	0.15114	0.282457	-0.0408924	-0.157464	0.130294	-0.34359	0.435456	-0.994115	0.270662
-4.78336	-0.294913	0.015112	1.00057	0.514969	0.238768	-0.809236	-0.148882	0.315322	-0.298877	-0.00715995	-0.469672	0.233226	0.196099	0.150693	0.28239	-0.0415852	-0.157617	0.130598	-0.343494	0.43609	-0.994046	0.270914
-4.78288	-0.294714	0.0153238	1.00065	0.51476	0.239429	-0.80886	-0.148198	0.315023	-0.298465	-0.00711996	-0.468141	0.232395	0.195788	0.150537	0.282698	-0.0423269	-0.157673	0.130694	-0.342915	0.436592	-0.99406	0.270895
-4.7824	-0.295525	0.0161733	1.001	0.514871	0.240598	-0.808854	-0.147568	0.315072	-0.298167	-0.00692586	-0.467276	0.232066	0.19533	0.150553	0.283004	-0.0430362	-0.157721	0.130347	-0.34247	0.437091	-0.994103	0.271005
-4.78192	-0.294396	0.0163857	1.0019	0.513664	0.24122	-0.807993	-0.146444	0.314962	-0.297552	-0.0070339	-0.46667	0.231627	0.195387	0.150496	0.28291	-0.0438486	-0.158009	0.130546	-0.342081	0.437654	-0.994603	0.271458
-4.78144	-0.293982	0.0166158	1.00252	0.514244	0.242093	-0.809883	-0.146088	0.315011	-0.29764	-0.00712005	-0.466692	0.231065	0.195186	0.150627	0.282702	-0.0439151	-0.157917	0.130838	-0.341678	0.438034	-0.994447	0.271542
-4.78096	-0.29418	0.0165508	1.00213	0.51458	0.242722	-0.811907	-0.146312	0.314977	-0.297232	-0.00680882	-0.466271	0.230551	0.195128	0.150437	0.282704	-0.0442091	-0.157959	0.130775	-0.341607	0.438656	-0.994171	0.271853
-4.78048	-0.294681	0.0167074	1.00295	0.514819	0.243237	-0.813232	-0.145912	0.314944	-0.296939	-0.00674483	-0.46534	0.230444	0.195056	0.150404	0.283134	-0.0445264	-0.158245	0.130849	-0.341314	0.439196	-0.993859	0.272004
-4.78	-0.294935	0.0171692	1.00308	0.515036	0.244151	-0.816095	-0.14556	0.314831	-0.296805	-0.00654596	-0.46414	0.230093	0.195246	0.150458	0.283386	-0.0445749	-0.158461	0.130875	-0.340998	0.438886	-0.994039	0.272404
-4.77952	-0.295444	0.0177241	1.00319	0.514091	0.244716	-0.817184	-0.144788	0.315007	-0.296654	-0.00691106	-0.464361	0.229918	0.195598	0.150561	0.283627	-0.0447993	-0.158769	0.130708	-0.340833	0.438854	-0.99462	0.272619
-4.77904	-0.295043	0.0180018	1.00335	0.514912	0.245394	-0.817602	-0.145058	0.31498	-0.296366	-0.00714776	-0.464067	0.229666	0.195222	0.150836	0.283376	-0.0446515	-0.159181	0.130905	-0.340487	0.439088	-0.995351	0.272696
-4.77856	-0.294787	0.018077	1.0044	0.513699	0.246729	-0.817884	-0.145526	0.314857	-0.297154	-0.00731476	-0.463542	0.229459	0.19494	0.151035	0.283642	-0.0451477	-0.159216	0.130841	-0.340179	0.439256	-0.995053	0.272599
-4.77808	-0.294746	0.0185933	1.00497	0.513643	0.247188	-0.817442	-0.145558	0.314847	-0.296956	-0.0073675	-0.463032	0.229363	0.194464	0.151014	0.283863	-0.045114	-0.159165	0.130939	-0.339937	0.439866	-0.995238	0.273045
-4.7776	-0.295039	0.0183926	1.00529	0.513179	0.247995	-0.817789	-0.145908	0.314666	-0.29616	-0.00797482	-0.462639	0.229069	0.194595	0.151063	0.283218	-0.0452939	-0.159316	0.131416	-0.339907	0.440083	-0.995745	0.273422
-4.77712	-0.295738	0.018656	1.00618	0.513067	0.248475	-0.818629	-0.145428	0.314768	-0.295674	-0.00840473	-0.461858	0.228716	0.194686	0.150592	0.283183	-0.0455666	-0.159492	0.131541	-0.339885	0.440662	-0.995747	0.273778
-4.77664	-0.294629	0.0186236	1.00634	0.512194	0.249331	-0.819665	-0.145714	0.314814	-0.295563	-0.00835465	-0.461091	0.228596	0.195023	0.150515	0.283	-0.045607	-0.159412	0.131507	-0.33966	0.440204	-0.996142	0.273807
-4.77616	-0.294181	0.0192168	1.00666	0.512084	0.250026	-0.82059	-0.145109	0.314909	-0.295496	-0.00829947	-0.460377	0.228229	0.195062	0.150406	0.283169	-0.0457804	-0.1598	0.132072	-0.33931	0.44093	-0.996684	0.273898
-4.77568	-0.293727	0.0195152	1.00727	0.512105	0.25091	-0.821717	-0.144567	0.314983	-0.295122	-0.00813562	-0.460036	0.228101	0.195178	0.15082	0.283152	-0.046039	-0.159726	0.132226	-0.339105	0.441119	-0.996804	0.274282
-4.7752	-0.293501	0.0197367	1.00767	0.512456	0.251303	-0.82239	-0.144129	0.314985	-0.294837	-0.00890742	-0.460414	0.227704	0.195001	0.151088	0.283382	-0.045971	-0.159957	0.13247	-0.338752	0.441166	-0.996873	0.274229
-4.77472	-0.293821	0.020106	1.00766	0.511934	0.252065	-0.823609	-0.144216	0.315145	-0.294891	-0.00872442	-0.459459	0.227833	0.194796	0.150831	0.283406	-0.0462112	-0.160166	0.13278	-0.338385	0.441602	-0.996938	0.274141
-4.77424	-0.293915	0.0202575	1.00853	0.512522	0.252677	-0.824182	-0.144712	0.315284	-0.29568	-0.00842501	-0.458932	0.227375	0.194999	0.150904	0.283793	-0.0465156	-0.160453	0.133151	-0.338373	0.442047	-0.997291	0.273828
-4.77376	-0.294288	0.0207631	1.00862	0.511917	0.253228	-0.825291	-0.144981	0.315136	-0.296202	-0.00875315	-0.459001	0.227088	0.195042	0.150926	0.28388	-0.0466069	-0.160689	0.133418	-0.337993	0.441869	-0.997844	0.274095
-4.77328	-0.294414	0.0208814	1.00898	0.511445	0.253408	-0.826128	-0.145354	0.315187	-0.296668	-0.00883213	-0.458424	0.22669	0.195219	0.150644	0.284351	-0.0472179	-0.160567	0.133616	-0.337873	0.44281	-0.997974	0.274366
-4.7728	-0.295312	0.0213549	1.00933	0.510838	0.253761	-0.827504	-0.145	0.314962	-0.297652	-0.00883965	-0.458118	0.226334	0.195142	0.150564	0.284409	-0.0478951	-0.160591	0.133183	-0.337797	0.443037	-0.998425	0.274347
-4.77232	-0.295175	0.0210185	1.00906	0.510835	0.25407	-0.828237	-0.145393	0.314837	-0.298727	-0.00855517	-0.457324	0.225233	0.195526	0.150617	0.28463	-0.0487531	-0.16069	0.133698	-0.337362	0.443132	-0.998117	0.274452
-4.77184	-0.294591	0.0210541	1.00906	0.51153	0.254249	-0.829634	-0.14509	0.314771	-0.29863	-0.008585	-0.456169	0.224837	0.195783	0.15069	0.284878	-0.0490112	-0.160714	0.134179	-0.336893	0.44345	-0.99867	0.274226
-4.77136	-0.294395	0.0208742	1.00898	0.511361	0.254291	-0.830169	-0.145891	0.314719	-0.297855	-0.00851269	-0.456069	0.224327	0.195862	0.150675	0.284606	-0.0497318	-0.161039	0.134474	-0.336775	0.443714	-0.998575	0.27468
-4.77088	-0.294293	0.0206529	1.00877	0.511911	0.255038	-0.830821	-0.146079	0.314741	-0.297243	-0.00823412	-0.455206	0.2242	0.196134	0.150818	0.28492	-0.0499491	-0.161449	0.134838	-0.336671	0.44389	-0.998671	0.275064
-4.7704	-0.293907	0.0210107	1.00886	0.511471	0.255831	-0.832583	-0.145644	0.314471	-0.296767	-0.00792301	-0.454886	0.223798	0.196195	0.150749	0.285433	-0.0501602	-0.16132	0.13507	-0.336566	0.443881	-0.998306	0.275059
-4.76992	-0.293595	0.0213444	1.0088	0.511733	0.256548	-0.833086	-0.14527	0.31431	-0.29616	-0.00757925	-0.454899	0.223874	0.19634	0.150674	0.285678	-0.049963	-0.161716	0.13507	-0.336649	0.443913	-0.998896	0.274794
-4.76944	-0.294171	0.0214804	1.00914	0.512551	0.25682	-0.832833	-0.145284	0.314382	-0.295996	-0.00737013	-0.454803	0.223546	0.196461	0.150295	0.285534	-0.0502587	-0.162012	0.135369	-0.336501	0.444072	-0.999304	0.27467
-4.76896	-0.294375	0.0214213	1.00942	0.513386	0.257536	-0.833953	-0.145271	0.31441	-0.295601	-0.00692541	-0.454474	0.223056	0.196357	0.150434	0.285691	-0.050171	-0.162342	0.13543	-0.336073	0.444089	-0.999622	0.275083
-4.76848	-0.295621	0.0217014	1.00935	0.513551	0.25859	-0.834073	-0.145479	0.31432	-0.29634	-0.00672848	-0.45349	0.222884	0.196446	0.15026	0.285831	-0.0505416	-0.162573	0.135189	-0.335838	0.444164	-0.99977	0.274724
-4.768	-0.294983	0.0214811	1.00935	0.51226	0.2588	-0.83471	-0.145766	0.314257	-0.296228	-0.00680652	-0.453731	0.223031	0.196462	0.149687	0.286126	-0.051283	-0.162949	0.13544	-0.335757	0.44441	-1.0001	0.274648
-4.76752	-0.29535	0.0224793	1.0092	0.513193	0.259129	-0.836439	-0.145934	0.314185	-0.295794	-0.00649382	-0.45368	0.223615	0.196447	0.149735	0.286015	-0.0518082	-0.162968	0.135375	-0.335696	0.444543	-1.00069	0.274819
-4.76704	-0.295714	0.0224489	1.00933	0.512947	0.259895	-0.83653	-0.145626	0.314285	-0.2965	-0.00623075	-0.45256	0.223353	0.19631	0.149887	0.286012	-0.0528041	-0.162945	0.1352	-0.33568	0.444819	-1.0004	0.275045
-4.76656	-0.29586	0.0225465	1.00997	0.512413	0.260244	-0.835433	-0.145404	0.314206	-0.296286	-0.00582971	-0.452711	0.223187	0.196354	0.150008	0.285438	-0.0532095	-0.163236	0.135354	-0.335224	0.445206	-1.00085	0.275008
-4.76608	-0.296133	0.0234383	1.0101	0.513207	0.260468	-0.835555	-0.145467	0.314193	-0.296148	-0.00594431	-0.453257	0.223254	0.196442	0.150587	0.285104	-0.0535942	-0.163548	0.135279	-0.335083	0.445239	-1.00148	0.275524
-4.7656	-0.296275	0.023607	1.00994	0.513303	0.2613	-0.835217	-0.145694	0.314073	-0.295954	-0.00612092	-0.452668	0.223047	0.196518	0.150589	0.284803	-0.0547838	-0.16378	0.135765	-0.334999	0.445374	-1.00259	0.275487
-4.76512	-0.296669	0.0235799	1.01016	0.51362	0.261524	-0.835871	-0.144916	0.314082	-0.295679	-0.00595896	-0.45171	0.22331	0.196597	0.150795	0.284338	-0.0541873	-0.16378	0.136137	-0.334809	0.445037	-1.00268	0.275262
-4.76464	-0.296227	0.0236062	1.01034	0.513304	0.26178	-0.836494	-0.144821	0.314245	-0.295039	-0.006104	-0.450679	0.222559	0.196973	0.150559	0.2841	-0.0545504	-0.163918	0.136163	-0.335039	0.445448	-1.00252	0.275171
-4.76416	-0.295967	0.0235634	1.01028	0.513425	0.262317	-0.835572	-0.144807	0.314365	-0.294288	-0.00601382	-0.449887	0.222227	0.196972	0.150549	0.283389	-0.0547828	-0.163835	0.136305	-0.334968	0.446166	-1.00226	0.275331
-4.76368	-0.295412	0.0238079	1.01067	0.513389	0.26245	-0.835306	-0.144588	0.314398	-0.293934	-0.00543167	-0.449445	0.221909	0.196869	0.150381	0.283246	-0.0549334	-0.163711	0.136388	-0.334866	0.446371	-1.00256	0.2752
-4.7632	-0.296074	0.0237722	1.01041	0.513253	0.263025	-0.835786	-0.145065	0.314424	-0.292883	-0.00549987	-0.449883	0.221805	0.196849	0.150359	0.283436	-0.0550978	-0.163433	0.136367	-0.334559	0.446824	-1.00258	0.275001
-4.76272	-0.295665	0.0241775	1.0111	0.512856	0.263588	-0.835898	-0.145318	0.314471	-0.292861	-0.00582325	-0.449484	0.221521	0.197289	0.150407	0.283581	-0.0552511	-0.163665	0.136447	-0.334316	0.446498	-1.00286	0.274868
-4.76224	-0.295978	0.0243415	1.01203	0.51301	0.263808	-0.83586	-0.145503	0.314498	-0.292185	-0.00530238	-0.448718	0.222202	0.197364	0.150539	0.283766	-0.0552001	-0.163875	0.136786	-0.334122	0.447092	-1.00306	0.274729
-4.76176	-0.296492	0.024313	1.01215	0.513224	0.263541	-0.836652	-0.145037	0.314684	-0.292315	-0.00516202	-0.44906	0.222147	0.197382	0.150561	0.283581	-0.0553091	-0.163808	0.136671	-0.334211	0.446895	-1.00319	0.275033
-4.76128	-0.296612	0.0250848	1.01203	0.513084	0.26363	-0.837958	-0.145204	0.314701	-0.292146	-0.00579995	-0.448591	0.222432	0.197203	0.150321	0.283779	-0.0558658	-0.163724	0.136789	-0.334236	0.446674	-1.00416	0.274986
-4.7608	-0.297153	0.025388	1.01192	0.512853	0.263957	-0.837307	-0.144833	0.314814	-0.292457	-0.00506183	-0.448131	0.221873	0.197361	0.150602	0.283405	-0.0560717	-0.164005	0.136447	-0.334282	0.446662	-1.00433	0.274861
-4.76032	-0.297673	0.0259264	1.01225	0.513018	0.264175	-0.838736	-0.144831	0.314728	-0.293039	-0.00505233	-0.449262	0.222084	0.197421	0.150706	0.282958	-0.0560768	-0.164026	0.136226	-0.334588	0.446973	-1.00549	0.274798
-4.75984	-0.298577	0.0255821	1.01246	0.51386	0.263743	-0.839494	-0.144431	0.314809	-0.292318	-0.00503438	-0.448578	0.221994	0.197695	0.150904	0.282749	-0.0557229	-0.163934	0.136112	-0.334686	0.447027	-1.00591	0.27469
-4.75936	-0.29925	0.0249408	1.01256	0.513891	0.263863	-0.840079	-0.143919	0.314778	-0.291836	-0.00574281	-0.44936	0.221838	0.197907	0.150876	0.283011	-0.0558818	-0.164234	0.136313	-0.334704	0.447276	-1.00618	0.274896
-4.75888	-0.299885	0.0246145	1.01342	0.514909	0.264054	-0.839468	-0.144667	0.314893	-0.291509	-0.00550234	-0.449544	0.221735	0.19787	0.150715	0.282743	-0.055772	-0.164043	0.13648	-0.334738	0.447614	-1.00676	0.274721
-4.7584	-0.300244	0.0246326	1.013	0.514839	0.264333	-0.8395	-0.145248	0.314758	-0.290201	-0.00544944	-0.451759	0.221614	0.19804	0.150978	0.282405	-0.0561873	-0.164088	0.136475	-0.334867	0.447722	-1.00698	0.274272
-4.75792	-0.300722	0.0246273	1.01317	0.514704	0.264398	-0.83925	-0.145185	0.314863	-0.290222	-0.00560693	-0.452872	0.221044	0.198277	0.151723	0.281821	-0.0566686	-0.163908	0.13674	-0.334917	0.447989	-1.00775	0.273955
-4.75744	-0.30023	0.0246374	1.01256	0.514839	0.264334	-0.83981	-0.144293	0.314929	-0.289308	-0.00514764	-0.453183	0.221289	0.198519	0.152004	0.281674	-0.0569719	-0.163917	0.136782	-0.335067	0.448402	-1.00816	0.273795
-4.75696	-0.300627	0.0244771	1.01228	0.516389	0.264829	-0.840487	-0.144682	0.315175	-0.288221	-0.00523894	-0.455161	0.221204	0.19877	0.152271	0.282023	-0.0573067	-0.163814	0.136803	-0.334762	0.448241	-1.0087	0.273627
-4.75648	-0.301608	0.0243085	1.01233	0.516251	0.264966	-0.840466	-0.144651	0.315375	-0.288253	-0.00485416	-0.454893	0.221376	0.198804	0.152723	0.281652	-0.057953	-0.163748	0.136931	-0.334946	0.448299	-1.00862	0.27362
-4.756	-0.302026	0.0246613	1.01158	0.517035	0.265838	-0.840954	-0.145006	0.315312	-0.288086	-0.00464311	-0.456325	0.221099	0.198908	0.153034	0.281629	-0.0589225	-0.163753	0.137131	-0.335409	0.448247	-1.00854	0.273629
-4.75552	-0.302051	0.0246823	1.01152	0.517146	0.266144	-0.841681	-0.144862	0.315239	-0.287777	-0.00433818	-0.456694	0.221238	0.199151	0.153388	0.281445	-0.0590047	-0.163555	0.137464	-0.335379	0.448238	-1.00853	0.273583
-4.75504	-0.302368	0.0247516	1.01181	0.517575	0.266593	-0.842114	-0.144828	0.315244	-0.28757	-0.00412609	-0.457426	0.220459	0.198786	0.154239	0.281278	-0.0594944	-0.163665	0.137656	-0.335372	0.448252	-1.00898	0.273226
-4.75456	-0.302488	0.0243091	1.0115	0.51769	0.266967	-0.843046	-0.144795	0.315438	-0.287068	-0.0040611	-0.457529	0.220371	0.199129	0.154372	0.281482	-0.0597834	-0.164042	0.137716	-0.335679	0.448254	-1.00914	0.273188
-4.75408	-0.302945	0.0238549	1.01171	0.518541	0.267228	-0.844295	-0.145117	0.315465	-0.286455	-0.00425509	-0.458091	0.220295	0.198779	0.155217	0.281307	-0.0603651	-0.164148	0.137816	-0.335838	0.448087	-1.00895	0.273612
-4.7536	-0.304467	0.0235689	1.01156	0.518069	0.267375	-0.843827	-0.145081	0.315566	-0.28606	-0.00444057	-0.459317	0.219847	0.198591	0.155427	0.281359	-0.0608683	-0.163978	0.137878	-0.335855	0.448061	-1.00901	0.273778
-4.75312	-0.305398	0.0233573	1.01111	0.518082	0.26744	-0.844716	-0.145051	0.315666	-0.285481	-0.00485276	-0.45916	0.219396	0.198121	0.156116	0.281647	-0.0610593	-0.164112	0.138171	-0.336025	0.447818	-1.00969	0.27345
-4.75264	-0.306557	0.0234735	1.01156	0.518181	0.267205	-0.844912	-0.145441	0.315872	-0.285061	-0.00485123	-0.459664	0.21882	0.198114	0.156411	0.281598	-0.0612479	-0.163957	0.138785	-0.336301	0.447951	-1.00971	0.273
-4.75216	-0.307246	0.0236111	1.01145	0.519758	0.267487	-0.844566	-0.145954	0.315926	-0.284569	-0.0047302	-0.461126	0.21862	0.197984	0.156747	0.282061	-0.0612394	-0.164009	0.13901	-0.336208	0.448081	-1.00988	0.272804
-4.75168	-0.307956	0.0231355	1.01088	0.519933	0.267794	-0.844079	-0.146555	0.316266	-0.284771	-0.00419718	-0.460872	0.218244	0.197709	0.157436	0.28216	-0.0612649	-0.163949	0.139243	-0.336148	0.447911	-1.01016	0.272554
-4.7512	-0.308468	0.0230866	1.01065	0.520494	0.268377	-0.844406	-0.146685	0.316341	-0.284328	-0.00387671	-0.461428	0.218346	0.197603	0.157886	0.282053	-0.0618136	-0.16381	0.13946	-0.336119	0.447399	-1.01002	0.272379
-4.75072	-0.308834	0.0233907	1.0111	0.520506	0.268871	-0.843546	-0.147143	0.316609	-0.283928	-0.00347028	-0.460904	0.218246	0.197687	0.158447	0.282133	-0.0620164	-0.164006	0.139812	-0.336133	0.447024	-1.00995	0.271882
-4.75024	-0.310193	0.0233248	1.01143	0.52051	0.269202	-0.843335	-0.146766	0.316691	-0.28356	-0.00311632	-0.4612	0.218481	0.197784	0.158982	0.282473	-0.0627584	-0.164031	0.139899	-0.335943	0.447082	-1.01013	0.271914
-4.74976	-0.311655	0.0233426	1.01164	0.520297	0.269699	-0.842296	-0.146763	0.316792	-0.282618	-0.00318308	-0.461412	0.218442	0.198106	0.159077	0.282322	-0.0632383	-0.16397	0.140371	-0.335846	0.447272	-1.01035	0.271403
-4.74928	-0.312696	0.0232732	1.01238	0.520017	0.269999	-0.843345	-0.146611	0.316724	-0.282234	-0.00279011	-0.4628	0.218047	0.19834	0.159598	0.282248	-0.0639054	-0.163846	0.140674	-0.335678	0.447507	-1.01062	0.271109
-4.7488	-0.313361	0.0231948	1.01238	0.521089	0.270472	-0.843478	-0.146693	0.316769	-0.281586	-0.00251294	-0.462912	0.217235	0.198625	0.16044	0.282061	-0.0638727	-0.163859	0.141144	-0.335681	0.447139	-1.01103	0.270591
-4.74832	-0.314648	0.0237201	1.01255	0.521161	0.271506	-0.842653	-0.146793	0.316885	-0.280812	-0.00238512	-0.463779	0.21733	0.198836	0.160649	0.281633	-0.0641594	-0.163748	0.141502	-0.335529	0.446927	-1.01111	0.270102
-4.74784	-0.316648	0.0240926	1.01243	0.522431	0.272647	-0.84194	-0.14674	0.317008	-0.280457	-0.00170617	-0.464008	0.216853	0.198822	0.161148	0.281793	-0.0643738	-0.163816	0.14178	-0.335548	0.446976	-1.01107	0.26972
-4.74736	-0.317231	0.0240923	1.012	0.522394	0.27281	-0.841991	-0.14705	0.317089	-0.278993	-0.00130012	-0.46446	0.216783	0.199203	0.161595	0.281794	-0.0640939	-0.163871	0.142136	-0.33534	0.446593	-1.01077	0.269474
-4.74688	-0.318985	0.0240763	1.01231	0.523253	0.272945	-0.840987	-0.147351	0.317163	-0.278738	-0.00126412	-0.464185	0.215946	0.199326	0.161796	0.281582	-0.0648441	-0.164042	0.142238	-0.335265	0.446081	-1.01065	0.269089
-4.7464	-0.318251	0.0247468	1.01268	0.525148	0.273575	-0.84095	-0.147683	0.31739	-0.277878	-0.000983465	-0.464233	0.215649	0.199244	0.162133	0.281531	-0.0649439	-0.16409	0.142692	-0.335314	0.445405	-1.01072	0.268835
-4.74592	-0.319219	0.0249868	1.01267	0.525256	0.274069	-0.840776	-0.147634	0.317491	-0.277404	-0.000917733	-0.464531	0.214978	0.199109	0.162461	0.281301	-0.0655373	-0.16407	0.143046	-0.335198	0.445446	-1.01067	0.269078
-4.74544	-0.321801	0.0257343	1.01332	0.525336	0.274491	-0.840821	-0.14734	0.31751	-0.276488	-0.000114493	-0.464532	0.214175	0.198808	0.162836	0.281281	-0.0655232	-0.163996	0.143442	-0.335215	0.445101	-1.01029	0.268982
-4.74496	-0.322071	0.0257306	1.01435	0.526579	0.275111	-0.840744	-0.147173	0.317542	-0.276135	0.000126196	-0.464139	0.213436	0.198595	0.162849	0.280843	-0.0656079	-0.164222	0.144213	-0.334968	0.444846	-1.01052	0.268598
-4.74448	-0.321462	0.0253319	1.01492	0.526739	0.275606	-0.839993	-0.147157	0.31764	-0.276022	0.000182625	-0.463602	0.213993	0.198863	0.16312	0.280735	-0.0654323	-0.1642	0.144303	-0.334962	0.444974	-1.0101	0.268351
-4.744	-0.321881	0.025602	1.01559	0.527433	0.275855	-0.839843	-0.147721	0.317803	-0.275049	0.00105735	-0.464197	0.213953	0.198988	0.163837	0.280507	-0.0655458	-0.164131	0.14454	-0.334845	0.444749	-1.00974	0.268082
-4.74352	-0.321949	0.0259133	1.01644	0.527459	0.276443	-0.839885	-0.147709	0.317882	-0.274234	0.00138618	-0.464268	0.214183	0.198924	0.164059	0.280308	-0.0657755	-0.16412	0.144621	-0.334987	0.444668	-1.00968	0.268249
-4.74304	-0.3232	0.0260762	1.01668	0.52834	0.276441	-0.839513	-0.147441	0.318002	-0.273635	0.00252376	-0.464887	0.214373	0.198594	0.164167	0.280266	-0.0661382	-0.164184	0.144535	-0.334963	0.444147	-1.0099	0.268267
-4.74256	-0.323937	0.0266319	1.01698	0.528528	0.276655	-0.839308	-0.147014	0.318138	-0.272635	0.00306985	-0.4654	0.214244	0.198432	0.16446	0.279749	-0.066492	-0.164371	0.144851	-0.334928	0.443947	-1.01008	0.267918
-4.74208	-0.323597	0.0269723	1.01772	0.528455	0.277188	-0.839586	-0.146829	0.318118	-0.271783	0.00340468	-0.465422	0.214101	0.19823	0.164851	0.279653	-0.0662308	-0.164577	0.145218	-0.335073	0.443718	-1.0105	0.267889
-4.7416	-0.324049	0.0275002	1.01764	0.52782	0.277566	-0.839937	-0.146415	0.318199	-0.27176	0.00359806	-0.464769	0.213669	0.197774	0.165091	0.279464	-0.0666595	-0.16479	0.145565	-0.335099	0.443216	-1.01062	0.267839
-4.74112	-0.323588	0.0279336	1.01868	0.528335	0.278185	-0.840678	-0.146015	0.318139	-0.270839	0.00397678	-0.46501	0.213028	0.19775	0.165428	0.279565	-0.0671315	-0.164797	0.146286	-0.335173	0.442588	-1.00997	0.26786
-4.74064	-0.324217	0.0282564	1.01951	0.528461	0.27868	-0.841263	-0.146437	0.318404	-0.269634	0.00429758	-0.465147	0.213027	0.197314	0.165484	0.280067	-0.0677718	-0.164568	0.14651	-0.335068	0.442586	-1.00984	0.267728
-4.74016	-0.324929	0.0290794	1.0196	0.52885	0.278568	-0.840568	-0.145876	0.318301	-0.268714	0.0045803	-0.464963	0.212544	0.196956	0.165147	0.280032	-0.0680782	-0.164302	0.146753	-0.334942	0.442194	-1.00911	0.267457
-4.73968	-0.325477	0.029111	1.02034	0.529255	0.279119	-0.840677	-0.145792	0.318447	-0.26783	0.00453313	-0.465181	0.211913	0.196791	0.165271	0.280072	-0.0678227	-0.164197	0.146764	-0.335019	0.442174	-1.00895	0.267463
-4.7392	-0.32612	0.0295924	1.02078	0.530202	0.279126	-0.841054	-0.14586	0.318712	-0.266466	0.00511207	-0.465567	0.211509	0.196489	0.165347	0.280341	-0.0682495	-0.164176	0.147174	-0.335204	0.44217	-1.00825	0.267498
-4.73872	-0.326892	0.0297927	1.02076	0.530784	0.279249	-0.840599	-0.146267	0.318824	-0.265355	0.00568922	-0.465584	0.211097	0.19648	0.165986	0.280116	-0.0682132	-0.163708	0.147151	-0.335289	0.441975	-1.00825	0.267371
-4.73824	-0.327055	0.0304938	1.02024	0.532194	0.279386	-0.841117	-0.146374	0.318935	-0.26355	0.00586466	-0.465336	0.211133	0.196685	0.166061	0.279788	-0.0683521	-0.163603	0.147584	-0.335087	0.441369	-1.00856	0.267115
-4.73776	-0.327471	0.0315086	1.02056	0.533623	0.279944	-0.841982	-0.146409	0.318997	-0.26291	0.00619803	-0.46537	0.211107	0.196409	0.165948	0.279632	-0.0681291	-0.16359	0.148249	-0.334887	0.441328	-1.00868	0.267127
-4.73728	-0.32787	0.0318679	1.02037	0.534016	0.280856	-0.843171	-0.146661	0.318945	-0.262522	0.00662543	-0.465287	0.211149	0.196022	0.166194	0.279345	-0.0686702	-0.163506	0.148343	-0.335149	0.441361	-1.00833	0.267293
-4.7368	-0.32855	0.0325986	1.02112	0.534697	0.280908	-0.84358	-0.146505	0.31918	-0.261378	0.00745553	-0.46475	0.210758	0.195447	0.166444	0.278966	-0.068834	-0.163452	0.148476	-0.335037	0.441156	-1.00814	0.267339
-4.73632	-0.329157	0.0330651	1.02158	0.533993	0.281317	-0.843857	-0.146151	0.319427	-0.261516	0.00788569	-0.464261	0.210745	0.19553	0.166407	0.277903	-0.0693221	-0.163503	0.148881	-0.334712	0.441085	-1.00797	0.267263
-4.73584	-0.329951	0.0337244	1.02222	0.534421	0.282173	-0.844716	-0.14557	0.319388	-0.260371	0.00795672	-0.464235	0.210144	0.194961	0.166598	0.277124	-0.0697175	-0.163677	0.149038	-0.334674	0.440647	-1.00738	0.267185
-4.73536	-0.33125	0.0344273	1.02292	0.534134	0.282627	-0.845116	-0.14511	0.319312	-0.260039	0.00846594	-0.463751	0.209808	0.194945	0.166723	0.276696	-0.0703114	-0.163785	0.149289	-0.334669	0.440213	-1.00736	0.26691
-4.73488	-0.332702	0.0351258	1.02318	0.533881	0.282742	-0.845089	-0.145395	0.319439	-0.25955	0.0085021	-0.462976	0.209776	0.194829	0.16684	0.27694	-0.0695989	-0.16391	0.149267	-0.334705	0.439622	-1.00725	0.266966
-4.7344	-0.33379	0.0354227	1.02347	0.533706	0.28365	-0.845091	-0.145508	0.319352	-0.258906	0.00866101	-0.46269	0.210169	0.194787	0.166473	0.276519	-0.0698188	-0.163809	0.149673	-0.3345	0.439743	-1.00667	0.266674
-4.73392	-0.334415	0.0361779	1.02429	0.534159	0.283388	-0.84612	-0.145156	0.319203	-0.257876	0.00935532	-0.461974	0.210195	0.19428	0.166072	0.275701	-0.0701397	-0.163948	0.149811	-0.334171	0.439649	-1.00613	0.266409
-4.73344	-0.335913	0.0363603	1.02422	0.534921	0.284441	-0.846509	-0.145656	0.319069	-0.257159	0.00979403	-0.461039	0.210272	0.19436	0.16601	0.274939	-0.0706024	-0.164377	0.150299	-0.334163	0.439473	-1.00616	0.266152
-4.73296	-0.336526	0.036082	1.02434	0.535427	0.284787	-0.847738	-0.145781	0.318898	-0.255437	0.0102655	-0.460185	0.209324	0.194319	0.166154	0.274515	-0.0710042	-0.164333	0.150364	-0.334202	0.439039	-1.00591	0.26626
-4.73248	-0.337287	0.0362386	1.02514	0.535003	0.284674	-0.847805	-0.145697	0.319006	-0.254644	0.0102044	-0.459519	0.209343	0.194219	0.166093	0.274503	-0.0709318	-0.164692	0.150692	-0.334048	0.43906	-1.00594	0.266622
-4.732	-0.33792	0.0363135	1.02581	0.536066	0.284646	-0.847412	-0.145905	0.319122	-0.254683	0.0106311	-0.458651	0.209422	0.193891	0.166102	0.27459	-0.0708375	-0.164714	0.150856	-0.333922	0.438713	-1.00476	0.266889
-4.73152	-0.339454	0.0365342	1.02675	0.535874	0.285051	-0.847558	-0.145768	0.31908	-0.254267	0.0114002	-0.457583	0.209134	0.193961	0.166247	0.27419	-0.0709481	-0.164567	0.15125	-0.333834	0.438932	-1.00403	0.267094
-4.73104	-0.339286	0.0364684	1.02701	0.535173	0.285474	-0.847866	-0.146024	0.31916	-0.253375	0.0122475	-0.457257	0.208502	0.193699	0.166264	0.27395	-0.0710548	-0.164359	0.151582	-0.333651	0.438445	-1.00429	0.267282
-4.73056	-0.339094	0.0364321	1.02762	0.53538	0.285722	-0.847046	-0.146147	0.319084	-0.253469	0.0126388	-0.456655	0.208958	0.193496	0.166391	0.274299	-0.0708762	-0.164365	0.151932	-0.3332	0.438433	-1.00395	0.267375
-4.73008	-0.340155	0.036437	1.0282	0.536239	0.285944	-0.84771	-0.14617	0.318934	-0.252938	0.0128726	-0.456679	0.209044	0.193165	0.166409	0.27463	-0.0715597	-0.164378	0.152528	-0.332827	0.438128	-1.00396	0.267613
-4.7296	-0.340595	0.0362143	1.02825	0.536527	0.286465	-0.846151	-0.146777	0.319322	-0.251878	0.0128835	-0.455979	0.209157	0.193217	0.16619	0.274151	-0.0714993	-0.16464	0.152643	-0.332749	0.438012	-1.00373	0.267735
-4.72912	-0.340512	0.0363512	1.02838	0.536868	0.287025	-0.845561	-0.147004	0.319385	-0.251601	0.0132364	-0.455379	0.209537	0.193206	0.165749	0.274645	-0.0714796	-0.16447	0.152612	-0.332536	0.438468	-1.00341	0.268299
-4.72864	-0.340665	0.0362119	1.02879	0.536282	0.288131	-0.846321	-0.147042	0.319499	-0.251373	0.0135432	-0.4545	0.209401	0.193074	0.165418	0.275194	-0.0716217	-0.164339	0.152996	-0.33212	0.438128	-1.00332	0.268072
-4.72816	-0.341615	0.0366537	1.02958	0.536196	0.28926	-0.846206	-0.14719	0.319435	-0.251239	0.0137991	-0.4532	0.208899	0.192957	0.165335	0.274541	-0.072115	-0.164349	0.153279	-0.332322	0.437818	-1.00271	0.268023
-4.72768	-0.341845	0.0366841	1.02995	0.535878	0.290273	-0.846686	-0.146747	0.319503	-0.251041	0.0141633	-0.451353	0.209117	0.192604	0.165561	0.27473	-0.0720416	-0.164399	0.153779	-0.33228	0.437937	-1.00215	0.267957
-4.7272	-0.342602	0.0366163	1.02987	0.535657	0.290959	-0.845903	-0.147737	0.319562	-0.250786	0.0147294	-0.45097	0.209017	0.192255	0.165378	0.274988	-0.072102	-0.164186	0.15416	-0.332117	0.437932	-1.00201	0.268358
-4.72672	-0.344048	0.0375345	1.02993	0.536994	0.291368	-0.846393	-0.148003	0.319272	-0.250438	0.0152892	-0.450428	0.208806	0.192143	0.165278	0.274892	-0.0719311	-0.164362	0.154992	-0.331738	0.437837	-1.00175	0.268924
-4.72624	-0.344796	0.0374908	1.03046	0.537377	0.292385	-0.845987	-0.148457	0.319339	-0.25103	0.0156457	-0.449683	0.208023	0.191958	0.164694	0.275333	-0.0719324	-0.164079	0.155359	-0.331181	0.437507	-1.00163	0.268864
-4.72576	-0.343894	0.0379615	1.03087	0.536564	0.292975	-0.846555	-0.148142	0.319358	-0.250344	0.0157072	-0.449367	0.208098	0.191952	0.164507	0.275368	-0.0725811	-0.16372	0.156236	-0.330703	0.437361	-1.00127	0.269251
-4.72528	-0.345369	0.0382981	1.03124	0.536419	0.293044	-0.84568	-0.148035	0.319317	-0.250621	0.0160451	-0.44894	0.207887	0.19204	0.164226	0.27568	-0.0722943	-0.163437	0.156666	-0.330615	0.43699	-1.00143	0.269263
-4.7248	-0.346013	0.0381193	1.03173	0.536025	0.293657	-0.845546	-0.148055	0.319052	-0.250484	0.0165226	-0.44798	0.207164	0.191667	0.16376	0.275641	-0.0723816	-0.163508	0.156659	-0.330091	0.437097	-1.0017	0.269283
-4.72432	-0.346811	0.0376616	1.03124	0.536564	0.293961	-0.844414	-0.147863	0.318757	-0.250496	0.0169124	-0.448201	0.207446	0.191836	0.163524	0.275367	-0.0723823	-0.163179	0.15697	-0.329511	0.436851	-1.00198	0.269303
-4.72384	-0.347366	0.0378781	1.03166	0.536433	0.294206	-0.844157	-0.147596	0.318773	-0.250468	0.0176326	-0.447814	0.207414	0.191695	0.163317	0.275521	-0.0727509	-0.162914	0.15729	-0.329093	0.43681	-1.00219	0.269574
-4.72336	-0.348512	0.037805	1.03222	0.536737	0.295096	-0.843935	-0.147869	0.318837	-0.250633	0.0178855	-0.447932	0.20715	0.191773	0.163198	0.275575	-0.0732543	-0.1626	0.157622	-0.328477	0.436464	-1.00212	0.269404
-4.72288	-0.350368	0.0376285	1.03194	0.536598	0.295742	-0.843732	-0.14816	0.318757	-0.249705	0.0181938	-0.447284	0.206759	0.191522	0.162644	0.275622	-0.0736101	-0.162246	0.157617	-0.328005	0.436409	-1.00236	0.269808
-4.7224	-0.352267	0.0373831	1.03216	0.536959	0.29635	-0.843536	-0.148543	0.318701	-0.250175	0.0180861	-0.4469	0.206738	0.191089	0.163169	0.275713	-0.0736086	-0.161975	0.157884	-0.327848	0.436555	-1.00301	0.269933
-4.72192	-0.353518	0.0371337	1.03204	0.536768	0.296771	-0.843796	-0.148881	0.318689	-0.249837	0.0188082	-0.446126	0.206971	0.191179	0.163192	0.275859	-0.0734479	-0.161703	0.158699	-0.327404	0.436925	-1.00309	0.269892
-4.72144	-0.353597	0.0376835	1.03167	0.537121	0.297638	-0.844916	-0.14948	0.318791	-0.248924	0.0187964	-0.445211	0.206563	0.191214	0.163584	0.27574	-0.0734851	-0.16148	0.158847	-0.327208	0.43681	-1.00271	0.269793
-4.72096	-0.354895	0.0383548	1.03168	0.537021	0.298223	-0.844585	-0.149543	0.318774	-0.248391	0.0186982	-0.444354	0.206373	0.191092	0.164217	0.275896	-0.0734589	-0.161247	0.158942	-0.326913	0.436564	-1.00286	0.269499
-4.72048	-0.355564	0.0388251	1.03197	0.537895	0.298958	-0.844941	-0.149871	0.318831	-0.248479	0.0196071	-0.443775	0.206261	0.190835	0.164685	0.275908	-0.0733303	-0.160953	0.159424	-0.326481	0.436344	-1.00278	0.269919
-4.72	-0.357407	0.0384234	1.03253	0.538469	0.299446	-0.846365	-0.150316	0.318904	-0.24852	0.0200486	-0.44315	0.206253	0.190544	0.165139	0.275462	-0.0733595	-0.160817	0.160034	-0.326439	0.436448	-1.00297	0.270094
-4.71952	-0.357764	0.0381116	1.03257	0.538867	0.299071	-0.846399	-0.150046	0.31881	-0.247847	0.0205437	-0.441765	0.206566	0.190446	0.165377	0.275394	-0.0732176	-0.160619	0.160229	-0.326155	0.43646	-1.00271	0.270062
-4.71904	-0.359226	0.0378046	1.03296	0.539866	0.299054	-0.846672	-0.150231	0.318823	-0.247464	0.0211905	-0.440952	0.20682	0.190697	0.165153	0.275795	-0.0730374	-0.160628	0.160484	-0.326089	0.436539	-1.00246	0.270119
-4.71856	-0.361538	0.0385895	1.03319	0.541892	0.299465	-0.848152	-0.150277	0.318928	-0.247572	0.021412	-0.439396	0.207032	0.190554	0.165772	0.275615	-0.0732325	-0.160329	0.160752	-0.325739	0.436462	-1.00169	0.270001
-4.71808	-0.36216	0.0383406	1.03299	0.542837	0.300005	-0.848398	-0.150686	0.31907	-0.24792	0.0217884	-0.437483	0.207051	0.190385	0.165629	0.276227	-0.0729652	-0.159931	0.161081	-0.325493	0.436295	-1.00189	0.27044
-4.7176	-0.363527	0.0391732	1.03308	0.543076	0.299846	-0.849076	-0.150807	0.318931	-0.247858	0.0217163	-0.436127	0.207131	0.190811	0.165796	0.275915	-0.0729757	-0.159647	0.161654	-0.325331	0.43642	-1.00155	0.270224
-4.71712	-0.364952	0.0388589	1.03352	0.543545	0.299866	-0.848956	-0.151043	0.318997	-0.247561	0.0217579	-0.435343	0.207104	0.190704	0.165865	0.276862	-0.073195	-0.159571	0.162194	-0.325237	0.436356	-1.00141	0.270681
-4.71664	-0.366916	0.0385535	1.03421	0.543224	0.300795	-0.849422	-0.151492	0.318976	-0.247562	0.0218695	-0.434452	0.207277	0.190743	0.166573	0.27657	-0.0729297	-0.159289	0.162745	-0.325126	0.436298	-1.00105	0.270553
-4.71616	-0.368047	0.038542	1.03454	0.544128	0.301228	-0.849929	-0.151841	0.318968	-0.247769	0.0219227	-0.433592	0.207643	0.191091	0.166933	0.276144	-0.0723086	-0.159206	0.163294	-0.325181	0.436262	-1.00102	0.270513
-4.71568	-0.368939	0.0377788	1.03605	0.544506	0.301539	-0.84885	-0.151711	0.318819	-0.248327	0.0221645	-0.43302	0.207244	0.191225	0.167347	0.276016	-0.072347	-0.159075	0.163949	-0.325383	0.436601	-1.00102	0.270487
-4.7152	-0.370061	0.0382018	1.03664	0.545576	0.302256	-0.848813	-0.152647	0.318825	-0.248246	0.0222281	-0.43166	0.207023	0.191564	0.167004	0.275351	-0.072363	-0.159	0.164338	-0.325382	0.436413	-1.00137	0.270589
-4.71472	-0.370142	0.0381709	1.03728	0.546553	0.302315	-0.847976	-0.15286	0.3188	-0.248611	0.0223603	-0.430439	0.207001	0.19162	0.167337	0.275415	-0.0724287	-0.158854	0.164722	-0.325206	0.436314	-1.00107	0.271122
-4.71424	-0.371213	0.0383597	1.03755	0.547058	0.302948	-0.847572	-0.153287	0.318839	-0.248536	0.0225899	-0.42923	0.206659	0.191737	0.167508	0.275327	-0.0731253	-0.158661	0.165189	-0.325225	0.43627	-1.00095	0.271417
-4.71376	-0.371794	0.0382955	1.0378	0.547934	0.303309	-0.847562	-0.152904	0.318802	-0.24826	0.0226969	-0.428651	0.206336	0.191807	0.167385	0.275484	-0.0730895	-0.158371	0.16559	-0.325115	0.436911	-1.0012	0.271374
-4.71328	-0.371964	0.038673	1.03817	0.547935	0.303296	-0.847176	-0.153207	0.31864	-0.24845	0.0221032	-0.428266	0.206402	0.191697	0.167388	0.27507	-0.0733805	-0.15803	0.166232	-0.324845	0.436988	-1.00185	0.271553
-4.7128	-0.372364	0.0389267	1.03831	0.548236	0.30353	-0.845913	-0.153309	0.318781	-0.247612	0.0223011	-0.427495	0.205821	0.191969	0.167181	0.274764	-0.0733323	-0.157976	0.166517	-0.324672	0.437506	-1.00165	0.271435
-4.71232	-0.373038	0.0391361	1.03892	0.547937	0.304236	-0.844853	-0.153726	0.318845	-0.247229	0.022561	-0.426468	0.205241	0.191722	0.166894	0.274526	-0.0721292	-0.157961	0.167048	-0.324545	0.437365	-1.00185	0.271477
-4.71184	-0.373754	0.038359	1.03934	0.547504	0.304665	-0.844434	-0.154196	0.318975	-0.24749	0.0226163	-0.425492	0.204997	0.191756	0.167159	0.274417	-0.0712121	-0.157973	0.167209	-0.324535	0.437548	-1.00194	0.271087
-4.71136	-0.373291	0.0381736	1.0398	0.547312	0.304787	-0.843612	-0.154466	0.318984	-0.247443	0.022546	-0.424808	0.205398	0.191442	0.166403	0.274701	-0.0717591	-0.15799	0.167568	-0.324286	0.437973	-1.00175	0.271074
-4.71088	-0.373731	0.0383031	1.04012	0.546925	0.304978	-0.843227	-0.155012	0.319003	-0.247095	0.0227486	-0.422719	0.205777	0.191326	0.166269	0.274511	-0.0716104	-0.157951	0.168796	-0.324537	0.438101	-1.00194	0.27131
-4.7104	-0.374617	0.0383881	1.04126	0.546841	0.304877	-0.843006	-0.155231	0.31904	-0.247068	0.0228985	-0.421755	0.20566	0.190908	0.166389	0.274446	-0.0720351	-0.157868	0.168942	-0.324457	0.438018	-1.00179	0.271436
-4.70992	-0.374631	0.038178	1.04181	0.547318	0.305106	-0.842996	-0.155555	0.319114	-0.246879	0.0229003	-0.420295	0.20599	0.190856	0.166339	0.274089	-0.0721237	-0.157527	0.169492	-0.324495	0.438143	-1.00192	0.271665
-4.70944	-0.374597	0.0388683	1.04182	0.547816	0.305267	-0.841667	-0.156179	0.319067	-0.246193	0.0232092	-0.418777	0.2057	0.190943	0.166202	0.273846	-0.0722287	-0.157594	0.170132	-0.32452	0.438381	-1.0019	0.271904
-4.70896	-0.374875	0.0391174	1.04266	0.547821	0.305345	-0.841365	-0.157127	0.319095	-0.245715	0.0236438	-0.418281	0.205585	0.190979	0.16614	0.273348	-0.0723521	-0.157485	0.170136	-0.324373	0.438793	-1.00196	0.271813
-4.70848	-0.375714	0.0386973	1.04347	0.548539	0.305774	-0.840445	-0.157709	0.319052	-0.245172	0.0242638	-0.416733	0.205238	0.191157	0.166383	0.273139	-0.0727834	-0.157536	0.170342	-0.323925	0.43922	-1.00202	0.271729
-4.708	-0.376104	0.0390019	1.04381	0.548394	0.306226	-0.839337	-0.158013	0.31901	-0.245002	0.0243586	-0.414734	0.204826	0.191406	0.166152	0.272941	-0.0733287	-0.157257	0.170615	-0.323709	0.439799	-1.00209	0.271748
-4.70752	-0.376191	0.0390255	1.04411	0.548184	0.306796	-0.840199	-0.158644	0.318691	-0.244903	0.0246099	-0.414748	0.204059	0.191874	0.166253	0.272984	-0.073481	-0.157411	0.171415	-0.323372	0.440499	-1.00222	0.271516
-4.70704	-0.376556	0.0387399	1.04381	0.549082	0.307204	-0.839535	-0.159157	0.318574	-0.244448	0.0249061	-0.415539	0.203838	0.192071	0.166074	0.272896	-0.0741313	-0.157492	0.172306	-0.323204	0.440607	-1.00224	0.271974
-4.70656	-0.377022	0.0387965	1.04378	0.548357	0.307366	-0.839799	-0.15926	0.318464	-0.244313	0.02508	-0.41678	0.203731	0.191807	0.166333	0.273136	-0.0743068	-0.157558	0.172575	-0.323005	0.441083	-1.00165	0.272137
-4.70608	-0.377005	0.0386944	1.04431	0.546982	0.307478	-0.83993	-0.159629	0.318508	-0.243021	0.0251881	-0.41662	0.203514	0.191929	0.166852	0.272753	-0.0750562	-0.157408	0.172916	-0.322898	0.441505	-1.00125	0.272113
-4.7056	-0.376918	0.0389181	1.04487	0.546821	0.307735	-0.838256	-0.160248	0.318468	-0.241996	0.0253044	-0.415763	0.20318	0.192288	0.167091	0.272768	-0.0753786	-0.157154	0.173445	-0.322684	0.441178	-1.00153	0.271913
-4.70512	-0.377094	0.0388651	1.04557	0.546832	0.308242	-0.837739	-0.160555	0.318663	-0.242208	0.0258576	-0.415777	0.203045	0.192059	0.167	0.272831	-0.0756954	-0.157145	0.173784	-0.322958	0.441894	-1.00184	0.271962
-4.70464	-0.377901	0.0387239	1.04607	0.546215	0.308488	-0.838256	-0.160874	0.318831	-0.241793	0.0259997	-0.417059	0.203016	0.192155	0.167197	0.273406	-0.0754566	-0.157217	0.17446	-0.32287	0.442057	-1.0021	0.272105
-4.70416	-0.378244	0.0385949	1.04661	0.54554	0.308879	-0.839214	-0.16124	0.31906	-0.240835	0.0267288	-0.416986	0.202825	0.192063	0.167266	0.273115	-0.0751797	-0.157083	0.175106	-0.323052	0.442336	-1.0026	0.272132
-4.70368	-0.377333	0.0382103	1.0471	0.544813	0.309085	-0.838168	-0.16143	0.319101	-0.240444	0.026848	-0.417163	0.202714	0.191985	0.166999	0.272806	-0.0752112	-0.157072	0.175531	-0.323177	0.442531	-1.00279	0.272096
-4.7032	-0.377938	0.0385724	1.0468	0.544761	0.308837	-0.837842	-0.161522	0.319174	-0.240264	0.0273282	-0.418079	0.20233	0.191582	0.167148	0.272845	-0.0752403	-0.15695	0.176197	-0.323293	0.443069	-1.00309	0.271511
-4.70272	-0.377984	0.0386261	1.04717	0.543903	0.309006	-0.836907	-0.161271	0.319235	-0.239774	0.0276068	-0.418112	0.201989	0.191691	0.166891	0.272673	-0.0757419	-0.156813	0.176899	-0.323048	0.443407	-1.00357	0.271488
-4.70224	-0.378295	0.0388747	1.04658	0.543376	0.30935	-0.83463	-0.160895	0.31923	-0.239215	0.0281384	-0.417728	0.201723	0.191556	0.166866	0.272203	-0.0759644	-0.156992	0.177141	-0.323003	0.443798	-1.00329	0.271811
-4.70176	-0.378983	0.0386842	1.04662	0.543753	0.308973	-0.833761	-0.160336	0.319524	-0.239373	0.0283098	-0.417791	0.201594	0.191196	0.166621	0.271706	-0.0755709	-0.156776	0.177402	-0.322787	0.443996	-1.00305	0.271632
-4.70128	-0.379508	0.0385805	1.04742	0.544068	0.308742	-0.834756	-0.159881	0.319623	-0.239385	0.0286405	-0.418377	0.201881	0.191002	0.166715	0.271421	-0.0754653	-0.15665	0.177737	-0.322953	0.44351	-1.00304	0.271315
-4.7008	-0.379978	0.0385165	1.04706	0.543274	0.309067	-0.83521	-0.159827	0.319484	-0.239469	0.0291045	-0.418441	0.202282	0.190481	0.166589	0.271795	-0.0752819	-0.156407	0.178072	-0.322889	0.443672	-1.00294	0.271414
-4.70032	-0.380249	0.0385251	1.04748	0.541853	0.309152	-0.835042	-0.159343	0.319461	-0.239649	0.0295496	-0.418483	0.202182	0.190529	0.166132	0.271371	-0.0750036	-0.156284	0.178553	-0.322908	0.444164	-1.00306	0.271482
-4.69984	-0.3806	0.0385724	1.04741	0.541724	0.309505	-0.835936	-0.158993	0.319656	-0.240228	0.030285	-0.418061	0.201946	0.190214	0.165903	0.271165	-0.0749315	-0.156243	0.178576	-0.323043	0.444685	-1.00332	0.27138
-4.69936	-0.380722	0.0389881	1.04791	0.541802	0.309875	-0.836413	-0.158873	0.319681	-0.240227	0.0311736	-0.41877	0.201981	0.190259	0.165756	0.27156	-0.0751949	-0.156141	0.178941	-0.322969	0.445089	-1.00379	0.271766
-4.69888	-0.382034	0.039549	1.04829	0.541503	0.309814	-0.836121	-0.158923	0.319778	-0.239981	0.0315665	-0.417965	0.201356	0.190077	0.166092	0.271508	-0.0746907	-0.156335	0.179926	-0.323128	0.444831	-1.00352	0.27194
-4.6984	-0.382701	0.0398526	1.04852	0.542029	0.30974	-0.835616	-0.15868	0.319981	-0.239804	0.0318722	-0.416864	0.201943	0.189858	0.165824	0.270972	-0.0744855	-0.156333	0.179971	-0.323186	0.444612	-1.00413	0.272349
-4.69792	-0.383177	0.0396592	1.04911	0.540863	0.310211	-0.835481	-0.158412	0.320092	-0.240411	0.0326412	-0.415117	0.202069	0.189478	0.166238	0.270913	-0.0744891	-0.156163	0.179904	-0.323114	0.445063	-1.00351	0.272402
-4.69744	-0.383818	0.0400027	1.04991	0.540518	0.310597	-0.835898	-0.158426	0.320169	-0.240615	0.0326937	-0.414132	0.201907	0.189374	0.166134	0.270979	-0.0747777	-0.1564	0.180491	-0.323065	0.445174	-1.00265	0.272511
-4.69696	-0.383723	0.0397598	1.0503	0.539832	0.311096	-0.835627	-0.158557	0.320374	-0.240681	0.0336285	-0.412964	0.201605	0.188912	0.166354	0.270757	-0.0750401	-0.156346	0.180797	-0.322907	0.444677	-1.00226	0.272479
-4.69648	-0.384521	0.0401474	1.05061	0.539284	0.311274	-0.83526	-0.158188	0.320625	-0.240577	0.0339059	-0.411783	0.202062	0.188788	0.166439	0.270642	-0.0748866	-0.156268	0.181223	-0.322877	0.444889	-1.00217	0.272632
-4.696	-0.384828	0.0400735	1.05045	0.537289	0.311599	-0.835103	-0.158555	0.320841	-0.24025	0.033822	-0.411309	0.201999	0.188684	0.166325	0.270374	-0.0748568	-0.156145	0.181841	-0.322995	0.445225	-1.00196	0.272371
-4.69552	-0.384654	0.0401312	1.05011	0.536884	0.311822	-0.83482	-0.1589	0.320795	-0.239684	0.0342718	-0.410625	0.202135	0.188541	0.166358	0.270091	-0.075554	-0.15607	0.182528	-0.323191	0.445402	-1.00165	0.272193
-4.69504	-0.385272	0.0387184	1.04955	0.536538	0.312344	-0.835035	-0.15922	0.321026	-0.238912	0.0346613	-0.410273	0.202112	0.188508	0.166329	0.2699	-0.0753136	-0.155909	0.182378	-0.323089	0.445152	-1.0019	0.272566
-4.69456	-0.385864	0.0386586	1.0503	0.53611	0.312747	-0.835662	-0.159513	0.32099	-0.238459	0.0346513	-0.410295	0.201379	0.18838	0.167026	0.269437	-0.0748175	-0.155882	0.182576	-0.322955	0.445542	-1.00174	0.272475
-4.69408	-0.385472	0.0383001	1.05088	0.53555	0.313144	-0.835626	-0.1597	0.321013	-0.238158	0.0351513	-0.409468	0.200848	0.188015	0.167382	0.269017	-0.0748028	-0.155933	0.182875	-0.322731	0.445637	-1.00189	0.272636
-4.6936	-0.386336	0.0385666	1.05093	0.535166	0.31342	-0.836341	-0.160009	0.321257	-0.237961	0.0354644	-0.408678	0.200432	0.187799	0.167903	0.269112	-0.074979	-0.15583	0.182966	-0.322958	0.445898	-1.00168	0.273234
-4.69312	-0.387495	0.0383884	1.05125	0.534733	0.313812	-0.835518	-0.160175	0.321422	-0.237497	0.0356901	-0.407886	0.200466	0.187328	0.168032	0.269397	-0.0749368	-0.155595	0.182883	-0.322781	0.445829	-1.0018	0.273107
-4.69264	-0.387974	0.0381251	1.05151	0.535163	0.313801	-0.835666	-0.16027	0.321486	-0.236598	0.0358138	-0.407105	0.200494	0.186984	0.167903	0.26966	-0.0746303	-0.155548	0.183001	-0.323036	0.446018	-1.00168	0.273127
-4.69216	-0.388556	0.0380382	1.05198	0.532861	0.313751	-0.834399	-0.160478	0.32167	-0.237421	0.0360313	-0.406248	0.200651	0.186763	0.168159	0.269447	-0.0748668	-0.155585	0.183437	-0.323112	0.446073	-1.00187	0.273163
-4.69168	-0.389472	0.0382904	1.05214	0.532609	0.313588	-0.835535	-0.159991	0.321923	-0.237006	0.036829	-0.405467	0.201199	0.186247	0.168012	0.268973	-0.0745049	-0.155691	0.184062	-0.323257	0.446302	-1.00245	0.272881
-4.6912	-0.390264	0.0379967	1.05293	0.532694	0.314503	-0.837483	-0.160324	0.322089	-0.237084	0.0365705	-0.405324	0.201509	0.185644	0.16845	0.269087	-0.0748105	-0.155559	0.184564	-0.323343	0.446527	-1.00231	0.272928
-4.69072	-0.391201	0.0380591	1.05331	0.532277	0.314934	-0.837315	-0.16003	0.322295	-0.236687	0.0370113	-0.405284	0.201949	0.185199	0.169041	0.268494	-0.0750537	-0.155532	0.185107	-0.323419	0.446205	-1.00238	0.273274
-4.69024	-0.390732	0.0380328	1.05288	0.531232	0.315789	-0.836749	-0.160385	0.322602	-0.236769	0.0370038	-0.404633	0.201873	0.185081	0.169468	0.267706	-0.0742813	-0.155642	0.185424	-0.32337	0.445935	-1.00241	0.27357
-4.68976	-0.390702	0.0380087	1.05386	0.530669	0.316263	-0.836543	-0.159794	0.322954	-0.236024	0.0371062	-0.404539	0.201308	0.184893	0.169566	0.267725	-0.0745773	-0.155572	0.185812	-0.323497	0.445957	-1.00252	0.273544
-4.68928	-0.390266	0.0376627	1.0545	0.530376	0.317601	-0.836071	-0.15928	0.322913	-0.236028	0.0372183	-0.403926	0.201217	0.184672	0.169984	0.268054	-0.0744794	-0.155392	0.185838	-0.323617	0.446314	-1.00307	0.273143
-4.6888	-0.390512	0.0380035	1.05488	0.530567	0.318165	-0.837802	-0.159114	0.322838	-0.236031	0.0376237	-0.401389	0.201305	0.18457	0.170683	0.267694	-0.0749775	-0.1554	0.186447	-0.323819	0.446343	-1.00396	0.273599
-4.68832	-0.390987	0.0384261	1.05495	0.531433	0.319534	-0.838203	-0.159378	0.322943	-0.236209	0.0380694	-0.401523	0.201479	0.184295	0.171131	0.267694	-0.0755353	-0.155408	0.186597	-0.323933	0.446598	-1.00501	0.274035
-4.68784	-0.391224	0.038811	1.05505	0.531927	0.319784	-0.838408	-0.159499	0.323017	-0.23636	0.0385239	-0.401448	0.200916	0.184001	0.171661	0.267099	-0.0754422	-0.155224	0.186561	-0.324025	0.446511	-1.0056	0.274421
-4.68736	-0.391504	0.0393893	1.05513	0.531718	0.320167	-0.837456	-0.159194	0.323199	-0.236087	0.0391402	-0.400698	0.200498	0.183872	0.171816	0.267488	-0.0756204	-0.154936	0.186802	-0.324149	0.446815	-1.00632	0.273693
-4.68688	-0.392031	0.0395149	1.05576	0.531593	0.320408	-0.837694	-0.158964	0.323361	-0.236215	0.0392529	-0.399533	0.200688	0.183516	0.171839	0.267577	-0.0755304	-0.154632	0.186868	-0.323973	0.446726	-1.00697	0.273848
-4.6864	-0.392205	0.0395859	1.05602	0.532733	0.32079	-0.838204	-0.159277	0.323467	-0.235818	0.0396987	-0.398492	0.20065	0.183321	0.171755	0.267236	-0.0769708	-0.154668	0.187065	-0.324004	0.446565	-1.00763	0.274171
-4.68592	-0.392334	0.0400335	1.0559	0.532685	0.320958	-0.839069	-0.159091	0.323395	-0.235479	0.0398928	-0.397164	0.200501	0.18305	0.171792	0.267302	-0.0777143	-0.154739	0.187084	-0.324152	0.446596	-1.00851	0.274648
-4.68544	-0.392171	0.040509	1.05605	0.533038	0.321978	-0.839891	-0.158713	0.323544	-0.234738	0.0406626	-0.395867	0.200412	0.183048	0.172628	0.26699	-0.0789579	-0.154843	0.187345	-0.324359	0.446636	-1.00936	0.274247
-4.68496	-0.393226	0.0403078	1.05594	0.53311	0.322219	-0.840037	-0.158945	0.32348	-0.234101	0.0409305	-0.395724	0.200535	0.182611	0.172815	0.266298	-0.0786773	-0.155058	0.187695	-0.324444	0.446652	-1.00936	0.27481
-4.68448	-0.393661	0.0407765	1.05621	0.532771	0.323063	-0.840908	-0.158608	0.3235	-0.233857	0.041662	-0.395613	0.19983	0.182126	0.173304	0.266106	-0.0783764	-0.154776	0.188528	-0.32442	0.447005	-1.00982	0.274937
-4.684	-0.394256	0.0409528	1.05625	0.532885	0.323513	-0.840548	-0.15848	0.323655	-0.232898	0.042107	-0.395655	0.199707	0.181629	0.173655	0.266231	-0.0784361	-0.154707	0.188954	-0.324346	0.446921	-1.01044	0.274728
-4.68352	-0.394049	0.0415609	1.0567	0.531955	0.323641	-0.841467	-0.158802	0.323815	-0.232353	0.0424109	-0.395197	0.199658	0.181242	0.1743	0.266007	-0.0790142	-0.154812	0.188844	-0.32452	0.447169	-1.0113	0.275343
-4.68304	-0.39486	0.0418005	1.0573	0.531572	0.324235	-0.841962	-0.15908	0.323784	-0.231738	0.0427664	-0.394152	0.199351	0.18102	0.174985	0.266063	-0.0791249	-0.154823	0.18929	-0.324643	0.447172	-1.01181	0.275645
-4.68256	-0.395088	0.0421394	1.05741	0.531963	0.32415	-0.841415	-0.159571	0.324012	-0.231323	0.0429424	-0.39308	0.198963	0.180743	0.175376	0.26605	-0.0795531	-0.154656	0.189371	-0.324593	0.447676	-1.01196	0.275941
-4.68208	-0.395315	0.0423768	1.05728	0.530663	0.324556	-0.84076	-0.160337	0.323926	-0.230859	0.0431753	-0.392256	0.198806	0.180257	0.175609	0.266426	-0.0806741	-0.154502	0.189738	-0.324773	0.447493	-1.01256	0.276106
-4.6816	-0.395796	0.0421807	1.05695	0.529975	0.324989	-0.841428	-0.160569	0.324012	-0.229811	0.0434765	-0.391587	0.199105	0.179698	0.175509	0.266295	-0.0820728	-0.15419	0.19028	-0.324562	0.447507	-1.01305	0.276064
-4.68112	-0.396054	0.0423381	1.05701	0.530053	0.32605	-0.841212	-0.160536	0.32404	-0.229279	0.0435044	-0.391362	0.198414	0.179272	0.175802	0.267151	-0.0831769	-0.153906	0.190726	-0.324704	0.447482	-1.01341	0.276709
-4.68064	-0.397313	0.042611	1.05771	0.529351	0.325573	-0.841526	-0.16049	0.32412	-0.229574	0.0440109	-0.391274	0.197828	0.179039	0.176126	0.267058	-0.0837086	-0.153781	0.190796	-0.324754	0.447375	-1.01416	0.27672
-4.68016	-0.398326	0.0427308	1.05826	0.529149	0.325783	-0.840631	-0.160104	0.324019	-0.229209	0.0442328	-0.390398	0.197061	0.178821	0.176534	0.266983	-0.0841891	-0.153528	0.191261	-0.324711	0.447463	-1.0139	0.277102
-4.67968	-0.399957	0.0423352	1.05773	0.529388	0.32618	-0.839863	-0.160492	0.324061	-0.229285	0.0441456	-0.390821	0.196515	0.178676	0.176537	0.266474	-0.084804	-0.153394	0.191671	-0.324836	0.447345	-1.01377	0.276888
-4.6792	-0.400471	0.0417015	1.05717	0.5289	0.326743	-0.840283	-0.160948	0.323993	-0.229701	0.0444682	-0.391019	0.195931	0.178946	0.176835	0.265931	-0.0855817	-0.153225	0.191512	-0.32463	0.446907	-1.01336	0.276735
-4.67872	-0.400959	0.0412807	1.05653	0.529765	0.327403	-0.84073	-0.160434	0.323817	-0.229904	0.0454951	-0.390974	0.194913	0.178622	0.177038	0.265847	-0.0858926	-0.153424	0.191605	-0.324574	0.446912	-1.01311	0.276902
-4.67824	-0.403349	0.04156	1.0565	0.527984	0.327533	-0.841802	-0.160293	0.323856	-0.23001	0.0456109	-0.390516	0.194751	0.178431	0.177341	0.265688	-0.0862564	-0.153302	0.192025	-0.324481	0.447181	-1.01282	0.277378
-4.67776	-0.403407	0.0418576	1.05571	0.528071	0.32705	-0.841991	-0.159837	0.323999	-0.229451	0.0465181	-0.390032	0.194777	0.178155	0.177651	0.265351	-0.0861407	-0.153405	0.192052	-0.324446	0.447226	-1.01234	0.277519
-4.67728	-0.40429	0.0418631	1.05571	0.52811	0.327523	-0.84217	-0.160274	0.324333	-0.228937	0.0470155	-0.389701	0.193824	0.177809	0.177417	0.265888	-0.0873897	-0.153565	0.192317	-0.324272	0.447164	-1.01205	0.277765
-4.6768	-0.405183	0.0412679	1.05556	0.526486	0.327908	-0.841945	-0.160058	0.324388	-0.227992	0.0474809	-0.389087	0.193286	0.177463	0.177676	0.265225	-0.087249	-0.153769	0.192409	-0.32441	0.44701	-1.01175	0.277909
-4.67632	-0.406358	0.0412884	1.05497	0.525804	0.328197	-0.841863	-0.159974	0.324384	-0.227967	0.0477891	-0.388356	0.192495	0.177441	0.177682	0.265346	-0.0889991	-0.153991	0.192716	-0.32438	0.446993	-1.01156	0.278044
-4.67584	-0.406995	0.0407602	1.05559	0.525517	0.328384	-0.842322	-0.16012	0.324426	-0.22709	0.0477329	-0.387933	0.192419	0.177024	0.177831	0.265642	-0.0889374	-0.154294	0.192773	-0.324368	0.447351	-1.01147	0.278038
-4.67536	-0.407518	0.0410239	1.05573	0.5251	0.329032	-0.843636	-0.160155	0.324759	-0.226644	0.0479192	-0.386936	0.191901	0.176591	0.177972	0.265394	-0.0899403	-0.154621	0.192768	-0.324579	0.447542	-1.01121	0.278135
-4.67488	-0.40872	0.0408563	1.0555	0.523184	0.329848	-0.844155	-0.160795	0.324981	-0.225414	0.0481781	-0.386283	0.19143	0.176211	0.177982	0.265277	-0.0923929	-0.154947	0.192891	-0.324282	0.447451	-1.01126	0.278298
-4.6744	-0.409693	0.0406146	1.0558	0.522337	0.330152	-0.845204	-0.160791	0.325114	-0.225169	0.0482277	-0.385598	0.191318	0.175877	0.177819	0.265505	-0.0976864	-0.155022	0.19305	-0.324286	0.447465	-1.01119	0.278248
-4.67392	-0.411176	0.0405844	1.05535	0.522515	0.330037	-0.845527	-0.161161	0.325264	-0.22442	0.0481098	-0.384074	0.191003	0.175761	0.178126	0.264794	-0.103015	-0.155072	0.193354	-0.324483	0.44751	-1.01096	0.278486
-4.67344	-0.411999	0.040404	1.05594	0.521637	0.330991	-0.846361	-0.161563	0.325433	-0.223956	0.0481653	-0.384205	0.190761	0.175101	0.178204	0.26494	-0.106319	-0.155457	0.193736	-0.324512	0.447572	-1.0108	0.278746
-4.67296	-0.41368	0.0408122	1.0557	0.520385	0.330946	-0.845691	-0.161605	0.325653	-0.224194	0.0488837	-0.38272	0.190519	0.175077	0.178135	0.265343	-0.107641	-0.155717	0.193957	-0.324681	0.447683	-1.01078	0.278604
-4.67248	-0.414501	0.0410426	1.05482	0.518851	0.331503	-0.84556	-0.161673	0.325733	-0.223924	0.0489663	-0.381231	0.190281	0.174819	0.178757	0.266027	-0.109246	-0.15586	0.194263	-0.324744	0.447862	-1.01055	0.278322
-4.672	-0.41583	0.0411312	1.05446	0.518511	0.331279	-0.846026	-0.161859	0.325754	-0.22405	0.0489208	-0.380685	0.189941	0.174962	0.178771	0.266113	-0.112211	-0.155994	0.194352	-0.324805	0.448131	-1.01025	0.27832
-4.67152	-0.417521	0.0412464	1.0547	0.517844	0.332021	-0.846075	-0.161606	0.325882	-0.223462	0.0495259	-0.380042	0.18981	0.174786	0.178662	0.266536	-0.116964	-0.155702	0.19479	-0.324754	0.448151	-1.0097	0.27854
-4.67104	-0.417927	0.0409974	1.05368	0.514952	0.332767	-0.84614	-0.161787	0.325881	-0.223441	0.0500845	-0.377924	0.188385	0.174468	0.178876	0.26671	-0.121694	-0.155857	0.194611	-0.324921	0.448161	-1.00949	0.278592
-4.67056	-0.418849	0.0411648	1.05336	0.514452	0.333347	-0.846712	-0.161988	0.326108	-0.223284	0.0511316	-0.377213	0.188171	0.174291	0.179119	0.266303	-0.137264	-0.156205	0.194586	-0.325017	0.448118	-1.00915	0.278733
-4.67008	-0.419851	0.0414827	1.05323	0.513962	0.333819	-0.845671	-0.161915	0.326368	-0.223509	0.0512949	-0.377129	0.187852	0.174101	0.179078	0.266733	-0.140321	-0.156361	0.195085	-0.324855	0.448196	-1.00916	0.278512
-4.6696	-0.42023	0.0407652	1.05346	0.51356	0.334185	-0.845423	-0.161765	0.326655	-0.223917	0.0531696	-0.376977	0.188394	0.173915	0.178983	0.266756	-0.143802	-0.156443	0.195277	-0.325112	0.448518	-1.00911	0.278538
-4.66912	-0.420365	0.0406928	1.0541	0.512272	0.334477	-0.846198	-0.161851	0.326758	-0.224293	0.0532975	-0.375681	0.188518	0.173818	0.178899	0.266886	-0.150369	-0.156355	0.195715	-0.325287	0.448717	-1.00932	0.278574
-4.66864	-0.421959	0.0402809	1.05384	0.512125	0.334183	-0.846546	-0.161293	0.326858	-0.224027	0.0537534	-0.375373	0.18838	0.173707	0.178921	0.266743	-0.150266	-0.156637	0.195956	-0.325327	0.448613	-1.00889	0.278758
-4.66816	-0.422678	0.0398462	1.05414	0.511494	0.334197	-0.847341	-0.161118	0.327022	-0.223926	0.0546826	-0.374874	0.188466	0.17339	0.178671	0.2668	-0.150147	-0.156563	0.19625	-0.325436	0.448425	-1.00879	0.278674
-4.66768	-0.422875	0.0394039	1.0537	0.510133	0.334324	-0.846562	-0.161306	0.327326	-0.224001	0.0551747	-0.374117	0.188558	0.172965	0.178338	0.267672	-0.150167	-0.15652	0.196438	-0.325439	0.44849	-1.0086	0.278635
-4.6672	-0.425001	0.038639	1.05441	0.51025	0.334246	-0.846245	-0.161307	0.32745	-0.224024	0.055727	-0.373866	0.188391	0.172755	0.178305	0.268194	-0.149801	-0.156818	0.196774	-0.325655	0.448813	-1.00857	0.279107
-4.66672	-0.426669	0.0379356	1.05366	0.509709	0.334469	-0.847554	-0.161252	0.327858	-0.223644	0.056835	-0.373351	0.187437	0.172533	0.178098	0.268675	-0.149306	-0.157216	0.196995	-0.325545	0.449348	-1.00819	0.279004
-4.66624	-0.428305	0.038039	1.05331	0.509545	0.334884	-0.847828	-0.161046	0.32795	-0.223628	0.0575309	-0.37337	0.188116	0.172164	0.177724	0.268952	-0.149488	-0.157543	0.19726	-0.325608	0.449451	-1.00817	0.279464
-4.66576	-0.428651	0.0379235	1.05356	0.50932	0.335528	-0.848395	-0.160847	0.328106	-0.22237	0.0584647	-0.373296	0.188059	0.172056	0.177495	0.269136	-0.149788	-0.1577	0.196983	-0.325791	0.449653	-1.00773	0.279704
-4.66528	-0.429809	0.0374924	1.05408	0.507984	0.335849	-0.849338	-0.160143	0.328404	-0.221895	0.0591475	-0.373476	0.188062	0.17168	0.177299	0.269195	-0.149853	-0.15785	0.197334	-0.325946	0.44971	-1.00735	0.279565
-4.6648	-0.430663	0.0378266	1.05428	0.50832	0.336063	-0.850754	-0.159791	0.328437	-0.221345	0.0598036	-0.373496	0.188234	0.171381	0.177387	0.269687	-0.150198	-0.157667	0.197566	-0.326065	0.449668	-1.0074	0.279879
-4.66432	-0.431549	0.0377623	1.05405	0.508744	0.336033	-0.850545	-0.160055	0.328688	-0.221112	0.0608026	-0.373284	0.188141	0.171344	0.177479	0.270374	-0.150726	-0.15772	0.198012	-0.326268	0.449526	-1.00752	0.28007
-4.66384	-0.431968	0.0374828	1.05448	0.50862	0.336406	-0.851661	-0.160218	0.329038	-0.220996	0.061816	-0.37308	0.188061	0.171247	0.177339	0.270337	-0.150998	-0.157563	0.198001	-0.326581	0.449332	-1.00735	0.280218
-4.66336	-0.432988	0.0374051	1.0543	0.508234	0.337131	-0.85157	-0.160019	0.329158	-0.220809	0.0628931	-0.373916	0.188644	0.171131	0.177014	0.270493	-0.151444	-0.157341	0.198029	-0.326478	0.449486	-1.00721	0.280383
-4.66288	-0.434277	0.0372665	1.05464	0.508099	0.336945	-0.8513	-0.159901	0.329252	-0.219957	0.0640713	-0.373247	0.188962	0.171107	0.176679	0.27034	-0.15202	-0.15712	0.197958	-0.326444	0.449387	-1.0073	0.280291
-4.6624	-0.43527	0.0375557	1.05482	0.507832	0.33702	-0.850775	-0.159474	0.329333	-0.219339	0.0648525	-0.373088	0.18921	0.171017	0.17633	0.2711	-0.152371	-0.156982	0.198099	-0.326514	0.449466	-1.00722	0.28076
-4.66192	-0.436916	0.0378518	1.05483	0.506133	0.337444	-0.851576	-0.159291	0.329524	-0.217677	0.0652029	-0.372568	0.189839	0.170829	0.175926	0.27118	-0.152466	-0.157007	0.198088	-0.326459	0.449599	-1.00769	0.280756
-4.66144	-0.437755	0.038121	1.05513	0.50552	0.337771	-0.851082	-0.158861	0.329595	-0.216992	0.0659076	-0.372691	0.190285	0.170833	0.175376	0.271465	-0.152322	-0.156938	0.198013	-0.326816	0.449885	-1.00789	0.280857
-4.66096	-0.43763	0.0378355	1.05484	0.505084	0.338226	-0.85044	-0.158775	0.329826	-0.215679	0.066751	-0.372852	0.190827	0.170548	0.17528	0.271572	-0.152579	-0.156995	0.197982	-0.326754	0.449536	-1.00798	0.280606
-4.66048	-0.438388	0.0373466	1.05532	0.504351	0.338771	-0.850736	-0.158808	0.330113	-0.214415	0.066979	-0.372722	0.191119	0.170398	0.175092	0.271398	-0.153767	-0.157047	0.197739	-0.32682	0.449951	-1.00793	0.280546
-4.66	-0.438601	0.0377159	1.05462	0.504361	0.339536	-0.850479	-0.159255	0.330153	-0.213524	0.0680002	-0.371664	0.190703	0.169991	0.175078	0.271702	-0.15493	-0.156968	0.197776	-0.326754	0.450135	-1.00807	0.280928
-4.65952	-0.439245	0.0369253	1.05511	0.504612	0.340075	-0.850824	-0.158743	0.330216	-0.212791	0.0685906	-0.371197	0.190977	0.170014	0.175076	0.272921	-0.155324	-0.156885	0.198208	-0.326703	0.450268	-1.00823	0.280976
-4.65904	-0.440854	0.0369117	1.0546	0.50457	0.340684	-0.852047	-0.158726	0.330318	-0.212073	0.0691017	-0.371328	0.191396	0.169976	0.174963	0.273313	-0.156011	-0.156671	0.198312	-0.326554	0.45075	-1.00835	0.281181
-4.65856	-0.441548	0.0371289	1.05495	0.503886	0.341178	-0.852648	-0.158392	0.330424	-0.211543	0.0698369	-0.371646	0.192039	0.169725	0.174749	0.273711	-0.157137	-0.156503	0.198568	-0.326646	0.450618	-1.00857	0.281495
-4.65808	-0.442009	0.0370065	1.05484	0.502335	0.341428	-0.85246	-0.158511	0.330531	-0.211575	0.0701461	-0.373308	0.192239	0.169633	0.174715	0.273688	-0.15771	-0.156474	0.198823	-0.326754	0.45056	-1.00884	0.28158
-4.6576	-0.443642	0.0368312	1.05512	0.501418	0.341952	-0.852639	-0.158441	0.330521	-0.212209	0.0706276	-0.374363	0.192346	0.169588	0.1742	0.274508	-0.158677	-0.156249	0.199323	-0.326832	0.450702	-1.00913	0.281805
-4.65712	-0.445306	0.0367134	1.05488	0.501034	0.3425	-0.853002	-0.158148	0.330513	-0.211096	0.0717425	-0.374464	0.192836	0.169479	0.174293	0.274882	-0.159139	-0.156158	0.200047	-0.326864	0.450748	-1.00894	0.282285
-4.65664	-0.445878	0.0367867	1.05473	0.500363	0.343233	-0.85202	-0.158001	0.330833	-0.211042	0.0724705	-0.376068	0.192731	0.169483	0.174062	0.275404	-0.160233	-0.156154	0.200489	-0.326825	0.450547	-1.00912	0.282592
-4.65616	-0.446687	0.0374208	1.05436	0.500238	0.34362	-0.850126	-0.157678	0.330958	-0.210931	0.0727823	-0.375724	0.192244	0.169175	0.174454	0.275606	-0.160744	-0.156234	0.200873	-0.326748	0.450544	-1.00934	0.282952
-4.65568	-0.448354	0.0379578	1.05425	0.499963	0.344432	-0.849424	-0.157209	0.330941	-0.209754	0.072864	-0.376365	0.193316	0.169322	0.174432	0.275973	-0.161925	-0.156425	0.201141	-0.326932	0.450318	-1.00949	0.283046
-4.6552	-0.448805	0.0379504	1.05344	0.499397	0.345076	-0.849613	-0.156704	0.330994	-0.208883	0.0733053	-0.376287	0.193977	0.169328	0.174222	0.275628	-0.162086	-0.156422	0.201387	-0.326947	0.450245	-1.00972	0.28315
-4.65472	-0.449878	0.0384677	1.05332	0.498814	0.34539	-0.849332	-0.156329	0.33136	-0.208948	0.0740267	-0.376268	0.194492	0.16925	0.173783	0.275864	-0.162974	-0.157079	0.201678	-0.326958	0.450596	-1.01001	0.2832
-4.65424	-0.45198	0.0392476	1.05268	0.497568	0.345496	-0.849488	-0.155896	0.331595	-0.208202	0.0747404	-0.376738	0.195088	0.169268	0.173682	0.276152	-0.163151	-0.157155	0.201793	-0.327341	0.450968	-1.01033	0.283407
-4.65376	-0.453115	0.0393643	1.05164	0.497238	0.346291	-0.848232	-0.155821	0.331633	-0.208161	0.0758822	-0.376364	0.195137	0.169573	0.173592	0.276602	-0.163846	-0.157234	0.202171	-0.327475	0.450976	-1.01022	0.28363
-4.65328	-0.453475	0.0398181	1.05117	0.49564	0.3473	-0.84814	-0.155471	0.331621	-0.207632	0.0766922	-0.376574	0.195779	0.169029	0.173588	0.276919	-0.164318	-0.157105	0.202265	-0.327759	0.450928	-1.01041	0.283654
-4.6528	-0.45404	0.0400999	1.05131	0.495525	0.348115	-0.847544	-0.155433	0.331884	-0.207798	0.0771216	-0.376224	0.195497	0.168662	0.173339	0.276305	-0.164626	-0.156937	0.202614	-0.328121	0.450898	-1.01033	0.283653
-4.65232	-0.455105	0.03949	1.05038	0.494701	0.348835	-0.846885	-0.15489	0.332242	-0.208725	0.0778139	-0.375655	0.195956	0.168442	0.173426	0.276238	-0.164857	-0.157084	0.202699	-0.328146	0.450825	-1.01061	0.283751
-4.65184	-0.456236	0.0397892	1.04971	0.494042	0.349126	-0.847513	-0.154899	0.332333	-0.208347	0.0783509	-0.37561	0.19678	0.168267	0.173386	0.276323	-0.165199	-0.157427	0.202972	-0.328283	0.45094	-1.01024	0.284039
-4.65136	-0.457217	0.0395669	1.04849	0.494166	0.350202	-0.848392	-0.154636	0.332432	-0.207409	0.0791195	-0.374542	0.197035	0.168056	0.173278	0.27596	-0.166314	-0.157498	0.203167	-0.328615	0.450941	-1.00998	0.283918
-4.65088	-0.458039	0.0399178	1.04796	0.49305	0.350778	-0.848258	-0.154361	0.33253	-0.206735	0.0795729	-0.374275	0.197806	0.167848	0.173059	0.275628	-0.167117	-0.157546	0.202981	-0.329113	0.450935	-1.01023	0.283971
-4.6504	-0.45872	0.0400761	1.04703	0.492112	0.351535	-0.848917	-0.153441	0.332546	-0.206795	0.0802652	-0.373249	0.197599	0.167334	0.172554	0.275663	-0.167513	-0.157585	0.203026	-0.329367	0.450879	-1.01028	0.28392
-4.64992	-0.459243	0.0399994	1.04649	0.492027	0.352314	-0.85077	-0.153348	0.332774	-0.205578	0.0805984	-0.371403	0.197481	0.167333	0.173095	0.275232	-0.168075	-0.157619	0.20311	-0.329653	0.451043	-1.01056	0.283967
-4.64944	-0.459744	0.0392592	1.04641	0.490525	0.352537	-0.851076	-0.153233	0.332911	-0.205116	0.081686	-0.37078	0.198188	0.167273	0.172649	0.275225	-0.169147	-0.157755	0.203343	-0.329904	0.451195	-1.01064	0.284111
-4.64896	-0.459558	0.0390859	1.04617	0.489267	0.3536	-0.853565	-0.152669	0.332947	-0.204495	0.0828014	-0.370719	0.198192	0.167254	0.172657	0.275495	-0.170621	-0.157905	0.203385	-0.330024	0.451251	-1.01048	0.284177
-4.64848	-0.46041	0.0388256	1.04598	0.489209	0.354677	-0.854343	-0.152584	0.332943	-0.203569	0.0831566	-0.370146	0.198898	0.167073	0.172765	0.27534	-0.171457	-0.158179	0.203185	-0.330364	0.450938	-1.01044	0.284172
-4.648	-0.461033	0.0385484	1.04521	0.487834	0.355294	-0.855086	-0.152308	0.332939	-0.20361	0.0832137	-0.370071	0.199092	0.166335	0.172123	0.27448	-0.172482	-0.158334	0.203285	-0.330703	0.451152	-1.01063	0.284107
-4.64752	-0.462778	0.0386489	1.04462	0.486973	0.356213	-0.855443	-0.152303	0.332991	-0.202509	0.0837514	-0.369856	0.198675	0.166147	0.171973	0.273814	-0.173798	-0.158605	0.20268	-0.330689	0.451223	-1.01049	0.284014
-4.64704	-0.463923	0.038448	1.04451	0.486891	0.356421	-0.857061	-0.152074	0.333051	-0.201328	0.0842125	-0.369315	0.198563	0.166099	0.171769	0.273102	-0.17429	-0.158684	0.202287	-0.330851	0.450827	-1.0102	0.283968
-4.64656	-0.464913	0.038629	1.04441	0.487071	0.357421	-0.857897	-0.151493	0.333033	-0.200544	0.0840981	-0.368268	0.198807	0.166196	0.171665	0.273101	-0.175368	-0.15901	0.201797	-0.331251	0.450394	-1.00993	0.284229
-4.64608	-0.465525	0.0381703	1.04378	0.485565	0.357971	-0.857443	-0.151122	0.332893	-0.199696	0.0843846	-0.367903	0.198997	0.166329	0.171946	0.272835	-0.176235	-0.159035	0.201597	-0.331318	0.450272	-1.00982	0.284194
-4.6456	-0.467227	0.0383617	1.04341	0.485357	0.358987	-0.857967	-0.1506	0.332912	-0.199751	0.0850969	-0.36868	0.19851	0.165993	0.171704	0.2734	-0.17689	-0.159271	0.201804	-0.331459	0.45033	-1.00994	0.284165
-4.64512	-0.467783	0.0384986	1.04289	0.484822	0.360169	-0.859339	-0.15066	0.332977	-0.199445	0.0854688	-0.368383	0.198395	0.166373	0.171674	0.273607	-0.177953	-0.159574	0.202064	-0.331429	0.450285	-1.00986	0.284399
-4.64464	-0.469059	0.0385236	1.04263	0.485047	0.360699	-0.860269	-0.15108	0.332986	-0.199181	0.0857539	-0.368204	0.198928	0.166285	0.171473	0.273038	-0.178633	-0.15968	0.202155	-0.331168	0.450497	-1.00962	0.28461
-4.64416	-0.470025	0.0389971	1.04226	0.484004	0.361221	-0.860055	-0.150839	0.332991	-0.198443	0.0861207	-0.368226	0.19816	0.166249	0.171071	0.272645	-0.17948	-0.159813	0.202014	-0.331058	0.450643	-1.00962	0.284842
-4.64368	-0.471124	0.0390193	1.04294	0.483183	0.362121	-0.8609	-0.150148	0.332835	-0.198716	0.0865975	-0.367617	0.198524	0.166466	0.171031	0.272269	-0.18074	-0.159841	0.201914	-0.331098	0.450628	-1.00967	0.284818
-4.6432	-0.473338	0.0390893	1.04299	0.483545	0.362635	-0.861771	-0.149764	0.332777	-0.197955	0.0871711	-0.367652	0.198687	0.166385	0.171269	0.271697	-0.182382	-0.159876	0.202108	-0.331073	0.4507	-1.00991	0.285076
-4.64272	-0.47426	0.0404839	1.04309	0.483188	0.363305	-0.863262	-0.149692	0.333062	-0.197981	0.0879222	-0.367891	0.199452	0.166482	0.171718	0.271726	-0.18308	-0.160098	0.202092	-0.330883	0.45083	-1.01014	0.285109
-4.64224	-0.475132	0.0413061	1.043	0.482427	0.364148	-0.864272	-0.149821	0.333239	-0.197714	0.0888288	-0.367752	0.19927	0.165983	0.171074	0.272115	-0.184632	-0.160209	0.202111	-0.33072	0.450589	-1.00986	0.284964
-4.64176	-0.475913	0.0423417	1.044	0.48224	0.365096	-0.865133	-0.149318	0.333346	-0.197257	0.0893549	-0.367076	0.20008	0.165472	0.171063	0.272142	-0.185773	-0.160264	0.202194	-0.330632	0.450148	-1.0099	0.28487
-4.64128	-0.477392	0.0425935	1.04332	0.481907	0.366015	-0.865685	-0.14898	0.333452	-0.197335	0.0899607	-0.366738	0.200408	0.165524	0.171119	0.271981	-0.186621	-0.160211	0.202063	-0.330577	0.449929	-1.00997	0.284456
-4.6408	-0.478157	0.0431667	1.04454	0.482921	0.36619	-0.867237	-0.149273	0.333502	-0.197403	0.0906714	-0.366191	0.200538	0.165261	0.171185	0.271452	-0.188352	-0.160218	0.202298	-0.330592	0.449915	-1.00986	0.284383
-4.64032	-0.479511	0.0437095	1.04478	0.483218	0.366365	-0.867033	-0.149708	0.333571	-0.197759	0.0910923	-0.364955	0.200936	0.165341	0.171504	0.272274	-0.189779	-0.160339	0.202525	-0.330606	0.449809	-1.00949	0.284199
-4.63984	-0.480006	0.0443185	1.04495	0.482888	0.367385	-0.866437	-0.149334	0.333473	-0.197205	0.0915601	-0.363996	0.201008	0.165257	0.171529	0.27233	-0.190222	-0.160277	0.203165	-0.33043	0.449667	-1.0091	0.284378
-4.63936	-0.480803	0.0449503	1.04511	0.482332	0.368141	-0.867793	-0.148721	0.333389	-0.197245	0.0922928	-0.363495	0.201277	0.165258	0.171585	0.271765	-0.190839	-0.160373	0.203192	-0.330282	0.449829	-1.00903	0.284386
-4.63888	-0.481371	0.0460667	1.04541	0.481184	0.369002	-0.867015	-0.148411	0.333356	-0.196522	0.0933202	-0.362446	0.201156	0.165119	0.17175	0.270904	-0.192048	-0.160104	0.203325	-0.330452	0.449839	-1.00853	0.284905
-4.6384	-0.481375	0.0474179	1.04539	0.479938	0.369773	-0.866467	-0.14795	0.33349	-0.196714	0.0936322	-0.361777	0.200984	0.164909	0.171888	0.270643	-0.194015	-0.16011	0.203299	-0.330548	0.450063	-1.00808	0.284867
-4.63792	-0.482345	0.0484836	1.04573	0.479898	0.369738	-0.866832	-0.147507	0.333394	-0.19601	0.0942568	-0.359924	0.20127	0.164798	0.171892	0.270167	-0.194434	-0.160156	0.203168	-0.330451	0.44979	-1.0083	0.28452
-4.63744	-0.48291	0.049463	1.04552	0.479917	0.370485	-0.86599	-0.146794	0.333445	-0.196255	0.0947585	-0.358826	0.201386	0.164693	0.172161	0.26991	-0.196089	-0.16012	0.20312	-0.330616	0.449674	-1.00838	0.284609
-4.63696	-0.483338	0.0502477	1.046	0.479128	0.37142	-0.866125	-0.14639	0.333414	-0.195464	0.0957346	-0.357045	0.20147	0.164272	0.171962	0.269491	-0.197636	-0.160002	0.203146	-0.330391	0.449416	-1.00798	0.284932
-4.63648	-0.48449	0.0512881	1.04632	0.478426	0.372002	-0.866205	-0.145822	0.333331	-0.195112	0.0957667	-0.35561	0.20169	0.164009	0.172126	0.269166	-0.198416	-0.159812	0.203057	-0.330221	0.449498	-1.00782	0.284668
-4.636	-0.484979	0.0515444	1.0467	0.478993	0.372769	-0.867058	-0.145578	0.33345	-0.194949	0.0963543	-0.354294	0.20195	0.163981	0.172443	0.269039	-0.20002	-0.15986	0.203379	-0.330103	0.449537	-1.00806	0.285012
-4.63552	-0.485104	0.0519986	1.04683	0.47918	0.373437	-0.867948	-0.145093	0.333449	-0.194308	0.0968308	-0.353699	0.202262	0.163889	0.172524	0.26892	-0.201641	-0.159786	0.203196	-0.33005	0.449602	-1.00775	0.284966
-4.63504	-0.48647	0.0522811	1.04718	0.478905	0.374157	-0.867642	-0.14465	0.333439	-0.193695	0.097246	-0.352531	0.201904	0.163564	0.172585	0.268618	-0.202557	-0.159689	0.202889	-0.330183	0.449556	-1.00743	0.284844
-4.63456	-0.488286	0.052314	1.04764	0.477993	0.374414	-0.868651	-0.144084	0.333399	-0.193827	0.0974646	-0.351457	0.200859	0.163405	0.172932	0.268153	-0.204214	-0.159712	0.20247	-0.329936	0.449493	-1.0065	0.28524
-4.63408	-0.488699	0.0522594	1.04914	0.477728	0.374899	-0.868345	-0.143671	0.333365	-0.192507	0.0979217	-0.351231	0.201051	0.163234	0.17301	0.266996	-0.205511	-0.159692	0.202608	-0.329864	0.44941	-1.00639	0.285197
-4.6336	-0.488963	0.0524161	1.04909	0.478029	0.375409	-0.869494	-0.143403	0.333654	-0.191654	0.0981618	-0.350796	0.201154	0.163122	0.173146	0.26669	-0.206646	-0.159466	0.202865	-0.330093	0.449254	-1.00608	0.285216
-4.63312	-0.489358	0.0527519	1.04945	0.477922	0.376396	-0.869527	-0.143291	0.333495	-0.191528	0.098409	-0.349592	0.200489	0.162833	0.173641	0.265787	-0.206947	-0.159143	0.203498	-0.330013	0.448923	-1.0059	0.285168
-4.63264	-0.490186	0.0527289	1.05009	0.477034	0.377303	-0.870399	-0.142538	0.333618	-0.190513	0.0986527	-0.348705	0.200478	0.162946	0.173678	0.265752	-0.207817	-0.159286	0.203542	-0.330014	0.448756	-1.00596	0.285155
-4.63216	-0.491028	0.0527294	1.05035	0.476945	0.378749	-0.870986	-0.142158	0.333615	-0.189136	0.0990965	-0.348673	0.200686	0.162795	0.174046	0.265648	-0.208037	-0.159325	0.203782	-0.33034	0.448877	-1.00589	0.28519
-4.63168	-0.492429	0.0528274	1.05068	0.477081	0.379297	-0.871954	-0.141837	0.33358	-0.188641	0.0988075	-0.347604	0.201201	0.162878	0.174522	0.265881	-0.208548	-0.159112	0.203967	-0.330648	0.44904	-1.00548	0.284639
-4.6312	-0.491993	0.0529741	1.05037	0.477224	0.379889	-0.873327	-0.140819	0.333667	-0.188461	0.0985947	-0.347787	0.201422	0.162688	0.174763	0.266163	-0.209206	-0.158708	0.204052	-0.330884	0.448707	-1.00548	0.284469
-4.63072	-0.491786	0.0530974	1.05021	0.476849	0.380326	-0.873502	-0.140436	0.33393	-0.186321	0.0989679	-0.347405	0.200776	0.162572	0.175291	0.265955	-0.209461	-0.158602	0.204037	-0.331086	0.448897	-1.00539	0.283986
-4.63024	-0.492247	0.0534473	1.05038	0.478325	0.380979	-0.87412	-0.139873	0.333901	-0.185232	0.0994491	-0.345788	0.201095	0.162337	0.175431	0.265823	-0.209921	-0.158729	0.203919	-0.331172	0.448738	-1.00539	0.283545
-4.62976	-0.493381	0.0536775	1.04956	0.479516	0.382102	-0.875186	-0.139669	0.33397	-0.184592	0.0996805	-0.34482	0.20138	0.162174	0.175717	0.265289	-0.210427	-0.158562	0.204202	-0.331012	0.448772	-1.0052	0.283231
-4.62928	-0.493913	0.0537195	1.04999	0.479825	0.383182	-0.875848	-0.139003	0.334005	-0.183723	0.100009	-0.3442	0.200653	0.16216	0.175708	0.265216	-0.211708	-0.158453	0.204174	-0.331067	0.448727	-1.00493	0.283021
-4.6288	-0.494153	0.0538933	1.04958	0.479586	0.383766	-0.87746	-0.139163	0.333774	-0.182492	0.100051	-0.34281	0.199875	0.161751	0.176549	0.265119	-0.212718	-0.158356	0.204186	-0.3311	0.448827	-1.00482	0.283071
-4.62832	-0.495231	0.0542959	1.04984	0.479593	0.384121	-0.877263	-0.138327	0.333568	-0.182047	0.100491	-0.341835	0.199142	0.161398	0.176792	0.265012	-0.2149	-0.158129	0.204477	-0.331172	0.449189	-1.00462	0.28296
-4.62784	-0.495866	0.0547307	1.04981	0.480216	0.384812	-0.877908	-0.137368	0.333437	-0.181188	0.100501	-0.341023	0.198706	0.161571	0.176601	0.264616	-0.215606	-0.15797	0.204368	-0.331155	0.449252	-1.00431	0.282964
-4.62736	-0.49652	0.0549124	1.04989	0.480706	0.38553	-0.879088	-0.136982	0.333419	-0.179916	0.10053	-0.338919	0.19911	0.161476	0.176801	0.264889	-0.216621	-0.157903	0.204653	-0.331397	0.449323	-1.00376	0.282664
-4.62688	-0.49716	0.05441	1.051	0.480476	0.385841	-0.879698	-0.136932	0.333706	-0.178924	0.100686	-0.338053	0.199116	0.161087	0.176668	0.265923	-0.217176	-0.157846	0.204589	-0.331113	0.449358	-1.00376	0.282579
-4.6264	-0.497766	0.0541439	1.0511	0.480343	0.386866	-0.880456	-0.137309	0.333441	-0.178837	0.101099	-0.337075	0.198134	0.161055	0.176613	0.265771	-0.218713	-0.157917	0.205193	-0.330892	0.449369	-1.00333	0.282552
-4.62592	-0.49809	0.0543167	1.05106	0.480753	0.387782	-0.879997	-0.136881	0.333272	-0.177832	0.101564	-0.336658	0.197429	0.160898	0.176956	0.266223	-0.219783	-0.158089	0.204958	-0.330971	0.449463	-1.00293	0.282529
-4.62544	-0.498564	0.0545982	1.05194	0.480806	0.388381	-0.881082	-0.136688	0.333131	-0.177227	0.102041	-0.335685	0.197782	0.160647	0.17741	0.26616	-0.220742	-0.158009	0.204964	-0.331007	0.449991	-1.0025	0.282113
-4.62496	-0.499657	0.0554141	1.05168	0.481327	0.388878	-0.880711	-0.136418	0.332973	-0.175417	0.102516	-0.334169	0.197573	0.160631	0.177857	0.266061	-0.221605	-0.157782	0.205432	-0.330949	0.450304	-1.002	0.281925
-4.62448	-0.499998	0.0554932	1.05196	0.482433	0.389666	-0.88151	-0.13625	0.333117	-0.174829	0.103477	-0.333403	0.196983	0.160737	0.178205	0.266451	-0.222172	-0.157664	0.205491	-0.330835	0.45033	-1.00149	0.281865
-4.624	-0.501527	0.0557402	1.05224	0.483333	0.389996	-0.880567	-0.136147	0.333041	-0.17423	0.103316	-0.332345	0.197177	0.160433	0.178793	0.266114	-0.2232	-0.157524	0.205549	-0.33076	0.450159	-1.00105	0.282029
-4.62352	-0.503	0.0561835	1.05232	0.483664	0.390622	-0.87874	-0.135551	0.332977	-0.173202	0.103883	-0.330145	0.19728	0.160263	0.179071	0.266241	-0.223893	-0.157612	0.205412	-0.330706	0.450051	-1.00076	0.281773
-4.62304	-0.503115	0.0563122	1.05196	0.484081	0.391266	-0.879211	-0.135627	0.33287	-0.17219	0.104336	-0.329465	0.196662	0.160112	0.179854	0.266198	-0.225032	-0.157377	0.205437	-0.331213	0.449897	-1.00078	0.281292
-4.62256	-0.5036	0.0568761	1.05252	0.484123	0.391436	-0.879341	-0.135552	0.332873	-0.170982	0.104503	-0.328799	0.196525	0.159942	0.180295	0.266049	-0.225787	-0.157475	0.205595	-0.331118	0.449569	-1.00014	0.280972
-4.62208	-0.504293	0.0574201	1.05205	0.483367	0.392245	-0.879001	-0.134999	0.332722	-0.170336	0.105641	-0.327317	0.196325	0.159605	0.180853	0.266681	-0.227	-0.157338	0.205806	-0.330963	0.449643	-1.00021	0.280979
-4.6216	-0.504602	0.0575964	1.05108	0.483297	0.392543	-0.87913	-0.134998	0.332589	-0.169276	0.106337	-0.326111	0.196348	0.159581	0.181076	0.266778	-0.228326	-0.157117	0.205947	-0.33128	0.449362	-0.999647	0.280326
-4.62112	-0.504885	0.0582233	1.0514	0.482499	0.393036	-0.880013	-0.134879	0.332534	-0.167988	0.106915	-0.323164	0.196179	0.159643	0.181748	0.266567	-0.229118	-0.157252	0.205855	-0.331469	0.449498	-1.00019	0.279705
-4.62064	-0.505724	0.0582917	1.05118	0.483012	0.393378	-0.881138	-0.134589	0.332207	-0.166314	0.107846	-0.321253	0.196659	0.159664	0.18198	0.266258	-0.229948	-0.157089	0.205769	-0.331612	0.449631	-0.999868	0.278844
-4.62016	-0.506431	0.0583399	1.05143	0.483132	0.394349	-0.881616	-0.134335	0.332199	-0.165349	0.108299	-0.320577	0.196354	0.15975	0.18242	0.266766	-0.230882	-0.156922	0.206039	-0.331601	0.449847	-0.999962	0.278651
-4.61968	-0.506937	0.0591491	1.05178	0.48304	0.394487	-0.882815	-0.133735	0.332057	-0.164605	0.10883	-0.320305	0.196884	0.15985	0.182762	0.266924	-0.231967	-0.156847	0.206013	-0.331695	0.44969	-0.999259	0.27834
-4.6192	-0.507437	0.060005	1.05186	0.48295	0.394694	-0.882864	-0.133629	0.331631	-0.163698	0.109605	-0.319743	0.197007	0.159836	0.183375	0.267537	-0.233372	-0.156569	0.205782	-0.331706	0.450021	-0.998908	0.278139
-4.61872	-0.507839	0.0602142	1.05273	0.482042	0.395196	-0.883261	-0.133806	0.331345	-0.163183	0.110316	-0.319209	0.197064	0.15982	0.183896	0.268192	-0.234333	-0.156801	0.20581	-0.3318	0.45015	-0.999041	0.277579
-4.61824	-0.50795	0.0603299	1.05351	0.481908	0.395427	-0.884006	-0.133268	0.331214	-0.162149	0.110305	-0.317598	0.19732	0.15976	0.184356	0.268615	-0.235374	-0.156753	0.205979	-0.331743	0.45018	-0.99933	0.277271
-4.61776	-0.50822	0.0607325	1.05359	0.482486	0.395573	-0.884422	-0.132899	0.331047	-0.160777	0.110757	-0.317326	0.196602	0.159268	0.184843	0.26851	-0.236	-0.1566	0.205781	-0.331749	0.450604	-0.999588	0.277023
-4.61728	-0.508885	0.0610012	1.05376	0.481733	0.395901	-0.883519	-0.132191	0.330771	-0.159546	0.111127	-0.314973	0.196274	0.15946	0.1849	0.269045	-0.237041	-0.156441	0.205815	-0.331211	0.450924	-0.999313	0.276693
-4.6168	-0.509808	0.0610884	1.0539	0.481128	0.396577	-0.883953	-0.131106	0.330585	-0.158846	0.111265	-0.313812	0.196484	0.159673	0.185312	0.270051	-0.238257	-0.156421	0.205983	-0.330937	0.451031	-0.999494	0.276244
-4.61632	-0.509786	0.0613268	1.05409	0.48055	0.39718	-0.885247	-0.130302	0.330657	-0.157644	0.111935	-0.313544	0.195946	0.159297	0.185408	0.270339	-0.238718	-0.156539	0.206262	-0.330999	0.450853	-0.999321	0.275945
-4.61584	-0.510179	0.0612857	1.05417	0.480827	0.397713	-0.885297	-0.129754	0.330491	-0.155831	0.112611	-0.312943	0.195493	0.159254	0.185682	0.270841	-0.239062	-0.156377	0.206645	-0.330939	0.451168	-0.99984	0.275774
-4.61536	-0.510063	0.0617736	1.05455	0.480195	0.398403	-0.885631	-0.128547	0.33018	-0.154779	0.113182	-0.31264	0.196274	0.158915	0.186171	0.271311	-0.240824	-0.156272	0.206836	-0.330833	0.450975	-0.999725	0.275339
-4.61488	-0.509975	0.0615846	1.05533	0.480098	0.398797	-0.884546	-0.128062	0.330101	-0.154218	0.113454	-0.31286	0.196296	0.158635	0.186262	0.271209	-0.241839	-0.156053	0.206881	-0.330895	0.450824	-0.999863	0.27506
-4.6144	-0.510254	0.0621024	1.05579	0.479995	0.39901	-0.883141	-0.127819	0.330153	-0.153399	0.11376	-0.311696	0.195802	0.158385	0.186665	0.270571	-0.242236	-0.155903	0.206947	-0.330908	0.450928	-0.999866	0.275319
-4.61392	-0.511348	0.0630332	1.05543	0.478768	0.399084	-0.882957	-0.126721	0.330234	-0.152364	0.11402	-0.31164	0.195161	0.158131	0.18708	0.270719	-0.242544	-0.155779	0.207037	-0.330694	0.451575	-0.999925	0.275028
-4.61344	-0.512563	0.0636001	1.05594	0.478808	0.399488	-0.881873	-0.126059	0.330147	-0.151081	0.114518	-0.311026	0.194896	0.158308	0.187417	0.270261	-0.244004	-0.155709	0.20724	-0.330373	0.451695	-0.999649	0.274832
-4.61296	-0.514373	0.063448	1.05592	0.478661	0.400428	-0.879898	-0.126439	0.32981	-0.150875	0.115035	-0.310537	0.194394	0.157992	0.187581	0.27036	-0.244298	-0.155439	0.207705	-0.330456	0.45176	-0.999514	0.274655
-4.61248	-0.51454	0.0636486	1.05574	0.47667	0.400385	-0.880479	-0.125449	0.329669	-0.150718	0.115781	-0.309444	0.194452	0.157605	0.187659	0.269341	-0.245526	-0.155588	0.207686	-0.330493	0.452216	-0.999061	0.27431
-4.612	-0.515179	0.063525	1.05567	0.475456	0.401147	-0.880599	-0.125855	0.329645	-0.149424	0.116324	-0.308245	0.19372	0.157154	0.187754	0.269866	-0.246419	-0.155293	0.207628	-0.330264	0.452307	-0.999369	0.273972
-4.61152	-0.516014	0.0636028	1.05606	0.475602	0.401704	-0.87866	-0.125228	0.3296	-0.147272	0.116964	-0.307842	0.193184	0.156691	0.187312	0.269858	-0.246896	-0.15554	0.207764	-0.330412	0.452601	-1.00005	0.273417
-4.61104	-0.516997	0.0643154	1.0556	0.475173	0.40211	-0.877626	-0.125143	0.329491	-0.147117	0.117599	-0.30812	0.192672	0.156423	0.18706	0.27022	-0.247406	-0.155426	0.208312	-0.330426	0.452418	-1.00014	0.273253
-4.61056	-0.517537	0.0647157	1.05535	0.475235	0.402553	-0.877711	-0.124868	0.329342	-0.145757	0.118538	-0.309782	0.193151	0.15649	0.187074	0.269938	-0.247987	-0.155137	0.208506	-0.330056	0.452435	-1.00032	0.273355
-4.61008	-0.518029	0.0649651	1.05603	0.474869	0.402833	-0.876505	-0.124827	0.329233	-0.144605	0.119035	-0.30975	0.192709	0.156267	0.186658	0.270415	-0.248469	-0.155232	0.208355	-0.33051	0.452535	-1.00091	0.273165
-4.6096	-0.519059	0.065452	1.05526	0.474583	0.403033	-0.876383	-0.124332	0.329174	-0.143537	0.119607	-0.308899	0.192346	0.155971	0.186675	0.270135	-0.248129	-0.155341	0.208959	-0.330462	0.452775	-1.00076	0.272883
-4.60912	-0.519741	0.0660196	1.05529	0.474448	0.403116	-0.875211	-0.123293	0.328997	-0.142639	0.120386	-0.307178	0.191928	0.15567	0.186816	0.270003	-0.248024	-0.155052	0.209016	-0.330323	0.453096	-1.00149	0.272459
-4.60864	-0.520697	0.0663786	1.05543	0.473538	0.403789	-0.874523	-0.123053	0.328934	-0.142025	0.121373	-0.306385	0.191473	0.155514	0.186927	0.270233	-0.248443	-0.154933	0.209347	-0.330151	0.453425	-1.00178	0.27243
-4.60816	-0.521234	0.0668016	1.0558	0.472912	0.404074	-0.875058	-0.123159	0.328745	-0.141558	0.122158	-0.305171	0.191505	0.155136	0.186703	0.270988	-0.248924	-0.154811	0.209743	-0.330152	0.453637	-1.00296	0.27231
-4.60768	-0.521796	0.0679015	1.05619	0.47171	0.403756	-0.874774	-0.122391	0.328666	-0.141069	0.122487	-0.303837	0.189941	0.155152	0.186529	0.270603	-0.24961	-0.154554	0.21023	-0.330337	0.454166	-1.00279	0.27194
-4.6072	-0.523159	0.0683893	1.05624	0.470848	0.403894	-0.874706	-0.121848	0.32849	-0.140155	0.123602	-0.303324	0.18952	0.15529	0.185964	0.270411	-0.250293	-0.154328	0.210888	-0.330481	0.454676	-1.0037	0.272088
-4.60672	-0.523755	0.0687498	1.05593	0.4711	0.403871	-0.874623	-0.121486	0.328395	-0.138943	0.123936	-0.303258	0.189051	0.155347	0.185869	0.270485	-0.2506	-0.154221	0.21143	-0.330591	0.454798	-1.00432	0.271632
-4.60624	-0.523834	0.0692419	1.05564	0.470268	0.403902	-0.874283	-0.121333	0.328276	-0.138187	0.124459	-0.302906	0.189367	0.155356	0.185675	0.27037	-0.250759	-0.154121	0.211708	-0.330876	0.454809	-1.00383	0.271595
-4.60576	-0.523869	0.0694337	1.05507	0.469914	0.403845	-0.873967	-0.121387	0.328355	-0.137201	0.125086	-0.302757	0.188822	0.155079	0.185834	0.270434	-0.251216	-0.153893	0.212216	-0.331189	0.45492	-1.00356	0.271493
-4.60528	-0.524234	0.0694748	1.055	0.469171	0.40385	-0.872107	-0.120918	0.328541	-0.137142	0.12564	-0.301577	0.188039	0.154797	0.185556	0.270823	-0.251043	-0.15362	0.212641	-0.331452	0.455013	-1.00392	0.271634
-4.6048	-0.524204	0.0696674	1.05517	0.469309	0.403948	-0.872554	-0.120956	0.328628	-0.136042	0.125987	-0.301043	0.187725	0.154724	0.185657	0.270729	-0.251568	-0.153386	0.213045	-0.331346	0.454665	-1.00448	0.271657
-4.60432	-0.523904	0.070088	1.0553	0.468772	0.404323	-0.873163	-0.120466	0.328473	-0.135059	0.126011	-0.300058	0.186425	0.154529	0.185503	0.271351	-0.251384	-0.153004	0.21349	-0.331387	0.454841	-1.00512	0.27195
-4.60384	-0.524483	0.0706708	1.05527	0.468413	0.404905	-0.873133	-0.11992	0.328421	-0.134413	0.126253	-0.300184	0.186307	0.154293	0.185336	0.271519	-0.251522	-0.152658	0.213735	-0.331317	0.454889	-1.00445	0.272091
-4.60336	-0.524988	0.0711069	1.05603	0.468559	0.404978	-0.872713	-0.120043	0.328517	-0.133843	0.127264	-0.299977	0.186141	0.153774	0.185368	0.271723	-0.251516	-0.152371	0.214184	-0.331396	0.454814	-1.00469	0.271332
-4.60288	-0.52601	0.0704231	1.05701	0.468042	0.404608	-0.871644	-0.119958	0.328585	-0.133451	0.128215	-0.299943	0.186287	0.153445	0.185633	0.272378	-0.251583	-0.152298	0.21465	-0.331612	0.454821	-1.00425	0.271327
-4.6024	-0.52622	0.0701235	1.05726	0.468015	0.404552	-0.872222	-0.119715	0.328277	-0.132919	0.128969	-0.298947	0.186292	0.152944	0.185883	0.272327	-0.251469	-0.152037	0.215068	-0.331641	0.454752	-1.00381	0.271446
-4.60192	-0.526703	0.0702665	1.05712	0.466617	0.404846	-0.871563	-0.119878	0.328247	-0.13204	0.129578	-0.299086	0.18618	0.152517	0.185724	0.272382	-0.251633	-0.151878	0.215381	-0.331777	0.454889	-1.00296	0.271409
-4.60144	-0.527339	0.0706772	1.05712	0.466949	0.405063	-0.869256	-0.119053	0.328301	-0.131353	0.130343	-0.297765	0.186068	0.152487	0.185676	0.272527	-0.251955	-0.151618	0.215654	-0.331812	0.454706	-1.00293	0.270783
-4.60096	-0.527889	0.0713323	1.05791	0.467266	0.405404	-0.869006	-0.118411	0.328193	-0.130139	0.131397	-0.297439	0.186186	0.152219	0.184964	0.272479	-0.251516	-0.151474	0.215682	-0.331869	0.454919	-1.00302	0.270479
-4.60048	-0.527714	0.0714363	1.05786	0.466871	0.406497	-0.867744	-0.117935	0.327938	-0.129871	0.132615	-0.296652	0.185558	0.152103	0.184662	0.272079	-0.251747	-0.151397	0.215887	-0.331748	0.455091	-1.00269	0.270233
-4.6	-0.528067	0.0721821	1.05754	0.467617	0.406753	-0.865415	-0.117409	0.327868	-0.12897	0.133832	-0.296821	0.185101	0.151513	0.184323	0.272135	-0.25188	-0.151007	0.215462	-0.331542	0.455655	-1.00245	0.269684
-4.59952	-0.528285	0.0716339	1.05665	0.467034	0.407134	-0.864351	-0.116628	0.32779	-0.128299	0.134347	-0.297584	0.184359	0.151023	0.184174	0.272317	-0.252295	-0.150607	0.215859	-0.331665	0.455665	-1.00273	0.269446
-4.59904	-0.528898	0.0717707	1.05738	0.468385	0.407843	-0.860845	-0.115728	0.327663	-0.127912	0.13523	-0.29737	0.184205	0.150539	0.184221	0.272281	-0.252866	-0.150321	0.216504	-0.33144	0.45572	-1.00378	0.269572
-4.59856	-0.52884	0.0717127	1.05697	0.468563	0.407828	-0.859953	-0.115434	0.327518	-0.127644	0.136677	-0.297547	0.184052	0.150197	0.184075	0.272208	-0.252571	-0.150111	0.217074	-0.33142	0.456182	-1.00368	0.269063
-4.59808	-0.529547	0.0722584	1.05691	0.469725	0.408306	-0.856769	-0.114769	0.327359	-0.127224	0.136902	-0.298115	0.183266	0.14982	0.184028	0.272112	-0.252398	-0.149792	0.217625	-0.331303	0.456012	-1.00341	0.268878
-4.5976	-0.529699	0.0713946	1.05705	0.469646	0.408793	-0.855363	-0.114416	0.327289	-0.126498	0.137843	-0.298195	0.183503	0.149402	0.184365	0.271964	-0.252091	-0.149485	0.218334	-0.331309	0.455879	-1.00297	0.26869
-4.59712	-0.529868	0.0716177	1.05625	0.470768	0.409381	-0.853823	-0.114425	0.327124	-0.126055	0.139278	-0.298391	0.182813	0.148998	0.184246	0.271872	-0.252517	-0.149409	0.218431	-0.331113	0.455716	-1.00273	0.268691
-4.59664	-0.530165	0.0722867	1.05622	0.471942	0.410112	-0.852354	-0.114311	0.327153	-0.125668	0.140487	-0.298429	0.183042	0.148815	0.184385	0.271991	-0.252457	-0.14915	0.21865	-0.331313	0.455257	-1.00259	0.268549
-4.59616	-0.530143	0.0728491	1.05612	0.472758	0.410583	-0.851478	-0.114352	0.326825	-0.12561	0.141797	-0.298113	0.182848	0.148471	0.184038	0.27179	-0.252055	-0.148868	0.219276	-0.331241	0.454936	-1.00268	0.268197
-4.59568	-0.530312	0.0735733	1.05504	0.474107	0.410664	-0.85068	-0.113509	0.326806	-0.125257	0.142432	-0.298577	0.182855	0.148204	0.184063	0.271866	-0.251807	-0.148986	0.219412	-0.331205	0.454933	-1.00294	0.267833
-4.5952	-0.530522	0.0737356	1.05509	0.476083	0.411447	-0.84854	-0.113695	0.326666	-0.124409	0.143579	-0.299425	0.182371	0.147948	0.183489	0.271946	-0.252294	-0.1485	0.219812	-0.331343	0.454957	-1.0026	0.267903
-4.59472	-0.530118	0.0742898	1.05509	0.476982	0.411862	-0.846021	-0.11371	0.326756	-0.123764	0.144775	-0.298993	0.181892	0.147789	0.183045	0.271844	-0.252026	-0.148208	0.220176	-0.33156	0.454519	-1.00282	0.268273
-4.59424	-0.529977	0.0745495	1.05447	0.478179	0.412475	-0.84599	-0.113229	0.326538	-0.123768	0.145211	-0.297982	0.181352	0.147668	0.182596	0.27167	-0.252754	-0.147961	0.220198	-0.331872	0.454661	-1.00332	0.268058
-4.59376	-0.529724	0.0749093	1.05512	0.478916	0.412888	-0.845704	-0.113448	0.326543	-0.124002	0.146361	-0.298364	0.181124	0.147265	0.182126	0.271543	-0.253214	-0.147763	0.220372	-0.332368	0.454718	-1.00394	0.267384
-4.59328	-0.529847	0.0753525	1.05555	0.480457	0.413475	-0.842872	-0.11309	0.326355	-0.123854	0.147233	-0.298573	0.180748	0.14711	0.181288	0.271702	-0.254045	-0.147476	0.22056	-0.332595	0.45478	-1.00414	0.26723
-4.5928	-0.529873	0.0759497	1.05538	0.481351	0.413954	-0.841822	-0.112559	0.326212	-0.123362	0.14789	-0.299	0.181116	0.146788	0.180947	0.27181	-0.254232	-0.147072	0.220827	-0.332849	0.454445	-1.00469	0.266989
-4.59232	-0.530126	0.0764068	1.0551	0.482352	0.414777	-0.8417	-0.112218	0.325989	-0.122821	0.14845	-0.298952	0.18061	0.146424	0.180904	0.271783	-0.254346	-0.146599	0.22118	-0.332803	0.454444	-1.00488	0.266709
-4.59184	-0.529701	0.0761778	1.05565	0.482762	0.414983	-0.840609	-0.111695	0.325661	-0.122079	0.149655	-0.298547	0.179473	0.146137	0.180603	0.271538	-0.254626	-0.14628	0.221342	-0.333408	0.454543	-1.00547	0.266045
-4.59136	-0.529693	0.0766072	1.05579	0.485037	0.415236	-0.839557	-0.111813	0.325547	-0.121879	0.150142	-0.299154	0.179074	0.145795	0.180607	0.271599	-0.254753	-0.145922	0.221321	-0.333403	0.454461	-1.00493	0.265812
-4.59088	-0.530159	0.0775789	1.05589	0.486004	0.415842	-0.839198	-0.112058	0.325442	-0.122079	0.150804	-0.298691	0.178295	0.145536	0.180108	0.27176	-0.255124	-0.145627	0.221355	-0.333433	0.454299	-1.0051	0.265774
-4.5904	-0.530115	0.0783287	1.05579	0.486373	0.41651	-0.838725	-0.111347	0.32538	-0.122593	0.15132	-0.298154	0.177311	0.145247	0.179786	0.271607	-0.255299	-0.145378	0.221414	-0.333541	0.454359	-1.00523	0.265286
-4.58992	-0.530949	0.078512	1.05617	0.487657	0.416931	-0.837743	-0.111234	0.32528	-0.123081	0.151987	-0.299308	0.176735	0.145109	0.179084	0.271881	-0.255271	-0.145094	0.221551	-0.333349	0.454505	-1.00502	0.265701
-4.58944	-0.531995	0.0789067	1.05623	0.488484	0.417644	-0.836636	-0.111103	0.325076	-0.122381	0.153294	-0.299474	0.176011	0.145328	0.178664	0.272188	-0.255419	-0.144794	0.222133	-0.333184	0.45424	-1.00533	0.265479
-4.58896	-0.53309	0.079608	1.05623	0.488164	0.418202	-0.834503	-0.111739	0.324982	-0.121976	0.154188	-0.29914	0.175688	0.144759	0.178801	0.272032	-0.255467	-0.144491	0.222264	-0.333128	0.454199	-1.00549	0.265376
-4.58848	-0.533608	0.0801636	1.05626	0.489393	0.418407	-0.832863	-0.111425	0.324853	-0.121353	0.154778	-0.299354	0.175658	0.144478	0.177916	0.272229	-0.25594	-0.144234	0.22278	-0.333043	0.4539	-1.0061	0.26511
-4.588	-0.534841	0.0803093	1.05545	0.489963	0.418813	-0.83285	-0.110867	0.324852	-0.12081	0.155278	-0.300544	0.17502	0.144603	0.178136	0.271813	-0.256417	-0.14373	0.222837	-0.33262	0.453924	-1.00631	0.265099
-4.58752	-0.535115	0.0807148	1.05527	0.490822	0.418847	-0.831845	-0.109955	0.32473	-0.12017	0.155755	-0.300057	0.175242	0.144234	0.177555	0.271787	-0.256963	-0.143549	0.222993	-0.332121	0.453651	-1.00616	0.264936
-4.58704	-0.535484	0.0808604	1.05547	0.490638	0.419245	-0.832443	-0.110016	0.324702	-0.120567	0.156624	-0.30021	0.174252	0.144146	0.177237	0.271574	-0.257252	-0.143132	0.223396	-0.331649	0.453726	-1.00588	0.264513
-4.58656	-0.536725	0.0813374	1.05475	0.492576	0.419226	-0.831928	-0.110402	0.324559	-0.11978	0.156929	-0.299658	0.17369	0.144228	0.176732	0.271402	-0.258137	-0.142866	0.223396	-0.331107	0.453797	-1.00656	0.264292
-4.58608	-0.536415	0.0809746	1.0549	0.493161	0.419904	-0.831621	-0.11004	0.324356	-0.119812	0.157064	-0.299522	0.173373	0.144121	0.176471	0.271594	-0.258953	-0.142251	0.223583	-0.330911	0.453608	-1.00714	0.263764
-4.5856	-0.536445	0.081079	1.05444	0.49361	0.4204	-0.830265	-0.110286	0.324608	-0.119548	0.15717	-0.300118	0.173113	0.144143	0.17659	0.271572	-0.25918	-0.141791	0.223608	-0.331083	0.45355	-1.00728	0.263789
-4.58512	-0.537565	0.0808656	1.0542	0.494703	0.421197	-0.829567	-0.109836	0.32458	-0.118919	0.15752	-0.299798	0.172344	0.144163	0.176623	0.271796	-0.259459	-0.141073	0.223769	-0.330499	0.453109	-1.00777	0.263319
-4.58464	-0.537103	0.0821344	1.05446	0.495853	0.421369	-0.829615	-0.109651	0.324435	-0.11859	0.15773	-0.300082	0.171631	0.143902	0.175861	0.271856	-0.260019	-0.140853	0.223934	-0.330276	0.452486	-1.00787	0.262709
-4.58416	-0.537436	0.0828835	1.05458	0.496456	0.421593	-0.830009	-0.10939	0.324423	-0.119435	0.157797	-0.29988	0.170565	0.143509	0.175594	0.271893	-0.260158	-0.140506	0.224079	-0.330176	0.452424	-1.00774	0.262107
-4.58368	-0.538287	0.0836613	1.05471	0.496342	0.422412	-0.828354	-0.109199	0.324672	-0.119039	0.158114	-0.299006	0.170416	0.142978	0.175454	0.271788	-0.259965	-0.140147	0.224351	-0.329594	0.45233	-1.0077	0.261694
-4.5832	-0.538897	0.0843031	1.05452	0.495971	0.422738	-0.828184	-0.109152	0.324688	-0.11867	0.158567	-0.299032	0.170123	0.142417	0.175412	0.271144	-0.260327	-0.140169	0.224528	-0.329414	0.45262	-1.00755	0.261362
-4.58272	-0.539577	0.0842868	1.05428	0.497088	0.423441	-0.826478	-0.108988	0.324555	-0.118791	0.159094	-0.298893	0.169431	0.142188	0.175652	0.270947	-0.260789	-0.139983	0.224743	-0.329268	0.452518	-1.00751	0.260542
-4.58224	-0.54036	0.0849476	1.0539	0.497492	0.423833	-0.825179	-0.109009	0.324508	-0.118466	0.159275	-0.299438	0.168993	0.1419	0.175749	0.269772	-0.260733	-0.139661	0.22479	-0.3289	0.45221	-1.00747	0.260114
-4.58176	-0.541141	0.0855196	1.05428	0.497636	0.424246	-0.82496	-0.109205	0.324309	-0.119168	0.159441	-0.298883	0.168548	0.141332	0.175729	0.269502	-0.261047	-0.139238	0.224903	-0.328472	0.451835	-1.00804	0.260196
-4.58128	-0.541671	0.0856143	1.05367	0.498772	0.425122	-0.823765	-0.108842	0.324201	-0.118769	0.159111	-0.299284	0.167744	0.140747	0.175806	0.269134	-0.261224	-0.138953	0.225116	-0.328171	0.451578	-1.00812	0.260098
-4.5808	-0.541934	0.0860365	1.0538	0.499284	0.42514	-0.824589	-0.108553	0.324379	-0.118516	0.159477	-0.299111	0.16732	0.140289	0.175062	0.269439	-0.260786	-0.138752	0.225496	-0.327928	0.451417	-1.00877	0.259455
-4.58032	-0.542407	0.0863976	1.05399	0.500252	0.425203	-0.825656	-0.108705	0.324024	-0.118389	0.159254	-0.299475	0.16704	0.139932	0.174748	0.269432	-0.260519	-0.138372	0.225851	-0.327497	0.450956	-1.00902	0.259445
-4.57984	-0.542712	0.0872618	1.05348	0.500926	0.425996	-0.826316	-0.109197	0.324023	-0.117843	0.159484	-0.299999	0.166429	0.139692	0.174406	0.269719	-0.260322	-0.137853	0.226012	-0.327079	0.450682	-1.01023	0.258761
-4.57936	-0.543035	0.087467	1.05365	0.501766	0.426453	-0.827646	-0.109612	0.323898	-0.117793	0.159765	-0.298396	0.166436	0.139104	0.174482	0.269378	-0.260422	-0.137628	0.226302	-0.326992	0.450324	-1.00996	0.258107
-4.57888	-0.542291	0.0877647	1.05308	0.502112	0.426732	-0.826666	-0.110052	0.323731	-0.118459	0.159681	-0.299314	0.165773	0.138668	0.174567	0.268349	-0.260207	-0.137419	0.226415	-0.326887	0.450088	-1.01011	0.257599
-4.5784	-0.542827	0.0884899	1.05225	0.503114	0.42702	-0.82713	-0.109755	0.323713	-0.118403	0.159379	-0.298336	0.165128	0.138428	0.174459	0.268156	-0.259858	-0.137194	0.226851	-0.326851	0.449893	-1.00971	0.257137
-4.57792	-0.542583	0.0891761	1.05158	0.503986	0.426966	-0.827602	-0.109301	0.323469	-0.119061	0.15917	-0.298359	0.164599	0.137655	0.174378	0.267586	-0.260118	-0.136979	0.227535	-0.326916	0.449883	-1.00901	0.256738
-4.57744	-0.542936	0.0900358	1.05109	0.505224	0.427409	-0.8281	-0.109201	0.323342	-0.118979	0.159117	-0.297855	0.165534	0.137387	0.174036	0.267632	-0.260305	-0.136919	0.22833	-0.326577	0.44971	-1.00926	0.255961
-4.57696	-0.543282	0.0903075	1.05049	0.506631	0.427471	-0.828827	-0.108629	0.32325	-0.118766	0.159503	-0.298252	0.165127	0.13683	0.173599	0.267274	-0.259908	-0.136736	0.228766	-0.326161	0.449557	-1.01035	0.255502
-4.57648	-0.543541	0.0903154	1.04959	0.507401	0.427696	-0.828925	-0.108418	0.322971	-0.118222	0.1601	-0.298455	0.164542	0.136116	0.17333	0.26757	-0.259686	-0.136573	0.22938	-0.325911	0.449053	-1.01052	0.254914
-4.576	-0.544592	0.0905896	1.04907	0.508366	0.428505	-0.829114	-0.108593	0.322763	-0.117844	0.160549	-0.298353	0.164414	0.13587	0.173059	0.267675	-0.259359	-0.136207	0.230347	-0.325621	0.448711	-1.012	0.254825
-4.57552	-0.545202	0.0907984	1.04854	0.509107	0.428889	-0.828675	-0.108276	0.322544	-0.117737	0.160704	-0.297939	0.164556	0.135424	0.172843	0.267296	-0.259626	-0.136038	0.231246	-0.325497	0.448391	-1.01275	0.254557
-4.57504	-0.545693	0.0910175	1.04804	0.510289	0.429122	-0.829131	-0.107118	0.322518	-0.117257	0.160946	-0.297563	0.164172	0.134894	0.172258	0.267243	-0.259737	-0.135931	0.232364	-0.325175	0.448169	-1.01359	0.254309
-4.57456	-0.54569	0.0910186	1.04772	0.510736	0.429868	-0.830157	-0.106969	0.322316	-0.116539	0.160578	-0.296877	0.163706	0.134462	0.17178	0.266891	-0.259674	-0.136022	0.233156	-0.324908	0.44774	-1.01495	0.25409
-4.57408	-0.54583	0.0907675	1.04705	0.511027	0.429899	-0.831243	-0.106573	0.322375	-0.116442	0.160678	-0.296322	0.163571	0.134071	0.171366	0.267034	-0.259414	-0.135817	0.233696	-0.324775	0.447548	-1.01585	0.253729
-4.5736	-0.545706	0.0910197	1.04688	0.511516	0.430346	-0.831311	-0.106172	0.322417	-0.115819	0.160655	-0.29546	0.162989	0.134127	0.171242	0.267104	-0.259223	-0.135521	0.234448	-0.324924	0.447017	-1.01711	0.25332
-4.57312	-0.545793	0.0916804	1.04602	0.51175	0.430776	-0.83126	-0.105857	0.322381	-0.115621	0.160793	-0.295394	0.162134	0.133701	0.170816	0.267637	-0.258827	-0.135375	0.235045	-0.324897	0.446981	-1.01804	0.253094
-4.57264	-0.545781	0.091824	1.04518	0.51234	0.43101	-0.831563	-0.105493	0.322343	-0.115106	0.160735	-0.296163	0.161547	0.133493	0.170783	0.267563	-0.259218	-0.135107	0.235671	-0.324742	0.446638	-1.01849	0.252568
-4.57216	-0.545135	0.0916572	1.04382	0.512833	0.431454	-0.832271	-0.105753	0.322242	-0.11478	0.161597	-0.296146	0.161232	0.133018	0.170639	0.267364	-0.259335	-0.134898	0.23602	-0.324581	0.446844	-1.01919	0.252386
-4.57168	-0.546498	0.091462	1.04391	0.51368	0.432106	-0.834109	-0.105831	0.322322	-0.114862	0.162205	-0.295721	0.160852	0.132749	0.170359	0.267473	-0.258867	-0.134602	0.23715	-0.324242	0.44676	-1.01966	0.252108
-4.5712	-0.546724	0.0915772	1.04376	0.514278	0.432932	-0.835439	-0.105411	0.322381	-0.115123	0.162112	-0.295139	0.15976	0.132336	0.169749	0.266558	-0.258829	-0.134042	0.238064	-0.324051	0.446608	-1.01997	0.251755
-4.57072	-0.546974	0.0920666	1.04329	0.514838	0.433433	-0.835231	-0.105421	0.322338	-0.114874	0.162123	-0.294584	0.159147	0.132069	0.169581	0.266351	-0.258954	-0.13381	0.238996	-0.32382	0.446615	-1.02037	0.251411
-4.57024	-0.547031	0.0921987	1.04267	0.514154	0.433746	-0.835614	-0.105441	0.322698	-0.115026	0.162189	-0.294638	0.158917	0.131784	0.169804	0.266386	-0.258888	-0.133363	0.239466	-0.323736	0.446579	-1.02069	0.250823
-4.56976	-0.547598	0.0915695	1.04256	0.515376	0.434858	-0.835823	-0.105497	0.322811	-0.114791	0.161858	-0.295145	0.158535	0.13136	0.169957	0.266054	-0.25894	-0.133139	0.24024	-0.323537	0.446667	-1.0211	0.250531
-4.56928	-0.548116	0.0919483	1.04153	0.515118	0.435568	-0.835298	-0.105787	0.322801	-0.114136	0.161587	-0.295282	0.158319	0.130862	0.169826	0.265392	-0.25893	-0.133093	0.241226	-0.323291	0.446876	-1.02137	0.250491
-4.5688	-0.548512	0.0916819	1.04062	0.515878	0.435693	-0.836332	-0.10523	0.322729	-0.113076	0.16169	-0.294167	0.157946	0.130722	0.170166	0.265033	-0.258776	-0.133004	0.241867	-0.323113	0.446831	-1.02156	0.250163
-4.56832	-0.547896	0.0920979	1.03975	0.515929	0.436039	-0.836931	-0.104735	0.322765	-0.112985	0.161749	-0.294263	0.157922	0.130585	0.170125	0.264431	-0.259163	-0.132794	0.242895	-0.32289	0.446525	-1.02218	0.249841
-4.56784	-0.547223	0.0921565	1.03921	0.516676	0.436228	-0.836765	-0.104575	0.322771	-0.11197	0.161773	-0.292454	0.157672	0.130232	0.17025	0.26401	-0.259212	-0.132584	0.243408	-0.322563	0.4467	-1.02309	0.249671
-4.56736	-0.547794	0.0924553	1.03924	0.516712	0.436449	-0.838118	-0.104869	0.322869	-0.111256	0.161125	-0.292742	0.157854	0.130139	0.170155	0.263671	-0.259637	-0.132301	0.244041	-0.322334	0.446416	-1.02364	0.249049
-4.56688	-0.54759	0.0920302	1.03853	0.517181	0.436533	-0.838112	-0.105428	0.32292	-0.110781	0.161356	-0.292564	0.156715	0.130276	0.170054	0.263443	-0.260103	-0.131612	0.244446	-0.322265	0.446247	-1.02431	0.248523
-4.5664	-0.546908	0.0919133	1.03789	0.518	0.436401	-0.83611	-0.105606	0.322906	-0.111048	0.161324	-0.291968	0.156354	0.129982	0.169983	0.262808	-0.259755	-0.131426	0.245231	-0.321868	0.44565	-1.02425	0.248262
-4.56592	-0.546201	0.091767	1.03714	0.518883	0.437159	-0.836732	-0.10537	0.322981	-0.110953	0.161128	-0.291589	0.155603	0.129679	0.169972	0.262163	-0.259752	-0.131072	0.24573	-0.321593	0.445306	-1.02451	0.247448
-4.56544	-0.54643	0.0915028	1.03631	0.519632	0.437726	-0.836565	-0.104997	0.323038	-0.111138	0.16116	-0.291202	0.15503	0.129556	0.170427	0.261762	-0.259333	-0.130779	0.246129	-0.321424	0.445021	-1.0245	0.247275
-4.56496	-0.546512	0.0917161	1.03631	0.520871	0.438385	-0.837287	-0.104055	0.323239	-0.111443	0.161067	-0.291332	0.154514	0.129332	0.170752	0.261533	-0.258988	-0.130531	0.246566	-0.321114	0.444783	-1.02472	0.246963
-4.56448	-0.547022	0.0922496	1.03598	0.521153	0.438762	-0.837899	-0.103923	0.32327	-0.11126	0.160886	-0.28966	0.153474	0.129123	0.170484	0.26141	-0.258794	-0.130471	0.24719	-0.320788	0.444533	-1.02472	0.246591
-4.564	-0.546839	0.0924301	1.03562	0.521507	0.439461	-0.837397	-0.103613	0.323115	-0.110941	0.161194	-0.291064	0.152555	0.128965	0.170013	0.261188	-0.258905	-0.130256	0.247754	-0.320745	0.444686	-1.02477	0.24638
-4.56352	-0.546727	0.0926326	1.03501	0.521827	0.440225	-0.838388	-0.10353	0.323097	-0.110372	0.161057	-0.29153	0.152073	0.12857	0.170181	0.261264	-0.258646	-0.130034	0.248438	-0.320601	0.444044	-1.02471	0.246068
-4.56304	-0.547005	0.0931611	1.0343	0.521503	0.440711	-0.837908	-0.103654	0.323059	-0.110402	0.161257	-0.291662	0.151717	0.128433	0.170005	0.260125	-0.258449	-0.129657	0.249017	-0.320495	0.444191	-1.02474	0.245223
-4.56256	-0.548083	0.0934267	1.03436	0.521781	0.44103	-0.839371	-0.103491	0.322998	-0.110099	0.161763	-0.291243	0.151073	0.128582	0.169376	0.260182	-0.258516	-0.129735	0.249309	-0.320267	0.443987	-1.02461	0.244958
-4.56208	-0.548373	0.094162	1.03391	0.522005	0.441454	-0.839963	-0.103519	0.32299	-0.110109	0.162454	-0.290401	0.150318	0.128491	0.169705	0.260221	-0.258327	-0.129428	0.249615	-0.320289	0.444044	-1.02396	0.244854
-4.5616	-0.548638	0.0946177	1.03366	0.521885	0.442108	-0.842277	-0.10353	0.32325	-0.110066	0.162585	-0.290185	0.149471	0.128143	0.169931	0.260589	-0.258277	-0.129314	0.249982	-0.320237	0.443802	-1.02374	0.244977
-4.56112	-0.549958	0.0952443	1.03386	0.521854	0.442453	-0.844566	-0.103723	0.323388	-0.110027	0.163421	-0.291057	0.148272	0.128016	0.169953	0.260167	-0.258249	-0.129211	0.25045	-0.31998	0.44362	-1.02409	0.244628
-4.56064	-0.55105	0.0948634	1.03352	0.521652	0.442732	-0.846305	-0.103238	0.323356	-0.110374	0.164193	-0.292157	0.147811	0.127992	0.169675	0.26034	-0.258011	-0.129073	0.251165	-0.319878	0.443336	-1.0244	0.244502
-4.56016	-0.551413	0.0952473	1.03368	0.521399	0.443309	-0.845813	-0.103778	0.323365	-0.110289	0.164828	-0.293994	0.147204	0.127633	0.169326	0.260565	-0.257505	-0.12919	0.251758	-0.319678	0.443317	-1.02418	0.244618
-4.55968	-0.552068	0.0952345	1.03354	0.519797	0.443612	-0.84652	-0.104388	0.323556	-0.110297	0.165394	-0.293719	0.146775	0.127402	0.168944	0.2603	-0.257393	-0.129215	0.252336	-0.319649	0.44313	-1.02417	0.244465
-4.5592	-0.552913	0.0952729	1.03269	0.519269	0.444153	-0.846489	-0.104775	0.323458	-0.109825	0.165937	-0.294776	0.145837	0.126977	0.1687	0.260455	-0.257308	-0.129248	0.252539	-0.319772	0.442898	-1.02366	0.244327
-4.55872	-0.553486	0.0956276	1.03238	0.519222	0.444852	-0.846156	-0.104905	0.323514	-0.110327	0.166579	-0.297277	0.145358	0.126528	0.16876	0.260211	-0.256514	-0.129014	0.253022	-0.319515	0.443035	-1.02408	0.244125
-4.55824	-0.553747	0.0953108	1.03259	0.518158	0.444897	-0.846218	-0.105308	0.323711	-0.110848	0.166874	-0.298915	0.144884	0.126207	0.168546	0.260051	-0.256592	-0.128825	0.253364	-0.319512	0.442775	-1.02418	0.243754
-4.55776	-0.554293	0.0952292	1.03208	0.519117	0.445229	-0.847144	-0.104925	0.323758	-0.110868	0.16688	-0.299841	0.144143	0.126269	0.168542	0.259645	-0.255864	-0.128574	0.253607	-0.319148	0.44259	-1.02451	0.243791
-4.55728	-0.554125	0.0958894	1.03179	0.518343	0.445803	-0.847445	-0.104602	0.323938	-0.111536	0.16714	-0.300556	0.143563	0.126129	0.168228	0.259129	-0.254795	-0.128199	0.253644	-0.318918	0.442152	-1.02461	0.244096
-4.5568	-0.554592	0.0965598	1.03107	0.516776	0.446203	-0.847284	-0.104903	0.323846	-0.110747	0.167574	-0.301768	0.143387	0.125532	0.168255	0.259626	-0.254281	-0.128074	0.254269	-0.31853	0.441875	-1.02526	0.243997
-4.55632	-0.554755	0.0963247	1.03065	0.516703	0.446556	-0.846791	-0.10416	0.323826	-0.109839	0.167911	-0.303469	0.143089	0.125662	0.168062	0.258806	-0.254063	-0.128073	0.254305	-0.318235	0.441827	-1.02508	0.244292
-4.55584	-0.55511	0.0968852	1.03017	0.516448	0.447016	-0.847139	-0.103368	0.323912	-0.110749	0.168825	-0.302159	0.142315	0.12542	0.168049	0.258647	-0.253737	-0.127891	0.254223	-0.317956	0.441561	-1.0247	0.243982
-4.55536	-0.555678	0.0974718	1.03007	0.517112	0.447536	-0.846605	-0.103479	0.323858	-0.110399	0.169539	-0.300827	0.141384	0.125366	0.167994	0.258017	-0.253417	-0.127695	0.254581	-0.318013	0.441513	-1.02454	0.244046
-4.55488	-0.556284	0.0978923	1.0298	0.517132	0.447871	-0.8459	-0.103768	0.323861	-0.110795	0.170059	-0.299745	0.140732	0.12516	0.167869	0.258012	-0.253234	-0.12765	0.254301	-0.31761	0.441373	-1.02454	0.243829
-4.5544	-0.556471	0.0982869	1.03011	0.517412	0.448255	-0.844356	-0.104074	0.323856	-0.110635	0.170896	-0.299573	0.140647	0.125172	0.167156	0.257342	-0.253107	-0.127608	0.254757	-0.317394	0.44098	-1.02454	0.243518
-4.55392	-0.55769	0.0984987	1.02945	0.517961	0.448521	-0.842706	-0.104084	0.32402	-0.109934	0.171591	-0.300463	0.139958	0.124922	0.167234	0.257012	-0.252586	-0.127706	0.254585	-0.317286	0.440443	-1.02428	0.243947
-4.55344	-0.558401	0.0987759	1.02934	0.517107	0.448731	-0.839599	-0.103747	0.324231	-0.109847	0.171954	-0.302194	0.139345	0.124589	0.167262	0.257163	-0.252179	-0.127518	0.254301	-0.316991	0.440349	-1.02432	0.243783
-4.55296	-0.55983	0.0989534	1.02885	0.517894	0.44923	-0.839931	-0.104344	0.324235	-0.109148	0.172664	-0.302504	0.139151	0.12427	0.16755	0.256723	-0.251209	-0.127772	0.254559	-0.316877	0.440798	-1.02458	0.243513
-4.55248	-0.560632	0.0988072	1.02848	0.517703	0.449656	-0.8393	-0.104467	0.32437	-0.10952	0.17307	-0.302225	0.138735	0.123778	0.167743	0.256145	-0.250786	-0.127897	0.254975	-0.316845	0.441108	-1.02478	0.243277
-4.552	-0.561097	0.0988706	1.02868	0.517827	0.449714	-0.838807	-0.104654	0.324522	-0.110113	0.172948	-0.302153	0.137941	0.123506	0.167906	0.255443	-0.249864	-0.127612	0.255057	-0.316647	0.441123	-1.02478	0.243169
-4.55152	-0.561591	0.0991643	1.02868	0.517539	0.450199	-0.83963	-0.104748	0.324673	-0.109987	0.17331	-0.301845	0.137768	0.123717	0.168202	0.254951	-0.248746	-0.127672	0.255431	-0.316534	0.440519	-1.02405	0.243113
-4.55104	-0.563288	0.0997255	1.02898	0.517662	0.450595	-0.839767	-0.105112	0.324521	-0.109395	0.173946	-0.302092	0.137846	0.123518	0.168023	0.255186	-0.248129	-0.127668	0.255249	-0.316375	0.440391	-1.02423	0.243416
-4.55056	-0.56337	0.0999563	1.02938	0.517115	0.450521	-0.839575	-0.105142	0.324434	-0.109414	0.173959	-0.301945	0.13754	0.12354	0.168499	0.255335	-0.24715	-0.127828	0.255491	-0.316075	0.44015	-1.02404	0.243455
-4.55008	-0.563956	0.100049	1.02963	0.516662	0.450882	-0.839561	-0.105016	0.324397	-0.109256	0.174705	-0.302608	0.13681	0.1231	0.16861	0.255388	-0.245993	-0.127926	0.255788	-0.315955	0.440234	-1.02422	0.24383
-4.5496	-0.564525	0.0996837	1.02994	0.516307	0.451387	-0.839885	-0.105416	0.32451	-0.109409	0.174765	-0.30199	0.136976	0.12301	0.168901	0.255571	-0.245106	-0.127912	0.256512	-0.315677	0.439963	-1.02434	0.243619
-4.54912	-0.566348	0.0999375	1.0289	0.51539	0.451511	-0.839558	-0.105857	0.324513	-0.109085	0.175145	-0.302044	0.136693	0.123115	0.168728	0.254753	-0.244598	-0.128091	0.25721	-0.315715	0.439667	-1.02435	0.243609
-4.54864	-0.566533	0.100096	1.02875	0.513729	0.451277	-0.839988	-0.105723	0.324521	-0.10878	0.175533	-0.3028	0.136408	0.122757	0.168944	0.254356	-0.243608	-0.128116	0.257752	-0.315536	0.439344	-1.02413	0.243682
-4.54816	-0.567568	0.100878	1.0287	0.513772	0.45195	-0.839421	-0.105673	0.324495	-0.10857	0.176377	-0.303669	0.136347	0.122492	0.168914	0.254791	-0.242696	-0.128368	0.258048	-0.315358	0.439697	-1.02395	0.243282
-4.54768	-0.566878	0.10136	1.02889	0.513556	0.452561	-0.839236	-0.105981	0.324693	-0.108169	0.176367	-0.303234	0.135829	0.121903	0.169191	0.254972	-0.242198	-0.128447	0.257942	-0.315379	0.440022	-1.02329	0.243328
-4.5472	-0.567834	0.101612	1.02904	0.513179	0.453141	-0.837184	-0.106468	0.324733	-0.107876	0.177134	-0.302608	0.135979	0.121913	0.169376	0.254415	-0.241387	-0.128543	0.258217	-0.315429	0.439956	-1.0225	0.243317
-4.54672	-0.568049	0.102405	1.02901	0.511825	0.453331	-0.836564	-0.106241	0.324797	-0.107615	0.177676	-0.301857	0.135718	0.122019	0.169171	0.254363	-0.240574	-0.128621	0.258239	-0.315233	0.44031	-1.02202	0.243245
-4.54624	-0.567411	0.102777	1.02932	0.51172	0.453809	-0.835483	-0.106612	0.32501	-0.10827	0.178057	-0.301002	0.135296	0.121631	0.169118	0.254084	-0.240755	-0.128708	0.258457	-0.315135	0.440509	-1.0216	0.24291
-4.54576	-0.567193	0.10292	1.03	0.511876	0.454512	-0.835339	-0.106894	0.324859	-0.108145	0.17853	-0.300326	0.135188	0.121711	0.169168	0.253798	-0.240348	-0.12886	0.258959	-0.315261	0.440844	-1.02156	0.242866
-4.54528	-0.567115	0.103082	1.03032	0.512941	0.455088	-0.835815	-0.106875	0.324875	-0.108138	0.179325	-0.299275	0.134554	0.12166	0.168495	0.25376	-0.239337	-0.128928	0.259157	-0.315223	0.440494	-1.02139	0.242747
-4.5448	-0.566848	0.103286	1.03041	0.512885	0.455366	-0.836515	-0.107243	0.325074	-0.107836	0.17945	-0.299551	0.134627	0.121544	0.168116	0.25348	-0.238438	-0.129009	0.25929	-0.315484	0.440163	-1.0216	0.242585
-4.54432	-0.566852	0.103977	1.03138	0.513335	0.455974	-0.83716	-0.106838	0.32488	-0.108915	0.180243	-0.299211	0.134058	0.121619	0.167947	0.253085	-0.238325	-0.129246	0.259191	-0.315358	0.440186	-1.02164	0.242381
-4.54384	-0.566769	0.104204	1.03138	0.51351	0.456501	-0.837842	-0.106935	0.324878	-0.109629	0.18005	-0.29824	0.133702	0.121327	0.167992	0.253266	-0.237798	-0.129119	0.259314	-0.315404	0.440023	-1.02147	0.242348
-4.54336	-0.566657	0.105607	1.03146	0.513343	0.456971	-0.837137	-0.107058	0.325075	-0.110857	0.180588	-0.297476	0.133985	0.12136	0.168597	0.25357	-0.237307	-0.129706	0.259539	-0.315212	0.439818	-1.02118	0.242277
-4.54288	-0.567009	0.106249	1.03159	0.513341	0.457045	-0.836271	-0.106726	0.325225	-0.110803	0.181513	-0.295835	0.133991	0.121441	0.168691	0.252501	-0.237184	-0.129798	0.259618	-0.315121	0.440051	-1.02137	0.241957
-4.5424	-0.566945	0.106679	1.0319	0.513309	0.457125	-0.837349	-0.106385	0.325186	-0.111021	0.181863	-0.295342	0.134091	0.121021	0.168687	0.252034	-0.236646	-0.129961	0.259974	-0.315209	0.439685	-1.02118	0.241733
-4.54192	-0.566966	0.107347	1.03188	0.513894	0.457551	-0.836827	-0.106543	0.325206	-0.110852	0.182492	-0.293969	0.133892	0.120715	0.168509	0.2528	-0.236852	-0.130168	0.260011	-0.315462	0.43953	-1.02118	0.241612
-4.54144	-0.566671	0.107569	1.03191	0.513853	0.457739	-0.838633	-0.106656	0.325297	-0.111021	0.183052	-0.292814	0.132563	0.120884	0.168356	0.252932	-0.23645	-0.130165	0.260235	-0.315475	0.439624	-1.02102	0.241258
-4.54096	-0.566375	0.107639	1.03141	0.514387	0.458114	-0.839165	-0.106643	0.325513	-0.110894	0.183307	-0.291828	0.132174	0.120584	0.167905	0.253326	-0.236159	-0.130096	0.260617	-0.315884	0.440131	-1.02103	0.241219
-4.54048	-0.566396	0.107493	1.03174	0.514935	0.458392	-0.840867	-0.106586	0.325566	-0.111094	0.184198	-0.290132	0.131945	0.120554	0.16795	0.253282	-0.236	-0.130145	0.260878	-0.315961	0.440312	-1.02126	0.241222
-4.54	-0.567098	0.107731	1.03233	0.516075	0.458485	-0.8422	-0.106986	0.325527	-0.111253	0.184824	-0.289205	0.132063	0.120557	0.167617	0.253355	-0.235836	-0.130485	0.261649	-0.31626	0.440056	-1.02145	0.240452
-4.53952	-0.566941	0.107906	1.03215	0.5155	0.459709	-0.843507	-0.107222	0.325675	-0.110856	0.18547	-0.288511	0.131698	0.120949	0.167276	0.253133	-0.235461	-0.13051	0.262017	-0.316505	0.440307	-1.02156	0.240273
-4.53904	-0.566893	0.107928	1.03133	0.516325	0.459942	-0.844577	-0.107608	0.32573	-0.110324	0.186374	-0.288464	0.131547	0.120731	0.167567	0.253729	-0.234967	-0.130645	0.26228	-0.316669	0.440326	-1.02122	0.240508
-4.53856	-0.56734	0.107988	1.03155	0.516367	0.460958	-0.84538	-0.107527	0.325835	-0.111504	0.186851	-0.288796	0.130909	0.12085	0.167286	0.253644	-0.234741	-0.130682	0.262807	-0.316595	0.440568	-1.02082	0.240299
-4.53808	-0.568	0.108255	1.03181	0.515604	0.461811	-0.847127	-0.107801	0.325902	-0.11162	0.187219	-0.288083	0.13151	0.120637	0.16724	0.253248	-0.234183	-0.130899	0.263305	-0.316934	0.440411	-1.02082	0.240002
-4.5376	-0.568784	0.107686	1.03289	0.515922	0.462252	-0.847154	-0.107787	0.3261	-0.111256	0.187925	-0.287444	0.130877	0.1205	0.166977	0.253458	-0.233455	-0.130955	0.263715	-0.317022	0.440739	-1.02091	0.239819
-4.53712	-0.569212	0.108027	1.03306	0.515671	0.463075	-0.847506	-0.10824	0.326279	-0.111014	0.188559	-0.287188	0.130589	0.119963	0.16689	0.253326	-0.233313	-0.13112	0.264484	-0.317013	0.440847	-1.02142	0.2399
-4.53664	-0.569446	0.108789	1.03304	0.515309	0.463685	-0.847671	-0.108225	0.326349	-0.110809	0.188854	-0.286706	0.130684	0.119906	0.167023	0.253266	-0.233344	-0.131163	0.264728	-0.316968	0.44082	-1.0218	0.240115
-4.53616	-0.56959	0.109265	1.03264	0.515365	0.464335	-0.848366	-0.108197	0.326292	-0.110786	0.189083	-0.287265	0.130609	0.119811	0.167294	0.253028	-0.233295	-0.13122	0.265282	-0.317021	0.441108	-1.02196	0.239806
-4.53568	-0.57037	0.109301	1.03267	0.514748	0.464883	-0.848232	-0.108301	0.326544	-0.110412	0.189683	-0.28722	0.130297	0.119755	0.167406	0.253239	-0.232597	-0.131466	0.265562	-0.316887	0.441143	-1.02249	0.239501
-4.5352	-0.57154	0.109287	1.03261	0.514829	0.465089	-0.849326	-0.108564	0.326591	-0.110864	0.189974	-0.287168	0.130407	0.119766	0.167291	0.253217	-0.232205	-0.131476	0.265817	-0.317031	0.441139	-1.02228	0.239541
-4.53472	-0.571556	0.109338	1.03276	0.515197	0.465594	-0.850234	-0.108614	0.326569	-0.11071	0.190306	-0.287648	0.130157	0.11983	0.167465	0.253522	-0.232123	-0.131518	0.265867	-0.317065	0.440953	-1.02192	0.239648
-4.53424	-0.57151	0.109773	1.03302	0.515899	0.466202	-0.850768	-0.108884	0.32657	-0.110224	0.190929	-0.288689	0.130472	0.11989	0.16756	0.253323	-0.231485	-0.131655	0.266512	-0.31697	0.441003	-1.02214	0.239898
-4.53376	-0.571677	0.10971	1.03355	0.515538	0.466893	-0.852029	-0.109407	0.326381	-0.110124	0.190952	-0.287877	0.130087	0.119795	0.167106	0.253231	-0.23148	-0.131784	0.267122	-0.316745	0.440976	-1.02182	0.240097
-4.53328	-0.572224	0.109227	1.03425	0.51462	0.46807	-0.851163	-0.109832	0.326428	-0.109432	0.191482	-0.28778	0.129624	0.119691	0.167245	0.253211	-0.231283	-0.132305	0.267502	-0.316937	0.440711	-1.0222	0.240345
-4.5328	-0.573275	0.10943	1.03458	0.513701	0.468528	-0.850267	-0.10941	0.326633	-0.108757	0.191434	-0.287567	0.129496	0.119551	0.167496	0.253793	-0.231252	-0.13237	0.267672	-0.317056	0.440841	-1.02201	0.240325
-4.53232	-0.574224	0.109726	1.03518	0.513031	0.469064	-0.851939	-0.109877	0.326741	-0.108271	0.19184	-0.286975	0.129077	0.119668	0.167647	0.253977	-0.231515	-0.132263	0.268033	-0.317066	0.440842	-1.02147	0.240463
-4.53184	-0.574471	0.110026	1.03517	0.512652	0.469533	-0.852204	-0.110645	0.326814	-0.106999	0.191587	-0.287777	0.129066	0.119655	0.167885	0.253934	-0.231113	-0.132304	0.268333	-0.317066	0.440783	-1.02154	0.240683
-4.53136	-0.57439	0.109374	1.0352	0.51091	0.469855	-0.85306	-0.110629	0.326923	-0.106626	0.191964	-0.288017	0.129335	0.119584	0.168328	0.253769	-0.231091	-0.132478	0.268701	-0.31676	0.441216	-1.02143	0.241021
-4.53088	-0.574555	0.109569	1.03483	0.511503	0.470091	-0.853677	-0.110773	0.327003	-0.106552	0.192777	-0.288499	0.129591	0.119495	0.168392	0.253776	-0.231013	-0.132757	0.2692	-0.31681	0.441116	-1.02136	0.241374
-4.5304	-0.573794	0.109534	1.03475	0.511299	0.470938	-0.852646	-0.111069	0.327151	-0.106115	0.19318	-0.289156	0.130233	0.119496	0.168563	0.253138	-0.231149	-0.13279	0.269792	-0.316849	0.441296	-1.0213	0.241448
-4.52992	-0.574035	0.110135	1.03444	0.510781	0.471705	-0.853536	-0.111711	0.327402	-0.10592	0.193507	-0.289516	0.130083	0.119684	0.168811	0.253587	-0.230358	-0.13315	0.270134	-0.316958	0.441365	-1.02133	0.241419
-4.52944	-0.57397	0.110678	1.03385	0.510356	0.472183	-0.853805	-0.112014	0.327617	-0.105666	0.193713	-0.290136	0.130016	0.119919	0.168967	0.253275	-0.229365	-0.133253	0.270591	-0.316941	0.440878	-1.02139	0.241394
-4.52896	-0.57458	0.110899	1.03407	0.510782	0.47272	-0.855285	-0.11205	0.327867	-0.105578	0.193625	-0.290096	0.12981	0.120197	0.16848	0.25376	-0.229199	-0.133557	0.271056	-0.316819	0.440754	-1.02106	0.241584
-4.52848	-0.575107	0.11103	1.03401	0.510857	0.473506	-0.855477	-0.111904	0.32804	-0.105306	0.193797	-0.289975	0.12977	0.120271	0.168556	0.253472	-0.229216	-0.133725	0.271196	-0.3169	0.44055	-1.02103	0.241583
-4.528	-0.575484	0.110827	1.03417	0.510777	0.473975	-0.855143	-0.112441	0.328144	-0.105034	0.193877	-0.291126	0.128966	0.120574	0.168409	0.252744	-0.229442	-0.133972	0.271777	-0.316721	0.440507	-1.02051	0.241574
-4.52752	-0.57597	0.11041	1.03488	0.511036	0.475237	-0.854649	-0.112299	0.328377	-0.104827	0.193314	-0.290446	0.128526	0.120665	0.168948	0.252742	-0.228973	-0.134163	0.272313	-0.316443	0.440671	-1.02075	0.241916
-4.52704	-0.575911	0.110037	1.03554	0.512067	0.475782	-0.854555	-0.112172	0.328632	-0.104366	0.193325	-0.290463	0.128529	0.120863	0.168925	0.252856	-0.228739	-0.134712	0.272629	-0.316473	0.440566	-1.02029	0.24203
-4.52656	-0.576158	0.109651	1.03545	0.51085	0.476533	-0.854459	-0.111837	0.3289	-0.104526	0.193516	-0.290304	0.128308	0.120891	0.168731	0.252992	-0.227942	-0.134794	0.272986	-0.316797	0.4406	-1.0199	0.241981
-4.52608	-0.576655	0.109351	1.03537	0.511095	0.477087	-0.854482	-0.112332	0.329084	-0.10432	0.193373	-0.2892	0.128562	0.121298	0.168488	0.252631	-0.227239	-0.135004	0.273475	-0.316692	0.440324	-1.01913	0.242027
-4.5256	-0.576168	0.109019	1.03549	0.510231	0.477563	-0.855409	-0.112813	0.329094	-0.104397	0.193482	-0.289524	0.129091	0.121528	0.168188	0.25278	-0.226474	-0.13496	0.273695	-0.316926	0.440349	-1.0183	0.242322
-4.52512	-0.575576	0.108928	1.03589	0.508896	0.478042	-0.855684	-0.113246	0.329176	-0.103683	0.193538	-0.289305	0.129416	0.121726	0.168231	0.252802	-0.225489	-0.134997	0.274111	-0.316988	0.43987	-1.01767	0.242684
-4.52464	-0.575483	0.108947	1.03644	0.507778	0.47848	-0.856456	-0.113802	0.329437	-0.102932	0.194235	-0.288824	0.129329	0.121705	0.168494	0.252429	-0.225336	-0.135135	0.274291	-0.316999	0.440194	-1.01741	0.242792
-4.52416	-0.576255	0.108628	1.03697	0.506549	0.478942	-0.856954	-0.113918	0.329572	-0.10219	0.194127	-0.288629	0.129083	0.121995	0.168788	0.25211	-0.22422	-0.135424	0.274506	-0.317116	0.440034	-1.01693	0.242923
-4.52368	-0.575572	0.108463	1.03756	0.50526	0.480038	-0.857047	-0.114089	0.329612	-0.10172	0.194011	-0.289043	0.128282	0.122112	0.168714	0.251943	-0.222865	-0.135485	0.274965	-0.317111	0.439816	-1.01636	0.242871
-4.5232	-0.575094	0.107938	1.0377	0.505733	0.480762	-0.855965	-0.114747	0.329609	-0.101089	0.194373	-0.289285	0.128422	0.122478	0.168567	0.251468	-0.222488	-0.135684	0.275465	-0.317097	0.440107	-1.01583	0.24257
-4.52272	-0.574248	0.107601	1.03777	0.505557	0.481685	-0.85613	-0.115172	0.329852	-0.100504	0.19504	-0.289679	0.128029	0.122572	0.168278	0.251448	-0.221902	-0.135908	0.275927	-0.316927	0.44008	-1.01534	0.242839
-4.52224	-0.573408	0.107791	1.03784	0.504006	0.481652	-0.857357	-0.115404	0.329887	-0.099981	0.195623	-0.289789	0.127354	0.122599	0.16838	0.250899	-0.221769	-0.135652	0.276752	-0.316827	0.440146	-1.01488	0.242621
-4.52176	-0.573063	0.107706	1.03762	0.504137	0.48189	-0.857217	-0.115406	0.329961	-0.0996793	0.196104	-0.289433	0.126904	0.122631	0.168219	0.250779	-0.221116	-0.135256	0.277417	-0.317198	0.439735	-1.01461	0.242821
-4.52128	-0.573146	0.107397	1.03845	0.503889	0.482524	-0.858668	-0.11558	0.330133	-0.100008	0.196774	-0.289649	0.126613	0.122817	0.168238	0.251025	-0.220348	-0.13532	0.278026	-0.317304	0.439526	-1.0145	0.242606
-4.5208	-0.573489	0.106645	1.03853	0.503037	0.482863	-0.859201	-0.115472	0.330423	-0.100326	0.196868	-0.289893	0.126222	0.12299	0.168118	0.251237	-0.219828	-0.135367	0.278527	-0.317754	0.439269	-1.01451	0.242629
-4.52032	-0.57276	0.106513	1.0397	0.503429	0.483061	-0.860356	-0.115729	0.330401	-0.100875	0.196321	-0.290547	0.126544	0.123173	0.167846	0.250934	-0.219018	-0.135425	0.279345	-0.318036	0.439081	-1.01459	0.242922
-4.51984	-0.572541	0.106571	1.03942	0.503002	0.483484	-0.861418	-0.115985	0.330436	-0.100478	0.196051	-0.290637	0.125948	0.123698	0.167908	0.250017	-0.218108	-0.135686	0.279604	-0.318371	0.439252	-1.01467	0.242812
-4.51936	-0.572419	0.106762	1.03912	0.502235	0.484147	-0.86212	-0.116386	0.330483	-0.100395	0.195723	-0.290213	0.125295	0.124	0.16777	0.250375	-0.217119	-0.135723	0.280068	-0.318333	0.439443	-1.01464	0.243337
-4.51888	-0.572787	0.10606	1.0394	0.5026	0.484737	-0.863476	-0.11598	0.330704	-0.0999221	0.195778	-0.290977	0.124873	0.124289	0.168211	0.250561	-0.216329	-0.135691	0.280797	-0.318235	0.439049	-1.01433	0.243325
-4.5184	-0.571744	0.1059	1.03917	0.502392	0.485596	-0.864047	-0.116196	0.330712	-0.0993852	0.195689	-0.29085	0.124909	0.124578	0.168933	0.250995	-0.215197	-0.135553	0.280928	-0.31831	0.43865	-1.01409	0.243245
-4.51792	-0.570994	0.106135	1.03907	0.5019	0.486175	-0.865587	-0.116026	0.330647	-0.0991634	0.195849	-0.290741	0.124817	0.124787	0.169615	0.250865	-0.214449	-0.135618	0.28113	-0.31863	0.438472	-1.01426	0.243164
-4.51744	-0.570188	0.105951	1.039	0.502497	0.486664	-0.86656	-0.116261	0.330586	-0.099692	0.196279	-0.290971	0.124784	0.125056	0.169657	0.249995	-0.213755	-0.135554	0.281521	-0.318497	0.438307	-1.01377	0.24293
-4.51696	-0.570114	0.105886	1.03885	0.503227	0.487299	-0.867143	-0.116123	0.330652	-0.0992551	0.196628	-0.290564	0.124739	0.125149	0.169667	0.249508	-0.21263	-0.135223	0.282178	-0.318861	0.437998	-1.01352	0.242854
-4.51648	-0.57015	0.10646	1.03936	0.503433	0.488077	-0.86713	-0.116298	0.331154	-0.0986794	0.196597	-0.290303	0.124572	0.125394	0.170241	0.249396	-0.211888	-0.135056	0.282803	-0.319003	0.43782	-1.01387	0.242922
-4.516	-0.57016	0.106059	1.03932	0.504084	0.488395	-0.867328	-0.116398	0.331198	-0.0980788	0.196291	-0.289848	0.124498	0.125313	0.170373	0.249228	-0.21127	-0.134995	0.283542	-0.319112	0.437772	-1.01408	0.2431
-4.51552	-0.570804	0.106316	1.0399	0.503522	0.488957	-0.86822	-0.117147	0.331169	-0.0976494	0.196158	-0.290131	0.124003	0.125357	0.171114	0.249209	-0.210691	-0.135002	0.283664	-0.31921	0.437622	-1.0137	0.242944
-4.51504	-0.571234	0.106709	1.04029	0.502961	0.489785	-0.868791	-0.117235	0.331373	-0.0975977	0.196062	-0.290163	0.12392	0.125676	0.171617	0.249321	-0.210309	-0.135056	0.284396	-0.319193	0.437497	-1.01401	0.242969
-4.51456	-0.572156	0.107098	1.04034	0.502744	0.49027	-0.869479	-0.116961	0.331573	-0.0970736	0.196185	-0.289735	0.124058	0.12557	0.17214	0.248495	-0.209977	-0.135001	0.285258	-0.319286	0.437028	-1.01397	0.242983
-4.51408	-0.572135	0.107557	1.04162	0.503563	0.49117	-0.870205	-0.116707	0.331886	-0.0965308	0.195921	-0.289134	0.123452	0.12577	0.172071	0.2483	-0.209366	-0.134912	0.28564	-0.319256	0.436821	-1.01427	0.242817
-4.5136	-0.571862	0.107655	1.04178	0.503817	0.492095	-0.870787	-0.116797	0.332157	-0.0957242	0.195502	-0.289216	0.123432	0.125719	0.17211	0.24827	-0.208857	-0.134871	0.285878	-0.31887	0.43689	-1.01419	0.242757
-4.51312	-0.57182	0.108049	1.0414	0.504942	0.492889	-0.871411	-0.116939	0.332266	-0.0953631	0.195249	-0.288824	0.123309	0.125513	0.172189	0.248511	-0.208448	-0.134739	0.286747	-0.318658	0.43681	-1.01421	0.242461
-4.51264	-0.572121	0.108334	1.04181	0.504311	0.493638	-0.872152	-0.116942	0.332317	-0.0946941	0.195239	-0.287905	0.123169	0.125725	0.172422	0.248441	-0.207852	-0.134718	0.287078	-0.318681	0.436702	-1.0146	0.242343
-4.51216	-0.572865	0.108482	1.04225	0.505027	0.494577	-0.872012	-0.116732	0.332525	-0.0935111	0.194755	-0.286815	0.123295	0.125581	0.172578	0.248409	-0.207616	-0.134574	0.287718	-0.31862	0.436609	-1.01472	0.242135
-4.51168	-0.572755	0.108829	1.04232	0.504844	0.494945	-0.87219	-0.117022	0.332563	-0.0922072	0.194305	-0.287058	0.122958	0.125827	0.172853	0.248187	-0.207344	-0.134895	0.288389	-0.318466	0.436829	-1.01523	0.24243
-4.5112	-0.573638	0.109521	1.04304	0.505895	0.495794	-0.872755	-0.11683	0.332667	-0.0912344	0.194238	-0.28612	0.123054	0.125806	0.172935	0.248134	-0.206865	-0.134964	0.288556	-0.318671	0.436634	-1.01479	0.242838
-4.51072	-0.574086	0.110526	1.04307	0.506144	0.496935	-0.873416	-0.116196	0.332961	-0.0906744	0.194182	-0.286471	0.122866	0.126167	0.173274	0.247658	-0.206382	-0.135095	0.288924	-0.318845	0.437004	-1.01532	0.242999
-4.51024	-0.574239	0.111101	1.04333	0.506488	0.497846	-0.873226	-0.116724	0.333076	-0.0898321	0.193939	-0.286569	0.122735	0.126194	0.174042	0.247273	-0.206048	-0.135368	0.289171	-0.319273	0.436775	-1.01516	0.243255
-4.50976	-0.5747	0.111807	1.0437	0.507655	0.498694	-0.873058	-0.116675	0.333196	-0.0895436	0.193846	-0.285716	0.122079	0.126391	0.174042	0.24656	-0.206053	-0.13538	0.289673	-0.319807	0.437056	-1.0151	0.24361
-4.50928	-0.574957	0.112412	1.0442	0.50818	0.499522	-0.873131	-0.11633	0.33338	-0.0887843	0.193499	-0.285297	0.122156	0.12664	0.174193	0.246962	-0.205739	-0.135522	0.289744	-0.320257	0.437427	-1.01493	0.243753
-4.5088	-0.574714	0.113067	1.04392	0.50866	0.500245	-0.873496	-0.116271	0.333746	-0.0883151	0.193049	-0.284932	0.121726	0.126862	0.174885	0.246486	-0.204733	-0.135284	0.29018	-0.320418	0.437673	-1.01501	0.244178
-4.50832	-0.575799	0.113465	1.04446	0.510479	0.500451	-0.873596	-0.116508	0.334003	-0.0877576	0.193211	-0.286487	0.121382	0.126753	0.175288	0.2463	-0.204044	-0.13527	0.290512	-0.320947	0.437819	-1.01556	0.244246
-4.50784	-0.575202	0.113885	1.04452	0.511589	0.501349	-0.874873	-0.116223	0.334157	-0.0879382	0.193469	-0.286189	0.121489	0.126684	0.175358	0.246188	-0.203659	-0.13562	0.291217	-0.321269	0.437976	-1.01567	0.244092
-4.50736	-0.575995	0.114686	1.04505	0.513025	0.502246	-0.875313	-0.115995	0.334323	-0.0867794	0.193185	-0.285632	0.12135	0.126362	0.175309	0.245638	-0.202935	-0.135548	0.291535	-0.321249	0.438238	-1.01557	0.244087
-4.50688	-0.575665	0.114851	1.04579	0.513584	0.503331	-0.876467	-0.116183	0.334428	-0.086068	0.193155	-0.287223	0.121042	0.125827	0.176069	0.246192	-0.20236	-0.135519	0.292165	-0.321247	0.438339	-1.01536	0.244011
-4.5064	-0.575756	0.115787	1.04574	0.515581	0.504195	-0.877739	-0.115891	0.334644	-0.0852925	0.193221	-0.287085	0.120524	0.126141	0.176142	0.245875	-0.201938	-0.135475	0.292411	-0.321445	0.438472	-1.0157	0.244059
-4.50592	-0.575859	0.115947	1.04527	0.515863	0.505432	-0.877258	-0.115619	0.334989	-0.084702	0.193213	-0.286808	0.120684	0.126392	0.176928	0.246257	-0.200885	-0.135519	0.292869	-0.321267	0.438761	-1.01583	0.243786
-4.50544	-0.576451	0.115674	1.04481	0.51579	0.505972	-0.878511	-0.115821	0.3352	-0.0844517	0.193109	-0.287607	0.120245	0.126347	0.177141	0.24608	-0.200147	-0.135406	0.293104	-0.321346	0.438954	-1.01511	0.243776
-4.50496	-0.576389	0.116193	1.04477	0.516703	0.506646	-0.878579	-0.115629	0.335171	-0.0836571	0.193232	-0.287007	0.120494	0.126451	0.177786	0.245876	-0.199128	-0.135556	0.293453	-0.321315	0.439199	-1.01497	0.243866
-4.50448	-0.576142	0.117057	1.04477	0.517015	0.507328	-0.877918	-0.11591	0.335317	-0.082748	0.193182	-0.285498	0.120633	0.12641	0.178327	0.245761	-0.198734	-0.135444	0.293956	-0.321633	0.439188	-1.01504	0.243682
-4.504	-0.576862	0.117622	1.04499	0.517439	0.508578	-0.878358	-0.115964	0.335351	-0.0817144	0.193122	-0.285217	0.120209	0.126442	0.178658	0.245676	-0.19806	-0.135771	0.294202	-0.321838	0.439487	-1.01515	0.24364
-4.50352	-0.577404	0.118296	1.04498	0.517861	0.509573	-0.877589	-0.115961	0.335625	-0.0808763	0.193116	-0.284828	0.119654	0.126882	0.179235	0.246283	-0.196973	-0.135898	0.294658	-0.321748	0.439335	-1.01491	0.244204
-4.50304	-0.577674	0.118131	1.04472	0.518204	0.510093	-0.877369	-0.116111	0.335813	-0.0799124	0.192724	-0.284772	0.119598	0.127456	0.179161	0.24569	-0.196523	-0.136187	0.295181	-0.321371	0.439404	-1.01464	0.244138
-4.50256	-0.57777	0.118295	1.04437	0.519015	0.510518	-0.876652	-0.115572	0.335848	-0.0792364	0.191993	-0.284905	0.119034	0.127617	0.179371	0.245631	-0.195727	-0.136206	0.295499	-0.32137	0.439356	-1.01451	0.243855
-4.50208	-0.578637	0.118565	1.04401	0.519386	0.510792	-0.876783	-0.115494	0.335942	-0.0787617	0.191405	-0.284725	0.118391	0.127735	0.179577	0.245091	-0.194975	-0.136199	0.296078	-0.321143	0.439604	-1.01452	0.243311
-4.5016	-0.578889	0.118742	1.04366	0.518947	0.511611	-0.877058	-0.115492	0.33628	-0.0783402	0.190824	-0.284158	0.117832	0.127696	0.179883	0.245073	-0.194296	-0.136089	0.296318	-0.321076	0.439897	-1.01419	0.243452
-4.50112	-0.579065	0.118882	1.04301	0.51876	0.512486	-0.877145	-0.115309	0.33651	-0.0772819	0.19113	-0.283944	0.117322	0.127859	0.180064	0.244725	-0.193717	-0.135965	0.296264	-0.32109	0.440075	-1.01365	0.24321
-4.50064	-0.579782	0.119132	1.04273	0.519716	0.513218	-0.87788	-0.114737	0.336741	-0.0762955	0.19062	-0.283786	0.117325	0.128256	0.180064	0.244932	-0.193338	-0.136028	0.296657	-0.320862	0.440138	-1.01331	0.242773
-4.50016	-0.580612	0.119227	1.04246	0.520732	0.514102	-0.877496	-0.114766	0.336942	-0.0752071	0.190221	-0.283807	0.117335	0.128734	0.180558	0.244745	-0.192824	-0.135724	0.296714	-0.320852	0.440116	-1.01278	0.242963
-4.49968	-0.580514	0.119548	1.04258	0.521087	0.514899	-0.879725	-0.114204	0.337035	-0.0745803	0.190172	-0.283523	0.116443	0.128929	0.180537	0.244784	-0.192444	-0.135665	0.297162	-0.320804	0.439669	-1.01237	0.242703
-4.4992	-0.581004	0.119629	1.04336	0.521027	0.515602	-0.88067	-0.114501	0.337087	-0.0745392	0.189825	-0.283818	0.116188	0.129314	0.180581	0.244479	-0.19177	-0.135737	0.297498	-0.320895	0.439848	-1.0117	0.242751
-4.49872	-0.580811	0.120328	1.0436	0.521597	0.516986	-0.880823	-0.114315	0.337285	-0.0739386	0.189314	-0.284529	0.1161	0.13001	0.180398	0.243927	-0.190984	-0.135773	0.297434	-0.320448	0.43992	-1.01114	0.242929
-4.49824	-0.580407	0.120421	1.04348	0.523054	0.517979	-0.881429	-0.114181	0.337509	-0.0737118	0.18911	-0.284426	0.11491	0.13063	0.180197	0.244354	-0.190058	-0.13582	0.297771	-0.320435	0.440035	-1.01085	0.242872
-4.49776	-0.579441	0.120292	1.04381	0.523742	0.518683	-0.881512	-0.113952	0.337422	-0.07347	0.188883	-0.284211	0.114494	0.130779	0.179978	0.24417	-0.189432	-0.135814	0.29815	-0.320034	0.439872	-1.01051	0.242689
-4.49728	-0.579737	0.121027	1.04337	0.524809	0.519637	-0.881234	-0.113306	0.337569	-0.0734722	0.189147	-0.284468	0.114295	0.130955	0.1798	0.244093	-0.188498	-0.135983	0.298446	-0.319851	0.439647	-1.00955	0.242544
-4.4968	-0.579578	0.121193	1.04287	0.525572	0.520772	-0.882465	-0.113221	0.337679	-0.0738102	0.188459	-0.285241	0.114173	0.131672	0.179773	0.244393	-0.188358	-0.136028	0.298565	-0.319031	0.439238	-1.00865	0.24285
-4.49632	-0.579438	0.121212	1.04289	0.52615	0.522303	-0.882725	-0.112947	0.33782	-0.0741133	0.188331	-0.28505	0.1138	0.132158	0.180019	0.244203	-0.187486	-0.135952	0.298689	-0.318887	0.439385	-1.00838	0.243034
-4.49584	-0.57956	0.121072	1.04306	0.52605	0.523387	-0.884355	-0.112986	0.337996	-0.0745841	0.188371	-0.284786	0.112868	0.132621	0.17977	0.244351	-0.187637	-0.135751	0.298735	-0.31875	0.439109	-1.00806	0.243465
-4.49536	-0.579728	0.121599	1.04277	0.52612	0.524006	-0.885303	-0.112735	0.337894	-0.0744783	0.188265	-0.285031	0.113533	0.133356	0.18004	0.244267	-0.187143	-0.135787	0.298753	-0.318331	0.43916	-1.00751	0.243423
-4.49488	-0.580406	0.121367	1.04236	0.526537	0.525023	-0.886751	-0.112574	0.338074	-0.0739131	0.188244	-0.28486	0.113213	0.133693	0.180078	0.243923	-0.186693	-0.135712	0.298906	-0.318068	0.438998	-1.00696	0.243443
-4.4944	-0.580233	0.121909	1.04264	0.527174	0.525692	-0.887255	-0.112816	0.337892	-0.0741607	0.187478	-0.285478	0.113316	0.133906	0.180397	0.243657	-0.186579	-0.135711	0.299015	-0.318022	0.438765	-1.00609	0.243025
-4.49392	-0.579855	0.122088	1.04261	0.527414	0.526492	-0.888282	-0.112518	0.337872	-0.0742759	0.187177	-0.28461	0.113146	0.134002	0.180577	0.243138	-0.185269	-0.13587	0.299244	-0.318081	0.438804	-1.00587	0.243201
-4.49344	-0.579753	0.122638	1.04202	0.526428	0.527423	-0.889681	-0.112374	0.338236	-0.075057	0.187378	-0.283776	0.113354	0.133851	0.180439	0.243204	-0.184716	-0.135791	0.299472	-0.317791	0.438942	-1.0057	0.242774
-4.49296	-0.580087	0.122903	1.04202	0.527107	0.528536	-0.890265	-0.112438	0.338358	-0.0750864	0.186844	-0.282812	0.114316	0.13417	0.181221	0.242798	-0.184331	-0.135902	0.299598	-0.317506	0.438602	-1.00495	0.243138
-4.49248	-0.580787	0.123099	1.04233	0.526953	0.529052	-0.890054	-0.11231	0.338577	-0.0744826	0.186532	-0.281817	0.114596	0.134304	0.181794	0.243021	-0.183603	-0.135901	0.299743	-0.317222	0.439128	-1.00452	0.242941
-4.492	-0.581063	0.123666	1.04209	0.527093	0.530057	-0.890646	-0.112261	0.338921	-0.0738251	0.186557	-0.280577	0.114656	0.134546	0.182077	0.243304	-0.183442	-0.13605	0.300057	-0.31719	0.439307	-1.00389	0.242491
-4.49152	-0.580908	0.123394	1.04239	0.526514	0.531018	-0.891839	-0.111805	0.33897	-0.0739933	0.186247	-0.280424	0.114427	0.135271	0.182522	0.243526	-0.182671	-0.13624	0.300166	-0.316874	0.439816	-1.00379	0.242109
-4.49104	-0.580387	0.122747	1.0429	0.52606	0.532196	-0.893009	-0.111863	0.339096	-0.0733909	0.18641	-0.280074	0.114139	0.135308	0.183039	0.243684	-0.182115	-0.136335	0.299765	-0.316958	0.440227	-1.00326	0.241939
-4.49056	-0.58088	0.123108	1.04345	0.525718	0.532904	-0.892878	-0.112009	0.339165	-0.0734041	0.186007	-0.27837	0.114233	0.135427	0.183484	0.244173	-0.181801	-0.136479	0.300054	-0.316818	0.440493	-1.00284	0.242002
-4.49008	-0.580976	0.123218	1.04357	0.525584	0.53403	-0.893215	-0.111892	0.339285	-0.0731318	0.185489	-0.277573	0.114746	0.135556	0.184214	0.244377	-0.181977	-0.136525	0.300436	-0.316536	0.440674	-1.00192	0.242058
-4.4896	-0.581293	0.123661	1.04281	0.526063	0.535324	-0.894087	-0.111956	0.339493	-0.0730579	0.185263	-0.276263	0.11464	0.135572	0.184517	0.244718	-0.181282	-0.136535	0.300551	-0.316449	0.441003	-1.00127	0.241882
-4.48912	-0.581482	0.123208	1.04304	0.527001	0.536575	-0.895176	-0.111594	0.339449	-0.0733267	0.185112	-0.274268	0.115224	0.135506	0.184825	0.245365	-0.180165	-0.136401	0.300313	-0.316331	0.441273	-1.00079	0.241817
-4.48864	-0.581541	0.123383	1.04248	0.527465	0.537517	-0.896165	-0.111143	0.339568	-0.0729896	0.184971	-0.2729	0.115065	0.135507	0.18517	0.245437	-0.180164	-0.136295	0.300383	-0.316058	0.441578	-1.00034	0.241928
-4.48816	-0.581961	0.123484	1.04245	0.527194	0.538553	-0.897078	-0.11127	0.339846	-0.0729014	0.185109	-0.271588	0.114759	0.135331	0.185295	0.245338	-0.179397	-0.13623	0.300712	-0.316175	0.441396	-0.999838	0.241693
-4.48768	-0.581689	0.123978	1.04314	0.526775	0.539941	-0.897692	-0.111186	0.340057	-0.0734696	0.185314	-0.269907	0.114724	0.135378	0.185624	0.245011	-0.179192	-0.136372	0.300816	-0.316353	0.441732	-0.999212	0.2417
-4.4872	-0.581901	0.123846	1.04394	0.526457	0.540931	-0.897355	-0.11112	0.340281	-0.0736316	0.185334	-0.269238	0.114665	0.135396	0.185689	0.245238	-0.178885	-0.136461	0.301046	-0.31629	0.442244	-0.998506	0.241396
-4.48672	-0.582314	0.123127	1.0435	0.52769	0.542275	-0.896493	-0.11135	0.340499	-0.0730549	0.18497	-0.268468	0.114012	0.135343	0.186131	0.244968	-0.178278	-0.136644	0.301009	-0.315873	0.442406	-0.997569	0.241194
-4.48624	-0.58242	0.123299	1.04365	0.528262	0.543312	-0.895826	-0.111335	0.340553	-0.072612	0.184326	-0.267738	0.113746	0.135426	0.186038	0.245451	-0.178113	-0.136733	0.301339	-0.31571	0.442945	-0.996803	0.24127
-4.48576	-0.582242	0.123178	1.0439	0.529191	0.543811	-0.895415	-0.11102	0.340672	-0.0723413	0.184052	-0.266878	0.113985	0.135442	0.186373	0.24453	-0.177719	-0.136616	0.301484	-0.315548	0.443011	-0.996439	0.241556
-4.48528	-0.582759	0.123312	1.04413	0.530081	0.545047	-0.895784	-0.111042	0.340805	-0.0724404	0.184049	-0.266365	0.113816	0.135607	0.186077	0.245292	-0.177747	-0.136375	0.301769	-0.315751	0.442827	-0.994834	0.241895
-4.4848	-0.582919	0.124244	1.04419	0.531504	0.546231	-0.89608	-0.110917	0.340864	-0.0725389	0.184227	-0.266404	0.113124	0.135518	0.185905	0.246648	-0.177613	-0.136667	0.302044	-0.315462	0.443344	-0.994224	0.241933
-4.48432	-0.58338	0.124516	1.04408	0.53217	0.546891	-0.896599	-0.11072	0.340863	-0.072338	0.18383	-0.266585	0.112497	0.135379	0.185922	0.246891	-0.176949	-0.13675	0.302148	-0.31534	0.443497	-0.993437	0.241789
-4.48384	-0.582714	0.124892	1.04378	0.53306	0.54756	-0.897365	-0.110486	0.3408	-0.0718894	0.18337	-0.266297	0.111613	0.13549	0.185915	0.247346	-0.176306	-0.136569	0.302573	-0.315511	0.443753	-0.993063	0.241636
-4.48336	-0.583572	0.124635	1.04432	0.533492	0.548716	-0.897892	-0.110923	0.340948	-0.0714083	0.183081	-0.264953	0.110799	0.135321	0.186067	0.247861	-0.175885	-0.136556	0.302469	-0.315326	0.443694	-0.991959	0.241478
-4.48288	-0.584185	0.124534	1.04401	0.53371	0.54937	-0.897548	-0.110429	0.34112	-0.0719432	0.182703	-0.264361	0.110552	0.135224	0.185514	0.247644	-0.175785	-0.136671	0.302951	-0.315536	0.443657	-0.990856	0.241342
-4.4824	-0.584145	0.124296	1.04362	0.533906	0.550687	-0.897845	-0.110223	0.341123	-0.0719271	0.182955	-0.264137	0.1101	0.135316	0.185041	0.247832	-0.175464	-0.136344	0.3032	-0.315473	0.443848	-0.99001	0.241362
-4.48192	-0.583883	0.125033	1.04339	0.53475	0.551832	-0.897994	-0.109664	0.341128	-0.0713443	0.183208	-0.263814	0.109882	0.13521	0.185071	0.247717	-0.175066	-0.136325	0.303644	-0.315567	0.443895	-0.988551	0.241265
-4.48144	-0.583377	0.124651	1.04389	0.534454	0.552552	-0.895731	-0.109323	0.341314	-0.0712631	0.183351	-0.264017	0.109207	0.135106	0.185157	0.248186	-0.174363	-0.13581	0.303762	-0.316112	0.444082	-0.98808	0.240778
-4.48096	-0.583706	0.124753	1.04322	0.534783	0.553643	-0.89512	-0.10976	0.341473	-0.0713085	0.183015	-0.264321	0.109029	0.13499	0.185555	0.248064	-0.173922	-0.135868	0.304373	-0.315831	0.444451	-0.986998	0.240828
-4.48048	-0.583396	0.124671	1.04272	0.535891	0.554522	-0.895433	-0.109528	0.341426	-0.0709572	0.183253	-0.263391	0.108117	0.135078	0.186092	0.248396	-0.173556	-0.1358	0.304633	-0.31564	0.444823	-0.985436	0.240664
-4.48	-0.583601	0.12459	1.04249	0.536864	0.555534	-0.894362	-0.109866	0.341391	-0.0708212	0.183728	-0.262976	0.10799	0.13511	0.185818	0.249332	-0.172812	-0.135463	0.304596	-0.315428	0.445086	-0.98511	0.240605
-4.47952	-0.583558	0.12451	1.0416	0.537617	0.556187	-0.894325	-0.110121	0.341435	-0.0700906	0.183525	-0.263027	0.107217	0.134958	0.185625	0.249199	-0.172425	-0.13556	0.304764	-0.315195	0.445824	-0.983984	0.240723
-4.47904	-0.583892	0.124251	1.04091	0.539288	0.557195	-0.893357	-0.110168	0.341679	-0.0694142	0.18328	-0.262678	0.106085	0.135	0.18516	0.248594	-0.171694	-0.135531	0.304601	-0.315142	0.446053	-0.983065	0.240595
-4.47856	-0.584377	0.124154	1.04098	0.540873	0.55824	-0.892258	-0.110543	0.341829	-0.068637	0.183015	-0.26156	0.105412	0.135015	0.185024	0.248855	-0.171213	-0.13488	0.304607	-0.315397	0.446396	-0.982702	0.240613
-4.47808	-0.583894	0.124101	1.04044	0.540569	0.559037	-0.89234	-0.1103	0.341963	-0.0684474	0.18267	-0.261028	0.105124	0.135122	0.184709	0.249058	-0.171137	-0.134799	0.304418	-0.315233	0.446497	-0.981446	0.240467
-4.4776	-0.584363	0.12431	1.03987	0.540883	0.559984	-0.890504	-0.110491	0.342125	-0.0675248	0.182773	-0.259403	0.104801	0.134956	0.184274	0.249279	-0.170447	-0.134521	0.304359	-0.315015	0.446767	-0.980647	0.240446
-4.47712	-0.584659	0.12402	1.03922	0.541911	0.560909	-0.888942	-0.110019	0.342049	-0.0669165	0.182958	-0.258703	0.104418	0.134721	0.184403	0.24945	-0.170189	-0.134001	0.304138	-0.315118	0.447028	-0.979983	0.240518
-4.47664	-0.584772	0.124901	1.03887	0.542547	0.561948	-0.887975	-0.109502	0.341969	-0.0666014	0.182659	-0.258255	0.104204	0.134573	0.184069	0.249619	-0.169583	-0.133693	0.303774	-0.315235	0.447131	-0.978868	0.240687
-4.47616	-0.584987	0.125119	1.03822	0.543665	0.561978	-0.88714	-0.109855	0.341918	-0.0663385	0.18295	-0.257939	0.103563	0.13444	0.183845	0.249662	-0.169155	-0.133617	0.303528	-0.315513	0.447236	-0.978083	0.240374
-4.47568	-0.586149	0.124386	1.03782	0.544254	0.562823	-0.886605	-0.110206	0.341749	-0.0657595	0.183051	-0.257	0.10292	0.134192	0.183346	0.24928	-0.16904	-0.133527	0.303258	-0.315562	0.447454	-0.977102	0.240219
-4.4752	-0.585752	0.124623	1.03652	0.544481	0.563099	-0.885837	-0.110047	0.341777	-0.0654904	0.183497	-0.25727	0.102215	0.134051	0.183334	0.248813	-0.168819	-0.133596	0.303488	-0.315519	0.447634	-0.975923	0.24036
-4.47472	-0.585885	0.124724	1.03549	0.545251	0.563658	-0.884924	-0.110038	0.342032	-0.0653524	0.183296	-0.25742	0.101484	0.134103	0.182771	0.248631	-0.168223	-0.133353	0.303468	-0.315607	0.448042	-0.97492	0.240737
-4.47424	-0.585727	0.124514	1.03504	0.545696	0.56387	-0.883921	-0.109452	0.342013	-0.0646326	0.183614	-0.257412	0.10086	0.134223	0.182206	0.249027	-0.167378	-0.133266	0.303077	-0.315347	0.448234	-0.974917	0.240868
-4.47376	-0.586501	0.124848	1.03437	0.545664	0.564674	-0.884263	-0.1095	0.341966	-0.0642572	0.183581	-0.255971	0.100209	0.134098	0.182264	0.249305	-0.167197	-0.133131	0.303014	-0.315455	0.448664	-0.974455	0.240727
-4.47328	-0.586333	0.124723	1.03337	0.546712	0.565801	-0.883861	-0.109202	0.341918	-0.0643576	0.184075	-0.255707	0.0996253	0.134192	0.182135	0.249401	-0.166662	-0.133101	0.302656	-0.315526	0.449215	-0.973361	0.240482
-4.4728	-0.586388	0.124743	1.03374	0.54719	0.566298	-0.883424	-0.109195	0.342036	-0.0639171	0.185061	-0.254688	0.0988671	0.134512	0.182021	0.249241	-0.166184	-0.133187	0.302528	-0.315483	0.44936	-0.972772	0.240479
-4.47232	-0.586832	0.124657	1.03323	0.547375	0.567202	-0.881747	-0.108921	0.342084	-0.0630755	0.184945	-0.254746	0.098888	0.134599	0.182004	0.248161	-0.166031	-0.133022	0.302157	-0.31513	0.449687	-0.971756	0.240683
-4.47184	-0.586693	0.124468	1.03273	0.548029	0.567766	-0.881634	-0.108926	0.341854	-0.0624192	0.184922	-0.25378	0.0987336	0.134621	0.181922	0.248074	-0.165527	-0.132773	0.30204	-0.315394	0.450194	-0.970391	0.240688
-4.47136	-0.586819	0.123817	1.0315	0.548693	0.568178	-0.880908	-0.108412	0.342031	-0.0621945	0.18527	-0.252549	0.098254	0.135019	0.181915	0.247914	-0.165438	-0.132575	0.302109	-0.315451	0.4504	-0.969257	0.240757
-4.47088	-0.58704	0.124242	1.03106	0.548368	0.568838	-0.880907	-0.108075	0.342146	-0.0620526	0.185617	-0.251227	0.0977148	0.135099	0.182485	0.247063	-0.165105	-0.132347	0.302238	-0.315424	0.450642	-0.967755	0.240646
-4.4704	-0.58755	0.124519	1.0304	0.549127	0.569795	-0.879871	-0.108113	0.342179	-0.0616679	0.185623	-0.250347	0.0967066	0.135406	0.182885	0.246044	-0.164774	-0.132	0.302207	-0.315375	0.450726	-0.966801	0.240834
-4.46992	-0.587346	0.124902	1.02977	0.549637	0.570323	-0.879189	-0.107773	0.34212	-0.0610253	0.185661	-0.249431	0.0961548	0.135495	0.182972	0.24568	-0.164483	-0.131579	0.302584	-0.315419	0.451158	-0.966094	0.240715
-4.46944	-0.588013	0.124574	1.02886	0.549255	0.570583	-0.878141	-0.107269	0.342003	-0.0608625	0.185858	-0.248213	0.0953	0.135684	0.182923	0.245127	-0.164285	-0.131416	0.302659	-0.315359	0.451477	-0.965839	0.240843
-4.46896	-0.588235	0.124564	1.02808	0.550706	0.570983	-0.877723	-0.107209	0.341877	-0.0606102	0.185954	-0.247957	0.094818	0.135848	0.183546	0.244671	-0.164598	-0.131135	0.302688	-0.31521	0.451559	-0.964964	0.240833
-4.46848	-0.589229	0.124985	1.02768	0.551837	0.57166	-0.877288	-0.106855	0.342033	-0.0602587	0.185732	-0.248188	0.0940978	0.135724	0.184206	0.244274	-0.165147	-0.130941	0.302728	-0.315144	0.451971	-0.964449	0.241036
-4.468	-0.589347	0.125237	1.02719	0.552863	0.571965	-0.877603	-0.106896	0.342196	-0.0594035	0.185761	-0.247739	0.0939104	0.135909	0.184601	0.244101	-0.165296	-0.130575	0.3026	-0.314886	0.452424	-0.964091	0.241484
-4.46752	-0.589331	0.125617	1.02642	0.553855	0.572689	-0.875082	-0.107007	0.342424	-0.0582953	0.185537	-0.246519	0.0939481	0.135867	0.184648	0.243813	-0.16543	-0.130616	0.302617	-0.315091	0.452777	-0.963259	0.241437
-4.46704	-0.589982	0.126375	1.02639	0.554692	0.572947	-0.874486	-0.106461	0.342247	-0.0577281	0.185109	-0.245665	0.0938642	0.136081	0.185088	0.24297	-0.165455	-0.130556	0.302633	-0.315344	0.453225	-0.963185	0.241496
-4.46656	-0.589982	0.127286	1.02581	0.555452	0.573384	-0.87352	-0.105874	0.342263	-0.0571467	0.185012	-0.244865	0.0939596	0.136192	0.185319	0.241993	-0.165221	-0.130342	0.302848	-0.315367	0.453529	-0.96244	0.241493
-4.46608	-0.590067	0.127044	1.02577	0.555821	0.573983	-0.871298	-0.105763	0.342445	-0.0568872	0.185099	-0.244177	0.0933713	0.136049	0.185433	0.241341	-0.164871	-0.130039	0.303193	-0.315249	0.454065	-0.962298	0.241259
-4.4656	-0.590213	0.126992	1.02538	0.556387	0.574672	-0.871422	-0.105834	0.342297	-0.0565957	0.185268	-0.243748	0.0939221	0.136318	0.185585	0.240645	-0.164557	-0.129836	0.303398	-0.315052	0.454564	-0.96163	0.241187
-4.46512	-0.590949	0.127282	1.02535	0.557113	0.574901	-0.869058	-0.105631	0.342482	-0.0567736	0.185228	-0.242292	0.0940947	0.136953	0.185694	0.240054	-0.164722	-0.129568	0.303783	-0.314967	0.454897	-0.960859	0.241495
-4.46464	-0.592349	0.126758	1.02524	0.558122	0.57553	-0.868319	-0.105686	0.342461	-0.056466	0.18551	-0.241337	0.0942709	0.137121	0.185579	0.239471	-0.164517	-0.129457	0.3041	-0.315134	0.45515	-0.960433	0.24134
-4.46416	-0.593887	0.127426	1.02462	0.56026	0.576078	-0.867125	-0.105523	0.342602	-0.0563164	0.185556	-0.240264	0.094195	0.137393	0.18546	0.23939	-0.164499	-0.129122	0.304348	-0.314844	0.455479	-0.960029	0.241308
-4.46368	-0.59445	0.127833	1.0238	0.561641	0.576473	-0.865726	-0.10514	0.342615	-0.0562604	0.186511	-0.239687	0.0939399	0.137582	0.185819	0.23867	-0.164611	-0.12907	0.304653	-0.314792	0.456156	-0.959344	0.241274
-4.4632	-0.594954	0.128176	1.02333	0.562909	0.576071	-0.865009	-0.104765	0.342693	-0.0565423	0.186431	-0.239752	0.0939242	0.137625	0.186151	0.237788	-0.164479	-0.129164	0.305041	-0.31446	0.456889	-0.959716	0.24124
-4.46272	-0.595211	0.127757	1.02268	0.564407	0.576525	-0.864962	-0.104607	0.342722	-0.0563	0.186151	-0.23918	0.0937656	0.137708	0.1861	0.237477	-0.164923	-0.129214	0.305519	-0.314388	0.457206	-0.958787	0.24113
-4.46224	-0.595242	0.127841	1.02142	0.565683	0.577076	-0.861666	-0.104078	0.342599	-0.0565605	0.186524	-0.239151	0.0933184	0.137707	0.186093	0.236919	-0.164738	-0.129212	0.305595	-0.314217	0.457662	-0.958522	0.241557
-4.46176	-0.595566	0.128199	1.02067	0.565132	0.577622	-0.859171	-0.103996	0.342675	-0.056595	0.186753	-0.238859	0.0932043	0.137873	0.186466	0.235729	-0.164507	-0.129205	0.305572	-0.314274	0.458263	-0.958386	0.241465
-4.46128	-0.595647	0.128337	1.01981	0.56718	0.578032	-0.858999	-0.103883	0.342538	-0.0561219	0.1867	-0.238545	0.0930727	0.138229	0.187137	0.235325	-0.164569	-0.129282	0.305559	-0.314414	0.458607	-0.958448	0.241356
-4.4608	-0.596471	0.128629	1.01938	0.568612	0.57874	-0.857684	-0.103404	0.342792	-0.0567167	0.187154	-0.23843	0.092831	0.138555	0.187153	0.23436	-0.164178	-0.129077	0.305587	-0.314418	0.459128	-0.957876	0.241104
-4.46032	-0.596963	0.12907	1.01879	0.570016	0.57935	-0.854609	-0.102479	0.342898	-0.0560158	0.188036	-0.238007	0.0920073	0.138679	0.18712	0.233775	-0.164651	-0.128895	0.305758	-0.314175	0.459289	-0.957783	0.241233
-4.45984	-0.596811	0.129704	1.01816	0.571069	0.579914	-0.853282	-0.102039	0.342877	-0.0556276	0.188348	-0.236911	0.0919862	0.138908	0.187092	0.233205	-0.164244	-0.128972	0.305971	-0.314013	0.459729	-0.957687	0.241596
-4.45936	-0.596828	0.130109	1.01753	0.572742	0.580591	-0.851374	-0.101841	0.342785	-0.0558985	0.188451	-0.235696	0.0919346	0.138841	0.187138	0.232606	-0.163593	-0.128844	0.305954	-0.314068	0.45968	-0.957252	0.241826
-4.45888	-0.597121	0.130686	1.01658	0.573175	0.580627	-0.849496	-0.101373	0.342526	-0.0552383	0.188787	-0.235366	0.0915947	0.138914	0.187509	0.231472	-0.16325	-0.12887	0.305963	-0.313932	0.459702	-0.956559	0.241792
-4.4584	-0.597569	0.131473	1.01561	0.573548	0.581514	-0.848304	-0.100759	0.34262	-0.0555904	0.18902	-0.235102	0.0907408	0.138996	0.187553	0.230876	-0.163522	-0.128735	0.306408	-0.313897	0.459962	-0.956197	0.241868
-4.45792	-0.597771	0.131963	1.0154	0.574126	0.581744	-0.846841	-0.100515	0.342554	-0.0558564	0.189095	-0.235131	0.0906257	0.138824	0.188049	0.230999	-0.163456	-0.128666	0.306898	-0.313735	0.460036	-0.956028	0.241975
-4.45744	-0.598117	0.133041	1.01502	0.574887	0.582548	-0.846758	-0.099958	0.342607	-0.0550299	0.18937	-0.2355	0.090729	0.13909	0.188549	0.23035	-0.163183	-0.128632	0.30699	-0.313583	0.460407	-0.955293	0.24187
-4.45696	-0.597983	0.133777	1.01467	0.575696	0.583311	-0.845431	-0.0989881	0.342984	-0.054846	0.18928	-0.235726	0.0906973	0.13901	0.188792	0.229697	-0.163117	-0.128479	0.306852	-0.313535	0.460434	-0.95465	0.24224
-4.45648	-0.597996	0.134567	1.01498	0.577627	0.583718	-0.843619	-0.0983743	0.343028	-0.0546063	0.189076	-0.236422	0.0911064	0.139136	0.189224	0.229491	-0.16319	-0.128504	0.306839	-0.313363	0.460821	-0.954018	0.242524
-4.456	-0.598531	0.135291	1.01447	0.58003	0.583892	-0.841635	-0.0975284	0.342826	-0.0543444	0.189167	-0.236202	0.091192	0.13896	0.189222	0.229302	-0.162665	-0.128366	0.306813	-0.3133	0.46116	-0.95404	0.242794
-4.45552	-0.59853	0.135919	1.0149	0.581661	0.584297	-0.840431	-0.0972341	0.342857	-0.0547218	0.189543	-0.236217	0.091516	0.13902	0.189507	0.228828	-0.162566	-0.128399	0.307065	-0.3131	0.461368	-0.953927	0.242786
-4.45504	-0.598588	0.135962	1.01484	0.582633	0.585116	-0.838457	-0.0968446	0.342986	-0.0549358	0.189344	-0.235898	0.0918681	0.138967	0.189641	0.228749	-0.162759	-0.128411	0.307071	-0.312894	0.461149	-0.953535	0.242926
-4.45456	-0.598322	0.136169	1.01463	0.584265	0.585215	-0.836689	-0.0962323	0.343186	-0.0539568	0.189232	-0.235098	0.091247	0.138793	0.189931	0.228513	-0.162331	-0.128528	0.307202	-0.312908	0.461288	-0.953486	0.242627
-4.45408	-0.598311	0.136681	1.01426	0.586034	0.586156	-0.835701	-0.0962641	0.343143	-0.0535086	0.188938	-0.23453	0.0912718	0.138965	0.190029	0.228949	-0.161781	-0.128446	0.307463	-0.312649	0.461279	-0.953318	0.242763
-4.4536	-0.597835	0.137451	1.01388	0.586342	0.587138	-0.833125	-0.0957313	0.343019	-0.0537003	0.189004	-0.234282	0.0911086	0.138807	0.190114	0.228481	-0.161506	-0.128535	0.307399	-0.312726	0.46172	-0.952956	0.243159
-4.45312	-0.597006	0.138267	1.01364	0.58803	0.588582	-0.8328	-0.0956952	0.342947	-0.0536895	0.189321	-0.23354	0.0905425	0.139269	0.190004	0.228577	-0.160719	-0.128494	0.307493	-0.312536	0.461815	-0.952878	0.243199
-4.45264	-0.597052	0.138988	1.0129	0.589367	0.589367	-0.831605	-0.0953753	0.34289	-0.0534422	0.189203	-0.233151	0.090741	0.139286	0.189945	0.228234	-0.160391	-0.128223	0.307465	-0.312219	0.461997	-0.952358	0.243083
-4.45216	-0.597294	0.139053	1.01275	0.590219	0.590129	-0.829561	-0.0950302	0.342851	-0.0542051	0.188711	-0.232573	0.0905671	0.139498	0.189991	0.228001	-0.160591	-0.127858	0.307316	-0.312173	0.462294	-0.952027	0.243339
-4.45168	-0.597684	0.140259	1.01162	0.591229	0.591113	-0.828642	-0.0958002	0.342829	-0.0547612	0.18847	-0.232807	0.0906425	0.139386	0.190197	0.227588	-0.160783	-0.127709	0.307602	-0.312367	0.462607	-0.951467	0.243294
-4.4512	-0.598035	0.141171	1.01152	0.592458	0.592205	-0.828759	-0.0956091	0.34289	-0.0559795	0.188259	-0.232124	0.090443	0.139382	0.190279	0.227631	-0.160761	-0.127529	0.307737	-0.312074	0.463004	-0.95036	0.243573
-4.45072	-0.598642	0.141821	1.01129	0.592964	0.592876	-0.826595	-0.0954324	0.342824	-0.0568165	0.18868	-0.230658	0.0901949	0.139374	0.190088	0.227551	-0.160456	-0.127349	0.307694	-0.311736	0.462861	-0.950503	0.24353
-4.45024	-0.599112	0.142397	1.01127	0.59416	0.592994	-0.825831	-0.0955137	0.342712	-0.0566509	0.188425	-0.229589	0.0895813	0.139591	0.190106	0.227221	-0.160194	-0.127185	0.308056	-0.311558	0.462924	-0.950035	0.243618
-4.44976	-0.599252	0.142697	1.01085	0.594338	0.593769	-0.824362	-0.094262	0.34284	-0.0560789	0.188533	-0.229277	0.0890109	0.139494	0.189599	0.227554	-0.160168	-0.126932	0.308071	-0.311312	0.462897	-0.94949	0.243548
-4.44928	-0.599476	0.143184	1.01086	0.595894	0.594681	-0.823466	-0.0938911	0.342791	-0.0563168	0.188657	-0.22899	0.0888157	0.139567	0.189524	0.2279	-0.160188	-0.126858	0.308223	-0.311063	0.46264	-0.94907	0.243806
-4.4488	-0.599353	0.144267	1.01043	0.597506	0.595372	-0.822563	-0.0935497	0.343028	-0.0562546	0.188873	-0.228715	0.0885787	0.139764	0.189419	0.228113	-0.159515	-0.126754	0.308393	-0.310974	0.462635	-0.948615	0.243731
-4.44832	-0.599994	0.144414	1.01012	0.598713	0.596096	-0.819715	-0.0928772	0.343001	-0.056377	0.189193	-0.228236	0.0892382	0.139491	0.188965	0.227995	-0.159272	-0.126341	0.308277	-0.310836	0.4628	-0.948555	0.243685
-4.44784	-0.599946	0.144637	1.00995	0.599011	0.597307	-0.817582	-0.0927436	0.343258	-0.0558522	0.189333	-0.227181	0.0892123	0.139317	0.188651	0.228118	-0.158857	-0.126283	0.308276	-0.310695	0.462668	-0.948641	0.244024
-4.44736	-0.60005	0.144696	1.00956	0.600529	0.598197	-0.816018	-0.0918349	0.343134	-0.0563575	0.189518	-0.226145	0.0892399	0.139076	0.188583	0.228254	-0.158859	-0.126001	0.308286	-0.310441	0.46248	-0.948221	0.244757
-4.44688	-0.599511	0.145047	1.00897	0.600943	0.598538	-0.814444	-0.0919421	0.343163	-0.0549002	0.18891	-0.225224	0.0889752	0.139161	0.188958	0.228646	-0.158628	-0.125935	0.308004	-0.310552	0.462235	-0.947643	0.245292
-4.4464	-0.599831	0.145107	1.00841	0.601304	0.599245	-0.81247	-0.0917917	0.343165	-0.0544904	0.189106	-0.224374	0.0886947	0.139225	0.189083	0.228626	-0.147778	-0.125983	0.3085	-0.310567	0.462257	-0.947208	0.245411
-4.44592	-0.599971	0.145431	1.0078	0.602503	0.600026	-0.811365	-0.0920769	0.343164	-0.0540825	0.18874	-0.223382	0.0880773	0.139032	0.188722	0.228617	-0.146376	-0.125673	0.308811	-0.310445	0.46205	-0.946572	0.245513
-4.44544	-0.598802	0.145772	1.0076	0.604025	0.600207	-0.810125	-0.0912618	0.343147	-0.0549258	0.188483	-0.223069	0.0881412	0.138882	0.188521	0.228353	-0.143806	-0.125506	0.308926	-0.310244	0.461941	-0.946044	0.24572
-4.44496	-0.598776	0.14579	1.00694	0.604985	0.600451	-0.80934	-0.0911258	0.343004	-0.0553776	0.188338	-0.222122	0.089098	0.138761	0.188702	0.227812	-0.142132	-0.125361	0.309028	-0.310286	0.4623	-0.945799	0.246277
-4.44448	-0.599249	0.1454	1.00661	0.606135	0.600902	-0.80825	-0.0903982	0.342982	-0.0564598	0.188532	-0.220911	0.0891001	0.138891	0.188688	0.228073	-0.139885	-0.125177	0.30915	-0.310057	0.462599	-0.94515	0.246269
-4.444	-0.600337	0.145605	1.00636	0.607612	0.60164	-0.807449	-0.0901489	0.342987	-0.0551601	0.188639	-0.220753	0.0890744	0.139442	0.188687	0.227383	-0.136839	-0.124927	0.308996	-0.309898	0.462703	-0.945157	0.246798
-4.44352	-0.60074	0.145482	1.00613	0.608261	0.602327	-0.80746	-0.0900861	0.343206	-0.0554173	0.188487	-0.220682	0.0894942	0.139806	0.188575	0.227348	-0.13121	-0.124852	0.309511	-0.309648	0.462716	-0.944659	0.247215
-4.44304	-0.60168	0.146135	1.00627	0.608514	0.602988	-0.807368	-0.0898371	0.34306	-0.0547654	0.188363	-0.220492	0.089574	0.139978	0.188667	0.227552	-0.127873	-0.124518	0.30978	-0.309562	0.462959	-0.943813	0.247732
-4.44256	-0.602527	0.146085	1.00597	0.609134	0.603772	-0.80732	-0.0896408	0.343023	-0.0550533	0.187935	-0.22025	0.0901863	0.140272	0.188585	0.227695	-0.126046	-0.124238	0.309979	-0.309429	0.462984	-0.943727	0.248104
-4.44208	-0.602843	0.146475	1.00551	0.610326	0.604465	-0.807199	-0.0890974	0.342918	-0.0554228	0.187888	-0.219968	0.0909531	0.140489	0.188524	0.227395	-0.12352	-0.123773	0.309933	-0.309318	0.462751	-0.943736	0.248381
-4.4416	-0.603139	0.147336	1.00528	0.610684	0.605334	-0.805728	-0.089433	0.342892	-0.0556454	0.187951	-0.220152	0.0911511	0.140989	0.18845	0.227116	-0.121711	-0.123554	0.310135	-0.309139	0.463011	-0.943378	0.249026
-4.44112	-0.603246	0.147721	1.0047	0.612214	0.606453	-0.805539	-0.0894672	0.342933	-0.0558153	0.187774	-0.219585	0.0911801	0.141157	0.188484	0.227532	-0.120384	-0.123356	0.310233	-0.308817	0.463433	-0.942916	0.249579
-4.44064	-0.60351	0.147655	1.00446	0.612243	0.60686	-0.804693	-0.0896524	0.342609	-0.0554448	0.187777	-0.219183	0.092009	0.141062	0.188425	0.22725	-0.118922	-0.122987	0.310372	-0.308572	0.463499	-0.943073	0.249556
-4.44016	-0.602745	0.147586	1.00446	0.613431	0.607171	-0.804392	-0.0895439	0.342429	-0.0564675	0.187625	-0.217836	0.0923394	0.141142	0.188251	0.227129	-0.11689	-0.122454	0.310776	-0.308144	0.463439	-0.942972	0.250413
-4.43968	-0.60274	0.147926	1.00447	0.615083	0.607593	-0.803922	-0.089248	0.342635	-0.0560644	0.1877	-0.216673	0.0919308	0.141212	0.188011	0.22684	-0.116515	-0.12227	0.310883	-0.30802	0.463365	-0.942571	0.250774
-4.4392	-0.602814	0.148421	1.00405	0.615246	0.607815	-0.803193	-0.0892371	0.342606	-0.0556582	0.187808	-0.216935	0.0916572	0.141361	0.188102	0.227168	-0.115716	-0.121934	0.311638	-0.308097	0.463674	-0.942134	0.251105
-4.43872	-0.602649	0.148532	1.00362	0.615884	0.608377	-0.801664	-0.0892506	0.342575	-0.055314	0.187432	-0.215163	0.0919589	0.141659	0.188406	0.227473	-0.114677	-0.121504	0.311958	-0.30819	0.463612	-0.942003	0.251768
-4.43824	-0.603238	0.149181	1.00335	0.615655	0.609003	-0.80041	-0.0892587	0.342681	-0.0557528	0.187603	-0.213354	0.0922311	0.141898	0.188268	0.227705	-0.113441	-0.121142	0.312289	-0.30825	0.464049	-0.942142	0.252157
-4.43776	-0.603715	0.149545	1.00328	0.616436	0.60965	-0.799541	-0.0894731	0.343056	-0.0561368	0.187614	-0.212977	0.0924274	0.14204	0.188428	0.227536	-0.112807	-0.120783	0.312752	-0.307939	0.464195	-0.941839	0.252596
-4.43728	-0.60378	0.150032	1.00302	0.617251	0.611087	-0.797463	-0.0897906	0.343115	-0.0553597	0.188251	-0.212318	0.0924642	0.142165	0.188346	0.227532	-0.110757	-0.120657	0.312808	-0.307778	0.46411	-0.941966	0.25288
-4.4368	-0.603864	0.15019	1.00255	0.617606	0.612203	-0.797496	-0.0893677	0.343309	-0.0554208	0.188418	-0.211833	0.0925169	0.142178	0.188289	0.227773	-0.108004	-0.120469	0.312701	-0.307861	0.464121	-0.941814	0.253781
-4.43632	-0.603943	0.151302	1.00208	0.618063	0.612489	-0.796695	-0.0895419	0.343331	-0.0545347	0.188035	-0.212208	0.0925715	0.142072	0.188385	0.227838	-0.107593	-0.120387	0.312941	-0.307608	0.464338	-0.941635	0.254093
-4.43584	-0.604115	0.151549	1.00168	0.618333	0.613411	-0.794858	-0.0897209	0.343118	-0.0546702	0.187724	-0.211679	0.0929419	0.14195	0.18858	0.227356	-0.106589	-0.119741	0.313022	-0.307293	0.464432	-0.941614	0.254488
-4.43536	-0.603519	0.151874	1.00157	0.618813	0.614037	-0.790972	-0.089288	0.343079	-0.0540559	0.188275	-0.210552	0.0928301	0.142335	0.188234	0.227785	-0.105668	-0.119601	0.313273	-0.307455	0.464489	-0.941349	0.254805
-4.43488	-0.603347	0.151998	1.00204	0.619671	0.615281	-0.788443	-0.0893975	0.342929	-0.0542134	0.188148	-0.210442	0.0922256	0.14233	0.188676	0.228665	-0.103925	-0.119373	0.313251	-0.307535	0.464292	-0.940662	0.255197
-4.4344	-0.603633	0.152109	1.00203	0.618776	0.615761	-0.784853	-0.089149	0.342771	-0.0537592	0.188174	-0.210298	0.0915006	0.142482	0.188989	0.228576	-0.103484	-0.118848	0.313296	-0.307258	0.464425	-0.940518	0.255753
-4.43392	-0.60389	0.152292	1.0018	0.619326	0.615805	-0.783001	-0.0887372	0.342612	-0.0532164	0.188561	-0.210007	0.091231	0.142561	0.189173	0.228482	-0.10164	-0.118604	0.313558	-0.307499	0.464436	-0.940828	0.256368
-4.43344	-0.604541	0.152671	1.00176	0.619214	0.61625	-0.780649	-0.0883843	0.342798	-0.0534404	0.18884	-0.210225	0.0906333	0.142586	0.189709	0.228468	-0.101434	-0.118036	0.313499	-0.307522	0.464578	-0.940478	0.256771
-4.43296	-0.603919	0.152899	1.0015	0.619233	0.616663	-0.778601	-0.0884229	0.342783	-0.0525802	0.18895	-0.209175	0.0902093	0.142689	0.190112	0.228062	-0.101095	-0.117565	0.31404	-0.307522	0.464558	-0.940434	0.257299
-4.43248	-0.604095	0.152972	1.00147	0.620142	0.617428	-0.775554	-0.0883896	0.342733	-0.0520004	0.189348	-0.209171	0.0902154	0.142778	0.190607	0.228245	-0.100203	-0.116949	0.313935	-0.30757	0.464483	-0.940286	0.25786
-4.432	-0.603675	0.152911	1.00127	0.620519	0.618064	-0.77382	-0.0880405	0.342727	-0.0519144	0.18933	-0.2094	0.0899679	0.142793	0.191075	0.228537	-0.0995177	-0.116436	0.313922	-0.307517	0.464772	-0.940123	0.258418
-4.43152	-0.603554	0.152858	1.00093	0.621406	0.618822	-0.771194	-0.0874281	0.342797	-0.0507585	0.189514	-0.209096	0.0898676	0.143068	0.191347	0.228545	-0.0997191	-0.116156	0.314188	-0.307362	0.464867	-0.939883	0.258951
-4.43104	-0.602879	0.15347	1.00103	0.62226	0.619353	-0.769352	-0.0875417	0.342735	-0.0512543	0.189657	-0.20832	0.0893336	0.143311	0.191721	0.228342	-0.0996426	-0.115951	0.314352	-0.307643	0.465314	-0.93923	0.259617
-4.43056	-0.602477	0.153896	1.00133	0.621989	0.620643	-0.767184	-0.0878467	0.342693	-0.0502228	0.189831	-0.207726	0.0891168	0.143494	0.192182	0.228545	-0.099425	-0.115755	0.314701	-0.307661	0.465523	-0.939252	0.260183
-4.43008	-0.602525	0.15399	1.00104	0.622481	0.621328	-0.764258	-0.0870649	0.342611	-0.0496299	0.190057	-0.206719	0.0891228	0.143799	0.1929	0.229028	-0.0989422	-0.115492	0.315195	-0.307843	0.46568	-0.939076	0.260502
-4.4296	-0.602785	0.154595	1.00098	0.622282	0.621374	-0.762355	-0.0865253	0.342586	-0.0492171	0.190132	-0.20653	0.0887301	0.144359	0.193118	0.228549	-0.0983044	-0.115255	0.315386	-0.307871	0.466002	-0.939568	0.260667
-4.42912	-0.603313	0.155057	1.00106	0.622955	0.622275	-0.760176	-0.0860054	0.342406	-0.0487523	0.190377	-0.206854	0.0884786	0.144344	0.193393	0.229373	-0.0982951	-0.114552	0.315792	-0.308011	0.466288	-0.93894	0.261392
-4.42864	-0.60335	0.155292	1.00061	0.622823	0.62273	-0.75753	-0.085734	0.342372	-0.0488893	0.190432	-0.206558	0.0883522	0.144627	0.193274	0.229961	-0.0979115	-0.114405	0.316482	-0.307846	0.466561	-0.938983	0.261864
-4.42816	-0.603483	0.155276	1.0005	0.623504	0.623394	-0.753153	-0.085392	0.342098	-0.0491886	0.190324	-0.206424	0.0874884	0.144866	0.193333	0.229691	-0.0975479	-0.114221	0.316898	-0.308157	0.46661	-0.93891	0.262227
-4.42768	-0.604484	0.155444	1.00072	0.624304	0.6243	-0.750217	-0.0850202	0.342047	-0.0489493	0.190418	-0.205722	0.0875525	0.145472	0.193726	0.230184	-0.09664	-0.114167	0.317306	-0.308062	0.466766	-0.938912	0.262624
-4.4272	-0.605399	0.155719	1.00082	0.624378	0.624875	-0.749281	-0.0844627	0.341975	-0.0481486	0.190566	-0.205736	0.0877383	0.145541	0.19416	0.229766	-0.0961718	-0.114177	0.317557	-0.308246	0.466825	-0.938476	0.263077
-4.42672	-0.606622	0.155864	1.00108	0.626195	0.625698	-0.748082	-0.0840906	0.341888	-0.0476925	0.191354	-0.206087	0.0883672	0.145841	0.194452	0.230048	-0.0951969	-0.113854	0.317685	-0.308515	0.466649	-0.938416	0.263221
-4.42624	-0.606901	0.156395	1.00095	0.625497	0.626639	-0.744375	-0.0836769	0.3418	-0.0475143	0.191499	-0.20588	0.0881011	0.146212	0.194976	0.230345	-0.0944768	-0.113522	0.318271	-0.308684	0.467004	-0.938479	0.26401
-4.42576	-0.607492	0.157	1.00141	0.625508	0.627071	-0.742449	-0.0831717	0.341703	-0.0470844	0.191694	-0.205281	0.0875844	0.14619	0.195001	0.230886	-0.0943811	-0.113625	0.318914	-0.309019	0.467433	-0.938043	0.264505
-4.42528	-0.608411	0.157005	1.00128	0.625536	0.627811	-0.741042	-0.082823	0.341469	-0.0462409	0.191857	-0.204326	0.0875077	0.146562	0.195431	0.230786	-0.0941425	-0.113412	0.319491	-0.309224	0.468172	-0.937692	0.264909
-4.4248	-0.60827	0.157076	1.00137	0.625582	0.62837	-0.738705	-0.08264	0.341295	-0.0455359	0.192305	-0.204744	0.086807	0.146964	0.195394	0.231125	-0.0936242	-0.113481	0.319726	-0.309217	0.468436	-0.937399	0.265295
-4.42432	-0.608877	0.157232	1.00099	0.625436	0.628672	-0.737669	-0.0819942	0.341155	-0.0444936	0.192693	-0.20508	0.0867333	0.147255	0.195507	0.231312	-0.092681	-0.113349	0.320253	-0.309289	0.468656	-0.937269	0.265953
-4.42384	-0.610032	0.157273	1.00077	0.626383	0.629022	-0.735573	-0.0814992	0.341221	-0.0443285	0.192298	-0.204566	0.0858464	0.147419	0.196051	0.231768	-0.0926312	-0.113201	0.320666	-0.309537	0.468864	-0.937059	0.266273
-4.42336	-0.610629	0.157829	1.00035	0.626556	0.62983	-0.733579	-0.0804342	0.341148	-0.044499	0.192537	-0.203966	0.0858907	0.147855	0.196206	0.232354	-0.0921839	-0.113189	0.321198	-0.309616	0.469067	-0.93665	0.266737
-4.42288	-0.610792	0.157931	1.00048	0.626759	0.630584	-0.73192	-0.0797075	0.340967	-0.0446361	0.193198	-0.204205	0.0855162	0.147962	0.1964	0.232987	-0.0920101	-0.113029	0.321911	-0.309562	0.468783	-0.936934	0.267191
-4.4224	-0.611354	0.158403	1.00014	0.626714	0.63173	-0.730177	-0.0787628	0.340819	-0.04409	0.193365	-0.204227	0.0853952	0.148018	0.196435	0.232927	-0.091363	-0.113064	0.322163	-0.3096	0.468749	-0.936926	0.26782
-4.42192	-0.611723	0.158779	0.999825	0.627415	0.632525	-0.72936	-0.0784014	0.340667	-0.0441655	0.193054	-0.204379	0.0849464	0.148369	0.196829	0.232474	-0.0907886	-0.113102	0.322558	-0.309673	0.468664	-0.936585	0.268305
-4.42144	-0.611536	0.158865	0.999682	0.627283	0.632913	-0.727891	-0.0779527	0.340693	-0.0444514	0.193086	-0.204857	0.0841373	0.148701	0.197456	0.232868	-0.0896503	-0.113126	0.323102	-0.309744	0.469328	-0.936167	0.268504
-4.42096	-0.611489	0.159204	0.999132	0.628176	0.633294	-0.726419	-0.0771284	0.340549	-0.0443549	0.193303	-0.205385	0.0836288	0.148933	0.198329	0.233087	-0.0886143	-0.113279	0.323745	-0.309563	0.469602	-0.936071	0.268679
-4.42048	-0.611766	0.159637	0.99806	0.628188	0.633472	-0.724304	-0.0767667	0.340299	-0.0439555	0.193966	-0.205998	0.0835096	0.148683	0.198211	0.233285	-0.0887288	-0.113296	0.32349	-0.309811	0.47004	-0.935621	0.268991
-4.42	-0.611681	0.159239	0.997597	0.628533	0.63371	-0.722768	-0.0764951	0.340437	-0.0441674	0.194384	-0.206079	0.0834536	0.14897	0.198411	0.233429	-0.0880026	-0.113583	0.323597	-0.309734	0.470336	-0.93508	0.269824
-4.41952	-0.612113	0.159083	0.997648	0.627983	0.634334	-0.721335	-0.0762935	0.340365	-0.0440594	0.194317	-0.205268	0.0834055	0.149177	0.199024	0.233189	-0.087834	-0.113697	0.323773	-0.309337	0.47051	-0.934817	0.270401
-4.41904	-0.613004	0.159981	0.99747	0.6277	0.635154	-0.719073	-0.0762024	0.340319	-0.0439044	0.194934	-0.204563	0.0829604	0.14899	0.199297	0.232786	-0.0864486	-0.11377	0.323449	-0.3096	0.470916	-0.934908	0.270865
-4.41856	-0.613066	0.16	0.996855	0.627786	0.635177	-0.717224	-0.0758804	0.340302	-0.0442355	0.19526	-0.204042	0.0828923	0.14918	0.199534	0.23237	-0.0861045	-0.113989	0.323585	-0.309501	0.471055	-0.934765	0.271455
-4.41808	-0.613861	0.159776	0.996453	0.627237	0.635506	-0.714534	-0.0755683	0.340066	-0.0439196	0.19503	-0.203991	0.0827304	0.149226	0.199937	0.232691	-0.0853205	-0.114045	0.323387	-0.309355	0.471194	-0.934219	0.271967
-4.4176	-0.616056	0.15975	0.996464	0.628094	0.636308	-0.712463	-0.0757096	0.340061	-0.0448754	0.195577	-0.203948	0.0828218	0.149397	0.199714	0.233393	-0.0853854	-0.114232	0.323567	-0.30898	0.471525	-0.934064	0.272342
-4.41712	-0.617427	0.159934	0.997125	0.628196	0.636776	-0.710963	-0.0752732	0.339831	-0.0454443	0.195531	-0.204255	0.0823541	0.149368	0.199926	0.233625	-0.0852192	-0.114275	0.323523	-0.308825	0.471834	-0.934556	0.27281
-4.41664	-0.618222	0.16028	0.997475	0.6286	0.637283	-0.709729	-0.075241	0.339928	-0.0459715	0.196249	-0.20479	0.0818016	0.149557	0.199552	0.233853	-0.0851767	-0.11431	0.323546	-0.308404	0.47189	-0.934529	0.273052
-4.41616	-0.618538	0.160272	0.996642	0.62881	0.638307	-0.708074	-0.0752665	0.339551	-0.0475503	0.196901	-0.204631	0.0816358	0.149733	0.199537	0.234303	-0.084785	-0.114241	0.323186	-0.308181	0.472099	-0.934269	0.273285
-4.41568	-0.619249	0.160346	0.996466	0.628839	0.638717	-0.707477	-0.0750012	0.33946	-0.0483404	0.197896	-0.204948	0.0818851	0.149931	0.19971	0.234519	-0.0846593	-0.114586	0.323027	-0.307936	0.472198	-0.934168	0.273032
-4.4152	-0.619178	0.160131	0.995625	0.628985	0.639064	-0.707333	-0.0745221	0.339223	-0.0491913	0.197972	-0.204411	0.0815006	0.149866	0.200161	0.234028	-0.0846574	-0.114553	0.322984	-0.308022	0.472662	-0.934173	0.273324
-4.41472	-0.619707	0.160331	0.995609	0.629059	0.639586	-0.707076	-0.0741089	0.338922	-0.0492328	0.198094	-0.204272	0.0816315	0.149815	0.200078	0.233953	-0.0846071	-0.114911	0.322933	-0.30808	0.473321	-0.933408	0.273558
-4.41424	-0.61956	0.16066	0.995241	0.630272	0.640993	-0.705108	-0.0736174	0.338743	-0.0494967	0.198436	-0.204352	0.0813633	0.149995	0.199999	0.234119	-0.0848293	-0.114877	0.323217	-0.307583	0.473889	-0.933434	0.273817
-4.41376	-0.619102	0.161076	0.995211	0.631002	0.641634	-0.704248	-0.0729651	0.338674	-0.0495163	0.199602	-0.20345	0.0810806	0.150123	0.200252	0.23454	-0.0843462	-0.115195	0.323463	-0.307491	0.474301	-0.933377	0.273958
-4.41328	-0.619877	0.160726	0.995045	0.630725	0.642538	-0.702664	-0.0723021	0.338549	-0.049082	0.199798	-0.202914	0.0810194	0.150092	0.200345	0.234541	-0.0841849	-0.115282	0.323577	-0.307433	0.474484	-0.932706	0.274325
-4.4128	-0.620462	0.160435	0.995378	0.630456	0.643107	-0.701814	-0.0713106	0.338186	-0.0498175	0.199921	-0.203047	0.081018	0.15017	0.201017	0.234934	-0.0840924	-0.115513	0.323381	-0.307176	0.475074	-0.93333	0.274318
-4.41232	-0.6207	0.160429	0.995153	0.630772	0.643249	-0.700639	-0.0705812	0.338042	-0.0497132	0.200304	-0.203401	0.0809663	0.150035	0.200923	0.235316	-0.0837504	-0.115741	0.323345	-0.307273	0.475193	-0.932802	0.27419
-4.41184	-0.620737	0.160983	0.994318	0.630608	0.64342	-0.699569	-0.0698044	0.337892	-0.0496869	0.200424	-0.203317	0.0809606	0.150096	0.201343	0.235101	-0.0834205	-0.115855	0.323491	-0.307012	0.476139	-0.933222	0.274311
-4.41136	-0.621009	0.15987	0.99427	0.630311	0.643966	-0.699869	-0.0693968	0.337511	-0.0501217	0.200595	-0.203268	0.0810331	0.15021	0.201059	0.235196	-0.0828034	-0.116074	0.3239	-0.306997	0.476157	-0.93425	0.274556
-4.41088	-0.620855	0.159541	0.993957	0.62881	0.644284	-0.699373	-0.0690277	0.337082	-0.0505202	0.200933	-0.203781	0.0813325	0.14995	0.201283	0.235427	-0.0831001	-0.116426	0.324034	-0.307103	0.476488	-0.935358	0.274457
-4.4104	-0.621318	0.159711	0.993726	0.627907	0.644664	-0.698256	-0.0685918	0.337129	-0.0516618	0.201252	-0.203444	0.0818312	0.149779	0.201375	0.236029	-0.0831222	-0.116568	0.323834	-0.307194	0.477272	-0.935723	0.274431
-4.40992	-0.621857	0.159324	0.993474	0.627267	0.645405	-0.697588	-0.0691839	0.336972	-0.0519651	0.201448	-0.203752	0.081857	0.149597	0.201922	0.236352	-0.082555	-0.11673	0.323932	-0.307181	0.477477	-0.935942	0.27472
-4.40944	-0.622439	0.158684	0.993363	0.626748	0.646011	-0.69668	-0.0682363	0.336846	-0.0522171	0.201662	-0.204037	0.0823431	0.149329	0.201986	0.237406	-0.0819877	-0.116904	0.323706	-0.307036	0.477965	-0.936682	0.274769
-4.40896	-0.623221	0.158519	0.99364	0.625621	0.64626	-0.697125	-0.0673256	0.336802	-0.0526627	0.202356	-0.204189	0.082759	0.149161	0.201782	0.237339	-0.0810022	-0.117236	0.323735	-0.307062	0.478344	-0.937238	0.274646
-4.40848	-0.623883	0.157716	0.993272	0.62579	0.647369	-0.696486	-0.0669257	0.336938	-0.053467	0.2023	-0.204226	0.082056	0.149415	0.201941	0.237317	-0.0804974	-0.11731	0.323805	-0.307223	0.479088	-0.937884	0.274892
-4.408	-0.624025	0.157519	0.993149	0.625951	0.648202	-0.695029	-0.0664653	0.336767	-0.0537784	0.202678	-0.2041	0.081869	0.149289	0.201908	0.237198	-0.0792775	-0.117376	0.324001	-0.307163	0.479226	-0.938012	0.275158
-4.40752	-0.624855	0.157286	0.993032	0.624765	0.648736	-0.694869	-0.0657755	0.336664	-0.0534874	0.203137	-0.204776	0.0820536	0.14903	0.202383	0.236962	-0.0794293	-0.117492	0.323875	-0.306822	0.480103	-0.938449	0.275372
-4.40704	-0.624744	0.157435	0.993582	0.624459	0.648801	-0.694392	-0.0656292	0.336478	-0.0540292	0.203098	-0.204686	0.0820673	0.149173	0.202494	0.237189	-0.0783701	-0.117652	0.323894	-0.306689	0.480727	-0.938762	0.27577
-4.40656	-0.626292	0.157431	0.993459	0.62528	0.649428	-0.6944	-0.0657604	0.33646	-0.0539751	0.203289	-0.204694	0.0818756	0.149372	0.203061	0.237319	-0.0779903	-0.117855	0.323865	-0.30648	0.481374	-0.938811	0.275661
-4.40608	-0.626283	0.15674	0.992995	0.623727	0.650442	-0.694216	-0.0651481	0.336514	-0.0543201	0.203486	-0.204609	0.0812047	0.149386	0.203155	0.237902	-0.0775762	-0.117857	0.323498	-0.30629	0.481877	-0.938473	0.275995
-4.4056	-0.626193	0.156441	0.993395	0.623494	0.650924	-0.693046	-0.0652089	0.336484	-0.0539214	0.204406	-0.205351	0.0810796	0.149455	0.203474	0.238083	-0.0775183	-0.118147	0.323732	-0.306421	0.482234	-0.938931	0.275886
-4.40512	-0.626583	0.156208	0.993695	0.624074	0.651541	-0.692243	-0.0644588	0.336453	-0.0543143	0.204837	-0.206277	0.0813392	0.149407	0.203648	0.238115	-0.0774	-0.11836	0.323306	-0.306435	0.482515	-0.939316	0.276034
-4.40464	-0.626688	0.155914	0.994195	0.623655	0.651718	-0.690748	-0.0640341	0.336397	-0.0544598	0.20555	-0.206667	0.0815317	0.149357	0.203721	0.23812	-0.077929	-0.118677	0.3233	-0.306026	0.482501	-0.939655	0.276124
-4.40416	-0.627413	0.156109	0.994218	0.623573	0.652672	-0.690596	-0.0635247	0.336238	-0.0543525	0.205564	-0.207177	0.0817973	0.149523	0.203972	0.23842	-0.0775623	-0.118693	0.323221	-0.30614	0.482619	-0.939784	0.276355
-4.40368	-0.627592	0.155195	0.994587	0.623608	0.653376	-0.688784	-0.0634523	0.335959	-0.0534812	0.205811	-0.207643	0.0816305	0.149705	0.204193	0.238756	-0.0770106	-0.11909	0.323439	-0.306158	0.483268	-0.93957	0.276339
-4.4032	-0.626998	0.154714	0.99478	0.623338	0.653673	-0.688781	-0.0625048	0.335891	-0.0532862	0.205822	-0.207363	0.0819442	0.149976	0.204615	0.239022	-0.076372	-0.119124	0.32377	-0.306146	0.48409	-0.940045	0.276305
-4.40272	-0.627165	0.154843	0.994508	0.623116	0.654254	-0.688751	-0.0623529	0.335495	-0.052841	0.205899	-0.20903	0.0828813	0.149972	0.20469	0.239627	-0.0759944	-0.118952	0.323958	-0.306323	0.484402	-0.939997	0.276336
-4.40224	-0.627183	0.155084	0.994443	0.62274	0.655246	-0.687512	-0.0620566	0.335128	-0.0525221	0.205724	-0.209481	0.0830763	0.149597	0.204695	0.239979	-0.0758562	-0.118753	0.324128	-0.306446	0.484987	-0.940476	0.276202
-4.40176	-0.627521	0.154911	0.994163	0.622522	0.655343	-0.687132	-0.0618911	0.334982	-0.0523038	0.206167	-0.209513	0.0831985	0.149515	0.204561	0.240811	-0.075532	-0.118737	0.324362	-0.306339	0.485582	-0.940378	0.276443
-4.40128	-0.628031	0.15501	0.994761	0.621833	0.655632	-0.686643	-0.0617242	0.335151	-0.0526787	0.206381	-0.208862	0.0830243	0.149429	0.204827	0.241513	-0.0755636	-0.118686	0.324318	-0.306496	0.486312	-0.940362	0.27646
-4.4008	-0.628674	0.154871	0.995555	0.620678	0.656201	-0.685759	-0.061903	0.335138	-0.0519964	0.206975	-0.208245	0.083247	0.149639	0.205306	0.241704	-0.0756072	-0.11864	0.324467	-0.306536	0.48695	-0.939718	0.276485
-4.40032	-0.628906	0.154976	0.996155	0.620456	0.656604	-0.685358	-0.0609936	0.335274	-0.0522939	0.207189	-0.207967	0.0832338	0.149758	0.205651	0.241859	-0.0758096	-0.118645	0.324671	-0.30641	0.487395	-0.93978	0.276854
-4.39984	-0.629005	0.155027	0.996104	0.620761	0.657098	-0.685462	-0.0604846	0.33552	-0.051818	0.207666	-0.20878	0.0838261	0.149888	0.206204	0.242551	-0.076449	-0.118485	0.324858	-0.306494	0.487989	-0.939533	0.277431
-4.39936	-0.629708	0.154751	0.996688	0.620424	0.658007	-0.684278	-0.0600959	0.335452	-0.0515183	0.208199	-0.209281	0.0841568	0.149946	0.206601	0.243562	-0.0758077	-0.118798	0.324669	-0.306505	0.48859	-0.939202	0.277497
-4.39888	-0.630007	0.154821	0.997128	0.620619	0.658429	-0.682868	-0.0596812	0.3356	-0.0514299	0.208651	-0.209002	0.083831	0.149872	0.206783	0.244275	-0.0753715	-0.118744	0.324938	-0.306609	0.488862	-0.93942	0.277359
-4.3984	-0.63074	0.154982	0.998117	0.621909	0.659088	-0.683081	-0.0599976	0.335752	-0.0507068	0.208576	-0.208902	0.0845589	0.150139	0.206953	0.24459	-0.0754759	-0.118839	0.325236	-0.306552	0.488911	-0.939607	0.277633
-4.39792	-0.631195	0.154737	0.998156	0.622477	0.659772	-0.682186	-0.0598584	0.335758	-0.0497076	0.208824	-0.209229	0.0846201	0.149955	0.206844	0.244881	-0.0752622	-0.11882	0.325429	-0.306407	0.488935	-0.93955	0.277726
-4.39744	-0.631803	0.1544	0.998295	0.621816	0.660347	-0.682532	-0.0602089	0.335506	-0.0494978	0.208969	-0.20956	0.0847366	0.14954	0.207243	0.244797	-0.0753525	-0.118793	0.325396	-0.306374	0.489277	-0.93963	0.278033
-4.39696	-0.631993	0.154466	0.99791	0.621353	0.660814	-0.683049	-0.0599501	0.335468	-0.0487499	0.208518	-0.210093	0.0846529	0.149229	0.206904	0.245316	-0.0740748	-0.118535	0.325702	-0.30592	0.489595	-0.939413	0.277913
-4.39648	-0.63233	0.154668	0.998056	0.621424	0.66131	-0.684249	-0.0601377	0.335458	-0.0486325	0.208712	-0.209932	0.0845558	0.148912	0.206748	0.245725	-0.0739287	-0.118322	0.325857	-0.306144	0.490198	-0.939137	0.278063
-4.396	-0.633022	0.154611	0.99781	0.62108	0.661447	-0.684019	-0.0589715	0.335429	-0.048317	0.208995	-0.209721	0.0846171	0.148558	0.206728	0.24586	-0.0735742	-0.117912	0.325996	-0.306245	0.490871	-0.938451	0.278487
-4.39552	-0.632851	0.154743	0.997275	0.62012	0.661519	-0.684338	-0.0581989	0.335436	-0.0483238	0.209196	-0.209465	0.0851511	0.148908	0.207088	0.246193	-0.072463	-0.117932	0.326194	-0.306347	0.491241	-0.93838	0.278455
-4.39504	-0.633989	0.154769	0.997327	0.619466	0.661726	-0.683421	-0.0576012	0.33523	-0.0480089	0.209179	-0.209677	0.085427	0.149225	0.207127	0.246367	-0.0721758	-0.117735	0.326233	-0.306514	0.491368	-0.938457	0.27849
-4.39456	-0.633467	0.155276	0.997627	0.619273	0.662576	-0.682884	-0.0575218	0.335329	-0.047728	0.209337	-0.209335	0.0857906	0.148815	0.207483	0.246667	-0.0720057	-0.117788	0.326471	-0.306777	0.492125	-0.938245	0.278665
-4.39408	-0.633586	0.156031	0.997607	0.619223	0.663331	-0.683781	-0.0569172	0.335298	-0.0472493	0.209816	-0.20887	0.0857226	0.148553	0.207386	0.246858	-0.0720215	-0.117605	0.326807	-0.307123	0.492617	-0.937869	0.278353
-4.3936	-0.633056	0.156688	0.997241	0.620351	0.663821	-0.682219	-0.0564621	0.335582	-0.0464102	0.209799	-0.209165	0.0859744	0.148574	0.207731	0.246855	-0.0704155	-0.117542	0.326848	-0.307294	0.493057	-0.937772	0.278537
-4.39312	-0.633285	0.156921	0.996605	0.620743	0.664917	-0.681326	-0.0564886	0.335517	-0.046565	0.21043	-0.209445	0.085692	0.148076	0.207997	0.247374	-0.0692939	-0.117612	0.327482	-0.307237	0.49328	-0.937921	0.278299
-4.39264	-0.633233	0.157156	0.997221	0.620528	0.665323	-0.680435	-0.0565284	0.33564	-0.0458839	0.210872	-0.208765	0.0856658	0.147842	0.207973	0.247849	-0.0691639	-0.117593	0.327849	-0.30743	0.493418	-0.93669	0.278333
-4.39216	-0.633719	0.157208	0.996684	0.620499	0.665878	-0.680001	-0.0561231	0.335694	-0.0456142	0.211089	-0.208286	0.0861292	0.147937	0.207783	0.248672	-0.0684219	-0.117789	0.32781	-0.307362	0.493779	-0.936422	0.278435
-4.39168	-0.634244	0.157163	0.996988	0.619598	0.666746	-0.680177	-0.0557521	0.335672	-0.0456265	0.211416	-0.207586	0.0860523	0.147897	0.208001	0.249281	-0.068079	-0.117692	0.327863	-0.307549	0.493958	-0.936141	0.278339
-4.3912	-0.634098	0.156537	0.99703	0.620723	0.666893	-0.68023	-0.0552855	0.335703	-0.045092	0.211622	-0.206063	0.0861024	0.147852	0.207733	0.250002	-0.0675369	-0.117465	0.328125	-0.307331	0.494164	-0.93561	0.277897
-4.39072	-0.633923	0.156418	0.997406	0.619839	0.667463	-0.679708	-0.0542751	0.335811	-0.0449316	0.212128	-0.204995	0.0866439	0.147901	0.207423	0.250039	-0.0674073	-0.117337	0.328471	-0.307475	0.494586	-0.93527	0.277658
-4.39024	-0.63414	0.156915	0.996629	0.619547	0.667798	-0.680097	-0.0539301	0.335921	-0.0450281	0.212137	-0.204368	0.0863284	0.147785	0.207799	0.250234	-0.0673012	-0.117342	0.328778	-0.307739	0.494693	-0.935039	0.277685
-4.38976	-0.635115	0.157647	0.996534	0.619673	0.668459	-0.680265	-0.0540665	0.335917	-0.0450265	0.213091	-0.204102	0.0863215	0.147887	0.207912	0.250918	-0.0662915	-0.117021	0.32891	-0.307712	0.494741	-0.935391	0.277618
-4.38928	-0.635812	0.158196	0.99626	0.619234	0.669473	-0.679215	-0.0534993	0.335971	-0.0447123	0.213434	-0.202448	0.0861083	0.14789	0.208111	0.25166	-0.0661891	-0.117112	0.328948	-0.307886	0.494971	-0.935547	0.277385
-4.3888	-0.636146	0.158686	0.996654	0.618899	0.670309	-0.679085	-0.0536748	0.336122	-0.0442307	0.213835	-0.201419	0.0861647	0.148074	0.208208	0.251708	-0.0661496	-0.117131	0.32928	-0.307764	0.49536	-0.934725	0.276942
-4.38832	-0.636713	0.158749	0.997606	0.619158	0.670647	-0.678195	-0.0542778	0.336195	-0.0447033	0.214178	-0.200092	0.0860991	0.148045	0.208191	0.252378	-0.065288	-0.117336	0.329724	-0.307816	0.495415	-0.934551	0.276722
-4.38784	-0.637143	0.158824	0.998249	0.618721	0.671282	-0.67836	-0.0544062	0.33633	-0.0447499	0.214802	-0.198908	0.0859587	0.148024	0.208242	0.252554	-0.0650752	-0.117511	0.329683	-0.307829	0.495301	-0.934628	0.276651
-4.38736	-0.638352	0.158869	0.998352	0.617975	0.672119	-0.677936	-0.0542819	0.336255	-0.0446212	0.215636	-0.198641	0.0868455	0.14811	0.208269	0.252943	-0.0650116	-0.117243	0.329807	-0.30839	0.495804	-0.934433	0.276231
-4.38688	-0.638337	0.159083	0.998301	0.615947	0.672853	-0.677375	-0.0544455	0.336136	-0.0438697	0.215988	-0.198226	0.0870368	0.148227	0.208491	0.253385	-0.0651532	-0.117389	0.33023	-0.308277	0.495684	-0.934148	0.276153
-4.3864	-0.639253	0.15967	0.999143	0.6171	0.673203	-0.677581	-0.0536383	0.33608	-0.0433705	0.216245	-0.197664	0.087545	0.14833	0.208776	0.25368	-0.0648693	-0.117392	0.330203	-0.308602	0.495853	-0.933866	0.276148
-4.38592	-0.639875	0.160139	0.998977	0.617631	0.673294	-0.676668	-0.0532981	0.336002	-0.0431615	0.216968	-0.196823	0.0883407	0.148379	0.209431	0.253751	-0.0644205	-0.117519	0.330083	-0.308442	0.496165	-0.933785	0.276202
-4.38544	-0.639833	0.160879	0.998834	0.61671	0.674154	-0.675708	-0.0528207	0.336167	-0.0426883	0.217429	-0.196984	0.0884447	0.148746	0.209644	0.25337	-0.0643474	-0.117816	0.330221	-0.308494	0.495867	-0.933194	0.276063
-4.38496	-0.639915	0.161761	0.998847	0.615497	0.674381	-0.674921	-0.0526185	0.336136	-0.0429877	0.218047	-0.19641	0.0892607	0.148979	0.210175	0.253125	-0.0639206	-0.117862	0.330201	-0.307902	0.496041	-0.933427	0.276195
-4.38448	-0.640293	0.162364	0.999497	0.614878	0.674827	-0.675333	-0.0521248	0.336048	-0.0425298	0.219211	-0.19624	0.089312	0.148979	0.210725	0.253605	-0.0641912	-0.117942	0.330468	-0.308046	0.49553	-0.933299	0.275787
-4.384	-0.640486	0.162171	0.999831	0.614361	0.675846	-0.67577	-0.0517362	0.336084	-0.0421819	0.219994	-0.19451	0.0897744	0.148867	0.210452	0.253402	-0.0644744	-0.117943	0.330583	-0.308096	0.495456	-0.933545	0.275768
-4.38352	-0.640075	0.162636	0.999936	0.613937	0.676438	-0.677038	-0.0515358	0.336018	-0.0419772	0.220199	-0.194054	0.090272	0.148903	0.210797	0.252989	-0.0638659	-0.118132	0.33083	-0.308592	0.495193	-0.933687	0.275472
-4.38304	-0.639876	0.162688	0.999767	0.61278	0.677549	-0.679021	-0.0512724	0.335825	-0.0419688	0.22076	-0.192973	0.0904654	0.148978	0.211139	0.252936	-0.0636774	-0.11824	0.330829	-0.30846	0.494768	-0.933594	0.27534
-4.38256	-0.639929	0.162737	0.999884	0.613283	0.678338	-0.679821	-0.0509019	0.3359	-0.0421341	0.220867	-0.192359	0.0904795	0.14866	0.211348	0.253104	-0.0637975	-0.118368	0.330584	-0.308611	0.494709	-0.933527	0.274999
-4.38208	-0.639959	0.162997	0.999969	0.61222	0.679119	-0.680464	-0.0509103	0.33577	-0.0430376	0.221427	-0.192147	0.0908714	0.148766	0.211362	0.253108	-0.0641565	-0.118142	0.330785	-0.308786	0.494676	-0.933237	0.275115
-4.3816	-0.639383	0.163042	1.00036	0.611178	0.679208	-0.682117	-0.0505058	0.335638	-0.0436592	0.221825	-0.191534	0.0919807	0.148656	0.21129	0.252917	-0.063729	-0.1181	0.331115	-0.309045	0.494516	-0.933079	0.275376
-4.38112	-0.639369	0.163852	1.00088	0.611179	0.680135	-0.682054	-0.050185	0.335728	-0.0437113	0.221778	-0.191325	0.092442	0.14843	0.211461	0.252924	-0.0635509	-0.118306	0.331202	-0.309398	0.494792	-0.932701	0.275091
-4.38064	-0.639472	0.164273	1.00079	0.609868	0.680746	-0.683885	-0.0501678	0.335704	-0.0433848	0.222115	-0.191154	0.0926146	0.148088	0.211771	0.252521	-0.0631733	-0.118541	0.331381	-0.309311	0.494693	-0.933402	0.274882
-4.38016	-0.639325	0.164022	1.00106	0.610074	0.680726	-0.684059	-0.049932	0.335531	-0.0436442	0.222265	-0.190642	0.0923177	0.14808	0.211626	0.252594	-0.0635063	-0.118549	0.331834	-0.309114	0.494402	-0.932911	0.274489
-4.37968	-0.639379	0.164183	1.00161	0.610441	0.681161	-0.685169	-0.0490495	0.335673	-0.0437084	0.222898	-0.191112	0.0928036	0.148242	0.211081	0.25262	-0.0639692	-0.118753	0.332006	-0.309172	0.494514	-0.933354	0.274364
-4.3792	-0.639373	0.164159	1.00195	0.609923	0.681815	-0.684892	-0.0495583	0.335873	-0.0437989	0.223452	-0.191084	0.0928386	0.148165	0.210887	0.252323	-0.0638032	-0.118617	0.33207	-0.309235	0.494387	-0.933345	0.274303
-4.37872	-0.640168	0.163902	1.00306	0.60989	0.682531	-0.685472	-0.0489821	0.335988	-0.0440592	0.224146	-0.190499	0.0934705	0.148219	0.210892	0.252236	-0.0637311	-0.118599	0.332307	-0.309456	0.494397	-0.933566	0.274243
-4.37824	-0.639425	0.164093	1.0036	0.609569	0.682679	-0.685968	-0.0489581	0.33576	-0.0431439	0.224525	-0.190682	0.0945426	0.147911	0.210919	0.252397	-0.0639496	-0.118616	0.332552	-0.309313	0.494249	-0.933804	0.274442
-4.37776	-0.638735	0.164063	1.00413	0.609475	0.683241	-0.687206	-0.0487849	0.335877	-0.0432603	0.224968	-0.191104	0.0950346	0.147708	0.210885	0.251731	-0.0631275	-0.118703	0.33287	-0.309449	0.494116	-0.934049	0.274038
-4.37728	-0.63829	0.164601	1.0054	0.608397	0.683568	-0.688695	-0.0476095	0.335816	-0.0435359	0.225608	-0.191559	0.0955818	0.147491	0.210897	0.250751	-0.0627917	-0.118899	0.333067	-0.309591	0.493913	-0.934634	0.273548
-4.3768	-0.638044	0.164328	1.00518	0.607978	0.684737	-0.689922	-0.0478356	0.336054	-0.0434736	0.225513	-0.191677	0.0967521	0.147063	0.210933	0.249968	-0.0615256	-0.118697	0.333269	-0.309495	0.493626	-0.935168	0.273632
-4.37632	-0.638121	0.16479	1.00573	0.608119	0.685067	-0.690288	-0.0468438	0.336336	-0.0434227	0.225641	-0.191863	0.0971201	0.146963	0.210966	0.249626	-0.0611723	-0.118976	0.33312	-0.309882	0.49393	-0.935446	0.273616
-4.37584	-0.638537	0.16509	1.00626	0.608403	0.685404	-0.691302	-0.0461704	0.336508	-0.044151	0.226033	-0.192972	0.0969997	0.146979	0.210743	0.249719	-0.0615179	-0.118876	0.333366	-0.310129	0.493674	-0.936008	0.273661
-4.37536	-0.638169	0.165601	1.00725	0.608472	0.686329	-0.693072	-0.0457236	0.336706	-0.043567	0.226208	-0.192056	0.0971421	0.146832	0.210462	0.250167	-0.0612291	-0.118889	0.333175	-0.310255	0.493431	-0.936859	0.273526
-4.37488	-0.637731	0.166685	1.00778	0.60884	0.686807	-0.695276	-0.0457155	0.336619	-0.0433263	0.225821	-0.191876	0.0974136	0.146528	0.210529	0.250231	-0.0604009	-0.118952	0.333234	-0.310264	0.493155	-0.936811	0.273688
-4.3744	-0.636694	0.167319	1.00797	0.609922	0.68751	-0.694978	-0.0452358	0.33666	-0.0434162	0.226643	-0.191406	0.0977769	0.146302	0.210286	0.250452	-0.0594589	-0.119053	0.333216	-0.310344	0.493172	-0.937593	0.273555
-4.37392	-0.636302	0.167533	1.0076	0.610842	0.687859	-0.697431	-0.0445863	0.336843	-0.0434271	0.227208	-0.191236	0.0988479	0.146175	0.209616	0.251025	-0.0587261	-0.119272	0.333641	-0.3105	0.493221	-0.937377	0.273275
-4.37344	-0.636321	0.167876	1.00798	0.612411	0.68882	-0.698422	-0.0440612	0.336912	-0.0442524	0.227731	-0.191486	0.0994047	0.145924	0.209601	0.25138	-0.0576184	-0.119414	0.333771	-0.310053	0.493196	-0.936738	0.272923
-4.37296	-0.636682	0.168138	1.00805	0.612661	0.689301	-0.699513	-0.0432122	0.337092	-0.0437832	0.227953	-0.190697	0.100547	0.145594	0.209592	0.251151	-0.0574425	-0.119281	0.333759	-0.310473	0.493009	-0.936978	0.272879
-4.37248	-0.637012	0.168579	1.00854	0.61199	0.690522	-0.699704	-0.0430876	0.336946	-0.0434446	0.228078	-0.190336	0.101366	0.145519	0.2096	0.251493	-0.0561813	-0.119467	0.333626	-0.31036	0.492979	-0.937476	0.272917
-4.372	-0.636002	0.169272	1.0089	0.613214	0.690745	-0.701474	-0.0424863	0.337016	-0.0439208	0.228822	-0.189694	0.101372	0.145358	0.209143	0.251175	-0.0562277	-0.119506	0.333808	-0.310339	0.492986	-0.937341	0.272616
-4.37152	-0.636174	0.169931	1.00882	0.613878	0.691487	-0.702391	-0.0421035	0.337294	-0.0439104	0.229697	-0.189522	0.101864	0.145381	0.209019	0.250973	-0.0551799	-0.119626	0.333995	-0.310328	0.492976	-0.938394	0.272478
-4.37104	-0.635668	0.170429	1.0085	0.614123	0.692158	-0.703269	-0.042505	0.337505	-0.0436466	0.22996	-0.189062	0.102726	0.145281	0.20858	0.251338	-0.0549033	-0.119619	0.334068	-0.310457	0.492749	-0.938787	0.272228
-4.37056	-0.635121	0.170794	1.0085	0.614446	0.692349	-0.704071	-0.0420198	0.337462	-0.0437289	0.230076	-0.189464	0.1035	0.145175	0.208866	0.250581	-0.0543037	-0.119698	0.33399	-0.310464	0.492666	-0.939279	0.271921
-4.37008	-0.634868	0.171117	1.00847	0.615247	0.693051	-0.704702	-0.0411477	0.337423	-0.0440497	0.229787	-0.189972	0.103694	0.145364	0.208544	0.250244	-0.0542242	-0.119614	0.33425	-0.310164	0.492476	-0.938871	0.271718
-4.3696	-0.634354	0.171411	1.00825	0.615141	0.693627	-0.70692	-0.0407107	0.337373	-0.044011	0.229829	-0.189757	0.104052	0.145674	0.208483	0.249299	-0.0536114	-0.119474	0.334294	-0.310424	0.492449	-0.939654	0.271339
-4.36912	-0.634262	0.172251	1.00792	0.614383	0.694151	-0.708183	-0.0403468	0.337475	-0.0446265	0.230139	-0.189187	0.105054	0.145506	0.208455	0.248834	-0.0523298	-0.119341	0.334052	-0.310515	0.49286	-0.939812	0.271301
-4.36864	-0.634456	0.172686	1.0082	0.613037	0.694613	-0.709268	-0.0401422	0.337696	-0.0439046	0.230777	-0.189126	0.105525	0.1453	0.208121	0.248846	-0.0521563	-0.119349	0.334167	-0.310823	0.493188	-0.939967	0.270945
-4.36816	-0.633875	0.172684	1.00821	0.612557	0.694781	-0.70963	-0.0399181	0.337908	-0.0451775	0.231014	-0.18974	0.105929	0.145243	0.207651	0.248553	-0.0515758	-0.119271	0.334438	-0.310884	0.492659	-0.940416	0.27067
-4.36768	-0.634055	0.172533	1.00823	0.611401	0.695311	-0.710428	-0.0395525	0.337854	-0.0451285	0.231319	-0.189945	0.106611	0.145011	0.207572	0.248347	-0.0515433	-0.119222	0.334333	-0.311018	0.492755	-0.940687	0.270355
-4.3672	-0.633561	0.172679	1.00752	0.610618	0.69586	-0.713125	-0.0394728	0.338091	-0.0456526	0.231139	-0.189729	0.106941	0.144895	0.206907	0.248506	-0.0511691	-0.119221	0.334326	-0.311302	0.492645	-0.941131	0.27068
-4.36672	-0.633353	0.17308	1.00759	0.610351	0.696235	-0.714992	-0.0392971	0.338165	-0.046495	0.230978	-0.189502	0.107686	0.144947	0.206889	0.24847	-0.0505182	-0.119445	0.334467	-0.311474	0.49306	-0.941743	0.270642
-4.36624	-0.632961	0.174197	1.00737	0.609395	0.696865	-0.716259	-0.0381705	0.338252	-0.0465088	0.231252	-0.189408	0.108027	0.145084	0.206949	0.24904	-0.0494122	-0.119332	0.334532	-0.311729	0.493487	-0.941993	0.270268
-4.36576	-0.632161	0.174092	1.00681	0.60795	0.69733	-0.717866	-0.0377192	0.338409	-0.0471226	0.232237	-0.189152	0.108279	0.144896	0.206617	0.249187	-0.0493042	-0.119272	0.334474	-0.311585	0.492906	-0.942913	0.269937
-4.36528	-0.631977	0.174035	1.00672	0.606528	0.698843	-0.719112	-0.0376642	0.338533	-0.0472114	0.23275	-0.18857	0.108308	0.145343	0.206491	0.248809	-0.0494546	-0.119462	0.334589	-0.311517	0.492654	-0.94334	0.269301
-4.3648	-0.631447	0.174501	1.00588	0.607271	0.699446	-0.720978	-0.0369187	0.338573	-0.0474363	0.233527	-0.188766	0.108796	0.145179	0.206959	0.249194	-0.0496319	-0.119456	0.334474	-0.311437	0.492583	-0.943224	0.269358
-4.36432	-0.630798	0.174894	1.00562	0.607821	0.699965	-0.72214	-0.0363507	0.338719	-0.0475187	0.23411	-0.189096	0.109366	0.145156	0.206979	0.24913	-0.0490925	-0.119363	0.334246	-0.310986	0.492681	-0.943761	0.268916
-4.36384	-0.630693	0.17534	1.00545	0.608339	0.700642	-0.72336	-0.0363742	0.338986	-0.048073	0.234285	-0.189441	0.110007	0.145373	0.206909	0.249066	-0.0484385	-0.119474	0.333963	-0.31104	0.493009	-0.944951	0.26827
-4.36336	-0.630094	0.175324	1.0051	0.607873	0.701031	-0.72513	-0.0358501	0.33916	-0.048018	0.234203	-0.189904	0.109992	0.14522	0.207377	0.248564	-0.0477891	-0.119118	0.333952	-0.311107	0.492524	-0.945397	0.26807
-4.36288	-0.629563	0.175732	1.00481	0.607023	0.702408	-0.726244	-0.0350304	0.339172	-0.0487864	0.234915	-0.190716	0.11092	0.145187	0.207941	0.248563	-0.0478979	-0.119328	0.333555	-0.311126	0.492247	-0.945078	0.268035
-4.3624	-0.629463	0.175436	1.00453	0.605029	0.703266	-0.727285	-0.0350484	0.339179	-0.0495153	0.235621	-0.190696	0.111484	0.145246	0.20803	0.248165	-0.0475588	-0.119321	0.333641	-0.311129	0.492217	-0.944843	0.267924
-4.36192	-0.628833	0.175455	1.00439	0.604086	0.70472	-0.726931	-0.0347804	0.339556	-0.0490657	0.236185	-0.189971	0.111549	0.14548	0.207855	0.248447	-0.0470184	-0.11937	0.3336	-0.310964	0.491918	-0.945626	0.267961
-4.36144	-0.628669	0.175818	1.00435	0.604518	0.705783	-0.727134	-0.0344075	0.339402	-0.0492997	0.236527	-0.190141	0.111953	0.14554	0.208097	0.248339	-0.0470561	-0.119429	0.333832	-0.310906	0.492098	-0.945948	0.268061
-4.36096	-0.62792	0.176167	1.00476	0.603863	0.706771	-0.727747	-0.0342412	0.339687	-0.0492954	0.237094	-0.189868	0.112213	0.145634	0.208075	0.248829	-0.0463528	-0.119582	0.333774	-0.310886	0.492022	-0.946234	0.267894
-4.36048	-0.627509	0.17634	1.00369	0.603236	0.707068	-0.728046	-0.0338142	0.339806	-0.0495628	0.237239	-0.190146	0.112503	0.145857	0.208104	0.24906	-0.0457472	-0.119478	0.333287	-0.310646	0.492067	-0.946787	0.267784
-4.36	-0.628249	0.176707	1.00336	0.602731	0.707695	-0.728333	-0.0332188	0.340019	-0.0494111	0.23779	-0.189946	0.112989	0.145863	0.208172	0.248894	-0.0456713	-0.119511	0.332856	-0.310596	0.491499	-0.947066	0.267744
-4.35952	-0.628397	0.176884	1.00329	0.601026	0.708087	-0.728951	-0.0322838	0.340059	-0.0485805	0.239003	-0.190946	0.113293	0.145956	0.208139	0.248951	-0.0456517	-0.119441	0.33276	-0.310541	0.491304	-0.948211	0.267669
-4.35904	-0.628702	0.177456	1.00264	0.599934	0.709054	-0.72898	-0.0314171	0.340254	-0.048788	0.238739	-0.191373	0.113556	0.14605	0.208281	0.248951	-0.0448825	-0.119288	0.332814	-0.310459	0.491688	-0.948557	0.26772
-4.35856	-0.628252	0.178227	1.00254	0.599023	0.71067	-0.729397	-0.0307879	0.340443	-0.0487662	0.239355	-0.192673	0.114221	0.146054	0.208045	0.249058	-0.0443113	-0.119365	0.333007	-0.310364	0.491869	-0.9487	0.267767
-4.35808	-0.627704	0.178807	1.00206	0.597693	0.711936	-0.730429	-0.0299144	0.340493	-0.0483834	0.239722	-0.193583	0.114786	0.146277	0.20806	0.248791	-0.04376	-0.119561	0.332942	-0.310443	0.491861	-0.948776	0.267709
-4.3576	-0.627741	0.179595	1.00152	0.596235	0.713208	-0.730668	-0.0292989	0.340512	-0.0483427	0.239781	-0.193269	0.115239	0.146329	0.2079	0.248883	-0.0425473	-0.119582	0.333111	-0.310094	0.492125	-0.949194	0.267964
-4.35712	-0.627859	0.180154	1.00111	0.595543	0.714525	-0.731826	-0.028717	0.340576	-0.0482843	0.240015	-0.193215	0.116163	0.146058	0.208025	0.249108	-0.0421743	-0.119723	0.333361	-0.310078	0.492267	-0.948762	0.267704
-4.35664	-0.62702	0.180903	1.00052	0.594294	0.71578	-0.732678	-0.0277814	0.340604	-0.0480558	0.24009	-0.19362	0.116044	0.146301	0.207766	0.248582	-0.0410253	-0.119682	0.333609	-0.310009	0.492236	-0.949285	0.267615
-4.35616	-0.626622	0.18151	0.999947	0.594127	0.716427	-0.733963	-0.0273206	0.34066	-0.0476161	0.240345	-0.194414	0.116335	0.146563	0.207248	0.248898	-0.0400667	-0.119975	0.333939	-0.309749	0.492189	-0.948949	0.26739
-4.35568	-0.626565	0.181609	0.99989	0.594091	0.717622	-0.734669	-0.0270708	0.340744	-0.0474726	0.241267	-0.19451	0.115938	0.146719	0.207222	0.248569	-0.0391415	-0.119934	0.334266	-0.309578	0.491634	-0.949032	0.267691
-4.3552	-0.626199	0.18115	0.999018	0.593546	0.718643	-0.734933	-0.0263554	0.340863	-0.0474089	0.2415	-0.193498	0.116033	0.146846	0.207137	0.248251	-0.0384978	-0.120174	0.334515	-0.309251	0.491888	-0.949256	0.267643
-4.35472	-0.626231	0.181312	0.998384	0.592005	0.720192	-0.735166	-0.0259952	0.34099	-0.0474208	0.242172	-0.194945	0.116477	0.147119	0.207082	0.248025	-0.0376472	-0.120279	0.334596	-0.309326	0.491437	-0.949352	0.267429
-4.35424	-0.626374	0.181744	0.997985	0.590216	0.721317	-0.735834	-0.0259417	0.341093	-0.0468418	0.242801	-0.195008	0.116432	0.147191	0.207504	0.24791	-0.0371218	-0.120377	0.334783	-0.309069	0.490698	-0.949327	0.267355
-4.35376	-0.625791	0.181865	0.997567	0.588612	0.722821	-0.738208	-0.0256979	0.341004	-0.0462762	0.242568	-0.19517	0.116481	0.147349	0.20775	0.247492	-0.0368728	-0.120386	0.334895	-0.309289	0.490465	-0.949559	0.267081
-4.35328	-0.624691	0.181605	0.99684	0.587491	0.72391	-0.739605	-0.0259569	0.341124	-0.0453576	0.24342	-0.195082	0.116435	0.147138	0.208307	0.247562	-0.0358281	-0.120405	0.334875	-0.309187	0.490312	-0.949943	0.266752
-4.3528	-0.623866	0.182071	0.996966	0.586177	0.725368	-0.74055	-0.0260916	0.341172	-0.045241	0.243932	-0.195223	0.116099	0.146974	0.207935	0.247563	-0.035744	-0.120579	0.334885	-0.309356	0.489721	-0.950611	0.266661
-4.35232	-0.623707	0.1821	0.996344	0.584672	0.727115	-0.741947	-0.0255698	0.341052	-0.0445449	0.243894	-0.195386	0.11651	0.147266	0.207745	0.247873	-0.0354013	-0.120777	0.334955	-0.30922	0.489826	-0.950777	0.266441
-4.35184	-0.623272	0.182435	0.996108	0.582717	0.728106	-0.743093	-0.0256729	0.340828	-0.0443669	0.244067	-0.195712	0.116386	0.147271	0.207401	0.247682	-0.0349026	-0.121088	0.3351	-0.30912	0.489963	-0.950788	0.266588
-4.35136	-0.622691	0.182882	0.996151	0.581428	0.729481	-0.744201	-0.0256041	0.340847	-0.0450286	0.24428	-0.196552	0.11641	0.147044	0.207287	0.247924	-0.0344749	-0.121133	0.335239	-0.309373	0.489631	-0.951305	0.266619
-4.35088	-0.621424	0.183742	0.995988	0.58155	0.730817	-0.74487	-0.0248108	0.340689	-0.0462758	0.244788	-0.196429	0.116417	0.14725	0.207599	0.247694	-0.0343667	-0.121563	0.335439	-0.309521	0.489307	-0.951708	0.266312
-4.3504	-0.620993	0.184398	0.995379	0.579922	0.731919	-0.74627	-0.0247116	0.340545	-0.0465565	0.245117	-0.196437	0.116884	0.147315	0.207293	0.247759	-0.0343413	-0.121502	0.335475	-0.309662	0.489378	-0.951831	0.266011
-4.34992	-0.619372	0.184641	0.994832	0.579727	0.73314	-0.747595	-0.0245837	0.34057	-0.0469497	0.245477	-0.197261	0.11721	0.147297	0.207751	0.247223	-0.0340057	-0.121601	0.335555	-0.309709	0.48868	-0.951873	0.266326
-4.34944	-0.618566	0.185086	0.995022	0.579276	0.734648	-0.748796	-0.0235385	0.340693	-0.0463435	0.245867	-0.198374	0.117557	0.147131	0.207441	0.246522	-0.0337043	-0.121639	0.335751	-0.309699	0.488466	-0.951617	0.266042
-4.34896	-0.617376	0.185444	0.994579	0.578494	0.735824	-0.749417	-0.0231421	0.340482	-0.0466301	0.245853	-0.197874	0.117576	0.147205	0.207582	0.246278	-0.0323519	-0.121578	0.335621	-0.309707	0.488388	-0.951823	0.265786
-4.34848	-0.616441	0.185513	0.994286	0.578788	0.737082	-0.749839	-0.0227328	0.340523	-0.0463766	0.246438	-0.199065	0.117946	0.147197	0.207445	0.245621	-0.0319363	-0.121305	0.335987	-0.309582	0.48834	-0.952579	0.26589
-4.348	-0.616068	0.18584	0.993168	0.577458	0.738339	-0.750931	-0.0223792	0.340586	-0.0470149	0.24647	-0.201542	0.118237	0.147143	0.207242	0.244745	-0.0310174	-0.121196	0.33668	-0.309638	0.48825	-0.953261	0.26618
-4.34752	-0.615548	0.186553	0.992974	0.57753	0.739262	-0.751831	-0.0221669	0.340503	-0.0475158	0.246609	-0.201763	0.119167	0.147418	0.207275	0.244663	-0.0304022	-0.121262	0.336582	-0.309663	0.488177	-0.952796	0.266512
-4.34704	-0.614832	0.186746	0.992528	0.576125	0.740448	-0.752502	-0.0217903	0.340487	-0.0471859	0.247128	-0.202827	0.119569	0.147296	0.206761	0.244107	-0.0296808	-0.121404	0.336889	-0.309599	0.488338	-0.953316	0.266877
-4.34656	-0.614535	0.186753	0.991738	0.574043	0.741397	-0.752258	-0.0219821	0.340493	-0.0469062	0.248083	-0.202971	0.119842	0.147305	0.206462	0.244025	-0.0290174	-0.121314	0.337188	-0.309623	0.488703	-0.953331	0.267061
-4.34608	-0.613225	0.186829	0.991616	0.573433	0.741616	-0.751502	-0.0212732	0.340184	-0.0471119	0.24826	-0.202701	0.120134	0.147271	0.206247	0.244446	-0.0287529	-0.121265	0.337401	-0.309598	0.488934	-0.953809	0.267246
-4.3456	-0.612197	0.187412	0.991545	0.573503	0.742863	-0.751137	-0.0207568	0.340141	-0.0470884	0.248629	-0.202234	0.120987	0.147123	0.205966	0.244833	-0.0278414	-0.121282	0.337367	-0.30966	0.488504	-0.953928	0.267135
-4.34512	-0.611307	0.187632	0.991793	0.573591	0.743904	-0.752028	-0.0205646	0.339984	-0.0464649	0.248564	-0.201811	0.12145	0.147381	0.205658	0.244957	-0.0274836	-0.120942	0.337569	-0.309643	0.488322	-0.953896	0.267043
-4.34464	-0.611703	0.187291	0.991554	0.573606	0.744912	-0.750994	-0.0208593	0.339946	-0.046374	0.248838	-0.201887	0.122308	0.147175	0.205186	0.244855	-0.0270118	-0.120837	0.337635	-0.309801	0.488497	-0.95367	0.267318
-4.34416	-0.611345	0.187619	0.991277	0.573501	0.745732	-0.751155	-0.0207787	0.339876	-0.046336	0.249027	-0.202412	0.122411	0.147023	0.205048	0.244424	-0.0261998	-0.120691	0.337866	-0.309609	0.48842	-0.954454	0.267672
-4.34368	-0.612025	0.188163	0.9913	0.57262	0.746503	-0.751685	-0.0207689	0.339742	-0.0462556	0.249435	-0.201869	0.122499	0.146804	0.205327	0.244704	-0.0262806	-0.120535	0.33809	-0.309432	0.488408	-0.954428	0.267161
-4.3432	-0.61174	0.188905	0.991411	0.57235	0.747127	-0.751647	-0.0210006	0.339733	-0.0457174	0.24973	-0.202097	0.122904	0.1467	0.205115	0.245095	-0.0258082	-0.120457	0.338142	-0.30957	0.488385	-0.954432	0.266804
-4.34272	-0.611671	0.189016	0.991101	0.571253	0.74791	-0.751809	-0.0210735	0.339709	-0.0457174	0.249892	-0.201764	0.12292	0.146581	0.205036	0.245205	-0.0255349	-0.120275	0.338625	-0.309476	0.488287	-0.95431	0.266536
-4.34224	-0.610616	0.189214	0.990959	0.570421	0.748738	-0.752004	-0.0212758	0.339699	-0.045823	0.249828	-0.201583	0.123282	0.146754	0.204874	0.245382	-0.0252098	-0.120309	0.339065	-0.309672	0.487949	-0.95479	0.266476
-4.34176	-0.611334	0.188861	0.990717	0.569181	0.749522	-0.753348	-0.020655	0.339461	-0.0461893	0.249897	-0.201249	0.123481	0.147119	0.204663	0.245616	-0.0245241	-0.119965	0.339374	-0.309277	0.487647	-0.954752	0.266376
-4.34128	-0.610849	0.188356	0.989908	0.568234	0.750669	-0.753475	-0.0206932	0.339388	-0.0451185	0.249955	-0.201329	0.12382	0.147072	0.204673	0.245844	-0.0241274	-0.119975	0.339725	-0.309218	0.487553	-0.955243	0.266078
-4.3408	-0.609529	0.188411	0.990078	0.567683	0.751754	-0.754695	-0.0207182	0.339187	-0.0452018	0.249291	-0.200302	0.123356	0.147035	0.204599	0.246017	-0.0230997	-0.119998	0.340214	-0.309345	0.487306	-0.954357	0.266111
-4.34032	-0.608353	0.188678	0.989434	0.565318	0.752467	-0.753991	-0.0208098	0.339072	-0.0449561	0.249468	-0.199008	0.122917	0.146917	0.204497	0.245503	-0.0230316	-0.120067	0.340383	-0.309155	0.487083	-0.954692	0.265927
-4.33984	-0.607236	0.188701	0.988653	0.564964	0.753554	-0.754137	-0.020625	0.339029	-0.0447781	0.249508	-0.19882	0.12363	0.146965	0.2043	0.245511	-0.0224941	-0.120049	0.340796	-0.309315	0.486792	-0.954193	0.26596
-4.33936	-0.606731	0.188685	0.989239	0.563129	0.754796	-0.754852	-0.0202845	0.338818	-0.0443572	0.249522	-0.198449	0.123588	0.147023	0.204089	0.246359	-0.0219248	-0.120202	0.341102	-0.309336	0.486662	-0.954472	0.265842
-4.33888	-0.606092	0.188996	0.989563	0.561248	0.75614	-0.754392	-0.0205076	0.338679	-0.044552	0.249428	-0.198462	0.123825	0.146797	0.203509	0.246188	-0.0219116	-0.120264	0.341548	-0.3092	0.486388	-0.954849	0.265425
-4.3384	-0.605701	0.189137	0.989979	0.560504	0.757411	-0.752955	-0.0205321	0.338556	-0.0438764	0.249024	-0.198128	0.12421	0.146506	0.203461	0.246264	-0.02194	-0.120543	0.341789	-0.309301	0.486127	-0.954383	0.265608
-4.33792	-0.605839	0.188728	0.989629	0.560417	0.758753	-0.753619	-0.0209483	0.338194	-0.0444619	0.249602	-0.198249	0.124703	0.1461	0.203639	0.245394	-0.0220837	-0.120714	0.342227	-0.309014	0.485833	-0.95445	0.26545
-4.33744	-0.605465	0.18839	0.98893	0.559964	0.759828	-0.754444	-0.0203482	0.337997	-0.0436036	0.250133	-0.198471	0.124968	0.145718	0.203526	0.245161	-0.0217715	-0.120744	0.34259	-0.30886	0.485662	-0.954581	0.265202
-4.33696	-0.604881	0.188199	0.988906	0.55911	0.760843	-0.754454	-0.0193091	0.33779	-0.0432754	0.250892	-0.199949	0.124794	0.145582	0.203158	0.245581	-0.0213985	-0.120555	0.343008	-0.308771	0.485411	-0.953891	0.265047
-4.33648	-0.604829	0.187997	0.989065	0.558487	0.761705	-0.755965	-0.0188582	0.337722	-0.0433632	0.250298	-0.20028	0.124984	0.145525	0.202871	0.245553	-0.0209256	-0.120716	0.343316	-0.308722	0.484595	-0.953799	0.265317
-4.336	-0.604771	0.18777	0.988867	0.557622	0.76291	-0.756283	-0.0189209	0.337215	-0.0433629	0.250777	-0.200746	0.125414	0.145388	0.203182	0.245202	-0.0208676	-0.121047	0.343694	-0.308633	0.484551	-0.953792	0.265339
-4.33552	-0.603498	0.187903	0.989366	0.556759	0.763913	-0.756309	-0.0185571	0.337064	-0.0433687	0.250753	-0.200385	0.125624	0.145232	0.202751	0.245373	-0.0206513	-0.121445	0.343724	-0.308528	0.484249	-0.953647	0.265162
-4.33504	-0.602492	0.187729	0.988566	0.556684	0.764996	-0.756857	-0.0183776	0.33681	-0.0435618	0.250935	-0.200981	0.125597	0.144822	0.202807	0.244825	-0.0201587	-0.12164	0.344022	-0.308682	0.483613	-0.953196	0.26493
-4.33456	-0.601726	0.188051	0.988247	0.554795	0.765862	-0.756375	-0.0183288	0.336446	-0.0424672	0.251485	-0.200335	0.125779	0.144177	0.202642	0.244845	-0.0198741	-0.121969	0.344413	-0.308515	0.483391	-0.952799	0.265074
-4.33408	-0.600854	0.188012	0.987963	0.554109	0.766778	-0.755483	-0.0183377	0.336425	-0.0427662	0.251687	-0.200475	0.125285	0.144184	0.202094	0.244262	-0.0191245	-0.12235	0.34489	-0.308441	0.482897	-0.952208	0.264959
-4.3336	-0.59993	0.187638	0.987443	0.553429	0.76761	-0.754958	-0.0182555	0.336224	-0.042667	0.251417	-0.20005	0.125245	0.14375	0.20149	0.243475	-0.0193178	-0.122562	0.345214	-0.308541	0.482404	-0.952412	0.264919
-4.33312	-0.599093	0.187519	0.987619	0.553527	0.768288	-0.754703	-0.0172064	0.336039	-0.0422963	0.251549	-0.199322	0.125203	0.143754	0.201799	0.243472	-0.0188531	-0.122834	0.345856	-0.308411	0.481658	-0.952893	0.264926
-4.33264	-0.598406	0.187065	0.987314	0.55268	0.769561	-0.755169	-0.0172976	0.335959	-0.0412364	0.251764	-0.1994	0.125395	0.143516	0.201778	0.243816	-0.0182598	-0.122984	0.346429	-0.307977	0.480867	-0.953113	0.26507
-4.33216	-0.597445	0.186768	0.98676	0.552058	0.77077	-0.75485	-0.0172226	0.336016	-0.0419312	0.252164	-0.199549	0.12556	0.143041	0.201661	0.243954	-0.0175489	-0.12313	0.347013	-0.30775	0.480811	-0.95304	0.26487
-4.33168	-0.597374	0.186628	0.986001	0.55167	0.771923	-0.755002	-0.0167485	0.336121	-0.0416609	0.252227	-0.198985	0.126011	0.142912	0.201152	0.243907	-0.0175518	-0.12339	0.34806	-0.307843	0.479636	-0.952664	0.264759
-4.3312	-0.596376	0.186925	0.985792	0.551633	0.773135	-0.754039	-0.0159183	0.336115	-0.0414408	0.252698	-0.198674	0.126769	0.142806	0.20166	0.244207	-0.0176515	-0.123477	0.348391	-0.30801	0.478728	-0.952639	0.264677
-4.33072	-0.595845	0.187053	0.985466	0.551724	0.774288	-0.754726	-0.0156179	0.336163	-0.0419205	0.253232	-0.197805	0.12719	0.142806	0.201178	0.244233	-0.0177969	-0.123568	0.349003	-0.30821	0.478224	-0.953211	0.264926
-4.33024	-0.595341	0.18685	0.985355	0.551717	0.774577	-0.754768	-0.0145907	0.336068	-0.0416769	0.253918	-0.197253	0.127758	0.142552	0.20086	0.244121	-0.0175373	-0.123472	0.34964	-0.308231	0.477648	-0.952601	0.26487
-4.32976	-0.594054	0.186561	0.985708	0.550873	0.775558	-0.754755	-0.0142943	0.336129	-0.0413405	0.254538	-0.196018	0.127914	0.142354	0.200472	0.244666	-0.0178675	-0.123305	0.350215	-0.307707	0.477051	-0.952875	0.264881
-4.32928	-0.593372	0.186707	0.985997	0.550965	0.776656	-0.753681	-0.0145457	0.336247	-0.0415342	0.254952	-0.193935	0.128606	0.14204	0.200842	0.245224	-0.0176362	-0.123323	0.350549	-0.30765	0.476482	-0.953107	0.264702
-4.3288	-0.592048	0.186676	0.985836	0.550928	0.777995	-0.753916	-0.0138253	0.336137	-0.0422715	0.255648	-0.194242	0.128569	0.14174	0.200738	0.245275	-0.0175506	-0.123317	0.35105	-0.307836	0.475482	-0.952844	0.26447
-4.32832	-0.591896	0.18676	0.985302	0.550241	0.77941	-0.754282	-0.0129968	0.3362	-0.0427605	0.256103	-0.193466	0.128817	0.141284	0.200551	0.245721	-0.0172168	-0.123233	0.351649	-0.307855	0.474836	-0.95291	0.26393
-4.32784	-0.59159	0.187458	0.984818	0.54977	0.780594	-0.754396	-0.0129735	0.336142	-0.0428064	0.256577	-0.192137	0.128951	0.140998	0.200134	0.245595	-0.0168588	-0.12335	0.3526	-0.307873	0.473959	-0.953045	0.263616
-4.32736	-0.591632	0.187467	0.984173	0.549519	0.781499	-0.755344	-0.013074	0.335977	-0.0435103	0.256904	-0.191239	0.129094	0.140685	0.199671	0.246462	-0.0159646	-0.123461	0.353253	-0.307889	0.473141	-0.953354	0.263346
-4.32688	-0.591355	0.187356	0.984225	0.550161	0.782425	-0.755286	-0.0120384	0.335988	-0.0437135	0.257155	-0.190711	0.129283	0.140598	0.1993	0.246693	-0.0154159	-0.123479	0.354123	-0.307982	0.472399	-0.953637	0.263587
-4.3264	-0.591142	0.187518	0.983501	0.5488	0.782957	-0.754938	-0.0118372	0.336125	-0.0434297	0.25777	-0.189307	0.129877	0.140175	0.199093	0.246463	-0.0147551	-0.123416	0.354401	-0.307945	0.471629	-0.953516	0.263424
-4.32592	-0.591545	0.187436	0.983252	0.547785	0.783886	-0.755111	-0.0122294	0.33615	-0.0436899	0.25785	-0.188275	0.129052	0.139807	0.199365	0.24633	-0.0144543	-0.123481	0.355205	-0.307945	0.471196	-0.953942	0.263828
-4.32544	-0.591397	0.18743	0.982548	0.548594	0.785006	-0.755997	-0.0117108	0.336099	-0.0434099	0.258262	-0.18778	0.128839	0.139421	0.198557	0.246167	-0.0143276	-0.123295	0.355576	-0.308058	0.470594	-0.954268	0.263621
-4.32496	-0.591022	0.187206	0.982671	0.549168	0.785963	-0.756689	-0.0114443	0.33601	-0.0442549	0.258707	-0.187749	0.128734	0.139105	0.198426	0.245971	-0.0137629	-0.123375	0.356381	-0.308218	0.469837	-0.954576	0.263681
-4.32448	-0.59128	0.186684	0.982162	0.548882	0.786841	-0.757968	-0.0111706	0.335818	-0.0451871	0.2597	-0.18604	0.12893	0.138948	0.197908	0.24555	-0.0133386	-0.123401	0.356437	-0.308016	0.469152	-0.954493	0.263641
-4.324	-0.590803	0.186588	0.981797	0.549777	0.787413	-0.758893	-0.0105868	0.33575	-0.0457134	0.260387	-0.185781	0.128966	0.138784	0.198051	0.244853	-0.0125599	-0.123046	0.356932	-0.308244	0.468579	-0.954496	0.263928
-4.32352	-0.590465	0.186254	0.981432	0.5495	0.788331	-0.759585	-0.00989008	0.335784	-0.0461997	0.260866	-0.184676	0.128913	0.13848	0.197603	0.245449	-0.0120967	-0.122623	0.357347	-0.307865	0.467992	-0.954511	0.263953
-4.32304	-0.59011	0.186302	0.981369	0.54943	0.788898	-0.760285	-0.00924758	0.335816	-0.0463022	0.261555	-0.184305	0.129106	0.138306	0.197545	0.245908	-0.0115252	-0.122415	0.357448	-0.307426	0.467861	-0.954172	0.263758
-4.32256	-0.590014	0.186055	0.981405	0.549594	0.789934	-0.760688	-0.0085405	0.335488	-0.0466228	0.261809	-0.183055	0.128919	0.138398	0.197197	0.246507	-0.0113268	-0.122281	0.357848	-0.307477	0.467135	-0.954611	0.263874
-4.32208	-0.589589	0.186305	0.980962	0.549756	0.790798	-0.760771	-0.00804672	0.335618	-0.0473724	0.262751	-0.182115	0.128678	0.138529	0.197457	0.246662	-0.0109632	-0.122092	0.35784	-0.307152	0.46678	-0.954444	0.264095
-4.3216	-0.589104	0.185726	0.981685	0.550727	0.791609	-0.760605	-0.00747494	0.335585	-0.0473687	0.263372	-0.180969	0.128394	0.138244	0.197401	0.246785	-0.010176	-0.121976	0.358127	-0.306978	0.466355	-0.954311	0.263959
-4.32112	-0.590404	0.185983	0.981918	0.551073	0.792609	-0.762081	-0.00637929	0.335554	-0.0483132	0.26371	-0.179903	0.128421	0.138116	0.197405	0.246757	-0.00924666	-0.121829	0.358568	-0.306888	0.465862	-0.953867	0.264373
-4.32064	-0.590266	0.18576	0.982078	0.551458	0.793156	-0.762015	-0.00615745	0.335398	-0.0488279	0.264411	-0.178945	0.128786	0.137959	0.197174	0.247493	-0.0087025	-0.121691	0.358979	-0.306805	0.465424	-0.953614	0.26415
-4.32016	-0.59008	0.185709	0.981779	0.552514	0.794226	-0.762387	-0.00536014	0.335539	-0.0499897	0.265381	-0.178484	0.128976	0.137742	0.197042	0.248384	-0.00807792	-0.121439	0.359573	-0.306761	0.464719	-0.953424	0.264354
-4.31968	-0.590009	0.185601	0.981622	0.553608	0.795116	-0.761256	-0.0050562	0.335413	-0.049745	0.266295	-0.178169	0.129267	0.137728	0.197365	0.248742	-0.00733223	-0.121385	0.359989	-0.306856	0.464093	-0.953486	0.264619
-4.3192	-0.589988	0.185677	0.981848	0.55478	0.795846	-0.76166	-0.00406815	0.335271	-0.0505395	0.266629	-0.178033	0.128438	0.137613	0.197374	0.249701	-0.00660409	-0.121381	0.360349	-0.306914	0.463712	-0.953231	0.264738
-4.31872	-0.590246	0.186109	0.981805	0.555916	0.796749	-0.762545	-0.00325221	0.335092	-0.050758	0.267332	-0.177363	0.128116	0.137521	0.197698	0.250118	-0.00588235	-0.121257	0.360701	-0.306885	0.463146	-0.953184	0.264747
-4.31824	-0.589992	0.186054	0.981246	0.555815	0.798068	-0.763105	-0.00311954	0.334854	-0.0512521	0.268185	-0.177474	0.128091	0.137043	0.197641	0.250207	-0.00557139	-0.121426	0.361427	-0.306792	0.46278	-0.952896	0.264878
-4.31776	-0.589722	0.185964	0.980841	0.556157	0.799204	-0.763349	-0.00283278	0.334791	-0.0514756	0.268846	-0.1779	0.127953	0.136703	0.197486	0.25024	-0.0050512	-0.121336	0.36193	-0.306915	0.462481	-0.952578	0.264854
-4.31728	-0.59054	0.186004	0.980511	0.555813	0.800271	-0.76461	-0.00223838	0.334544	-0.0511148	0.269743	-0.177256	0.12762	0.136469	0.197279	0.25085	-0.0044799	-0.120865	0.362634	-0.306896	0.462163	-0.952813	0.264822
-4.3168	-0.589626	0.186692	0.980464	0.557084	0.801114	-0.76578	-0.0016748	0.334467	-0.0513917	0.270872	-0.17717	0.127347	0.136166	0.197205	0.251631	-0.00419009	-0.12047	0.363063	-0.306853	0.461727	-0.952923	0.264762
-4.31632	-0.590263	0.186683	0.98002	0.557192	0.802083	-0.767266	-0.00101797	0.33428	-0.0523145	0.271809	-0.175773	0.127889	0.135835	0.19685	0.251399	-0.00357691	-0.120063	0.363737	-0.306709	0.46114	-0.953677	0.265003
-4.31584	-0.590466	0.18713	0.980255	0.556666	0.802869	-0.767822	-0.000556909	0.334176	-0.0527795	0.272635	-0.174869	0.127821	0.135621	0.197074	0.251709	-0.00288778	-0.119877	0.364457	-0.30665	0.460791	-0.953676	0.265347
-4.31536	-0.591184	0.187558	0.980454	0.558158	0.803647	-0.768403	0.000354235	0.334052	-0.0530544	0.273532	-0.17414	0.126863	0.135438	0.197408	0.252005	-0.00210364	-0.119616	0.36516	-0.306816	0.460505	-0.954066	0.265694
-4.31488	-0.591883	0.187202	0.980944	0.558288	0.804372	-0.767881	0.000541632	0.333963	-0.0532074	0.27461	-0.173353	0.12645	0.135171	0.197598	0.252067	-0.00145087	-0.119444	0.366047	-0.306782	0.460061	-0.953658	0.266197
-4.3144	-0.592163	0.186863	0.980747	0.558296	0.804917	-0.768718	0.00075432	0.334002	-0.0530593	0.275012	-0.172724	0.125794	0.135091	0.197542	0.251763	-0.00123858	-0.119416	0.366885	-0.306654	0.45956	-0.953848	0.266465
-4.31392	-0.592408	0.186828	0.980783	0.557445	0.805978	-0.7694	0.00114452	0.333954	-0.053504	0.275872	-0.172421	0.125235	0.135111	0.19758	0.252053	-0.000909424	-0.118956	0.367357	-0.306552	0.458855	-0.953524	0.266669
-4.31344	-0.592302	0.186935	0.98023	0.55699	0.806366	-0.770208	0.00143147	0.333674	-0.0538963	0.276422	-0.172145	0.124706	0.134933	0.197882	0.251687	0.000427791	-0.118455	0.367519	-0.306635	0.458266	-0.953911	0.266757
-4.31296	-0.592318	0.186516	0.979311	0.558197	0.807429	-0.770228	0.00142572	0.333581	-0.0539418	0.277413	-0.171561	0.124304	0.134684	0.197925	0.252508	0.000961249	-0.118412	0.367933	-0.306599	0.457869	-0.954014	0.267298
-4.31248	-0.592302	0.186524	0.979029	0.558342	0.807932	-0.770913	0.00173611	0.3334	-0.0538461	0.277555	-0.171877	0.123554	0.134507	0.197935	0.252837	0.0016946	-0.118341	0.368402	-0.306442	0.457516	-0.953965	0.267445
-4.312	-0.592072	0.186148	0.978625	0.557562	0.808816	-0.770657	0.00155172	0.333248	-0.0531323	0.278259	-0.172582	0.123587	0.13443	0.197807	0.253022	0.00265849	-0.118234	0.368868	-0.306396	0.45723	-0.954187	0.267548
-4.31152	-0.592581	0.185631	0.979264	0.557971	0.809935	-0.770972	0.00149424	0.33304	-0.0532375	0.278639	-0.173788	0.123261	0.134145	0.197738	0.253385	0.00354263	-0.117956	0.369222	-0.306215	0.457037	-0.954694	0.267643
-4.31104	-0.593051	0.185489	0.979715	0.557846	0.810407	-0.770892	0.00194427	0.332924	-0.0539754	0.27941	-0.173066	0.123417	0.133961	0.197327	0.252939	0.00431908	-0.117696	0.369363	-0.306019	0.456843	-0.95455	0.267826
-4.31056	-0.592886	0.185614	0.979377	0.557923	0.811309	-0.770786	0.00253105	0.332789	-0.0545062	0.280015	-0.174317	0.122809	0.133867	0.196775	0.252862	0.00434974	-0.117483	0.369681	-0.305902	0.456139	-0.954637	0.267957
-4.31008	-0.593224	0.185664	0.979487	0.557843	0.812072	-0.77168	0.00305728	0.332821	-0.0547255	0.280145	-0.173669	0.122915	0.133834	0.197112	0.25344	0.00500859	-0.117275	0.369904	-0.305903	0.455933	-0.954814	0.268172
-4.3096	-0.593065	0.185005	0.979448	0.557247	0.813025	-0.771873	0.00339567	0.33274	-0.0549702	0.280421	-0.172251	0.12258	0.13385	0.197037	0.254205	0.00548586	-0.11744	0.370519	-0.305766	0.455642	-0.954837	0.268752
-4.30912	-0.593407	0.184964	0.979456	0.556841	0.813904	-0.773001	0.00377145	0.332547	-0.0552512	0.280651	-0.171897	0.122492	0.133987	0.197048	0.25486	0.00603646	-0.11739	0.370846	-0.305299	0.455234	-0.954642	0.269166
-4.30864	-0.594056	0.185097	0.979539	0.557662	0.814889	-0.773999	0.00400677	0.332663	-0.0560807	0.281109	-0.172123	0.122616	0.133795	0.197082	0.255088	0.00620161	-0.117002	0.371259	-0.304924	0.454715	-0.955188	0.269866
-4.30816	-0.593756	0.184826	0.979202	0.557716	0.815123	-0.774067	0.00428875	0.332648	-0.0573526	0.281558	-0.17356	0.12286	0.133433	0.197541	0.255922	0.00630621	-0.116656	0.372011	-0.30514	0.454563	-0.9548	0.270142
-4.30768	-0.593558	0.184583	0.978683	0.557342	0.815651	-0.774142	0.00417269	0.332669	-0.057953	0.281629	-0.17293	0.122835	0.133428	0.197391	0.256293	0.00734084	-0.116379	0.372514	-0.305261	0.454215	-0.954189	0.270531
-4.3072	-0.593079	0.18437	0.978334	0.557993	0.816106	-0.775681	0.00491416	0.332717	-0.057867	0.282706	-0.175025	0.122288	0.133593	0.197558	0.257008	0.00805887	-0.116041	0.373015	-0.304827	0.453911	-0.954336	0.270782
-4.30672	-0.593038	0.184529	0.978723	0.557871	0.817043	-0.775496	0.00486889	0.332874	-0.0580863	0.283416	-0.176688	0.122361	0.133565	0.197886	0.257012	0.0085162	-0.115489	0.373343	-0.304611	0.45358	-0.954507	0.270805
-4.30624	-0.592975	0.184441	0.979055	0.557933	0.817317	-0.776086	0.00568263	0.33262	-0.0589223	0.284345	-0.176161	0.122321	0.133379	0.197547	0.257534	0.00911631	-0.115351	0.37387	-0.304487	0.452991	-0.954537	0.27103
-4.30576	-0.593036	0.184342	0.979333	0.557967	0.817922	-0.776664	0.00608949	0.332661	-0.0581496	0.285051	-0.175909	0.121985	0.133229	0.197611	0.258062	0.00932928	-0.115076	0.374122	-0.304293	0.452449	-0.954965	0.271429
-4.30528	-0.593349	0.184099	0.978669	0.558238	0.81887	-0.777184	0.0067458	0.332774	-0.058261	0.285999	-0.176214	0.122406	0.133029	0.197495	0.25875	0.0097868	-0.114603	0.374433	-0.303653	0.451866	-0.955139	0.271709
-4.3048	-0.593378	0.183312	0.978712	0.55766	0.820051	-0.777865	0.00734538	0.332726	-0.0588557	0.28668	-0.176175	0.12193	0.13292	0.197408	0.259178	0.0103361	-0.114676	0.374544	-0.303487	0.451624	-0.954679	0.272073
-4.30432	-0.594612	0.183322	0.979021	0.557474	0.821002	-0.779001	0.00712435	0.33285	-0.0595339	0.28716	-0.176633	0.122128	0.13249	0.197529	0.259787	0.0107003	-0.114509	0.374987	-0.303416	0.451003	-0.955077	0.272484
-4.30384	-0.594616	0.182815	0.978659	0.558223	0.821925	-0.779605	0.00793624	0.33271	-0.0603021	0.287836	-0.177672	0.121497	0.132221	0.197579	0.260318	0.011431	-0.113927	0.375385	-0.303227	0.450356	-0.955076	0.272469
-4.30336	-0.594897	0.182344	0.978823	0.557478	0.823027	-0.780322	0.00834139	0.33254	-0.0606634	0.288095	-0.176609	0.120859	0.132071	0.197333	0.260961	0.0120693	-0.113693	0.375618	-0.302959	0.450124	-0.955141	0.272288
-4.30288	-0.594419	0.182486	0.978756	0.556396	0.823727	-0.780994	0.0088161	0.332709	-0.0606366	0.28881	-0.179324	0.120873	0.131603	0.197025	0.260537	0.0124458	-0.113685	0.375971	-0.302849	0.449889	-0.955345	0.272402
-4.3024	-0.594099	0.18272	0.978622	0.555964	0.824485	-0.781704	0.00947156	0.33289	-0.0604882	0.288878	-0.179738	0.120551	0.131151	0.196571	0.260613	0.0128282	-0.113369	0.376161	-0.30263	0.449834	-0.95573	0.272497
-4.30192	-0.59328	0.182583	0.977785	0.556928	0.825643	-0.781416	0.00985956	0.333038	-0.0611183	0.289529	-0.180308	0.120459	0.130575	0.196341	0.260671	0.0139597	-0.113261	0.376518	-0.302366	0.449396	-0.956497	0.272621
-4.30144	-0.592943	0.181837	0.977355	0.556385	0.826471	-0.782002	0.00994618	0.333095	-0.0615668	0.2901	-0.179968	0.119925	0.130513	0.196215	0.260809	0.0147081	-0.112925	0.377339	-0.302385	0.449172	-0.9567	0.27222
-4.30096	-0.591981	0.182071	0.976757	0.557047	0.826972	-0.783455	0.0103315	0.333223	-0.0617397	0.290273	-0.180584	0.119481	0.130208	0.196422	0.261269	0.0160957	-0.112656	0.377588	-0.302465	0.448676	-0.957002	0.272709
-4.30048	-0.590949	0.181779	0.97646	0.555784	0.827342	-0.78526	0.0107866	0.333315	-0.0623549	0.290579	-0.180349	0.119839	0.130378	0.196467	0.262289	0.016743	-0.112411	0.378227	-0.302177	0.448379	-0.956909	0.272754
-4.3	-0.589953	0.182131	0.975782	0.55486	0.828202	-0.786137	0.011035	0.333339	-0.0630901	0.290828	-0.180716	0.119891	0.130043	0.196289	0.262449	0.0177766	-0.111982	0.37863	-0.30209	0.448212	-0.957026	0.273424
-4.29952	-0.589079	0.181844	0.975816	0.554943	0.828866	-0.7876	0.011333	0.333326	-0.0633862	0.291474	-0.180758	0.119391	0.129919	0.196371	0.262791	0.0182018	-0.112083	0.379362	-0.301813	0.448035	-0.957355	0.273462
-4.29904	-0.588862	0.181562	0.975611	0.555803	0.829249	-0.788776	0.0118004	0.333447	-0.0635972	0.291839	-0.18103	0.119143	0.130377	0.196361	0.263534	0.0187241	-0.112076	0.379593	-0.301843	0.44742	-0.95758	0.273738
-4.29856	-0.588214	0.181453	0.975533	0.555893	0.830336	-0.790073	0.0129083	0.333536	-0.0638524	0.292073	-0.181929	0.119465	0.130342	0.195727	0.263781	0.0192746	-0.11186	0.380034	-0.301798	0.447075	-0.95782	0.274064
-4.29808	-0.587294	0.181443	0.97514	0.556489	0.831197	-0.78991	0.0135176	0.333505	-0.0642306	0.29245	-0.183023	0.119359	0.130213	0.195983	0.264375	0.0199146	-0.111711	0.380608	-0.301433	0.447103	-0.958042	0.274536
-4.2976	-0.586991	0.180888	0.975114	0.556745	0.8318	-0.789909	0.0144567	0.33342	-0.0642087	0.292746	-0.184412	0.119095	0.130057	0.195944	0.264772	0.0204853	-0.111462	0.38123	-0.301198	0.446338	-0.9584	0.274501
-4.29712	-0.587088	0.180489	0.975268	0.557685	0.831993	-0.789339	0.0153522	0.333245	-0.0647118	0.29302	-0.185365	0.118794	0.129763	0.196049	0.265166	0.0211206	-0.111051	0.382061	-0.301057	0.445881	-0.958913	0.274823
-4.29664	-0.5867	0.18049	0.975161	0.557637	0.832965	-0.790078	0.0159305	0.333162	-0.0647329	0.292929	-0.184985	0.119327	0.129605	0.196426	0.266346	0.0210338	-0.110852	0.382712	-0.300571	0.445342	-0.959411	0.275039
-4.29616	-0.586735	0.180132	0.974814	0.557326	0.834304	-0.789684	0.0165841	0.33333	-0.0643979	0.293763	-0.185251	0.118977	0.129303	0.196726	0.266772	0.0213343	-0.11077	0.383341	-0.300529	0.445213	-0.959783	0.27516
-4.29568	-0.586422	0.179394	0.974919	0.556809	0.835176	-0.78972	0.0170648	0.333289	-0.0641737	0.294394	-0.186919	0.119158	0.129084	0.196891	0.267416	0.0219336	-0.110395	0.383843	-0.300385	0.444829	-0.959841	0.275331
-4.2952	-0.58695	0.178294	0.975322	0.556834	0.835826	-0.789346	0.0176756	0.333385	-0.0635544	0.294513	-0.18657	0.118942	0.128974	0.197031	0.267592	0.0220518	-0.110228	0.384471	-0.300093	0.444676	-0.959973	0.275981
-4.29472	-0.586944	0.177617	0.974669	0.555526	0.836321	-0.78946	0.0184797	0.333118	-0.063662	0.295505	-0.186263	0.118783	0.128993	0.19716	0.268061	0.0227973	-0.110039	0.385106	-0.299758	0.444548	-0.960206	0.276476
-4.29424	-0.587387	0.177177	0.97459	0.55556	0.837002	-0.789243	0.0193944	0.332913	-0.0633979	0.29606	-0.185696	0.118455	0.128803	0.197624	0.269337	0.0231811	-0.109925	0.385586	-0.299715	0.444251	-0.960069	0.277143
-4.29376	-0.587328	0.176071	0.974415	0.556982	0.838079	-0.788482	0.0197548	0.332817	-0.063489	0.296794	-0.184529	0.118012	0.128429	0.198085	0.269591	0.023512	-0.110111	0.386329	-0.299752	0.444332	-0.960023	0.277401
-4.29328	-0.587393	0.17493	0.97406	0.556541	0.838362	-0.786953	0.0204158	0.332881	-0.0640532	0.296987	-0.185315	0.118389	0.128079	0.198576	0.269869	0.0241838	-0.109962	0.386953	-0.299551	0.443822	-0.96	0.277635
-4.2928	-0.587915	0.174141	0.974579	0.55732	0.839055	-0.786586	0.0215993	0.332712	-0.0644773	0.297667	-0.185551	0.118175	0.128281	0.198557	0.270241	0.025219	-0.109339	0.38799	-0.299435	0.443355	-0.95994	0.278015
-4.29232	-0.587809	0.174217	0.974126	0.557243	0.839592	-0.785267	0.021799	0.332565	-0.0639261	0.298687	-0.185436	0.118536	0.127808	0.198564	0.270685	0.0261217	-0.108941	0.388386	-0.299491	0.442884	-0.960777	0.278459
-4.29184	-0.587913	0.174192	0.974488	0.559215	0.84027	-0.784714	0.022338	0.332466	-0.0641396	0.299143	-0.184911	0.118132	0.127341	0.198773	0.271173	0.0272257	-0.108523	0.389097	-0.299217	0.442809	-0.960822	0.278731
-4.29136	-0.588141	0.173365	0.9742	0.559557	0.840994	-0.784014	0.0230701	0.332406	-0.0634237	0.29954	-0.184894	0.11779	0.127201	0.199404	0.271721	0.0277694	-0.108305	0.390005	-0.29912	0.442509	-0.960712	0.279343
-4.29088	-0.588566	0.173436	0.973748	0.559573	0.841511	-0.783159	0.0236485	0.332088	-0.062664	0.299522	-0.184518	0.118209	0.126948	0.199884	0.272041	0.0283908	-0.108088	0.390547	-0.299092	0.442274	-0.96118	0.279289
-4.2904	-0.589481	0.173479	0.973488	0.560361	0.842119	-0.783359	0.0237771	0.331968	-0.0624839	0.299889	-0.184776	0.118318	0.126985	0.200083	0.272598	0.0284616	-0.107955	0.390775	-0.299112	0.441832	-0.960834	0.279271
-4.28992	-0.589217	0.173442	0.973033	0.56144	0.842817	-0.78269	0.0245531	0.331855	-0.0623433	0.299727	-0.18478	0.117903	0.126721	0.200623	0.272564	0.0289302	-0.107821	0.391628	-0.299311	0.441798	-0.96101	0.279785
-4.28944	-0.589486	0.174346	0.972941	0.562111	0.843492	-0.78152	0.0250639	0.331979	-0.0617972	0.30038	-0.185067	0.117991	0.126935	0.201001	0.272924	0.0290218	-0.107493	0.392343	-0.299473	0.441443	-0.961289	0.280503
-4.28896	-0.590369	0.174449	0.972477	0.563409	0.844348	-0.781998	0.0254521	0.331834	-0.0621264	0.300718	-0.18521	0.117805	0.126953	0.201385	0.272753	0.0290106	-0.107224	0.39304	-0.299613	0.441235	-0.961107	0.280915
-4.28848	-0.590253	0.174505	0.971555	0.564658	0.845365	-0.781765	0.0253454	0.331774	-0.0620764	0.300492	-0.184667	0.118309	0.126695	0.201547	0.272907	0.0295333	-0.107003	0.393634	-0.299765	0.440882	-0.961402	0.281086
-4.288	-0.590558	0.174179	0.971366	0.56619	0.846101	-0.782796	0.025679	0.331528	-0.0617842	0.300245	-0.184549	0.118155	0.126597	0.201752	0.272947	0.0297031	-0.106582	0.394247	-0.299851	0.44062	-0.961852	0.281394
-4.28752	-0.590556	0.173306	0.971409	0.565845	0.84636	-0.784209	0.0254196	0.331373	-0.0620166	0.300681	-0.184649	0.117938	0.126652	0.202094	0.273385	0.0298895	-0.106448	0.394655	-0.299923	0.439944	-0.961158	0.28221
-4.28704	-0.591242	0.173056	0.971131	0.566246	0.846875	-0.78512	0.0261285	0.331222	-0.061602	0.301024	-0.184031	0.118097	0.126663	0.202178	0.273933	0.0310581	-0.106234	0.395137	-0.299893	0.439639	-0.961021	0.282534
-4.28656	-0.59211	0.17297	0.970792	0.566237	0.847579	-0.785762	0.0260954	0.331182	-0.0620259	0.30096	-0.184994	0.118214	0.126491	0.202777	0.273804	0.0313976	-0.106207	0.395968	-0.300047	0.439242	-0.960523	0.283313
-4.28608	-0.592548	0.173279	0.969957	0.566143	0.848371	-0.787298	0.0265656	0.3311	-0.06189	0.300937	-0.184752	0.118725	0.126516	0.202989	0.274784	0.0314408	-0.106036	0.396471	-0.300165	0.438787	-0.960209	0.283576
-4.2856	-0.593145	0.173224	0.97011	0.566676	0.849104	-0.787198	0.027244	0.330767	-0.0612796	0.301403	-0.184373	0.118574	0.12625	0.20329	0.275032	0.0325081	-0.105996	0.397292	-0.300216	0.438616	-0.960468	0.283922
-4.28512	-0.593433	0.172868	0.96945	0.566701	0.84981	-0.786947	0.0282146	0.330703	-0.0617057	0.30193	-0.183588	0.118929	0.126082	0.203745	0.275016	0.0325991	-0.105871	0.398111	-0.300474	0.437841	-0.960682	0.284381
-4.28464	-0.593673	0.173288	0.96826	0.566595	0.85064	-0.78692	0.0290735	0.330665	-0.0621057	0.30229	-0.183699	0.118588	0.125892	0.20381	0.275081	0.0330814	-0.10566	0.398607	-0.300262	0.437394	-0.960503	0.28462
-4.28416	-0.593695	0.173706	0.968201	0.566988	0.851414	-0.785657	0.0290617	0.330492	-0.0623814	0.302517	-0.181957	0.118975	0.125903	0.204218	0.274543	0.0335036	-0.105566	0.398972	-0.30035	0.436916	-0.96009	0.284886
-4.28368	-0.595646	0.173215	0.967653	0.567383	0.852493	-0.785616	0.0293345	0.330498	-0.0619375	0.302697	-0.181421	0.1191	0.125733	0.20439	0.274397	0.0338435	-0.105274	0.39929	-0.300626	0.436619	-0.959718	0.284962
-4.2832	-0.595656	0.172863	0.967142	0.568037	0.852797	-0.785919	0.0303288	0.330433	-0.061743	0.302765	-0.181467	0.119519	0.12536	0.204584	0.273825	0.0346653	-0.105045	0.39956	-0.300625	0.436058	-0.960171	0.285392
-4.28272	-0.596002	0.172658	0.96735	0.568309	0.853679	-0.786305	0.0318987	0.330416	-0.0617468	0.303785	-0.180625	0.119687	0.12528	0.204459	0.273639	0.0351209	-0.104734	0.399998	-0.300423	0.435823	-0.960271	0.285934
-4.28224	-0.596288	0.173097	0.966854	0.567769	0.854166	-0.786508	0.0325865	0.33021	-0.0614983	0.304264	-0.182065	0.119773	0.125138	0.204354	0.273723	0.0360067	-0.104526	0.40036	-0.300778	0.435525	-0.960754	0.286285
-4.28176	-0.596795	0.172986	0.96654	0.567517	0.854652	-0.786646	0.0334676	0.330463	-0.061794	0.30439	-0.182081	0.120021	0.124775	0.204164	0.274097	0.0365726	-0.104395	0.400836	-0.301172	0.435112	-0.960507	0.286952
-4.28128	-0.597044	0.173056	0.966429	0.56776	0.855037	-0.786399	0.0341553	0.330564	-0.062123	0.305054	-0.181629	0.120489	0.124713	0.20446	0.273823	0.0369848	-0.103978	0.401413	-0.300987	0.434713	-0.960387	0.287237
-4.2808	-0.597999	0.172677	0.965842	0.568178	0.856253	-0.786431	0.0347565	0.330287	-0.0615113	0.305421	-0.181683	0.120719	0.124563	0.204585	0.273107	0.0378212	-0.103942	0.401872	-0.301051	0.434324	-0.960034	0.287674
-4.28032	-0.598203	0.173055	0.965386	0.56793	0.856433	-0.786167	0.0352632	0.330004	-0.0609382	0.305757	-0.180951	0.12056	0.124101	0.20514	0.273585	0.0385235	-0.103732	0.402378	-0.300781	0.43403	-0.959884	0.288191
-4.27984	-0.598216	0.172554	0.965572	0.56783	0.857173	-0.785433	0.0354682	0.329746	-0.0601286	0.305849	-0.181694	0.120113	0.123703	0.205243	0.273286	0.039158	-0.103828	0.402672	-0.300547	0.433348	-0.9595	0.288765
-4.27936	-0.597977	0.172831	0.965026	0.566509	0.857978	-0.78473	0.0357192	0.329378	-0.0598471	0.306263	-0.18168	0.120485	0.123678	0.205477	0.27393	0.0398195	-0.103522	0.403476	-0.300551	0.433061	-0.958881	0.289215
-4.27888	-0.598314	0.172773	0.96476	0.56682	0.858605	-0.785027	0.0364903	0.32923	-0.0589233	0.306553	-0.181363	0.120336	0.123687	0.205517	0.273225	0.0405714	-0.103418	0.403791	-0.300446	0.432967	-0.958552	0.289698
-4.2784	-0.598104	0.172713	0.964214	0.567068	0.859477	-0.785011	0.0369544	0.329036	-0.0593886	0.307028	-0.181282	0.120342	0.123599	0.205788	0.273668	0.0408812	-0.103222	0.404147	-0.300567	0.432733	-0.958525	0.289818
-4.27792	-0.59825	0.173345	0.96412	0.567061	0.860279	-0.784778	0.0376065	0.329102	-0.0597439	0.307485	-0.180601	0.119525	0.123149	0.205604	0.274208	0.0413318	-0.102912	0.404724	-0.300619	0.432362	-0.958043	0.289963
-4.27744	-0.597994	0.173596	0.9636	0.567659	0.860431	-0.784902	0.0380559	0.328988	-0.0602408	0.308107	-0.179125	0.11926	0.123268	0.205368	0.274704	0.0418204	-0.10288	0.40545	-0.300391	0.432331	-0.956907	0.289968
-4.27696	-0.59699	0.173862	0.963339	0.568252	0.860824	-0.784909	0.0383157	0.329095	-0.0597928	0.308379	-0.178201	0.11927	0.123324	0.205239	0.27435	0.0423422	-0.102801	0.405861	-0.300446	0.431757	-0.956372	0.290256
-4.27648	-0.59729	0.173976	0.962673	0.568821	0.861438	-0.783876	0.0391032	0.329098	-0.0601457	0.308568	-0.176831	0.119363	0.123257	0.204807	0.274552	0.0430368	-0.102548	0.406153	-0.300117	0.431361	-0.955937	0.290673
-4.276	-0.597902	0.174653	0.962095	0.5687	0.861767	-0.783628	0.0399264	0.329159	-0.0603382	0.308461	-0.176146	0.118623	0.122577	0.204712	0.274694	0.0435397	-0.102366	0.406634	-0.300087	0.431393	-0.9559	0.290209
-4.27552	-0.598449	0.175462	0.96101	0.568726	0.862973	-0.784887	0.0399073	0.329188	-0.0602798	0.30889	-0.176278	0.118209	0.122321	0.204626	0.275154	0.0437106	-0.102041	0.40702	-0.299922	0.431178	-0.955316	0.290629
-4.27504	-0.599403	0.176127	0.961023	0.568958	0.863642	-0.785476	0.0405574	0.329058	-0.0607085	0.309044	-0.175395	0.117585	0.122419	0.204495	0.2758	0.0439818	-0.101809	0.40737	-0.299922	0.431141	-0.954933	0.290731
-4.27456	-0.598816	0.176706	0.959601	0.569262	0.864459	-0.786022	0.0410997	0.328903	-0.0616033	0.309939	-0.174801	0.118167	0.122168	0.204687	0.276282	0.0444123	-0.101694	0.407904	-0.299873	0.431034	-0.954909	0.290261
-4.27408	-0.599268	0.177564	0.958208	0.568534	0.865548	-0.786648	0.0411404	0.328973	-0.062302	0.310456	-0.174234	0.117651	0.121819	0.204753	0.27692	0.044807	-0.101387	0.408383	-0.300059	0.431115	-0.954916	0.290493
-4.2736	-0.600058	0.178115	0.957292	0.567961	0.866335	-0.787177	0.0415554	0.329012	-0.0624263	0.311173	-0.174091	0.117223	0.121709	0.204868	0.277639	0.0459507	-0.101216	0.408982	-0.300317	0.431125	-0.954275	0.290794
-4.27312	-0.600264	0.178735	0.957396	0.56845	0.866944	-0.787123	0.0421908	0.328988	-0.0624871	0.311309	-0.174343	0.117483	0.121274	0.204507	0.278532	0.046197	-0.101285	0.409479	-0.300643	0.430987	-0.953853	0.291217
-4.27264	-0.600803	0.179159	0.956449	0.569178	0.867564	-0.787078	0.0432647	0.329073	-0.0626842	0.311606	-0.173807	0.117632	0.121481	0.204584	0.279144	0.0460432	-0.101098	0.409989	-0.300871	0.430779	-0.953722	0.291569
-4.27216	-0.600678	0.179402	0.955575	0.568806	0.868626	-0.786381	0.0441031	0.329227	-0.0630204	0.312372	-0.173807	0.117605	0.121274	0.204547	0.279908	0.0470341	-0.101299	0.410372	-0.300721	0.430675	-0.953195	0.291353
-4.27168	-0.600473	0.180154	0.954935	0.569235	0.869046	-0.785973	0.045162	0.329327	-0.0628662	0.31248	-0.173557	0.117058	0.120811	0.205023	0.280215	0.0475536	-0.1014	0.410676	-0.300508	0.430449	-0.952995	0.291609
-4.2712	-0.599342	0.180752	0.955082	0.568511	0.869745	-0.785539	0.0459917	0.329463	-0.0625345	0.312623	-0.17252	0.11654	0.120401	0.205085	0.280533	0.048205	-0.101448	0.410792	-0.300274	0.430306	-0.952867	0.292097
-4.27072	-0.599556	0.181659	0.954146	0.568315	0.870483	-0.786457	0.0472114	0.329561	-0.0627228	0.312819	-0.172273	0.116185	0.120284	0.205065	0.280528	0.0485013	-0.101245	0.411236	-0.300308	0.430165	-0.952183	0.292167
-4.27024	-0.600035	0.182484	0.953652	0.568263	0.871182	-0.78716	0.0485686	0.32959	-0.0624643	0.313219	-0.171633	0.11605	0.120083	0.205039	0.28054	0.0494605	-0.100996	0.411881	-0.300075	0.430227	-0.951351	0.29259
-4.26976	-0.600875	0.183055	0.953762	0.568332	0.871878	-0.787133	0.0487093	0.329783	-0.0629694	0.313519	-0.17187	0.115854	0.120026	0.205382	0.280966	0.0500215	-0.100784	0.412284	-0.300137	0.429776	-0.950556	0.292824
-4.26928	-0.600104	0.183993	0.954158	0.568357	0.87261	-0.786155	0.0493736	0.329854	-0.0648496	0.31372	-0.171228	0.115277	0.119661	0.205678	0.281428	0.0510495	-0.100377	0.412657	-0.300193	0.429727	-0.950435	0.293173
-4.2688	-0.600303	0.18468	0.95479	0.568698	0.873615	-0.7855	0.0507719	0.329944	-0.0655051	0.313681	-0.170992	0.114946	0.119465	0.20609	0.282191	0.0525048	-0.100138	0.412964	-0.300345	0.429662	-0.949648	0.293424
-4.26832	-0.600551	0.18553	0.955115	0.569224	0.874667	-0.784533	0.0517583	0.330144	-0.0661346	0.314165	-0.170953	0.115151	0.11912	0.206574	0.2829	0.0532712	-0.0999214	0.413339	-0.300598	0.429598	-0.948251	0.293681
-4.26784	-0.600655	0.186757	0.955542	0.568548	0.87552	-0.783676	0.052649	0.330044	-0.0657817	0.314092	-0.170705	0.114876	0.119006	0.20669	0.283768	0.0544288	-0.0998057	0.413816	-0.300983	0.429675	-0.94816	0.294671
-4.26736	-0.601168	0.187336	0.955164	0.568567	0.87692	-0.78266	0.0534759	0.329962	-0.0668638	0.314359	-0.171068	0.114725	0.119089	0.207103	0.284145	0.0556105	-0.0996614	0.414264	-0.301012	0.429499	-0.947526	0.295705
-4.26688	-0.601351	0.188598	0.954866	0.569034	0.877329	-0.781563	0.054114	0.329972	-0.0677384	0.314382	-0.171878	0.115244	0.118836	0.207231	0.284151	0.0567242	-0.0992665	0.414476	-0.301209	0.429103	-0.946547	0.296189
-4.2664	-0.601528	0.189472	0.954806	0.568657	0.878085	-0.7814	0.0547699	0.329984	-0.0684507	0.31435	-0.171857	0.114843	0.118665	0.207479	0.284636	0.057361	-0.098987	0.414898	-0.301319	0.429037	-0.946231	0.296858
-4.26592	-0.601156	0.190366	0.955043	0.568926	0.879358	-0.780806	0.0560138	0.329992	-0.06915	0.314685	-0.172073	0.115042	0.118702	0.207797	0.284911	0.0587166	-0.0987268	0.41543	-0.301517	0.428926	-0.945186	0.296985
-4.26544	-0.601218	0.191155	0.954699	0.568048	0.880581	-0.780401	0.0569911	0.330071	-0.0698004	0.315248	-0.17161	0.115329	0.118659	0.208332	0.285345	0.060033	-0.0983743	0.415885	-0.301732	0.428784	-0.944844	0.297312
-4.26496	-0.600938	0.192737	0.954532	0.568335	0.881173	-0.779915	0.0581072	0.329916	-0.0696466	0.315494	-0.170559	0.115576	0.118714	0.208218	0.286393	0.06091	-0.0980824	0.41627	-0.302089	0.428656	-0.943825	0.297496
-4.26448	-0.600185	0.194079	0.954542	0.567557	0.881866	-0.779513	0.0598011	0.329833	-0.0693532	0.315136	-0.170529	0.115786	0.118668	0.208145	0.285258	0.0616326	-0.0980178	0.416804	-0.301823	0.428539	-0.943575	0.297724
-4.264	-0.599257	0.195213	0.954677	0.567729	0.882099	-0.779693	0.0609129	0.330024	-0.0695575	0.315145	-0.170444	0.116102	0.118465	0.208388	0.285394	0.0629239	-0.0979684	0.417313	-0.302087	0.428518	-0.942852	0.298649
-4.26352	-0.60038	0.195921	0.95496	0.56795	0.883242	-0.778779	0.0612919	0.329839	-0.0698897	0.31539	-0.170308	0.116378	0.118473	0.208503	0.285404	0.0635186	-0.0978099	0.417829	-0.302132	0.428555	-0.942055	0.299145
-4.26304	-0.600799	0.19687	0.955251	0.568444	0.884425	-0.778381	0.0622938	0.329864	-0.0691648	0.315436	-0.17036	0.11602	0.118187	0.20863	0.285694	0.0641478	-0.0975924	0.418329	-0.302104	0.428484	-0.941722	0.299652
-4.26256	-0.601662	0.198114	0.955789	0.568299	0.884947	-0.778853	0.0626087	0.329782	-0.0688426	0.315692	-0.171367	0.116088	0.117856	0.209406	0.286063	0.0645843	-0.0976207	0.41887	-0.302438	0.428491	-0.940862	0.300008
-4.26208	-0.601777	0.199357	0.955984	0.567204	0.885963	-0.779004	0.06263	0.329736	-0.0691338	0.315687	-0.171412	0.115608	0.117743	0.209824	0.286355	0.0660668	-0.0969112	0.419617	-0.302792	0.428171	-0.940125	0.300441
-4.2616	-0.602173	0.199947	0.956405	0.56716	0.887153	-0.779823	0.063513	0.32979	-0.0693082	0.315834	-0.170815	0.115475	0.118003	0.210275	0.286754	0.0667127	-0.0966227	0.420448	-0.302741	0.427861	-0.939937	0.300164
-4.26112	-0.603342	0.200137	0.956728	0.566024	0.887716	-0.779448	0.064624	0.329736	-0.0693988	0.316339	-0.170901	0.115308	0.11787	0.210669	0.286771	0.0678013	-0.0962062	0.420887	-0.302991	0.427887	-0.93889	0.300467
-4.26064	-0.604098	0.200809	0.957408	0.565397	0.888564	-0.779457	0.0652378	0.329647	-0.0689421	0.316423	-0.171863	0.114988	0.118193	0.210927	0.286764	0.0689005	-0.0959383	0.421772	-0.302739	0.427872	-0.938261	0.300814
-4.26016	-0.604274	0.201578	0.958102	0.565748	0.889677	-0.779818	0.0659456	0.329737	-0.069144	0.316786	-0.172082	0.115869	0.11804	0.211742	0.287015	0.0696518	-0.0954351	0.422228	-0.302616	0.427621	-0.937231	0.301043
-4.25968	-0.604676	0.202703	0.958148	0.566801	0.890541	-0.779798	0.0668733	0.329753	-0.0685183	0.31663	-0.172356	0.115169	0.118182	0.212621	0.287413	0.0703806	-0.0951063	0.422993	-0.302281	0.427537	-0.936162	0.300971
-4.2592	-0.604482	0.20338	0.958131	0.567603	0.890977	-0.779586	0.0682635	0.329878	-0.0685796	0.316554	-0.171993	0.115313	0.118023	0.212893	0.287709	0.0714349	-0.0946352	0.423536	-0.302555	0.42771	-0.934873	0.301066
-4.25872	-0.604501	0.204408	0.959218	0.568604	0.891744	-0.778816	0.0694115	0.329717	-0.0685347	0.316562	-0.172125	0.115616	0.118317	0.213149	0.28778	0.0724386	-0.0943115	0.424325	-0.302242	0.42738	-0.933688	0.301312
-4.25824	-0.604083	0.205867	0.959721	0.568092	0.892621	-0.777747	0.0705158	0.329891	-0.0686371	0.316557	-0.171639	0.115584	0.118217	0.213672	0.288315	0.0731206	-0.0939495	0.425258	-0.302318	0.427183	-0.932556	0.301324
-4.25776	-0.604188	0.206207	0.959938	0.568801	0.893445	-0.776271	0.0718364	0.329842	-0.0688929	0.316852	-0.172524	0.11497	0.118402	0.214008	0.289248	0.0737643	-0.0934153	0.425896	-0.302046	0.42698	-0.932051	0.301544
-4.25728	-0.604118	0.206827	0.960676	0.569904	0.894427	-0.775514	0.0725119	0.330096	-0.0701388	0.316722	-0.174018	0.11532	0.118194	0.214465	0.289588	0.0751161	-0.0931639	0.426523	-0.301985	0.426729	-0.931085	0.301689
-4.2568	-0.603667	0.208045	0.960787	0.570171	0.895405	-0.775035	0.0739137	0.32993	-0.0702668	0.316461	-0.176067	0.114793	0.118675	0.214634	0.289807	0.0758175	-0.0925319	0.426832	-0.301902	0.426672	-0.930163	0.302005
-4.25632	-0.603844	0.208735	0.961176	0.569932	0.896255	-0.775094	0.0749213	0.330077	-0.0706261	0.3163	-0.17576	0.114842	0.118758	0.215035	0.29014	0.0772702	-0.0923373	0.427318	-0.302196	0.426673	-0.929207	0.302456
-4.25584	-0.604011	0.209937	0.961381	0.570659	0.897303	-0.77423	0.0756225	0.330193	-0.0706743	0.316635	-0.176045	0.115004	0.11868	0.215103	0.290429	0.078021	-0.0922069	0.427903	-0.302005	0.426548	-0.928176	0.302508
-4.25536	-0.604733	0.210568	0.961452	0.571278	0.898097	-0.77321	0.0758067	0.330233	-0.0711178	0.316789	-0.17637	0.11444	0.118576	0.215506	0.290924	0.0791908	-0.0919455	0.428086	-0.302077	0.426393	-0.927422	0.302586
-4.25488	-0.605128	0.211288	0.962285	0.571191	0.899135	-0.77367	0.0767697	0.330317	-0.0710254	0.317325	-0.17714	0.113928	0.11851	0.21577	0.291325	0.0800718	-0.0917361	0.428487	-0.302097	0.426265	-0.926382	0.302906
-4.2544	-0.605746	0.212123	0.962891	0.572764	0.899941	-0.773499	0.0776084	0.330465	-0.0718035	0.317111	-0.177131	0.114255	0.1186	0.216552	0.292111	0.0808718	-0.0916378	0.428849	-0.30205	0.426063	-0.925447	0.303425
-4.25392	-0.605827	0.212691	0.963151	0.572079	0.900318	-0.772959	0.0780723	0.33027	-0.0722389	0.317614	-0.178147	0.114207	0.118922	0.216902	0.293226	0.0815726	-0.0916951	0.429256	-0.302126	0.426062	-0.924731	0.303429
-4.25344	-0.605959	0.213524	0.963289	0.571163	0.900787	-0.772412	0.078474	0.330202	-0.0727028	0.317993	-0.17924	0.113731	0.118967	0.217142	0.293099	0.0820641	-0.0915722	0.429641	-0.302291	0.426105	-0.923994	0.303604
-4.25296	-0.605301	0.214172	0.963902	0.571802	0.90136	-0.771752	0.0792763	0.330086	-0.0725691	0.3184	-0.179246	0.11349	0.119067	0.217537	0.294684	0.083429	-0.0912747	0.430136	-0.302409	0.425431	-0.923064	0.303764
-4.25248	-0.605717	0.214581	0.964372	0.571406	0.901613	-0.771279	0.0792468	0.330156	-0.0720724	0.318896	-0.179285	0.113205	0.119461	0.217778	0.295737	0.0840604	-0.0911953	0.430285	-0.302364	0.425423	-0.92225	0.304104
-4.252	-0.605795	0.2151	0.965242	0.570595	0.902321	-0.771338	0.0790439	0.330126	-0.0720063	0.319253	-0.179211	0.113128	0.119645	0.218185	0.296037	0.0850463	-0.0911283	0.430505	-0.302091	0.425024	-0.922207	0.304019
-4.25152	-0.605754	0.21628	0.96544	0.57021	0.902983	-0.77111	0.0786425	0.330216	-0.0718876	0.319122	-0.179121	0.112347	0.120002	0.218577	0.296338	0.0857258	-0.091118	0.430882	-0.302186	0.425008	-0.921894	0.304011
-4.25104	-0.606189	0.217498	0.965247	0.570153	0.903995	-0.771324	0.079206	0.330168	-0.0719619	0.318976	-0.179774	0.112726	0.120593	0.21878	0.296732	0.0864164	-0.0910485	0.431472	-0.302229	0.424902	-0.921171	0.303968
-4.25056	-0.606722	0.218648	0.965569	0.569491	0.904814	-0.771483	0.0798513	0.330271	-0.0724562	0.319467	-0.179272	0.112584	0.121026	0.219123	0.296739	0.0875391	-0.090878	0.431962	-0.302592	0.42512	-0.920661	0.303952
-4.25008	-0.607491	0.219407	0.965758	0.569266	0.904405	-0.771756	0.0800989	0.330451	-0.0723603	0.320249	-0.179162	0.111986	0.121205	0.219656	0.297164	0.0883536	-0.0907425	0.432386	-0.30264	0.42504	-0.919591	0.304067
-4.2496	-0.607977	0.219775	0.966746	0.5706	0.905026	-0.771361	0.080869	0.330603	-0.0725406	0.320282	-0.178794	0.11202	0.121558	0.219839	0.297365	0.088801	-0.0905327	0.432941	-0.302925	0.425288	-0.918789	0.303777
-4.24912	-0.607786	0.220655	0.967161	0.570815	0.905756	-0.77262	0.0815037	0.330571	-0.0727839	0.320322	-0.177846	0.111528	0.121762	0.219795	0.297906	0.0897115	-0.0905055	0.433518	-0.303326	0.425251	-0.918303	0.303652
-4.24864	-0.608013	0.221374	0.967609	0.572189	0.906251	-0.773107	0.082291	0.33075	-0.0730081	0.320686	-0.177416	0.111964	0.122042	0.220084	0.29843	0.0901229	-0.09026	0.43393	-0.303156	0.424953	-0.918314	0.303562
-4.24816	-0.607634	0.222332	0.967992	0.572373	0.906725	-0.773526	0.0826781	0.330991	-0.0728659	0.320452	-0.178023	0.1119	0.121994	0.220638	0.30049	0.0910009	-0.0903813	0.434309	-0.303079	0.42479	-0.917258	0.303909
-4.24768	-0.60848	0.223119	0.968869	0.573129	0.907663	-0.774573	0.0834274	0.331021	-0.0728545	0.319917	-0.177706	0.111824	0.122209	0.220779	0.301369	0.0913576	-0.0905085	0.434518	-0.302962	0.424572	-0.916592	0.304043
-4.2472	-0.608707	0.224548	0.96929	0.573694	0.908131	-0.774361	0.0845055	0.33099	-0.0733457	0.319357	-0.178132	0.112061	0.122153	0.220742	0.301917	0.0918859	-0.090356	0.434733	-0.303028	0.42419	-0.915581	0.304553
-4.24672	-0.608984	0.224934	0.969679	0.574662	0.908994	-0.77398	0.0845819	0.331228	-0.0732734	0.319631	-0.177825	0.112205	0.122127	0.221002	0.302006	0.092717	-0.0902834	0.435356	-0.302921	0.42413	-0.914999	0.304357
-4.24624	-0.60956	0.225624	0.970262	0.574697	0.908657	-0.773813	0.0850839	0.331519	-0.0737349	0.319937	-0.178059	0.112054	0.122254	0.220977	0.302236	0.0932405	-0.0899964	0.435583	-0.302806	0.423828	-0.914801	0.304472
-4.24576	-0.610232	0.227138	0.970588	0.575088	0.908828	-0.775587	0.085751	0.331616	-0.0742222	0.319986	-0.178452	0.11238	0.122194	0.221031	0.302309	0.0939906	-0.0898603	0.436039	-0.302881	0.423688	-0.914117	0.30522
-4.24528	-0.610725	0.227971	0.970566	0.575709	0.90982	-0.776649	0.086454	0.331595	-0.0741124	0.319906	-0.178647	0.112697	0.122222	0.220907	0.302818	0.0951308	-0.0896744	0.436353	-0.302797	0.423654	-0.912438	0.305543
-4.2448	-0.611775	0.228327	0.970816	0.576347	0.910795	-0.777873	0.0865418	0.331771	-0.0734493	0.320588	-0.179022	0.112514	0.122352	0.221241	0.303591	0.0966515	-0.0894758	0.436697	-0.302654	0.423487	-0.911936	0.305726
-4.24432	-0.613059	0.228783	0.971122	0.575864	0.911234	-0.777864	0.0865275	0.33169	-0.0731335	0.320843	-0.179863	0.111869	0.122498	0.221267	0.304045	0.0980706	-0.0894992	0.437088	-0.302861	0.423156	-0.910796	0.30596
-4.24384	-0.613234	0.229122	0.971008	0.575783	0.9122	-0.778487	0.0869999	0.331739	-0.0726123	0.320828	-0.179863	0.111821	0.122478	0.221759	0.304785	0.0986313	-0.0894066	0.437267	-0.303186	0.423145	-0.910446	0.306242
-4.24336	-0.612867	0.229341	0.97069	0.576842	0.912917	-0.778728	0.0879131	0.331676	-0.0731209	0.320468	-0.180357	0.11146	0.12243	0.222242	0.305205	0.0991141	-0.0894626	0.437692	-0.303097	0.422785	-0.909556	0.306634
-4.24288	-0.612683	0.230047	0.970454	0.576922	0.913521	-0.779848	0.0885312	0.331703	-0.0738885	0.320674	-0.180492	0.111693	0.122759	0.222426	0.305999	0.0996171	-0.0893732	0.437961	-0.303142	0.422796	-0.909318	0.306474
-4.2424	-0.613083	0.231192	0.97036	0.576121	0.914476	-0.779896	0.0891428	0.331768	-0.073923	0.32155	-0.18038	0.111232	0.122592	0.222755	0.30704	0.100289	-0.0892189	0.438365	-0.303222	0.42282	-0.909782	0.306499
-4.24192	-0.614617	0.230913	0.970028	0.576282	0.915432	-0.780694	0.0896727	0.331726	-0.0738981	0.321689	-0.180323	0.111512	0.122824	0.223347	0.30776	0.101075	-0.0891605	0.438819	-0.303706	0.422954	-0.908936	0.306906
-4.24144	-0.614136	0.230687	0.970289	0.576053	0.91615	-0.780125	0.0905802	0.331883	-0.0740975	0.321724	-0.181018	0.112027	0.123069	0.223309	0.307791	0.102115	-0.089144	0.439354	-0.30395	0.422912	-0.908433	0.307667
-4.24096	-0.614735	0.230874	0.970241	0.576044	0.916647	-0.780283	0.0914757	0.332009	-0.07361	0.32152	-0.18122	0.112392	0.123263	0.223248	0.308668	0.102966	-0.0891988	0.439529	-0.304003	0.422739	-0.907119	0.308082
-4.24048	-0.615514	0.231595	0.970129	0.576774	0.917425	-0.779777	0.0918429	0.331899	-0.0735405	0.321114	-0.181196	0.112434	0.123652	0.22367	0.309183	0.104049	-0.0892466	0.439798	-0.30394	0.422595	-0.906463	0.30867
-4.24	-0.616389	0.231491	0.970322	0.575735	0.918125	-0.780445	0.0920135	0.332064	-0.0731783	0.321338	-0.18096	0.112376	0.123927	0.223771	0.309582	0.104742	-0.0888347	0.440193	-0.30409	0.422257	-0.905971	0.308923
-4.23952	-0.61716	0.231171	0.970003	0.575512	0.919229	-0.781017	0.0927948	0.331898	-0.0733862	0.321488	-0.18108	0.112432	0.124136	0.223904	0.310359	0.105319	-0.0889419	0.440515	-0.304067	0.421483	-0.905682	0.309466
-4.23904	-0.617887	0.231451	0.969697	0.575935	0.919815	-0.782807	0.093682	0.331858	-0.0727489	0.321798	-0.179451	0.111989	0.124215	0.223949	0.310952	0.106225	-0.088803	0.440887	-0.303958	0.421426	-0.905204	0.309681
-4.23856	-0.618511	0.23191	0.970186	0.575525	0.920491	-0.782972	0.0941438	0.331886	-0.0727066	0.321786	-0.1793	0.111636	0.124503	0.223886	0.311605	0.107072	-0.0886597	0.441144	-0.303738	0.421188	-0.903953	0.309955
-4.23808	-0.618397	0.232344	0.970532	0.574756	0.921751	-0.783174	0.0941236	0.331712	-0.0725133	0.322396	-0.179493	0.111576	0.124861	0.224278	0.31198	0.107795	-0.0885563	0.441182	-0.303541	0.421129	-0.903397	0.310282
-4.2376	-0.618851	0.23258	0.970172	0.575078	0.921997	-0.782368	0.0941592	0.331736	-0.0717473	0.322731	-0.179759	0.111605	0.124965	0.224946	0.312761	0.108943	-0.088452	0.441636	-0.303617	0.421369	-0.902529	0.310324
-4.23712	-0.618006	0.232743	0.970137	0.574623	0.923048	-0.781589	0.0943282	0.331647	-0.0709674	0.322629	-0.179161	0.111241	0.125028	0.225033	0.312222	0.109446	-0.0881388	0.441899	-0.303985	0.42089	-0.90054	0.31079
-4.23664	-0.618501	0.232517	0.970454	0.574821	0.92378	-0.781659	0.0947332	0.331653	-0.0702776	0.322948	-0.177838	0.110879	0.125213	0.225021	0.312708	0.110218	-0.0880656	0.4421	-0.304244	0.421011	-0.900249	0.311143
-4.23616	-0.618163	0.232869	0.970407	0.575287	0.924127	-0.781364	0.0945053	0.33196	-0.0706701	0.323221	-0.17687	0.111061	0.125373	0.225472	0.312709	0.110501	-0.0881575	0.442588	-0.304253	0.420934	-0.899352	0.311198
-4.23568	-0.617928	0.233326	0.970048	0.574302	0.924721	-0.780278	0.0948147	0.331979	-0.0701701	0.323911	-0.177136	0.111441	0.125331	0.225748	0.313033	0.111149	-0.0879905	0.44277	-0.304176	0.421	-0.898914	0.311145
-4.2352	-0.618045	0.234033	0.969798	0.573079	0.924863	-0.78014	0.0948888	0.332045	-0.0700545	0.324213	-0.176662	0.11104	0.125531	0.226064	0.313272	0.111639	-0.0876776	0.44315	-0.304233	0.420955	-0.898046	0.311406
-4.23472	-0.617304	0.235051	0.969566	0.5719	0.925042	-0.779703	0.0953968	0.331938	-0.070187	0.324475	-0.175689	0.110726	0.125865	0.225917	0.314296	0.11293	-0.0875489	0.443609	-0.304225	0.420666	-0.897523	0.311649
-4.23424	-0.616845	0.23594	0.969128	0.571142	0.925729	-0.779121	0.096172	0.332048	-0.0703341	0.324613	-0.176258	0.110797	0.126135	0.225735	0.315102	0.113054	-0.0872612	0.443786	-0.304125	0.420758	-0.896533	0.311542
-4.23376	-0.616544	0.236584	0.968945	0.570162	0.926591	-0.776965	0.0961722	0.332004	-0.0695693	0.325036	-0.17565	0.11045	0.126209	0.22604	0.316257	0.113749	-0.0871739	0.444484	-0.304005	0.420716	-0.89518	0.311723
-4.23328	-0.616162	0.237176	0.969037	0.569799	0.927037	-0.776135	0.0973678	0.331968	-0.0697093	0.325625	-0.173934	0.109975	0.126367	0.225658	0.317104	0.114559	-0.0867847	0.445123	-0.304249	0.420766	-0.89464	0.311707
-4.2328	-0.615545	0.238123	0.968528	0.569167	0.92746	-0.776256	0.0979707	0.331837	-0.0695686	0.325699	-0.173974	0.109566	0.126817	0.225871	0.317864	0.115476	-0.0867766	0.445727	-0.304138	0.420785	-0.893855	0.312101
-4.23232	-0.614975	0.238641	0.968528	0.567953	0.928228	-0.77704	0.0986308	0.331767	-0.0691099	0.325379	-0.17357	0.109534	0.12696	0.226146	0.318908	0.116663	-0.0865939	0.446039	-0.304451	0.420798	-0.893676	0.311929
-4.23184	-0.614159	0.23946	0.968218	0.566689	0.928447	-0.77681	0.0998184	0.331578	-0.068507	0.325242	-0.173127	0.109401	0.126989	0.226145	0.319473	0.117238	-0.086181	0.446449	-0.304722	0.420697	-0.893201	0.31204
-4.23136	-0.613938	0.239643	0.967606	0.565951	0.929045	-0.777165	0.100259	0.331705	-0.0687632	0.325649	-0.172047	0.109306	0.127227	0.226411	0.31952	0.117997	-0.0861548	0.446801	-0.304755	0.420587	-0.891491	0.312151
-4.23088	-0.613734	0.24057	0.967446	0.565915	0.930104	-0.776686	0.10085	0.331486	-0.0682167	0.325823	-0.171862	0.108747	0.127483	0.226318	0.319441	0.118971	-0.0858494	0.447081	-0.304847	0.420759	-0.890216	0.312125
-4.2304	-0.613829	0.241323	0.96789	0.565709	0.931021	-0.776202	0.101806	0.331353	-0.0684078	0.326239	-0.171656	0.109084	0.127598	0.226416	0.320098	0.119812	-0.0858306	0.448011	-0.304796	0.420434	-0.88845	0.311797
-4.22992	-0.613456	0.24206	0.968234	0.566323	0.931722	-0.775642	0.102978	0.331382	-0.0679124	0.326713	-0.170799	0.109238	0.127737	0.226527	0.320746	0.120461	-0.0853703	0.448597	-0.304825	0.420148	-0.886488	0.31215
-4.22944	-0.61333	0.242681	0.968669	0.566547	0.932299	-0.775733	0.103577	0.33155	-0.0675835	0.326756	-0.171487	0.108814	0.127977	0.22679	0.321386	0.121461	-0.0851284	0.448953	-0.304769	0.420138	-0.885711	0.312328
-4.22896	-0.613446	0.243653	0.968286	0.567355	0.932617	-0.774607	0.10379	0.331667	-0.0675428	0.326505	-0.170457	0.108274	0.128142	0.227134	0.321438	0.1226	-0.0844958	0.449792	-0.30495	0.419736	-0.884562	0.31195
-4.22848	-0.613714	0.244562	0.968208	0.567873	0.933243	-0.7739	0.104154	0.331831	-0.0665028	0.32701	-0.171203	0.108145	0.128465	0.227304	0.322546	0.123238	-0.0840221	0.449901	-0.304631	0.419698	-0.883577	0.311591
-4.228	-0.613376	0.245339	0.968498	0.567477	0.934143	-0.773272	0.104278	0.331975	-0.0656129	0.32714	-0.171032	0.10835	0.128615	0.227862	0.323485	0.124463	-0.0836201	0.450412	-0.304754	0.420036	-0.882715	0.311059
-4.22752	-0.612764	0.246045	0.968764	0.567249	0.935375	-0.774388	0.104564	0.331901	-0.0656286	0.327735	-0.171192	0.107997	0.128851	0.227996	0.32392	0.124884	-0.0834264	0.450786	-0.304843	0.420355	-0.881768	0.310681
-4.22704	-0.611601	0.246593	0.969047	0.568076	0.93658	-0.77419	0.104986	0.331978	-0.0651275	0.328097	-0.169774	0.108088	0.12882	0.228681	0.324046	0.125946	-0.0832386	0.450729	-0.304852	0.420523	-0.881571	0.310953
-4.22656	-0.611405	0.247622	0.969239	0.568784	0.937771	-0.774004	0.106039	0.332127	-0.0642072	0.328346	-0.169398	0.107444	0.129071	0.229035	0.32405	0.126557	-0.0830017	0.451179	-0.304908	0.420431	-0.881278	0.31111
-4.22608	-0.609855	0.248283	0.969088	0.568101	0.938619	-0.773911	0.106196	0.332225	-0.0636213	0.328989	-0.169077	0.107135	0.129431	0.228993	0.324126	0.127203	-0.0826202	0.451424	-0.30473	0.420299	-0.879672	0.311172
-4.2256	-0.609491	0.249576	0.969702	0.568333	0.938974	-0.774139	0.106557	0.332523	-0.0638889	0.329033	-0.168379	0.106555	0.129803	0.22928	0.324411	0.128046	-0.0822845	0.451803	-0.304531	0.420391	-0.879582	0.311059
-4.22512	-0.608516	0.250063	0.969749	0.568051	0.940282	-0.774571	0.106715	0.332589	-0.0635969	0.329772	-0.168767	0.106086	0.129963	0.229683	0.324077	0.128622	-0.0821104	0.451886	-0.30441	0.420278	-0.879047	0.31058
-4.22464	-0.608346	0.250332	0.970002	0.567993	0.941444	-0.775043	0.107139	0.33253	-0.0636179	0.329639	-0.16859	0.105737	0.130299	0.22991	0.323979	0.129027	-0.0816635	0.452128	-0.304321	0.420143	-0.878459	0.310702
-4.22416	-0.607599	0.251245	0.970017	0.56699	0.942441	-0.774871	0.107749	0.332519	-0.0631778	0.329665	-0.16909	0.10553	0.130808	0.230103	0.324335	0.129362	-0.0813569	0.452125	-0.303993	0.420085	-0.877348	0.310591
-4.22368	-0.607062	0.251853	0.970423	0.567143	0.943369	-0.775131	0.107958	0.33259	-0.0625546	0.329997	-0.168767	0.105433	0.130859	0.230101	0.32475	0.130269	-0.0810506	0.452439	-0.304082	0.420019	-0.876876	0.310602
-4.2232	-0.606365	0.253279	0.969608	0.56679	0.944161	-0.774445	0.109072	0.332602	-0.0623854	0.330417	-0.1693	0.105087	0.131193	0.230058	0.324495	0.13081	-0.0804364	0.452615	-0.303842	0.420123	-0.875707	0.310435
-4.22272	-0.605969	0.253837	0.969637	0.566791	0.94456	-0.773666	0.109124	0.332838	-0.0620299	0.330582	-0.169622	0.10469	0.131585	0.230046	0.324455	0.131093	-0.0801471	0.45309	-0.303564	0.41989	-0.875743	0.310364
-4.22224	-0.605532	0.254433	0.969369	0.566601	0.945481	-0.773297	0.109208	0.333169	-0.0617455	0.330755	-0.171546	0.104343	0.131981	0.229661	0.324924	0.131237	-0.0797882	0.452995	-0.303824	0.420169	-0.87542	0.310602
-4.22176	-0.605003	0.254881	0.969628	0.566625	0.946407	-0.773405	0.109612	0.333054	-0.0614595	0.330902	-0.172538	0.104116	0.132526	0.230121	0.324685	0.131195	-0.0796724	0.453222	-0.303754	0.420358	-0.875394	0.310358
-4.22128	-0.603997	0.255177	0.970154	0.56641	0.94672	-0.772014	0.109882	0.333046	-0.0614544	0.331294	-0.173199	0.103577	0.132843	0.230422	0.324999	0.131956	-0.0793755	0.453448	-0.303819	0.420134	-0.874856	0.309927
-4.2208	-0.603979	0.255724	0.970295	0.566435	0.947523	-0.772487	0.10996	0.333031	-0.0612746	0.332106	-0.173753	0.103039	0.132703	0.230877	0.325369	0.132128	-0.0789878	0.453872	-0.304031	0.420188	-0.874705	0.309911
-4.22032	-0.604404	0.256227	0.970091	0.567035	0.948296	-0.772118	0.110159	0.333163	-0.0607194	0.332535	-0.175353	0.102502	0.132709	0.230968	0.326201	0.133112	-0.0786799	0.454051	-0.304135	0.42029	-0.874227	0.30955
-4.21984	-0.604284	0.256504	0.970169	0.566762	0.949368	-0.772455	0.110426	0.333168	-0.060052	0.333071	-0.176624	0.102272	0.132674	0.230906	0.326545	0.13375	-0.0784144	0.454227	-0.304069	0.42052	-0.873276	0.309319
-4.21936	-0.604194	0.257005	0.970421	0.566179	0.950502	-0.772734	0.110247	0.333385	-0.0596994	0.333474	-0.176128	0.10225	0.132735	0.230777	0.326586	0.13477	-0.0780583	0.454561	-0.304306	0.420723	-0.873357	0.30906
-4.21888	-0.603899	0.257682	0.970847	0.565963	0.951335	-0.772221	0.110864	0.33329	-0.0593368	0.333678	-0.177389	0.102514	0.13291	0.231156	0.326518	0.135005	-0.0774759	0.454938	-0.304306	0.420762	-0.87245	0.308763
-4.2184	-0.603614	0.257359	0.971018	0.565326	0.951931	-0.772092	0.110837	0.332976	-0.0595612	0.334096	-0.178224	0.101986	0.132857	0.231273	0.326809	0.135634	-0.0769901	0.455358	-0.304433	0.420724	-0.872705	0.308365
-4.21792	-0.603396	0.25777	0.970599	0.564233	0.952842	-0.772426	0.111362	0.332897	-0.0595518	0.334261	-0.178412	0.101299	0.132801	0.231154	0.327146	0.136513	-0.0765369	0.455893	-0.304615	0.420629	-0.872664	0.308482
-4.21744	-0.602791	0.257566	0.970571	0.562915	0.953449	-0.771734	0.11199	0.332955	-0.0598188	0.334507	-0.178818	0.100489	0.133178	0.231467	0.327133	0.136367	-0.0759511	0.456261	-0.304955	0.420858	-0.872308	0.308521
-4.21696	-0.603464	0.257276	0.970421	0.563254	0.954247	-0.76997	0.112262	0.332913	-0.0594943	0.335138	-0.178839	0.100274	0.133291	0.231689	0.3273	0.136679	-0.0756143	0.456403	-0.305147	0.42085	-0.871395	0.308395
-4.21648	-0.603204	0.257462	0.96948	0.561905	0.954901	-0.769773	0.112793	0.332915	-0.0594548	0.335661	-0.179754	0.101026	0.133416	0.231636	0.326744	0.13678	-0.0752054	0.456668	-0.305345	0.421042	-0.870821	0.308186
-4.216	-0.602392	0.257959	0.968786	0.560962	0.954969	-0.769455	0.11362	0.332814	-0.0587577	0.336369	-0.180865	0.101012	0.133663	0.232443	0.326835	0.13716	-0.0745819	0.457013	-0.305532	0.420765	-0.870253	0.308012
-4.21552	-0.601972	0.258507	0.967717	0.560723	0.955619	-0.769455	0.114144	0.332832	-0.0585823	0.337306	-0.180897	0.10043	0.134098	0.232693	0.326724	0.13825	-0.0741481	0.457094	-0.305608	0.420614	-0.870783	0.307491
-4.21504	-0.601975	0.258983	0.967581	0.560129	0.955963	-0.768567	0.11492	0.332575	-0.0580214	0.338219	-0.181641	0.100307	0.134252	0.23241	0.326544	0.138626	-0.0739435	0.457273	-0.305595	0.420562	-0.87049	0.307425
-4.21456	-0.602261	0.2594	0.966261	0.558967	0.956501	-0.768119	0.114999	0.33258	-0.0576364	0.338562	-0.181959	0.0997804	0.134507	0.233121	0.326641	0.138989	-0.0736486	0.457961	-0.305737	0.420698	-0.869629	0.307563
-4.21408	-0.602065	0.259706	0.965344	0.558244	0.957293	-0.768903	0.115259	0.33236	-0.0576288	0.339322	-0.181892	0.0995851	0.135099	0.233563	0.327056	0.139831	-0.0733181	0.458119	-0.306194	0.420536	-0.8684	0.307448
-4.2136	-0.601584	0.260002	0.96426	0.557457	0.957638	-0.770302	0.11526	0.332423	-0.0569885	0.339741	-0.182911	0.0989381	0.135987	0.233711	0.32651	0.139963	-0.0730866	0.458325	-0.306235	0.420424	-0.867585	0.30715
-4.21312	-0.601292	0.26026	0.963518	0.557114	0.958014	-0.769939	0.116148	0.332406	-0.0561747	0.340265	-0.183037	0.0984874	0.136372	0.233578	0.326132	0.14034	-0.0730574	0.458473	-0.306367	0.420483	-0.867005	0.30666
-4.21264	-0.601416	0.26113	0.962708	0.55707	0.958202	-0.770431	0.116858	0.332273	-0.0562239	0.340657	-0.182522	0.0981535	0.136594	0.233814	0.326676	0.140264	-0.0727718	0.458486	-0.306407	0.420275	-0.866472	0.306425
-4.21216	-0.600896	0.261943	0.961811	0.556389	0.958104	-0.768689	0.11746	0.332246	-0.0557872	0.341348	-0.182837	0.0978546	0.136641	0.233956	0.32644	0.140716	-0.0726076	0.458732	-0.306711	0.420241	-0.865737	0.306325
-4.21168	-0.600868	0.262026	0.961609	0.555558	0.958652	-0.768639	0.117806	0.332064	-0.0557054	0.341497	-0.182466	0.0974955	0.136806	0.234259	0.326149	0.14072	-0.0723238	0.458822	-0.306774	0.420183	-0.865556	0.3064
-4.2112	-0.600106	0.262604	0.96068	0.555627	0.958795	-0.767054	0.117814	0.332021	-0.0556271	0.341533	-0.18288	0.0973191	0.137183	0.234625	0.326613	0.141208	-0.0720835	0.458882	-0.306533	0.420257	-0.864856	0.306185
-4.21072	-0.599837	0.263365	0.96052	0.554336	0.959187	-0.766616	0.118657	0.332015	-0.0545177	0.342	-0.182625	0.0969091	0.137633	0.234843	0.327256	0.141713	-0.0719686	0.458838	-0.306611	0.419999	-0.863968	0.306073
-4.21024	-0.599063	0.263376	0.96033	0.553141	0.958902	-0.766499	0.119446	0.331845	-0.0544837	0.3419	-0.183113	0.0967494	0.137828	0.23549	0.327155	0.14227	-0.0720728	0.459281	-0.306581	0.420244	-0.863163	0.306166
-4.20976	-0.598329	0.263945	0.959578	0.552028	0.959252	-0.767259	0.119477	0.331821	-0.0545762	0.341682	-0.183986	0.0966037	0.138277	0.235853	0.326851	0.142135	-0.0718746	0.459561	-0.306724	0.420224	-0.863026	0.305796
-4.20928	-0.597609	0.264672	0.959631	0.550866	0.959408	-0.767122	0.120383	0.331875	-0.0536208	0.342405	-0.18383	0.0959957	0.138435	0.236067	0.326195	0.142489	-0.0717035	0.460388	-0.306942	0.42039	-0.862348	0.305469
-4.2088	-0.596597	0.264552	0.959627	0.550164	0.960134	-0.766351	0.121325	0.332044	-0.053526	0.342223	-0.184497	0.0960766	0.138756	0.236104	0.326325	0.142168	-0.0716917	0.46059	-0.307026	0.420619	-0.861816	0.305269
-4.20832	-0.595669	0.264688	0.959172	0.549606	0.96052	-0.766289	0.12178	0.331955	-0.0530359	0.342886	-0.184439	0.0959302	0.139217	0.236023	0.326101	0.142661	-0.071251	0.460517	-0.307093	0.420693	-0.861879	0.305326
-4.20784	-0.594837	0.26482	0.958259	0.549036	0.960627	-0.766706	0.121975	0.331985	-0.0533713	0.343601	-0.185065	0.0962741	0.139714	0.236364	0.326418	0.143134	-0.0709228	0.460476	-0.307282	0.420888	-0.861461	0.305301
-4.20736	-0.594947	0.264888	0.957599	0.548331	0.96076	-0.766166	0.122847	0.331784	-0.0528761	0.34357	-0.185473	0.0958208	0.140352	0.236755	0.326547	0.143875	-0.0707942	0.460803	-0.307299	0.421116	-0.861222	0.305424
-4.20688	-0.593791	0.265483	0.95736	0.547356	0.960858	-0.765081	0.12367	0.331888	-0.0524672	0.344042	-0.186351	0.0950216	0.140821	0.237287	0.326404	0.14404	-0.0705184	0.461238	-0.307353	0.421131	-0.861043	0.305412
-4.2064	-0.593172	0.265974	0.957388	0.546903	0.961074	-0.76417	0.124033	0.331808	-0.0524653	0.344245	-0.187336	0.094895	0.141258	0.237556	0.32622	0.144405	-0.0706786	0.461494	-0.307255	0.421293	-0.860207	0.305181
-4.20592	-0.592921	0.266208	0.957207	0.546381	0.96151	-0.763083	0.124631	0.331718	-0.0528146	0.345078	-0.188226	0.0946829	0.14176	0.23753	0.326554	0.144478	-0.070879	0.461808	-0.307336	0.421322	-0.860372	0.305236
-4.20544	-0.593055	0.266636	0.956249	0.545786	0.962213	-0.764203	0.125459	0.331826	-0.0533101	0.345469	-0.18839	0.0952159	0.142212	0.2373	0.326363	0.144651	-0.070533	0.461938	-0.307594	0.421273	-0.860764	0.305215
-4.20496	-0.593297	0.266792	0.956028	0.545217	0.962605	-0.763307	0.125913	0.331794	-0.0528652	0.345463	-0.187975	0.0944381	0.142729	0.238134	0.326287	0.144823	-0.0705218	0.462213	-0.307667	0.421493	-0.860001	0.305325
-4.20448	-0.592853	0.267193	0.955648	0.544597	0.963698	-0.762798	0.126483	0.332186	-0.053209	0.346045	-0.188688	0.0941699	0.143267	0.23798	0.325878	0.14489	-0.0703305	0.462709	-0.30778	0.421641	-0.85949	0.30531
-4.204	-0.592253	0.26788	0.954938	0.544171	0.964022	-0.762087	0.127169	0.33227	-0.053565	0.346794	-0.187948	0.0936759	0.143915	0.237547	0.326049	0.145724	-0.0702443	0.46267	-0.307692	0.421888	-0.858968	0.305396
-4.20352	-0.591723	0.267924	0.955396	0.543697	0.964454	-0.76031	0.128064	0.332122	-0.0538815	0.347458	-0.186271	0.0938485	0.144405	0.237368	0.325755	0.146278	-0.0702277	0.462799	-0.307734	0.421958	-0.858191	0.305657
-4.20304	-0.591219	0.267861	0.954895	0.543424	0.965025	-0.760074	0.128767	0.331862	-0.0545706	0.348295	-0.185193	0.0937208	0.144673	0.237361	0.325274	0.146764	-0.0701001	0.463066	-0.307635	0.422044	-0.857523	0.305723
-4.20256	-0.59069	0.268362	0.954421	0.542213	0.966421	-0.759933	0.129185	0.331789	-0.0552306	0.349096	-0.184022	0.0934084	0.144967	0.237575	0.324791	0.146959	-0.0700565	0.463578	-0.307626	0.422189	-0.856805	0.305638
-4.20208	-0.591469	0.268648	0.954312	0.542091	0.967057	-0.760164	0.130204	0.331698	-0.0557899	0.349863	-0.182852	0.0937331	0.14538	0.237628	0.325059	0.147183	-0.0699044	0.463688	-0.307764	0.422437	-0.856203	0.305993
-4.2016	-0.590926	0.268678	0.953581	0.541287	0.967768	-0.759347	0.130681	0.331798	-0.0564921	0.350836	-0.181196	0.0937769	0.145712	0.237678	0.325462	0.147365	-0.0696006	0.463748	-0.307664	0.422351	-0.855766	0.306316
-4.20112	-0.589305	0.268482	0.953521	0.541119	0.96843	-0.758809	0.131013	0.331711	-0.0567036	0.35113	-0.180921	0.0935742	0.146223	0.237696	0.325979	0.147235	-0.0695256	0.464032	-0.30763	0.422497	-0.854978	0.306522
-4.20064	-0.589254	0.268985	0.953335	0.541793	0.969052	-0.758401	0.1321	0.331579	-0.0566525	0.351421	-0.180336	0.0933164	0.146461	0.237485	0.326184	0.147423	-0.069471	0.464063	-0.307521	0.422516	-0.854458	0.306946
-4.20016	-0.588722	0.269264	0.953532	0.541193	0.97023	-0.757665	0.132583	0.33147	-0.0570167	0.351684	-0.179689	0.0927055	0.146221	0.237536	0.32613	0.147833	-0.0691752	0.464385	-0.307475	0.423186	-0.853971	0.307088
-4.19968	-0.588769	0.269568	0.953991	0.541234	0.971099	-0.757251	0.133485	0.331509	-0.0580207	0.352314	-0.178563	0.0929358	0.14686	0.237667	0.326391	0.148122	-0.0690412	0.464678	-0.307448	0.423414	-0.854546	0.307219
-4.1992	-0.588356	0.270599	0.954104	0.540866	0.971462	-0.757591	0.133793	0.331393	-0.0581732	0.352773	-0.178866	0.0925502	0.147613	0.237712	0.326166	0.148071	-0.068891	0.464794	-0.307691	0.423418	-0.85401	0.307428
-4.19872	-0.588606	0.270605	0.955007	0.541171	0.972151	-0.75831	0.134684	0.331418	-0.0579901	0.35334	-0.177251	0.092426	0.148141	0.237963	0.326317	0.148402	-0.0688224	0.465034	-0.307723	0.423897	-0.853714	0.307943
-4.19824	-0.589117	0.27147	0.955813	0.541738	0.973005	-0.759281	0.135266	0.331406	-0.0581299	0.353885	-0.17653	0.0921576	0.148069	0.23821	0.326548	0.148874	-0.0684916	0.465269	-0.307617	0.423976	-0.853583	0.308057
-4.19776	-0.589707	0.27154	0.955146	0.542625	0.973695	-0.758396	0.135429	0.33141	-0.0581889	0.353861	-0.176298	0.0918976	0.148625	0.238259	0.326351	0.149155	-0.0679262	0.465371	-0.307322	0.424118	-0.853241	0.308351
-4.19728	-0.58964	0.271981	0.955624	0.542656	0.975114	-0.756988	0.136017	0.331132	-0.0583902	0.354456	-0.17512	0.0918384	0.148971	0.238304	0.326066	0.149689	-0.067904	0.465601	-0.307339	0.424609	-0.853232	0.308608
-4.1968	-0.590095	0.273023	0.955231	0.54167	0.976157	-0.756956	0.136839	0.331037	-0.05866	0.355141	-0.173348	0.0916774	0.148745	0.238411	0.326262	0.149495	-0.0679222	0.466042	-0.307306	0.424749	-0.853179	0.308934
-4.19632	-0.590838	0.273899	0.955565	0.541222	0.977526	-0.756324	0.137492	0.330778	-0.0583829	0.355558	-0.17343	0.0920945	0.148585	0.238677	0.3255	0.149814	-0.0675432	0.466027	-0.307234	0.424448	-0.853152	0.309249
-4.19584	-0.591207	0.27418	0.955367	0.54094	0.978075	-0.756776	0.137894	0.330652	-0.0586299	0.356729	-0.171941	0.091555	0.148424	0.23853	0.325774	0.150069	-0.0673567	0.466328	-0.30721	0.42446	-0.852949	0.309406
-4.19536	-0.591697	0.274412	0.956061	0.541175	0.978925	-0.755968	0.138432	0.330515	-0.0582836	0.357913	-0.170686	0.0922132	0.148189	0.23942	0.326463	0.150659	-0.0671441	0.466285	-0.306815	0.424736	-0.853043	0.309716
-4.19488	-0.591701	0.274823	0.955976	0.541428	0.979838	-0.755217	0.139195	0.330547	-0.0588713	0.358185	-0.170264	0.0926322	0.148325	0.240039	0.325905	0.150803	-0.0669831	0.466687	-0.306517	0.425181	-0.852844	0.310071
-4.1944	-0.591036	0.275251	0.956202	0.541399	0.980507	-0.755376	0.139744	0.330429	-0.0593478	0.358558	-0.169233	0.0920224	0.148147	0.240305	0.326302	0.151047	-0.0666474	0.466813	-0.306156	0.425443	-0.852775	0.310103
-4.19392	-0.591609	0.275643	0.956425	0.541153	0.981472	-0.755701	0.140513	0.330382	-0.0600149	0.359611	-0.167995	0.0917383	0.14797	0.241249	0.325101	0.151183	-0.0664956	0.467087	-0.30575	0.425559	-0.852393	0.310237
-4.19344	-0.590774	0.276216	0.955867	0.541503	0.98256	-0.75595	0.140388	0.330233	-0.0598046	0.360215	-0.1672	0.0914047	0.148131	0.241485	0.32506	0.151564	-0.066427	0.467238	-0.305545	0.425722	-0.85171	0.310316
-4.19296	-0.591399	0.276332	0.956158	0.540738	0.983655	-0.756067	0.140953	0.330004	-0.0601649	0.361502	-0.166177	0.0919788	0.148071	0.241964	0.325509	0.151747	-0.0660215	0.467556	-0.305422	0.425444	-0.851619	0.310675
-4.19248	-0.590472	0.27649	0.956313	0.539814	0.984443	-0.75611	0.140996	0.330245	-0.0603198	0.361676	-0.164899	0.0913843	0.148512	0.242122	0.326009	0.152767	-0.0655676	0.467616	-0.305304	0.424927	-0.851063	0.310794
-4.192	-0.590192	0.276472	0.957179	0.539049	0.985607	-0.75641	0.141575	0.330275	-0.0602344	0.362445	-0.164236	0.0913858	0.148693	0.242296	0.325906	0.153359	-0.0649028	0.468008	-0.305349	0.425318	-0.85054	0.310885
-4.19152	-0.590643	0.275916	0.957351	0.539284	0.986599	-0.756359	0.142489	0.330338	-0.0606056	0.363009	-0.162963	0.091544	0.148544	0.24198	0.325552	0.153401	-0.0646546	0.468189	-0.305155	0.425361	-0.850236	0.311217
-4.19104	-0.590686	0.275901	0.957632	0.538802	0.987435	-0.755698	0.142624	0.33032	-0.0605057	0.3643	-0.16281	0.0914001	0.148455	0.241973	0.325727	0.153699	-0.0641639	0.468649	-0.305264	0.42577	-0.849978	0.310793
-4.19056	-0.590864	0.275788	0.957606	0.538244	0.987897	-0.754568	0.142521	0.330264	-0.0608025	0.364732	-0.161787	0.0908465	0.148459	0.241955	0.325214	0.154202	-0.0639441	0.468789	-0.304929	0.425972	-0.849572	0.31089
-4.19008	-0.59046	0.276799	0.957156	0.538722	0.988506	-0.754562	0.14295	0.330293	-0.0607783	0.365162	-0.161226	0.0908746	0.148278	0.24238	0.325415	0.154544	-0.0637477	0.469219	-0.305033	0.426492	-0.849438	0.31129
-4.1896	-0.590678	0.276762	0.957166	0.539012	0.989316	-0.755654	0.143509	0.330677	-0.0606666	0.3657	-0.160892	0.0916391	0.148273	0.242521	0.325372	0.154763	-0.0634605	0.469584	-0.304837	0.426958	-0.849114	0.311377
-4.18912	-0.590277	0.276579	0.957067	0.539434	0.989693	-0.756241	0.143683	0.330723	-0.0604116	0.366066	-0.160331	0.0914061	0.148466	0.242592	0.325446	0.154787	-0.0632314	0.469698	-0.304663	0.42745	-0.849033	0.311545
-4.18864	-0.590746	0.276604	0.957011	0.54028	0.990315	-0.756594	0.144074	0.330712	-0.0593575	0.36649	-0.15833	0.0911088	0.148177	0.242701	0.325626	0.155273	-0.0631357	0.469923	-0.304783	0.427692	-0.848435	0.311701
-4.18816	-0.589487	0.276875	0.957716	0.540254	0.990927	-0.754847	0.145222	0.330928	-0.0590619	0.367389	-0.156024	0.0910969	0.148386	0.242909	0.325372	0.155534	-0.0628143	0.469911	-0.304713	0.427586	-0.848267	0.311724
-4.18768	-0.588815	0.27683	0.957579	0.541146	0.991404	-0.754027	0.145922	0.330993	-0.0589807	0.367997	-0.155933	0.0910589	0.148416	0.242894	0.32409	0.155982	-0.0627669	0.470152	-0.304791	0.427761	-0.848371	0.311512
-4.1872	-0.587998	0.276334	0.957553	0.54138	0.99184	-0.754906	0.146692	0.330995	-0.059361	0.368459	-0.156039	0.0918809	0.14861	0.24304	0.323327	0.155949	-0.062578	0.470486	-0.304783	0.428153	-0.848297	0.311305
-4.18672	-0.586744	0.276431	0.958041	0.542166	0.992367	-0.755409	0.146704	0.331055	-0.0589639	0.369183	-0.154271	0.0919298	0.148447	0.243169	0.322477	0.156522	-0.0627141	0.470712	-0.30464	0.428361	-0.84841	0.311081
-4.18624	-0.586237	0.275935	0.957838	0.541825	0.992751	-0.755287	0.147398	0.331162	-0.059017	0.369118	-0.153907	0.0919699	0.148248	0.243367	0.322415	0.156382	-0.0625593	0.471095	-0.304714	0.428213	-0.84709	0.311264
-4.18576	-0.586426	0.276148	0.958058	0.542087	0.99353	-0.753907	0.148068	0.331154	-0.0589395	0.369745	-0.152938	0.0915675	0.148246	0.243681	0.323109	0.157028	-0.0623079	0.471166	-0.30464	0.42837	-0.847036	0.311271
-4.18528	-0.585892	0.276156	0.958611	0.542711	0.994171	-0.754521	0.147931	0.331095	-0.0587533	0.369895	-0.152319	0.0929448	0.147994	0.243996	0.323136	0.157447	-0.0620976	0.471424	-0.304232	0.428676	-0.846376	0.311333
-4.1848	-0.586251	0.276403	0.959298	0.541945	0.99492	-0.753257	0.147997	0.331343	-0.0587197	0.370587	-0.152798	0.0932786	0.147749	0.244896	0.323143	0.158476	-0.0620408	0.471622	-0.30408	0.428699	-0.845263	0.311052
-4.18432	-0.58591	0.276165	0.959409	0.542359	0.995475	-0.754108	0.148621	0.331184	-0.0588477	0.371428	-0.151457	0.0930991	0.147671	0.245384	0.323333	0.158921	-0.0620009	0.471985	-0.303854	0.429099	-0.844472	0.311162
-4.18384	-0.586238	0.274908	0.959587	0.542511	0.995797	-0.755336	0.148423	0.331399	-0.0597856	0.371844	-0.150242	0.0934259	0.147481	0.245676	0.323321	0.159199	-0.0619243	0.472576	-0.303481	0.429182	-0.844455	0.311385
-4.18336	-0.586753	0.274749	0.959789	0.542767	0.99599	-0.755582	0.148874	0.331497	-0.0597279	0.372954	-0.14966	0.0936819	0.147397	0.245739	0.323591	0.159501	-0.0615875	0.472942	-0.30313	0.429477	-0.844171	0.311393
-4.18288	-0.586855	0.274723	0.960458	0.543026	0.996524	-0.755508	0.14967	0.331593	-0.0597552	0.373771	-0.149678	0.0941621	0.147463	0.245689	0.32403	0.159219	-0.0616326	0.47252	-0.302759	0.429772	-0.844097	0.311652
-4.1824	-0.587064	0.274801	0.960191	0.543094	0.996782	-0.75541	0.149397	0.331424	-0.0591893	0.374336	-0.148721	0.0943086	0.147355	0.245601	0.323792	0.159796	-0.0618119	0.472521	-0.30248	0.429942	-0.843265	0.311714
-4.18192	-0.587101	0.274961	0.960366	0.541847	0.997797	-0.75632	0.149856	0.3315	-0.0583857	0.375291	-0.149847	0.0947243	0.146977	0.245344	0.324041	0.160774	-0.061603	0.472794	-0.302684	0.430345	-0.843464	0.311682
-4.18144	-0.587916	0.275527	0.96021	0.542529	0.998558	-0.757335	0.151173	0.331315	-0.0582711	0.376166	-0.14887	0.094825	0.147265	0.244912	0.32459	0.160898	-0.0618647	0.472591	-0.302629	0.430424	-0.84353	0.312132
-4.18096	-0.587808	0.275728	0.960154	0.543054	0.998381	-0.757642	0.150855	0.331204	-0.0580774	0.37736	-0.148545	0.0947561	0.146838	0.244736	0.324645	0.160995	-0.0618477	0.472953	-0.30248	0.430246	-0.843293	0.312355
-4.18048	-0.588905	0.275908	0.960564	0.54324	0.998684	-0.758415	0.151155	0.331384	-0.0583811	0.377954	-0.148829	0.0954165	0.14691	0.244674	0.324409	0.161764	-0.0618691	0.473078	-0.30226	0.43075	-0.843147	0.31278
-4.18	-0.588912	0.27578	0.961226	0.543059	0.999377	-0.757394	0.150822	0.33142	-0.0588616	0.378634	-0.14821	0.0960096	0.146124	0.244916	0.32416	0.161951	-0.0620662	0.473096	-0.302288	0.430829	-0.842751	0.31275
-4.17952	-0.588395	0.276507	0.961478	0.543315	1.00013	-0.756888	0.151759	0.331625	-0.0588197	0.379537	-0.147934	0.0961781	0.14579	0.244853	0.32385	0.161867	-0.0619552	0.473427	-0.302394	0.431396	-0.842319	0.313211
-4.17904	-0.588667	0.276781	0.962033	0.542466	0.999971	-0.75633	0.151564	0.331793	-0.0580239	0.381086	-0.146825	0.0962242	0.145318	0.245146	0.323967	0.162067	-0.0618701	0.473601	-0.302472	0.431622	-0.841407	0.313211
-4.17856	-0.589741	0.277203	0.962594	0.543458	1.00082	-0.755961	0.151256	0.331873	-0.0580034	0.381973	-0.145826	0.0970588	0.145159	0.245293	0.324476	0.162685	-0.0617839	0.473926	-0.302218	0.431143	-0.840902	0.313102
-4.17808	-0.589505	0.277502	0.962806	0.542462	1.00151	-0.755019	0.151488	0.331813	-0.0575074	0.382752	-0.145124	0.0976783	0.145004	0.245819	0.324392	0.162634	-0.0618627	0.47439	-0.302129	0.430964	-0.840666	0.313443
-4.1776	-0.588906	0.277689	0.962842	0.542018	1.00222	-0.755024	0.151858	0.331698	-0.0580368	0.383824	-0.143937	0.0984179	0.14463	0.245709	0.323932	0.162406	-0.0618609	0.474653	-0.301994	0.430902	-0.840252	0.313643
-4.17712	-0.588756	0.277682	0.963202	0.541637	1.0037	-0.755634	0.152754	0.33166	-0.0586178	0.384311	-0.143513	0.0982505	0.144918	0.245944	0.323844	0.162809	-0.0620364	0.474623	-0.30192	0.431033	-0.84019	0.313815
-4.17664	-0.588588	0.277625	0.963651	0.541613	1.00446	-0.755376	0.153863	0.331615	-0.0584184	0.384815	-0.141871	0.0985421	0.145321	0.246048	0.324119	0.163159	-0.0622253	0.47491	-0.301817	0.431058	-0.839701	0.313948
-4.17616	-0.588942	0.27807	0.963913	0.541498	1.00488	-0.755329	0.153517	0.331674	-0.0582496	0.385253	-0.14065	0.098446	0.145503	0.246076	0.324754	0.164055	-0.0624581	0.475451	-0.301818	0.430876	-0.839617	0.314129
-4.17568	-0.588651	0.278429	0.964525	0.541148	1.00582	-0.755899	0.153781	0.331532	-0.0577236	0.386154	-0.139123	0.0987852	0.145245	0.246416	0.325085	0.164427	-0.0625324	0.475887	-0.301834	0.430612	-0.839237	0.314496
-4.1752	-0.587685	0.278363	0.964898	0.540308	1.00646	-0.754715	0.152964	0.331521	-0.0584404	0.386863	-0.138061	0.0985823	0.145453	0.245897	0.324371	0.164768	-0.0624343	0.475953	-0.301847	0.430771	-0.839406	0.31437
-4.17472	-0.588277	0.278224	0.964524	0.541085	1.00711	-0.754301	0.153085	0.33154	-0.0579918	0.387464	-0.136789	0.0989829	0.145435	0.245366	0.324604	0.165255	-0.0624277	0.476168	-0.301882	0.430548	-0.838953	0.314763
-4.17424	-0.587556	0.278446	0.964958	0.540051	1.00783	-0.754081	0.153002	0.331621	-0.0572838	0.388659	-0.135857	0.0986741	0.145621	0.244638	0.324677	0.16583	-0.0625289	0.476322	-0.302006	0.430024	-0.838873	0.31521
-4.17376	-0.587846	0.278685	0.965762	0.538753	1.00824	-0.754879	0.153301	0.33164	-0.0571888	0.389571	-0.134597	0.0984959	0.145521	0.243903	0.324332	0.165776	-0.0624406	0.476132	-0.302086	0.429707	-0.838646	0.315461
-4.17328	-0.587712	0.279232	0.966305	0.538896	1.00894	-0.754612	0.153539	0.331768	-0.0573061	0.390183	-0.134314	0.0988114	0.145197	0.243496	0.324199	0.166339	-0.0623958	0.476195	-0.302321	0.429533	-0.838426	0.315918
-4.1728	-0.58719	0.279551	0.965899	0.538383	1.00943	-0.753928	0.153444	0.331768	-0.0571716	0.390729	-0.133231	0.0992219	0.145343	0.243453	0.323627	0.166861	-0.0625361	0.476436	-0.302256	0.429673	-0.838399	0.316482
-4.17232	-0.587249	0.280169	0.966115	0.537353	1.00975	-0.752239	0.153778	0.331639	-0.0561285	0.391276	-0.132603	0.0991	0.145538	0.243404	0.3244	0.167466	-0.0624331	0.476726	-0.302298	0.429878	-0.837716	0.316792
-4.17184	-0.589085	0.280187	0.965948	0.537865	1.01035	-0.751913	0.15412	0.331641	-0.0556637	0.391893	-0.132821	0.0994414	0.145756	0.243559	0.324337	0.167769	-0.0624951	0.476654	-0.302352	0.429726	-0.837144	0.316879
-4.17136	-0.589599	0.28032	0.96675	0.538371	1.01143	-0.751388	0.15484	0.331599	-0.0553013	0.392078	-0.131529	0.0995514	0.145729	0.243465	0.323565	0.168586	-0.0626844	0.477488	-0.302525	0.42973	-0.836978	0.3173
-4.17088	-0.588735	0.280348	0.966462	0.538579	1.01173	-0.751474	0.154941	0.331806	-0.0548944	0.39269	-0.130684	0.099274	0.145624	0.243798	0.323299	0.168843	-0.0628743	0.477915	-0.302634	0.429946	-0.836912	0.317602
-4.1704	-0.588748	0.280515	0.967086	0.539125	1.01179	-0.752027	0.155105	0.331856	-0.0551036	0.393636	-0.129405	0.0999507	0.145621	0.243931	0.323176	0.168784	-0.0627217	0.478102	-0.302665	0.430206	-0.836409	0.318023
-4.16992	-0.589629	0.280453	0.967887	0.538638	1.01174	-0.751473	0.15496	0.331671	-0.0543782	0.394404	-0.128811	0.100065	0.146053	0.243379	0.323559	0.16962	-0.0628366	0.478216	-0.30271	0.430562	-0.836298	0.318632
-4.16944	-0.59031	0.280458	0.967929	0.539746	1.01221	-0.750826	0.155091	0.331494	-0.0536458	0.39492	-0.128482	0.10062	0.146261	0.24375	0.3239	0.170357	-0.0627043	0.47819	-0.302795	0.430593	-0.835616	0.318962
-4.16896	-0.590898	0.280656	0.968284	0.540939	1.01277	-0.75105	0.155139	0.331521	-0.0523479	0.395688	-0.127398	0.100974	0.146256	0.244171	0.323627	0.170694	-0.0629634	0.478263	-0.302639	0.43101	-0.835117	0.31913
-4.16848	-0.591533	0.28078	0.968144	0.541264	1.01388	-0.750978	0.155493	0.331466	-0.0516665	0.396572	-0.125668	0.101442	0.146582	0.244108	0.32373	0.1716	-0.0628334	0.478242	-0.302445	0.430826	-0.833939	0.319234
-4.168	-0.591182	0.280843	0.968514	0.542586	1.01473	-0.750697	0.155131	0.331534	-0.0516286	0.397106	-0.12394	0.101908	0.147228	0.243969	0.323395	0.171401	-0.0627842	0.478152	-0.302393	0.430503	-0.833329	0.31945
-4.16752	-0.590934	0.281518	0.968441	0.543747	1.01483	-0.749642	0.155503	0.331494	-0.051055	0.397723	-0.121783	0.102342	0.147214	0.243849	0.323112	0.171668	-0.0625895	0.478404	-0.301946	0.430404	-0.832934	0.319498
-4.16704	-0.591559	0.281587	0.968785	0.54241	1.01539	-0.75005	0.155661	0.331296	-0.0508069	0.39835	-0.121423	0.102416	0.147089	0.243763	0.323454	0.171958	-0.0626648	0.478351	-0.301935	0.430272	-0.832275	0.319805
-4.16656	-0.592275	0.281454	0.96827	0.542995	1.01649	-0.749325	0.155989	0.331162	-0.0499697	0.399384	-0.121099	0.1027	0.147886	0.244115	0.323561	0.173098	-0.0626591	0.478742	-0.302	0.430345	-0.831433	0.320033
-4.16608	-0.593193	0.28139	0.968699	0.543028	1.01701	-0.748211	0.156363	0.33102	-0.0494156	0.400125	-0.120797	0.103508	0.148247	0.244254	0.324072	0.172987	-0.0624278	0.478862	-0.30205	0.430602	-0.830922	0.320084
-4.1656	-0.593064	0.281307	0.968912	0.543236	1.01762	-0.747573	0.157277	0.331131	-0.0486573	0.400635	-0.119991	0.103392	0.14866	0.243782	0.324606	0.173098	-0.0622342	0.478995	-0.301881	0.430754	-0.830765	0.320501
-4.16512	-0.593614	0.280953	0.969288	0.543465	1.01861	-0.745498	0.157411	0.331141	-0.0479784	0.401481	-0.11871	0.103179	0.149412	0.24379	0.324867	0.173399	-0.0619837	0.479192	-0.302005	0.431196	-0.830436	0.320543
-4.16464	-0.594272	0.280764	0.969769	0.543702	1.01923	-0.746642	0.157736	0.330883	-0.0478642	0.402449	-0.117043	0.103234	0.149779	0.243839	0.325055	0.174164	-0.0619144	0.479167	-0.301884	0.431472	-0.829647	0.320592
-4.16416	-0.594392	0.280515	0.969586	0.543715	1.01959	-0.746319	0.158106	0.330936	-0.0479376	0.403104	-0.11584	0.103052	0.149975	0.24416	0.325436	0.174995	-0.06164	0.479113	-0.301751	0.431761	-0.828985	0.320411
-4.16368	-0.594783	0.280797	0.970489	0.543645	1.01999	-0.746163	0.158515	0.330957	-0.0471723	0.403835	-0.114452	0.103223	0.15074	0.244722	0.325188	0.175717	-0.0614731	0.47901	-0.301829	0.431954	-0.8291	0.32038
-4.1632	-0.596396	0.281141	0.970423	0.543725	1.02011	-0.74494	0.158955	0.330782	-0.0467448	0.404537	-0.11341	0.102685	0.151009	0.244784	0.324605	0.176606	-0.061088	0.479011	-0.301549	0.431991	-0.828847	0.320092
-4.16272	-0.597202	0.28077	0.970587	0.54459	1.02101	-0.744068	0.160031	0.330818	-0.0465915	0.405159	-0.112622	0.10224	0.150996	0.244641	0.325061	0.177298	-0.0608562	0.478954	-0.301632	0.432212	-0.827826	0.320022
-4.16224	-0.597846	0.280498	0.971174	0.544978	1.02179	-0.744426	0.160468	0.330897	-0.0459297	0.405639	-0.111914	0.102881	0.151097	0.244796	0.3255	0.177518	-0.0606941	0.478957	-0.301596	0.432316	-0.827653	0.319961
-4.16176	-0.59815	0.280159	0.971416	0.544621	1.02253	-0.744541	0.161782	0.33084	-0.0454477	0.406278	-0.110766	0.10215	0.151059	0.245423	0.32538	0.177908	-0.0606435	0.479125	-0.301465	0.432372	-0.827239	0.320315
-4.16128	-0.598785	0.279976	0.972466	0.545531	1.02314	-0.743825	0.161793	0.330867	-0.0454405	0.406692	-0.109699	0.101474	0.151441	0.246427	0.325398	0.17765	-0.060606	0.478926	-0.301351	0.432151	-0.827293	0.320605
-4.1608	-0.598628	0.280086	0.97265	0.545458	1.0238	-0.743575	0.161694	0.330708	-0.0452217	0.406952	-0.109221	0.101363	0.151678	0.246504	0.325552	0.177836	-0.0605948	0.479237	-0.301149	0.432005	-0.826594	0.320947
-4.16032	-0.598811	0.27991	0.972938	0.545222	1.02435	-0.744093	0.162099	0.330749	-0.0452041	0.407241	-0.109549	0.101278	0.151897	0.246785	0.325256	0.177989	-0.0606281	0.479471	-0.301007	0.431904	-0.826229	0.320895
-4.15984	-0.600108	0.279929	0.972885	0.545455	1.0244	-0.744149	0.162567	0.330622	-0.0454339	0.407678	-0.108865	0.101254	0.152178	0.247346	0.325516	0.178601	-0.060423	0.479564	-0.300996	0.431541	-0.826749	0.32126
-4.15936	-0.600497	0.279989	0.972564	0.544742	1.02495	-0.744709	0.16343	0.330454	-0.0456758	0.40775	-0.108312	0.101264	0.152553	0.247502	0.325541	0.17919	-0.0602977	0.479823	-0.30108	0.431501	-0.826076	0.321283
-4.15888	-0.601191	0.280052	0.973004	0.544354	1.02535	-0.745416	0.163986	0.330231	-0.0458826	0.408466	-0.107962	0.101193	0.152619	0.247881	0.326228	0.179346	-0.0599555	0.480027	-0.300754	0.431675	-0.825511	0.321235
-4.1584	-0.601299	0.280287	0.973072	0.544284	1.02594	-0.74543	0.164167	0.330153	-0.0464334	0.408662	-0.107772	0.10105	0.152856	0.24836	0.326338	0.179856	-0.0593522	0.48011	-0.300782	0.431729	-0.824925	0.32155
-4.15792	-0.602432	0.280284	0.97324	0.543584	1.0262	-0.746356	0.164444	0.329723	-0.0462494	0.408898	-0.107604	0.100739	0.153182	0.248894	0.326579	0.180398	-0.0590727	0.480123	-0.30058	0.432047	-0.824178	0.321649
-4.15744	-0.603164	0.280061	0.972656	0.543118	1.02637	-0.746402	0.164407	0.329594	-0.0463763	0.409322	-0.107033	0.100616	0.153441	0.249305	0.326328	0.18086	-0.0592115	0.480319	-0.3005	0.432445	-0.824071	0.32179
-4.15696	-0.602748	0.279693	0.97286	0.543054	1.02672	-0.746302	0.165166	0.329379	-0.0468781	0.409848	-0.107518	0.100353	0.153311	0.249228	0.326765	0.181425	-0.0590187	0.480559	-0.300616	0.432108	-0.82381	0.321961
-4.15648	-0.603325	0.279534	0.973113	0.543372	1.0268	-0.746755	0.165832	0.329284	-0.0465209	0.409888	-0.109295	0.1008	0.153431	0.249958	0.327026	0.181915	-0.0586675	0.480467	-0.300404	0.432253	-0.823019	0.322158
-4.156	-0.603263	0.27902	0.972671	0.543463	1.02722	-0.747738	0.166094	0.329035	-0.047164	0.410296	-0.108497	0.100729	0.153975	0.250301	0.326634	0.182192	-0.0586445	0.480785	-0.300339	0.432202	-0.822825	0.322593
-4.15552	-0.604296	0.278747	0.973553	0.543487	1.02801	-0.747425	0.166839	0.32895	-0.0467962	0.410772	-0.107945	0.100979	0.153951	0.250769	0.326493	0.182816	-0.0585538	0.480957	-0.300188	0.432473	-0.822052	0.322954
-4.15504	-0.603591	0.278835	0.97442	0.542585	1.02871	-0.747763	0.167238	0.328737	-0.0469412	0.410676	-0.108058	0.101735	0.15432	0.250885	0.325667	0.183187	-0.0581113	0.480984	-0.300076	0.43267	-0.821781	0.323473
-4.15456	-0.603799	0.278277	0.97467	0.541909	1.02918	-0.748389	0.166889	0.328408	-0.0476545	0.410869	-0.108678	0.102037	0.154561	0.250973	0.325866	0.183738	-0.0578911	0.481046	-0.299874	0.433142	-0.821591	0.323548
-4.15408	-0.602743	0.277883	0.975405	0.541791	1.02955	-0.74764	0.16757	0.328361	-0.0474412	0.410822	-0.110923	0.10221	0.154911	0.251152	0.32574	0.18356	-0.0578196	0.481413	-0.299744	0.433254	-0.821766	0.323872
-4.1536	-0.602796	0.277077	0.976455	0.54109	1.02916	-0.747017	0.168117	0.328216	-0.047558	0.411267	-0.110687	0.102546	0.155369	0.251314	0.325229	0.184413	-0.0578195	0.481445	-0.299653	0.433492	-0.821674	0.323746
-4.15312	-0.603159	0.276754	0.976122	0.539571	1.02997	-0.747131	0.167653	0.328092	-0.0477961	0.411271	-0.110368	0.102605	0.155787	0.251686	0.325366	0.184878	-0.0577618	0.4815	-0.299651	0.43343	-0.822134	0.323828
-4.15264	-0.604149	0.276522	0.976301	0.538629	1.03003	-0.746996	0.167985	0.327772	-0.0481762	0.412112	-0.109889	0.102236	0.15562	0.251612	0.325553	0.18559	-0.0574694	0.481712	-0.299524	0.433309	-0.822208	0.323976
-4.15216	-0.603999	0.275442	0.976673	0.537672	1.03061	-0.747009	0.168113	0.327576	-0.0485895	0.412318	-0.110217	0.102676	0.155517	0.252038	0.325399	0.186133	-0.057235	0.482166	-0.299169	0.433204	-0.8222	0.324115
-4.15168	-0.603393	0.275218	0.977692	0.537537	1.03081	-0.746477	0.168402	0.327509	-0.0488438	0.412299	-0.110287	0.103038	0.155478	0.251919	0.325726	0.186608	-0.0574424	0.482417	-0.298813	0.433493	-0.822075	0.3245
-4.1512	-0.60374	0.274785	0.978228	0.537492	1.03161	-0.746531	0.168255	0.327333	-0.0491281	0.412809	-0.111527	0.103181	0.155515	0.252204	0.325622	0.18769	-0.0572835	0.482932	-0.298439	0.433632	-0.821444	0.324684
-4.15072	-0.603954	0.274298	0.978325	0.53624	1.03189	-0.747111	0.168412	0.327384	-0.0491922	0.413164	-0.110644	0.102476	0.155627	0.252243	0.325621	0.188771	-0.0572766	0.483121	-0.298176	0.433582	-0.821429	0.324979
-4.15024	-0.603523	0.274309	0.978397	0.53603	1.03208	-0.747388	0.168948	0.327462	-0.0486639	0.413687	-0.111185	0.102153	0.155517	0.252137	0.32632	0.189406	-0.0570694	0.483266	-0.298082	0.433547	-0.821763	0.324821
-4.14976	-0.604062	0.273583	0.979143	0.536853	1.03213	-0.745487	0.169123	0.32771	-0.0492419	0.413897	-0.111042	0.101979	0.156134	0.252101	0.326483	0.189698	-0.0572576	0.483296	-0.298062	0.433751	-0.822268	0.324528
-4.14928	-0.604899	0.273474	0.979229	0.536782	1.03281	-0.745561	0.168912	0.327494	-0.0493812	0.414002	-0.109832	0.101343	0.156317	0.251772	0.32667	0.190524	-0.057068	0.483606	-0.297765	0.433967	-0.8226	0.324535
-4.1488	-0.605188	0.273409	0.97969	0.536194	1.03317	-0.745587	0.16918	0.327697	-0.049709	0.414523	-0.109437	0.101137	0.156518	0.251675	0.326767	0.190987	-0.0566955	0.484061	-0.297661	0.434527	-0.822655	0.324545
-4.14832	-0.605359	0.272966	0.979977	0.535614	1.03355	-0.745084	0.169898	0.327416	-0.050023	0.414579	-0.108531	0.100826	0.156872	0.251592	0.327793	0.191517	-0.0563474	0.484474	-0.297689	0.43473	-0.822731	0.324928
-4.14784	-0.605272	0.272716	0.98076	0.535504	1.03412	-0.74548	0.170478	0.327519	-0.0502269	0.415005	-0.108651	0.101089	0.157371	0.251489	0.327246	0.191848	-0.0562904	0.484875	-0.29746	0.434871	-0.823009	0.324847
-4.14736	-0.605474	0.27258	0.981113	0.535773	1.03444	-0.745668	0.170595	0.327599	-0.0508408	0.41548	-0.108777	0.101388	0.157714	0.251766	0.327552	0.192568	-0.0561469	0.485001	-0.297507	0.435034	-0.823371	0.324883
-4.14688	-0.605743	0.272365	0.981562	0.5353	1.03477	-0.743958	0.171584	0.327537	-0.0517463	0.415659	-0.109099	0.101599	0.158267	0.251642	0.328119	0.193052	-0.0563289	0.485271	-0.297289	0.43506	-0.823008	0.32483
-4.1464	-0.606225	0.272004	0.981729	0.534558	1.03483	-0.744064	0.171923	0.327308	-0.0523365	0.415649	-0.110308	0.101622	0.15869	0.251968	0.328223	0.193552	-0.0564125	0.485618	-0.297161	0.435217	-0.823247	0.324396
-4.14592	-0.606511	0.271622	0.982766	0.534426	1.03529	-0.743846	0.172265	0.32748	-0.0531466	0.415743	-0.110437	0.101574	0.159221	0.252226	0.328465	0.193686	-0.0561984	0.486075	-0.297126	0.435833	-0.823759	0.323885
-4.14544	-0.606604	0.271054	0.983253	0.535973	1.03563	-0.74294	0.173022	0.327454	-0.0534524	0.415572	-0.111391	0.101428	0.159217	0.252735	0.328505	0.194055	-0.056207	0.486231	-0.297007	0.43623	-0.823848	0.323948
-4.14496	-0.607896	0.270811	0.983304	0.535738	1.03557	-0.743726	0.173404	0.327143	-0.0536584	0.415704	-0.111475	0.101927	0.159382	0.252729	0.328914	0.19433	-0.0563579	0.486455	-0.296897	0.436305	-0.823649	0.323972
-4.14448	-0.609486	0.271065	0.983321	0.535533	1.03635	-0.744811	0.174133	0.327194	-0.0535964	0.416523	-0.111845	0.101958	0.159889	0.253014	0.328964	0.194657	-0.0562392	0.486568	-0.296779	0.436408	-0.824349	0.323644
-4.144	-0.609516	0.270381	0.983912	0.535356	1.03671	-0.745196	0.174741	0.32705	-0.0541083	0.417252	-0.111831	0.102082	0.160013	0.253354	0.329139	0.193941	-0.0557789	0.486838	-0.296233	0.43665	-0.824829	0.323431
-4.14352	-0.610678	0.270723	0.983503	0.534908	1.03689	-0.7455	0.175212	0.327091	-0.0552668	0.417695	-0.111169	0.102011	0.160186	0.253967	0.329823	0.193853	-0.0555965	0.487251	-0.295812	0.437142	-0.824869	0.323504
-4.14304	-0.611819	0.270602	0.982669	0.535397	1.03744	-0.745428	0.175653	0.327282	-0.0554555	0.418313	-0.109979	0.101894	0.160475	0.253973	0.330077	0.193604	-0.0555486	0.487383	-0.295672	0.437631	-0.824651	0.323327
-4.14256	-0.612431	0.27045	0.983098	0.535863	1.03779	-0.745914	0.175678	0.327364	-0.0555037	0.418643	-0.109413	0.102553	0.160692	0.254385	0.329826	0.193862	-0.0553971	0.488074	-0.295554	0.437667	-0.824944	0.323454
-4.14208	-0.613578	0.270225	0.983537	0.536029	1.03771	-0.745991	0.175893	0.32753	-0.0559553	0.418705	-0.109401	0.10285	0.16048	0.25469	0.328748	0.194054	-0.055155	0.488287	-0.295298	0.437636	-0.825187	0.323581
-4.1416	-0.614567	0.269749	0.98348	0.536726	1.03801	-0.746009	0.176594	0.327776	-0.0566523	0.418749	-0.109199	0.10307	0.160895	0.254877	0.328884	0.19435	-0.0550019	0.488423	-0.295085	0.43766	-0.825381	0.323257
-4.14112	-0.615173	0.269546	0.983995	0.536507	1.03859	-0.745063	0.177731	0.327766	-0.0564082	0.41963	-0.110035	0.103286	0.161456	0.25504	0.329152	0.194127	-0.0547916	0.488779	-0.295058	0.437671	-0.825121	0.323224
-4.14064	-0.617014	0.269112	0.983896	0.536624	1.0393	-0.744543	0.178477	0.327752	-0.0567939	0.420424	-0.110047	0.104519	0.161701	0.255579	0.328685	0.194229	-0.0547422	0.489053	-0.294697	0.437857	-0.825134	0.323162
-4.14016	-0.618406	0.269083	0.983631	0.537277	1.03996	-0.74581	0.179406	0.327825	-0.056357	0.420555	-0.109856	0.105093	0.161728	0.255248	0.328741	0.193934	-0.0547433	0.489713	-0.294534	0.437915	-0.825875	0.323248
-4.13968	-0.619017	0.268737	0.983422	0.53779	1.04018	-0.745747	0.179654	0.327549	-0.0564669	0.420287	-0.109699	0.104974	0.161722	0.255696	0.328569	0.194225	-0.0547422	0.490174	-0.294112	0.438464	-0.82603	0.32311
-4.1392	-0.620487	0.268453	0.983637	0.538671	1.0407	-0.74632	0.18049	0.327651	-0.0560599	0.420489	-0.110016	0.1048	0.162307	0.255758	0.327995	0.194459	-0.0544654	0.490138	-0.294084	0.438991	-0.826031	0.322903
-4.13872	-0.61991	0.268132	0.983648	0.540747	1.04086	-0.746509	0.181075	0.327882	-0.0569706	0.420526	-0.109474	0.104671	0.163092	0.255777	0.328425	0.19479	-0.0542787	0.4904	-0.294251	0.439191	-0.825566	0.322733
-4.13824	-0.620715	0.268091	0.984381	0.54139	1.04125	-0.746567	0.181948	0.327617	-0.0583607	0.421196	-0.110338	0.105073	0.16328	0.256335	0.328841	0.195173	-0.0541194	0.490781	-0.294097	0.439184	-0.825297	0.322821
-4.13776	-0.620655	0.268029	0.985147	0.542187	1.04151	-0.746974	0.182255	0.32756	-0.0590127	0.421456	-0.110193	0.105336	0.163511	0.256774	0.328722	0.19557	-0.0536608	0.490964	-0.293862	0.438999	-0.825346	0.322897
-4.13728	-0.621264	0.268086	0.984727	0.543274	1.04175	-0.746137	0.183012	0.327694	-0.0591473	0.421438	-0.109697	0.105436	0.163908	0.256823	0.328957	0.196046	-0.0533316	0.491056	-0.29364	0.43913	-0.825467	0.322679
-4.1368	-0.621378	0.268407	0.985069	0.54473	1.04216	-0.746415	0.183485	0.32765	-0.0595915	0.421419	-0.108699	0.106074	0.164174	0.257273	0.328822	0.195881	-0.052743	0.49123	-0.293617	0.439194	-0.82561	0.322469
-4.13632	-0.621319	0.26777	0.984932	0.545583	1.04295	-0.746139	0.183769	0.327601	-0.0605243	0.421908	-0.108701	0.10604	0.164369	0.257415	0.329071	0.195933	-0.0526657	0.491031	-0.293446	0.439514	-0.826233	0.322222
-4.13584	-0.621502	0.268079	0.984709	0.547136	1.04369	-0.746994	0.184115	0.327575	-0.0606314	0.42169	-0.108787	0.106232	0.164469	0.257521	0.329362	0.196011	-0.0523641	0.491615	-0.293658	0.439452	-0.826097	0.321876
-4.13536	-0.6214	0.268345	0.984818	0.547626	1.04402	-0.747767	0.184896	0.327785	-0.0617435	0.421382	-0.109124	0.106293	0.164234	0.258102	0.330096	0.19653	-0.0520506	0.491767	-0.293255	0.4398	-0.826371	0.32225
-4.13488	-0.620815	0.268083	0.984931	0.548519	1.04474	-0.748396	0.185666	0.327774	-0.0624971	0.421273	-0.108005	0.106439	0.16425	0.258099	0.330327	0.196902	-0.0519623	0.491951	-0.293113	0.439759	-0.826444	0.322523
-4.1344	-0.621879	0.267556	0.98444	0.54958	1.04514	-0.746811	0.186272	0.32788	-0.0619049	0.420986	-0.108044	0.10626	0.164359	0.25843	0.330744	0.197179	-0.0515007	0.492046	-0.292573	0.439153	-0.826621	0.32294
-4.13392	-0.621263	0.267386	0.984113	0.550541	1.04596	-0.74726	0.186984	0.328038	-0.0616704	0.420715	-0.108155	0.105947	0.16437	0.258806	0.33064	0.19753	-0.0511713	0.492452	-0.29229	0.439218	-0.826792	0.323121
-4.13344	-0.620745	0.266935	0.98376	0.551294	1.04623	-0.747585	0.186952	0.327788	-0.0613499	0.420581	-0.107652	0.105668	0.164623	0.259254	0.330544	0.197627	-0.0507422	0.492608	-0.292281	0.439432	-0.827078	0.323165
-4.13296	-0.621715	0.266599	0.983559	0.552771	1.04701	-0.748306	0.187348	0.327864	-0.0619475	0.420526	-0.107184	0.105598	0.1645	0.2598	0.330859	0.198423	-0.0504441	0.493058	-0.292402	0.439251	-0.827294	0.323483
-4.13248	-0.621272	0.266413	0.984216	0.551633	1.04792	-0.748732	0.187633	0.32785	-0.0617741	0.420185	-0.107092	0.105118	0.164571	0.260566	0.331127	0.198803	-0.0503989	0.493021	-0.291937	0.439239	-0.827163	0.323843
-4.132	-0.620968	0.267261	0.984119	0.553385	1.04832	-0.748523	0.187659	0.327807	-0.0614658	0.420153	-0.107227	0.104973	0.164752	0.260917	0.331389	0.198841	-0.0501929	0.493092	-0.291947	0.439329	-0.826934	0.324137
-4.13152	-0.621171	0.267507	0.983955	0.554606	1.04892	-0.748727	0.187563	0.327845	-0.0615035	0.4202	-0.10678	0.104848	0.164767	0.261058	0.331076	0.198897	-0.0498361	0.493355	-0.291533	0.439761	-0.827856	0.324531
-4.13104	-0.620894	0.267675	0.983193	0.555125	1.04997	-0.749389	0.188001	0.327884	-0.0614937	0.420625	-0.106315	0.104952	0.164828	0.261234	0.331581	0.199298	-0.0497161	0.493573	-0.29155	0.439909	-0.827666	0.324815
-4.13056	-0.621484	0.26746	0.982419	0.556516	1.0504	-0.750359	0.188043	0.32807	-0.0613455	0.420735	-0.106377	0.105016	0.164885	0.261319	0.331826	0.199546	-0.0493734	0.493643	-0.291333	0.43985	-0.827416	0.324777
-4.13008	-0.621964	0.267374	0.982786	0.554772	1.05128	-0.750476	0.18809	0.328087	-0.0612995	0.421137	-0.105783	0.104601	0.164934	0.261486	0.331594	0.199645	-0.048815	0.493867	-0.290878	0.439749	-0.827665	0.324906
-4.1296	-0.621898	0.267473	0.983434	0.555325	1.05214	-0.749869	0.187766	0.328264	-0.0614155	0.421225	-0.10573	0.104653	0.164866	0.261544	0.331887	0.199415	-0.0485704	0.494266	-0.290527	0.439448	-0.827098	0.32508
-4.12912	-0.62208	0.267514	0.983631	0.554121	1.05225	-0.74966	0.187831	0.328402	-0.0613227	0.420743	-0.10562	0.103917	0.165025	0.261899	0.332222	0.199717	-0.0486171	0.494702	-0.290487	0.439546	-0.827121	0.325302
-4.12864	-0.621592	0.267267	0.983478	0.554962	1.0527	-0.749815	0.188002	0.328449	-0.0608933	0.420768	-0.105389	0.103264	0.165087	0.261522	0.33352	0.199493	-0.0483813	0.495096	-0.290219	0.439412	-0.827443	0.325558
-4.12816	-0.621011	0.267809	0.983369	0.555657	1.05308	-0.749593	0.188004	0.32847	-0.061148	0.420841	-0.105238	0.103061	0.165361	0.261645	0.333658	0.199499	-0.0480632	0.495364	-0.289781	0.439603	-0.826876	0.325542
-4.12768	-0.620699	0.268442	0.983432	0.556462	1.05438	-0.74921	0.188016	0.32846	-0.0610833	0.421287	-0.10486	0.1034	0.165642	0.261497	0.33363	0.199737	-0.048122	0.495631	-0.289537	0.439768	-0.826995	0.325869
-4.1272	-0.620345	0.268646	0.983134	0.556163	1.05502	-0.748419	0.188439	0.328208	-0.061651	0.421379	-0.104122	0.103136	0.165496	0.261484	0.333961	0.199941	-0.0481035	0.495791	-0.289186	0.439506	-0.826658	0.32617
-4.12672	-0.620851	0.26878	0.982409	0.555813	1.05549	-0.74976	0.188439	0.328062	-0.0632046	0.421631	-0.103521	0.103023	0.16565	0.261788	0.334599	0.200308	-0.048307	0.496546	-0.289036	0.439465	-0.826348	0.325799
-4.12624	-0.620955	0.269792	0.982795	0.555736	1.05655	-0.749698	0.189287	0.328066	-0.0629049	0.421254	-0.103376	0.102847	0.165963	0.261832	0.334936	0.200463	-0.0481847	0.496777	-0.289014	0.439372	-0.826456	0.325528
-4.12576	-0.621523	0.270024	0.982862	0.556937	1.0567	-0.75005	0.189326	0.328066	-0.0635548	0.421092	-0.102933	0.102287	0.165936	0.262336	0.334837	0.199992	-0.0482635	0.497195	-0.288716	0.439114	-0.826529	0.325718
-4.12528	-0.62175	0.270582	0.982371	0.555818	1.05718	-0.749358	0.189311	0.32822	-0.0641615	0.420679	-0.102889	0.102031	0.165909	0.263019	0.335668	0.200299	-0.0480015	0.497566	-0.288632	0.439129	-0.82626	0.32578
-4.1248	-0.621754	0.271027	0.982123	0.556957	1.05806	-0.749852	0.189682	0.328253	-0.065014	0.420183	-0.102576	0.1021	0.166028	0.263665	0.335659	0.200857	-0.0480339	0.497933	-0.288487	0.439183	-0.826326	0.325445
-4.12432	-0.621052	0.270598	0.981547	0.557254	1.05874	-0.749793	0.189767	0.328128	-0.0655141	0.41982	-0.102715	0.10179	0.166156	0.26444	0.335735	0.200522	-0.0480992	0.498522	-0.288091	0.438994	-0.826441	0.325397
-4.12384	-0.62128	0.270397	0.98145	0.557767	1.05929	-0.750031	0.190326	0.32805	-0.0652883	0.420274	-0.102981	0.101781	0.166419	0.265086	0.335408	0.200482	-0.0481003	0.498958	-0.287412	0.438824	-0.826392	0.325469
-4.12336	-0.620373	0.27039	0.981231	0.557471	1.05988	-0.750021	0.190754	0.328069	-0.065794	0.42019	-0.103363	0.102172	0.166334	0.264824	0.335784	0.200986	-0.0480754	0.499291	-0.287107	0.438884	-0.82665	0.3255
-4.12288	-0.620109	0.269698	0.981084	0.557213	1.06087	-0.749705	0.190803	0.328344	-0.0661148	0.420325	-0.102923	0.101785	0.166479	0.265098	0.33587	0.200884	-0.0478952	0.49939	-0.286583	0.438833	-0.826277	0.325523
-4.1224	-0.619747	0.269195	0.980569	0.556933	1.0612	-0.749739	0.191342	0.328314	-0.0668353	0.420583	-0.103093	0.101719	0.166114	0.265189	0.335814	0.200925	-0.0478221	0.499559	-0.286341	0.438552	-0.826573	0.325592
-4.12192	-0.620119	0.269169	0.980294	0.557521	1.0617	-0.749628	0.191681	0.328603	-0.0668746	0.420544	-0.102872	0.101251	0.16612	0.265252	0.335658	0.201329	-0.0474857	0.499964	-0.286167	0.438768	-0.826536	0.325541
-4.12144	-0.620237	0.269396	0.980289	0.557751	1.06205	-0.749703	0.192273	0.32875	-0.0667273	0.420454	-0.102599	0.10021	0.165983	0.265063	0.335708	0.201623	-0.0474906	0.500447	-0.285707	0.43884	-0.826174	0.325456
-4.12096	-0.620134	0.269451	0.979895	0.557622	1.063	-0.750217	0.192615	0.328648	-0.0665908	0.420725	-0.101755	0.0997282	0.166084	0.26519	0.335967	0.201696	-0.0473785	0.50085	-0.28558	0.439077	-0.825466	0.325659
-4.12048	-0.620214	0.2697	0.979449	0.55723	1.06322	-0.750197	0.192293	0.328621	-0.0662525	0.420962	-0.101528	0.0992812	0.166225	0.265135	0.336284	0.201799	-0.0473375	0.501238	-0.285497	0.438786	-0.82491	0.325714
-4.12	-0.619421	0.26971	0.979971	0.55676	1.06389	-0.750115	0.192598	0.328744	-0.0672659	0.421298	-0.100766	0.0989273	0.16604	0.265014	0.336306	0.2023	-0.0473793	0.501883	-0.285196	0.438346	-0.825392	0.326394
-4.11952	-0.619266	0.269839	0.979092	0.55627	1.06505	-0.750815	0.192818	0.328752	-0.0671493	0.420968	-0.100023	0.0984895	0.166043	0.265228	0.336387	0.20251	-0.0476609	0.50251	-0.284854	0.437993	-0.825209	0.326085
-4.11904	-0.619044	0.269931	0.978438	0.555452	1.06589	-0.75102	0.192807	0.329179	-0.0676196	0.420916	-0.0986783	0.098436	0.166066	0.265719	0.336682	0.20266	-0.0474703	0.502665	-0.284623	0.438044	-0.824894	0.326332
-4.11856	-0.618833	0.269836	0.978283	0.555826	1.06644	-0.75188	0.192921	0.329223	-0.0679808	0.421	-0.0986624	0.0987621	0.166345	0.266086	0.337059	0.203039	-0.0474218	0.502732	-0.284532	0.437792	-0.824671	0.32642
-4.11808	-0.619125	0.269869	0.977889	0.555623	1.06701	-0.752047	0.193286	0.32932	-0.0681754	0.421251	-0.0978967	0.0980825	0.166397	0.266002	0.337131	0.203395	-0.0474441	0.503224	-0.284058	0.437215	-0.824295	0.32699
[truncated: 18,996 more rows]

## Sheet: CA3 Ripple V_m slow
0	719301	521501	659105	580601	526202	525403	525101	521602	719001	520901	719103	521202	525404	719002	520701	525003	521502	521101	719303	719201	525301	525001	659101	521401	580201	580501	521302	520702	521303	521102	521304	719202
[truncated: 20,834 more rows]

[truncated: 10 more sheets: CA1 Ripple V_m slow, DG Ripple model slow, CA3 Ripple model slow, CA1 Ripple model slow, DG Ripple V_m fast, CA3 Ripple V_m fast, CA1 Ripple V_m fast, DG Ripple spikes, CA3 Ripple spikes, CA1 Ripple spikes]
