# Supplementary material for: UP-DOWN states and ripples differentially modulate membrane potential dynamics across DG, CA3, and CA1 in awake mice
Source: eLife. 2022 Jul 12;11:e69596. doi: 10.7554/eLife.69596 (PMC9275824; doi:10.7554/eLife.69596)
Supplement: Figure 6—source data 1. [file elife-69596-fig6-data1.xls]

## Sheet: DG Ripple V_m slow
0	524201	524202	523701	523302	523502	523901	523301	524203	524102	523801	524002	523401	523601	523402	523501	523702	524101	524003	524001	659202	523602	659201
-4.99984	-0.261787	0.0727469	0.938205	0.514077	0.240062	-0.880508	-0.262873	0.558446	-0.364967	0.142514	-0.770204	0.441028	0.296921	0.140906	0.238611	0.901641	0.160406	0.555996	0.287284	0.412636	-1.0427	0.37107
-4.99936	-0.260656	0.0728765	0.938874	0.513312	0.240462	-0.880507	-0.263641	0.558595	-0.365138	0.142031	-0.769412	0.44035	0.297089	0.141109	0.23858	0.901614	0.16003	0.555885	0.287278	0.412704	-1.04315	0.370996
-4.99888	-0.259844	0.0728421	0.939316	0.513188	0.240321	-0.879961	-0.264074	0.558572	-0.365186	0.142703	-0.767595	0.440084	0.297309	0.141218	0.23845	0.901863	0.159798	0.555613	0.287888	0.412899	-1.04326	0.370948
-4.9984	-0.25904	0.0724851	0.939336	0.511507	0.24077	-0.879308	-0.264656	0.558685	-0.364664	0.142837	-0.767428	0.439906	0.297526	0.141363	0.238087	0.902097	0.159309	0.555386	0.287999	0.413665	-1.04275	0.371452
-4.99792	-0.258614	0.072182	0.939039	0.509869	0.241092	-0.877825	-0.265411	0.558766	-0.36383	0.142974	-0.766095	0.439209	0.29742	0.141284	0.238579	0.901939	0.159112	0.555287	0.288435	0.414125	-1.04301	0.371573
-4.99744	-0.257202	0.0714547	0.938834	0.509141	0.242485	-0.87633	-0.265957	0.558983	-0.363416	0.143309	-0.765477	0.438884	0.297244	0.140932	0.238341	0.902133	0.15884	0.55559	0.288689	0.414862	-1.0435	0.371409
-4.99696	-0.256919	0.07124	0.939285	0.507377	0.242809	-0.875963	-0.266104	0.558956	-0.363832	0.143658	-0.763562	0.43786	0.297494	0.140912	0.239006	0.902758	0.157854	0.55518	0.288944	0.415398	-1.04352	0.371502
-4.99648	-0.257151	0.071147	0.939956	0.507062	0.243008	-0.876758	-0.26671	0.559041	-0.363046	0.143748	-0.76379	0.437681	0.297537	0.141035	0.238689	0.902819	0.157105	0.555494	0.289123	0.415736	-1.04378	0.371171
-4.996	-0.257263	0.0707364	0.940318	0.50599	0.242921	-0.878114	-0.266507	0.559078	-0.362974	0.144252	-0.763248	0.437645	0.2976	0.140517	0.239549	0.902201	0.156599	0.555123	0.289264	0.416359	-1.04385	0.370957
-4.99552	-0.257254	0.0708051	0.940712	0.505276	0.243057	-0.878284	-0.26627	0.559243	-0.363517	0.144578	-0.762776	0.437873	0.297916	0.140641	0.24003	0.902121	0.155972	0.555364	0.289599	0.416722	-1.04386	0.370603
-4.99504	-0.257457	0.0696533	0.941393	0.505346	0.24374	-0.878988	-0.26673	0.559273	-0.363628	0.144996	-0.761738	0.437151	0.298346	0.140757	0.240151	0.901607	0.155425	0.555536	0.289884	0.417013	-1.04433	0.370612
-4.99456	-0.257132	0.0693431	0.941781	0.505227	0.243642	-0.87924	-0.267401	0.559511	-0.363225	0.145899	-0.761153	0.436593	0.298576	0.140065	0.239742	0.901584	0.154828	0.556	0.290094	0.417511	-1.04465	0.370624
-4.99408	-0.257486	0.0695511	0.942559	0.504798	0.244031	-0.879024	-0.267869	0.559863	-0.363851	0.14626	-0.760851	0.435997	0.298664	0.139722	0.239748	0.90152	0.154396	0.556337	0.290198	0.417865	-1.04457	0.370827
-4.9936	-0.257366	0.0698847	0.943551	0.504205	0.244877	-0.879553	-0.268191	0.560175	-0.364129	0.1458	-0.760898	0.435633	0.298809	0.139656	0.239848	0.901174	0.153865	0.556294	0.290347	0.418204	-1.04466	0.370889
-4.99312	-0.257093	0.0697214	0.943866	0.504179	0.245392	-0.879953	-0.269517	0.560432	-0.363586	0.14582	-0.760766	0.435548	0.299055	0.139695	0.24067	0.900971	0.153131	0.556308	0.290414	0.418443	-1.04487	0.370934
-4.99264	-0.256973	0.0691668	0.94441	0.503218	0.245923	-0.879669	-0.269864	0.560391	-0.363661	0.146474	-0.759643	0.434677	0.299219	0.139373	0.240761	0.900517	0.152425	0.556271	0.290187	0.418758	-1.04503	0.370829
-4.99216	-0.256868	0.0686347	0.945828	0.502321	0.246478	-0.878998	-0.270206	0.560459	-0.362878	0.147072	-0.759306	0.434428	0.299629	0.139173	0.240931	0.900284	0.152103	0.556132	0.290369	0.419089	-1.04531	0.370941
-4.99168	-0.256866	0.0689254	0.945537	0.502383	0.246652	-0.878017	-0.270585	0.560431	-0.362482	0.147202	-0.759296	0.433997	0.299704	0.138721	0.241617	0.899796	0.151728	0.555971	0.290848	0.419095	-1.0449	0.370782
-4.9912	-0.256831	0.0685262	0.946664	0.501122	0.246757	-0.877536	-0.270848	0.560524	-0.362799	0.148081	-0.759507	0.432779	0.299664	0.138429	0.241821	0.899683	0.151153	0.556159	0.29047	0.419279	-1.04499	0.370672
-4.99072	-0.256332	0.068343	0.947248	0.500367	0.247333	-0.877543	-0.27148	0.560949	-0.362557	0.148069	-0.759227	0.432498	0.29965	0.138282	0.242683	0.89861	0.150634	0.556269	0.290563	0.419434	-1.04471	0.37067
-4.99024	-0.256552	0.0678625	0.947946	0.498866	0.247609	-0.876972	-0.271435	0.561043	-0.362361	0.148613	-0.759507	0.432804	0.299746	0.137923	0.242781	0.898562	0.149993	0.556175	0.291195	0.419888	-1.04427	0.370457
-4.98976	-0.256754	0.0679141	0.948504	0.498715	0.24797	-0.876804	-0.271612	0.561021	-0.362601	0.149267	-0.758526	0.432206	0.300027	0.137745	0.243417	0.89831	0.149492	0.556148	0.29124	0.420136	-1.04406	0.369979
-4.98928	-0.256858	0.0674975	0.949988	0.498056	0.248878	-0.875599	-0.271686	0.56112	-0.36201	0.149599	-0.757738	0.43149	0.300614	0.137649	0.24422	0.897992	0.148832	0.556049	0.291396	0.420949	-1.04471	0.369655
-4.9888	-0.257651	0.0671945	0.95054	0.498378	0.249487	-0.873927	-0.272113	0.560969	-0.362553	0.1496	-0.756565	0.431259	0.300827	0.137435	0.244342	0.898707	0.148244	0.556439	0.291767	0.421539	-1.04508	0.369288
-4.98832	-0.257278	0.0673447	0.951026	0.497904	0.250119	-0.873735	-0.272801	0.561048	-0.362536	0.149793	-0.755991	0.430502	0.30086	0.136767	0.244185	0.899323	0.147696	0.557054	0.292013	0.421903	-1.04592	0.36843
-4.98784	-0.25749	0.0674109	0.95191	0.497147	0.250441	-0.874464	-0.273384	0.561561	-0.362053	0.15001	-0.755477	0.429726	0.300983	0.136479	0.244738	0.898756	0.147251	0.55751	0.292051	0.421796	-1.04569	0.368216
-4.98736	-0.257117	0.0674851	0.95331	0.495879	0.251175	-0.873971	-0.274048	0.56171	-0.362168	0.15003	-0.754419	0.429335	0.301501	0.13637	0.244936	0.899553	0.146553	0.557917	0.292254	0.421873	-1.0458	0.367489
-4.98688	-0.257132	0.0676753	0.954308	0.495044	0.251644	-0.873063	-0.274563	0.561513	-0.362163	0.150365	-0.753566	0.428575	0.301626	0.135806	0.244919	0.899771	0.146124	0.557368	0.292336	0.422161	-1.04553	0.366875
-4.9864	-0.256505	0.0683477	0.954492	0.494989	0.251952	-0.871948	-0.275359	0.561634	-0.362312	0.150738	-0.753054	0.427945	0.301617	0.135477	0.244731	0.899594	0.145525	0.557128	0.292491	0.422374	-1.04513	0.366181
-4.98592	-0.256012	0.0680583	0.955192	0.49445	0.25194	-0.871069	-0.276182	0.561778	-0.362455	0.150951	-0.752837	0.427607	0.301747	0.134961	0.244318	0.899329	0.144975	0.557241	0.292584	0.422541	-1.04475	0.3657
-4.98544	-0.256043	0.0680477	0.955266	0.494193	0.252457	-0.86958	-0.276631	0.561828	-0.362767	0.150992	-0.752087	0.427315	0.301576	0.134848	0.24508	0.898831	0.144539	0.557753	0.292406	0.42276	-1.04424	0.364685
-4.98496	-0.257235	0.0684603	0.954914	0.493417	0.25328	-0.869358	-0.277078	0.561908	-0.362681	0.151426	-0.751847	0.427187	0.301635	0.134265	0.244996	0.898803	0.144262	0.557569	0.292783	0.42268	-1.04417	0.363961
-4.98448	-0.257572	0.0682778	0.955269	0.493123	0.253941	-0.868377	-0.277608	0.562161	-0.361625	0.151555	-0.750531	0.426632	0.301308	0.134129	0.245448	0.898567	0.143817	0.557562	0.292768	0.423126	-1.04318	0.363327
-4.984	-0.258011	0.0690068	0.955463	0.491912	0.254355	-0.867478	-0.277988	0.56227	-0.362258	0.151627	-0.748841	0.426062	0.301532	0.134104	0.24556	0.897971	0.143668	0.557522	0.293045	0.423669	-1.04281	0.363917
-4.98352	-0.258094	0.0694036	0.956034	0.491429	0.254422	-0.867598	-0.27807	0.562569	-0.361823	0.152718	-0.74736	0.426005	0.30114	0.134645	0.246329	0.898009	0.143279	0.557191	0.293205	0.42376	-1.04222	0.364222
-4.98304	-0.258218	0.0696115	0.956413	0.490308	0.25466	-0.867259	-0.278708	0.562469	-0.361584	0.153151	-0.744648	0.425367	0.301078	0.134955	0.246918	0.898263	0.14294	0.557302	0.293232	0.424481	-1.04232	0.363999
-4.98256	-0.258325	0.0702443	0.956244	0.489991	0.255206	-0.867489	-0.279721	0.562564	-0.36027	0.153546	-0.743491	0.425043	0.301236	0.134584	0.246783	0.899128	0.14251	0.557377	0.29311	0.424934	-1.04163	0.363685
-4.98208	-0.258914	0.0705759	0.9575	0.489086	0.255208	-0.867273	-0.279883	0.562617	-0.359725	0.154422	-0.742181	0.423952	0.301123	0.134639	0.246344	0.898609	0.14211	0.557177	0.293117	0.425514	-1.04112	0.363758
-4.9816	-0.258913	0.0711477	0.957668	0.486955	0.255338	-0.867557	-0.280156	0.562762	-0.35868	0.154893	-0.741476	0.423622	0.30152	0.134768	0.246052	0.898656	0.141905	0.557267	0.293312	0.425728	-1.04013	0.363645
-4.98112	-0.259418	0.0715319	0.957826	0.486197	0.255978	-0.867216	-0.280407	0.562686	-0.358185	0.154593	-0.74069	0.422761	0.301323	0.134635	0.246391	0.898237	0.141514	0.557464	0.293656	0.425529	-1.04015	0.364183
-4.98064	-0.259498	0.0720669	0.958148	0.486158	0.256272	-0.866732	-0.280928	0.562533	-0.357766	0.155056	-0.739847	0.422018	0.301441	0.134961	0.246813	0.898081	0.141142	0.557932	0.293881	0.426163	-1.03983	0.364452
-4.98016	-0.259712	0.0725305	0.958848	0.486023	0.256538	-0.866365	-0.281502	0.562435	-0.356709	0.155827	-0.739129	0.421635	0.301524	0.135315	0.247476	0.898572	0.140668	0.558077	0.29373	0.426475	-1.03953	0.363989
-4.97968	-0.259389	0.0724826	0.95875	0.485754	0.256828	-0.865472	-0.281076	0.562481	-0.355872	0.156414	-0.738996	0.421508	0.30155	0.13533	0.2478	0.898148	0.140151	0.557974	0.294268	0.426809	-1.03916	0.364244
-4.9792	-0.259527	0.0720511	0.9597	0.485143	0.257808	-0.86448	-0.280942	0.562586	-0.355069	0.156583	-0.737377	0.420428	0.301358	0.135714	0.248246	0.898498	0.139748	0.558194	0.294139	0.427294	-1.03828	0.363866
-4.97872	-0.259787	0.0720223	0.960808	0.484977	0.258141	-0.864222	-0.281345	0.562755	-0.353909	0.156802	-0.73686	0.41997	0.301984	0.136022	0.247994	0.898094	0.13959	0.558551	0.293954	0.427614	-1.03731	0.363363
-4.97824	-0.260407	0.0723566	0.960063	0.484498	0.258284	-0.864304	-0.281198	0.562635	-0.352417	0.157763	-0.736291	0.419904	0.302188	0.135936	0.248286	0.89789	0.139238	0.559102	0.294201	0.428245	-1.03659	0.363369
-4.97776	-0.261138	0.0726502	0.959691	0.484306	0.258343	-0.863789	-0.28139	0.562592	-0.351928	0.158504	-0.734924	0.419758	0.302058	0.136108	0.248493	0.897797	0.139122	0.559141	0.293991	0.428126	-1.03659	0.363035
-4.97728	-0.260753	0.0732398	0.960581	0.484011	0.258789	-0.863104	-0.280767	0.56258	-0.351268	0.159325	-0.733729	0.419943	0.30208	0.135954	0.248618	0.897135	0.138728	0.558972	0.293841	0.428293	-1.03641	0.363006
-4.9768	-0.260212	0.0738367	0.961143	0.483862	0.259319	-0.861498	-0.280161	0.56271	-0.350988	0.159597	-0.733657	0.41967	0.302326	0.136299	0.248854	0.897908	0.138525	0.55872	0.294068	0.4286	-1.0354	0.362654
-4.97632	-0.260561	0.0734283	0.961216	0.484395	0.259614	-0.860658	-0.28033	0.5627	-0.350203	0.160012	-0.732863	0.419038	0.302794	0.135981	0.248845	0.897228	0.1385	0.559066	0.294141	0.42887	-1.03459	0.36211
-4.97584	-0.260909	0.0734606	0.961872	0.483697	0.2598	-0.86088	-0.280269	0.562977	-0.34975	0.160258	-0.732437	0.418894	0.303094	0.135981	0.248846	0.896907	0.138204	0.559472	0.294154	0.428984	-1.03414	0.361514
-4.97536	-0.261077	0.0728602	0.962047	0.48428	0.26009	-0.859623	-0.280279	0.563075	-0.350273	0.160401	-0.731226	0.418939	0.302906	0.136172	0.248754	0.897022	0.137948	0.559608	0.294398	0.428992	-1.03402	0.361287
-4.97488	-0.26102	0.073143	0.962431	0.483781	0.260208	-0.859017	-0.279552	0.563173	-0.350346	0.160778	-0.73031	0.418168	0.30353	0.136334	0.248571	0.897284	0.137569	0.559555	0.29407	0.428798	-1.03446	0.360956
-4.9744	-0.261202	0.0729999	0.962641	0.483974	0.260457	-0.859166	-0.279841	0.563726	-0.349717	0.160431	-0.72968	0.418507	0.304138	0.136783	0.249135	0.897	0.137187	0.559581	0.293988	0.428636	-1.03412	0.360811
-4.97392	-0.261701	0.0726842	0.962797	0.484058	0.260745	-0.859623	-0.279073	0.563767	-0.348525	0.160506	-0.729396	0.41824	0.304208	0.136753	0.249316	0.896701	0.136796	0.559449	0.294096	0.428703	-1.03414	0.360289
-4.97344	-0.2622	0.0725146	0.962785	0.483557	0.261032	-0.859553	-0.279127	0.56381	-0.348252	0.161437	-0.730438	0.417588	0.304184	0.137008	0.249446	0.897202	0.136507	0.559349	0.294401	0.42896	-1.03341	0.360407
-4.97296	-0.262044	0.0722651	0.962721	0.483304	0.261245	-0.858572	-0.279404	0.563917	-0.348362	0.161862	-0.729535	0.41775	0.304379	0.136909	0.250248	0.89774	0.136164	0.559176	0.294335	0.429213	-1.03263	0.360029
-4.97248	-0.261966	0.0717163	0.96241	0.482725	0.261735	-0.858926	-0.279495	0.564128	-0.348056	0.162548	-0.729691	0.417256	0.304233	0.137144	0.250793	0.897957	0.136033	0.559598	0.294167	0.429267	-1.03258	0.359752
-4.972	-0.262472	0.0721366	0.9623	0.481687	0.262231	-0.858761	-0.279626	0.564173	-0.348207	0.162963	-0.729124	0.417281	0.304177	0.137486	0.251228	0.898346	0.135586	0.559593	0.293902	0.428991	-1.03243	0.359507
-4.97152	-0.262815	0.071142	0.962061	0.480455	0.26225	-0.85958	-0.278824	0.564172	-0.348225	0.162908	-0.728525	0.416475	0.30418	0.137468	0.251309	0.898471	0.135472	0.559634	0.293977	0.42927	-1.03275	0.359228
-4.97104	-0.262631	0.0718441	0.962431	0.479243	0.261967	-0.859716	-0.278039	0.564297	-0.34717	0.163081	-0.727787	0.416144	0.30454	0.137873	0.252043	0.898968	0.135203	0.559661	0.293865	0.429464	-1.03195	0.358939
-4.97056	-0.263023	0.0711893	0.962622	0.477827	0.262453	-0.859441	-0.277985	0.564182	-0.34617	0.164066	-0.727126	0.415765	0.304648	0.138009	0.253315	0.898606	0.134862	0.559708	0.293693	0.429545	-1.0319	0.358665
-4.97008	-0.263065	0.0709359	0.963148	0.475134	0.262664	-0.858211	-0.277373	0.564283	-0.345406	0.16407	-0.726311	0.41503	0.304828	0.138198	0.253136	0.898075	0.134665	0.559791	0.293392	0.429604	-1.03176	0.35833
-4.9696	-0.263268	0.0705056	0.963507	0.474384	0.263441	-0.857501	-0.277272	0.564431	-0.34414	0.163932	-0.725242	0.414871	0.305005	0.138319	0.253994	0.898173	0.134301	0.559756	0.2933	0.429552	-1.0321	0.35755
-4.96912	-0.263296	0.0700789	0.963214	0.475027	0.264242	-0.856679	-0.276774	0.564474	-0.343302	0.164447	-0.72461	0.414031	0.305128	0.138774	0.254552	0.898272	0.133803	0.55941	0.293398	0.429523	-1.03146	0.357642
-4.96864	-0.263518	0.0694916	0.963618	0.474006	0.264088	-0.85748	-0.276023	0.564519	-0.342754	0.164805	-0.723772	0.413674	0.305334	0.138992	0.255108	0.89835	0.133711	0.559655	0.29324	0.429623	-1.03055	0.357504
-4.96816	-0.264111	0.0685805	0.963029	0.473976	0.264793	-0.857626	-0.275676	0.564761	-0.342752	0.165205	-0.723738	0.413102	0.305092	0.138936	0.25607	0.898716	0.1334	0.559409	0.293328	0.429738	-1.03049	0.357298
-4.96768	-0.265489	0.0683964	0.962959	0.473638	0.265322	-0.857761	-0.275054	0.56471	-0.342184	0.165449	-0.72375	0.412706	0.304855	0.138631	0.256277	0.898553	0.13326	0.559414	0.293038	0.429534	-1.02934	0.356633
-4.9672	-0.266173	0.0671912	0.963072	0.473171	0.2657	-0.858739	-0.274585	0.564811	-0.341525	0.165431	-0.722471	0.412127	0.30456	0.139164	0.256538	0.898287	0.132748	0.559331	0.292511	0.429734	-1.02854	0.356806
-4.96672	-0.266833	0.0663754	0.963207	0.472437	0.26607	-0.859698	-0.274885	0.564785	-0.341458	0.165784	-0.722149	0.411568	0.304572	0.139033	0.256641	0.89822	0.132582	0.559439	0.292381	0.429925	-1.02853	0.35679
-4.96624	-0.267754	0.0657957	0.962946	0.47219	0.267065	-0.859369	-0.274397	0.56511	-0.341207	0.165687	-0.721116	0.411825	0.304341	0.138867	0.257022	0.898031	0.132275	0.559014	0.292058	0.429847	-1.02853	0.356492
-4.96576	-0.26834	0.0652327	0.962263	0.471756	0.267633	-0.858754	-0.273304	0.565164	-0.341178	0.166081	-0.720976	0.411177	0.304155	0.138645	0.257303	0.897613	0.1322	0.559187	0.291841	0.429747	-1.02843	0.356006
-4.96528	-0.268649	0.06443	0.962471	0.471375	0.268324	-0.859476	-0.273239	0.565258	-0.340808	0.166796	-0.719459	0.410896	0.303737	0.138609	0.257598	0.897987	0.132343	0.559293	0.291614	0.429795	-1.02852	0.355794
-4.9648	-0.26898	0.0636537	0.962703	0.470781	0.26885	-0.859597	-0.273585	0.56528	-0.341161	0.167139	-0.718908	0.410683	0.303751	0.139055	0.257551	0.897741	0.132447	0.559384	0.290914	0.429967	-1.02832	0.355451
-4.96432	-0.269411	0.0628486	0.962823	0.47097	0.269534	-0.85912	-0.274006	0.565307	-0.340741	0.167744	-0.717419	0.410172	0.303736	0.139077	0.257529	0.897793	0.132128	0.559605	0.290932	0.430176	-1.02766	0.355327
-4.96384	-0.269985	0.0623211	0.962615	0.469805	0.269952	-0.859644	-0.273978	0.565316	-0.340644	0.167989	-0.715987	0.410089	0.303642	0.139412	0.257106	0.897554	0.131611	0.559894	0.290845	0.430177	-1.0264	0.355429
-4.96336	-0.27024	0.0620208	0.962028	0.468062	0.27049	-0.860199	-0.274131	0.565322	-0.339683	0.16818	-0.714691	0.409273	0.303646	0.139097	0.257312	0.897275	0.131284	0.559749	0.29062	0.430426	-1.02601	0.35464
-4.96288	-0.270572	0.0616305	0.962052	0.467544	0.27119	-0.85974	-0.273448	0.565419	-0.339984	0.16909	-0.713401	0.408731	0.303678	0.139079	0.257391	0.89741	0.131111	0.5599	0.290675	0.430595	-1.02501	0.354398
-4.9624	-0.27077	0.060901	0.961806	0.467285	0.271445	-0.858299	-0.273197	0.565448	-0.338965	0.169186	-0.711957	0.408352	0.303422	0.139013	0.25785	0.897816	0.130919	0.560211	0.290478	0.430483	-1.02426	0.354078
-4.96192	-0.270331	0.0604793	0.961553	0.467328	0.272022	-0.858305	-0.273014	0.565432	-0.337959	0.169259	-0.70998	0.408314	0.303463	0.139143	0.258286	0.897179	0.130572	0.560465	0.290359	0.431076	-1.02336	0.353839
-4.96144	-0.270944	0.0599921	0.961053	0.467196	0.272779	-0.857283	-0.272776	0.565318	-0.338392	0.169579	-0.709003	0.407996	0.303731	0.139813	0.258609	0.896962	0.130246	0.560484	0.290118	0.430582	-1.02348	0.353688
-4.96096	-0.271389	0.0593863	0.960947	0.466608	0.273203	-0.857408	-0.272898	0.565277	-0.338069	0.169783	-0.708314	0.407613	0.303985	0.139791	0.258886	0.896614	0.130039	0.560838	0.290151	0.430396	-1.02275	0.3533
-4.96048	-0.271914	0.0589389	0.96044	0.46526	0.273993	-0.857307	-0.272894	0.565396	-0.336878	0.170299	-0.707053	0.407104	0.303905	0.139907	0.260001	0.896741	0.129801	0.561243	0.290199	0.430109	-1.02167	0.352819
-4.96	-0.272094	0.0586534	0.960503	0.463863	0.274258	-0.856655	-0.273053	0.565481	-0.336694	0.170681	-0.705561	0.407308	0.304099	0.14046	0.260306	0.896504	0.129424	0.561553	0.289861	0.430198	-1.02163	0.352698
-4.95952	-0.272099	0.0582131	0.960298	0.461896	0.274678	-0.857232	-0.273105	0.565666	-0.336162	0.171018	-0.704756	0.406537	0.303416	0.140967	0.260775	0.896283	0.129007	0.561292	0.289524	0.429992	-1.02128	0.352366
-4.95904	-0.272266	0.0574194	0.960813	0.46124	0.275545	-0.857129	-0.272632	0.565658	-0.335232	0.171898	-0.70349	0.40621	0.303601	0.141067	0.260544	0.896374	0.128634	0.561144	0.289469	0.430284	-1.02023	0.352019
-4.95856	-0.272397	0.0558907	0.960607	0.460929	0.2763	-0.856698	-0.27289	0.565902	-0.334719	0.172377	-0.702115	0.406148	0.303505	0.141392	0.260691	0.896699	0.128031	0.561277	0.289508	0.429989	-1.01976	0.351899
-4.95808	-0.272782	0.05507	0.96057	0.459374	0.276787	-0.856737	-0.27276	0.565979	-0.33521	0.172838	-0.700611	0.405816	0.303636	0.141019	0.260413	0.897286	0.127629	0.56132	0.289541	0.430313	-1.01935	0.351894
-4.9576	-0.271967	0.05456	0.960774	0.459841	0.277204	-0.854743	-0.273003	0.565835	-0.335113	0.172799	-0.698488	0.405837	0.303832	0.141424	0.261007	0.897241	0.127251	0.561241	0.289008	0.430691	-1.01829	0.351535
-4.95712	-0.27263	0.0535226	0.960773	0.459459	0.277964	-0.854449	-0.27316	0.565818	-0.335042	0.172755	-0.69749	0.406057	0.303964	0.141663	0.261369	0.897198	0.127159	0.561474	0.28917	0.430594	-1.01735	0.351496
-4.95664	-0.272499	0.0521565	0.960658	0.459092	0.278539	-0.855054	-0.273001	0.565673	-0.334538	0.173446	-0.697129	0.4066	0.304194	0.141773	0.262365	0.897756	0.126846	0.561313	0.288868	0.430731	-1.01674	0.351114
-4.95616	-0.272883	0.0511784	0.960469	0.458896	0.2795	-0.854091	-0.273094	0.565437	-0.333967	0.173659	-0.696265	0.406113	0.304188	0.141539	0.263065	0.898652	0.126494	0.561113	0.288627	0.430544	-1.0163	0.351064
-4.95568	-0.272815	0.050499	0.960217	0.457956	0.280382	-0.854087	-0.273549	0.565242	-0.333498	0.174031	-0.695186	0.406238	0.304451	0.142054	0.263361	0.898658	0.126301	0.561064	0.288481	0.430286	-1.01597	0.350815
-4.9552	-0.273375	0.0496276	0.960511	0.457876	0.281404	-0.853808	-0.273857	0.565106	-0.334332	0.174731	-0.693849	0.406273	0.30493	0.142443	0.264011	0.899061	0.126377	0.560761	0.288363	0.430064	-1.01539	0.350045
-4.95472	-0.27371	0.0491649	0.960549	0.456918	0.282141	-0.85379	-0.27368	0.565129	-0.334958	0.174857	-0.692252	0.406245	0.305487	0.142735	0.264204	0.89882	0.126127	0.561122	0.287976	0.430093	-1.01486	0.349806
-4.95424	-0.273714	0.0487156	0.960477	0.457011	0.282735	-0.853509	-0.272834	0.56507	-0.335465	0.174756	-0.691344	0.406844	0.305781	0.142508	0.26445	0.899316	0.126025	0.561045	0.28796	0.429976	-1.01414	0.349375
-4.95376	-0.27388	0.0479448	0.96051	0.455752	0.282885	-0.853516	-0.272784	0.564921	-0.335236	0.175158	-0.689518	0.407128	0.306209	0.142523	0.265172	0.899144	0.125667	0.56127	0.287954	0.430016	-1.01395	0.348869
-4.95328	-0.273571	0.0477617	0.960319	0.454572	0.283448	-0.853876	-0.272823	0.564874	-0.335113	0.17563	-0.688361	0.40731	0.306383	0.142727	0.265371	0.899135	0.125539	0.561146	0.287663	0.429666	-1.01335	0.348674
-4.9528	-0.273483	0.0474666	0.96094	0.454293	0.283824	-0.854483	-0.272702	0.565123	-0.33452	0.17584	-0.687196	0.406652	0.306639	0.14289	0.265778	0.898463	0.125424	0.561261	0.287646	0.42983	-1.0129	0.348329
-4.95232	-0.273697	0.0468308	0.961978	0.453896	0.284343	-0.855147	-0.27302	0.565054	-0.335499	0.175738	-0.687294	0.40704	0.306902	0.143022	0.266303	0.898301	0.125317	0.561144	0.287359	0.429609	-1.01258	0.347724
-4.95184	-0.274039	0.0458563	0.962563	0.45252	0.284587	-0.855732	-0.27304	0.564906	-0.335193	0.175579	-0.686426	0.407237	0.306834	0.143283	0.266773	0.898912	0.125095	0.561083	0.287092	0.429623	-1.01255	0.348176
-4.95136	-0.274118	0.0457201	0.963132	0.45135	0.285159	-0.855085	-0.272838	0.564717	-0.336099	0.176041	-0.684684	0.407541	0.307027	0.144357	0.267626	0.898028	0.124827	0.561086	0.286805	0.429399	-1.01247	0.348015
-4.95088	-0.273426	0.045886	0.963859	0.450564	0.285567	-0.854451	-0.271822	0.564522	-0.33652	0.175772	-0.684193	0.4073	0.307286	0.144616	0.267249	0.89805	0.124601	0.561292	0.286286	0.429071	-1.01143	0.347784
-4.9504	-0.273478	0.0454338	0.964119	0.449711	0.285879	-0.854977	-0.27167	0.564375	-0.33763	0.175584	-0.682621	0.407692	0.307641	0.144855	0.267657	0.897808	0.124336	0.561344	0.285847	0.429139	-1.01066	0.347735
-4.94992	-0.273804	0.0452042	0.964468	0.449519	0.286805	-0.854803	-0.271536	0.56416	-0.338551	0.176007	-0.679988	0.408079	0.30794	0.14443	0.267854	0.897624	0.12406	0.561263	0.285395	0.429297	-1.00999	0.347702
-4.94944	-0.273752	0.0450084	0.964907	0.449689	0.287183	-0.8539	-0.270921	0.563957	-0.340093	0.175798	-0.67786	0.408145	0.308298	0.144843	0.268079	0.897981	0.123922	0.561464	0.28505	0.42929	-1.00978	0.347478
-4.94896	-0.273778	0.044752	0.965361	0.448617	0.287833	-0.852201	-0.271604	0.563767	-0.340428	0.175953	-0.675246	0.408972	0.308427	0.145274	0.268588	0.898215	0.123242	0.561533	0.284629	0.429198	-1.009	0.347318
-4.94848	-0.273901	0.0446285	0.965744	0.44855	0.288002	-0.851599	-0.271916	0.563482	-0.340735	0.176132	-0.674277	0.409259	0.30844	0.146064	0.269009	0.898227	0.122955	0.562165	0.28493	0.428761	-1.00873	0.347259
-4.948	-0.273543	0.0445895	0.965268	0.44847	0.288391	-0.850521	-0.271473	0.563346	-0.341677	0.176037	-0.67307	0.409006	0.3085	0.146436	0.268508	0.89741	0.12276	0.562304	0.284922	0.4284	-1.00815	0.347019
-4.94752	-0.27283	0.0440232	0.964935	0.448054	0.288434	-0.848832	-0.270701	0.563112	-0.342557	0.175695	-0.671371	0.40973	0.308943	0.146587	0.268499	0.897341	0.122747	0.562741	0.285082	0.428015	-1.00797	0.346985
-4.94704	-0.272775	0.0434852	0.964909	0.447227	0.288718	-0.848684	-0.270763	0.563075	-0.343317	0.175791	-0.669709	0.410308	0.309348	0.146847	0.268631	0.897744	0.122647	0.563123	0.285084	0.427821	-1.00746	0.346855
-4.94656	-0.273009	0.0432687	0.964566	0.446967	0.289271	-0.847103	-0.270659	0.563111	-0.344421	0.175764	-0.667818	0.411038	0.309215	0.147868	0.268154	0.897808	0.122575	0.563073	0.284909	0.427734	-1.00727	0.346455
-4.94608	-0.272568	0.0428003	0.965632	0.446964	0.290022	-0.846855	-0.269288	0.562905	-0.345779	0.176055	-0.666723	0.411523	0.30971	0.147943	0.268437	0.898439	0.122373	0.563076	0.284388	0.427358	-1.00696	0.346251
-4.9456	-0.272353	0.0425438	0.966612	0.447553	0.290173	-0.8467	-0.268855	0.56261	-0.346854	0.175991	-0.664509	0.412204	0.310042	0.148416	0.26847	0.898804	0.122143	0.562952	0.284668	0.426923	-1.00652	0.346176
-4.94512	-0.272625	0.0426017	0.966595	0.447908	0.29049	-0.845316	-0.268575	0.562579	-0.347157	0.175711	-0.662861	0.412574	0.310164	0.14881	0.269083	0.89818	0.12224	0.563409	0.284548	0.427033	-1.00596	0.346085
-4.94464	-0.272877	0.0420008	0.966945	0.447798	0.290807	-0.845075	-0.268043	0.562378	-0.348208	0.175658	-0.660632	0.41268	0.310337	0.149547	0.269205	0.897948	0.122232	0.563482	0.28413	0.426574	-1.00613	0.34587
-4.94416	-0.272236	0.0412795	0.967066	0.446341	0.291613	-0.845077	-0.267563	0.562084	-0.349334	0.175847	-0.658077	0.413272	0.31044	0.149713	0.269769	0.897615	0.122523	0.564	0.284185	0.426189	-1.00633	0.34532
-4.94368	-0.271807	0.0404984	0.967107	0.446638	0.291915	-0.843734	-0.266579	0.561916	-0.350039	0.176271	-0.656166	0.413299	0.310878	0.150166	0.269652	0.897395	0.12241	0.564129	0.284304	0.42583	-1.00592	0.345255
-4.9432	-0.271894	0.0398024	0.966859	0.446288	0.292439	-0.842448	-0.266368	0.561886	-0.35086	0.17661	-0.653973	0.413375	0.310957	0.150552	0.269642	0.897603	0.122458	0.564201	0.284164	0.425931	-1.00611	0.345184
-4.94272	-0.271497	0.0394405	0.967512	0.446332	0.292454	-0.842344	-0.265619	0.561586	-0.351764	0.176888	-0.652108	0.414282	0.311065	0.150497	0.270492	0.897682	0.122652	0.564867	0.28413	0.425624	-1.00675	0.345546
-4.94224	-0.271211	0.0387258	0.967859	0.44565	0.292642	-0.842887	-0.264806	0.561409	-0.352116	0.176905	-0.650402	0.414503	0.311258	0.150842	0.270603	0.897472	0.122877	0.564768	0.28366	0.425545	-1.00669	0.34578
-4.94176	-0.270901	0.0376594	0.968617	0.445716	0.292937	-0.842295	-0.264277	0.561303	-0.351832	0.176893	-0.649269	0.415089	0.311318	0.151254	0.270753	0.89714	0.12306	0.564987	0.28375	0.425527	-1.00682	0.345517
-4.94128	-0.27064	0.0366938	0.969404	0.447387	0.292911	-0.841098	-0.263716	0.561265	-0.351538	0.177161	-0.647834	0.415021	0.311695	0.151703	0.270951	0.897351	0.123225	0.565247	0.283212	0.425346	-1.00664	0.345481
-4.9408	-0.270148	0.0365033	0.970164	0.446789	0.293284	-0.841061	-0.262961	0.56103	-0.351037	0.17784	-0.646937	0.415963	0.311929	0.15174	0.271388	0.896764	0.123394	0.565435	0.283082	0.42515	-1.00674	0.345356
-4.94032	-0.269898	0.0356488	0.97109	0.44737	0.293803	-0.839168	-0.262361	0.560754	-0.350729	0.178159	-0.645697	0.415767	0.311816	0.151869	0.271035	0.896564	0.123495	0.565681	0.283069	0.425159	-1.00717	0.345305
-4.93984	-0.269042	0.0347887	0.971755	0.449161	0.294151	-0.838	-0.261494	0.560615	-0.350445	0.178631	-0.643988	0.415518	0.311837	0.151933	0.271514	0.896299	0.123675	0.565668	0.282683	0.424663	-1.00745	0.344954
-4.93936	-0.268813	0.0342165	0.972663	0.44918	0.293875	-0.837299	-0.260286	0.560309	-0.350172	0.179239	-0.642742	0.416268	0.311523	0.152502	0.271147	0.895819	0.12382	0.565829	0.282377	0.424438	-1.00761	0.345161
-4.93888	-0.268883	0.033702	0.973653	0.449255	0.293981	-0.836286	-0.260026	0.560008	-0.349474	0.179425	-0.641117	0.416516	0.311201	0.1526	0.271274	0.896047	0.123724	0.566146	0.282232	0.423798	-1.00736	0.344599
-4.9384	-0.268585	0.0334344	0.974109	0.449997	0.294397	-0.835708	-0.259698	0.559967	-0.348749	0.179416	-0.640033	0.417596	0.311245	0.152759	0.271394	0.896496	0.123714	0.56618	0.281879	0.423522	-1.00797	0.344508
-4.93792	-0.267489	0.0329377	0.974847	0.450906	0.295323	-0.834642	-0.259109	0.559693	-0.348457	0.179957	-0.63874	0.417414	0.311097	0.152346	0.271333	0.896394	0.12382	0.566436	0.282144	0.423029	-1.00803	0.344539
-4.93744	-0.266543	0.032739	0.974833	0.451921	0.295524	-0.833868	-0.258369	0.559437	-0.348144	0.180977	-0.637915	0.417931	0.311354	0.151674	0.270883	0.896154	0.124054	0.566834	0.282135	0.422654	-1.00834	0.344072
-4.93696	-0.266299	0.0316876	0.975102	0.452317	0.296348	-0.834213	-0.25742	0.559097	-0.347183	0.180709	-0.637185	0.418247	0.311124	0.151694	0.270541	0.896268	0.123915	0.567201	0.28215	0.422364	-1.00839	0.344223
-4.93648	-0.265563	0.0306809	0.975231	0.453305	0.29711	-0.833879	-0.256479	0.55893	-0.347297	0.180946	-0.636367	0.418439	0.311079	0.151345	0.270663	0.895333	0.123624	0.567797	0.282055	0.421998	-1.00902	0.344342
-4.936	-0.265013	0.0300085	0.9754	0.45495	0.297635	-0.83373	-0.25606	0.558718	-0.346627	0.18045	-0.635669	0.418535	0.310935	0.151332	0.270136	0.894878	0.123433	0.568185	0.282286	0.422269	-1.00904	0.343942
-4.93552	-0.264815	0.0295994	0.976087	0.455682	0.297886	-0.833358	-0.255307	0.558368	-0.345821	0.18066	-0.634433	0.418515	0.310615	0.151338	0.270719	0.893901	0.123604	0.568814	0.282357	0.421903	-1.00884	0.343566
-4.93504	-0.264596	0.0286298	0.976104	0.457167	0.298214	-0.832552	-0.254427	0.558268	-0.344671	0.180421	-0.633382	0.418584	0.310673	0.151198	0.27109	0.894075	0.123819	0.569361	0.282288	0.421487	-1.00917	0.343798
-4.93456	-0.264903	0.028137	0.975643	0.457756	0.298543	-0.832953	-0.254267	0.558145	-0.343644	0.180299	-0.632257	0.418634	0.310629	0.150293	0.271313	0.893947	0.12402	0.569475	0.282094	0.421123	-1.00968	0.343574
-4.93408	-0.264567	0.0277475	0.974666	0.459103	0.299389	-0.833052	-0.253426	0.557856	-0.343343	0.180085	-0.629847	0.418285	0.31065	0.150245	0.270712	0.893999	0.123773	0.569631	0.281654	0.420924	-1.01022	0.343726
-4.9336	-0.264352	0.0274164	0.97443	0.459897	0.299525	-0.832166	-0.25271	0.557666	-0.342884	0.179986	-0.627488	0.417929	0.310788	0.149612	0.270466	0.894563	0.123686	0.569852	0.281818	0.420611	-1.01051	0.343704
-4.93312	-0.264196	0.0270494	0.974442	0.459834	0.299307	-0.833069	-0.252548	0.557693	-0.343157	0.180225	-0.62712	0.417938	0.310546	0.149164	0.270708	0.894862	0.123458	0.569809	0.281734	0.420344	-1.01073	0.34354
-4.93264	-0.264827	0.0262894	0.974519	0.459309	0.299522	-0.832493	-0.252119	0.557522	-0.342974	0.180763	-0.625577	0.417921	0.310369	0.149084	0.270698	0.895275	0.123361	0.570031	0.281948	0.420035	-1.01085	0.343465
-4.93216	-0.264467	0.0256932	0.97475	0.459591	0.300013	-0.832231	-0.25152	0.557551	-0.34215	0.180806	-0.625127	0.418343	0.310055	0.14903	0.27072	0.895072	0.123381	0.569995	0.282096	0.419589	-1.01078	0.342984
-4.93168	-0.264311	0.0257851	0.974283	0.460562	0.300171	-0.832242	-0.251398	0.557217	-0.342127	0.180807	-0.624973	0.418832	0.310057	0.149199	0.271103	0.895577	0.123539	0.570114	0.282027	0.419274	-1.01129	0.342766
-4.9312	-0.263522	0.0252294	0.974288	0.461636	0.300556	-0.832105	-0.250479	0.556772	-0.341893	0.180905	-0.623996	0.418646	0.310157	0.148986	0.271154	0.895479	0.123508	0.570092	0.281843	0.419429	-1.0109	0.342326
-4.93072	-0.263658	0.0248185	0.975092	0.462265	0.300425	-0.832283	-0.249674	0.556396	-0.342047	0.180829	-0.622751	0.418646	0.310191	0.148821	0.271369	0.895457	0.123876	0.570311	0.281955	0.419427	-1.01123	0.341915
-4.93024	-0.263488	0.0243457	0.975663	0.462412	0.300317	-0.830698	-0.249096	0.556178	-0.341324	0.180756	-0.622961	0.418004	0.310254	0.148563	0.270841	0.895529	0.123934	0.570593	0.281696	0.419677	-1.01107	0.341339
-4.92976	-0.262454	0.0242143	0.975434	0.462419	0.300346	-0.830751	-0.24785	0.556032	-0.340855	0.180248	-0.62198	0.417625	0.310017	0.148304	0.270903	0.89486	0.124053	0.570681	0.281603	0.419049	-1.01137	0.341141
-4.92928	-0.261813	0.0233092	0.97577	0.462599	0.2998	-0.830602	-0.247858	0.555816	-0.341068	0.179891	-0.620911	0.417481	0.309614	0.148433	0.270671	0.894243	0.12417	0.570771	0.281355	0.419167	-1.01177	0.340691
-4.9288	-0.261487	0.022671	0.976038	0.46441	0.300078	-0.830406	-0.247105	0.55574	-0.340625	0.180125	-0.620263	0.417758	0.309545	0.148293	0.270858	0.894313	0.123805	0.571222	0.281498	0.418857	-1.01261	0.340315
-4.92832	-0.26221	0.0222581	0.975981	0.464601	0.300202	-0.829606	-0.245905	0.555526	-0.340116	0.180091	-0.620093	0.417865	0.309404	0.147827	0.270844	0.89417	0.123437	0.571291	0.281504	0.418848	-1.01314	0.33982
-4.92784	-0.262245	0.0219428	0.976152	0.465357	0.300148	-0.829654	-0.244917	0.555156	-0.339288	0.180597	-0.619025	0.418532	0.309305	0.147049	0.270931	0.893791	0.123649	0.571034	0.281301	0.418813	-1.01292	0.339134
-4.92736	-0.261316	0.021854	0.976616	0.465743	0.300595	-0.830017	-0.244735	0.554909	-0.338845	0.180183	-0.61818	0.417872	0.309112	0.146754	0.270959	0.893784	0.123494	0.571184	0.280841	0.418731	-1.01318	0.338794
-4.92688	-0.260053	0.0214941	0.976799	0.466155	0.300696	-0.830567	-0.244173	0.554636	-0.338556	0.180408	-0.618079	0.417411	0.309374	0.146254	0.270824	0.894138	0.123487	0.571245	0.280393	0.418608	-1.01349	0.338442
-4.9264	-0.259178	0.021094	0.976596	0.465896	0.300808	-0.829445	-0.243522	0.554271	-0.338648	0.18035	-0.618447	0.417133	0.309016	0.14628	0.270524	0.894408	0.123465	0.571286	0.280417	0.418465	-1.01355	0.338336
-4.92592	-0.25908	0.0211185	0.976456	0.466871	0.301093	-0.827988	-0.24292	0.554107	-0.339603	0.180302	-0.618451	0.417235	0.308859	0.145745	0.26966	0.893503	0.12353	0.5714	0.280647	0.418256	-1.0137	0.337772
-4.92544	-0.258162	0.0211997	0.975652	0.468332	0.301346	-0.827041	-0.242172	0.55397	-0.339997	0.180434	-0.61841	0.416873	0.308923	0.145839	0.269269	0.893459	0.123288	0.571938	0.280534	0.418033	-1.01391	0.337113
-4.92496	-0.257198	0.0213286	0.975591	0.469496	0.301762	-0.826954	-0.242145	0.553672	-0.340255	0.180482	-0.616633	0.416964	0.30928	0.145625	0.268961	0.893062	0.123182	0.572407	0.280159	0.417757	-1.01445	0.336709
-4.92448	-0.257381	0.0206987	0.975977	0.469952	0.302291	-0.825997	-0.241118	0.553533	-0.340231	0.180495	-0.617512	0.416431	0.309406	0.145028	0.268807	0.892737	0.122997	0.572908	0.279922	0.417955	-1.01456	0.336341
-4.924	-0.25698	0.0199578	0.97583	0.470404	0.302418	-0.824603	-0.24094	0.553245	-0.340253	0.180569	-0.617999	0.416848	0.309399	0.145021	0.268938	0.892065	0.123164	0.573015	0.27973	0.417693	-1.01481	0.335901
-4.92352	-0.256	0.0186069	0.975618	0.470811	0.30322	-0.823392	-0.2414	0.553063	-0.339847	0.180766	-0.617464	0.41624	0.309211	0.144649	0.268911	0.892205	0.123235	0.573247	0.279906	0.417255	-1.0149	0.335606
-4.92304	-0.256206	0.018193	0.975316	0.471873	0.303539	-0.822856	-0.240954	0.552885	-0.340534	0.180823	-0.616785	0.415892	0.308883	0.144615	0.269145	0.892101	0.123236	0.573444	0.280168	0.416924	-1.01444	0.335472
-4.92256	-0.255177	0.0171409	0.975752	0.473235	0.303991	-0.822597	-0.239956	0.552589	-0.340907	0.180764	-0.615671	0.415379	0.308313	0.143911	0.269469	0.891734	0.123049	0.573559	0.279804	0.416421	-1.01472	0.335109
-4.92208	-0.254292	0.0170688	0.975582	0.473495	0.304316	-0.821277	-0.239659	0.552375	-0.340262	0.180493	-0.615497	0.415248	0.308026	0.143856	0.268882	0.891489	0.12294	0.573958	0.279903	0.416393	-1.01446	0.335013
-4.9216	-0.254206	0.0167241	0.976036	0.474756	0.304957	-0.820747	-0.238346	0.552152	-0.340124	0.180741	-0.613824	0.414557	0.307927	0.143567	0.269212	0.891053	0.122925	0.574331	0.279878	0.41592	-1.01431	0.334527
-4.92112	-0.253897	0.0158013	0.976819	0.474966	0.305361	-0.82016	-0.238689	0.552137	-0.340533	0.181218	-0.613547	0.413618	0.307813	0.143267	0.269323	0.891116	0.12305	0.574402	0.279873	0.415661	-1.01539	0.334184
-4.92064	-0.252887	0.0150877	0.976741	0.475172	0.305559	-0.820467	-0.238531	0.551871	-0.33976	0.181266	-0.613003	0.413686	0.307646	0.142958	0.268979	0.892263	0.12316	0.574759	0.279768	0.415811	-1.0153	0.333828
-4.92016	-0.252678	0.0143558	0.977502	0.474759	0.305693	-0.820174	-0.237887	0.551726	-0.3403	0.181897	-0.6117	0.413303	0.307438	0.142675	0.268814	0.891998	0.123049	0.574787	0.279895	0.416046	-1.01524	0.33364
-4.91968	-0.252619	0.0140335	0.977648	0.475555	0.30561	-0.819772	-0.237283	0.55141	-0.340096	0.181938	-0.611253	0.412683	0.307314	0.142072	0.268419	0.891405	0.123001	0.575387	0.279908	0.416125	-1.01483	0.333239
-4.9192	-0.253547	0.0139217	0.978032	0.476664	0.305796	-0.819038	-0.237063	0.551143	-0.340929	0.182304	-0.609933	0.412626	0.307493	0.142189	0.268156	0.891506	0.123109	0.576119	0.279742	0.416073	-1.0151	0.333093
-4.91872	-0.253305	0.0134671	0.978197	0.477499	0.305772	-0.818717	-0.236695	0.551217	-0.340644	0.182292	-0.608841	0.412221	0.307486	0.142735	0.267896	0.891079	0.123287	0.576137	0.280127	0.415811	-1.01465	0.33311
-4.91824	-0.253547	0.0126161	0.978002	0.477648	0.305347	-0.818124	-0.236007	0.550927	-0.340398	0.182947	-0.607823	0.411832	0.307462	0.142396	0.267628	0.890742	0.123056	0.576294	0.280452	0.415565	-1.0155	0.332915
-4.91776	-0.253139	0.0116431	0.978443	0.477848	0.305226	-0.817383	-0.236013	0.550482	-0.340014	0.183591	-0.606187	0.411604	0.307418	0.142459	0.26756	0.890757	0.123082	0.576634	0.280421	0.415065	-1.01643	0.332821
-4.91728	-0.254302	0.0104954	0.97861	0.478256	0.305546	-0.817261	-0.235965	0.550295	-0.34003	0.183541	-0.603917	0.411822	0.307361	0.142152	0.267057	0.891304	0.122992	0.576947	0.280216	0.414779	-1.01638	0.332462
-4.9168	-0.254246	0.00997654	0.978343	0.478307	0.305425	-0.817363	-0.235349	0.550051	-0.33965	0.183253	-0.602326	0.411537	0.307216	0.14197	0.267137	0.891635	0.122882	0.577059	0.280337	0.414647	-1.01674	0.332569
-4.91632	-0.25455	0.00958156	0.978709	0.478485	0.30621	-0.816887	-0.234556	0.549732	-0.338926	0.183488	-0.601825	0.411372	0.30764	0.141784	0.266379	0.891117	0.122595	0.577152	0.280132	0.414725	-1.01678	0.332083
-4.91584	-0.25453	0.00879527	0.979419	0.478897	0.306153	-0.816523	-0.233773	0.549397	-0.338384	0.183383	-0.600276	0.411606	0.307584	0.14171	0.266135	0.890733	0.122433	0.577528	0.280145	0.414642	-1.01731	0.332182
-4.91536	-0.25408	0.00898853	0.979912	0.478582	0.30642	-0.816339	-0.232811	0.549206	-0.338152	0.18389	-0.598941	0.411793	0.307628	0.141988	0.266021	0.890617	0.122119	0.577943	0.280075	0.414822	-1.01733	0.332118
-4.91488	-0.253296	0.00810202	0.980276	0.478837	0.306329	-0.815897	-0.231599	0.548828	-0.337989	0.184004	-0.596971	0.411925	0.306966	0.141631	0.266191	0.890632	0.121723	0.578267	0.279461	0.41463	-1.01785	0.331768
-4.9144	-0.252694	0.00637308	0.980972	0.478316	0.306039	-0.815434	-0.231296	0.548749	-0.338528	0.184017	-0.595471	0.411881	0.306361	0.14221	0.265851	0.891046	0.121534	0.57835	0.27934	0.414498	-1.01769	0.331757
-4.91392	-0.252215	0.00582123	0.9808	0.478372	0.306263	-0.814658	-0.231107	0.548609	-0.338314	0.183659	-0.594214	0.411599	0.306317	0.142492	0.265136	0.891229	0.121415	0.578907	0.279344	0.414253	-1.0185	0.331349
-4.91344	-0.252123	0.00507487	0.981213	0.479352	0.306397	-0.814193	-0.229642	0.54838	-0.337812	0.183842	-0.593612	0.41125	0.306211	0.142985	0.265093	0.891148	0.121272	0.579518	0.27912	0.414035	-1.01903	0.331146
-4.91296	-0.251912	0.00427995	0.981538	0.479711	0.305856	-0.813636	-0.22892	0.548082	-0.338151	0.18404	-0.59254	0.410794	0.306064	0.143011	0.265111	0.890541	0.121252	0.579827	0.279411	0.414095	-1.01957	0.330966
-4.91248	-0.251452	0.00383876	0.981837	0.479835	0.305512	-0.812415	-0.22818	0.547791	-0.337832	0.184094	-0.59181	0.410193	0.305903	0.142683	0.265177	0.890774	0.120937	0.580563	0.279747	0.41405	-1.02024	0.330896
-4.912	-0.251383	0.00390557	0.982309	0.478805	0.305211	-0.811699	-0.226792	0.547675	-0.338015	0.184364	-0.590574	0.410088	0.305801	0.142863	0.264863	0.890743	0.12051	0.581291	0.279614	0.413745	-1.02077	0.331013
-4.91152	-0.251049	0.0037834	0.982144	0.477905	0.305158	-0.811861	-0.225459	0.547501	-0.338353	0.183837	-0.590575	0.410277	0.306066	0.14319	0.264518	0.890961	0.120123	0.581627	0.279538	0.413788	-1.02128	0.331008
-4.91104	-0.250672	0.00338695	0.983343	0.477514	0.305033	-0.811118	-0.224431	0.547665	-0.338244	0.184278	-0.590275	0.410158	0.306736	0.142892	0.264308	0.88996	0.119955	0.581716	0.279484	0.413656	-1.02192	0.330709
-4.91056	-0.250512	0.00233124	0.984243	0.477079	0.305194	-0.810588	-0.22347	0.547686	-0.338205	0.183667	-0.589748	0.409758	0.307082	0.143297	0.264129	0.88915	0.119685	0.581996	0.279238	0.413626	-1.02211	0.330841
-4.91008	-0.25003	0.00141664	0.984343	0.475846	0.305111	-0.811275	-0.22211	0.54744	-0.338939	0.183544	-0.588424	0.409008	0.307648	0.143484	0.264577	0.889249	0.119654	0.582307	0.278842	0.41335	-1.02236	0.33049
-4.9096	-0.249085	0.00047452	0.984252	0.475539	0.305063	-0.811079	-0.22103	0.547427	-0.339113	0.183321	-0.587611	0.408387	0.307508	0.143464	0.264833	0.889107	0.119209	0.583071	0.278709	0.412838	-1.02298	0.32981
-4.90912	-0.248244	-0.00069923	0.98436	0.475697	0.304666	-0.811228	-0.220366	0.547384	-0.340078	0.183251	-0.585991	0.408412	0.307069	0.143603	0.263924	0.889421	0.118872	0.583341	0.278758	0.412719	-1.02291	0.329684
-4.90864	-0.247571	-0.00158613	0.984135	0.475733	0.304391	-0.811452	-0.219405	0.547391	-0.340433	0.182847	-0.583988	0.407848	0.306799	0.143829	0.263589	0.889125	0.118676	0.58432	0.279039	0.412315	-1.02282	0.32916
-4.90816	-0.247629	-0.00260373	0.983831	0.476305	0.304613	-0.809891	-0.218497	0.547248	-0.340351	0.182343	-0.582947	0.407667	0.306607	0.143517	0.263651	0.888839	0.118479	0.585004	0.27872	0.412104	-1.02261	0.3288
-4.90768	-0.247382	-0.00309518	0.984296	0.476023	0.304694	-0.809706	-0.217666	0.547133	-0.340646	0.182973	-0.582335	0.407697	0.306298	0.14346	0.263716	0.888826	0.118141	0.585018	0.278428	0.411513	-1.02214	0.328327
-4.9072	-0.246997	-0.00356254	0.984004	0.47597	0.305118	-0.808579	-0.217121	0.54718	-0.340818	0.183688	-0.581608	0.407223	0.306053	0.14355	0.263972	0.888938	0.118052	0.584821	0.27874	0.410967	-1.0222	0.328017
-4.90672	-0.247776	-0.00508203	0.984469	0.475677	0.305622	-0.807286	-0.21606	0.546977	-0.340492	0.182961	-0.579951	0.407234	0.306068	0.143614	0.263829	0.888641	0.118168	0.585049	0.278912	0.410628	-1.02204	0.328043
-4.90624	-0.247915	-0.00544878	0.984607	0.475721	0.305896	-0.805054	-0.215147	0.54679	-0.340534	0.182803	-0.578859	0.407164	0.306076	0.143347	0.263787	0.888386	0.117888	0.584688	0.279139	0.410405	-1.02247	0.327656
-4.90576	-0.2477	-0.00617771	0.984341	0.475006	0.306234	-0.804115	-0.214114	0.546878	-0.340313	0.182248	-0.577661	0.405873	0.306627	0.143752	0.264139	0.887922	0.117754	0.584676	0.278909	0.41014	-1.02285	0.327769
-4.90528	-0.247174	-0.00713698	0.98404	0.475385	0.306537	-0.802614	-0.212899	0.546816	-0.339428	0.182985	-0.576472	0.405591	0.306769	0.143677	0.264175	0.887651	0.11775	0.585165	0.279126	0.409383	-1.0227	0.327235
-4.9048	-0.247516	-0.00784131	0.984338	0.474996	0.306666	-0.801987	-0.212511	0.546773	-0.338259	0.183009	-0.575257	0.405383	0.306956	0.142926	0.264175	0.887068	0.117395	0.584972	0.27902	0.40881	-1.02232	0.326682
-4.90432	-0.247754	-0.00868553	0.984976	0.475283	0.307379	-0.800821	-0.211033	0.546594	-0.338038	0.18302	-0.573791	0.404768	0.307308	0.142059	0.264378	0.886944	0.11741	0.584716	0.278717	0.408634	-1.02303	0.326146
-4.90384	-0.247115	-0.00995472	0.985329	0.475581	0.307597	-0.800294	-0.210187	0.546533	-0.33742	0.183433	-0.573442	0.40423	0.307982	0.142225	0.26417	0.886723	0.117117	0.584473	0.278583	0.40845	-1.02287	0.326185
-4.90336	-0.24715	-0.0109816	0.98574	0.476308	0.308064	-0.798216	-0.208814	0.546458	-0.33673	0.184384	-0.572899	0.40364	0.308869	0.14251	0.264356	0.886321	0.116793	0.584652	0.278619	0.408129	-1.02359	0.32563
-4.90288	-0.247521	-0.0111826	0.985665	0.477573	0.308259	-0.797272	-0.208169	0.54624	-0.33668	0.184937	-0.570486	0.404055	0.308746	0.142437	0.26459	0.885715	0.116644	0.584608	0.278748	0.407793	-1.02329	0.325707
-4.9024	-0.247442	-0.0118984	0.98495	0.47805	0.308717	-0.797044	-0.207888	0.545992	-0.336329	0.185078	-0.568544	0.403554	0.308616	0.142892	0.264233	0.885563	0.116626	0.585068	0.278791	0.407636	-1.02341	0.325319
-4.90192	-0.247596	-0.0135687	0.984993	0.478459	0.309851	-0.796933	-0.208329	0.545922	-0.336511	0.185887	-0.567149	0.403879	0.308839	0.14285	0.263997	0.885002	0.116597	0.584826	0.27852	0.407569	-1.02364	0.324581
-4.90144	-0.246871	-0.0141345	0.984585	0.478313	0.310306	-0.796077	-0.207914	0.545918	-0.336345	0.185862	-0.565772	0.402857	0.308893	0.143092	0.263678	0.885424	0.1164	0.584621	0.278396	0.406981	-1.0235	0.324489
-4.90096	-0.246798	-0.0150398	0.985396	0.477649	0.310824	-0.795383	-0.207419	0.54559	-0.335815	0.186136	-0.563773	0.402064	0.308917	0.142857	0.263598	0.884951	0.116147	0.585178	0.278382	0.406295	-1.0238	0.324513
-4.90048	-0.246462	-0.0154149	0.985726	0.477418	0.311426	-0.794208	-0.207316	0.545351	-0.335532	0.186212	-0.563085	0.400894	0.309294	0.142977	0.263707	0.884268	0.116071	0.585544	0.278301	0.406211	-1.02413	0.32472
-4.9	-0.245976	-0.0159002	0.98585	0.478251	0.311875	-0.793688	-0.206912	0.545007	-0.335047	0.186749	-0.56116	0.400622	0.310061	0.14286	0.263922	0.884036	0.115688	0.585767	0.277967	0.406076	-1.0237	0.325058
-4.89952	-0.24583	-0.0167497	0.986262	0.478121	0.311715	-0.792882	-0.2058	0.544775	-0.334756	0.186999	-0.5585	0.400112	0.310118	0.143156	0.264606	0.883773	0.11561	0.585772	0.277275	0.405499	-1.02383	0.325151
-4.89904	-0.244684	-0.0173965	0.985874	0.478269	0.312213	-0.791792	-0.205438	0.544623	-0.333676	0.18789	-0.558326	0.399723	0.310047	0.143009	0.265346	0.883573	0.115512	0.58601	0.276844	0.405101	-1.02366	0.32468
-4.89856	-0.244384	-0.0182248	0.986459	0.479504	0.312809	-0.790555	-0.205521	0.544633	-0.333189	0.188078	-0.556056	0.399629	0.310319	0.142926	0.26582	0.88349	0.115366	0.585987	0.276692	0.404407	-1.02351	0.323982
-4.89808	-0.244525	-0.0187959	0.986422	0.479501	0.312756	-0.790242	-0.205581	0.544472	-0.332765	0.187841	-0.554703	0.39932	0.310261	0.143271	0.266043	0.883623	0.115593	0.586259	0.276646	0.404066	-1.02353	0.324173
-4.8976	-0.24448	-0.0192345	0.986034	0.480303	0.312703	-0.78933	-0.204782	0.544204	-0.332506	0.187919	-0.551143	0.39908	0.310287	0.142967	0.266578	0.883761	0.115451	0.586115	0.276616	0.403641	-1.02336	0.32396
-4.89712	-0.244935	-0.0194192	0.986167	0.480862	0.313102	-0.787997	-0.204067	0.543976	-0.332555	0.18772	-0.546885	0.398507	0.310476	0.14286	0.266563	0.883336	0.115134	0.586041	0.27639	0.403578	-1.02335	0.323613
-4.89664	-0.245038	-0.0193937	0.986231	0.480353	0.313417	-0.787453	-0.203011	0.543771	-0.332365	0.187847	-0.54373	0.397512	0.310898	0.142641	0.266847	0.882757	0.11496	0.58618	0.275799	0.402953	-1.02372	0.323278
-4.89616	-0.24457	-0.0207402	0.986011	0.480421	0.313484	-0.787723	-0.202955	0.543563	-0.330988	0.188326	-0.541315	0.397311	0.310775	0.141955	0.266569	0.882129	0.114734	0.586164	0.275911	0.402473	-1.02426	0.322953
-4.89568	-0.245318	-0.0206306	0.98551	0.481199	0.313772	-0.78795	-0.202331	0.543512	-0.331023	0.189143	-0.539682	0.396964	0.31085	0.14148	0.266628	0.881851	0.114437	0.585879	0.275849	0.402172	-1.02455	0.322979
-4.8952	-0.244943	-0.0208925	0.98564	0.481458	0.314229	-0.786932	-0.201349	0.543642	-0.33049	0.189192	-0.538313	0.396269	0.311306	0.14118	0.266926	0.881408	0.113868	0.585958	0.275642	0.401867	-1.02483	0.323
-4.89472	-0.244301	-0.0211211	0.985383	0.482105	0.314962	-0.785864	-0.201182	0.543623	-0.329515	0.189133	-0.535426	0.395706	0.311533	0.141497	0.267239	0.881166	0.113478	0.586568	0.275777	0.401541	-1.02532	0.322515
-4.89424	-0.244136	-0.0213512	0.985461	0.481915	0.315201	-0.784789	-0.200197	0.543485	-0.328397	0.189631	-0.53229	0.394929	0.311774	0.14163	0.267267	0.880497	0.113235	0.586591	0.275796	0.401417	-1.02529	0.3221
-4.89376	-0.243416	-0.0213883	0.985273	0.482143	0.315969	-0.784101	-0.199998	0.54316	-0.328732	0.189656	-0.529828	0.393879	0.311774	0.141516	0.267108	0.879602	0.113205	0.586752	0.275667	0.400784	-1.02411	0.321816
-4.89328	-0.243942	-0.0214895	0.984599	0.48114	0.31594	-0.783382	-0.198872	0.542879	-0.328865	0.190122	-0.527321	0.393434	0.311903	0.140971	0.267288	0.87933	0.112781	0.586325	0.27587	0.40053	-1.02372	0.321449
-4.8928	-0.244412	-0.0219056	0.984545	0.480756	0.316224	-0.783023	-0.19865	0.542666	-0.328589	0.190138	-0.525909	0.393299	0.31195	0.140416	0.266889	0.8796	0.112379	0.586523	0.276109	0.400335	-1.02475	0.321446
-4.89232	-0.24504	-0.0221636	0.984703	0.481008	0.316753	-0.782726	-0.197621	0.542639	-0.328932	0.190324	-0.524335	0.392731	0.312106	0.140488	0.266681	0.879206	0.112025	0.586533	0.2758	0.40043	-1.02453	0.320663
-4.89184	-0.245258	-0.0220538	0.984279	0.481603	0.317225	-0.78195	-0.196883	0.542435	-0.328595	0.191034	-0.520881	0.392214	0.312356	0.140025	0.266721	0.878908	0.111518	0.586541	0.275755	0.400644	-1.02353	0.320608
-4.89136	-0.244922	-0.0221242	0.984442	0.481592	0.317672	-0.782308	-0.196242	0.542505	-0.329262	0.191618	-0.519319	0.391777	0.312671	0.13986	0.267094	0.878881	0.110783	0.586523	0.275796	0.400522	-1.0237	0.320367
-4.89088	-0.244794	-0.0220651	0.984364	0.481733	0.318169	-0.78197	-0.195377	0.542343	-0.329117	0.192144	-0.51765	0.389993	0.312899	0.139471	0.267052	0.878787	0.110886	0.586574	0.275785	0.400134	-1.02398	0.320182
-4.8904	-0.244351	-0.0220921	0.984238	0.482423	0.318579	-0.781674	-0.194923	0.542255	-0.328257	0.192125	-0.515661	0.388295	0.312906	0.13923	0.267096	0.878936	0.110534	0.58651	0.276217	0.399845	-1.02333	0.319828
-4.88992	-0.245329	-0.0225965	0.98415	0.48243	0.319437	-0.780742	-0.194779	0.542437	-0.327953	0.192487	-0.5149	0.38801	0.312858	0.138939	0.267345	0.878603	0.110258	0.586581	0.276331	0.399735	-1.02346	0.319769
-4.88944	-0.244586	-0.0226018	0.983665	0.482352	0.319862	-0.7808	-0.194425	0.542294	-0.326232	0.19274	-0.513451	0.387598	0.313021	0.13851	0.267636	0.878374	0.109883	0.586407	0.276482	0.399775	-1.02301	0.319273
-4.88896	-0.244856	-0.0227754	0.982998	0.48363	0.320383	-0.780109	-0.193615	0.542455	-0.326103	0.193114	-0.511727	0.386092	0.313164	0.137721	0.267996	0.878686	0.109281	0.586238	0.276475	0.39971	-1.02261	0.318697
-4.88848	-0.245161	-0.02333	0.983095	0.483408	0.320871	-0.778699	-0.192954	0.542416	-0.325593	0.192984	-0.509968	0.385044	0.313226	0.137826	0.267699	0.878175	0.109181	0.586044	0.276541	0.399406	-1.02257	0.317995
-4.888	-0.24538	-0.0230075	0.982862	0.483552	0.321922	-0.778378	-0.192684	0.542396	-0.325365	0.192893	-0.507529	0.383892	0.313363	0.138068	0.267854	0.877615	0.10878	0.586027	0.276492	0.399162	-1.02222	0.317785
-4.88752	-0.245391	-0.0234382	0.982633	0.484921	0.322567	-0.778141	-0.191296	0.542279	-0.324931	0.193443	-0.505694	0.382709	0.313227	0.138011	0.268115	0.877303	0.108409	0.586086	0.27611	0.398531	-1.02161	0.317592
-4.88704	-0.244949	-0.023138	0.982563	0.484602	0.323134	-0.777315	-0.190175	0.54202	-0.324452	0.194185	-0.503368	0.381962	0.312848	0.138031	0.268028	0.877041	0.108208	0.586134	0.275631	0.398666	-1.02172	0.317492
-4.88656	-0.245037	-0.0231813	0.982279	0.486462	0.323395	-0.777227	-0.189453	0.541842	-0.324305	0.194872	-0.50136	0.381084	0.312916	0.13776	0.268237	0.876084	0.107702	0.586052	0.275535	0.398739	-1.02218	0.317138
-4.88608	-0.244594	-0.0232198	0.982009	0.487695	0.323919	-0.776363	-0.189433	0.541772	-0.323128	0.195387	-0.499598	0.380454	0.312887	0.137269	0.269004	0.87562	0.107259	0.585966	0.275986	0.398554	-1.02194	0.316659
-4.8856	-0.244158	-0.022976	0.982138	0.488462	0.324585	-0.775037	-0.189668	0.541768	-0.322599	0.195746	-0.497437	0.379858	0.31301	0.137255	0.269078	0.875107	0.106791	0.585861	0.276128	0.398014	-1.0221	0.31607
-4.88512	-0.244334	-0.023275	0.982324	0.489677	0.324801	-0.773989	-0.189556	0.541782	-0.321626	0.196159	-0.494513	0.379748	0.313016	0.137369	0.269061	0.874986	0.106463	0.586049	0.275933	0.397596	-1.02246	0.31614
-4.88464	-0.244749	-0.023306	0.982582	0.489533	0.326088	-0.77428	-0.189139	0.541772	-0.321598	0.195991	-0.493727	0.378497	0.313203	0.137511	0.269181	0.87423	0.106205	0.586457	0.27601	0.396998	-1.02237	0.316253
-4.88416	-0.244285	-0.0239408	0.982491	0.489986	0.326328	-0.774332	-0.189103	0.54175	-0.321541	0.196217	-0.491997	0.377431	0.313443	0.137364	0.26957	0.873269	0.105824	0.586597	0.276081	0.396756	-1.02235	0.315731
-4.88368	-0.24483	-0.0245018	0.982821	0.491031	0.326656	-0.774626	-0.188635	0.541843	-0.320602	0.196457	-0.489402	0.376968	0.31353	0.13699	0.269836	0.872837	0.105445	0.586859	0.276172	0.396821	-1.02181	0.315827
-4.8832	-0.24451	-0.0243788	0.983013	0.492499	0.326632	-0.774776	-0.188528	0.541943	-0.320142	0.197517	-0.488559	0.376426	0.313475	0.137101	0.27046	0.873006	0.105107	0.587155	0.276584	0.396585	-1.02095	0.315646
-4.88272	-0.244811	-0.0241374	0.983061	0.49378	0.327418	-0.774557	-0.188296	0.542033	-0.319725	0.19816	-0.487049	0.375896	0.313828	0.136942	0.270642	0.872775	0.104958	0.587269	0.276484	0.396412	-1.02087	0.315589
-4.88224	-0.245025	-0.0239454	0.983165	0.494046	0.328024	-0.77382	-0.18778	0.542021	-0.319508	0.197968	-0.485627	0.374964	0.314036	0.137085	0.270325	0.873778	0.104884	0.587306	0.276477	0.396332	-1.02037	0.315508
-4.88176	-0.244873	-0.0239581	0.983563	0.494784	0.328296	-0.773571	-0.187138	0.542002	-0.319053	0.197991	-0.483284	0.374752	0.314225	0.137453	0.270756	0.873592	0.104694	0.587629	0.276734	0.396121	-1.01973	0.315392
-4.88128	-0.244181	-0.023665	0.98345	0.495423	0.328873	-0.772809	-0.187347	0.542002	-0.3184	0.198227	-0.480603	0.374371	0.314478	0.137526	0.271174	0.874008	0.104545	0.58722	0.277453	0.39604	-1.01972	0.316053
-4.8808	-0.244453	-0.022838	0.983806	0.495948	0.329094	-0.771978	-0.187432	0.541929	-0.31791	0.198555	-0.47893	0.374012	0.314992	0.137687	0.271301	0.874029	0.104367	0.587399	0.277518	0.395529	-1.01924	0.31584
-4.88032	-0.243743	-0.0223419	0.984358	0.495875	0.33022	-0.771714	-0.186864	0.541938	-0.316554	0.198381	-0.476003	0.373664	0.31524	0.137838	0.271463	0.874199	0.104301	0.587756	0.277397	0.395097	-1.01882	0.315808
-4.87984	-0.243867	-0.0221015	0.984793	0.495886	0.330169	-0.771801	-0.186711	0.541788	-0.316805	0.198558	-0.474932	0.372992	0.315315	0.137891	0.271808	0.874167	0.103918	0.588054	0.277384	0.39466	-1.01878	0.315939
-4.87936	-0.243492	-0.0215034	0.985376	0.496609	0.330269	-0.771477	-0.186305	0.541506	-0.315611	0.199149	-0.473564	0.372384	0.315686	0.138006	0.270975	0.87429	0.103891	0.587897	0.277766	0.394754	-1.01851	0.315774
-4.87888	-0.243688	-0.0215544	0.985175	0.497575	0.330943	-0.770455	-0.18642	0.541506	-0.31516	0.198776	-0.472507	0.372003	0.315721	0.138244	0.271478	0.874626	0.103652	0.587889	0.27774	0.395024	-1.01884	0.315479
-4.8784	-0.24353	-0.0213024	0.984938	0.497912	0.331513	-0.769778	-0.185499	0.541465	-0.314438	0.19917	-0.46921	0.372354	0.315927	0.138293	0.271343	0.874951	0.102977	0.588521	0.277863	0.395121	-1.01823	0.315438
-4.87792	-0.243311	-0.0202392	0.985359	0.499068	0.331863	-0.769268	-0.18467	0.541341	-0.313495	0.200132	-0.466346	0.371331	0.316542	0.138531	0.271166	0.875162	0.10267	0.58859	0.27736	0.395145	-1.01737	0.315013
-4.87744	-0.243682	-0.020083	0.985025	0.499212	0.332598	-0.768662	-0.18462	0.541376	-0.312272	0.200616	-0.464399	0.37094	0.316397	0.138729	0.271306	0.87518	0.102271	0.588705	0.27759	0.39531	-1.01732	0.31504
-4.87696	-0.244231	-0.0196877	0.985704	0.500035	0.333495	-0.76825	-0.183659	0.541207	-0.310697	0.200784	-0.461697	0.370642	0.316287	0.139547	0.271941	0.875051	0.101799	0.58865	0.277498	0.395112	-1.01705	0.315213
-4.87648	-0.24501	-0.018979	0.986309	0.501063	0.334274	-0.767835	-0.183385	0.541103	-0.309458	0.201203	-0.460755	0.369454	0.316283	0.139852	0.272003	0.875217	0.101694	0.588774	0.277538	0.39498	-1.01728	0.314976
-4.876	-0.245254	-0.0187638	0.986779	0.502155	0.334887	-0.767404	-0.183182	0.540898	-0.30825	0.201788	-0.459888	0.369113	0.316767	0.140313	0.271799	0.875257	0.10123	0.589246	0.277872	0.394769	-1.01728	0.314554
-4.87552	-0.245187	-0.0181569	0.987902	0.502942	0.335194	-0.767589	-0.182749	0.540877	-0.307463	0.202504	-0.458358	0.368873	0.317089	0.140397	0.271435	0.876017	0.101114	0.589905	0.278036	0.394839	-1.01748	0.314188
-4.87504	-0.244602	-0.0178731	0.987895	0.503034	0.33571	-0.768128	-0.182294	0.540966	-0.307065	0.203187	-0.45637	0.36878	0.317023	0.140128	0.27114	0.876893	0.100539	0.590171	0.277868	0.394665	-1.01742	0.314109
-4.87456	-0.244465	-0.0174836	0.98789	0.503543	0.336339	-0.768234	-0.182305	0.541124	-0.306147	0.203774	-0.454352	0.36841	0.317473	0.140243	0.271182	0.877174	0.100061	0.590611	0.278206	0.394692	-1.0177	0.314087
-4.87408	-0.243882	-0.0178753	0.988962	0.503488	0.336621	-0.767886	-0.182177	0.541206	-0.305503	0.204727	-0.452383	0.368057	0.317404	0.140426	0.27128	0.878438	0.0995887	0.591	0.27819	0.394721	-1.01787	0.31426
-4.8736	-0.244608	-0.0176357	0.989614	0.504434	0.337493	-0.76781	-0.181837	0.541206	-0.303752	0.205334	-0.450323	0.367564	0.317667	0.140398	0.271316	0.878445	0.0993779	0.591398	0.278323	0.393991	-1.01828	0.314097
-4.87312	-0.244869	-0.0173749	0.990557	0.504451	0.338416	-0.767637	-0.18175	0.541138	-0.303499	0.205168	-0.448178	0.366361	0.317966	0.140562	0.271582	0.87968	0.0992772	0.591519	0.278545	0.393764	-1.0182	0.314033
-4.87264	-0.244867	-0.0178795	0.990624	0.504978	0.339519	-0.768457	-0.181202	0.541064	-0.303285	0.205613	-0.446822	0.365229	0.318714	0.140909	0.271187	0.880315	0.0988011	0.591608	0.278103	0.393553	-1.01879	0.314019
-4.87216	-0.244429	-0.0173977	0.991153	0.506176	0.339927	-0.767985	-0.181175	0.541031	-0.302722	0.206175	-0.444898	0.364674	0.319269	0.140884	0.271109	0.880919	0.0984878	0.59165	0.277916	0.393269	-1.01908	0.31408
-4.87168	-0.244253	-0.0175204	0.991572	0.506365	0.340745	-0.767542	-0.181441	0.5409	-0.301373	0.206432	-0.442919	0.364133	0.319743	0.141042	0.2715	0.880823	0.098154	0.591784	0.277984	0.393336	-1.01965	0.314124
-4.8712	-0.24401	-0.0179175	0.992045	0.506453	0.341461	-0.767444	-0.181473	0.540974	-0.301527	0.206373	-0.441318	0.363893	0.320219	0.141212	0.271824	0.882089	0.09774	0.592144	0.277527	0.393265	-1.01987	0.31415
-4.87072	-0.244	-0.017877	0.99217	0.506708	0.34231	-0.767061	-0.181246	0.540939	-0.301006	0.206593	-0.438482	0.363511	0.320256	0.141474	0.271923	0.882491	0.0971954	0.592468	0.277743	0.392757	-1.02031	0.314034
-4.87024	-0.244728	-0.0186569	0.992518	0.506994	0.342971	-0.766606	-0.180818	0.540598	-0.301547	0.206926	-0.435581	0.363214	0.320021	0.141661	0.271604	0.882913	0.0968927	0.592656	0.277691	0.392216	-1.02036	0.313542
-4.86976	-0.245248	-0.0187621	0.993138	0.507863	0.343295	-0.766834	-0.18128	0.540747	-0.300288	0.207113	-0.432585	0.362462	0.319959	0.14206	0.271344	0.883358	0.0970341	0.5929	0.277598	0.392404	-1.02093	0.313119
-4.86928	-0.245111	-0.0190723	0.993574	0.508832	0.344064	-0.767123	-0.18146	0.540738	-0.300545	0.207327	-0.430646	0.361849	0.320274	0.142064	0.271579	0.883847	0.0969344	0.593219	0.277806	0.392222	-1.0206	0.313095
-4.8688	-0.245354	-0.0194391	0.993559	0.509714	0.34432	-0.765438	-0.181699	0.540655	-0.301397	0.207633	-0.428852	0.361159	0.320189	0.142393	0.271193	0.88404	0.0966208	0.592872	0.278206	0.392233	-1.02154	0.312947
-4.86832	-0.245712	-0.0191874	0.993924	0.511304	0.345158	-0.765283	-0.18138	0.540678	-0.301156	0.207902	-0.425119	0.361172	0.320528	0.142263	0.270871	0.884346	0.0961557	0.592941	0.278477	0.392611	-1.02114	0.313046
-4.86784	-0.246204	-0.0189342	0.993491	0.512764	0.34537	-0.765448	-0.181326	0.540603	-0.300747	0.207828	-0.423519	0.360398	0.320669	0.142444	0.271185	0.884772	0.0959126	0.593147	0.278716	0.392518	-1.02099	0.312955
-4.86736	-0.245706	-0.0187757	0.993625	0.512679	0.346026	-0.765389	-0.181423	0.540313	-0.300485	0.208019	-0.421596	0.360032	0.320769	0.143156	0.271935	0.885036	0.0955022	0.59304	0.278819	0.3925	-1.02146	0.313111
-4.86688	-0.245561	-0.0187536	0.993524	0.512993	0.346572	-0.765239	-0.18149	0.540553	-0.300059	0.208976	-0.420938	0.359334	0.320733	0.143826	0.272642	0.885293	0.0952635	0.593328	0.279029	0.391971	-1.02221	0.312903
-4.8664	-0.244622	-0.018882	0.99366	0.513531	0.346656	-0.764635	-0.181301	0.540395	-0.299529	0.209173	-0.41979	0.359554	0.320751	0.144055	0.273022	0.885161	0.0948102	0.593536	0.278892	0.391642	-1.02147	0.312928
-4.86592	-0.24348	-0.019168	0.993813	0.513925	0.347137	-0.764358	-0.181275	0.540356	-0.299072	0.209571	-0.418462	0.359354	0.320775	0.144113	0.273617	0.885384	0.0944992	0.593604	0.279092	0.391984	-1.02173	0.31286
-4.86544	-0.243934	-0.018885	0.99399	0.514111	0.347844	-0.764456	-0.180928	0.540372	-0.299074	0.209832	-0.416576	0.358552	0.320578	0.143589	0.275177	0.886002	0.0943134	0.593628	0.279331	0.391905	-1.02195	0.312521
-4.86496	-0.243866	-0.0189377	0.993248	0.514699	0.348527	-0.764217	-0.181459	0.540118	-0.298971	0.210374	-0.415202	0.358159	0.320538	0.143661	0.274973	0.886073	0.0938446	0.593717	0.279597	0.39192	-1.02161	0.312397
-4.86448	-0.243639	-0.0189542	0.99302	0.516045	0.349147	-0.764451	-0.181665	0.540131	-0.298614	0.210634	-0.41367	0.357558	0.320387	0.143772	0.275598	0.88608	0.0936358	0.594051	0.279462	0.391473	-1.02169	0.312219
-4.864	-0.243127	-0.0188228	0.993006	0.516265	0.349655	-0.764688	-0.181193	0.540235	-0.29878	0.211031	-0.412946	0.357636	0.320218	0.143994	0.275988	0.886306	0.0933324	0.593898	0.279653	0.3914	-1.02113	0.31205
-4.86352	-0.242906	-0.0188629	0.993364	0.516601	0.350624	-0.764324	-0.181041	0.540211	-0.298492	0.210787	-0.411587	0.357883	0.319932	0.143292	0.275975	0.886661	0.0929078	0.594096	0.280001	0.391469	-1.02124	0.312168
-4.86304	-0.243238	-0.0190796	0.9936	0.517854	0.351641	-0.763722	-0.181514	0.540176	-0.297941	0.21105	-0.40971	0.357268	0.319781	0.142516	0.276101	0.886551	0.0927169	0.593895	0.280142	0.391475	-1.02155	0.311682
-4.86256	-0.24345	-0.0189473	0.994393	0.518915	0.352391	-0.762764	-0.180878	0.540276	-0.29764	0.21144	-0.408425	0.356155	0.3198	0.142178	0.276828	0.88746	0.0924212	0.593876	0.28034	0.391324	-1.02068	0.311204
-4.86208	-0.24319	-0.0192187	0.993753	0.518905	0.353286	-0.762273	-0.18082	0.540078	-0.297702	0.211992	-0.40812	0.355809	0.320103	0.142107	0.276615	0.887817	0.0922736	0.59372	0.280839	0.391736	-1.02072	0.311014
-4.8616	-0.244632	-0.0191783	0.99316	0.518906	0.353552	-0.762213	-0.181471	0.540073	-0.298104	0.212127	-0.407732	0.355334	0.320214	0.141534	0.27675	0.888293	0.092222	0.593656	0.281093	0.391531	-1.02084	0.310914
-4.86112	-0.244871	-0.0191265	0.993733	0.519137	0.353542	-0.762381	-0.181125	0.539916	-0.298712	0.21291	-0.407153	0.355377	0.320532	0.141326	0.276741	0.889398	0.0917829	0.593226	0.281412	0.391252	-1.02107	0.311173
-4.86064	-0.244794	-0.0190721	0.993507	0.518926	0.353928	-0.7625	-0.181451	0.54008	-0.298412	0.213198	-0.406448	0.354644	0.320732	0.141401	0.277023	0.889513	0.0914061	0.593082	0.281698	0.391035	-1.02168	0.311172
-4.86016	-0.245395	-0.0190521	0.993236	0.519302	0.354524	-0.762608	-0.18102	0.540432	-0.298705	0.213619	-0.406039	0.354496	0.320891	0.140773	0.277201	0.890429	0.0912433	0.593173	0.282057	0.390653	-1.02207	0.311224
-4.85968	-0.245821	-0.0182169	0.993693	0.519158	0.354897	-0.763664	-0.180656	0.540562	-0.299414	0.214079	-0.405751	0.353839	0.320876	0.140292	0.277288	0.891274	0.0909738	0.593162	0.28263	0.390614	-1.02218	0.310806
-4.8592	-0.245975	-0.0190449	0.993773	0.518487	0.355828	-0.763584	-0.180605	0.540667	-0.299953	0.214642	-0.404938	0.353622	0.320632	0.140333	0.277095	0.891795	0.0908136	0.593329	0.283127	0.390578	-1.02259	0.310553
-4.85872	-0.246715	-0.0190588	0.994517	0.519395	0.35612	-0.763216	-0.179961	0.540667	-0.300442	0.214952	-0.404232	0.353111	0.320528	0.140318	0.277154	0.8919	0.0906959	0.593262	0.283091	0.390816	-1.02272	0.310118
-4.85824	-0.248153	-0.0189672	0.99388	0.520513	0.356308	-0.763532	-0.179046	0.540589	-0.300665	0.215494	-0.403679	0.352597	0.320241	0.140303	0.277136	0.892214	0.0905145	0.593457	0.283181	0.390629	-1.02305	0.310013
-4.85776	-0.24897	-0.0186985	0.993752	0.52358	0.356834	-0.762735	-0.178819	0.540499	-0.301744	0.215463	-0.403598	0.351306	0.320193	0.139916	0.277099	0.892704	0.0904708	0.593789	0.283431	0.390399	-1.02318	0.309937
-4.85728	-0.249507	-0.0185774	0.994463	0.523864	0.357515	-0.762374	-0.178734	0.540546	-0.303679	0.215557	-0.402475	0.35113	0.319965	0.139827	0.276934	0.893224	0.0902084	0.593555	0.283493	0.390411	-1.02309	0.309693
-4.8568	-0.24997	-0.0190172	0.994144	0.524569	0.358283	-0.761712	-0.178894	0.540295	-0.304649	0.215555	-0.402515	0.350708	0.31982	0.1396	0.276929	0.893645	0.0900366	0.593209	0.283488	0.39074	-1.02357	0.30967
-4.85632	-0.250927	-0.0186078	0.994015	0.52528	0.359092	-0.761816	-0.178821	0.540497	-0.305403	0.216056	-0.401329	0.349882	0.319933	0.139421	0.277153	0.89364	0.0896515	0.593034	0.284177	0.390679	-1.02368	0.309632
-4.85584	-0.251559	-0.0183108	0.994773	0.525763	0.359579	-0.761842	-0.178544	0.54051	-0.306269	0.216008	-0.400391	0.349729	0.320052	0.139543	0.276605	0.894605	0.0893897	0.59328	0.284247	0.390796	-1.02375	0.309711
-4.85536	-0.252161	-0.0186959	0.994759	0.525819	0.360365	-0.761939	-0.177778	0.540361	-0.306641	0.216452	-0.399327	0.349445	0.319776	0.139528	0.277036	0.895327	0.0892767	0.593226	0.28432	0.390798	-1.02317	0.309655
-4.85488	-0.252049	-0.0182931	0.993383	0.526113	0.361053	-0.76102	-0.17772	0.540426	-0.307003	0.215988	-0.399429	0.348633	0.319839	0.139501	0.2764	0.896204	0.0889677	0.593077	0.284142	0.3907	-1.02269	0.309765
-4.8544	-0.252141	-0.0181674	0.993398	0.526144	0.361402	-0.760161	-0.177986	0.540327	-0.307455	0.216365	-0.399168	0.348261	0.320102	0.139475	0.276389	0.897032	0.0886275	0.592764	0.284208	0.390693	-1.02239	0.309701
-4.85392	-0.252761	-0.0182491	0.993631	0.527054	0.362187	-0.759537	-0.178179	0.5404	-0.307771	0.216308	-0.399049	0.347632	0.319822	0.139796	0.276675	0.898651	0.0884891	0.593106	0.284737	0.390524	-1.02225	0.309512
-4.85344	-0.252065	-0.0178827	0.993281	0.526858	0.362521	-0.75962	-0.178101	0.540375	-0.308452	0.216422	-0.398472	0.347432	0.319703	0.13994	0.276506	0.899683	0.0882861	0.592906	0.284718	0.390278	-1.02188	0.309431
-4.85296	-0.252878	-0.0179105	0.992565	0.526377	0.363726	-0.758766	-0.177674	0.540536	-0.310081	0.216651	-0.39807	0.347223	0.319502	0.139753	0.276879	0.89953	0.088029	0.592308	0.284737	0.390339	-1.02177	0.309184
-4.85248	-0.253471	-0.0179152	0.991892	0.526956	0.364193	-0.758585	-0.177183	0.54064	-0.310867	0.216418	-0.398797	0.346613	0.319435	0.139739	0.277093	0.900039	0.0879019	0.592149	0.284476	0.389932	-1.02153	0.308844
-4.852	-0.254395	-0.0181285	0.991741	0.528693	0.364887	-0.757579	-0.177144	0.540771	-0.312117	0.21682	-0.398458	0.345267	0.319684	0.139733	0.277328	0.900324	0.0878688	0.592193	0.284162	0.389465	-1.02123	0.308619
-4.85152	-0.254741	-0.017738	0.991233	0.528274	0.36568	-0.756264	-0.176947	0.540887	-0.312711	0.217181	-0.399046	0.344385	0.319858	0.139218	0.277368	0.900752	0.0876311	0.591654	0.284429	0.389335	-1.02125	0.308339
-4.85104	-0.254998	-0.0171237	0.990455	0.529709	0.366628	-0.755887	-0.176554	0.541029	-0.31355	0.217484	-0.398908	0.343973	0.319841	0.139431	0.277579	0.90113	0.087466	0.591176	0.284776	0.389026	-1.02121	0.308327
-4.85056	-0.256018	-0.0171091	0.990582	0.529893	0.366996	-0.756134	-0.176865	0.541086	-0.313562	0.217472	-0.399307	0.344055	0.319789	0.139133	0.277673	0.901857	0.0874135	0.591294	0.285012	0.388949	-1.02047	0.308077
-4.85008	-0.256123	-0.0172424	0.990839	0.530974	0.367776	-0.756281	-0.176823	0.540978	-0.31447	0.217193	-0.399777	0.344201	0.319867	0.13898	0.277745	0.902543	0.0873081	0.591711	0.284994	0.388973	-1.02076	0.307932
-4.8496	-0.256615	-0.0174563	0.990197	0.531572	0.36884	-0.755439	-0.176713	0.540942	-0.315142	0.217459	-0.400121	0.344083	0.319783	0.139324	0.277518	0.902148	0.0870073	0.59148	0.285147	0.388308	-1.0199	0.30765
-4.84912	-0.257298	-0.017565	0.990265	0.532582	0.369629	-0.753927	-0.176436	0.540808	-0.315327	0.217575	-0.40024	0.34373	0.320017	0.13921	0.27693	0.90218	0.0865722	0.591963	0.285253	0.388193	-1.01983	0.307545
-4.84864	-0.257728	-0.0179008	0.990487	0.532713	0.370648	-0.754268	-0.177027	0.540731	-0.316049	0.217879	-0.401473	0.343261	0.320141	0.138984	0.27735	0.901396	0.0865309	0.592075	0.285419	0.388133	-1.02079	0.307371
-4.84816	-0.257647	-0.0177114	0.990595	0.532919	0.371278	-0.753414	-0.177401	0.540739	-0.316619	0.217771	-0.401151	0.343034	0.320216	0.138757	0.277611	0.901674	0.086606	0.591974	0.285768	0.387697	-1.02048	0.307341
-4.84768	-0.257517	-0.0174861	0.990317	0.533866	0.371977	-0.752789	-0.177075	0.54054	-0.31711	0.217927	-0.401914	0.342444	0.320345	0.138642	0.277696	0.901805	0.0866007	0.591747	0.286047	0.387673	-1.02087	0.307405
-4.8472	-0.257871	-0.0173409	0.990516	0.534242	0.372698	-0.753515	-0.176965	0.540388	-0.317591	0.21818	-0.402894	0.342464	0.320276	0.138598	0.278412	0.901765	0.0865459	0.591481	0.285993	0.387103	-1.02111	0.307081
-4.84672	-0.257856	-0.0172753	0.990302	0.534706	0.373395	-0.752935	-0.177944	0.540275	-0.318256	0.218315	-0.403899	0.341539	0.320162	0.138548	0.278698	0.901692	0.086367	0.591377	0.28599	0.386784	-1.02112	0.306831
-4.84624	-0.258121	-0.0175928	0.990194	0.53503	0.374026	-0.752285	-0.177817	0.54039	-0.318778	0.218485	-0.403782	0.341091	0.320403	0.138366	0.279229	0.901322	0.0863971	0.591249	0.285877	0.386951	-1.02154	0.306714
-4.84576	-0.259737	-0.0178206	0.990118	0.535111	0.375411	-0.751666	-0.177786	0.540302	-0.319038	0.218536	-0.404795	0.340503	0.320897	0.138491	0.279545	0.901413	0.0860876	0.591398	0.286067	0.387055	-1.02122	0.306364
-4.84528	-0.259888	-0.01771	0.990629	0.535222	0.37613	-0.75151	-0.178487	0.540288	-0.319329	0.218871	-0.405431	0.340477	0.321255	0.13836	0.279932	0.901569	0.0856556	0.591415	0.285988	0.387249	-1.02132	0.306117
-4.8448	-0.261659	-0.0175743	0.991098	0.535562	0.376928	-0.750072	-0.178717	0.540387	-0.320053	0.21965	-0.405808	0.340816	0.321364	0.138247	0.279797	0.901228	0.0856174	0.591198	0.286147	0.386753	-1.02045	0.306006
-4.84432	-0.262628	-0.0175002	0.990459	0.537588	0.377196	-0.75	-0.179227	0.540141	-0.320338	0.21997	-0.405198	0.340216	0.32124	0.138398	0.279683	0.900814	0.0851802	0.591318	0.286434	0.386558	-1.02034	0.305802
-4.84384	-0.262997	-0.0173081	0.990904	0.537308	0.378009	-0.749283	-0.179961	0.540113	-0.320006	0.220345	-0.405095	0.339431	0.321463	0.139068	0.279811	0.900678	0.0848257	0.591495	0.286814	0.385754	-1.02081	0.305503
-4.84336	-0.264119	-0.0173542	0.99149	0.537998	0.378914	-0.749066	-0.179838	0.540072	-0.320423	0.220894	-0.405181	0.339129	0.321666	0.139594	0.279985	0.900187	0.0846887	0.59154	0.287248	0.385241	-1.02	0.305127
-4.84288	-0.26451	-0.017325	0.991279	0.53915	0.379653	-0.747989	-0.179794	0.540157	-0.320052	0.221459	-0.405328	0.339248	0.321983	0.139958	0.279853	0.899955	0.0845143	0.591511	0.287128	0.384743	-1.02011	0.304913
-4.8424	-0.264988	-0.0173925	0.991294	0.540099	0.380933	-0.747182	-0.180356	0.540059	-0.320562	0.222174	-0.404176	0.338817	0.322145	0.139729	0.279626	0.899434	0.0842617	0.591105	0.287011	0.384817	-1.01954	0.30439
-4.84192	-0.266187	-0.0169788	0.990688	0.54001	0.381229	-0.747174	-0.18102	0.539997	-0.321104	0.222362	-0.404421	0.339215	0.322198	0.139784	0.27967	0.899792	0.0841608	0.591278	0.286884	0.384667	-1.01956	0.304402
-4.84144	-0.267567	-0.0165075	0.990191	0.54135	0.381995	-0.747003	-0.180927	0.539904	-0.321396	0.222932	-0.404838	0.338626	0.322224	0.139821	0.280009	0.899995	0.0838163	0.59165	0.287044	0.385022	-1.01956	0.304339
-4.84096	-0.268156	-0.0166012	0.990071	0.541985	0.382719	-0.746758	-0.181917	0.539883	-0.321872	0.223144	-0.405246	0.338653	0.322426	0.140235	0.280622	0.899796	0.0836578	0.591717	0.28716	0.384572	-1.01935	0.304155
-4.84048	-0.268609	-0.0166176	0.990396	0.542661	0.383564	-0.746323	-0.182479	0.539803	-0.322786	0.223242	-0.4054	0.338794	0.32233	0.140475	0.281213	0.899785	0.0837289	0.591789	0.287315	0.38433	-1.01946	0.303914
-4.84	-0.268628	-0.0163998	0.990053	0.542464	0.383889	-0.746964	-0.182587	0.539708	-0.32352	0.224034	-0.405698	0.338384	0.32225	0.141033	0.281533	0.899204	0.0836104	0.591652	0.28747	0.384478	-1.01896	0.304233
-4.83952	-0.269446	-0.016202	0.990617	0.543404	0.384494	-0.747312	-0.183454	0.5397	-0.32406	0.224412	-0.405979	0.338297	0.322255	0.1412	0.281943	0.89831	0.0833121	0.591889	0.287519	0.384448	-1.01823	0.304526
-4.83904	-0.270135	-0.015631	0.990989	0.543619	0.385218	-0.746943	-0.183608	0.539559	-0.325011	0.225633	-0.40615	0.338139	0.322164	0.141524	0.282455	0.897752	0.0834153	0.59211	0.287487	0.384545	-1.01839	0.304269
-4.83856	-0.269946	-0.0159528	0.99101	0.544453	0.385301	-0.74641	-0.183452	0.539425	-0.325065	0.225921	-0.406636	0.337881	0.32216	0.141776	0.282621	0.897368	0.0833558	0.592127	0.287465	0.384911	-1.01836	0.304169
-4.83808	-0.270634	-0.0157467	0.990809	0.544966	0.386345	-0.745922	-0.1832	0.539508	-0.325871	0.226322	-0.406759	0.337763	0.322078	0.142186	0.28333	0.896802	0.0834938	0.592048	0.28782	0.385419	-1.0186	0.30387
-4.8376	-0.270513	-0.0156902	0.990819	0.544424	0.386849	-0.745779	-0.182812	0.539816	-0.326049	0.226958	-0.407974	0.337899	0.322615	0.142161	0.283613	0.896153	0.0832888	0.592083	0.288051	0.385821	-1.01868	0.304201
-4.83712	-0.270308	-0.0155757	0.990797	0.544807	0.387485	-0.746261	-0.18298	0.53987	-0.326751	0.228044	-0.408912	0.337852	0.322987	0.142064	0.283939	0.895979	0.0832742	0.592165	0.288233	0.385971	-1.01871	0.303747
-4.83664	-0.270594	-0.0159667	0.989738	0.544909	0.388336	-0.745734	-0.183074	0.539743	-0.327187	0.228844	-0.409654	0.337336	0.323368	0.142525	0.284198	0.895217	0.0830574	0.592211	0.288346	0.385945	-1.01841	0.303694
-4.83616	-0.270692	-0.0165813	0.98967	0.545984	0.389264	-0.745142	-0.182893	0.539561	-0.328339	0.229357	-0.410103	0.337485	0.323223	0.142765	0.284217	0.894221	0.0829629	0.591985	0.288596	0.386182	-1.01838	0.30407
-4.83568	-0.271615	-0.0169858	0.989763	0.546905	0.389371	-0.74486	-0.183493	0.539621	-0.33003	0.229687	-0.410409	0.336501	0.323634	0.143245	0.284213	0.894392	0.0828394	0.592031	0.288464	0.386155	-1.01823	0.303728
-4.8352	-0.272723	-0.0166656	0.990214	0.546722	0.390435	-0.745092	-0.183193	0.539831	-0.331039	0.230122	-0.411097	0.335853	0.323909	0.143203	0.284713	0.894446	0.0825554	0.592198	0.288166	0.386869	-1.01837	0.303724
-4.83472	-0.27251	-0.0165495	0.99029	0.546707	0.391033	-0.743415	-0.182994	0.539888	-0.331307	0.230654	-0.412573	0.335517	0.324825	0.143236	0.285037	0.893661	0.0825979	0.592142	0.288314	0.386935	-1.01868	0.303899
-4.83424	-0.27235	-0.0166767	0.990094	0.546935	0.391937	-0.74357	-0.183737	0.539805	-0.332016	0.230753	-0.412687	0.335162	0.325172	0.143405	0.285492	0.89332	0.0819943	0.592026	0.288327	0.387751	-1.01827	0.303701
-4.83376	-0.272844	-0.0165465	0.989884	0.547759	0.392839	-0.744142	-0.183114	0.539779	-0.33263	0.231007	-0.413695	0.334211	0.3255	0.143895	0.28569	0.89281	0.0819387	0.592144	0.288194	0.387832	-1.01836	0.303531
-4.83328	-0.27414	-0.0160651	0.990086	0.54945	0.393316	-0.743582	-0.182986	0.539932	-0.33304	0.231016	-0.414361	0.333175	0.325186	0.143935	0.285821	0.891698	0.0820276	0.591945	0.287932	0.38811	-1.01929	0.303571
-4.8328	-0.275118	-0.0162474	0.989814	0.549603	0.3938	-0.74396	-0.182852	0.54012	-0.33412	0.231922	-0.414905	0.332689	0.32549	0.144041	0.286431	0.890936	0.0819187	0.59187	0.288083	0.388504	-1.01895	0.303419
-4.83232	-0.275374	-0.016287	0.990235	0.549377	0.394268	-0.744023	-0.183234	0.54043	-0.334668	0.232268	-0.416175	0.332094	0.325504	0.143925	0.286244	0.889863	0.0819131	0.591794	0.287838	0.388653	-1.01921	0.303888
-4.83184	-0.275884	-0.0164021	0.990644	0.550295	0.394973	-0.743147	-0.183632	0.540445	-0.335043	0.232503	-0.416692	0.331949	0.325601	0.143924	0.286317	0.889246	0.0819125	0.592252	0.287809	0.388523	-1.01878	0.303853
-4.83136	-0.275798	-0.0164792	0.9901	0.550839	0.396149	-0.743356	-0.183653	0.540431	-0.335668	0.233271	-0.41655	0.332014	0.325778	0.144177	0.286285	0.888465	0.082101	0.592154	0.287678	0.388872	-1.01852	0.303833
-4.83088	-0.276026	-0.0163738	0.990362	0.55083	0.396843	-0.742689	-0.184255	0.540543	-0.336368	0.23369	-0.41639	0.331868	0.326007	0.144132	0.286555	0.887783	0.0822104	0.592032	0.288122	0.389024	-1.01874	0.303374
-4.8304	-0.276849	-0.0154906	0.989566	0.549947	0.397765	-0.743177	-0.184693	0.54083	-0.336762	0.235256	-0.417276	0.331278	0.326265	0.144485	0.286657	0.886877	0.0820729	0.592127	0.287857	0.389084	-1.01914	0.303493
-4.82992	-0.277001	-0.0152653	0.989503	0.550057	0.399027	-0.742902	-0.184696	0.541105	-0.337378	0.235829	-0.418723	0.33113	0.326476	0.144543	0.286876	0.885373	0.0820343	0.592255	0.288164	0.389381	-1.01894	0.303343
-4.82944	-0.27735	-0.0150961	0.989538	0.549812	0.400215	-0.743621	-0.184311	0.541138	-0.337615	0.235947	-0.420215	0.330612	0.32595	0.144671	0.287091	0.884967	0.0819677	0.592158	0.288324	0.389179	-1.01887	0.303138
-4.82896	-0.277174	-0.0152449	0.989905	0.549768	0.401124	-0.743232	-0.18406	0.54133	-0.338054	0.235962	-0.42108	0.330078	0.325746	0.144961	0.286994	0.884125	0.0818691	0.591901	0.288652	0.38921	-1.01859	0.302725
-4.82848	-0.277441	-0.014739	0.989634	0.54979	0.40172	-0.743734	-0.18355	0.541362	-0.338307	0.236028	-0.421003	0.329007	0.326206	0.14515	0.287162	0.883188	0.0818533	0.592051	0.288626	0.389076	-1.01866	0.302721
-4.828	-0.278154	-0.0149761	0.98964	0.551285	0.402683	-0.742521	-0.183471	0.541526	-0.338304	0.236473	-0.422061	0.328869	0.326374	0.145284	0.287439	0.883111	0.0818714	0.59253	0.288715	0.389277	-1.01883	0.303029
-4.82752	-0.27859	-0.0147479	0.989114	0.550762	0.402973	-0.742401	-0.1832	0.54173	-0.338395	0.23729	-0.422074	0.328346	0.326828	0.145379	0.288092	0.882591	0.0816208	0.592691	0.288881	0.388888	-1.01901	0.302717
-4.82704	-0.278675	-0.0148185	0.989609	0.550925	0.403462	-0.741887	-0.18345	0.541945	-0.338547	0.237091	-0.422099	0.327834	0.32693	0.145159	0.288358	0.881955	0.0816264	0.593201	0.289123	0.389301	-1.01898	0.302646
-4.82656	-0.278811	-0.0143281	0.988744	0.551332	0.403842	-0.74046	-0.184062	0.542219	-0.338979	0.236505	-0.422767	0.32734	0.326946	0.145027	0.288984	0.881381	0.081537	0.593194	0.289241	0.389189	-1.01817	0.30242
-4.82608	-0.279593	-0.0139766	0.988448	0.551759	0.404713	-0.740097	-0.183958	0.542501	-0.339124	0.236582	-0.422867	0.326811	0.327195	0.144953	0.289377	0.880652	0.0815555	0.593613	0.289218	0.389383	-1.01806	0.30244
-4.8256	-0.28005	-0.0137105	0.988217	0.551893	0.405111	-0.740849	-0.183684	0.542619	-0.339257	0.237197	-0.422556	0.326706	0.32731	0.144929	0.289823	0.879969	0.0813083	0.593722	0.289625	0.389531	-1.01843	0.301969
-4.82512	-0.280643	-0.0131739	0.988028	0.553136	0.404444	-0.741702	-0.182875	0.542869	-0.339684	0.237405	-0.422511	0.326841	0.327616	0.144851	0.290149	0.87896	0.081109	0.593877	0.289674	0.389534	-1.01844	0.301933
-4.82464	-0.28148	-0.0130516	0.987977	0.551948	0.404546	-0.741614	-0.182584	0.543008	-0.340137	0.237966	-0.42229	0.327061	0.327767	0.145225	0.290336	0.878203	0.0810725	0.594233	0.289707	0.389455	-1.01829	0.301717
-4.82416	-0.281776	-0.0128878	0.988304	0.552718	0.404916	-0.741252	-0.181952	0.542979	-0.340441	0.238015	-0.421976	0.32639	0.327811	0.145515	0.290594	0.877891	0.0810288	0.594201	0.289856	0.389223	-1.01791	0.301576
-4.82368	-0.281944	-0.0128878	0.988056	0.551941	0.405543	-0.741809	-0.181424	0.543087	-0.340631	0.238153	-0.422434	0.325789	0.32798	0.145484	0.290527	0.877142	0.0809498	0.594701	0.28953	0.389701	-1.01706	0.301352
-4.8232	-0.282227	-0.0126226	0.987948	0.551998	0.406115	-0.741101	-0.180778	0.543162	-0.340287	0.238333	-0.422678	0.325308	0.328256	0.145306	0.290894	0.876481	0.0806762	0.595184	0.289538	0.38971	-1.0165	0.301366
-4.82272	-0.282494	-0.0123836	0.987629	0.552225	0.406692	-0.740451	-0.180009	0.543194	-0.34013	0.238657	-0.422712	0.325108	0.328299	0.145593	0.291287	0.875419	0.0806393	0.595267	0.289236	0.38946	-1.01611	0.301327
-4.82224	-0.282152	-0.0127575	0.987529	0.551934	0.407487	-0.740614	-0.179749	0.54325	-0.340438	0.238531	-0.422817	0.324223	0.328658	0.145838	0.290768	0.874155	0.080393	0.595118	0.2891	0.389511	-1.01551	0.301324
-4.82176	-0.282251	-0.0124925	0.988404	0.552149	0.408336	-0.740047	-0.179506	0.543298	-0.340269	0.239161	-0.423112	0.323525	0.329369	0.145884	0.290718	0.873932	0.0800768	0.59548	0.288835	0.389771	-1.01505	0.301616
-4.82128	-0.282154	-0.0128329	0.988355	0.552558	0.408591	-0.740049	-0.178955	0.543421	-0.340669	0.23975	-0.423445	0.322549	0.329653	0.145891	0.290318	0.873371	0.0800858	0.595441	0.288681	0.389724	-1.015	0.301535
-4.8208	-0.282365	-0.0126714	0.988848	0.551784	0.409418	-0.739477	-0.178076	0.543662	-0.339553	0.240667	-0.423613	0.322115	0.329897	0.146142	0.289882	0.873292	0.0799289	0.595605	0.288953	0.390058	-1.01466	0.301359
-4.82032	-0.282784	-0.013041	0.989192	0.551307	0.410051	-0.739874	-0.177881	0.544034	-0.338726	0.241283	-0.423734	0.321176	0.330319	0.146149	0.289657	0.873084	0.0796482	0.595842	0.288784	0.390377	-1.01377	0.300627
-4.81984	-0.283227	-0.0130181	0.989191	0.551407	0.411132	-0.740428	-0.177743	0.544262	-0.338546	0.241998	-0.424015	0.320594	0.3305	0.146332	0.289852	0.872918	0.0794834	0.596426	0.28874	0.390853	-1.01322	0.300482
-4.81936	-0.28293	-0.0130409	0.989702	0.551963	0.41194	-0.740389	-0.177585	0.54443	-0.338656	0.24285	-0.423451	0.320099	0.330501	0.146204	0.289458	0.87201	0.0794208	0.596715	0.28869	0.391317	-1.0133	0.300389
-4.81888	-0.283311	-0.0130133	0.989841	0.553587	0.412241	-0.741459	-0.177525	0.544602	-0.338577	0.243532	-0.423448	0.319206	0.330481	0.146449	0.289179	0.871464	0.0791286	0.597177	0.288785	0.391614	-1.01397	0.300895
-4.8184	-0.282862	-0.0132475	0.990045	0.553215	0.412918	-0.741047	-0.177169	0.544838	-0.337609	0.24383	-0.422947	0.318755	0.330924	0.14621	0.288932	0.871183	0.0790443	0.597599	0.288443	0.391351	-1.01346	0.301224
-4.81792	-0.283324	-0.0130005	0.989575	0.553918	0.41407	-0.740217	-0.176702	0.545157	-0.337714	0.244698	-0.422149	0.317829	0.331267	0.14635	0.288421	0.871387	0.0791318	0.598297	0.288362	0.391451	-1.01282	0.301117
-4.81744	-0.283692	-0.0131283	0.989595	0.554032	0.415464	-0.740528	-0.176451	0.545492	-0.338707	0.245307	-0.422112	0.317141	0.331768	0.146597	0.288473	0.869802	0.0791958	0.598918	0.28805	0.391711	-1.01279	0.300684
-4.81696	-0.283702	-0.0127189	0.989652	0.554642	0.416964	-0.74042	-0.175476	0.545602	-0.338647	0.246203	-0.42144	0.316046	0.332161	0.146318	0.288818	0.869196	0.0791495	0.59945	0.287969	0.391639	-1.01274	0.300224
-4.81648	-0.283327	-0.0127505	0.989271	0.554886	0.417794	-0.740752	-0.175294	0.545642	-0.339153	0.247146	-0.422654	0.31453	0.332505	0.145977	0.289119	0.869015	0.0791377	0.600008	0.287927	0.391618	-1.01221	0.300487
-4.816	-0.28359	-0.0128255	0.989354	0.554893	0.418725	-0.741297	-0.175312	0.545587	-0.339435	0.247662	-0.423141	0.313642	0.332803	0.145894	0.289032	0.869229	0.0789988	0.600476	0.287799	0.392184	-1.01159	0.300582
-4.81552	-0.284086	-0.0127278	0.988756	0.555007	0.419728	-0.740419	-0.175141	0.545766	-0.339293	0.248779	-0.422738	0.31302	0.333281	0.145524	0.288795	0.869879	0.0789892	0.6009	0.287545	0.392493	-1.01094	0.300547
-4.81504	-0.283674	-0.0131316	0.988535	0.555015	0.420385	-0.739113	-0.17458	0.545635	-0.339495	0.249609	-0.422272	0.312381	0.333968	0.145838	0.288769	0.869631	0.0787442	0.601764	0.287518	0.392693	-1.00977	0.300627
-4.81456	-0.284971	-0.0126783	0.988422	0.555538	0.421416	-0.73913	-0.174301	0.545883	-0.339944	0.251148	-0.422501	0.311818	0.33431	0.145672	0.28826	0.870102	0.0786252	0.602234	0.287409	0.393019	-1.00979	0.300547
-4.81408	-0.285933	-0.012635	0.988595	0.556136	0.422194	-0.740212	-0.174313	0.546074	-0.339748	0.252232	-0.4224	0.310343	0.334559	0.145324	0.288038	0.870185	0.0784891	0.602701	0.287328	0.393285	-1.00876	0.300251
-4.8136	-0.284808	-0.0124875	0.988677	0.557847	0.422877	-0.740704	-0.174277	0.546298	-0.340329	0.252689	-0.422206	0.309531	0.334729	0.144803	0.287886	0.870421	0.0782604	0.60311	0.287668	0.393697	-1.00825	0.300311
-4.81312	-0.284979	-0.0123498	0.988729	0.558206	0.424107	-0.740243	-0.173814	0.546296	-0.340759	0.253399	-0.421772	0.308921	0.33515	0.14433	0.287852	0.871187	0.0779674	0.603672	0.287628	0.393834	-1.00819	0.300558
-4.81264	-0.286537	-0.0127249	0.989314	0.560087	0.425198	-0.739988	-0.173629	0.546601	-0.340844	0.254246	-0.421337	0.308616	0.335648	0.144254	0.287453	0.871331	0.0778467	0.604315	0.287906	0.393427	-1.00802	0.300363
-4.81216	-0.287406	-0.0129919	0.989293	0.560684	0.426469	-0.739023	-0.173393	0.546539	-0.341283	0.255113	-0.421335	0.307347	0.336028	0.144317	0.28639	0.872001	0.0778444	0.604569	0.288099	0.393586	-1.00756	0.300417
-4.81168	-0.288138	-0.0130587	0.989868	0.561403	0.427447	-0.740118	-0.173776	0.546696	-0.341154	0.255859	-0.42059	0.307048	0.336461	0.144222	0.285446	0.872538	0.0779756	0.605088	0.288106	0.393399	-1.00746	0.300307
-4.8112	-0.289164	-0.0127842	0.98985	0.561735	0.428689	-0.740363	-0.172968	0.546805	-0.341556	0.256754	-0.42074	0.306294	0.336759	0.144845	0.284473	0.87233	0.0779795	0.605861	0.288262	0.393253	-1.00718	0.300514
-4.81072	-0.290051	-0.0136031	0.989825	0.562332	0.429634	-0.739504	-0.172896	0.54685	-0.341961	0.257081	-0.420515	0.305072	0.336968	0.144715	0.284197	0.872343	0.0776893	0.606607	0.288278	0.392992	-1.00685	0.300806
-4.81024	-0.290299	-0.0137065	0.989904	0.562992	0.430441	-0.738727	-0.173079	0.546934	-0.342212	0.25709	-0.420331	0.304798	0.337885	0.145113	0.284093	0.872335	0.0776993	0.606966	0.288017	0.393196	-1.0063	0.301452
-4.80976	-0.291368	-0.0136253	0.989516	0.563759	0.431465	-0.738993	-0.173415	0.546878	-0.341983	0.257557	-0.419864	0.304497	0.338525	0.14519	0.28394	0.872303	0.0776288	0.60776	0.288058	0.393348	-1.00569	0.301245
-4.80928	-0.291169	-0.0137259	0.988836	0.562766	0.432136	-0.739639	-0.172835	0.546611	-0.342568	0.25761	-0.418508	0.303256	0.339079	0.145071	0.283837	0.872173	0.0774291	0.608257	0.287784	0.392906	-1.00469	0.301224
-4.8088	-0.291177	-0.0128546	0.989263	0.562776	0.433278	-0.739234	-0.173928	0.546855	-0.342376	0.258291	-0.417579	0.302607	0.339343	0.145071	0.283641	0.872291	0.0775114	0.608993	0.287443	0.392568	-1.00426	0.301764
-4.80832	-0.291549	-0.0124682	0.989425	0.561562	0.434977	-0.739763	-0.173663	0.547137	-0.342267	0.259011	-0.416568	0.302035	0.339829	0.145304	0.283277	0.872913	0.0771759	0.609854	0.287484	0.392283	-1.00363	0.301689
-4.80784	-0.291494	-0.0123791	0.989703	0.56166	0.436039	-0.739823	-0.173748	0.547226	-0.342143	0.259637	-0.415566	0.300974	0.339617	0.145348	0.283462	0.87293	0.0770812	0.610488	0.287447	0.392273	-1.003	0.301758
-4.80736	-0.29224	-0.0121605	0.989833	0.56021	0.436787	-0.740094	-0.173415	0.547431	-0.342218	0.260428	-0.414156	0.300751	0.339746	0.14536	0.283039	0.872838	0.0768731	0.610845	0.287138	0.392277	-1.00283	0.301814
-4.80688	-0.293223	-0.0117131	0.989408	0.559879	0.437717	-0.739936	-0.17295	0.547654	-0.342228	0.260855	-0.413096	0.300399	0.340234	0.145797	0.282944	0.872764	0.0770116	0.611428	0.286738	0.392056	-1.00224	0.301947
-4.8064	-0.294321	-0.0115382	0.989157	0.559861	0.43917	-0.740913	-0.172975	0.547592	-0.343256	0.261261	-0.411583	0.299644	0.340551	0.145552	0.282471	0.872205	0.0769639	0.612246	0.28633	0.391593	-1.00199	0.302053
-4.80592	-0.294104	-0.0111158	0.989052	0.559455	0.440056	-0.740881	-0.172714	0.54771	-0.34327	0.262308	-0.410037	0.299158	0.341149	0.145197	0.282691	0.871652	0.076967	0.612556	0.28589	0.391879	-1.00126	0.302372
-4.80544	-0.29494	-0.0110655	0.989289	0.559376	0.441908	-0.742783	-0.172004	0.547908	-0.343131	0.262095	-0.408483	0.298398	0.341657	0.145296	0.282648	0.871795	0.0769257	0.613218	0.285405	0.392004	-1.00142	0.302384
-4.80496	-0.294858	-0.010967	0.989117	0.558608	0.443157	-0.741969	-0.171411	0.548014	-0.342698	0.262728	-0.408196	0.297281	0.34182	0.145254	0.28298	0.871729	0.0765797	0.613704	0.28516	0.39206	-1.00077	0.302554
-4.80448	-0.29466	-0.0110468	0.988771	0.558664	0.444167	-0.744079	-0.171331	0.548256	-0.342371	0.263214	-0.407206	0.296459	0.341816	0.145146	0.281883	0.871812	0.076533	0.613591	0.284902	0.39222	-1.00061	0.302647
-4.804	-0.2941	-0.0108671	0.988673	0.558438	0.445734	-0.745066	-0.169651	0.548411	-0.342444	0.263569	-0.406546	0.295777	0.34223	0.145316	0.281565	0.87196	0.0764248	0.614117	0.284845	0.392195	-1.00066	0.302655
-4.80352	-0.293914	-0.010837	0.988414	0.557839	0.44714	-0.746134	-0.169229	0.548471	-0.342219	0.263739	-0.406497	0.295329	0.342201	0.145157	0.281746	0.870914	0.0765054	0.614454	0.284522	0.392545	-1.00038	0.302713
-4.80304	-0.293145	-0.0105607	0.988281	0.55829	0.448762	-0.746335	-0.168827	0.548554	-0.342411	0.264058	-0.406616	0.294837	0.342378	0.145263	0.281628	0.871466	0.0765029	0.614698	0.284156	0.392716	-0.999785	0.302807
-4.80256	-0.292931	-0.0105418	0.988197	0.55748	0.449461	-0.746334	-0.168429	0.54863	-0.342117	0.264418	-0.405369	0.293994	0.342857	0.14525	0.281194	0.871578	0.0764537	0.614676	0.283728	0.392904	-1.00015	0.302974
-4.80208	-0.292808	-0.0111072	0.988277	0.557471	0.450563	-0.747801	-0.167769	0.548806	-0.342209	0.265129	-0.405622	0.293479	0.342869	0.145017	0.281396	0.87232	0.0763254	0.615224	0.283593	0.39293	-0.99992	0.302912
-4.8016	-0.292395	-0.011368	0.98784	0.556746	0.451904	-0.748374	-0.167529	0.548891	-0.342741	0.265179	-0.405919	0.293085	0.343591	0.145423	0.281334	0.872546	0.0760882	0.615518	0.283653	0.393263	-0.998932	0.3032
-4.80112	-0.292275	-0.010728	0.987939	0.555659	0.452429	-0.747877	-0.167245	0.54882	-0.342973	0.265364	-0.405937	0.292713	0.343657	0.145609	0.281191	0.872375	0.0755782	0.615578	0.283244	0.393302	-0.99825	0.303581
-4.80064	-0.292255	-0.0106444	0.988129	0.555011	0.453181	-0.748384	-0.167343	0.549031	-0.342776	0.265467	-0.405827	0.292306	0.344245	0.145755	0.281174	0.872034	0.0752175	0.615913	0.283001	0.39361	-0.997934	0.303891
-4.80016	-0.293075	-0.0107994	0.988726	0.553922	0.45411	-0.749088	-0.166517	0.54929	-0.343181	0.265592	-0.405576	0.291667	0.344814	0.146356	0.281655	0.872383	0.0748424	0.615868	0.283473	0.393841	-0.997239	0.304308
-4.79968	-0.293947	-0.0108816	0.988461	0.553162	0.455001	-0.749597	-0.166026	0.549279	-0.343279	0.265732	-0.40522	0.2915	0.344826	0.146275	0.281633	0.872685	0.0748007	0.616189	0.283104	0.394202	-0.996909	0.304545
-4.7992	-0.294485	-0.0111927	0.988627	0.553038	0.455796	-0.749519	-0.165485	0.549352	-0.343175	0.266254	-0.404961	0.291247	0.345041	0.146189	0.281248	0.873323	0.0746747	0.616411	0.282938	0.394851	-0.996421	0.305044
-4.79872	-0.295133	-0.0109162	0.988496	0.552771	0.456537	-0.750081	-0.164787	0.549389	-0.342693	0.265982	-0.404949	0.291178	0.345312	0.146187	0.281071	0.873031	0.0743855	0.616557	0.282947	0.395065	-0.996171	0.305537
-4.79824	-0.294708	-0.0104699	0.988162	0.551589	0.458232	-0.750318	-0.164554	0.549257	-0.343148	0.26675	-0.404781	0.290922	0.345532	0.147109	0.280909	0.873035	0.0741829	0.616588	0.283051	0.396139	-0.99549	0.305753
-4.79776	-0.29451	-0.0103107	0.987188	0.551272	0.45936	-0.750603	-0.163875	0.549366	-0.343051	0.266794	-0.403389	0.29015	0.345289	0.147746	0.280417	0.872928	0.0738012	0.616773	0.282906	0.396519	-0.99519	0.305852
-4.79728	-0.295039	-0.0100614	0.987491	0.551139	0.46032	-0.750047	-0.163374	0.549587	-0.342396	0.267174	-0.402317	0.289763	0.345471	0.148264	0.279553	0.872806	0.0734823	0.617417	0.283075	0.396482	-0.994424	0.30601
-4.7968	-0.295431	-0.00969764	0.987386	0.550805	0.461484	-0.75011	-0.162683	0.549772	-0.34324	0.26734	-0.401357	0.289028	0.345837	0.148312	0.278936	0.872786	0.0732353	0.617859	0.28297	0.397031	-0.994313	0.306186
-4.79632	-0.295863	-0.00984998	0.986857	0.550203	0.462583	-0.749874	-0.161987	0.549901	-0.343284	0.267647	-0.400629	0.28874	0.346161	0.148535	0.278643	0.873161	0.0728987	0.618302	0.283084	0.397445	-0.993715	0.306411
-4.79584	-0.295336	-0.00966773	0.986763	0.55014	0.46327	-0.749457	-0.161208	0.550059	-0.344083	0.267821	-0.399515	0.287977	0.346627	0.148528	0.278191	0.873492	0.0726148	0.618601	0.283063	0.397748	-0.994417	0.307098
-4.79536	-0.29529	-0.00900618	0.986578	0.548264	0.464091	-0.748211	-0.160059	0.549982	-0.344124	0.267568	-0.398032	0.287586	0.346865	0.148585	0.27817	0.874059	0.0725855	0.618564	0.283364	0.398063	-0.994688	0.307291
-4.79488	-0.295752	-0.00910575	0.985899	0.547438	0.465258	-0.75006	-0.159433	0.549796	-0.343343	0.267608	-0.39729	0.287511	0.347275	0.148678	0.278006	0.873818	0.0725838	0.619025	0.283282	0.398423	-0.9948	0.307107
-4.7944	-0.29543	-0.00929171	0.985596	0.547189	0.465761	-0.749674	-0.157985	0.549837	-0.342733	0.26761	-0.396217	0.286934	0.347326	0.148778	0.27777	0.873512	0.0726343	0.619781	0.283259	0.398812	-0.994718	0.307129
-4.79392	-0.29603	-0.0090368	0.986267	0.546829	0.467137	-0.749466	-0.15696	0.549816	-0.342251	0.267905	-0.394548	0.286517	0.347449	0.14884	0.277748	0.873591	0.0726767	0.620216	0.283153	0.399373	-0.994534	0.307646
-4.79344	-0.296793	-0.00876111	0.986449	0.545521	0.468232	-0.75118	-0.156694	0.549919	-0.341452	0.268079	-0.39386	0.285619	0.347673	0.148937	0.277077	0.873695	0.0723631	0.620749	0.282926	0.399879	-0.994657	0.308596
-4.79296	-0.297069	-0.00859113	0.986755	0.544186	0.469568	-0.751634	-0.155461	0.549941	-0.340116	0.267994	-0.392893	0.285101	0.347679	0.14931	0.276979	0.873884	0.0722529	0.621247	0.282918	0.400576	-0.994545	0.308897
-4.79248	-0.297545	-0.00843526	0.987291	0.543407	0.470716	-0.751653	-0.154515	0.549891	-0.339422	0.267925	-0.391431	0.284831	0.348026	0.149632	0.276307	0.872929	0.0721761	0.621671	0.283103	0.401005	-0.994526	0.309208
-4.792	-0.298142	-0.00845786	0.987527	0.544326	0.471454	-0.751733	-0.153559	0.549842	-0.339091	0.268097	-0.390522	0.284508	0.348205	0.149698	0.276279	0.873321	0.0721648	0.621887	0.282519	0.401662	-0.994422	0.309707
-4.79152	-0.298128	-0.00890703	0.988638	0.543593	0.472605	-0.751183	-0.152977	0.549959	-0.339273	0.267361	-0.389703	0.283911	0.348746	0.149889	0.276987	0.873347	0.0723357	0.622494	0.282272	0.402276	-0.994235	0.310055
-4.79104	-0.299083	-0.00899217	0.988685	0.542832	0.473634	-0.751347	-0.152841	0.55008	-0.338685	0.26721	-0.388499	0.282966	0.349019	0.150166	0.276746	0.873441	0.0720902	0.622863	0.281695	0.403168	-0.994249	0.310081
-4.79056	-0.300127	-0.00822837	0.988951	0.541803	0.474606	-0.75177	-0.15217	0.550205	-0.338404	0.267531	-0.387679	0.282158	0.349241	0.149497	0.276473	0.873561	0.0720227	0.623356	0.281451	0.403544	-0.994464	0.310263
-4.79008	-0.300072	-0.00838552	0.989263	0.540882	0.475978	-0.751438	-0.150738	0.550252	-0.338214	0.267829	-0.386105	0.281592	0.349469	0.149642	0.276602	0.873196	0.071834	0.623319	0.281016	0.403929	-0.993865	0.310839
-4.7896	-0.301219	-0.00836424	0.990471	0.540509	0.476872	-0.752004	-0.150303	0.550182	-0.338386	0.267349	-0.384774	0.280552	0.350069	0.14922	0.276957	0.873557	0.0716072	0.623436	0.281029	0.404382	-0.994285	0.310966
-4.78912	-0.302041	-0.00796291	0.991318	0.539699	0.477992	-0.752612	-0.149774	0.550186	-0.338559	0.268031	-0.3841	0.280076	0.35048	0.149078	0.276922	0.87386	0.0714838	0.624069	0.281263	0.404776	-0.994663	0.311528
-4.78864	-0.302162	-0.00783557	0.991399	0.539348	0.479124	-0.751792	-0.148906	0.550204	-0.337865	0.268119	-0.383556	0.279437	0.350762	0.149268	0.276967	0.874366	0.0712304	0.624229	0.280884	0.405137	-0.994177	0.31195
-4.78816	-0.302745	-0.00838909	0.990982	0.538534	0.479826	-0.752012	-0.147649	0.550295	-0.337701	0.268365	-0.3825	0.278774	0.35122	0.149145	0.277359	0.873967	0.0711569	0.624285	0.281007	0.404984	-0.994578	0.312484
-4.78768	-0.303282	-0.00849016	0.991697	0.536314	0.480762	-0.753243	-0.147061	0.550308	-0.33777	0.268486	-0.381376	0.278024	0.351724	0.148674	0.276959	0.87481	0.0709168	0.624726	0.281258	0.405495	-0.994395	0.312386
-4.7872	-0.30381	-0.00853423	0.992186	0.536223	0.481726	-0.753358	-0.146084	0.550364	-0.337389	0.268041	-0.38056	0.277792	0.351955	0.148297	0.277198	0.874994	0.0704735	0.625115	0.281026	0.405696	-0.994188	0.312702
-4.78672	-0.304585	-0.00874307	0.991763	0.533691	0.482484	-0.754353	-0.144729	0.550268	-0.337117	0.268073	-0.380445	0.2774	0.352332	0.148071	0.277198	0.875446	0.0702189	0.625041	0.280838	0.406204	-0.994148	0.3129
-4.78624	-0.304708	-0.00970003	0.993146	0.532445	0.483829	-0.754444	-0.14363	0.550325	-0.336647	0.268168	-0.379393	0.276834	0.352697	0.147837	0.277243	0.875339	0.0699943	0.625103	0.28065	0.406309	-0.994112	0.313065
-4.78576	-0.305653	-0.00945999	0.993121	0.530981	0.484624	-0.753554	-0.143129	0.55017	-0.336042	0.268228	-0.378878	0.27657	0.353017	0.147817	0.277606	0.875311	0.069568	0.624962	0.280433	0.406851	-0.993754	0.313296
-4.78528	-0.306345	-0.00990035	0.994238	0.530228	0.486169	-0.753609	-0.142134	0.550169	-0.335813	0.268469	-0.37681	0.275948	0.353455	0.147842	0.27794	0.876015	0.0693728	0.625162	0.280293	0.406889	-0.994096	0.313477
-4.7848	-0.30705	-0.0100975	0.99451	0.529357	0.487321	-0.75375	-0.142205	0.550017	-0.335362	0.269342	-0.376419	0.27552	0.353974	0.147461	0.278181	0.8762	0.0694784	0.625354	0.28024	0.406977	-0.993969	0.313332
-4.78432	-0.307524	-0.00988723	0.994736	0.528732	0.487996	-0.755601	-0.141375	0.550063	-0.335699	0.269931	-0.374938	0.275067	0.354263	0.147547	0.278941	0.875908	0.069387	0.625493	0.28026	0.40732	-0.994213	0.313053
-4.78384	-0.307637	-0.010283	0.99513	0.528386	0.489132	-0.755569	-0.141029	0.549963	-0.335536	0.271072	-0.37417	0.273894	0.354193	0.147869	0.279202	0.875703	0.0691348	0.625784	0.280178	0.407296	-0.993917	0.313464
-4.78336	-0.307693	-0.0110337	0.995443	0.528957	0.490473	-0.756421	-0.140258	0.549876	-0.334372	0.271181	-0.373249	0.272709	0.354303	0.147868	0.27944	0.876608	0.0687978	0.625565	0.280039	0.407725	-0.993427	0.313962
-4.78288	-0.307429	-0.011144	0.995503	0.527489	0.491778	-0.757055	-0.139513	0.549659	-0.334092	0.272108	-0.371727	0.272167	0.354521	0.148096	0.279274	0.877027	0.0684165	0.625746	0.280153	0.407734	-0.993004	0.314495
-4.7824	-0.308389	-0.0117022	0.996225	0.526757	0.492293	-0.757456	-0.139067	0.549485	-0.333562	0.272608	-0.370846	0.271441	0.354494	0.148121	0.279161	0.877138	0.0680878	0.625572	0.279975	0.407734	-0.992623	0.314385
-4.78192	-0.307634	-0.0122893	0.996549	0.526861	0.493323	-0.759932	-0.138715	0.549618	-0.332135	0.273131	-0.370671	0.27047	0.35492	0.147818	0.278787	0.877437	0.067882	0.626167	0.280011	0.408152	-0.992921	0.314267
-4.78144	-0.306934	-0.0127474	0.996658	0.527189	0.493927	-0.760213	-0.138229	0.54942	-0.332142	0.273952	-0.370481	0.270473	0.355407	0.148056	0.279004	0.877416	0.0675813	0.626236	0.280447	0.408683	-0.993383	0.31423
-4.78096	-0.307175	-0.0127622	0.99706	0.526332	0.494272	-0.760617	-0.137975	0.549153	-0.331753	0.274769	-0.369838	0.270488	0.355582	0.147765	0.27846	0.877046	0.0677424	0.626516	0.280099	0.409127	-0.993194	0.314796
-4.78048	-0.307356	-0.0131886	0.997142	0.526221	0.495907	-0.760475	-0.137554	0.548958	-0.331045	0.275542	-0.368788	0.269955	0.355603	0.147849	0.278553	0.877577	0.0677047	0.626924	0.280032	0.409594	-0.992891	0.31478
-4.78	-0.307507	-0.0133241	0.996706	0.525562	0.496728	-0.76041	-0.136956	0.548925	-0.330328	0.276024	-0.36732	0.269729	0.355679	0.148325	0.278518	0.87712	0.0671586	0.626896	0.280095	0.409906	-0.992584	0.314784
-4.77952	-0.3078	-0.0127501	0.99743	0.524323	0.497806	-0.761029	-0.135874	0.548934	-0.329669	0.276592	-0.366715	0.268595	0.355411	0.149042	0.278569	0.877366	0.0667272	0.627169	0.279931	0.410168	-0.992248	0.315312
-4.77904	-0.307489	-0.0131818	0.997342	0.523792	0.498834	-0.760502	-0.135648	0.548848	-0.329478	0.277278	-0.36599	0.268308	0.355198	0.149136	0.278165	0.877519	0.0663582	0.627106	0.28003	0.410373	-0.992164	0.315591
-4.77856	-0.307788	-0.0131729	0.997707	0.522297	0.500306	-0.76074	-0.135007	0.548498	-0.328528	0.277891	-0.364491	0.267927	0.355218	0.149275	0.278506	0.877372	0.0660516	0.62756	0.279809	0.410636	-0.99176	0.3157
-4.77808	-0.307777	-0.0131332	0.997894	0.521858	0.500898	-0.76201	-0.133837	0.548617	-0.327411	0.278782	-0.363911	0.267587	0.355184	0.150078	0.278881	0.878151	0.0658567	0.627806	0.279849	0.410888	-0.990988	0.315909
-4.7776	-0.307967	-0.0131579	0.998095	0.522044	0.502054	-0.76325	-0.133282	0.548403	-0.326757	0.279732	-0.363163	0.268184	0.355369	0.150765	0.279113	0.878389	0.0654817	0.62804	0.279709	0.411241	-0.990594	0.315964
-4.77712	-0.308114	-0.013206	0.998119	0.520832	0.50337	-0.763469	-0.13252	0.548497	-0.325583	0.280466	-0.362585	0.26778	0.355402	0.15091	0.279344	0.878229	0.0651911	0.628205	0.279524	0.410978	-0.990513	0.316147
-4.77664	-0.308177	-0.0130816	0.998029	0.520479	0.504843	-0.764723	-0.131618	0.548428	-0.324246	0.28112	-0.361793	0.266761	0.355516	0.15123	0.279756	0.877966	0.0647511	0.628192	0.279196	0.411154	-0.990086	0.316653
-4.77616	-0.30885	-0.0125461	0.997799	0.519267	0.506406	-0.764016	-0.130642	0.548337	-0.324303	0.281795	-0.360424	0.266156	0.355538	0.151482	0.279935	0.878179	0.0645394	0.628673	0.279223	0.411249	-0.989493	0.316903
-4.77568	-0.308636	-0.0126725	0.997679	0.519555	0.507785	-0.763773	-0.130191	0.548066	-0.323314	0.28218	-0.360109	0.265837	0.355449	0.151406	0.279996	0.878768	0.0642421	0.629169	0.279447	0.411406	-0.989339	0.31675
-4.7752	-0.309061	-0.0128668	0.997786	0.518613	0.508687	-0.764342	-0.129153	0.548012	-0.322968	0.282136	-0.359428	0.264663	0.355297	0.151872	0.280009	0.879016	0.063969	0.629259	0.279178	0.411741	-0.989735	0.317118
-4.77472	-0.309071	-0.0130069	0.99831	0.517339	0.510359	-0.764014	-0.12852	0.547958	-0.322673	0.282842	-0.358318	0.263252	0.355119	0.151858	0.279993	0.879572	0.0637941	0.629262	0.279283	0.412166	-0.989196	0.31712
-4.77424	-0.308899	-0.0129495	0.998085	0.51682	0.511803	-0.764321	-0.128308	0.547916	-0.322623	0.282626	-0.358587	0.2622	0.355119	0.151968	0.279897	0.880218	0.0631128	0.629008	0.279304	0.41239	-0.989438	0.317303
-4.77376	-0.308989	-0.0127053	0.998731	0.515994	0.513067	-0.763433	-0.128733	0.54766	-0.320774	0.282899	-0.3572	0.261547	0.355169	0.152484	0.279919	0.879532	0.0627519	0.629209	0.279487	0.412368	-0.989435	0.317622
-4.77328	-0.308942	-0.0126466	0.998882	0.51539	0.514116	-0.762883	-0.128151	0.547698	-0.319135	0.283463	-0.356767	0.261764	0.355175	0.153083	0.279884	0.879225	0.0623591	0.62943	0.27982	0.412481	-0.989178	0.317641
-4.7728	-0.309472	-0.0126781	0.999009	0.515679	0.515526	-0.763027	-0.127501	0.547562	-0.31803	0.283591	-0.355985	0.262022	0.355351	0.152918	0.279821	0.878294	0.0618807	0.629888	0.279895	0.412607	-0.989109	0.318138
-4.77232	-0.309221	-0.0125531	0.999312	0.515424	0.516556	-0.762676	-0.126575	0.547506	-0.317558	0.283556	-0.356967	0.261124	0.355595	0.152934	0.27984	0.878084	0.0617088	0.629639	0.279935	0.412823	-0.989265	0.318466
-4.77184	-0.309198	-0.0120228	0.999511	0.513435	0.517654	-0.763042	-0.126261	0.547472	-0.317435	0.283381	-0.356502	0.26038	0.355468	0.152707	0.279583	0.876003	0.0612037	0.629847	0.2801	0.413151	-0.988944	0.318147
-4.77136	-0.309903	-0.0123775	0.999866	0.5129	0.518718	-0.762633	-0.125381	0.547332	-0.316247	0.283323	-0.354981	0.259776	0.355155	0.152993	0.279472	0.875225	0.0608847	0.630084	0.280106	0.413124	-0.988883	0.318613
-4.77088	-0.309912	-0.0118425	1.00073	0.512786	0.519883	-0.764509	-0.124883	0.547255	-0.316363	0.28372	-0.354491	0.26055	0.355405	0.153426	0.279476	0.875003	0.0606373	0.629748	0.280242	0.4134	-0.988707	0.318489
-4.7704	-0.310061	-0.0120255	1.00132	0.511699	0.521133	-0.764866	-0.124058	0.547328	-0.316474	0.283902	-0.353856	0.260953	0.355761	0.153316	0.279872	0.87354	0.0601656	0.629402	0.280616	0.413803	-0.988503	0.318675
-4.76992	-0.309952	-0.0115827	1.00138	0.512046	0.521965	-0.764956	-0.123643	0.547217	-0.315563	0.283902	-0.35375	0.260112	0.35595	0.153585	0.279878	0.87313	0.0596836	0.629216	0.280553	0.413757	-0.988571	0.318594
-4.76944	-0.31071	-0.0108187	1.00148	0.510861	0.522618	-0.765477	-0.123197	0.547142	-0.314899	0.283925	-0.353469	0.259604	0.35604	0.153648	0.280257	0.873377	0.059408	0.629045	0.280854	0.413882	-0.988522	0.318402
-4.76896	-0.310389	-0.0106446	1.00183	0.511642	0.52334	-0.767137	-0.121597	0.547052	-0.313419	0.284232	-0.352474	0.259072	0.355725	0.153561	0.28036	0.872857	0.058828	0.629085	0.280771	0.413944	-0.988557	0.318301
-4.76848	-0.310867	-0.0101334	1.00185	0.51127	0.523953	-0.768833	-0.121177	0.546945	-0.311183	0.283749	-0.351249	0.258152	0.355562	0.153229	0.280526	0.871935	0.0583625	0.629079	0.280754	0.414404	-0.987954	0.318697
-4.768	-0.311348	-0.00958056	1.00177	0.509825	0.524697	-0.768927	-0.119862	0.546778	-0.309964	0.283595	-0.350349	0.25743	0.355692	0.152961	0.280744	0.870512	0.0578167	0.629173	0.28067	0.414578	-0.987711	0.318843
-4.76752	-0.311396	-0.00946166	1.00219	0.508906	0.525398	-0.768588	-0.119287	0.546646	-0.308935	0.284044	-0.349775	0.256497	0.356138	0.153007	0.281138	0.870165	0.0575211	0.629436	0.281022	0.415001	-0.988109	0.318818
-4.76704	-0.312493	-0.00887694	1.00176	0.509521	0.525641	-0.768139	-0.118661	0.546497	-0.30842	0.283666	-0.349124	0.255642	0.356631	0.152907	0.281588	0.869256	0.0570716	0.629458	0.280928	0.415393	-0.988384	0.319094
-4.76656	-0.313096	-0.00808605	1.00174	0.508868	0.526829	-0.767469	-0.117859	0.546494	-0.308525	0.283564	-0.3488	0.254682	0.356807	0.153058	0.282047	0.868252	0.0567483	0.629153	0.281227	0.41547	-0.988305	0.318952
-4.76608	-0.312842	-0.0075213	1.00183	0.508588	0.52744	-0.767382	-0.117293	0.546443	-0.307658	0.283145	-0.348287	0.254356	0.356666	0.153054	0.282393	0.867968	0.0566396	0.629293	0.281559	0.41624	-0.988133	0.319116
-4.7656	-0.312046	-0.00742764	1.00316	0.50658	0.527842	-0.767152	-0.116533	0.546547	-0.307136	0.282517	-0.347719	0.2537	0.356575	0.153392	0.28277	0.867138	0.0562453	0.629419	0.281839	0.41637	-0.987933	0.319493
-4.76512	-0.3119	-0.00708899	1.00255	0.505488	0.528536	-0.768061	-0.116039	0.546409	-0.307101	0.282358	-0.34655	0.253275	0.3565	0.153564	0.282758	0.866085	0.0556553	0.629488	0.281683	0.416619	-0.987961	0.319974
-4.76464	-0.311451	-0.00618145	1.003	0.504857	0.529373	-0.768367	-0.115804	0.546361	-0.306123	0.282085	-0.344889	0.252666	0.356398	0.153545	0.28273	0.865682	0.0554469	0.629701	0.281864	0.417007	-0.988151	0.320029
-4.76416	-0.311252	-0.00525712	1.00323	0.504046	0.530555	-0.768391	-0.115368	0.546279	-0.305921	0.282238	-0.344269	0.252727	0.356739	0.153735	0.28248	0.864695	0.0549571	0.629635	0.281854	0.417712	-0.987826	0.320305
-4.76368	-0.311674	-0.00431264	1.00349	0.502536	0.530967	-0.76906	-0.114919	0.546193	-0.304754	0.281793	-0.343192	0.252291	0.356914	0.154088	0.2826	0.86406	0.0545816	0.629297	0.281525	0.418117	-0.988283	0.320219
-4.7632	-0.310356	-0.00410415	1.0038	0.501227	0.531579	-0.769402	-0.114223	0.546054	-0.303811	0.28172	-0.343063	0.251487	0.357238	0.154319	0.282845	0.863468	0.0542354	0.628977	0.28174	0.418553	-0.988314	0.320348
-4.76272	-0.308617	-0.00403969	1.00425	0.500164	0.532359	-0.768846	-0.113642	0.546097	-0.302732	0.281467	-0.342282	0.251324	0.357371	0.154279	0.283731	0.863906	0.0538799	0.629049	0.282186	0.418997	-0.988522	0.320616
-4.76224	-0.307953	-0.00315996	1.00471	0.49949	0.533358	-0.769227	-0.113725	0.546012	-0.302378	0.281269	-0.340872	0.250744	0.357596	0.154141	0.283466	0.863781	0.0535187	0.629284	0.282758	0.419438	-0.988051	0.320529
-4.76176	-0.307375	-0.00281528	1.00548	0.499572	0.53366	-0.768403	-0.113317	0.545796	-0.301145	0.281978	-0.339967	0.251034	0.358201	0.154532	0.284193	0.864018	0.0528731	0.629247	0.282759	0.419703	-0.987919	0.320762
-4.76128	-0.307065	-0.00266305	1.00595	0.499128	0.534889	-0.769006	-0.113743	0.545631	-0.300406	0.282206	-0.33921	0.25127	0.357875	0.154983	0.284293	0.86396	0.0523183	0.629332	0.282852	0.41981	-0.988138	0.321168
-4.7608	-0.3061	-0.00266943	1.00637	0.498941	0.536182	-0.768692	-0.113529	0.545672	-0.300278	0.282521	-0.337779	0.25135	0.357772	0.154841	0.284456	0.863677	0.0522777	0.629395	0.282728	0.420559	-0.988096	0.321242
-4.76032	-0.306141	-0.00185081	1.0067	0.498561	0.53696	-0.769072	-0.112953	0.54586	-0.299674	0.283073	-0.33667	0.25106	0.35783	0.155113	0.284297	0.863866	0.0517827	0.629573	0.282889	0.421148	-0.987946	0.321449
-4.75984	-0.3064	-0.00178528	1.00681	0.497267	0.538061	-0.768757	-0.112174	0.545666	-0.29972	0.282739	-0.335938	0.250872	0.358288	0.155012	0.283826	0.863453	0.0514406	0.629366	0.283037	0.421302	-0.98794	0.321868
-4.75936	-0.305909	-0.00135147	1.0076	0.496674	0.538769	-0.770168	-0.111919	0.545818	-0.299674	0.282618	-0.335177	0.249922	0.358428	0.155019	0.283713	0.86336	0.0509697	0.629501	0.282889	0.421577	-0.987981	0.322227
-4.75888	-0.305645	-0.000734418	1.00815	0.496666	0.539964	-0.77035	-0.111965	0.546045	-0.299552	0.282484	-0.334616	0.249405	0.358581	0.155088	0.283745	0.863048	0.0507923	0.629358	0.283326	0.421727	-0.989032	0.322119
-4.7584	-0.305244	-8.40659e-05	1.00874	0.494933	0.541191	-0.770417	-0.111098	0.546133	-0.299196	0.282125	-0.333547	0.248447	0.358739	0.155203	0.284038	0.862672	0.0506854	0.629406	0.283411	0.422315	-0.989525	0.322045
-4.75792	-0.304594	-5.97161e-05	1.0092	0.493789	0.54201	-0.770583	-0.110263	0.546152	-0.298986	0.282101	-0.332802	0.24755	0.358625	0.155225	0.283831	0.861482	0.0504309	0.629445	0.283514	0.422759	-0.989692	0.322409
-4.75744	-0.303984	-2.63464e-05	1.00929	0.493578	0.543359	-0.771398	-0.109684	0.546186	-0.298658	0.281894	-0.332008	0.246419	0.358121	0.155258	0.283455	0.861505	0.0501564	0.629281	0.28361	0.423267	-0.990559	0.322652
-4.75696	-0.303122	-0.000290487	1.00936	0.493698	0.54425	-0.77058	-0.109934	0.546076	-0.298532	0.282552	-0.332065	0.245549	0.358049	0.155047	0.283728	0.860977	0.0500567	0.628982	0.283449	0.423946	-0.991298	0.322882
-4.75648	-0.302981	0.000112908	1.00967	0.494045	0.545037	-0.771191	-0.109438	0.546097	-0.29828	0.28282	-0.331566	0.244694	0.358176	0.154934	0.28383	0.860908	0.0497515	0.628771	0.283482	0.424566	-0.992368	0.323214
-4.756	-0.30305	0.000608997	1.00995	0.493101	0.545808	-0.770042	-0.109311	0.546128	-0.297816	0.282826	-0.330242	0.243602	0.358371	0.154439	0.28391	0.861626	0.0496854	0.628608	0.283438	0.424923	-0.992556	0.323523
-4.75552	-0.302228	0.000908219	1.00981	0.493371	0.547202	-0.770358	-0.108891	0.546106	-0.297908	0.282733	-0.329573	0.242929	0.358896	0.154528	0.284225	0.861751	0.0495611	0.628772	0.28319	0.425133	-0.992552	0.323969
-4.75504	-0.302084	0.00099257	1.01107	0.49233	0.548228	-0.770542	-0.109318	0.546215	-0.297146	0.282674	-0.329146	0.241909	0.359028	0.154724	0.284194	0.861659	0.0495133	0.628643	0.283086	0.425291	-0.992546	0.324277
-4.75456	-0.302229	0.00116787	1.01211	0.492962	0.548922	-0.77139	-0.109242	0.546296	-0.297694	0.282321	-0.328111	0.24153	0.359203	0.155108	0.284197	0.861007	0.0494054	0.628718	0.283005	0.426089	-0.99261	0.324536
-4.75408	-0.302363	0.000970145	1.01278	0.493072	0.549714	-0.772836	-0.109579	0.546489	-0.298096	0.282218	-0.327525	0.240563	0.359442	0.154972	0.284703	0.860567	0.049276	0.628387	0.282876	0.426678	-0.9924	0.325275
-4.7536	-0.302055	0.000944084	1.01258	0.493695	0.550772	-0.772991	-0.108797	0.54639	-0.298296	0.281824	-0.32699	0.239994	0.359158	0.154711	0.285161	0.86025	0.0494691	0.628329	0.28262	0.426436	-0.992455	0.325671
-4.75312	-0.301847	0.00119272	1.01321	0.493375	0.552002	-0.772349	-0.108498	0.546653	-0.298014	0.281661	-0.326702	0.239425	0.359438	0.154248	0.285329	0.860116	0.0491651	0.628718	0.282684	0.427249	-0.992624	0.325766
-4.75264	-0.302258	0.00178638	1.01372	0.493875	0.552407	-0.77305	-0.107461	0.546896	-0.297488	0.281554	-0.32669	0.238785	0.359944	0.154149	0.285357	0.860293	0.0491061	0.628606	0.282492	0.427927	-0.99356	0.326391
-4.75216	-0.302099	0.0020604	1.01345	0.494762	0.553706	-0.773003	-0.106902	0.547106	-0.297479	0.281599	-0.32637	0.238509	0.360333	0.153616	0.285708	0.859725	0.0493034	0.62827	0.282099	0.428098	-0.99384	0.326652
-4.75168	-0.301785	0.00196478	1.01357	0.494878	0.554919	-0.773151	-0.106555	0.547182	-0.29648	0.281836	-0.326186	0.238327	0.360029	0.154302	0.285803	0.85911	0.0492967	0.628572	0.281887	0.427978	-0.994737	0.326727
-4.7512	-0.301984	0.00229527	1.01421	0.493779	0.556013	-0.773678	-0.106702	0.547298	-0.296548	0.28215	-0.325628	0.238117	0.360419	0.154709	0.286267	0.859346	0.0493545	0.628736	0.281704	0.428368	-0.995591	0.327212
-4.75072	-0.301476	0.00211912	1.01437	0.492759	0.55665	-0.775318	-0.106649	0.547528	-0.296194	0.281819	-0.324762	0.238147	0.36064	0.154863	0.286884	0.859068	0.0489835	0.628736	0.281854	0.428407	-0.99598	0.328064
-4.75024	-0.301734	0.00208607	1.01487	0.492757	0.556962	-0.77574	-0.106538	0.547474	-0.295602	0.28181	-0.324311	0.238455	0.360567	0.154745	0.286562	0.859415	0.0488942	0.629128	0.281763	0.428504	-0.996455	0.328745
-4.74976	-0.301729	0.00235866	1.01564	0.49279	0.557576	-0.775516	-0.10676	0.547451	-0.295167	0.281495	-0.32405	0.237976	0.36089	0.155315	0.286542	0.858301	0.0485653	0.629275	0.281679	0.429084	-0.996475	0.329214
-4.74928	-0.301731	0.00258173	1.01598	0.493553	0.558483	-0.774752	-0.107193	0.547597	-0.294773	0.28118	-0.323312	0.237426	0.361341	0.155005	0.286586	0.858036	0.0485282	0.629209	0.281448	0.429766	-0.996877	0.329429
-4.7488	-0.30243	0.00256957	1.01691	0.493711	0.558856	-0.774131	-0.106717	0.54767	-0.294423	0.280744	-0.322702	0.237178	0.361322	0.155247	0.28711	0.857625	0.0483255	0.628689	0.281644	0.429905	-0.997337	0.329767
-4.74832	-0.303128	0.00246836	1.01752	0.495081	0.55958	-0.774076	-0.106807	0.548018	-0.29414	0.280477	-0.321923	0.237552	0.361363	0.155177	0.286877	0.856516	0.0481695	0.628336	0.281478	0.43006	-0.997666	0.329644
-4.74784	-0.303405	0.0026007	1.01811	0.495813	0.560479	-0.773609	-0.107059	0.548215	-0.29458	0.280364	-0.32131	0.237487	0.361601	0.155199	0.287109	0.856356	0.0479857	0.628917	0.281641	0.430166	-0.997901	0.329904
-4.74736	-0.303156	0.00281749	1.01888	0.496698	0.561106	-0.773203	-0.107154	0.548447	-0.295028	0.280522	-0.320889	0.237495	0.361921	0.154597	0.287306	0.855902	0.047722	0.62933	0.281672	0.430561	-0.99839	0.330193
-4.74688	-0.303179	0.00303917	1.01926	0.496524	0.561607	-0.77367	-0.107336	0.548699	-0.295131	0.28084	-0.320594	0.236969	0.362542	0.154425	0.287374	0.85575	0.0475203	0.62921	0.281488	0.430885	-0.998447	0.330546
-4.7464	-0.303466	0.00267118	1.01951	0.496196	0.562137	-0.772812	-0.107448	0.548863	-0.294598	0.280609	-0.320198	0.236469	0.362926	0.1543	0.287816	0.85556	0.0475037	0.629592	0.281615	0.430914	-0.998551	0.330438
-4.74592	-0.30313	0.00263207	1.01988	0.495314	0.563125	-0.773426	-0.107391	0.548958	-0.294656	0.280239	-0.320536	0.236715	0.36323	0.154695	0.288048	0.855505	0.0474583	0.629873	0.281333	0.431553	-0.999447	0.330417
-4.74544	-0.303091	0.0027197	1.02032	0.495993	0.564262	-0.773719	-0.107034	0.549337	-0.293258	0.280739	-0.319958	0.236676	0.36353	0.15474	0.28804	0.855797	0.0473221	0.629859	0.28136	0.431878	-0.999709	0.330218
-4.74496	-0.303413	0.00251659	1.02103	0.494905	0.565068	-0.776515	-0.10714	0.54969	-0.293357	0.280425	-0.318963	0.236593	0.363973	0.154874	0.288273	0.855569	0.0475389	0.629527	0.281282	0.432609	-1.0001	0.330051
-4.74448	-0.303521	0.0025002	1.02214	0.495779	0.56603	-0.777749	-0.107609	0.550083	-0.293142	0.280113	-0.319247	0.236575	0.364068	0.154946	0.288614	0.856473	0.0475555	0.629508	0.281255	0.432948	-1.00022	0.330116
-4.744	-0.303519	0.00231484	1.0228	0.495992	0.566393	-0.779972	-0.107552	0.550329	-0.293152	0.279533	-0.318077	0.235999	0.36447	0.154713	0.288326	0.856147	0.0472183	0.629514	0.280994	0.433207	-1.00079	0.330345
-4.74352	-0.303366	0.00269674	1.02392	0.49629	0.566702	-0.783585	-0.10812	0.550446	-0.293083	0.27957	-0.317473	0.235141	0.364917	0.155364	0.288257	0.855978	0.0470588	0.629737	0.281507	0.432762	-1.00158	0.330503
-4.74304	-0.303302	0.00242019	1.02385	0.496454	0.567124	-0.785215	-0.108149	0.550657	-0.29337	0.279206	-0.317591	0.234677	0.365219	0.154989	0.288373	0.854775	0.0469362	0.629551	0.281906	0.432696	-1.0016	0.331269
-4.74256	-0.303199	0.00201559	1.02427	0.496636	0.567063	-0.785909	-0.108157	0.550743	-0.293361	0.279434	-0.317015	0.234193	0.365705	0.155185	0.288493	0.85453	0.0466734	0.629068	0.282055	0.43283	-1.00227	0.331236
-4.74208	-0.303487	0.00208539	1.02507	0.496283	0.567851	-0.788095	-0.108484	0.550549	-0.292768	0.279411	-0.317032	0.234533	0.366184	0.155446	0.288436	0.854142	0.046463	0.628971	0.281681	0.433217	-1.00234	0.330906
-4.7416	-0.304039	0.00217281	1.0258	0.496203	0.56846	-0.79023	-0.108553	0.550619	-0.2923	0.278929	-0.317085	0.234503	0.366263	0.155493	0.288789	0.853677	0.0463868	0.628963	0.281907	0.433369	-1.00252	0.330227
-4.74112	-0.303233	0.00256854	1.02563	0.495644	0.569377	-0.791391	-0.108363	0.55097	-0.290328	0.278597	-0.317361	0.234566	0.36676	0.155519	0.288914	0.853111	0.0461393	0.628729	0.281911	0.43322	-1.00298	0.330605
-4.74064	-0.30303	0.00283892	1.02617	0.495171	0.569611	-0.791089	-0.108394	0.550885	-0.289466	0.278534	-0.316912	0.234413	0.367156	0.155362	0.289144	0.853566	0.0461939	0.628864	0.282184	0.433704	-1.00312	0.330462
-4.74016	-0.302544	0.0029873	1.02716	0.494788	0.570325	-0.792896	-0.10818	0.550938	-0.288777	0.2787	-0.317533	0.234161	0.367255	0.155736	0.289615	0.853026	0.0459994	0.629289	0.282353	0.433946	-1.00373	0.330569
-4.73968	-0.302033	0.00311757	1.02781	0.494839	0.571109	-0.79334	-0.107925	0.551092	-0.288486	0.278689	-0.316816	0.234024	0.367729	0.155522	0.289721	0.853396	0.0458372	0.629254	0.282312	0.433817	-1.0037	0.330044
-4.7392	-0.302057	0.0029376	1.02809	0.495404	0.571748	-0.794441	-0.108565	0.55109	-0.287622	0.278975	-0.316256	0.234461	0.367808	0.155199	0.290013	0.853051	0.0455332	0.629626	0.282267	0.434154	-1.00383	0.329811
-4.73872	-0.301037	0.00323558	1.02857	0.495166	0.572097	-0.794609	-0.109217	0.551336	-0.287726	0.278946	-0.31579	0.234552	0.368063	0.155129	0.289551	0.852672	0.045171	0.629788	0.282489	0.434637	-1.00393	0.329605
-4.73824	-0.301153	0.00309415	1.02913	0.494421	0.573487	-0.795529	-0.108892	0.55154	-0.28745	0.279025	-0.316196	0.23408	0.368362	0.154956	0.290216	0.852006	0.0449025	0.629775	0.282302	0.43471	-1.00444	0.329901
-4.73776	-0.300973	0.003177	1.02972	0.493935	0.573762	-0.797335	-0.108492	0.551493	-0.287607	0.278768	-0.315801	0.233674	0.36852	0.154346	0.290228	0.851847	0.044701	0.62952	0.282519	0.434924	-1.00454	0.329898
-4.73728	-0.30072	0.00310039	1.03019	0.493737	0.574747	-0.798796	-0.108356	0.551616	-0.288526	0.278751	-0.315443	0.233938	0.368602	0.154461	0.290179	0.851122	0.0443593	0.629488	0.282897	0.435091	-1.00581	0.329658
-4.7368	-0.300077	0.00365847	1.03029	0.49358	0.57536	-0.799464	-0.108381	0.551687	-0.288628	0.278979	-0.315607	0.233349	0.368819	0.15447	0.29017	0.850818	0.0439381	0.62948	0.282665	0.434743	-1.00638	0.329576
-4.73632	-0.299938	0.00347608	1.031	0.493477	0.575839	-0.800665	-0.108836	0.551951	-0.288067	0.278559	-0.314693	0.232853	0.36901	0.154145	0.290057	0.850695	0.0438935	0.629631	0.282501	0.435082	-1.00633	0.329686
-4.73584	-0.299943	0.00328171	1.0315	0.493478	0.576219	-0.799765	-0.108684	0.552208	-0.287573	0.278987	-0.315086	0.232172	0.369275	0.154694	0.289836	0.850036	0.0437594	0.629147	0.282213	0.435369	-1.00709	0.329812
-4.73536	-0.29902	0.00388678	1.03214	0.493457	0.576428	-0.800437	-0.108597	0.552359	-0.287599	0.279346	-0.314545	0.232054	0.36938	0.154713	0.290174	0.850157	0.043466	0.629645	0.282071	0.435403	-1.00775	0.329971
-4.73488	-0.298825	0.00348506	1.03244	0.493961	0.577047	-0.800415	-0.109095	0.552759	-0.28786	0.278951	-0.31387	0.231938	0.369521	0.154669	0.290081	0.850156	0.0432697	0.629807	0.281703	0.435966	-1.00799	0.329439
-4.7344	-0.298301	0.003766	1.03298	0.494659	0.577264	-0.801215	-0.10953	0.552927	-0.286999	0.279389	-0.313716	0.231895	0.36994	0.154537	0.289948	0.849899	0.0431722	0.63035	0.281903	0.43612	-1.00829	0.329057
-4.73392	-0.29821	0.00338873	1.03398	0.494665	0.577998	-0.801902	-0.109262	0.553252	-0.286534	0.279547	-0.314607	0.231688	0.370485	0.154649	0.290024	0.849853	0.0429386	0.630567	0.281925	0.436269	-1.00886	0.329392
-4.73344	-0.298893	0.00337804	1.03434	0.494971	0.57864	-0.80261	-0.109131	0.553308	-0.286628	0.27934	-0.315288	0.231318	0.370206	0.155268	0.290061	0.849651	0.0426696	0.631098	0.281756	0.436407	-1.009	0.329216
-4.73296	-0.298437	0.0032447	1.03525	0.494719	0.579031	-0.801391	-0.109299	0.553391	-0.286549	0.279697	-0.315662	0.230923	0.370207	0.155768	0.290205	0.849266	0.04272	0.631371	0.281611	0.436484	-1.0094	0.329284
-4.73248	-0.298836	0.00357262	1.03619	0.494745	0.579327	-0.803576	-0.109439	0.55339	-0.286507	0.279497	-0.315729	0.230232	0.370401	0.156356	0.290588	0.849078	0.0427261	0.631716	0.281894	0.436114	-1.0092	0.329224
-4.732	-0.299622	0.00385295	1.03651	0.494573	0.580002	-0.80423	-0.109831	0.553573	-0.286428	0.279728	-0.315741	0.230011	0.370575	0.156691	0.2908	0.848403	0.0425472	0.63186	0.28137	0.435669	-1.00919	0.329176
-4.73152	-0.299828	0.00431984	1.03749	0.495209	0.580307	-0.804386	-0.109893	0.553707	-0.286242	0.27958	-0.316171	0.229376	0.370827	0.157124	0.291099	0.848148	0.0424528	0.632014	0.281057	0.436154	-1.00919	0.329292
-4.73104	-0.300714	0.00472463	1.03785	0.494637	0.580929	-0.80452	-0.10979	0.553588	-0.286618	0.279169	-0.316229	0.229254	0.370731	0.157621	0.291125	0.848041	0.0425846	0.632175	0.280959	0.435868	-1.0096	0.328658
-4.73056	-0.300858	0.0044458	1.03756	0.494002	0.581783	-0.803762	-0.109908	0.553658	-0.286765	0.278959	-0.315893	0.228231	0.370974	0.157684	0.291234	0.848098	0.0425931	0.632557	0.280573	0.436146	-1.01019	0.327486
-4.73008	-0.301241	0.00424619	1.0384	0.493514	0.582351	-0.803227	-0.110334	0.553697	-0.28666	0.279175	-0.316288	0.227639	0.371061	0.158077	0.291515	0.848307	0.042373	0.632622	0.280426	0.435866	-1.01028	0.327547
-4.7296	-0.30187	0.00429749	1.0392	0.49298	0.582453	-0.802777	-0.110594	0.553651	-0.287204	0.279262	-0.316563	0.227355	0.37085	0.158452	0.291328	0.847368	0.0425201	0.632777	0.280226	0.435885	-1.01068	0.327247
-4.72912	-0.302662	0.00435606	1.03976	0.49487	0.582923	-0.802588	-0.111188	0.553521	-0.286181	0.278782	-0.316399	0.227219	0.370548	0.158824	0.29158	0.846784	0.0425517	0.63342	0.279954	0.43515	-1.0108	0.327281
-4.72864	-0.303004	0.00536849	1.04038	0.495667	0.58342	-0.801281	-0.111697	0.553573	-0.286418	0.278625	-0.316958	0.226752	0.370867	0.159164	0.291847	0.845878	0.0425967	0.633973	0.279544	0.434935	-1.01131	0.326625
-4.72816	-0.303722	0.00530346	1.04051	0.495426	0.583651	-0.801331	-0.111771	0.553656	-0.28619	0.278454	-0.317038	0.226302	0.371028	0.159927	0.29155	0.845463	0.0426217	0.634236	0.279504	0.434955	-1.01132	0.326235
-4.72768	-0.303418	0.00552201	1.04097	0.496544	0.584106	-0.800943	-0.112222	0.553769	-0.285478	0.278704	-0.316551	0.225673	0.371094	0.160478	0.291567	0.845288	0.0427574	0.634575	0.279345	0.434881	-1.01154	0.326528
-4.7272	-0.304204	0.00624035	1.04142	0.497785	0.58485	-0.801917	-0.112205	0.553701	-0.285482	0.279077	-0.317223	0.225078	0.371213	0.160871	0.291705	0.844585	0.0425066	0.634925	0.279247	0.434434	-1.01173	0.326196
-4.72672	-0.304226	0.00715869	1.04171	0.49791	0.585221	-0.801773	-0.112664	0.553522	-0.285718	0.278916	-0.316447	0.224893	0.371275	0.161363	0.29183	0.844282	0.0424582	0.635201	0.278986	0.434077	-1.01223	0.326189
-4.72624	-0.305202	0.00782056	1.04215	0.499308	0.586324	-0.801666	-0.112971	0.553479	-0.286068	0.279141	-0.316194	0.224319	0.371155	0.161659	0.291302	0.843784	0.0422652	0.635684	0.278615	0.434169	-1.01268	0.326217
-4.72576	-0.304762	0.00810445	1.04278	0.499296	0.586715	-0.801612	-0.113084	0.5536	-0.286136	0.278966	-0.315342	0.223641	0.371151	0.162136	0.291416	0.843431	0.0422093	0.636167	0.278407	0.434362	-1.01353	0.325997
-4.72528	-0.305573	0.00813368	1.04333	0.499292	0.587503	-0.802499	-0.113254	0.553451	-0.285789	0.279153	-0.315644	0.22376	0.371111	0.162539	0.290774	0.843013	0.0420707	0.636368	0.278059	0.434321	-1.01355	0.326321
-4.7248	-0.305398	0.00850021	1.04397	0.498981	0.58798	-0.80275	-0.11401	0.553318	-0.285726	0.279378	-0.315212	0.223718	0.371248	0.162403	0.290697	0.843035	0.0420252	0.636808	0.277464	0.433927	-1.01386	0.326059
-4.72432	-0.304863	0.00858193	1.04507	0.499092	0.588672	-0.803265	-0.114083	0.553322	-0.285135	0.279595	-0.314765	0.223347	0.371279	0.162634	0.290972	0.84279	0.0418535	0.637116	0.276855	0.433819	-1.01375	0.325608
-4.72384	-0.304714	0.00870435	1.0459	0.499209	0.588795	-0.802866	-0.114525	0.553353	-0.285063	0.280273	-0.31437	0.222455	0.371308	0.162457	0.290733	0.842575	0.0416279	0.637398	0.276729	0.433665	-1.01343	0.32549
-4.72336	-0.304958	0.00864489	1.04587	0.499152	0.588491	-0.803362	-0.114679	0.553467	-0.284087	0.280689	-0.314881	0.222167	0.371262	0.162829	0.290567	0.842368	0.0418547	0.637642	0.276464	0.433702	-1.01298	0.325425
-4.72288	-0.306113	0.00898935	1.04663	0.499271	0.588502	-0.802777	-0.114991	0.553292	-0.283346	0.280912	-0.314781	0.221872	0.371447	0.162894	0.290728	0.842436	0.0415902	0.63787	0.276307	0.433408	-1.01326	0.325195
-4.7224	-0.306486	0.00926868	1.0472	0.499693	0.588756	-0.803082	-0.115266	0.55331	-0.282559	0.281594	-0.314676	0.221658	0.371506	0.163167	0.290367	0.841968	0.0416578	0.63828	0.276145	0.433222	-1.01342	0.324786
-4.72192	-0.307195	0.00974302	1.04729	0.49983	0.589415	-0.80388	-0.115556	0.553487	-0.281824	0.281866	-0.315037	0.222118	0.371754	0.163644	0.289898	0.841413	0.0416324	0.638501	0.27598	0.432977	-1.01322	0.324832
-4.72144	-0.308151	0.0100404	1.04702	0.500278	0.589609	-0.804461	-0.116194	0.553294	-0.28148	0.28181	-0.315394	0.221692	0.371672	0.164124	0.290035	0.841275	0.0416848	0.638656	0.275534	0.432786	-1.01331	0.32476
-4.72096	-0.309021	0.0100823	1.0478	0.501589	0.590567	-0.804632	-0.117447	0.553025	-0.281125	0.282065	-0.315522	0.221328	0.371818	0.164491	0.289584	0.841408	0.0415983	0.638685	0.275575	0.432468	-1.01359	0.324493
-4.72048	-0.309656	0.0101469	1.04825	0.50263	0.590939	-0.804928	-0.117869	0.553191	-0.281273	0.282256	-0.314482	0.220854	0.37199	0.164893	0.289131	0.841239	0.0416884	0.639121	0.275637	0.43205	-1.01402	0.324614
-4.72	-0.309308	0.010871	1.0486	0.503485	0.591934	-0.804832	-0.118393	0.553269	-0.28052	0.282198	-0.314133	0.22046	0.372271	0.165541	0.28844	0.8411	0.0415019	0.639737	0.275827	0.43186	-1.01389	0.324632
-4.71952	-0.310278	0.0112827	1.04943	0.503402	0.592755	-0.805792	-0.118157	0.553506	-0.278922	0.282652	-0.314575	0.220362	0.372965	0.165635	0.287985	0.841249	0.0414681	0.639935	0.275969	0.431727	-1.01423	0.324447
-4.71904	-0.310949	0.0115581	1.04976	0.502763	0.593198	-0.806913	-0.117898	0.553494	-0.276471	0.282946	-0.314365	0.2201	0.37298	0.165612	0.287038	0.840994	0.0412043	0.640147	0.275719	0.431517	-1.01411	0.32408
-4.71856	-0.312263	0.0117135	1.0509	0.503441	0.593453	-0.806659	-0.118304	0.553392	-0.276395	0.283274	-0.31601	0.218756	0.373656	0.166163	0.286731	0.841004	0.0410132	0.6403	0.275566	0.431486	-1.01439	0.324157
-4.71808	-0.312286	0.0118999	1.05157	0.504253	0.593601	-0.807986	-0.118745	0.553388	-0.275112	0.283759	-0.315866	0.218634	0.373863	0.166523	0.286359	0.841026	0.0408794	0.64032	0.274964	0.431531	-1.01472	0.324066
-4.7176	-0.313141	0.0123775	1.05228	0.50313	0.594221	-0.808997	-0.118829	0.553234	-0.274091	0.283462	-0.316526	0.217702	0.373806	0.166618	0.285936	0.841276	0.0408033	0.640282	0.274689	0.431416	-1.01451	0.323841
-4.71712	-0.312963	0.0127437	1.05245	0.503262	0.59506	-0.81005	-0.119658	0.553222	-0.273111	0.283238	-0.316651	0.218041	0.374127	0.166641	0.285164	0.841308	0.0406974	0.640771	0.274914	0.431277	-1.01451	0.323976
-4.71664	-0.312431	0.012783	1.05391	0.502784	0.595307	-0.81064	-0.119648	0.553323	-0.272535	0.283487	-0.31667	0.216945	0.374484	0.166731	0.284802	0.841913	0.0407987	0.641057	0.27458	0.430954	-1.01505	0.323907
-4.71616	-0.312502	0.0134764	1.05471	0.503394	0.595482	-0.811712	-0.119717	0.553305	-0.272258	0.283322	-0.316969	0.217052	0.374495	0.166571	0.284136	0.842164	0.0407587	0.641512	0.274499	0.430607	-1.01514	0.323664
-4.71568	-0.313155	0.014016	1.05588	0.503824	0.596442	-0.812396	-0.119737	0.553362	-0.271167	0.283397	-0.317399	0.216496	0.374417	0.166956	0.283916	0.842258	0.0404877	0.641678	0.274263	0.430272	-1.01505	0.32367
-4.7152	-0.314321	0.0150297	1.05712	0.503463	0.597215	-0.81388	-0.120648	0.553379	-0.271105	0.283624	-0.317477	0.216235	0.374777	0.166998	0.283433	0.842381	0.0403018	0.641629	0.274129	0.430429	-1.01547	0.323449
-4.71472	-0.314711	0.0158213	1.0581	0.504161	0.597221	-0.814588	-0.120602	0.553707	-0.270997	0.283812	-0.318157	0.215802	0.37501	0.167	0.283261	0.842975	0.0400974	0.641758	0.274238	0.429654	-1.01536	0.324059
-4.71424	-0.316044	0.0161702	1.05995	0.504286	0.597764	-0.814706	-0.120551	0.553872	-0.270528	0.283936	-0.318094	0.215027	0.375327	0.167368	0.282939	0.843726	0.0402759	0.642516	0.273979	0.429545	-1.0159	0.324602
-4.71376	-0.317887	0.0166171	1.0607	0.505249	0.598547	-0.815436	-0.120293	0.553944	-0.269496	0.284019	-0.317671	0.214761	0.375648	0.167574	0.282317	0.843877	0.0403875	0.643019	0.274014	0.429006	-1.01521	0.324514
-4.71328	-0.319174	0.0173173	1.06134	0.50461	0.599141	-0.815369	-0.120863	0.55403	-0.269036	0.284164	-0.317864	0.215016	0.37641	0.167643	0.281781	0.844393	0.0405066	0.643895	0.274125	0.428476	-1.01442	0.324423
-4.7128	-0.32127	0.017825	1.06203	0.504152	0.599543	-0.81529	-0.120661	0.554134	-0.269061	0.284571	-0.319101	0.214327	0.376451	0.167835	0.281552	0.84491	0.0407937	0.644153	0.27395	0.428322	-1.01423	0.325108
-4.71232	-0.323253	0.0174366	1.06284	0.503543	0.599549	-0.814611	-0.121114	0.554101	-0.268826	0.284911	-0.317944	0.213653	0.376653	0.167583	0.281353	0.845185	0.0406941	0.644306	0.274451	0.428091	-1.01339	0.325674
-4.71184	-0.325562	0.0171157	1.06306	0.502654	0.59953	-0.81513	-0.121711	0.554034	-0.268575	0.285397	-0.316777	0.213397	0.376953	0.16769	0.280748	0.845117	0.040878	0.64425	0.274536	0.428085	-1.01341	0.326302
-4.71136	-0.326634	0.0170055	1.06383	0.503271	0.60001	-0.815558	-0.121939	0.554177	-0.267876	0.28572	-0.316906	0.213072	0.376902	0.167919	0.280294	0.845723	0.0409143	0.644236	0.274632	0.42811	-1.01293	0.326382
-4.71088	-0.327932	0.0179284	1.06427	0.502433	0.600427	-0.815772	-0.122393	0.554473	-0.267317	0.285616	-0.316915	0.21254	0.376617	0.168029	0.280241	0.846408	0.041164	0.644627	0.27444	0.428511	-1.0123	0.326664
-4.7104	-0.329595	0.0187034	1.06455	0.502273	0.60051	-0.814808	-0.122616	0.554384	-0.267218	0.286143	-0.315905	0.21262	0.376669	0.168272	0.279531	0.846854	0.0411589	0.64503	0.274621	0.428384	-1.01199	0.326718
-4.70992	-0.331311	0.0182103	1.06497	0.502629	0.601287	-0.814646	-0.122777	0.554251	-0.266842	0.285979	-0.315104	0.212163	0.376695	0.168306	0.279703	0.847175	0.0417299	0.645169	0.274536	0.428713	-1.01146	0.326828
-4.70944	-0.332047	0.0182611	1.06502	0.502371	0.601854	-0.814021	-0.122966	0.554041	-0.266102	0.286234	-0.31411	0.212372	0.376963	0.168004	0.279774	0.846785	0.0420277	0.64558	0.274661	0.428919	-1.01104	0.326704
-4.70896	-0.333966	0.018616	1.06591	0.502412	0.601882	-0.8144	-0.122977	0.554124	-0.265496	0.286166	-0.314115	0.212399	0.377178	0.167746	0.279806	0.846926	0.0423886	0.645723	0.274937	0.428572	-1.01053	0.326857
-4.70848	-0.335738	0.019399	1.06633	0.501969	0.602605	-0.814142	-0.123591	0.554356	-0.264913	0.286469	-0.312613	0.212403	0.377152	0.167443	0.279413	0.846967	0.0427023	0.646331	0.275627	0.428512	-1.01023	0.326599
-4.708	-0.337584	0.0192973	1.06581	0.502952	0.603675	-0.814395	-0.123534	0.554465	-0.263998	0.286772	-0.312603	0.21181	0.377354	0.167388	0.278852	0.846934	0.0428954	0.646735	0.275966	0.428372	-1.01055	0.326574
-4.70752	-0.338853	0.0199799	1.06604	0.501986	0.604398	-0.813767	-0.122947	0.554266	-0.263425	0.286592	-0.311514	0.211884	0.377767	0.167711	0.279226	0.846969	0.0431227	0.646833	0.276193	0.427947	-1.01093	0.327114
-4.70704	-0.340438	0.0193875	1.06695	0.501846	0.605211	-0.814265	-0.122204	0.554465	-0.263345	0.286457	-0.310857	0.211343	0.378466	0.168004	0.279415	0.847229	0.0432334	0.6471	0.276562	0.427908	-1.01089	0.327297
-4.70656	-0.341469	0.019129	1.06752	0.503274	0.605753	-0.813968	-0.121896	0.554437	-0.263167	0.286349	-0.309839	0.211729	0.378641	0.168581	0.279135	0.847683	0.043625	0.648045	0.276604	0.427771	-1.01129	0.327284
-4.70608	-0.343692	0.019806	1.06795	0.503706	0.606527	-0.815084	-0.122024	0.554388	-0.26312	0.286627	-0.308709	0.21205	0.378966	0.168517	0.278804	0.848371	0.0440777	0.648227	0.276787	0.427539	-1.01047	0.327391
-4.7056	-0.345838	0.0203206	1.06824	0.503399	0.606794	-0.815224	-0.121648	0.55467	-0.26307	0.287261	-0.308603	0.212341	0.378625	0.169048	0.278388	0.847951	0.0441138	0.648814	0.276827	0.427668	-1.01024	0.327283
-4.70512	-0.346833	0.0202984	1.06833	0.502175	0.60709	-0.815041	-0.121319	0.554758	-0.263114	0.28749	-0.30779	0.212269	0.379043	0.169547	0.277747	0.847414	0.0444494	0.649116	0.276777	0.427723	-1.0103	0.327183
-4.70464	-0.347721	0.0206884	1.06842	0.501439	0.608075	-0.815938	-0.121119	0.55476	-0.263972	0.287495	-0.307292	0.21238	0.379545	0.169186	0.277803	0.847657	0.0448305	0.64934	0.276749	0.427517	-1.0103	0.327321
-4.70416	-0.348149	0.0209044	1.06859	0.501386	0.608588	-0.816359	-0.120992	0.554795	-0.264488	0.287605	-0.306557	0.212143	0.379225	0.169548	0.277852	0.847188	0.0451947	0.649803	0.277083	0.427482	-1.0106	0.327527
-4.70368	-0.349145	0.0211824	1.06873	0.501171	0.609195	-0.817056	-0.121272	0.554667	-0.264644	0.287614	-0.305183	0.212084	0.379829	0.169411	0.277502	0.847234	0.0454644	0.650035	0.277134	0.427249	-1.01038	0.328047
-4.7032	-0.351477	0.0216378	1.06848	0.501567	0.609954	-0.815981	-0.121822	0.554642	-0.264377	0.288186	-0.303949	0.212417	0.379929	0.169606	0.277239	0.846837	0.0456155	0.650482	0.277253	0.427025	-1.01051	0.328137
-4.70272	-0.352223	0.0222314	1.06922	0.502135	0.611044	-0.815529	-0.12199	0.554374	-0.263842	0.288284	-0.30286	0.212449	0.379485	0.16972	0.277336	0.846113	0.0459134	0.651233	0.277084	0.427258	-1.01076	0.328591
-4.70224	-0.353337	0.0228959	1.06974	0.501428	0.61173	-0.816524	-0.12236	0.554044	-0.263298	0.28904	-0.302348	0.213158	0.379469	0.169498	0.276625	0.846049	0.0460281	0.651554	0.277164	0.42735	-1.01076	0.32892
-4.70176	-0.353995	0.0234277	1.06987	0.501995	0.611675	-0.816813	-0.123419	0.554106	-0.263296	0.289666	-0.301371	0.213632	0.379089	0.169655	0.276143	0.846071	0.0462852	0.651853	0.277523	0.427187	-1.01099	0.329384
-4.70128	-0.354275	0.02339	1.07066	0.503073	0.612066	-0.817324	-0.12356	0.554146	-0.262531	0.288804	-0.299725	0.213033	0.379197	0.169637	0.275966	0.84593	0.0463819	0.652497	0.277644	0.427205	-1.01094	0.330137
-4.7008	-0.355315	0.0228662	1.07048	0.502969	0.612387	-0.817463	-0.124128	0.554078	-0.262033	0.289402	-0.298665	0.212693	0.378953	0.169589	0.275265	0.846766	0.0467184	0.652999	0.27767	0.427261	-1.01109	0.33025
-4.70032	-0.356965	0.0227309	1.07	0.503334	0.612501	-0.818583	-0.124476	0.553917	-0.261745	0.290098	-0.298291	0.212991	0.378709	0.169121	0.275011	0.846707	0.0471241	0.653373	0.278171	0.427042	-1.01104	0.330343
-4.69984	-0.357387	0.0228844	1.07006	0.504868	0.613103	-0.817983	-0.124518	0.553699	-0.261447	0.290275	-0.297746	0.213524	0.378412	0.169115	0.275342	0.846728	0.0472334	0.653714	0.278565	0.426989	-1.0112	0.330302
-4.69936	-0.357938	0.0228752	1.07113	0.504184	0.613505	-0.8187	-0.124913	0.553682	-0.260413	0.290265	-0.296902	0.213872	0.378432	0.169217	0.275443	0.846203	0.047442	0.654074	0.278955	0.427336	-1.01171	0.330613
-4.69888	-0.358794	0.0230504	1.07106	0.503515	0.614063	-0.818492	-0.124901	0.553768	-0.260172	0.289629	-0.296042	0.213664	0.378357	0.169369	0.275271	0.845934	0.0474237	0.654815	0.279032	0.42757	-1.01175	0.330636
-4.6984	-0.359359	0.022782	1.07169	0.504149	0.614452	-0.818059	-0.125817	0.553764	-0.26021	0.289775	-0.294573	0.213897	0.378512	0.169263	0.275287	0.84664	0.0477574	0.655135	0.278666	0.427474	-1.01209	0.330957
-4.69792	-0.360777	0.022933	1.07314	0.504277	0.614703	-0.817644	-0.125811	0.553677	-0.26061	0.289365	-0.293297	0.213833	0.378584	0.169195	0.275372	0.847138	0.0480684	0.655612	0.278813	0.427023	-1.01196	0.33106
-4.69744	-0.361666	0.0228011	1.07403	0.503663	0.615541	-0.818364	-0.126459	0.55374	-0.260369	0.289266	-0.292207	0.213586	0.378424	0.1692	0.275129	0.847164	0.0481402	0.655847	0.278752	0.427067	-1.01245	0.331617
-4.69696	-0.362501	0.0228829	1.0742	0.503518	0.615921	-0.818522	-0.126043	0.553647	-0.260023	0.289377	-0.29163	0.213579	0.378613	0.1685	0.274082	0.847599	0.0480713	0.656228	0.278922	0.426992	-1.01289	0.331614
-4.69648	-0.364007	0.0226692	1.07485	0.502892	0.615991	-0.81851	-0.125947	0.553457	-0.259166	0.289147	-0.290409	0.21329	0.378559	0.168565	0.273365	0.84817	0.0481227	0.656662	0.278957	0.42667	-1.01296	0.33169
-4.696	-0.365506	0.0226849	1.07566	0.502201	0.61679	-0.818743	-0.125272	0.553191	-0.258799	0.289213	-0.289539	0.212938	0.378334	0.168822	0.273539	0.848489	0.04833	0.656834	0.279007	0.426578	-1.01322	0.331505
-4.69552	-0.366234	0.0228638	1.07713	0.501827	0.617101	-0.819115	-0.125613	0.553295	-0.258222	0.289527	-0.28982	0.212773	0.378206	0.168384	0.274079	0.848601	0.0485623	0.657313	0.279126	0.42642	-1.01335	0.331993
-4.69504	-0.367921	0.0228898	1.07735	0.50135	0.617846	-0.818517	-0.125733	0.553296	-0.257832	0.289439	-0.288807	0.212553	0.378095	0.168481	0.274006	0.848792	0.0488665	0.657941	0.278983	0.426233	-1.01336	0.331849
-4.69456	-0.36901	0.0230039	1.07832	0.500737	0.618455	-0.817932	-0.125649	0.553431	-0.256961	0.289537	-0.288992	0.212011	0.378229	0.168819	0.273867	0.849039	0.0491129	0.658335	0.278938	0.426151	-1.01343	0.331926
-4.69408	-0.370453	0.0232177	1.07862	0.500494	0.6192	-0.818099	-0.125657	0.553471	-0.256826	0.289259	-0.288765	0.212455	0.378388	0.169014	0.27358	0.849086	0.0491676	0.658596	0.279194	0.426183	-1.01392	0.331688
-4.6936	-0.371104	0.0231043	1.07923	0.500371	0.620089	-0.818107	-0.125706	0.553468	-0.256218	0.289166	-0.288686	0.212245	0.378149	0.168708	0.274006	0.849028	0.0495091	0.659176	0.278933	0.426285	-1.01375	0.331846
-4.69312	-0.372479	0.023667	1.08019	0.499404	0.620735	-0.81833	-0.126179	0.553406	-0.255407	0.289445	-0.287265	0.212038	0.378477	0.168893	0.274542	0.848956	0.0498225	0.659696	0.279075	0.426603	-1.01367	0.331669
-4.69264	-0.373254	0.0238271	1.08091	0.49904	0.6212	-0.817914	-0.126022	0.553481	-0.255051	0.289439	-0.286868	0.211266	0.378463	0.169204	0.274323	0.848456	0.0498048	0.660338	0.279298	0.426415	-1.01351	0.331711
-4.69216	-0.374307	0.0241834	1.08112	0.498905	0.621922	-0.816944	-0.126038	0.553473	-0.255657	0.289484	-0.285143	0.210745	0.378547	0.169627	0.274064	0.847944	0.0502758	0.660749	0.279215	0.427005	-1.0137	0.331693
-4.69168	-0.374712	0.0241131	1.08203	0.497971	0.622451	-0.814931	-0.126281	0.553267	-0.255237	0.289687	-0.284173	0.209995	0.379121	0.169383	0.273989	0.847614	0.0506401	0.660904	0.279373	0.4275	-1.01394	0.331602
-4.6912	-0.376101	0.0242494	1.08189	0.497588	0.623449	-0.815309	-0.126043	0.553241	-0.25475	0.289766	-0.284422	0.209631	0.379045	0.169314	0.274259	0.847037	0.0508104	0.661087	0.279332	0.427672	-1.01416	0.331087
-4.69072	-0.37718	0.0243721	1.08305	0.497717	0.623921	-0.814529	-0.125912	0.553126	-0.253533	0.289624	-0.28482	0.209146	0.379169	0.168913	0.274047	0.846869	0.0506877	0.661612	0.279478	0.427438	-1.01353	0.330555
-4.69024	-0.378161	0.024251	1.08318	0.496861	0.624308	-0.813859	-0.126108	0.552988	-0.253233	0.289749	-0.283312	0.208682	0.379104	0.169048	0.273937	0.846331	0.0509628	0.662357	0.27952	0.427706	-1.01317	0.330531
-4.68976	-0.378557	0.0242275	1.08465	0.49647	0.62476	-0.814531	-0.12658	0.552855	-0.252683	0.290351	-0.282467	0.207895	0.379226	0.169454	0.273834	0.846576	0.0512882	0.662794	0.279611	0.428028	-1.01216	0.33029
-4.68928	-0.378918	0.02435	1.08633	0.495958	0.625148	-0.814754	-0.126703	0.552841	-0.253141	0.290663	-0.280321	0.208	0.378918	0.169528	0.274413	0.84604	0.0513289	0.663246	0.279777	0.428207	-1.01199	0.330255
-4.6888	-0.379047	0.0242283	1.08695	0.495255	0.625501	-0.814402	-0.126758	0.552705	-0.251867	0.291034	-0.280188	0.207608	0.378927	0.170644	0.274462	0.845602	0.051311	0.663283	0.279916	0.428251	-1.01183	0.329813
-4.68832	-0.378946	0.0243469	1.08697	0.494727	0.626291	-0.81369	-0.127104	0.552578	-0.252256	0.291026	-0.280019	0.20771	0.378917	0.170891	0.274136	0.845273	0.0512772	0.663706	0.280141	0.428239	-1.0111	0.329564
-4.68784	-0.37901	0.0246815	1.08758	0.494106	0.626791	-0.813463	-0.127508	0.552474	-0.252135	0.291049	-0.279742	0.207877	0.379049	0.170814	0.274016	0.844627	0.0510988	0.664281	0.28034	0.428555	-1.01069	0.329587
-4.68736	-0.379029	0.024868	1.0877	0.494563	0.627509	-0.812969	-0.127059	0.552455	-0.252157	0.290852	-0.278079	0.207805	0.379123	0.17091	0.273896	0.844442	0.0512087	0.664872	0.279988	0.428889	-1.01028	0.329578
-4.68688	-0.37982	0.0253263	1.08799	0.494459	0.627724	-0.812563	-0.127057	0.55229	-0.252481	0.291171	-0.277967	0.207258	0.379232	0.171185	0.273831	0.843552	0.0511574	0.665026	0.280052	0.428973	-1.00978	0.329585
-4.6864	-0.380201	0.0248192	1.08882	0.493069	0.62805	-0.812229	-0.127343	0.552304	-0.253583	0.292165	-0.27809	0.207608	0.379248	0.17143	0.273597	0.84352	0.0510543	0.665531	0.280558	0.42979	-1.00935	0.329373
-4.68592	-0.379966	0.0251005	1.08947	0.492497	0.628783	-0.811659	-0.127098	0.552403	-0.253322	0.292466	-0.277806	0.207618	0.379103	0.171416	0.273698	0.843641	0.0510535	0.665634	0.280816	0.430313	-1.00904	0.329315
-4.68544	-0.379926	0.0252539	1.09038	0.49146	0.629052	-0.810859	-0.127552	0.552285	-0.251889	0.292819	-0.277684	0.207759	0.379115	0.172036	0.273142	0.842781	0.0509857	0.665947	0.281425	0.430416	-1.00898	0.329264
-4.68496	-0.380463	0.0257927	1.09022	0.49119	0.62932	-0.81023	-0.128152	0.552355	-0.251849	0.292956	-0.277311	0.207104	0.379401	0.171908	0.272429	0.842383	0.051318	0.665976	0.28137	0.430896	-1.00879	0.328733
-4.68448	-0.380807	0.0249477	1.09132	0.491047	0.629587	-0.811677	-0.128338	0.552238	-0.251271	0.292875	-0.277147	0.207006	0.379513	0.172686	0.272166	0.841722	0.0512363	0.665793	0.281457	0.430819	-1.00875	0.32812
-4.684	-0.380644	0.0251019	1.09223	0.491574	0.629669	-0.811772	-0.128419	0.552398	-0.250805	0.293246	-0.277526	0.207239	0.379332	0.172551	0.271844	0.840772	0.0510055	0.665917	0.281563	0.43123	-1.00863	0.32817
-4.68352	-0.380188	0.0248893	1.09262	0.490259	0.630043	-0.810318	-0.12854	0.552409	-0.250929	0.29335	-0.276559	0.207609	0.379311	0.172453	0.271528	0.840426	0.050997	0.666034	0.281558	0.431462	-1.00829	0.328199
-4.68304	-0.380493	0.0246882	1.0934	0.489774	0.63001	-0.809921	-0.12822	0.55217	-0.25063	0.294296	-0.276079	0.207829	0.379565	0.172322	0.271877	0.839971	0.0509977	0.666133	0.281638	0.431897	-1.0079	0.328473
-4.68256	-0.380747	0.0247565	1.09398	0.488926	0.630753	-0.809282	-0.128644	0.552122	-0.249672	0.294893	-0.274222	0.208016	0.379351	0.172358	0.271889	0.840254	0.0511692	0.666612	0.28187	0.432223	-1.00772	0.328625
-4.68208	-0.380795	0.0248559	1.09456	0.488343	0.631166	-0.80819	-0.128896	0.552121	-0.249085	0.295756	-0.273775	0.207525	0.379417	0.17213	0.272173	0.839616	0.0512329	0.666952	0.282054	0.432495	-1.00819	0.328228
-4.6816	-0.380626	0.0247498	1.09505	0.487291	0.631262	-0.808178	-0.129058	0.552067	-0.248585	0.296456	-0.272114	0.207124	0.379049	0.172717	0.272136	0.840177	0.0511404	0.667131	0.282097	0.432798	-1.00832	0.328331
-4.68112	-0.381113	0.0242008	1.09612	0.486323	0.631428	-0.807395	-0.128933	0.551994	-0.248412	0.296206	-0.271062	0.206785	0.37896	0.172838	0.272234	0.839909	0.0512865	0.667459	0.282107	0.433298	-1.00816	0.327844
-4.68064	-0.381241	0.0241549	1.09665	0.485479	0.631972	-0.806886	-0.129233	0.552151	-0.248171	0.297219	-0.271086	0.206321	0.37861	0.173175	0.271715	0.839291	0.051335	0.667906	0.282202	0.433493	-1.00771	0.327925
-4.68016	-0.381167	0.0240227	1.09739	0.485019	0.632039	-0.807174	-0.128761	0.552059	-0.247569	0.297593	-0.270482	0.205677	0.378746	0.173591	0.271842	0.838723	0.0513551	0.66784	0.282449	0.433544	-1.00801	0.328092
-4.67968	-0.381764	0.0238448	1.09774	0.484445	0.633031	-0.806955	-0.127853	0.552125	-0.246393	0.298368	-0.270394	0.205373	0.378356	0.173571	0.272408	0.838986	0.0514182	0.668734	0.282815	0.433694	-1.00809	0.327841
-4.6792	-0.381465	0.0238351	1.09751	0.484426	0.634347	-0.808088	-0.127525	0.552209	-0.246093	0.298748	-0.269337	0.204287	0.378228	0.173586	0.272479	0.838824	0.0513257	0.668858	0.283181	0.433645	-1.00861	0.327647
-4.67872	-0.381834	0.0231816	1.09771	0.483338	0.634085	-0.808817	-0.126688	0.552056	-0.246515	0.298914	-0.268458	0.203288	0.377715	0.173407	0.272018	0.838332	0.0515513	0.668917	0.283256	0.433878	-1.00908	0.327826
-4.67824	-0.381939	0.0229017	1.09877	0.482977	0.634848	-0.809259	-0.126715	0.552095	-0.246252	0.299794	-0.267745	0.203389	0.377558	0.173478	0.272457	0.837855	0.051789	0.668887	0.283239	0.433684	-1.00881	0.328141
-4.67776	-0.381496	0.0230472	1.09983	0.481677	0.635848	-0.808973	-0.126121	0.552109	-0.246614	0.300643	-0.266311	0.203214	0.377579	0.174056	0.272007	0.837545	0.0520222	0.669231	0.283563	0.43391	-1.00873	0.327833
-4.67728	-0.381396	0.0228245	1.09987	0.48175	0.636468	-0.809399	-0.125709	0.552079	-0.247155	0.301055	-0.265312	0.202323	0.377504	0.174449	0.27228	0.838129	0.0518821	0.669304	0.283808	0.434066	-1.00849	0.327976
-4.6768	-0.38097	0.0225626	1.09985	0.48086	0.636707	-0.809763	-0.125409	0.552141	-0.247343	0.301207	-0.264179	0.201929	0.377214	0.174262	0.272508	0.837715	0.0519209	0.669964	0.284031	0.433934	-1.00864	0.327906
-4.67632	-0.381382	0.0227852	1.09985	0.480735	0.637176	-0.811034	-0.125436	0.55217	-0.247179	0.301817	-0.263693	0.201212	0.376856	0.17378	0.271403	0.837141	0.0520785	0.669993	0.284326	0.434337	-1.00866	0.327949
-4.67584	-0.381311	0.0228151	1.09927	0.479363	0.63759	-0.81159	-0.124677	0.552256	-0.24697	0.302477	-0.263679	0.200659	0.376515	0.173924	0.271479	0.836447	0.0522729	0.669998	0.284614	0.434344	-1.00914	0.327691
-4.67536	-0.381388	0.022748	1.09939	0.478502	0.637504	-0.812246	-0.125244	0.552265	-0.247254	0.303124	-0.262432	0.19932	0.376284	0.174446	0.271016	0.836546	0.0522406	0.67016	0.284705	0.4345	-1.00881	0.327819
-4.67488	-0.38245	0.0226035	1.0996	0.478138	0.637303	-0.811713	-0.124526	0.552375	-0.247704	0.303916	-0.261481	0.19889	0.376214	0.17436	0.270757	0.836166	0.0520952	0.670665	0.284664	0.435082	-1.00876	0.327735
-4.6744	-0.383276	0.0221717	1.10022	0.47786	0.638104	-0.812099	-0.124989	0.552367	-0.247207	0.304807	-0.260736	0.197938	0.375981	0.17457	0.270211	0.835422	0.0519778	0.670701	0.2847	0.43503	-1.00862	0.327542
-4.67392	-0.384761	0.0223274	1.10112	0.477954	0.63831	-0.811827	-0.124497	0.552633	-0.246615	0.305515	-0.260481	0.197704	0.375769	0.174869	0.269922	0.835777	0.0519934	0.670932	0.284816	0.435193	-1.00861	0.327508
-4.67344	-0.384728	0.0224968	1.10143	0.47802	0.638774	-0.812736	-0.12454	0.552799	-0.246311	0.306435	-0.260334	0.19758	0.375178	0.174814	0.270318	0.834738	0.0521726	0.670976	0.284872	0.435404	-1.00792	0.327703
-4.67296	-0.386043	0.0223347	1.10226	0.476488	0.639183	-0.813019	-0.124456	0.552938	-0.245887	0.307185	-0.259923	0.197691	0.374938	0.175292	0.269823	0.834498	0.0522265	0.671772	0.284936	0.435503	-1.00839	0.327464
-4.67248	-0.386343	0.0222406	1.10316	0.475271	0.639039	-0.811174	-0.124132	0.553256	-0.24553	0.307912	-0.25927	0.197657	0.37451	0.17559	0.269583	0.833479	0.0520837	0.671607	0.285046	0.435719	-1.00895	0.327327
-4.672	-0.38593	0.0218475	1.10372	0.475005	0.63998	-0.811779	-0.123986	0.55339	-0.244242	0.309086	-0.259882	0.19744	0.374331	0.175951	0.269476	0.833233	0.052292	0.671974	0.284954	0.436054	-1.00849	0.327564
-4.67152	-0.386007	0.0220297	1.1042	0.473835	0.640615	-0.812907	-0.123444	0.553218	-0.243619	0.310357	-0.259663	0.197202	0.373769	0.176303	0.269331	0.832584	0.0521458	0.671995	0.285155	0.436077	-1.00898	0.32767
-4.67104	-0.386215	0.0209325	1.10397	0.47352	0.64086	-0.812655	-0.123689	0.553329	-0.24298	0.310801	-0.259562	0.197067	0.373899	0.176719	0.26937	0.832806	0.0520808	0.671922	0.284999	0.436474	-1.00964	0.327795
-4.67056	-0.386536	0.0212266	1.10452	0.472993	0.641126	-0.81297	-0.12395	0.553482	-0.242265	0.311724	-0.259552	0.196913	0.373478	0.177147	0.269371	0.833347	0.0521833	0.67211	0.284917	0.436841	-1.01026	0.327736
-4.67008	-0.386889	0.0211273	1.10517	0.473366	0.642098	-0.812355	-0.123844	0.553657	-0.242089	0.311988	-0.259293	0.196069	0.372741	0.177661	0.268489	0.83289	0.052483	0.672084	0.284903	0.437325	-1.01045	0.327834
-4.6696	-0.387661	0.0213709	1.10591	0.472865	0.642393	-0.812083	-0.123565	0.55387	-0.241543	0.312841	-0.259444	0.195876	0.371983	0.177937	0.268578	0.83245	0.0526917	0.672176	0.284783	0.43761	-1.01075	0.328375
-4.66912	-0.388018	0.0210833	1.10631	0.474063	0.64356	-0.811725	-0.123222	0.554026	-0.241469	0.313554	-0.258325	0.195246	0.371557	0.177917	0.268365	0.831571	0.0527797	0.672077	0.284699	0.437478	-1.01093	0.328028
-4.66864	-0.389222	0.0205906	1.10699	0.47368	0.643126	-0.812164	-0.122961	0.554304	-0.241649	0.314045	-0.258044	0.194485	0.371496	0.178114	0.268052	0.830985	0.0530549	0.672158	0.284474	0.437724	-1.01069	0.328038
-4.66816	-0.389753	0.0210974	1.10721	0.473082	0.643435	-0.812812	-0.122948	0.554579	-0.241329	0.314621	-0.257348	0.193243	0.371237	0.178362	0.26733	0.830835	0.0531282	0.672264	0.284146	0.437985	-1.0104	0.328083
-4.66768	-0.390216	0.0209573	1.10787	0.472966	0.643689	-0.811838	-0.122329	0.554684	-0.242207	0.315454	-0.257376	0.192819	0.370551	0.178809	0.266972	0.831038	0.0532067	0.672394	0.284203	0.438263	-1.0104	0.328062
-4.6672	-0.390963	0.0208628	1.10875	0.471751	0.643915	-0.811442	-0.122151	0.554868	-0.241891	0.316135	-0.256659	0.192503	0.369971	0.179176	0.266149	0.831145	0.0532859	0.672441	0.284405	0.438878	-1.01049	0.327808
-4.66672	-0.391776	0.0207981	1.10959	0.471445	0.643817	-0.811191	-0.121983	0.555075	-0.241644	0.316644	-0.255879	0.192162	0.369732	0.179151	0.266025	0.831053	0.0531732	0.672735	0.284503	0.439287	-1.01063	0.328147
-4.66624	-0.392437	0.0205401	1.11035	0.470648	0.644297	-0.811239	-0.122015	0.554896	-0.241128	0.31673	-0.255248	0.19242	0.36966	0.179673	0.265454	0.830708	0.0530298	0.672861	0.284486	0.439377	-1.01062	0.328097
-4.66576	-0.392918	0.0211347	1.11076	0.470355	0.64498	-0.811363	-0.121486	0.554815	-0.241645	0.31743	-0.254022	0.192261	0.369594	0.180188	0.265416	0.830674	0.0531056	0.67284	0.284538	0.439646	-1.01086	0.328106
-4.66528	-0.393197	0.0214776	1.11036	0.469078	0.645445	-0.811807	-0.121234	0.555083	-0.24241	0.3184	-0.252389	0.191926	0.369577	0.180408	0.265022	0.830356	0.0537044	0.673615	0.284516	0.439718	-1.01141	0.327833
-4.6648	-0.394339	0.0215983	1.1118	0.469245	0.646085	-0.812204	-0.120917	0.555265	-0.242456	0.31882	-0.252513	0.192352	0.369797	0.180717	0.264749	0.829944	0.0536658	0.673945	0.284414	0.439763	-1.01205	0.327612
-4.66432	-0.395181	0.0222246	1.11181	0.46877	0.646206	-0.812543	-0.120872	0.555329	-0.241954	0.31931	-0.251536	0.192522	0.369836	0.18097	0.264288	0.829528	0.0536449	0.674114	0.284253	0.440287	-1.01234	0.327743
-4.66384	-0.39494	0.021943	1.11207	0.467697	0.645761	-0.812796	-0.120425	0.555126	-0.241792	0.319753	-0.251328	0.192133	0.369555	0.181108	0.264101	0.829566	0.0538607	0.673816	0.28387	0.440564	-1.01296	0.327425
-4.66336	-0.394797	0.0218344	1.11241	0.467499	0.645745	-0.814147	-0.120239	0.555042	-0.241312	0.320686	-0.250339	0.191727	0.369196	0.181444	0.263541	0.828595	0.0541902	0.673966	0.284118	0.44074	-1.0128	0.327602
-4.66288	-0.393373	0.0218886	1.11318	0.466304	0.645423	-0.815458	-0.120193	0.554861	-0.241076	0.320893	-0.249332	0.191317	0.368878	0.181693	0.263353	0.828942	0.0543281	0.674446	0.283949	0.440897	-1.01306	0.327549
-4.6624	-0.392731	0.0218697	1.11383	0.466904	0.645722	-0.815989	-0.120708	0.555132	-0.240582	0.321516	-0.248116	0.191936	0.368776	0.18177	0.263705	0.827827	0.0546226	0.674833	0.283917	0.441047	-1.01293	0.327861
-4.66192	-0.391775	0.0219128	1.11414	0.46648	0.645964	-0.8167	-0.120507	0.555267	-0.240719	0.322244	-0.246379	0.192371	0.368513	0.182286	0.263145	0.828541	0.0545549	0.674818	0.283923	0.441027	-1.01243	0.328488
-4.66144	-0.391584	0.0219316	1.11465	0.466389	0.646248	-0.817364	-0.121026	0.555535	-0.24057	0.322953	-0.246123	0.19246	0.368503	0.182712	0.262868	0.827354	0.0548717	0.674806	0.284132	0.441216	-1.01215	0.328575
-4.66096	-0.391938	0.021664	1.1149	0.466066	0.646787	-0.817307	-0.120822	0.555523	-0.239893	0.323622	-0.245147	0.192038	0.368385	0.18272	0.262571	0.827645	0.0548699	0.674784	0.283979	0.441093	-1.01221	0.32877
-4.66048	-0.391358	0.0216186	1.11482	0.465822	0.64694	-0.816931	-0.120441	0.555799	-0.239216	0.32372	-0.244185	0.191912	0.368268	0.182882	0.262862	0.827547	0.0550637	0.67475	0.283731	0.441117	-1.01238	0.328837
-4.66	-0.39174	0.0216306	1.11503	0.466074	0.647216	-0.816513	-0.12025	0.555936	-0.238627	0.324649	-0.243161	0.191584	0.368186	0.183502	0.262367	0.827256	0.0552049	0.674885	0.283886	0.440874	-1.01265	0.3293
-4.65952	-0.392091	0.0214	1.11483	0.465635	0.647912	-0.817235	-0.120337	0.555972	-0.237787	0.325624	-0.243074	0.191794	0.368172	0.18361	0.262293	0.827165	0.055488	0.675277	0.284012	0.440764	-1.01257	0.329272
-4.65904	-0.391002	0.021335	1.11474	0.465524	0.64891	-0.817524	-0.120005	0.556178	-0.237759	0.326352	-0.24223	0.191871	0.367782	0.183751	0.262452	0.827212	0.0555822	0.675186	0.284008	0.440908	-1.0123	0.32971
-4.65856	-0.391036	0.02159	1.11508	0.466118	0.649805	-0.817665	-0.119562	0.556433	-0.237625	0.326664	-0.241115	0.19224	0.367681	0.184192	0.262779	0.826837	0.0554589	0.67525	0.284054	0.441411	-1.01241	0.329956
-4.65808	-0.39124	0.0219306	1.11515	0.466496	0.650245	-0.818445	-0.119256	0.556428	-0.236985	0.326678	-0.239753	0.192682	0.367621	0.184512	0.26266	0.826082	0.055416	0.675604	0.284134	0.44177	-1.01299	0.329786
-4.6576	-0.391727	0.021794	1.1156	0.465336	0.65109	-0.818003	-0.119579	0.556326	-0.236823	0.327439	-0.239248	0.192302	0.367545	0.184706	0.262205	0.825657	0.0554772	0.675466	0.284044	0.441788	-1.01288	0.329781
-4.65712	-0.392075	0.0216838	1.11687	0.465335	0.651316	-0.81917	-0.119692	0.556493	-0.236405	0.327933	-0.238414	0.192307	0.367229	0.184804	0.262474	0.825982	0.055618	0.675579	0.283653	0.441925	-1.01308	0.330226
-4.65664	-0.392162	0.0214507	1.11726	0.465179	0.652158	-0.819596	-0.120001	0.556681	-0.236802	0.328213	-0.237036	0.192176	0.367447	0.185059	0.262681	0.825666	0.0555625	0.675923	0.283447	0.442034	-1.01248	0.33032
-4.65616	-0.393817	0.021925	1.11693	0.464251	0.653056	-0.819253	-0.120373	0.556874	-0.236111	0.328869	-0.235788	0.192185	0.367463	0.18567	0.261977	0.825653	0.0553296	0.67631	0.283388	0.442045	-1.01242	0.330427
-4.65568	-0.394343	0.0218411	1.11687	0.464164	0.653742	-0.819204	-0.120121	0.55699	-0.236005	0.329226	-0.234022	0.192078	0.367038	0.185839	0.262161	0.824802	0.0554307	0.676483	0.283143	0.44189	-1.01176	0.330783
-4.6552	-0.394512	0.0222229	1.11668	0.463437	0.654045	-0.818892	-0.119887	0.557046	-0.235711	0.329886	-0.232895	0.191886	0.367277	0.18641	0.262006	0.824271	0.0553956	0.67701	0.282698	0.441821	-1.01124	0.331255
-4.65472	-0.395778	0.022715	1.11693	0.462643	0.654514	-0.818893	-0.120122	0.557332	-0.235542	0.33052	-0.231848	0.191775	0.367629	0.187016	0.262179	0.823878	0.0551541	0.677467	0.28258	0.441957	-1.01117	0.331327
-4.65424	-0.396772	0.0229714	1.11654	0.462986	0.654261	-0.818386	-0.120791	0.557438	-0.235664	0.331474	-0.231288	0.19265	0.367645	0.187351	0.262609	0.823675	0.0549426	0.677371	0.28245	0.441615	-1.01047	0.33157
-4.65376	-0.397294	0.0235203	1.11629	0.461825	0.654239	-0.818297	-0.120621	0.557773	-0.235465	0.331898	-0.230145	0.192881	0.367427	0.18805	0.26303	0.823325	0.0550374	0.677841	0.282292	0.441998	-1.01006	0.332137
-4.65328	-0.398277	0.0229701	1.11569	0.461711	0.654197	-0.819052	-0.120345	0.557973	-0.235605	0.33189	-0.229192	0.192805	0.367386	0.188221	0.26333	0.822714	0.0549729	0.677689	0.282058	0.442002	-1.01045	0.332075
-4.6528	-0.398929	0.0229371	1.11524	0.462029	0.654829	-0.818935	-0.120376	0.558334	-0.235125	0.332373	-0.229493	0.193444	0.367597	0.188231	0.263463	0.821868	0.0546887	0.678029	0.281682	0.442385	-1.01019	0.332275
-4.65232	-0.399518	0.0228763	1.11584	0.461807	0.654974	-0.819655	-0.120906	0.558438	-0.233864	0.332328	-0.229008	0.193415	0.367567	0.188445	0.26366	0.821321	0.0544176	0.678291	0.281503	0.44237	-1.00983	0.332798
-4.65184	-0.399823	0.0226302	1.11571	0.461166	0.655342	-0.820174	-0.120787	0.558805	-0.232995	0.332835	-0.228424	0.192781	0.367777	0.188666	0.263752	0.820854	0.0539447	0.678652	0.281507	0.442604	-1.00985	0.332831
-4.65136	-0.400196	0.0220318	1.11647	0.460729	0.655793	-0.819688	-0.120327	0.559057	-0.232708	0.333109	-0.229215	0.19316	0.368494	0.189156	0.264644	0.820683	0.0537759	0.67917	0.281446	0.442257	-1.00944	0.333206
-4.65088	-0.401521	0.0218837	1.1164	0.459174	0.656199	-0.819146	-0.120018	0.559274	-0.231847	0.333558	-0.229011	0.193306	0.368989	0.189427	0.264887	0.819786	0.0536812	0.679515	0.281656	0.442565	-1.00925	0.333008
-4.6504	-0.402921	0.0214725	1.11698	0.45832	0.657233	-0.81907	-0.119991	0.559593	-0.231537	0.333628	-0.228534	0.19288	0.369148	0.189848	0.265947	0.819836	0.0534602	0.680065	0.281642	0.442766	-1.00916	0.332984
-4.64992	-0.40423	0.0212575	1.11633	0.457279	0.657669	-0.819777	-0.119846	0.559872	-0.231535	0.33425	-0.228072	0.193027	0.369454	0.190604	0.266087	0.819823	0.0531042	0.679843	0.281429	0.44254	-1.00941	0.33312
-4.64944	-0.40541	0.0211823	1.11638	0.456648	0.658382	-0.82021	-0.119103	0.560074	-0.230482	0.334574	-0.227308	0.192726	0.369773	0.190763	0.266729	0.819547	0.052937	0.679925	0.281597	0.442413	-1.00919	0.333386
-4.64896	-0.406858	0.0204881	1.11591	0.455846	0.659344	-0.82083	-0.118578	0.560472	-0.229918	0.335264	-0.227158	0.192611	0.370097	0.190812	0.26715	0.819566	0.0529832	0.68011	0.281119	0.442467	-1.00884	0.33344
-4.64848	-0.407604	0.0203313	1.11571	0.455294	0.659771	-0.821121	-0.117586	0.560707	-0.230182	0.335589	-0.227051	0.191747	0.37001	0.19065	0.267082	0.818581	0.0529848	0.680074	0.281256	0.442286	-1.00911	0.333762
-4.648	-0.408561	0.0197211	1.11537	0.454128	0.660568	-0.820831	-0.116844	0.560831	-0.229917	0.335867	-0.226808	0.191843	0.370243	0.190606	0.267443	0.818206	0.0528256	0.68031	0.281313	0.442254	-1.00903	0.334107
-4.64752	-0.409211	0.0195388	1.11413	0.454052	0.661393	-0.820457	-0.115928	0.560843	-0.229895	0.337143	-0.226728	0.19198	0.370331	0.19023	0.268119	0.817678	0.0528465	0.680493	0.281131	0.442476	-1.00862	0.334119
-4.64704	-0.409829	0.0189989	1.11452	0.453894	0.661857	-0.819796	-0.115641	0.561035	-0.229258	0.337182	-0.226853	0.191817	0.369986	0.19006	0.268557	0.817573	0.0526938	0.680975	0.280969	0.442282	-1.0096	0.334271
-4.64656	-0.411895	0.018744	1.11398	0.453857	0.662457	-0.819804	-0.114971	0.561101	-0.228672	0.337487	-0.226181	0.1918	0.370118	0.189712	0.268686	0.816641	0.0527346	0.681063	0.280812	0.442109	-1.00933	0.334767
-4.64608	-0.413675	0.0182057	1.11424	0.453422	0.66338	-0.819764	-0.114795	0.561168	-0.228462	0.337891	-0.226022	0.192002	0.37026	0.189402	0.270029	0.816353	0.0528664	0.681257	0.280743	0.44212	-1.00906	0.335002
-4.6456	-0.414194	0.0179788	1.11438	0.45362	0.664358	-0.82025	-0.114344	0.561324	-0.228459	0.338118	-0.225548	0.192273	0.370385	0.188974	0.27091	0.815915	0.0530272	0.68157	0.280608	0.441851	-1.00938	0.335187
-4.64512	-0.416578	0.0179606	1.11342	0.452915	0.664408	-0.822195	-0.114308	0.561258	-0.228286	0.338772	-0.22454	0.192798	0.370506	0.188787	0.271082	0.815928	0.0529359	0.681748	0.280693	0.442067	-1.00907	0.335317
-4.64464	-0.417316	0.0181943	1.11264	0.453068	0.664711	-0.821779	-0.114575	0.561351	-0.228009	0.339369	-0.22464	0.192572	0.370827	0.188136	0.271819	0.815702	0.0529003	0.68202	0.280597	0.441828	-1.009	0.335577
-4.64416	-0.41779	0.0179825	1.11317	0.45301	0.665266	-0.821776	-0.114271	0.56133	-0.227304	0.339994	-0.224331	0.192011	0.370797	0.187622	0.271833	0.815221	0.0529968	0.682568	0.28035	0.44179	-1.0092	0.335756
-4.64368	-0.418344	0.017694	1.11287	0.451834	0.666055	-0.821293	-0.114196	0.561613	-0.226607	0.340462	-0.222684	0.192179	0.370856	0.187301	0.272342	0.814829	0.0529963	0.68321	0.280285	0.441904	-1.00881	0.33598
-4.6432	-0.41924	0.0172716	1.11264	0.45129	0.666802	-0.823003	-0.114511	0.561711	-0.226118	0.341022	-0.222296	0.191942	0.370981	0.187348	0.272917	0.814629	0.0532786	0.68367	0.280134	0.441716	-1.00856	0.336169
-4.64272	-0.41993	0.0181529	1.11251	0.450768	0.667851	-0.823963	-0.113827	0.561849	-0.226563	0.342037	-0.221405	0.191613	0.371095	0.187537	0.273697	0.814111	0.053303	0.683596	0.279973	0.441596	-1.00888	0.336263
-4.64224	-0.420516	0.0184742	1.1129	0.451161	0.668181	-0.825233	-0.113777	0.561809	-0.226636	0.342361	-0.22037	0.19172	0.370793	0.187433	0.27469	0.813842	0.0532442	0.683811	0.279492	0.441587	-1.00886	0.335996
-4.64176	-0.421293	0.0185166	1.11304	0.451364	0.668829	-0.824952	-0.113796	0.561776	-0.225847	0.342432	-0.220098	0.192657	0.370727	0.187549	0.275313	0.813903	0.0532776	0.683962	0.279263	0.44163	-1.00905	0.336301
-4.64128	-0.422021	0.0183439	1.11238	0.451153	0.669491	-0.82528	-0.113983	0.561886	-0.224385	0.342642	-0.219375	0.19318	0.370274	0.187081	0.275787	0.813074	0.0532279	0.684408	0.279046	0.441203	-1.00901	0.33615
-4.6408	-0.422505	0.0175171	1.11311	0.451314	0.669648	-0.826346	-0.114605	0.561881	-0.224057	0.342471	-0.219378	0.193965	0.370375	0.186879	0.275717	0.812964	0.0533846	0.684693	0.278777	0.441268	-1.00915	0.336269
-4.64032	-0.423455	0.0172045	1.11276	0.451921	0.670268	-0.825844	-0.115084	0.56215	-0.223297	0.343274	-0.218153	0.194331	0.370111	0.186704	0.276146	0.812418	0.0535576	0.684838	0.278403	0.441172	-1.00954	0.336013
-4.63984	-0.424398	0.0172554	1.11288	0.451667	0.670509	-0.826078	-0.114733	0.562308	-0.222675	0.34355	-0.218717	0.19449	0.370083	0.186462	0.276988	0.811875	0.0536329	0.685039	0.278189	0.441052	-1.00957	0.336169
-4.63936	-0.424923	0.0170046	1.1131	0.451473	0.670948	-0.82766	-0.113931	0.562212	-0.222196	0.344357	-0.218559	0.194032	0.369899	0.186765	0.27779	0.811883	0.0536901	0.685063	0.277925	0.440953	-1.01002	0.336396
-4.63888	-0.424483	0.0167168	1.11343	0.451998	0.671754	-0.827818	-0.113909	0.562452	-0.222348	0.344455	-0.217958	0.193363	0.370225	0.186617	0.27805	0.811223	0.053739	0.685163	0.277862	0.440974	-1.01017	0.336512
-4.6384	-0.42498	0.0167102	1.11298	0.452323	0.672391	-0.827716	-0.114016	0.56281	-0.222124	0.345079	-0.218539	0.193089	0.370471	0.186379	0.278686	0.810206	0.0537932	0.684814	0.277342	0.440983	-1.01039	0.33644
-4.63792	-0.425147	0.0168479	1.11273	0.452778	0.672191	-0.827197	-0.113574	0.563027	-0.222212	0.34542	-0.219109	0.192982	0.370337	0.186268	0.278977	0.809282	0.0537223	0.684494	0.277199	0.441162	-1.01049	0.336231
-4.63744	-0.425838	0.0171383	1.11264	0.452663	0.673515	-0.826946	-0.113909	0.563006	-0.221139	0.34628	-0.219306	0.193034	0.370358	0.186006	0.278867	0.808533	0.0536848	0.684255	0.277066	0.441298	-1.01085	0.336229
-4.63696	-0.427424	0.0179274	1.11242	0.452795	0.673833	-0.826384	-0.114241	0.563092	-0.220612	0.346447	-0.218893	0.19358	0.370168	0.185953	0.279692	0.807954	0.0538735	0.684327	0.277103	0.441401	-1.01097	0.336286
-4.63648	-0.42778	0.0180961	1.11212	0.45292	0.673641	-0.826543	-0.114501	0.563195	-0.220383	0.346283	-0.219205	0.193995	0.369712	0.185896	0.280254	0.8074	0.0542007	0.684153	0.276587	0.441312	-1.01066	0.336572
-4.636	-0.428701	0.0179595	1.11197	0.452716	0.674063	-0.824924	-0.114357	0.563363	-0.220043	0.346831	-0.218545	0.194826	0.369499	0.18567	0.281032	0.80637	0.0541948	0.684404	0.276367	0.441207	-1.01052	0.336672
-4.63552	-0.430059	0.017967	1.1119	0.452222	0.67461	-0.825062	-0.114396	0.563596	-0.219424	0.347341	-0.218891	0.195033	0.368938	0.185669	0.281217	0.805515	0.0543632	0.684141	0.275846	0.441443	-1.01026	0.336908
-4.63504	-0.431082	0.0179375	1.11093	0.451447	0.674806	-0.825201	-0.114448	0.56388	-0.219142	0.347703	-0.219117	0.195316	0.368928	0.18575	0.281305	0.804887	0.0546847	0.684368	0.275931	0.441575	-1.01012	0.336996
-4.63456	-0.432167	0.0179031	1.11101	0.451281	0.6754	-0.824849	-0.114778	0.564011	-0.218142	0.348294	-0.218077	0.195587	0.368476	0.185718	0.28127	0.80337	0.0546068	0.684388	0.275686	0.441933	-1.00995	0.336813
-4.63408	-0.432939	0.0183454	1.11013	0.450512	0.675701	-0.82547	-0.114683	0.564295	-0.217088	0.348693	-0.2178	0.19612	0.368399	0.185695	0.281651	0.802676	0.0548065	0.684571	0.274942	0.442229	-1.00994	0.337049
-4.6336	-0.43357	0.0185558	1.10956	0.451057	0.676292	-0.826055	-0.11492	0.564222	-0.215877	0.349446	-0.218358	0.196115	0.36824	0.185811	0.282023	0.802529	0.0549825	0.684407	0.27483	0.442162	-1.0096	0.337199
-4.63312	-0.435329	0.0187799	1.10866	0.451185	0.676888	-0.826458	-0.114766	0.564279	-0.215383	0.350437	-0.218999	0.19668	0.367696	0.18593	0.28221	0.800559	0.0549951	0.684648	0.274345	0.442534	-1.0094	0.337819
-4.63264	-0.435603	0.0188694	1.10793	0.450339	0.677708	-0.826387	-0.115155	0.5643	-0.214211	0.351139	-0.218473	0.19712	0.367521	0.186131	0.282294	0.799095	0.0550039	0.685051	0.273899	0.442578	-1.00891	0.33784
-4.63216	-0.436384	0.0191674	1.10702	0.449528	0.678965	-0.825858	-0.115409	0.564534	-0.214149	0.351188	-0.218299	0.1971	0.367487	0.186106	0.283281	0.798325	0.0549352	0.685174	0.273808	0.442652	-1.00869	0.33789
-4.63168	-0.43742	0.0196438	1.10608	0.44959	0.679639	-0.825751	-0.115573	0.564427	-0.213704	0.351664	-0.218127	0.197068	0.367186	0.186026	0.283271	0.797229	0.0547589	0.684691	0.273622	0.442618	-1.00846	0.337644
-4.6312	-0.43919	0.0201039	1.1053	0.449264	0.680013	-0.825915	-0.115084	0.564414	-0.213583	0.351755	-0.218857	0.197886	0.366882	0.18553	0.283672	0.795441	0.0545721	0.684864	0.27347	0.442813	-1.00916	0.337662
-4.63072	-0.440662	0.0204262	1.10408	0.448435	0.681084	-0.826423	-0.115085	0.564513	-0.212919	0.352779	-0.218341	0.198656	0.366614	0.184823	0.283538	0.794949	0.0542786	0.684589	0.272992	0.443015	-1.00948	0.337691
-4.63024	-0.441817	0.0205378	1.10335	0.4465	0.682035	-0.8268	-0.115086	0.564416	-0.212542	0.353002	-0.217896	0.199212	0.366423	0.18475	0.283826	0.794172	0.0541779	0.684574	0.272587	0.442741	-1.00944	0.337696
-4.62976	-0.442108	0.0209118	1.10267	0.446785	0.683217	-0.826938	-0.11527	0.564402	-0.212793	0.353401	-0.218171	0.199435	0.366146	0.183715	0.28403	0.792973	0.0541304	0.684047	0.272112	0.442713	-1.0094	0.337684
-4.62928	-0.44242	0.0212566	1.10186	0.446104	0.683361	-0.82651	-0.115263	0.564414	-0.212258	0.353867	-0.217876	0.19983	0.365948	0.183318	0.284169	0.79138	0.0538551	0.68404	0.271578	0.44291	-1.0099	0.338222
-4.6288	-0.443725	0.0210061	1.10119	0.44591	0.683723	-0.826603	-0.115387	0.564364	-0.211844	0.354234	-0.218042	0.200037	0.365808	0.18324	0.284648	0.790124	0.0538086	0.684069	0.271356	0.442703	-1.00989	0.338482
-4.62832	-0.444843	0.0211617	1.1002	0.446969	0.684123	-0.826847	-0.115212	0.564392	-0.211151	0.35464	-0.218006	0.20046	0.365634	0.183315	0.28407	0.788278	0.0537717	0.683967	0.271167	0.442894	-1.00972	0.338357
-4.62784	-0.446697	0.0214583	1.09912	0.446407	0.684659	-0.827627	-0.115204	0.56432	-0.210174	0.354582	-0.218308	0.200586	0.365355	0.183051	0.28386	0.786939	0.0537924	0.683632	0.271388	0.443156	-1.00966	0.338162
-4.62736	-0.447793	0.0216299	1.09866	0.446412	0.685203	-0.827535	-0.114814	0.56455	-0.209108	0.354854	-0.218292	0.200778	0.364866	0.183312	0.283313	0.786868	0.0537256	0.683261	0.27121	0.442869	-1.00928	0.338495
-4.62688	-0.447838	0.0216941	1.09848	0.446324	0.685473	-0.82778	-0.114834	0.564465	-0.208573	0.354987	-0.218335	0.201034	0.364761	0.183413	0.283558	0.785886	0.0536481	0.683015	0.271141	0.442763	-1.00951	0.338734
-4.6264	-0.448156	0.0219065	1.09761	0.446027	0.686377	-0.827842	-0.113923	0.564665	-0.208462	0.355101	-0.219083	0.201569	0.364503	0.183222	0.283595	0.785198	0.0536932	0.682416	0.271142	0.442593	-1.00939	0.338402
-4.62592	-0.449013	0.0216417	1.09676	0.445822	0.686994	-0.828722	-0.113356	0.564813	-0.208812	0.355287	-0.217828	0.202337	0.364364	0.183437	0.283013	0.785047	0.0535147	0.682085	0.271038	0.442606	-1.00967	0.338789
-4.62544	-0.450124	0.0224287	1.09551	0.445946	0.687779	-0.828993	-0.112971	0.565176	-0.207944	0.355513	-0.217951	0.202856	0.364328	0.182966	0.282423	0.784356	0.0532365	0.682073	0.270605	0.442206	-1.0097	0.338778
-4.62496	-0.451322	0.0227239	1.09358	0.444977	0.688171	-0.829667	-0.112537	0.56544	-0.207385	0.355959	-0.217848	0.203652	0.364242	0.182959	0.282507	0.783206	0.0530844	0.681993	0.27063	0.44232	-1.00948	0.339238
-4.62448	-0.452679	0.0231809	1.0935	0.44448	0.689222	-0.830126	-0.112429	0.565693	-0.206635	0.35645	-0.218223	0.204061	0.364105	0.182865	0.282132	0.782442	0.0529522	0.681944	0.270509	0.442353	-1.00959	0.339149
-4.624	-0.453525	0.0236037	1.09317	0.4427	0.689604	-0.82951	-0.112	0.565609	-0.206361	0.356629	-0.217378	0.204457	0.364097	0.182393	0.281807	0.782394	0.0525664	0.681235	0.270254	0.442074	-1.00941	0.339085
-4.62352	-0.454216	0.0241622	1.0933	0.442327	0.689847	-0.830729	-0.111422	0.565707	-0.206297	0.356545	-0.216677	0.205114	0.363692	0.181722	0.281861	0.781933	0.0523165	0.68124	0.269978	0.442632	-1.00951	0.339013
-4.62304	-0.454722	0.0248761	1.09226	0.442964	0.690728	-0.830362	-0.11137	0.565761	-0.205567	0.356465	-0.216103	0.206151	0.363671	0.181447	0.281646	0.781893	0.0521902	0.681064	0.270108	0.442546	-1.00905	0.339507
-4.62256	-0.455188	0.0250723	1.09222	0.443347	0.691354	-0.831365	-0.111121	0.565892	-0.205011	0.356756	-0.215087	0.206815	0.363301	0.181613	0.280885	0.781045	0.0519231	0.680909	0.269729	0.44239	-1.00948	0.339805
-4.62208	-0.45628	0.0256393	1.0919	0.443375	0.692267	-0.83281	-0.110481	0.566191	-0.203966	0.357087	-0.214621	0.207021	0.363081	0.181282	0.280347	0.78058	0.0516554	0.680623	0.269644	0.442483	-1.00912	0.339851
-4.6216	-0.45748	0.0258258	1.09217	0.443536	0.692803	-0.833875	-0.109858	0.566274	-0.20402	0.357495	-0.213085	0.207424	0.362666	0.181316	0.280678	0.780576	0.0516492	0.68098	0.269434	0.442178	-1.00875	0.340106
-4.62112	-0.45847	0.0254595	1.09246	0.444178	0.693942	-0.83469	-0.109515	0.566527	-0.203817	0.357842	-0.213122	0.207724	0.362582	0.181696	0.280789	0.780499	0.0512559	0.68109	0.269129	0.442132	-1.00911	0.340366
-4.62064	-0.459295	0.0250796	1.09143	0.444838	0.694204	-0.834083	-0.109188	0.566644	-0.203483	0.358159	-0.213053	0.208337	0.362408	0.1818	0.280535	0.779999	0.0510572	0.681537	0.268848	0.442154	-1.00904	0.340821
-4.62016	-0.461589	0.0250817	1.09141	0.444877	0.694514	-0.833914	-0.108827	0.566977	-0.202664	0.358461	-0.21246	0.20806	0.362069	0.182131	0.280498	0.779571	0.0510409	0.681414	0.268805	0.441913	-1.00838	0.341087
-4.61968	-0.462685	0.0250578	1.09119	0.444409	0.694901	-0.833461	-0.10832	0.567064	-0.202443	0.359003	-0.211394	0.208844	0.361756	0.182332	0.280497	0.779028	0.0508942	0.681436	0.268319	0.442031	-1.0079	0.340808
-4.6192	-0.463509	0.0251162	1.09126	0.444496	0.695694	-0.834004	-0.108012	0.567146	-0.202451	0.359574	-0.210406	0.209097	0.361691	0.182529	0.280251	0.778745	0.0511954	0.68158	0.268301	0.441879	-1.00751	0.341121
-4.61872	-0.464346	0.02489	1.09136	0.444705	0.695878	-0.833995	-0.107598	0.567252	-0.201702	0.360203	-0.209853	0.20986	0.361435	0.182699	0.280004	0.779054	0.0507723	0.681853	0.268788	0.441868	-1.00692	0.340863
-4.61824	-0.464844	0.0251561	1.0903	0.445404	0.696567	-0.833411	-0.107147	0.567262	-0.200646	0.360834	-0.210141	0.210206	0.361306	0.182845	0.279985	0.778221	0.0501973	0.681674	0.268661	0.441982	-1.00649	0.340833
-4.61776	-0.466225	0.0252053	1.08983	0.445592	0.697295	-0.833773	-0.106255	0.567173	-0.199846	0.361212	-0.209375	0.210028	0.36135	0.182969	0.279866	0.77763	0.0500403	0.68181	0.269004	0.442163	-1.00616	0.341053
-4.61728	-0.466864	0.0261338	1.08916	0.445635	0.697718	-0.833	-0.105372	0.566975	-0.198501	0.361853	-0.20925	0.210047	0.361372	0.183288	0.279409	0.777171	0.0495278	0.681828	0.268757	0.442664	-1.00596	0.340915
-4.6168	-0.467532	0.0266056	1.08855	0.445611	0.698097	-0.833454	-0.104859	0.566971	-0.197132	0.361814	-0.208244	0.210677	0.361153	0.184028	0.279332	0.775456	0.0491226	0.682023	0.268691	0.443057	-1.00552	0.340922
-4.61632	-0.468507	0.0267566	1.08844	0.44632	0.698346	-0.834264	-0.104937	0.567249	-0.196018	0.361825	-0.207925	0.210356	0.361142	0.1849	0.279644	0.774573	0.0488661	0.681676	0.268887	0.443225	-1.00529	0.340748
-4.61584	-0.468644	0.0274485	1.08829	0.446268	0.698777	-0.833193	-0.104603	0.567378	-0.195165	0.362011	-0.206184	0.210516	0.360828	0.185085	0.280056	0.773361	0.0487291	0.681817	0.268814	0.44331	-1.00524	0.340197
-4.61536	-0.469348	0.0273159	1.08802	0.446905	0.698826	-0.832858	-0.10448	0.567223	-0.194085	0.362009	-0.205772	0.210238	0.360476	0.185515	0.279191	0.772727	0.0485874	0.682335	0.268611	0.443588	-1.00448	0.340051
-4.61488	-0.470141	0.0273239	1.08864	0.447356	0.699208	-0.832681	-0.104362	0.567047	-0.194044	0.362045	-0.205127	0.210988	0.360059	0.185721	0.279299	0.771764	0.0481503	0.682674	0.268705	0.443953	-1.00416	0.340058
-4.6144	-0.470794	0.0273631	1.08902	0.447248	0.699018	-0.832571	-0.103877	0.567103	-0.193564	0.36242	-0.203966	0.211243	0.359841	0.185852	0.279463	0.770794	0.0479999	0.682751	0.268534	0.443816	-1.00457	0.340037
-4.61392	-0.47176	0.0273072	1.08879	0.447698	0.699625	-0.832732	-0.10367	0.56732	-0.192109	0.362642	-0.204	0.212035	0.359616	0.186239	0.27883	0.769856	0.0480304	0.682871	0.268738	0.443951	-1.00447	0.339845
-4.61344	-0.473353	0.0275149	1.08913	0.447699	0.700203	-0.832492	-0.103668	0.56737	-0.191081	0.362999	-0.203655	0.212296	0.359458	0.186957	0.27882	0.768421	0.0476674	0.683027	0.268958	0.444075	-1.00429	0.340085
-4.61296	-0.475215	0.0273688	1.08866	0.447205	0.7011	-0.833162	-0.103426	0.567329	-0.190828	0.363356	-0.203224	0.212922	0.359196	0.187272	0.278351	0.767195	0.0477552	0.683497	0.268749	0.444013	-1.00495	0.340137
-4.61248	-0.476168	0.0276121	1.08827	0.447497	0.701678	-0.834478	-0.10292	0.567342	-0.190174	0.363175	-0.202801	0.213533	0.358852	0.187939	0.2779	0.766868	0.0481888	0.683636	0.268547	0.444459	-1.00482	0.340313
-4.612	-0.476855	0.027913	1.08853	0.446896	0.701687	-0.835443	-0.102609	0.567154	-0.188929	0.3635	-0.201473	0.214807	0.3587	0.188356	0.277311	0.765939	0.048457	0.683915	0.268478	0.444436	-1.00505	0.340045
-4.61152	-0.477682	0.0284749	1.08823	0.447698	0.701838	-0.83761	-0.102549	0.567181	-0.188317	0.363586	-0.20087	0.214972	0.358611	0.188524	0.276933	0.765978	0.0486409	0.684198	0.268225	0.444809	-1.00522	0.339565
-4.61104	-0.479073	0.0284297	1.08837	0.448098	0.70242	-0.838247	-0.10254	0.567232	-0.187146	0.364024	-0.200185	0.215458	0.358452	0.18926	0.276607	0.765217	0.0488979	0.684239	0.268242	0.445084	-1.00464	0.33984
-4.61056	-0.479806	0.028404	1.08768	0.449874	0.703117	-0.838749	-0.102129	0.567219	-0.186969	0.363887	-0.199356	0.216786	0.358099	0.189794	0.275902	0.764183	0.0487818	0.68422	0.268176	0.445232	-1.00426	0.340077
-4.61008	-0.481871	0.0292517	1.08717	0.449517	0.703421	-0.838133	-0.102222	0.567296	-0.186517	0.364396	-0.197961	0.216898	0.357562	0.190259	0.276024	0.763186	0.0490214	0.68474	0.267582	0.4448	-1.00414	0.33984
-4.6096	-0.483745	0.0295888	1.08604	0.449207	0.70403	-0.837646	-0.101662	0.567176	-0.185926	0.364737	-0.196088	0.217498	0.35708	0.190973	0.275813	0.762038	0.0493919	0.684941	0.267318	0.444985	-1.00415	0.339651
-4.60912	-0.485126	0.0301997	1.0861	0.449345	0.705029	-0.839254	-0.10123	0.56736	-0.18498	0.364738	-0.196106	0.218068	0.356535	0.191051	0.275689	0.761298	0.0497594	0.685126	0.267	0.444959	-1.00383	0.339545
-4.60864	-0.486202	0.0302052	1.08526	0.449829	0.705758	-0.839595	-0.100957	0.567438	-0.184693	0.365117	-0.195427	0.217799	0.355853	0.191462	0.27532	0.760404	0.0498246	0.68517	0.266717	0.444956	-1.00374	0.338943
-4.60816	-0.487309	0.0305914	1.08465	0.449682	0.706223	-0.839731	-0.100544	0.567677	-0.183737	0.364861	-0.195137	0.217802	0.355836	0.192282	0.275277	0.758721	0.0498976	0.685236	0.266792	0.445005	-1.00373	0.338819
-4.60768	-0.487277	0.0303089	1.0842	0.44929	0.706841	-0.840785	-0.100917	0.567607	-0.182522	0.364769	-0.194271	0.218501	0.355535	0.193111	0.275537	0.7578	0.0501914	0.685396	0.266682	0.445172	-1.00367	0.338277
-4.6072	-0.488669	0.0304227	1.08372	0.448669	0.707854	-0.841024	-0.100892	0.567425	-0.181187	0.364861	-0.193772	0.218896	0.355506	0.193286	0.275344	0.757652	0.0502336	0.685445	0.266871	0.445015	-1.00349	0.337812
-4.60672	-0.489859	0.0304721	1.08401	0.449287	0.708092	-0.841756	-0.100672	0.567452	-0.180695	0.365348	-0.191638	0.218363	0.355578	0.19336	0.275516	0.757006	0.0504697	0.685627	0.266723	0.444929	-1.0039	0.337617
-4.60624	-0.490306	0.0308338	1.08437	0.449922	0.708745	-0.841937	-0.100655	0.56758	-0.180167	0.365858	-0.190829	0.218075	0.355185	0.193592	0.275462	0.756283	0.0504819	0.685761	0.266348	0.444575	-1.00445	0.337834
-4.60576	-0.490998	0.0315957	1.08471	0.450567	0.709409	-0.842277	-0.100027	0.567465	-0.179514	0.366354	-0.189048	0.218239	0.355424	0.194056	0.275782	0.755906	0.0507726	0.685877	0.266341	0.444449	-1.00388	0.33745
-4.60528	-0.492522	0.0314709	1.08475	0.449461	0.709576	-0.841845	-0.099862	0.567802	-0.179296	0.366545	-0.188035	0.218032	0.355597	0.194769	0.2752	0.755305	0.0510885	0.686027	0.265982	0.444462	-1.00371	0.337496
-4.6048	-0.492712	0.0315444	1.08495	0.44867	0.709848	-0.841598	-0.0997197	0.567632	-0.178632	0.366899	-0.187157	0.217814	0.355509	0.194916	0.275282	0.755041	0.0511215	0.685909	0.265735	0.444497	-1.00387	0.337637
-4.60432	-0.492946	0.0315459	1.08467	0.447665	0.710537	-0.84264	-0.099271	0.567564	-0.177587	0.367437	-0.186374	0.217949	0.355431	0.195113	0.274365	0.754675	0.0511613	0.685989	0.265482	0.444499	-1.00394	0.337788
-4.60384	-0.49325	0.0313499	1.08455	0.44759	0.711143	-0.843639	-0.100099	0.567709	-0.177101	0.367714	-0.184446	0.21836	0.355196	0.195512	0.273482	0.754272	0.051364	0.686173	0.265311	0.444446	-1.00384	0.337757
-4.60336	-0.494375	0.0319271	1.08446	0.448645	0.711135	-0.84314	-0.100277	0.567859	-0.176538	0.368072	-0.183124	0.218738	0.355032	0.195244	0.273637	0.75391	0.0516852	0.685824	0.264999	0.444074	-1.00391	0.337482
-4.60288	-0.494866	0.0321893	1.08376	0.447646	0.712028	-0.844036	-0.100437	0.567824	-0.175815	0.368783	-0.181695	0.217749	0.354864	0.195493	0.273743	0.753593	0.0523088	0.68566	0.265065	0.443877	-1.00442	0.337335
-4.6024	-0.494814	0.0322703	1.08283	0.447051	0.712431	-0.844669	-0.100249	0.567574	-0.174717	0.368724	-0.180664	0.217671	0.355144	0.195831	0.273928	0.752812	0.052394	0.685757	0.264806	0.444152	-1.00468	0.337549
-4.60192	-0.495431	0.0323887	1.08256	0.446808	0.712664	-0.845894	-0.100233	0.567408	-0.174005	0.369024	-0.178921	0.217261	0.354664	0.195819	0.273966	0.752272	0.0528716	0.685735	0.264494	0.444435	-1.00436	0.337516
-4.60144	-0.495963	0.0328391	1.08249	0.447205	0.713059	-0.845608	-0.100741	0.567207	-0.172597	0.369253	-0.178624	0.216925	0.354647	0.196029	0.274316	0.751721	0.0532605	0.685747	0.26408	0.444964	-1.00366	0.337327
-4.60096	-0.496407	0.032986	1.08242	0.446307	0.713093	-0.845123	-0.101061	0.567208	-0.171805	0.369877	-0.176431	0.216471	0.354576	0.196296	0.274418	0.751225	0.0535122	0.685731	0.26414	0.444719	-1.00337	0.336849
-4.60048	-0.496865	0.0334277	1.08256	0.44586	0.713491	-0.846835	-0.100746	0.567282	-0.170751	0.369918	-0.174664	0.216287	0.354595	0.19645	0.274242	0.751666	0.053897	0.685812	0.263824	0.444873	-1.00386	0.336765
-4.6	-0.497069	0.0333313	1.08209	0.445737	0.714283	-0.847842	-0.100787	0.567343	-0.170114	0.370019	-0.173499	0.216295	0.354535	0.196661	0.273855	0.751583	0.0537679	0.685856	0.26376	0.444818	-1.00442	0.33629
-4.59952	-0.498033	0.0337025	1.08158	0.445061	0.714771	-0.848336	-0.100592	0.567127	-0.169279	0.370446	-0.172908	0.215816	0.354366	0.196323	0.273799	0.751158	0.0539921	0.686219	0.263748	0.444553	-1.00431	0.336588
-4.59904	-0.498618	0.0338193	1.08152	0.44507	0.71502	-0.848762	-0.100989	0.567112	-0.168124	0.370591	-0.172952	0.215498	0.354173	0.196076	0.273538	0.751455	0.0543946	0.686611	0.263863	0.444809	-1.00434	0.336359
-4.59856	-0.49911	0.0341932	1.08103	0.445488	0.7159	-0.849832	-0.100261	0.567109	-0.167484	0.37042	-0.17211	0.214905	0.354018	0.195953	0.273115	0.75082	0.0544544	0.686876	0.263696	0.444917	-1.00442	0.335959
-4.59808	-0.499945	0.0344493	1.08116	0.446168	0.715901	-0.850961	-0.100029	0.567174	-0.165518	0.371216	-0.171579	0.213641	0.353732	0.196158	0.273201	0.750598	0.0544518	0.687488	0.26368	0.444647	-1.00467	0.335655
-4.5976	-0.500248	0.0350866	1.08119	0.447089	0.716403	-0.849557	-0.0994357	0.566928	-0.164805	0.371625	-0.170358	0.212668	0.353958	0.196164	0.272967	0.74972	0.0546176	0.68786	0.263555	0.44441	-1.00497	0.335524
-4.59712	-0.501599	0.0352051	1.08152	0.446345	0.716702	-0.850231	-0.0994381	0.566745	-0.164377	0.372054	-0.169608	0.212166	0.353734	0.195847	0.272795	0.749744	0.054937	0.68787	0.263241	0.444905	-1.0052	0.335082
-4.59664	-0.502092	0.0355822	1.08141	0.446246	0.71707	-0.850567	-0.0989445	0.566378	-0.163624	0.372479	-0.168367	0.211311	0.353686	0.195608	0.273397	0.749288	0.055051	0.687862	0.263192	0.444487	-1.00533	0.334612
-4.59616	-0.502622	0.0356744	1.08106	0.445692	0.716962	-0.850453	-0.0988552	0.566465	-0.16258	0.373208	-0.167292	0.21034	0.35389	0.195194	0.273619	0.748834	0.0555009	0.688215	0.262925	0.44462	-1.00571	0.334061
-4.59568	-0.503954	0.0353101	1.08115	0.445064	0.717546	-0.849739	-0.0989036	0.56621	-0.161472	0.373908	-0.166596	0.209365	0.353697	0.195276	0.27319	0.748754	0.0559939	0.688428	0.262433	0.444925	-1.00547	0.333512
-4.5952	-0.505778	0.0351777	1.0813	0.444121	0.717957	-0.850171	-0.0993171	0.56613	-0.160216	0.37406	-0.166036	0.208322	0.353521	0.195041	0.272439	0.748958	0.0561979	0.688244	0.262334	0.445203	-1.00545	0.333229
-4.59472	-0.506344	0.0349504	1.08134	0.444885	0.719105	-0.850731	-0.0993912	0.565952	-0.159588	0.374863	-0.16516	0.208279	0.353585	0.194806	0.271994	0.749025	0.0561535	0.688175	0.262195	0.445284	-1.00556	0.333273
-4.59424	-0.507788	0.0344254	1.08154	0.445913	0.719602	-0.851373	-0.0994423	0.5658	-0.158812	0.376045	-0.163105	0.207657	0.353746	0.194342	0.272628	0.749054	0.0564004	0.688243	0.261772	0.445242	-1.00516	0.333357
-4.59376	-0.508036	0.0346335	1.08098	0.445779	0.719907	-0.851309	-0.100032	0.565693	-0.158141	0.376896	-0.16123	0.20698	0.353724	0.194117	0.272661	0.748965	0.0568586	0.68819	0.261334	0.445172	-1.0059	0.332802
-4.59328	-0.509216	0.0350317	1.08072	0.446358	0.720314	-0.852067	-0.0999095	0.565354	-0.156389	0.377797	-0.160403	0.206564	0.353761	0.193708	0.273005	0.748505	0.0570152	0.688208	0.261244	0.445375	-1.00608	0.332391
-4.5928	-0.51015	0.0352762	1.08116	0.446543	0.721134	-0.850365	-0.0999212	0.565086	-0.155092	0.377933	-0.159507	0.207052	0.353766	0.193736	0.272815	0.748063	0.0571028	0.688395	0.261127	0.445784	-1.0065	0.332156
-4.59232	-0.510589	0.0355688	1.08149	0.447125	0.720901	-0.851685	-0.0998645	0.564901	-0.153779	0.37833	-0.158524	0.206668	0.353462	0.193527	0.27253	0.747297	0.0571799	0.688709	0.261346	0.446229	-1.00677	0.331763
-4.59184	-0.510301	0.0358123	1.08176	0.447725	0.721421	-0.852539	-0.099987	0.564872	-0.153371	0.378928	-0.156922	0.20668	0.35344	0.193659	0.272533	0.746621	0.0570659	0.688919	0.261565	0.446243	-1.00741	0.331651
-4.59136	-0.511256	0.0358703	1.08173	0.447892	0.721536	-0.852961	-0.099666	0.564768	-0.151798	0.379539	-0.156169	0.206192	0.353357	0.193375	0.271814	0.746659	0.0572982	0.689289	0.261441	0.445775	-1.00752	0.331541
-4.59088	-0.511324	0.0361199	1.08181	0.448599	0.721943	-0.851826	-0.0996464	0.564534	-0.150621	0.380651	-0.154152	0.20597	0.353182	0.193071	0.271892	0.746532	0.0574443	0.689722	0.261556	0.445534	-1.00794	0.331133
-4.5904	-0.511112	0.0365325	1.08247	0.447694	0.721853	-0.851329	-0.0995344	0.564571	-0.148649	0.381529	-0.152923	0.205583	0.352679	0.192928	0.272258	0.746198	0.0575365	0.68981	0.261599	0.445467	-1.00842	0.330254
-4.58992	-0.511046	0.0369275	1.08299	0.447511	0.722211	-0.85173	-0.099724	0.564293	-0.14765	0.38217	-0.15188	0.205089	0.352114	0.192825	0.272669	0.745454	0.0579454	0.69024	0.261331	0.445594	-1.00903	0.329938
-4.58944	-0.512672	0.0377985	1.08336	0.447022	0.723046	-0.852184	-0.0994383	0.564276	-0.145982	0.38304	-0.151388	0.204904	0.352167	0.192421	0.272818	0.745154	0.0579208	0.690853	0.261243	0.445765	-1.00958	0.329568
-4.58896	-0.513116	0.0378633	1.08381	0.44634	0.723575	-0.850832	-0.0993939	0.564066	-0.145279	0.384083	-0.150065	0.204643	0.3518	0.192175	0.273063	0.744824	0.0581088	0.691036	0.26099	0.446297	-1.00944	0.329579
-4.58848	-0.514105	0.0386087	1.08442	0.446167	0.724499	-0.850474	-0.100133	0.564102	-0.144951	0.385254	-0.14841	0.204183	0.351597	0.191925	0.272948	0.745146	0.0584108	0.690914	0.261026	0.446611	-1.00922	0.329249
-4.588	-0.514475	0.038862	1.08403	0.445986	0.725107	-0.848708	-0.0993986	0.564072	-0.144159	0.386016	-0.146924	0.20416	0.351091	0.191452	0.27323	0.74482	0.0587725	0.691331	0.260919	0.446925	-1.00916	0.329018
-4.58752	-0.514895	0.0391973	1.08395	0.446354	0.725459	-0.847877	-0.0988499	0.564106	-0.143116	0.386954	-0.147123	0.203683	0.350736	0.191916	0.273668	0.744709	0.0590769	0.691747	0.260899	0.447248	-1.00923	0.328958
-4.58704	-0.51452	0.0390675	1.08379	0.44529	0.725739	-0.846501	-0.0988291	0.56388	-0.14113	0.387806	-0.146407	0.202423	0.350296	0.192091	0.274005	0.745134	0.0592605	0.691883	0.260713	0.447324	-1.00899	0.328787
-4.58656	-0.515681	0.0394014	1.08413	0.445703	0.726163	-0.843206	-0.0988643	0.563693	-0.140406	0.388978	-0.145341	0.201139	0.349631	0.192072	0.274245	0.745251	0.0595924	0.692075	0.260436	0.447661	-1.00881	0.328563
-4.58608	-0.515933	0.0388395	1.0847	0.444723	0.726383	-0.842564	-0.0986807	0.563558	-0.139647	0.389815	-0.144576	0.200178	0.349008	0.191885	0.274288	0.745361	0.0599327	0.692257	0.260076	0.44789	-1.00883	0.328387
-4.5856	-0.51615	0.0392103	1.08494	0.444578	0.726419	-0.840302	-0.0985068	0.563222	-0.1393	0.390275	-0.144421	0.199801	0.348619	0.19157	0.27454	0.74475	0.0602182	0.692594	0.259998	0.447833	-1.00859	0.327818
-4.58512	-0.516667	0.0394851	1.08557	0.44365	0.727071	-0.839303	-0.0989964	0.563173	-0.139081	0.391162	-0.143859	0.198916	0.348251	0.191608	0.274816	0.744142	0.0602154	0.692969	0.259489	0.447962	-1.00905	0.327553
-4.58464	-0.518022	0.0403396	1.08614	0.442704	0.727485	-0.838335	-0.0987018	0.563173	-0.138072	0.391934	-0.142868	0.198053	0.348063	0.191159	0.274895	0.743696	0.0603595	0.693472	0.258863	0.448004	-1.0094	0.32752
-4.58416	-0.518672	0.0407794	1.08677	0.44243	0.727239	-0.836505	-0.0988034	0.563147	-0.137483	0.392763	-0.142887	0.197109	0.34759	0.191234	0.275354	0.743554	0.0604325	0.693626	0.258918	0.448411	-1.00919	0.327507
-4.58368	-0.51906	0.0418918	1.08715	0.441743	0.727934	-0.835866	-0.0986491	0.562874	-0.136965	0.393654	-0.14302	0.19615	0.347841	0.191314	0.275678	0.743266	0.0603685	0.693535	0.258733	0.449162	-1.009	0.326906
-4.5832	-0.519127	0.041936	1.08779	0.441545	0.728495	-0.835181	-0.0984121	0.563015	-0.13569	0.394653	-0.142287	0.195806	0.347629	0.190995	0.275753	0.743957	0.0605809	0.693904	0.258664	0.449229	-1.00854	0.32661
-4.58272	-0.520009	0.0425084	1.08791	0.440414	0.729167	-0.833971	-0.0977719	0.563134	-0.134978	0.395654	-0.141253	0.195272	0.347161	0.190922	0.276232	0.743745	0.0609445	0.694137	0.258707	0.449543	-1.00795	0.326353
-4.58224	-0.519292	0.0431926	1.089	0.439815	0.729591	-0.831056	-0.0976334	0.56307	-0.134176	0.396227	-0.140832	0.194588	0.346586	0.190756	0.276901	0.743996	0.0609415	0.694349	0.258374	0.449923	-1.00821	0.326309
-4.58176	-0.519334	0.0443617	1.08921	0.439345	0.730265	-0.830704	-0.0969544	0.562962	-0.133651	0.397405	-0.138952	0.19369	0.346117	0.190208	0.277505	0.744631	0.0611607	0.694766	0.258318	0.450062	-1.00859	0.32579
-4.58128	-0.519401	0.0450022	1.08951	0.438864	0.731107	-0.829678	-0.0963048	0.563195	-0.132652	0.39799	-0.138008	0.192647	0.345309	0.189745	0.278131	0.744813	0.0612983	0.695325	0.258654	0.450042	-1.00808	0.325372
-4.5808	-0.52002	0.0458727	1.0901	0.438525	0.731807	-0.826924	-0.0963009	0.563241	-0.131334	0.398426	-0.137996	0.191761	0.344968	0.189331	0.278096	0.744875	0.0613107	0.695404	0.258924	0.450085	-1.00789	0.324841
-4.58032	-0.520717	0.0465676	1.0906	0.438496	0.732942	-0.825797	-0.0954125	0.563416	-0.13052	0.399223	-0.136841	0.191459	0.344278	0.189151	0.277801	0.745279	0.0616753	0.695793	0.258658	0.450005	-1.00803	0.324605
-4.57984	-0.521117	0.0471735	1.09074	0.438837	0.733854	-0.824593	-0.0942796	0.563317	-0.130788	0.399751	-0.136445	0.190049	0.344297	0.189306	0.277968	0.745329	0.0619587	0.696426	0.258727	0.450272	-1.00769	0.324263
-4.57936	-0.521084	0.0481643	1.09167	0.439155	0.734427	-0.824175	-0.0940756	0.563354	-0.13065	0.400402	-0.135501	0.189425	0.343908	0.188978	0.277747	0.745557	0.0623139	0.696814	0.258944	0.450547	-1.00742	0.323656
-4.57888	-0.521338	0.0490982	1.09206	0.438575	0.735398	-0.82381	-0.0936311	0.563455	-0.130207	0.401598	-0.135171	0.188217	0.343486	0.188664	0.277694	0.745227	0.0622734	0.697013	0.25889	0.450809	-1.0072	0.323157
-4.5784	-0.521246	0.0497071	1.0924	0.437957	0.735767	-0.822633	-0.0932284	0.563481	-0.129653	0.402085	-0.133223	0.187061	0.343187	0.188367	0.277544	0.745081	0.0626396	0.697304	0.258957	0.45093	-1.00718	0.32318
-4.57792	-0.521588	0.0502566	1.09272	0.43772	0.736357	-0.822473	-0.0921978	0.563352	-0.128871	0.403091	-0.132579	0.186571	0.342753	0.188444	0.277619	0.745278	0.0627562	0.697488	0.259008	0.450998	-1.00654	0.323004
-4.57744	-0.521879	0.0517424	1.09254	0.438064	0.736701	-0.821725	-0.0915404	0.563409	-0.128748	0.403897	-0.131907	0.186055	0.34294	0.188222	0.277339	0.745052	0.0631935	0.697772	0.259201	0.451081	-1.00679	0.322519
-4.57696	-0.523243	0.0526415	1.09272	0.437796	0.737769	-0.819573	-0.0908375	0.56355	-0.128285	0.404606	-0.131941	0.185034	0.342583	0.187919	0.277593	0.745308	0.0633994	0.698004	0.259414	0.451422	-1.00704	0.322167
-4.57648	-0.52365	0.0525969	1.09313	0.439244	0.738984	-0.819844	-0.089956	0.563568	-0.128161	0.405248	-0.131191	0.183962	0.342727	0.187517	0.277758	0.745624	0.0635233	0.698512	0.259516	0.451713	-1.00685	0.322118
-4.576	-0.524043	0.0529239	1.09386	0.440478	0.739741	-0.818349	-0.0893878	0.563619	-0.1279	0.406128	-0.131303	0.183265	0.342319	0.187161	0.277508	0.745241	0.0637557	0.698521	0.259457	0.452008	-1.00654	0.321753
-4.57552	-0.524159	0.0535555	1.0941	0.441495	0.740071	-0.816927	-0.0884385	0.563727	-0.127027	0.406996	-0.131152	0.18215	0.342172	0.186879	0.277434	0.745383	0.0641249	0.698701	0.259294	0.45236	-1.00658	0.321281
-4.57504	-0.524483	0.0542241	1.09447	0.442307	0.741176	-0.816224	-0.0872922	0.563757	-0.126181	0.407787	-0.131319	0.182012	0.342446	0.186579	0.276921	0.745434	0.0645354	0.698703	0.259243	0.452638	-1.00702	0.320843
-4.57456	-0.526241	0.0546946	1.09476	0.442784	0.741706	-0.815471	-0.0864972	0.563928	-0.125032	0.408261	-0.130435	0.18092	0.342245	0.186413	0.277614	0.744978	0.0653338	0.699089	0.259295	0.45298	-1.00743	0.321022
-4.57408	-0.526503	0.0558196	1.09458	0.44277	0.742611	-0.814751	-0.0855649	0.563965	-0.123899	0.4094	-0.130271	0.180883	0.342124	0.186197	0.277264	0.745134	0.0657362	0.699436	0.259161	0.453407	-1.00801	0.320309
-4.5736	-0.527069	0.0561914	1.09501	0.442365	0.743338	-0.814128	-0.0851705	0.563927	-0.123238	0.409995	-0.130007	0.18006	0.342029	0.185536	0.277648	0.744314	0.0660566	0.699774	0.259348	0.453672	-1.00829	0.320114
-4.57312	-0.527306	0.0570437	1.09488	0.442613	0.743637	-0.81317	-0.0843006	0.564142	-0.124102	0.410674	-0.130927	0.178967	0.342003	0.185374	0.277786	0.744286	0.0665382	0.699755	0.259258	0.453725	-1.00853	0.320096
-4.57264	-0.527532	0.0577802	1.09598	0.442488	0.74434	-0.81159	-0.0843156	0.564213	-0.125036	0.411619	-0.130971	0.179018	0.341714	0.184764	0.277943	0.74422	0.0668741	0.700249	0.259238	0.45385	-1.0082	0.31987
-4.57216	-0.527535	0.0576893	1.09665	0.443037	0.744278	-0.810127	-0.0836656	0.564145	-0.124948	0.412297	-0.130992	0.178197	0.341555	0.184177	0.277925	0.74401	0.0674242	0.700241	0.259224	0.454267	-1.0094	0.319848
-4.57168	-0.527625	0.0577859	1.0977	0.443394	0.7449	-0.808687	-0.0836088	0.564257	-0.125081	0.413271	-0.130225	0.177738	0.341656	0.18363	0.278352	0.743944	0.0677849	0.700414	0.259575	0.454073	-1.00923	0.319873
-4.5712	-0.52752	0.0584468	1.0986	0.44395	0.745524	-0.807301	-0.0834262	0.564342	-0.124957	0.413655	-0.129577	0.177787	0.341739	0.183386	0.278455	0.743734	0.0683024	0.700321	0.259434	0.454393	-1.00882	0.319575
-4.57072	-0.528968	0.0587955	1.09861	0.443168	0.746469	-0.806099	-0.0827814	0.564072	-0.124893	0.41445	-0.128564	0.177316	0.341855	0.183325	0.27848	0.743834	0.068858	0.700073	0.25933	0.454398	-1.00894	0.319384
-4.57024	-0.528951	0.0599866	1.09907	0.444707	0.747459	-0.805513	-0.0822018	0.563852	-0.124924	0.414952	-0.128816	0.176717	0.34162	0.183263	0.278471	0.74436	0.0690013	0.700426	0.259323	0.454468	-1.00924	0.319529
-4.56976	-0.528392	0.0607396	1.09911	0.444855	0.748437	-0.803488	-0.0815144	0.563761	-0.124496	0.415106	-0.128831	0.176722	0.341662	0.182801	0.27855	0.744428	0.0692194	0.70036	0.259514	0.454473	-1.00973	0.319501
-4.56928	-0.528188	0.0612408	1.09928	0.445901	0.748947	-0.804226	-0.0810754	0.563648	-0.124698	0.415076	-0.1284	0.175543	0.341544	0.182269	0.277903	0.744484	0.0694857	0.700574	0.259536	0.454163	-1.01026	0.319145
-4.5688	-0.528234	0.0617282	1.09875	0.446837	0.749325	-0.802712	-0.0803521	0.563304	-0.124491	0.415576	-0.128429	0.175494	0.341575	0.1815	0.277817	0.743913	0.0697408	0.700767	0.259656	0.454356	-1.01084	0.318721
-4.56832	-0.529415	0.062266	1.09851	0.448589	0.749961	-0.802608	-0.0800863	0.563329	-0.124613	0.415642	-0.127631	0.175163	0.34148	0.18126	0.277412	0.743508	0.0702135	0.700953	0.259704	0.454726	-1.01128	0.318278
-4.56784	-0.529513	0.0622997	1.09844	0.449508	0.750548	-0.802856	-0.0793217	0.563473	-0.124601	0.416165	-0.127336	0.17511	0.341141	0.180908	0.276905	0.742898	0.0703528	0.701274	0.26002	0.45465	-1.01151	0.318031
-4.56736	-0.530579	0.0622761	1.09889	0.450612	0.751176	-0.802315	-0.0791884	0.563582	-0.124111	0.416875	-0.127723	0.174884	0.340903	0.180575	0.27685	0.742361	0.0707165	0.701221	0.259939	0.454606	-1.01172	0.317814
-4.56688	-0.530856	0.0630902	1.09875	0.45111	0.750867	-0.801863	-0.0786893	0.563549	-0.12416	0.416583	-0.128138	0.174071	0.341146	0.180728	0.276458	0.741765	0.0711081	0.701338	0.259995	0.454368	-1.01164	0.317918
-4.5664	-0.5315	0.0637191	1.09881	0.452375	0.750859	-0.801575	-0.0780016	0.563191	-0.123277	0.416477	-0.128801	0.173577	0.340597	0.180653	0.276716	0.74089	0.0712194	0.701473	0.260275	0.454128	-1.01178	0.317812
-4.56592	-0.532433	0.0639645	1.09862	0.454459	0.751075	-0.801138	-0.0776914	0.563026	-0.123335	0.416903	-0.12872	0.173487	0.34018	0.180073	0.276582	0.740639	0.0715248	0.701161	0.260055	0.453825	-1.01159	0.318042
-4.56544	-0.533077	0.0636315	1.09846	0.456254	0.751597	-0.801233	-0.0773259	0.56306	-0.122216	0.41746	-0.128201	0.173224	0.339638	0.179995	0.276539	0.739484	0.0716307	0.700949	0.260035	0.453557	-1.01272	0.31763
-4.56496	-0.534175	0.0634388	1.09846	0.45706	0.752242	-0.801203	-0.0769155	0.563063	-0.122634	0.417306	-0.127971	0.172624	0.33928	0.18007	0.276547	0.738891	0.0720739	0.701079	0.260308	0.452922	-1.01292	0.317312
-4.56448	-0.534449	0.0633968	1.09834	0.458251	0.752222	-0.801174	-0.0769072	0.563132	-0.121521	0.417072	-0.127709	0.17182	0.338796	0.17966	0.276889	0.738136	0.0723011	0.701054	0.260468	0.45257	-1.01283	0.317092
-4.564	-0.535158	0.063676	1.09836	0.460305	0.752326	-0.80196	-0.0765431	0.563038	-0.121082	0.417213	-0.127972	0.170724	0.338172	0.179253	0.276874	0.737907	0.0725352	0.701418	0.260616	0.45209	-1.01265	0.316519
-4.56352	-0.536026	0.0640513	1.0991	0.460185	0.752907	-0.801116	-0.0762666	0.563038	-0.121219	0.416915	-0.128697	0.170857	0.337462	0.179118	0.276899	0.737045	0.0729442	0.701648	0.260832	0.45176	-1.01282	0.316529
-4.56304	-0.536279	0.0641005	1.09862	0.461813	0.753563	-0.802338	-0.0755759	0.562912	-0.120129	0.416845	-0.128099	0.16998	0.336827	0.179253	0.276929	0.736729	0.0732783	0.702265	0.260952	0.451717	-1.01217	0.316285
-4.56256	-0.536756	0.0646298	1.09903	0.463257	0.753642	-0.801295	-0.0755119	0.562905	-0.120799	0.416384	-0.127754	0.169883	0.336733	0.178786	0.27632	0.736458	0.0737651	0.702275	0.261065	0.450991	-1.01204	0.315894
-4.56208	-0.536394	0.0643338	1.09836	0.463046	0.753513	-0.801443	-0.0752602	0.562849	-0.120552	0.415665	-0.127756	0.169015	0.336911	0.178923	0.276165	0.736046	0.0739796	0.702442	0.261036	0.45073	-1.01184	0.31581
-4.5616	-0.53768	0.0645743	1.0987	0.463775	0.754351	-0.802353	-0.0748245	0.562709	-0.120493	0.415709	-0.128441	0.169398	0.336816	0.179043	0.276082	0.73593	0.073899	0.702552	0.261029	0.450385	-1.0114	0.315368
-4.56112	-0.537443	0.0645526	1.09876	0.464439	0.755199	-0.803129	-0.0743524	0.562575	-0.119803	0.41583	-0.128502	0.168563	0.336114	0.178724	0.27584	0.73591	0.0739456	0.702899	0.261075	0.450169	-1.01148	0.315334
-4.56064	-0.538706	0.0647698	1.09929	0.465407	0.755566	-0.803738	-0.0743107	0.562534	-0.119726	0.415915	-0.128063	0.168366	0.335534	0.178635	0.275157	0.735807	0.0740477	0.703241	0.260939	0.44971	-1.0117	0.315276
-4.56016	-0.539976	0.0648022	1.0987	0.466098	0.756224	-0.804294	-0.0737702	0.56245	-0.119788	0.415928	-0.128559	0.1683	0.334814	0.178323	0.274945	0.735395	0.0742781	0.703377	0.261179	0.449318	-1.01174	0.314996
-4.55968	-0.540684	0.0651132	1.09904	0.466826	0.756361	-0.803841	-0.0731401	0.562382	-0.119249	0.416036	-0.128427	0.168111	0.334414	0.177576	0.275001	0.735182	0.0745786	0.703944	0.261485	0.448954	-1.01161	0.314802
-4.5592	-0.541124	0.0654465	1.09859	0.466746	0.756822	-0.803371	-0.072767	0.562356	-0.117789	0.416038	-0.128356	0.167557	0.334161	0.177382	0.274885	0.734715	0.0748544	0.70458	0.261717	0.449025	-1.01237	0.314348
-4.55872	-0.54162	0.0656339	1.09815	0.467552	0.758103	-0.803556	-0.0718781	0.562071	-0.117217	0.415853	-0.128276	0.167533	0.333709	0.17745	0.274741	0.734775	0.0750878	0.704999	0.261723	0.448674	-1.01202	0.31454
-4.55824	-0.541758	0.0666572	1.09793	0.467918	0.758423	-0.802897	-0.0715879	0.561873	-0.116455	0.41575	-0.127528	0.167032	0.333394	0.177259	0.274279	0.733825	0.0754767	0.705565	0.261836	0.448491	-1.01161	0.31445
-4.55776	-0.541887	0.067253	1.0971	0.469208	0.759163	-0.801727	-0.0708329	0.561953	-0.115929	0.415523	-0.12777	0.166542	0.333276	0.176981	0.274063	0.734153	0.0756988	0.705785	0.262082	0.44824	-1.01152	0.314257
-4.55728	-0.542614	0.0674489	1.0968	0.470384	0.759579	-0.800827	-0.0698164	0.561912	-0.11521	0.415308	-0.127576	0.16604	0.332778	0.176651	0.273561	0.7342	0.0757939	0.706001	0.262263	0.448003	-1.01116	0.314016
-4.5568	-0.542458	0.0678015	1.09657	0.472084	0.76025	-0.799757	-0.0698	0.561894	-0.113752	0.414994	-0.127946	0.166826	0.33237	0.176452	0.273347	0.734219	0.0758975	0.706228	0.262142	0.447735	-1.01114	0.313999
-4.55632	-0.542391	0.068074	1.09613	0.472222	0.760999	-0.799683	-0.0695048	0.561813	-0.112882	0.414521	-0.128587	0.166462	0.331969	0.176117	0.273191	0.734403	0.0762164	0.706501	0.262436	0.447723	-1.01118	0.31377
-4.55584	-0.543275	0.0684978	1.09602	0.473113	0.761778	-0.799845	-0.0689216	0.561727	-0.112966	0.414739	-0.1282	0.166493	0.331593	0.17585	0.272949	0.734571	0.0765377	0.707013	0.262532	0.447182	-1.01127	0.313474
-4.55536	-0.543367	0.0692775	1.09532	0.473647	0.761715	-0.798812	-0.0687626	0.561708	-0.112559	0.414093	-0.128579	0.165922	0.331379	0.175788	0.272714	0.734428	0.0766622	0.707414	0.262821	0.446806	-1.01116	0.313206
-4.55488	-0.543755	0.0695606	1.09465	0.473714	0.762097	-0.798927	-0.0681672	0.561807	-0.111965	0.414198	-0.129197	0.165368	0.33126	0.175769	0.272908	0.733556	0.0768551	0.70768	0.262856	0.446417	-1.01157	0.313077
-4.5544	-0.54464	0.0692805	1.09324	0.47442	0.763213	-0.799889	-0.0682354	0.561638	-0.111547	0.413345	-0.12955	0.164509	0.331246	0.175794	0.272235	0.732827	0.0772457	0.707845	0.263405	0.44632	-1.01134	0.31283
-4.55392	-0.543806	0.0694345	1.09239	0.475534	0.763494	-0.799917	-0.0677957	0.561691	-0.111853	0.413286	-0.12985	0.1649	0.331024	0.175258	0.272067	0.732598	0.0774132	0.7082	0.263125	0.44615	-1.01194	0.312535
-4.55344	-0.544041	0.0698519	1.09211	0.475608	0.76441	-0.8012	-0.0679143	0.561603	-0.111342	0.412888	-0.130188	0.165353	0.331015	0.175034	0.271361	0.732584	0.077561	0.708782	0.263101	0.446472	-1.01201	0.312328
-4.55296	-0.545453	0.0704143	1.09168	0.475233	0.765024	-0.800002	-0.0671883	0.561477	-0.110976	0.412309	-0.129719	0.164493	0.330848	0.174873	0.27081	0.732952	0.0776254	0.709359	0.263236	0.44616	-1.01238	0.311929
-4.55248	-0.546068	0.0705334	1.09117	0.475242	0.765626	-0.799764	-0.067087	0.561206	-0.110156	0.412338	-0.129792	0.164141	0.330801	0.174858	0.270502	0.732566	0.0778535	0.709918	0.263678	0.445714	-1.01174	0.311575
-4.552	-0.545396	0.0710473	1.09072	0.474669	0.766346	-0.801833	-0.0668503	0.561017	-0.109755	0.412452	-0.129693	0.164644	0.330716	0.175095	0.269989	0.732651	0.0782486	0.710648	0.263906	0.445605	-1.01274	0.311164
-4.55152	-0.545449	0.0715191	1.08978	0.475039	0.767056	-0.802262	-0.0669115	0.560847	-0.108544	0.412618	-0.129272	0.164247	0.330853	0.175197	0.269875	0.732522	0.0788354	0.711113	0.264365	0.44541	-1.01288	0.310438
-4.55104	-0.544846	0.0715393	1.08977	0.47599	0.767942	-0.802035	-0.066734	0.560726	-0.107954	0.412395	-0.129932	0.163837	0.331161	0.176013	0.27002	0.732203	0.0789715	0.711645	0.264296	0.445692	-1.01352	0.310034
-4.55056	-0.545003	0.0719467	1.08969	0.476421	0.768565	-0.803138	-0.0662097	0.560786	-0.106993	0.412196	-0.130839	0.163783	0.331342	0.176027	0.270349	0.732092	0.0793589	0.711944	0.264294	0.445866	-1.01342	0.309536
-4.55008	-0.544986	0.071966	1.08937	0.475727	0.768939	-0.804913	-0.0659574	0.560834	-0.106883	0.412304	-0.129794	0.163283	0.331273	0.176222	0.270603	0.732059	0.0794516	0.712246	0.264793	0.445753	-1.01358	0.309107
-4.5496	-0.543503	0.0720991	1.08904	0.476103	0.769448	-0.804361	-0.0659352	0.56127	-0.106106	0.412395	-0.129122	0.163249	0.331	0.176554	0.270727	0.732189	0.0795503	0.712567	0.264843	0.445397	-1.01367	0.308736
-4.54912	-0.542986	0.0725835	1.08928	0.476669	0.77008	-0.80313	-0.0660205	0.561255	-0.104774	0.412609	-0.128332	0.163198	0.330619	0.176399	0.27093	0.732195	0.0799066	0.712569	0.265159	0.445482	-1.01371	0.308548
-4.54864	-0.542602	0.0727436	1.08929	0.477479	0.770498	-0.804186	-0.0654352	0.561168	-0.104338	0.412195	-0.129105	0.163106	0.331067	0.176299	0.271529	0.732506	0.0801494	0.712883	0.265138	0.445614	-1.01377	0.308214
-4.54816	-0.543074	0.0729785	1.08908	0.477718	0.7715	-0.805059	-0.0653174	0.56115	-0.103065	0.412034	-0.129079	0.163443	0.331022	0.176583	0.271732	0.732569	0.0807149	0.713097	0.264822	0.44518	-1.01354	0.307472
-4.54768	-0.543322	0.0733657	1.08847	0.477709	0.772233	-0.805386	-0.0651092	0.561001	-0.103062	0.411768	-0.129785	0.1636	0.33086	0.176422	0.27199	0.732862	0.0810012	0.713567	0.264888	0.445352	-1.0134	0.307065
-4.5472	-0.542955	0.0740899	1.08823	0.477955	0.773324	-0.805763	-0.0645574	0.561054	-0.102405	0.412143	-0.130173	0.163579	0.330532	0.176898	0.272125	0.732755	0.0812302	0.71398	0.264847	0.445127	-1.01306	0.306494
-4.54672	-0.542356	0.0739055	1.08911	0.477858	0.77396	-0.808022	-0.0640856	0.56115	-0.101463	0.412471	-0.131062	0.163179	0.329944	0.177774	0.272072	0.732391	0.0812813	0.714239	0.265462	0.444834	-1.01291	0.305869
-4.54624	-0.541764	0.0743966	1.08936	0.477747	0.774514	-0.810649	-0.063915	0.561196	-0.101219	0.412713	-0.131824	0.16211	0.329598	0.177808	0.272273	0.73258	0.0817368	0.714693	0.2653	0.444545	-1.01221	0.305443
-4.54576	-0.541439	0.0749545	1.08852	0.477327	0.775268	-0.811308	-0.0637856	0.56103	-0.101178	0.41319	-0.131515	0.161585	0.329371	0.178504	0.272057	0.732662	0.0816998	0.715268	0.265541	0.444254	-1.01172	0.305296
-4.54528	-0.541133	0.0751893	1.08738	0.477031	0.775864	-0.812088	-0.0637679	0.561187	-0.101093	0.413837	-0.131153	0.161006	0.329458	0.178602	0.272151	0.732244	0.0818769	0.715643	0.265549	0.443625	-1.0114	0.304981
-4.5448	-0.541175	0.0752904	1.08725	0.477049	0.775999	-0.81374	-0.0632422	0.56122	-0.100025	0.414445	-0.129296	0.160239	0.328992	0.178539	0.272129	0.732326	0.0822579	0.71675	0.265366	0.44347	-1.01105	0.305169
-4.54432	-0.54169	0.0758605	1.0871	0.476605	0.776658	-0.814704	-0.0632114	0.561371	-0.0995787	0.414416	-0.129331	0.159816	0.328555	0.178824	0.272128	0.732377	0.08239	0.717076	0.265255	0.443338	-1.0109	0.304974
-4.54384	-0.541142	0.0766475	1.08696	0.477041	0.776771	-0.816885	-0.0635124	0.561437	-0.0992449	0.414991	-0.129946	0.159834	0.328505	0.178889	0.271928	0.731563	0.0823725	0.717801	0.265386	0.443552	-1.01058	0.305006
-4.54336	-0.54101	0.0768443	1.08649	0.477474	0.776953	-0.817228	-0.0634814	0.561549	-0.0991416	0.415395	-0.129711	0.159519	0.32813	0.179168	0.271572	0.731308	0.0825446	0.717841	0.265741	0.443789	-1.01016	0.305198
-4.54288	-0.540363	0.0776557	1.08622	0.477166	0.777305	-0.817973	-0.0628619	0.561549	-0.0987986	0.416183	-0.129941	0.159476	0.327179	0.179134	0.270985	0.731269	0.0829365	0.718357	0.265892	0.443615	-1.00992	0.304948
-4.5424	-0.540042	0.0775955	1.08584	0.476899	0.777587	-0.81904	-0.0626007	0.561589	-0.0988277	0.417277	-0.130962	0.159348	0.326533	0.178795	0.270859	0.731099	0.082775	0.719208	0.266251	0.443554	-1.00946	0.304695
-4.54192	-0.539487	0.0781038	1.08616	0.476949	0.777822	-0.820518	-0.0625396	0.561397	-0.0982591	0.417755	-0.130573	0.159344	0.326386	0.1789	0.27072	0.730809	0.0825496	0.719316	0.266114	0.443764	-1.00952	0.304443
-4.54144	-0.539539	0.0788697	1.08526	0.477359	0.778225	-0.820891	-0.0619808	0.561482	-0.0971714	0.417939	-0.129145	0.159242	0.326014	0.178467	0.270959	0.730971	0.0825438	0.720209	0.266517	0.443205	-1.00983	0.30375
-4.54096	-0.540178	0.0787357	1.08463	0.47728	0.779111	-0.82074	-0.062165	0.561672	-0.0972006	0.41858	-0.129156	0.15932	0.325594	0.178604	0.270801	0.731177	0.0824731	0.720885	0.266952	0.442837	-1.00993	0.303566
-4.54048	-0.540195	0.0793049	1.08436	0.477612	0.780024	-0.820691	-0.0620396	0.56159	-0.0971314	0.419305	-0.129417	0.158639	0.325285	0.178788	0.270211	0.731263	0.0828564	0.721371	0.266812	0.442189	-1.0105	0.303439
-4.54	-0.540846	0.0791719	1.08409	0.477492	0.78044	-0.82218	-0.0619954	0.561726	-0.0963287	0.419861	-0.129685	0.158295	0.324921	0.178666	0.269438	0.731135	0.0827757	0.721645	0.266531	0.442017	-1.01033	0.303244
-4.53952	-0.541809	0.0789227	1.08414	0.477189	0.781036	-0.822403	-0.0617634	0.561764	-0.0951677	0.420159	-0.130444	0.158609	0.324684	0.178663	0.268839	0.730874	0.0829787	0.721961	0.266457	0.441735	-1.01041	0.302841
-4.53904	-0.54297	0.0793834	1.08344	0.477328	0.780936	-0.82305	-0.0623996	0.561916	-0.0946908	0.419889	-0.129445	0.158342	0.324137	0.178336	0.268874	0.731516	0.0829561	0.722324	0.266637	0.441208	-1.01059	0.30249
-4.53856	-0.543087	0.0791313	1.08305	0.477028	0.781061	-0.823837	-0.0618708	0.562118	-0.0946049	0.42038	-0.128616	0.157782	0.323797	0.178074	0.268843	0.731611	0.0831454	0.72254	0.266883	0.441066	-1.0107	0.302504
-4.53808	-0.543913	0.0790018	1.08243	0.477764	0.781498	-0.82578	-0.0623236	0.562345	-0.0946022	0.420798	-0.129047	0.157735	0.323433	0.177947	0.268234	0.731723	0.0831762	0.722505	0.266834	0.440893	-1.01075	0.302237
-4.5376	-0.544327	0.0793011	1.08213	0.478533	0.78244	-0.825764	-0.062158	0.562768	-0.0933434	0.420761	-0.129259	0.157074	0.323139	0.177912	0.267819	0.731894	0.0832203	0.722451	0.266379	0.440672	-1.01052	0.302288
-4.53712	-0.544555	0.0785565	1.08203	0.478277	0.783064	-0.825884	-0.0619257	0.562956	-0.0933934	0.421008	-0.128984	0.156462	0.322909	0.178133	0.267694	0.732479	0.0833877	0.722168	0.266106	0.440397	-1.0104	0.302647
-4.53664	-0.544597	0.0791549	1.08157	0.478506	0.783007	-0.826192	-0.0619719	0.563033	-0.0934413	0.421418	-0.128961	0.156344	0.322358	0.178181	0.266645	0.732686	0.0835681	0.722274	0.266123	0.439978	-1.01071	0.302796
-4.53616	-0.544349	0.0795547	1.0817	0.478986	0.783829	-0.825586	-0.0622659	0.563107	-0.0927138	0.421633	-0.130588	0.155503	0.322123	0.177993	0.266151	0.732525	0.0839802	0.722431	0.266539	0.439547	-1.01077	0.302986
-4.53568	-0.5442	0.0799778	1.08128	0.478874	0.783774	-0.827111	-0.0625239	0.563197	-0.092419	0.421731	-0.132422	0.154983	0.321706	0.178791	0.266257	0.732568	0.084179	0.722617	0.266612	0.439484	-1.01095	0.302823
-4.5352	-0.544453	0.0804369	1.0808	0.478555	0.785043	-0.826482	-0.0625767	0.563347	-0.0915508	0.421743	-0.132539	0.154267	0.321789	0.178637	0.265911	0.73259	0.0840125	0.722809	0.266573	0.439064	-1.01097	0.302371
-4.53472	-0.545007	0.0808914	1.08063	0.478068	0.785568	-0.826932	-0.0618974	0.563374	-0.0914113	0.421957	-0.132558	0.153394	0.321435	0.17852	0.265431	0.732788	0.0841002	0.723215	0.26684	0.439104	-1.01083	0.302237
-4.53424	-0.544356	0.0811011	1.08091	0.478917	0.785931	-0.828088	-0.0621345	0.563273	-0.0919538	0.422401	-0.133203	0.152782	0.321149	0.178638	0.265169	0.733374	0.0843087	0.723328	0.267289	0.438831	-1.01081	0.302254
-4.53376	-0.544059	0.0806582	1.08123	0.479006	0.786631	-0.828409	-0.0620331	0.563287	-0.0917891	0.42306	-0.133423	0.152705	0.320755	0.178499	0.265144	0.733507	0.0844241	0.723347	0.266787	0.438778	-1.01078	0.302595
-4.53328	-0.543681	0.0812155	1.08117	0.479593	0.787271	-0.828683	-0.061859	0.563161	-0.0909934	0.4233	-0.134211	0.152499	0.320333	0.178484	0.264403	0.733565	0.0843153	0.723483	0.266822	0.438538	-1.01104	0.30259
-4.5328	-0.543918	0.0814011	1.0804	0.48051	0.787524	-0.82977	-0.0621374	0.563147	-0.0915042	0.423247	-0.13278	0.152165	0.320065	0.178286	0.264484	0.734064	0.0845792	0.723443	0.267142	0.438572	-1.01191	0.302834
-4.53232	-0.54394	0.0823237	1.08027	0.479693	0.787773	-0.829548	-0.0618012	0.563058	-0.0913433	0.423892	-0.133209	0.151587	0.31969	0.17856	0.264695	0.733778	0.0844109	0.723471	0.266574	0.438482	-1.01209	0.303136
-4.53184	-0.544704	0.0822669	1.08058	0.479812	0.788087	-0.828688	-0.061229	0.563213	-0.0914891	0.424501	-0.13293	0.151372	0.319339	0.178349	0.264213	0.733424	0.084464	0.724016	0.266393	0.438396	-1.0122	0.303307
-4.53136	-0.545206	0.0823193	1.08115	0.479715	0.78853	-0.829398	-0.0615465	0.563384	-0.0921369	0.424932	-0.133079	0.150999	0.318778	0.178388	0.263869	0.733744	0.0845403	0.724247	0.266444	0.438119	-1.01238	0.303335
-4.53088	-0.545058	0.082372	1.08105	0.478359	0.788942	-0.829303	-0.0612848	0.563553	-0.0912663	0.424691	-0.133104	0.150006	0.318558	0.178183	0.264077	0.734805	0.0844287	0.724236	0.26642	0.437821	-1.01275	0.303053
-4.5304	-0.545669	0.0830542	1.08043	0.478898	0.789478	-0.831831	-0.061112	0.563463	-0.0908312	0.425444	-0.132952	0.149794	0.318428	0.178216	0.263496	0.735369	0.0846705	0.724059	0.266156	0.437691	-1.01261	0.302981
-4.52992	-0.545178	0.0834525	1.08036	0.479083	0.789949	-0.832398	-0.0608809	0.563474	-0.0913697	0.425552	-0.132543	0.14929	0.318166	0.178063	0.26336	0.736442	0.0847213	0.724258	0.265977	0.437474	-1.0123	0.302756
-4.52944	-0.546261	0.0844737	1.08097	0.479567	0.790273	-0.832361	-0.0609486	0.563364	-0.0922876	0.425894	-0.131646	0.148868	0.318102	0.17833	0.263094	0.736565	0.0845621	0.724205	0.265534	0.437051	-1.01241	0.302644
-4.52896	-0.546232	0.0850472	1.08031	0.480034	0.7906	-0.833162	-0.0606396	0.563387	-0.0924433	0.426058	-0.132028	0.148583	0.318229	0.178153	0.26315	0.736172	0.0846027	0.724349	0.265462	0.436451	-1.01309	0.30245
-4.52848	-0.54701	0.0853154	1.07986	0.480688	0.791044	-0.832022	-0.0605558	0.563441	-0.092396	0.426795	-0.132211	0.148371	0.318062	0.17805	0.263297	0.736936	0.0845252	0.724886	0.265105	0.43647	-1.01327	0.302098
-4.528	-0.547727	0.0853153	1.07926	0.48062	0.79176	-0.833889	-0.0608752	0.563575	-0.092692	0.427636	-0.13248	0.147547	0.318223	0.177774	0.263264	0.736772	0.0848884	0.725196	0.264837	0.436463	-1.01333	0.301791
-4.52752	-0.548266	0.0854465	1.07923	0.481731	0.792392	-0.832452	-0.0608906	0.56368	-0.0924898	0.428374	-0.132379	0.147454	0.317893	0.177302	0.262457	0.737224	0.0851284	0.725545	0.264455	0.436346	-1.01361	0.302058
-4.52704	-0.548811	0.0860666	1.07877	0.481241	0.792788	-0.831833	-0.0603526	0.563815	-0.0933173	0.42876	-0.130622	0.14711	0.317586	0.176739	0.262433	0.737648	0.0851107	0.725909	0.264418	0.436561	-1.01454	0.301765
-4.52656	-0.549078	0.0868987	1.07798	0.481495	0.793729	-0.830809	-0.0604076	0.56391	-0.0941378	0.429116	-0.12971	0.146656	0.317597	0.176847	0.26244	0.737646	0.0850947	0.72627	0.264449	0.436522	-1.01423	0.301474
-4.52608	-0.549187	0.0877002	1.07709	0.481772	0.794103	-0.830777	-0.060518	0.563951	-0.0940607	0.429541	-0.128402	0.146548	0.317542	0.176935	0.262943	0.737858	0.0851005	0.726542	0.264334	0.43622	-1.01445	0.301362
-4.5256	-0.549712	0.087581	1.07682	0.481635	0.793299	-0.829643	-0.0609337	0.564001	-0.0950936	0.430124	-0.12673	0.145829	0.317643	0.176747	0.26275	0.738262	0.0853978	0.726796	0.263866	0.435946	-1.01424	0.301349
-4.52512	-0.550614	0.0876925	1.07633	0.481223	0.793365	-0.828296	-0.0615292	0.563824	-0.0956982	0.430548	-0.125926	0.144832	0.317773	0.176722	0.262677	0.73873	0.0855205	0.726823	0.263664	0.43592	-1.01407	0.301209
-4.52464	-0.550826	0.0883956	1.07649	0.480793	0.793448	-0.827352	-0.0616351	0.563857	-0.096815	0.430723	-0.125439	0.144323	0.317703	0.176547	0.262951	0.738394	0.0854755	0.72691	0.263636	0.435707	-1.01387	0.300767
-4.52416	-0.551974	0.0885167	1.07629	0.479929	0.792951	-0.828716	-0.0618416	0.564049	-0.0970321	0.431363	-0.124359	0.143911	0.317899	0.176757	0.26298	0.738803	0.0856511	0.726918	0.263835	0.435557	-1.01396	0.300946
-4.52368	-0.552205	0.0890244	1.07585	0.478098	0.793552	-0.829073	-0.0617409	0.564333	-0.0970856	0.431483	-0.123655	0.14301	0.317765	0.176373	0.262761	0.73919	0.0857136	0.726725	0.263861	0.435189	-1.01429	0.30073
-4.5232	-0.553209	0.0887563	1.07578	0.476887	0.794539	-0.827998	-0.062091	0.564567	-0.0973404	0.43212	-0.121862	0.142356	0.317189	0.176239	0.262614	0.739286	0.0857697	0.726855	0.263449	0.43513	-1.01374	0.300931
-4.52272	-0.553102	0.0893696	1.07461	0.474973	0.794973	-0.827696	-0.0625495	0.564661	-0.0971047	0.432728	-0.121029	0.141589	0.316957	0.176054	0.262365	0.739476	0.0860301	0.726999	0.263163	0.434654	-1.01372	0.300925
-4.52224	-0.5533	0.0892769	1.07457	0.474446	0.795596	-0.828201	-0.0625829	0.564733	-0.0974049	0.433257	-0.120088	0.141087	0.316668	0.17607	0.262439	0.739896	0.0862965	0.727174	0.262796	0.435042	-1.0137	0.301044
-4.52176	-0.553804	0.0896465	1.07471	0.474782	0.796293	-0.826666	-0.0624134	0.564859	-0.0981846	0.4337	-0.119444	0.140858	0.316484	0.176176	0.262086	0.739931	0.0862457	0.727525	0.262853	0.435184	-1.01434	0.300999
-4.52128	-0.554224	0.0901417	1.07471	0.475	0.79657	-0.827169	-0.0629267	0.564955	-0.0982916	0.433572	-0.119176	0.140718	0.316305	0.176027	0.262213	0.740102	0.0859507	0.727886	0.262552	0.434873	-1.01373	0.300609
-4.5208	-0.554428	0.0897435	1.07508	0.475287	0.797132	-0.82926	-0.0631715	0.565099	-0.0980536	0.433735	-0.118707	0.140486	0.316023	0.175988	0.261913	0.74021	0.086096	0.727581	0.262725	0.435086	-1.01315	0.300544
-4.52032	-0.555086	0.0898765	1.07586	0.47485	0.797391	-0.830074	-0.0631504	0.56527	-0.0981418	0.433923	-0.117325	0.140155	0.315946	0.176386	0.261796	0.739687	0.0862582	0.728143	0.262539	0.434832	-1.0136	0.300147
-4.51984	-0.555225	0.0902078	1.07554	0.47448	0.797739	-0.83012	-0.0633311	0.565462	-0.0990892	0.43438	-0.116539	0.139838	0.316056	0.176394	0.261073	0.739911	0.0861571	0.728445	0.262475	0.434853	-1.01366	0.299777
-4.51936	-0.555579	0.0903383	1.0762	0.474049	0.798452	-0.83012	-0.0634135	0.565781	-0.0983527	0.435129	-0.115342	0.139581	0.316053	0.17656	0.261713	0.740132	0.0863335	0.729117	0.262616	0.434636	-1.01366	0.299762
-4.51888	-0.555582	0.0904487	1.07595	0.474043	0.798747	-0.830987	-0.0635665	0.566006	-0.098177	0.435803	-0.115608	0.139355	0.316043	0.176108	0.261579	0.739914	0.0864019	0.729223	0.262484	0.434762	-1.01432	0.299876
-4.5184	-0.55595	0.0909618	1.0759	0.473612	0.799329	-0.831401	-0.0635664	0.56625	-0.0989221	0.436335	-0.115137	0.138916	0.315711	0.175962	0.261529	0.740204	0.0863196	0.729613	0.262546	0.43511	-1.01461	0.299717
-4.51792	-0.555688	0.0904414	1.07487	0.473223	0.799682	-0.832826	-0.0640046	0.566476	-0.0990174	0.436945	-0.114731	0.13793	0.315717	0.175845	0.261057	0.740397	0.086385	0.730377	0.262546	0.435073	-1.01459	0.299476
-4.51744	-0.555022	0.0902189	1.07502	0.471425	0.800318	-0.833848	-0.0642801	0.566648	-0.0998463	0.437257	-0.114343	0.137125	0.315759	0.175602	0.261301	0.741407	0.0862848	0.730578	0.262619	0.434799	-1.01467	0.29919
-4.51696	-0.554008	0.0902893	1.07452	0.47093	0.801029	-0.835584	-0.0647216	0.566655	-0.0992226	0.43819	-0.113539	0.136477	0.315875	0.175475	0.261135	0.741328	0.0862519	0.730744	0.262638	0.434814	-1.01499	0.299215
-4.51648	-0.553652	0.0904632	1.07488	0.47159	0.801958	-0.836055	-0.0648529	0.566751	-0.0998413	0.438432	-0.114149	0.135923	0.315807	0.175192	0.261079	0.741856	0.086177	0.730795	0.262769	0.435123	-1.01539	0.299155
-4.516	-0.55327	0.0905045	1.07462	0.470594	0.802599	-0.837825	-0.0649582	0.567129	-0.100325	0.438928	-0.114668	0.135547	0.316009	0.175453	0.26099	0.742156	0.0859435	0.730485	0.262627	0.435201	-1.01638	0.298806
-4.51552	-0.552724	0.0908144	1.07476	0.469983	0.802678	-0.837653	-0.0654029	0.567473	-0.100514	0.439097	-0.11389	0.135076	0.316212	0.175465	0.260847	0.742097	0.0856351	0.730898	0.262813	0.435274	-1.01668	0.298243
-4.51504	-0.552254	0.0906372	1.07429	0.470038	0.802731	-0.840285	-0.065812	0.567802	-0.100529	0.439379	-0.114172	0.134595	0.316163	0.175693	0.260694	0.741748	0.0857597	0.731008	0.263136	0.435187	-1.01723	0.298235
-4.51456	-0.551893	0.0909025	1.07407	0.469398	0.802759	-0.84191	-0.0665641	0.568241	-0.0998036	0.439066	-0.113786	0.134376	0.316105	0.175211	0.26079	0.741709	0.0857446	0.731324	0.262686	0.435145	-1.01792	0.298363
-4.51408	-0.551793	0.0905988	1.07369	0.467322	0.803383	-0.842928	-0.0669345	0.568431	-0.100482	0.439727	-0.113704	0.133978	0.315849	0.17473	0.26074	0.742028	0.0856235	0.731325	0.2627	0.435107	-1.01815	0.298421
-4.5136	-0.551489	0.0906229	1.07385	0.467648	0.803962	-0.846034	-0.066803	0.56877	-0.100286	0.440323	-0.114256	0.133541	0.315785	0.174967	0.260248	0.742688	0.0855851	0.73125	0.262517	0.435298	-1.0179	0.298153
-4.51312	-0.552132	0.0907663	1.07394	0.467925	0.804656	-0.84683	-0.0669947	0.56914	-0.100742	0.440598	-0.114994	0.13361	0.315815	0.17475	0.259824	0.742884	0.0856142	0.731841	0.262191	0.435192	-1.01771	0.29816
-4.51264	-0.551677	0.090895	1.07359	0.467393	0.805238	-0.846182	-0.0677242	0.569353	-0.100222	0.441129	-0.115023	0.133422	0.316028	0.174912	0.259353	0.743015	0.0855278	0.732692	0.261885	0.435401	-1.01811	0.297928
-4.51216	-0.551748	0.0909906	1.07296	0.467548	0.806305	-0.84578	-0.0682515	0.569538	-0.100024	0.441076	-0.11538	0.133521	0.316054	0.175493	0.259003	0.743359	0.0856673	0.73298	0.261727	0.435533	-1.01854	0.298108
-4.51168	-0.552484	0.0915031	1.07233	0.467049	0.807263	-0.845788	-0.0686589	0.569749	-0.100126	0.441389	-0.114967	0.133964	0.316292	0.175347	0.258487	0.743464	0.085743	0.733561	0.261694	0.435277	-1.01762	0.298112
-4.5112	-0.553082	0.0920996	1.07239	0.467146	0.807844	-0.845343	-0.0685325	0.569854	-0.10011	0.441778	-0.114944	0.133825	0.316042	0.175185	0.25807	0.74378	0.0858952	0.733877	0.261794	0.435237	-1.01766	0.298002
-4.51072	-0.553482	0.0924796	1.07252	0.466559	0.808282	-0.845826	-0.0690081	0.570161	-0.100134	0.441718	-0.115447	0.133735	0.315997	0.174833	0.258332	0.744782	0.0857276	0.733979	0.261751	0.434646	-1.01711	0.297813
-4.51024	-0.553366	0.0923655	1.07283	0.466479	0.80944	-0.847983	-0.0694255	0.570256	-0.099521	0.44203	-0.116356	0.133557	0.31572	0.175068	0.257878	0.744951	0.0854703	0.73403	0.261642	0.434682	-1.01704	0.297785
-4.50976	-0.55402	0.0928632	1.07271	0.466065	0.810152	-0.849385	-0.0705161	0.570441	-0.0993103	0.442316	-0.116155	0.133227	0.315255	0.175126	0.25816	0.745193	0.0850319	0.733969	0.261486	0.434747	-1.01706	0.297713
-4.50928	-0.554473	0.0934242	1.07224	0.465496	0.811164	-0.848809	-0.0707554	0.570761	-0.0996279	0.442379	-0.117966	0.132674	0.315083	0.175366	0.257978	0.745257	0.0847992	0.734215	0.260784	0.434667	-1.01732	0.297759
-4.5088	-0.555498	0.0931487	1.07234	0.465862	0.811576	-0.849104	-0.072113	0.570891	-0.0992787	0.442526	-0.119319	0.133119	0.315199	0.175094	0.258004	0.744982	0.0846406	0.734227	0.260188	0.434618	-1.01738	0.297655
-4.50832	-0.556011	0.0936135	1.07125	0.466339	0.811967	-0.850068	-0.0719701	0.571066	-0.0995155	0.442412	-0.120679	0.132393	0.315557	0.175035	0.25829	0.744882	0.0844856	0.734324	0.259759	0.434709	-1.01751	0.29797
-4.50784	-0.555822	0.0935685	1.07056	0.46526	0.812091	-0.850548	-0.0728871	0.571125	-0.0989101	0.443146	-0.121329	0.131674	0.315509	0.175126	0.257768	0.744989	0.0843534	0.734699	0.259464	0.433696	-1.0175	0.298272
-4.50736	-0.55573	0.093911	1.07096	0.465165	0.812737	-0.850774	-0.0732467	0.571341	-0.0979144	0.443161	-0.121032	0.131586	0.315828	0.175934	0.257221	0.745341	0.0843582	0.734981	0.259384	0.433466	-1.01704	0.298291
-4.50688	-0.555415	0.0943632	1.07102	0.465043	0.813027	-0.852021	-0.073445	0.571278	-0.0973874	0.443389	-0.121634	0.130862	0.316025	0.17631	0.257011	0.746241	0.0840622	0.735517	0.258828	0.433223	-1.01708	0.298001
-4.5064	-0.554666	0.0948805	1.07152	0.464463	0.813818	-0.851778	-0.0744468	0.571697	-0.097049	0.443274	-0.121617	0.130217	0.316151	0.175985	0.257016	0.746503	0.0837561	0.736029	0.258958	0.432622	-1.01694	0.297619
-4.50592	-0.554332	0.0954752	1.07171	0.464572	0.814479	-0.852248	-0.0744331	0.57208	-0.0965774	0.443576	-0.122174	0.129716	0.316473	0.176527	0.257249	0.746128	0.0836325	0.736466	0.258628	0.432454	-1.01684	0.297445
-4.50544	-0.553891	0.0955753	1.07134	0.465104	0.815133	-0.850254	-0.074417	0.572249	-0.0961964	0.44371	-0.12177	0.129273	0.316893	0.176778	0.257547	0.746253	0.0836286	0.736792	0.258688	0.432145	-1.01641	0.297693
-4.50496	-0.552993	0.0955096	1.07051	0.465291	0.815886	-0.850891	-0.0745939	0.572648	-0.0960908	0.443968	-0.122027	0.128695	0.317077	0.176873	0.256882	0.746323	0.0834404	0.736904	0.258292	0.431725	-1.01555	0.29728
-4.50448	-0.552617	0.0953934	1.06995	0.466005	0.81656	-0.850179	-0.0748034	0.572837	-0.0954353	0.443533	-0.123304	0.128012	0.317228	0.176888	0.255991	0.747329	0.0832772	0.737121	0.258587	0.431651	-1.0156	0.296885
-4.504	-0.552295	0.0954386	1.07006	0.466944	0.816895	-0.85133	-0.0751339	0.573102	-0.0955723	0.443332	-0.123502	0.127892	0.317335	0.177071	0.255331	0.747397	0.0830307	0.737903	0.258724	0.431059	-1.01518	0.296636
-4.50352	-0.55232	0.0957178	1.07021	0.467327	0.816931	-0.851725	-0.0752601	0.573372	-0.0947475	0.443687	-0.123002	0.127106	0.317688	0.177285	0.254914	0.747821	0.0829912	0.738623	0.258584	0.430496	-1.01512	0.296796
-4.50304	-0.551946	0.0955771	1.07054	0.466908	0.817724	-0.852347	-0.0758422	0.573721	-0.0943782	0.443671	-0.123145	0.126845	0.317565	0.177695	0.255593	0.748488	0.0830256	0.738896	0.258135	0.430215	-1.01508	0.296503
-4.50256	-0.55132	0.095592	1.07016	0.466552	0.817931	-0.85393	-0.0760459	0.574015	-0.0938303	0.443671	-0.124235	0.126782	0.317975	0.177728	0.25557	0.748911	0.0831556	0.739084	0.258193	0.429879	-1.0155	0.296173
-4.50208	-0.550903	0.0956908	1.07078	0.466176	0.818167	-0.85423	-0.0768821	0.574114	-0.0935947	0.44394	-0.124101	0.126186	0.318046	0.177662	0.255691	0.749178	0.0829484	0.73959	0.258227	0.429543	-1.0148	0.296355
-4.5016	-0.550293	0.0960247	1.07121	0.465675	0.818312	-0.85698	-0.0768566	0.574219	-0.0936453	0.443661	-0.124458	0.125332	0.318289	0.177645	0.255838	0.75048	0.0827889	0.73982	0.257996	0.429049	-1.01444	0.296402
-4.50112	-0.548977	0.0967528	1.07075	0.465979	0.818743	-0.858073	-0.0771122	0.574457	-0.0930589	0.443534	-0.124562	0.124802	0.318764	0.177618	0.254758	0.751578	0.0826212	0.739969	0.257934	0.4284	-1.01365	0.296106
-4.50064	-0.547454	0.0969628	1.07102	0.467268	0.819217	-0.859105	-0.0773339	0.574591	-0.0921694	0.442683	-0.124136	0.124733	0.318926	0.178364	0.254778	0.752007	0.0823655	0.740014	0.257929	0.427675	-1.01354	0.296253
-4.50016	-0.546978	0.0974235	1.07098	0.467618	0.819542	-0.859939	-0.0777466	0.574784	-0.0925063	0.442203	-0.124326	0.124586	0.318929	0.178273	0.254461	0.752536	0.0824943	0.74017	0.258059	0.427404	-1.01341	0.295848
-4.49968	-0.546452	0.09789	1.07124	0.466863	0.819688	-0.861331	-0.0773793	0.574936	-0.0929926	0.442038	-0.123844	0.124239	0.319086	0.178538	0.253526	0.752429	0.0822361	0.739849	0.258149	0.427255	-1.01303	0.29609
-4.4992	-0.546077	0.098432	1.07166	0.466666	0.819768	-0.86173	-0.0778813	0.575194	-0.0921408	0.441751	-0.123897	0.123999	0.319395	0.178266	0.25327	0.752964	0.082167	0.740318	0.258038	0.426901	-1.01269	0.296121
-4.49872	-0.544816	0.0983982	1.07228	0.465928	0.820034	-0.863959	-0.0784021	0.575341	-0.0924291	0.441854	-0.123381	0.122753	0.319999	0.178383	0.253439	0.753472	0.0822312	0.740391	0.257894	0.426492	-1.01269	0.295863
-4.49824	-0.544686	0.0989566	1.07244	0.465227	0.820431	-0.863566	-0.0787887	0.575758	-0.0920737	0.44221	-0.122605	0.122036	0.320412	0.178689	0.252771	0.753677	0.0821919	0.740617	0.257971	0.426003	-1.01253	0.295892
-4.49776	-0.544212	0.0990017	1.07273	0.464906	0.820907	-0.864538	-0.0789569	0.5757	-0.0913235	0.442586	-0.122561	0.121755	0.320847	0.178887	0.252098	0.753819	0.0820178	0.7409	0.257877	0.425807	-1.01295	0.295743
-4.49728	-0.543068	0.0987156	1.07226	0.465054	0.82188	-0.865351	-0.0790662	0.575947	-0.0912851	0.442252	-0.12219	0.121256	0.321129	0.178591	0.251492	0.75457	0.0817648	0.741509	0.25817	0.425629	-1.01306	0.29549
-4.4968	-0.542934	0.0987213	1.0729	0.464995	0.82251	-0.866121	-0.0788207	0.576097	-0.0903328	0.442005	-0.121755	0.120369	0.321397	0.178897	0.251261	0.755069	0.0816715	0.742166	0.258068	0.425783	-1.01254	0.295278
-4.49632	-0.542528	0.0990275	1.07296	0.465386	0.82317	-0.866239	-0.0787859	0.576283	-0.0910023	0.441897	-0.121859	0.120673	0.321152	0.179214	0.251515	0.755925	0.0814919	0.742395	0.258348	0.425555	-1.0129	0.29502
-4.49584	-0.542687	0.0990847	1.07373	0.466443	0.823283	-0.865592	-0.0784163	0.576551	-0.0907783	0.441503	-0.121332	0.120108	0.321019	0.18004	0.250767	0.75699	0.0812461	0.743059	0.25827	0.42592	-1.01271	0.294946
-4.49536	-0.543077	0.0991471	1.07442	0.46673	0.823573	-0.865716	-0.078915	0.576697	-0.0911699	0.441571	-0.121661	0.119892	0.321115	0.180175	0.250559	0.756922	0.0809382	0.743398	0.258499	0.425702	-1.01342	0.295055
-4.49488	-0.543014	0.0995103	1.07451	0.468296	0.824078	-0.866502	-0.0789615	0.576758	-0.0911614	0.44117	-0.120198	0.119646	0.321117	0.180571	0.250323	0.757287	0.0807688	0.743516	0.258532	0.425786	-1.01345	0.295354
-4.4944	-0.543587	0.0997777	1.07517	0.468742	0.824717	-0.866538	-0.0794678	0.577069	-0.0915576	0.440642	-0.119429	0.118817	0.321492	0.180921	0.249413	0.757606	0.0806529	0.744546	0.258381	0.426118	-1.01344	0.295559
-4.49392	-0.543506	0.0998928	1.07647	0.469466	0.825373	-0.866494	-0.0791416	0.577248	-0.092013	0.440409	-0.119112	0.118426	0.321835	0.181267	0.249673	0.757745	0.0803724	0.744842	0.257793	0.425957	-1.01359	0.295571
-4.49344	-0.543372	0.0997953	1.07645	0.46958	0.826162	-0.867017	-0.079245	0.577349	-0.092149	0.44053	-0.119104	0.118608	0.32225	0.181252	0.249702	0.758071	0.0803311	0.74501	0.257482	0.425664	-1.0141	0.295175
-4.49296	-0.543204	0.0993758	1.07653	0.470167	0.826696	-0.867715	-0.0789685	0.577582	-0.0917704	0.440527	-0.118416	0.118391	0.322358	0.181713	0.249958	0.759158	0.0801288	0.744974	0.257356	0.425676	-1.01429	0.294949
-4.49248	-0.542592	0.0991254	1.0768	0.470714	0.827442	-0.868027	-0.0789373	0.577711	-0.0922117	0.439588	-0.117672	0.118244	0.322644	0.182111	0.249765	0.759957	0.0801072	0.745724	0.257267	0.425367	-1.01464	0.295026
-4.492	-0.541732	0.099246	1.07753	0.470996	0.827529	-0.868431	-0.0787822	0.577891	-0.0920494	0.438734	-0.116899	0.118178	0.322641	0.182288	0.250532	0.760141	0.0797357	0.746222	0.257363	0.425576	-1.01497	0.294984
-4.49152	-0.54162	0.0996211	1.07808	0.471307	0.827855	-0.869014	-0.0785467	0.57799	-0.0916397	0.438642	-0.116515	0.118147	0.322799	0.182357	0.250726	0.760539	0.0796012	0.746423	0.256911	0.425385	-1.01525	0.294953
-4.49104	-0.542465	0.0998641	1.07828	0.471781	0.828647	-0.868339	-0.0784403	0.578165	-0.0917787	0.439028	-0.116298	0.117821	0.322732	0.182905	0.250869	0.761248	0.0796285	0.74701	0.256902	0.425444	-1.01553	0.294705
-4.49056	-0.54382	0.0993083	1.07909	0.47171	0.829395	-0.868954	-0.0779284	0.57846	-0.0913435	0.43895	-0.11512	0.117377	0.322875	0.182835	0.250529	0.762258	0.0791226	0.747847	0.256926	0.425288	-1.01532	0.294712
-4.49008	-0.54434	0.0991244	1.07895	0.470639	0.830168	-0.869091	-0.0781162	0.578641	-0.0917887	0.4387	-0.115082	0.117655	0.322933	0.182836	0.250571	0.762697	0.0789309	0.748501	0.256868	0.425258	-1.01518	0.29481
-4.4896	-0.5447	0.0989412	1.07882	0.470272	0.830669	-0.868483	-0.0781141	0.578967	-0.0916175	0.438622	-0.115167	0.117874	0.323194	0.182917	0.250592	0.763844	0.0787081	0.749064	0.256369	0.425145	-1.01513	0.294629
-4.48912	-0.54548	0.099238	1.07939	0.470372	0.831523	-0.869608	-0.0779137	0.579235	-0.0921744	0.438989	-0.113916	0.11756	0.323584	0.183166	0.250373	0.764104	0.0786932	0.749454	0.25616	0.425112	-1.01541	0.294592
-4.48864	-0.545997	0.099414	1.0796	0.470532	0.832339	-0.87015	-0.078134	0.579434	-0.09283	0.43921	-0.113766	0.117584	0.323667	0.182817	0.250494	0.764389	0.0785374	0.749759	0.256351	0.424664	-1.01559	0.294412
-4.48816	-0.545409	0.0998599	1.07939	0.470457	0.833074	-0.870935	-0.0780786	0.579524	-0.0931361	0.439134	-0.113274	0.118227	0.32363	0.183422	0.250822	0.765067	0.0784126	0.750107	0.256081	0.42448	-1.01539	0.294321
-4.48768	-0.546231	0.100032	1.0796	0.470786	0.833943	-0.871544	-0.0770809	0.57981	-0.0925936	0.439583	-0.112733	0.118514	0.32369	0.183631	0.250785	0.765672	0.0782117	0.750552	0.255519	0.424301	-1.01548	0.294117
-4.4872	-0.546373	0.0999349	1.07902	0.470384	0.834212	-0.870076	-0.0770949	0.579976	-0.0925675	0.440002	-0.112481	0.118767	0.323866	0.184149	0.250326	0.766173	0.0781573	0.750775	0.255286	0.424228	-1.01528	0.294289
-4.48672	-0.547465	0.100289	1.07927	0.470448	0.834688	-0.869336	-0.0765036	0.580129	-0.0919628	0.440218	-0.11204	0.118372	0.324094	0.183887	0.250622	0.767125	0.077937	0.751155	0.255296	0.424025	-1.01466	0.294239
-4.48624	-0.547664	0.100375	1.07866	0.469952	0.835266	-0.870735	-0.0761546	0.580339	-0.0920716	0.440248	-0.111489	0.118849	0.324076	0.183638	0.251211	0.767175	0.077851	0.751787	0.255207	0.424078	-1.01456	0.294174
-4.48576	-0.548577	0.100004	1.07912	0.469514	0.836015	-0.872327	-0.0754236	0.580483	-0.0913754	0.440851	-0.110718	0.119284	0.324311	0.183614	0.25207	0.766728	0.0777907	0.751964	0.255046	0.424975	-1.01447	0.294439
-4.48528	-0.549482	0.100716	1.07885	0.46964	0.836688	-0.873088	-0.0748371	0.580625	-0.0916756	0.44116	-0.110009	0.119502	0.324432	0.183788	0.25198	0.767006	0.0780268	0.752245	0.255281	0.424792	-1.01396	0.294
-4.4848	-0.549301	0.101225	1.07928	0.469922	0.837076	-0.87343	-0.0743769	0.580644	-0.0914289	0.441715	-0.109213	0.119729	0.32414	0.183884	0.252406	0.76716	0.0781416	0.75268	0.254937	0.424683	-1.01383	0.294269
-4.48432	-0.550685	0.101466	1.0795	0.469348	0.83698	-0.875499	-0.0737473	0.580886	-0.0912024	0.441607	-0.109258	0.120328	0.323981	0.183638	0.252529	0.768035	0.0781326	0.753447	0.254639	0.424488	-1.0138	0.294014
-4.48384	-0.552502	0.101924	1.0797	0.470151	0.838218	-0.875471	-0.0732316	0.580921	-0.0918087	0.441378	-0.108792	0.120829	0.323972	0.184033	0.253288	0.7685	0.0781285	0.753913	0.254488	0.424343	-1.01386	0.294043
-4.48336	-0.553106	0.102476	1.07982	0.471637	0.838923	-0.875868	-0.0725899	0.580937	-0.0912152	0.441261	-0.108829	0.12037	0.32366	0.183896	0.25387	0.768853	0.0780661	0.754715	0.254764	0.424614	-1.01377	0.293862
-4.48288	-0.553512	0.102754	1.08041	0.472151	0.839492	-0.875357	-0.0720581	0.580848	-0.0906864	0.441212	-0.108322	0.119619	0.323869	0.184029	0.254186	0.769514	0.0781055	0.755565	0.254453	0.424608	-1.01336	0.293832
-4.4824	-0.554517	0.103209	1.07975	0.472091	0.840935	-0.875824	-0.071899	0.580937	-0.090715	0.441171	-0.107949	0.119346	0.323698	0.184138	0.254301	0.769471	0.0781279	0.755899	0.254378	0.424597	-1.01328	0.293356
-4.48192	-0.554627	0.103851	1.07967	0.47338	0.841974	-0.875677	-0.071096	0.581016	-0.090603	0.440545	-0.10809	0.118881	0.323519	0.184264	0.254359	0.770081	0.0779038	0.756402	0.254349	0.424489	-1.01335	0.292739
-4.48144	-0.55581	0.104779	1.07968	0.4733	0.842888	-0.875962	-0.0711788	0.581419	-0.0900057	0.440129	-0.107505	0.118694	0.323514	0.184703	0.253921	0.77138	0.0775319	0.756737	0.254717	0.424172	-1.01342	0.292159
-4.48096	-0.556376	0.105244	1.08002	0.473946	0.843925	-0.876714	-0.0711835	0.58174	-0.0897372	0.439933	-0.107609	0.118693	0.323693	0.185294	0.253793	0.772005	0.0773724	0.757266	0.254452	0.423991	-1.01357	0.292283
-4.48048	-0.556685	0.105497	1.07993	0.473459	0.844694	-0.876534	-0.0702442	0.582117	-0.0887861	0.439448	-0.108054	0.118146	0.324091	0.186097	0.253701	0.772532	0.077168	0.75788	0.254134	0.42407	-1.01369	0.29224
-4.48	-0.556404	0.106091	1.08023	0.474211	0.844975	-0.877708	-0.0694825	0.582289	-0.088551	0.439451	-0.107198	0.118449	0.324212	0.186485	0.253639	0.772767	0.0769242	0.758546	0.254183	0.424026	-1.0133	0.292177
-4.47952	-0.558354	0.106604	1.08118	0.474065	0.845734	-0.878072	-0.0692904	0.582516	-0.0883274	0.439212	-0.107603	0.118454	0.324244	0.187222	0.253074	0.77384	0.0768079	0.758959	0.25419	0.424405	-1.01244	0.292288
-4.47904	-0.558872	0.107648	1.08213	0.47529	0.846082	-0.879243	-0.0680702	0.582868	-0.0886018	0.438965	-0.107329	0.118316	0.324372	0.187643	0.253034	0.774467	0.076652	0.75915	0.254534	0.424777	-1.01263	0.292059
-4.47856	-0.558415	0.108325	1.08271	0.475779	0.846728	-0.879825	-0.0677536	0.582999	-0.0889025	0.438665	-0.10755	0.118513	0.324755	0.187685	0.253105	0.775145	0.0764862	0.759743	0.254642	0.42468	-1.01231	0.292076
-4.47808	-0.558654	0.108999	1.08263	0.475963	0.848005	-0.880522	-0.0672859	0.583149	-0.0896609	0.438443	-0.10812	0.118445	0.324695	0.188291	0.253615	0.775341	0.076211	0.760306	0.254416	0.42505	-1.01153	0.291857
-4.4776	-0.558943	0.109163	1.08214	0.476727	0.848835	-0.880772	-0.0667451	0.583326	-0.0894447	0.438472	-0.10842	0.118906	0.32476	0.188576	0.253834	0.776501	0.0761885	0.760528	0.254718	0.425639	-1.01113	0.29207
-4.47712	-0.55903	0.11023	1.08178	0.477031	0.84914	-0.88129	-0.0660667	0.58346	-0.0897416	0.43732	-0.108021	0.118714	0.325296	0.188994	0.253759	0.776941	0.075775	0.760905	0.254675	0.425529	-1.01039	0.291973
-4.47664	-0.558799	0.110786	1.08245	0.476894	0.849629	-0.882547	-0.0650975	0.583454	-0.0899708	0.436605	-0.107938	0.119238	0.325478	0.189684	0.253643	0.776626	0.0757044	0.761247	0.255015	0.425786	-1.00992	0.291936
-4.47616	-0.559399	0.111789	1.08228	0.478036	0.850468	-0.883124	-0.0648506	0.583655	-0.0903722	0.436587	-0.108164	0.119616	0.325428	0.189705	0.253753	0.776526	0.0753378	0.761498	0.255047	0.425944	-1.00927	0.291932
-4.47568	-0.560536	0.113018	1.08213	0.47882	0.850998	-0.883764	-0.0644179	0.584106	-0.0906032	0.436189	-0.107104	0.11952	0.325626	0.190191	0.253815	0.776785	0.0750592	0.761713	0.254781	0.426405	-1.00883	0.2917
-4.4752	-0.56099	0.113126	1.08195	0.478722	0.85107	-0.885724	-0.0642132	0.584325	-0.0903875	0.43577	-0.106299	0.119311	0.32599	0.190659	0.253634	0.776488	0.0749302	0.762443	0.255315	0.426499	-1.00866	0.291596
-4.47472	-0.561583	0.113473	1.08176	0.478962	0.852117	-0.886076	-0.0638061	0.584656	-0.0903758	0.435545	-0.106228	0.118956	0.32579	0.190788	0.253556	0.777126	0.0746682	0.762565	0.255405	0.426851	-1.00828	0.2912
-4.47424	-0.562287	0.114315	1.08189	0.480073	0.853147	-0.886507	-0.0640718	0.584993	-0.0894261	0.435711	-0.10558	0.118889	0.325871	0.191332	0.253505	0.777153	0.0743045	0.763103	0.255235	0.427013	-1.00803	0.290808
-4.47376	-0.562315	0.114584	1.0823	0.480818	0.854077	-0.886625	-0.0640252	0.585276	-0.0887163	0.435525	-0.105204	0.119057	0.326272	0.191598	0.253382	0.777003	0.0740632	0.763869	0.254964	0.427126	-1.00697	0.290585
-4.47328	-0.563425	0.115767	1.08256	0.481918	0.855569	-0.887504	-0.0637648	0.585443	-0.0885478	0.435104	-0.104939	0.118922	0.326691	0.191513	0.253455	0.777744	0.0741383	0.764301	0.255105	0.427525	-1.00649	0.290498
-4.4728	-0.563787	0.11654	1.08306	0.481542	0.856803	-0.887965	-0.0637703	0.585678	-0.088456	0.434953	-0.103658	0.11918	0.326583	0.191666	0.253368	0.778038	0.0741477	0.765014	0.254965	0.427187	-1.006	0.290286
-4.47232	-0.56419	0.11747	1.08372	0.482434	0.857696	-0.889362	-0.0638782	0.585952	-0.0884507	0.43453	-0.102327	0.119331	0.326871	0.192004	0.253586	0.778851	0.073816	0.765547	0.254733	0.427529	-1.00562	0.289917
-4.47184	-0.564082	0.118401	1.08428	0.483824	0.858788	-0.889815	-0.0639357	0.586233	-0.0886789	0.434083	-0.100815	0.118894	0.326977	0.192401	0.253524	0.779173	0.0735085	0.76576	0.254619	0.427947	-1.00568	0.28962
-4.47136	-0.563854	0.118594	1.08475	0.484281	0.859632	-0.889192	-0.0639998	0.586767	-0.0887711	0.433836	-0.0996701	0.118532	0.327201	0.192683	0.253644	0.779461	0.0732752	0.766262	0.254801	0.428245	-1.00554	0.289464
-4.47088	-0.564382	0.120175	1.0851	0.484202	0.860605	-0.889988	-0.0636349	0.586754	-0.0893525	0.433219	-0.0995478	0.118071	0.327105	0.192752	0.25367	0.779684	0.0729647	0.766976	0.255038	0.428336	-1.00472	0.289149
-4.4704	-0.564369	0.120442	1.08576	0.484497	0.861277	-0.891285	-0.0639626	0.587215	-0.0895838	0.433473	-0.0985905	0.117727	0.327058	0.193035	0.253654	0.780398	0.0728216	0.767568	0.255201	0.428205	-1.00423	0.288838
-4.46992	-0.563709	0.120777	1.08513	0.485274	0.862396	-0.891863	-0.0636142	0.587367	-0.0896481	0.433731	-0.0973174	0.11751	0.327074	0.193654	0.25432	0.781113	0.0725834	0.768075	0.254954	0.428755	-1.00302	0.289046
-4.46944	-0.56263	0.120376	1.08553	0.486166	0.863106	-0.893474	-0.0635195	0.587839	-0.0892914	0.433617	-0.0970575	0.116851	0.327495	0.193681	0.25411	0.781213	0.0724649	0.768378	0.255123	0.428458	-1.00245	0.289118
-4.46896	-0.562323	0.120323	1.08539	0.486945	0.863709	-0.894086	-0.0635109	0.587914	-0.0887964	0.433168	-0.0981334	0.116013	0.327905	0.19377	0.253935	0.782173	0.0724393	0.768989	0.254726	0.428462	-1.00173	0.28903
-4.46848	-0.562251	0.120803	1.0856	0.487772	0.864485	-0.89383	-0.0632655	0.587977	-0.0882938	0.432998	-0.0974803	0.116216	0.328236	0.194449	0.254551	0.782957	0.0725689	0.769443	0.254705	0.428671	-1.00088	0.289116
-4.468	-0.56097	0.120912	1.08546	0.489082	0.865085	-0.893903	-0.0638767	0.588185	-0.0881335	0.433101	-0.0970867	0.115091	0.328217	0.194331	0.254281	0.783015	0.072442	0.769676	0.254742	0.428344	-0.999682	0.288781
-4.46752	-0.560713	0.121006	1.08536	0.489056	0.865508	-0.89368	-0.0643355	0.58855	-0.0876012	0.432829	-0.0970425	0.114231	0.32831	0.194525	0.254039	0.783284	0.0725635	0.769763	0.254256	0.428259	-0.999315	0.289003
-4.46704	-0.560721	0.121757	1.08486	0.490004	0.865983	-0.892489	-0.0638208	0.588624	-0.0876549	0.432325	-0.0958756	0.113876	0.328545	0.194362	0.254365	0.78355	0.0724459	0.77002	0.254067	0.428247	-0.998906	0.289448
-4.46656	-0.560987	0.122104	1.08458	0.490976	0.867054	-0.892308	-0.0641836	0.588601	-0.0876483	0.432393	-0.0946328	0.113052	0.328707	0.194313	0.255065	0.784131	0.0725163	0.770338	0.253503	0.428168	-0.998745	0.289325
-4.46608	-0.561657	0.123009	1.08361	0.491419	0.867698	-0.893284	-0.0639375	0.5886	-0.087314	0.432032	-0.0940121	0.112192	0.328872	0.194219	0.255178	0.784718	0.0723844	0.770493	0.25343	0.428113	-0.997626	0.289112
-4.4656	-0.562152	0.123011	1.08268	0.492478	0.86871	-0.892897	-0.064429	0.588494	-0.08707	0.432037	-0.0923557	0.112025	0.328801	0.193965	0.255533	0.784952	0.0722967	0.770788	0.253375	0.428034	-0.996763	0.289207
-4.46512	-0.562013	0.123022	1.08199	0.49316	0.869123	-0.893526	-0.0642283	0.58863	-0.0866646	0.432069	-0.0920249	0.111156	0.329077	0.194071	0.255979	0.785356	0.0723751	0.771	0.253173	0.428187	-0.994906	0.2893
-4.46464	-0.561696	0.123119	1.08138	0.494018	0.87018	-0.8935	-0.0637041	0.588624	-0.0857885	0.431575	-0.0909106	0.110643	0.329189	0.193412	0.256276	0.786653	0.0726643	0.771257	0.253147	0.428144	-0.994384	0.289157
-4.46416	-0.561785	0.123398	1.08115	0.495027	0.871103	-0.895007	-0.064108	0.588591	-0.0856829	0.431188	-0.0904853	0.110118	0.329519	0.193207	0.256325	0.786597	0.0728015	0.771985	0.253029	0.4282	-0.993903	0.289434
-4.46368	-0.561814	0.123322	1.08072	0.495255	0.871981	-0.894736	-0.0637167	0.58876	-0.0845685	0.430997	-0.0892937	0.108933	0.329466	0.193091	0.257103	0.787075	0.0729552	0.772101	0.253183	0.428704	-0.99303	0.289229
-4.4632	-0.560948	0.123505	1.08045	0.495874	0.872666	-0.894754	-0.063517	0.58895	-0.0840426	0.431085	-0.0891943	0.108412	0.3295	0.193571	0.257382	0.787302	0.0727983	0.772819	0.253256	0.428733	-0.992264	0.289146
-4.46272	-0.560589	0.123373	1.08107	0.496399	0.87354	-0.895913	-0.0630802	0.589053	-0.0840594	0.431007	-0.0886346	0.108278	0.329524	0.193216	0.257032	0.787674	0.0730049	0.773358	0.253253	0.428831	-0.991156	0.289105
-4.46224	-0.561434	0.123129	1.08076	0.496278	0.87435	-0.895715	-0.0629224	0.58918	-0.0840254	0.431428	-0.0881593	0.107923	0.329931	0.193745	0.256543	0.787832	0.0732022	0.773484	0.253623	0.429166	-0.989821	0.28879
-4.46176	-0.561276	0.123234	1.08046	0.496495	0.874955	-0.895291	-0.0627614	0.589247	-0.0834552	0.431167	-0.0865259	0.107789	0.329789	0.193831	0.255908	0.788315	0.0730465	0.772916	0.253667	0.429121	-0.989136	0.28895
-4.46128	-0.562153	0.123762	1.08005	0.496977	0.875714	-0.893157	-0.0626667	0.589337	-0.0825812	0.431307	-0.0862753	0.107425	0.32981	0.194074	0.255568	0.78872	0.0732272	0.773189	0.253686	0.429084	-0.98847	0.28857
-4.4608	-0.562795	0.123477	1.07909	0.496658	0.876881	-0.892374	-0.0622452	0.589256	-0.0821123	0.431707	-0.0858941	0.10723	0.330363	0.194708	0.255837	0.789288	0.0732065	0.773621	0.253699	0.429231	-0.987485	0.288447
-4.46032	-0.564482	0.123204	1.07914	0.496786	0.87792	-0.891105	-0.0618923	0.589336	-0.082041	0.43171	-0.0850122	0.107138	0.330591	0.19506	0.256062	0.789408	0.0735755	0.773453	0.253622	0.429012	-0.986968	0.28844
-4.45984	-0.564864	0.12334	1.07897	0.497612	0.879041	-0.891047	-0.0619162	0.589428	-0.0808297	0.431575	-0.0851129	0.107308	0.330961	0.195068	0.255736	0.789381	0.0736413	0.773398	0.254106	0.429099	-0.985895	0.28835
-4.45936	-0.565437	0.12332	1.07848	0.498094	0.87999	-0.890735	-0.0611427	0.58957	-0.080054	0.431653	-0.08503	0.107284	0.331352	0.195277	0.255285	0.79058	0.073782	0.773234	0.254148	0.429418	-0.984834	0.288422
-4.45888	-0.566535	0.12312	1.07818	0.498441	0.880811	-0.889255	-0.0610511	0.589524	-0.0786691	0.431598	-0.0842387	0.106715	0.331722	0.195833	0.254852	0.790971	0.0737132	0.773134	0.253791	0.429744	-0.983543	0.28825
-4.4584	-0.566316	0.122851	1.07745	0.499105	0.881923	-0.889349	-0.0612798	0.589481	-0.0785795	0.432081	-0.0832041	0.106781	0.332227	0.195723	0.254465	0.791579	0.0739114	0.773226	0.253903	0.429895	-0.982776	0.288422
-4.45792	-0.566553	0.12216	1.07765	0.499333	0.882823	-0.88869	-0.0607872	0.589346	-0.0777444	0.432445	-0.0829944	0.106428	0.332428	0.195827	0.254494	0.790734	0.0743982	0.773066	0.25377	0.430222	-0.982193	0.287701
-4.45744	-0.567237	0.121997	1.07767	0.498281	0.883608	-0.887131	-0.0603621	0.589322	-0.0777525	0.432073	-0.0824429	0.105964	0.332979	0.195253	0.254762	0.791176	0.0744952	0.772826	0.253701	0.430536	-0.98152	0.287708
-4.45696	-0.567163	0.121964	1.07763	0.498059	0.884579	-0.886943	-0.0612077	0.58943	-0.0778306	0.431472	-0.0807405	0.105374	0.333078	0.195426	0.254277	0.791262	0.0746329	0.772949	0.253649	0.430859	-0.980722	0.287693
-4.45648	-0.567214	0.12178	1.07682	0.49813	0.885488	-0.886569	-0.060952	0.58932	-0.0763999	0.43135	-0.079937	0.104701	0.333401	0.195463	0.254002	0.791973	0.0748471	0.772659	0.253311	0.43137	-0.979589	0.28764
-4.456	-0.568474	0.122224	1.07698	0.498133	0.88615	-0.887334	-0.0614755	0.589294	-0.0751682	0.431568	-0.0799743	0.104587	0.333853	0.195828	0.254054	0.792734	0.0751714	0.772358	0.253763	0.431714	-0.978535	0.287211
-4.45552	-0.568969	0.122294	1.0761	0.497911	0.887043	-0.887459	-0.0611201	0.589404	-0.0736544	0.43176	-0.079875	0.104039	0.334394	0.196006	0.253882	0.792868	0.0752801	0.772122	0.25419	0.432016	-0.978342	0.286986
-4.45504	-0.569938	0.122791	1.07582	0.497855	0.88741	-0.887032	-0.060744	0.589512	-0.0726201	0.431608	-0.078552	0.103478	0.335036	0.195652	0.253698	0.792952	0.0754656	0.771685	0.253717	0.432319	-0.977616	0.28749
-4.45456	-0.570883	0.122988	1.07629	0.497822	0.888005	-0.887314	-0.0608737	0.589653	-0.0704434	0.432737	-0.0781564	0.102855	0.335817	0.195932	0.254279	0.793198	0.0757193	0.771467	0.253757	0.432722	-0.976354	0.287611
-4.45408	-0.571854	0.122994	1.07612	0.498486	0.888701	-0.887149	-0.0612597	0.589665	-0.0688645	0.432331	-0.0774792	0.102532	0.336319	0.196016	0.254201	0.794014	0.0759344	0.770949	0.253702	0.43293	-0.975757	0.287671
-4.4536	-0.572876	0.122579	1.07587	0.498876	0.889588	-0.887961	-0.0618141	0.589664	-0.067103	0.432862	-0.076386	0.102429	0.336709	0.196078	0.254619	0.794611	0.0760818	0.770714	0.253564	0.432827	-0.975426	0.288025
-4.45312	-0.573441	0.122233	1.0756	0.49948	0.890371	-0.887941	-0.0617166	0.589755	-0.0659056	0.43326	-0.0754725	0.10252	0.337317	0.196274	0.25499	0.795082	0.0761257	0.770529	0.2538	0.433166	-0.97546	0.288166
-4.45264	-0.573843	0.121893	1.07455	0.4996	0.891212	-0.887848	-0.0618818	0.589854	-0.064663	0.433444	-0.0751609	0.102313	0.337657	0.196806	0.254749	0.795063	0.0762179	0.770596	0.253472	0.433347	-0.974652	0.28863
-4.45216	-0.574015	0.121263	1.07377	0.499681	0.891757	-0.88717	-0.0623382	0.589724	-0.063024	0.433391	-0.0741842	0.10207	0.337634	0.197161	0.255159	0.794996	0.0764958	0.770401	0.253723	0.433854	-0.974162	0.288836
-4.45168	-0.575537	0.121872	1.07288	0.499877	0.892475	-0.885352	-0.0629344	0.589718	-0.0622687	0.43336	-0.0743307	0.101994	0.337896	0.197115	0.255303	0.795735	0.076553	0.77054	0.25378	0.434068	-0.973546	0.289309
-4.4512	-0.575702	0.121782	1.07287	0.500154	0.892944	-0.886485	-0.0632278	0.590081	-0.0607559	0.433209	-0.0740384	0.101733	0.338102	0.196851	0.2554	0.796378	0.0767011	0.770249	0.253821	0.434485	-0.972227	0.289576
-4.45072	-0.576244	0.121622	1.07211	0.500631	0.893218	-0.886873	-0.0633824	0.59012	-0.0609142	0.433623	-0.0739469	0.101563	0.338409	0.197131	0.25533	0.796873	0.0767638	0.770311	0.253926	0.434738	-0.971565	0.289591
-4.45024	-0.577122	0.121485	1.07167	0.499332	0.893882	-0.886816	-0.0636804	0.590268	-0.0606652	0.433807	-0.0734045	0.101474	0.33858	0.197595	0.25578	0.797362	0.0767217	0.770256	0.253789	0.434929	-0.970825	0.289745
-4.44976	-0.577938	0.121844	1.07146	0.501328	0.893753	-0.885391	-0.0638734	0.590144	-0.0605769	0.433863	-0.0717077	0.100563	0.338599	0.197295	0.255913	0.79813	0.0768271	0.770339	0.253572	0.435209	-0.970257	0.289931
-4.44928	-0.578354	0.121415	1.07122	0.50125	0.894205	-0.883938	-0.0638984	0.590332	-0.0597081	0.434147	-0.0708769	0.0999246	0.339055	0.197506	0.256118	0.797968	0.076844	0.770199	0.253116	0.435007	-0.97018	0.289981
-4.4488	-0.579311	0.121493	1.07039	0.500658	0.894668	-0.884005	-0.0634254	0.590516	-0.0593643	0.434204	-0.0697939	0.0998527	0.339106	0.197141	0.256457	0.798472	0.076912	0.770513	0.253105	0.435246	-0.969886	0.290154
-4.44832	-0.579823	0.121519	1.06976	0.500986	0.895204	-0.884539	-0.0633394	0.590415	-0.0587019	0.434263	-0.0679547	0.0989444	0.33927	0.197399	0.256391	0.798368	0.0768149	0.770633	0.25276	0.435561	-0.968618	0.290082
-4.44784	-0.579926	0.121531	1.0695	0.500844	0.895904	-0.883308	-0.0631064	0.590507	-0.0581144	0.434655	-0.0665623	0.098591	0.340022	0.19701	0.256712	0.798474	0.0769608	0.770468	0.252522	0.435887	-0.968694	0.290538
-4.44736	-0.580512	0.121608	1.0691	0.50176	0.896818	-0.88307	-0.0626006	0.590345	-0.0570964	0.434559	-0.0662628	0.0980661	0.340287	0.197148	0.256462	0.798919	0.0768827	0.770881	0.252504	0.435912	-0.967733	0.290711
-4.44688	-0.581177	0.121107	1.06858	0.502568	0.897561	-0.881595	-0.0622533	0.590476	-0.0569525	0.434611	-0.0661913	0.0974121	0.340517	0.196908	0.255972	0.799805	0.077008	0.77109	0.25273	0.436665	-0.967261	0.290874
-4.4464	-0.581882	0.121392	1.06844	0.503317	0.898322	-0.880262	-0.0620969	0.590543	-0.0566271	0.434603	-0.0656211	0.0970518	0.340303	0.196861	0.255563	0.800004	0.0774832	0.770991	0.25281	0.437135	-0.966671	0.291007
-4.44592	-0.58213	0.121558	1.068	0.504236	0.89898	-0.878869	-0.0614781	0.590519	-0.0559225	0.434877	-0.0644387	0.0969643	0.340429	0.197249	0.256002	0.800213	0.0777581	0.771174	0.252591	0.437778	-0.965692	0.290892
-4.44544	-0.582354	0.121734	1.06705	0.506115	0.899961	-0.875866	-0.0615075	0.590592	-0.0562939	0.434305	-0.0633536	0.0965045	0.340443	0.197684	0.256207	0.800374	0.0776385	0.771068	0.252458	0.438163	-0.965274	0.290974
-4.44496	-0.583226	0.122298	1.06637	0.50806	0.900489	-0.875087	-0.0619756	0.590484	-0.0552042	0.435004	-0.0622187	0.0960586	0.340761	0.19767	0.255551	0.800933	0.0781082	0.771237	0.252264	0.438141	-0.965022	0.290952
-4.44448	-0.583239	0.122022	1.06557	0.508388	0.900907	-0.872637	-0.0614082	0.590464	-0.0547376	0.434643	-0.061349	0.0956068	0.340993	0.197485	0.255342	0.801435	0.0783911	0.771422	0.252109	0.438783	-0.964987	0.291104
-4.444	-0.584228	0.121621	1.06495	0.508765	0.901867	-0.87139	-0.0608569	0.590529	-0.0555164	0.434808	-0.0606589	0.0957448	0.341175	0.197525	0.255417	0.801809	0.0788963	0.771658	0.252003	0.438939	-0.964774	0.290862
-4.44352	-0.584966	0.121432	1.06386	0.509388	0.902442	-0.869924	-0.0605521	0.590847	-0.0552429	0.434074	-0.0609547	0.0952601	0.341496	0.197596	0.25523	0.80237	0.0790473	0.77182	0.251857	0.438962	-0.963906	0.290881
-4.44304	-0.584886	0.121292	1.06381	0.509714	0.902865	-0.868609	-0.0603248	0.590944	-0.0546721	0.434237	-0.0603757	0.0949361	0.34165	0.198111	0.254776	0.803417	0.0795282	0.771461	0.252076	0.439183	-0.962862	0.290784
-4.44256	-0.585026	0.121601	1.0633	0.511108	0.903873	-0.867473	-0.0604485	0.590887	-0.0540728	0.433867	-0.0596099	0.0946229	0.341777	0.198263	0.254273	0.804602	0.0799344	0.771313	0.25219	0.439652	-0.962731	0.29064
-4.44208	-0.585624	0.121701	1.06256	0.511783	0.904311	-0.867235	-0.0598092	0.591091	-0.0533194	0.433895	-0.0587576	0.0943282	0.341719	0.198401	0.253959	0.804418	0.0804521	0.771347	0.252324	0.439732	-0.963264	0.290626
-4.4416	-0.585227	0.12204	1.06179	0.512482	0.90485	-0.865614	-0.059129	0.591467	-0.0538423	0.433648	-0.057768	0.0942344	0.341946	0.19853	0.253422	0.804705	0.0805866	0.771284	0.252467	0.439844	-0.962452	0.290775
-4.44112	-0.585761	0.12229	1.06122	0.513396	0.904808	-0.863093	-0.0587683	0.59164	-0.0534116	0.432727	-0.0573661	0.0943678	0.342019	0.19829	0.253249	0.805701	0.0810042	0.771189	0.252439	0.440266	-0.962248	0.291105
-4.44064	-0.586266	0.121819	1.06107	0.514629	0.904838	-0.86277	-0.0580629	0.591725	-0.0532684	0.432712	-0.0568636	0.0938717	0.342339	0.198386	0.252252	0.806462	0.0813366	0.771057	0.251983	0.440448	-0.962133	0.291179
-4.44016	-0.586209	0.122582	1.06088	0.515634	0.904932	-0.861249	-0.0576591	0.591875	-0.0532367	0.432298	-0.0564977	0.0933637	0.34218	0.198821	0.252118	0.80781	0.0816861	0.770544	0.252061	0.440762	-0.961998	0.291454
-4.43968	-0.585957	0.122867	1.0604	0.517111	0.905624	-0.857773	-0.0570642	0.591672	-0.0528468	0.432289	-0.0558055	0.0928364	0.342515	0.198634	0.251431	0.808493	0.0822101	0.770585	0.251811	0.440647	-0.961909	0.291982
-4.4392	-0.586119	0.123983	1.06018	0.519772	0.906703	-0.856826	-0.0564834	0.591753	-0.0528323	0.432145	-0.0551086	0.092132	0.342289	0.19889	0.251342	0.808632	0.0823906	0.770631	0.252072	0.440921	-0.961707	0.29226
-4.43872	-0.586087	0.124294	1.06006	0.521559	0.906985	-0.855297	-0.0555672	0.591775	-0.0515489	0.431875	-0.0549656	0.0918662	0.342162	0.199021	0.251232	0.808711	0.0825427	0.770747	0.252252	0.440968	-0.96012	0.292166
-4.43824	-0.585982	0.124819	1.05973	0.522803	0.907466	-0.854517	-0.0558094	0.591698	-0.0518102	0.432094	-0.0533207	0.091482	0.342169	0.19871	0.250605	0.808606	0.0827445	0.77067	0.25233	0.441501	-0.959805	0.292665
-4.43776	-0.585483	0.125312	1.05945	0.524184	0.908068	-0.854296	-0.0551061	0.591861	-0.0512676	0.432092	-0.0521908	0.0914486	0.341924	0.198506	0.250598	0.80884	0.083007	0.77087	0.252507	0.441749	-0.958989	0.29291
-4.43728	-0.585464	0.125672	1.05865	0.526474	0.908793	-0.853796	-0.055103	0.591972	-0.051391	0.432188	-0.0511361	0.0913975	0.341471	0.198358	0.250497	0.809842	0.0832754	0.770757	0.25281	0.441933	-0.958109	0.292954
-4.4368	-0.58569	0.125708	1.05869	0.528324	0.909607	-0.853264	-0.055148	0.592142	-0.0513594	0.431878	-0.050305	0.0908386	0.341582	0.198631	0.250807	0.81074	0.0831396	0.770731	0.253071	0.441699	-0.957281	0.293405
-4.43632	-0.58551	0.125701	1.0583	0.530015	0.910055	-0.852092	-0.0543525	0.592177	-0.0512755	0.432054	-0.049374	0.0908596	0.342057	0.198613	0.250149	0.810964	0.0831364	0.770442	0.252853	0.441509	-0.95762	0.293847
-4.43584	-0.585634	0.125433	1.05867	0.531135	0.910087	-0.851147	-0.0533079	0.592366	-0.0509406	0.432014	-0.0491809	0.0910417	0.342265	0.198563	0.250085	0.811107	0.0833081	0.77052	0.252745	0.441482	-0.957166	0.294153
-4.43536	-0.585468	0.125752	1.05828	0.532032	0.910832	-0.850163	-0.0520904	0.592542	-0.0508134	0.432358	-0.0486281	0.0907622	0.342476	0.198724	0.250256	0.811562	0.0835318	0.770324	0.25321	0.441542	-0.955929	0.294564
-4.43488	-0.586084	0.126137	1.05833	0.532687	0.911573	-0.849561	-0.05158	0.592489	-0.0507672	0.431918	-0.0480627	0.0903833	0.342581	0.199139	0.250297	0.811807	0.0837266	0.770457	0.253123	0.441734	-0.95532	0.29447
-4.4344	-0.58597	0.126412	1.05873	0.534921	0.911783	-0.849002	-0.0513503	0.592572	-0.0510611	0.43179	-0.0468169	0.0895538	0.342598	0.199089	0.250478	0.811778	0.0838356	0.770127	0.252867	0.44191	-0.954857	0.294957
-4.43392	-0.586293	0.12683	1.05858	0.536822	0.913024	-0.848612	-0.0510548	0.592758	-0.0513695	0.432252	-0.0464207	0.0892889	0.34247	0.199031	0.250672	0.812041	0.0837443	0.770273	0.252995	0.442196	-0.954376	0.295164
-4.43344	-0.585894	0.127139	1.05849	0.537685	0.91385	-0.847984	-0.050563	0.592853	-0.0516589	0.432143	-0.0451204	0.0886109	0.342843	0.19924	0.250977	0.812021	0.0838983	0.770024	0.253029	0.442358	-0.953915	0.294948
-4.43296	-0.585602	0.127588	1.05703	0.537939	0.913769	-0.847533	-0.0502605	0.592869	-0.0519368	0.431703	-0.0461033	0.0891818	0.342849	0.199296	0.250871	0.812325	0.0839171	0.770179	0.253019	0.442396	-0.953741	0.295127
-4.43248	-0.585229	0.128084	1.05589	0.538866	0.914448	-0.847108	-0.0497415	0.593132	-0.052416	0.431668	-0.0459939	0.0890985	0.343016	0.199057	0.251764	0.813068	0.0840135	0.769997	0.253069	0.442932	-0.953754	0.29557
-4.432	-0.585004	0.128467	1.05519	0.540244	0.915029	-0.84652	-0.0489566	0.593399	-0.0532657	0.431768	-0.0452744	0.088965	0.343124	0.199262	0.252162	0.814048	0.0841148	0.770294	0.25296	0.443594	-0.953593	0.295797
-4.43152	-0.585377	0.129001	1.05425	0.541769	0.915508	-0.845795	-0.0484879	0.59368	-0.0535247	0.431918	-0.0446811	0.0889177	0.343141	0.199293	0.25195	0.81589	0.0843134	0.77026	0.253289	0.443828	-0.953481	0.295794
-4.43104	-0.585057	0.129786	1.0538	0.543313	0.916015	-0.845154	-0.0479309	0.593861	-0.0535612	0.432283	-0.043798	0.0885007	0.34336	0.199301	0.251623	0.815888	0.0845394	0.770319	0.252943	0.444044	-0.953163	0.295969
-4.43056	-0.585445	0.130134	1.05349	0.544394	0.916442	-0.844412	-0.0476485	0.594153	-0.0533922	0.431981	-0.0433512	0.0889373	0.343148	0.19936	0.251993	0.816564	0.084809	0.770254	0.252709	0.444344	-0.952819	0.295863
-4.43008	-0.586073	0.130658	1.05311	0.545593	0.916869	-0.84202	-0.0468374	0.59422	-0.0535701	0.432199	-0.0424702	0.0882837	0.343044	0.199292	0.251827	0.817014	0.0846631	0.770075	0.25238	0.444473	-0.9522	0.295763
-4.4296	-0.58638	0.131291	1.05236	0.546693	0.916829	-0.839802	-0.0465157	0.594373	-0.0537897	0.43213	-0.0415341	0.0871148	0.343304	0.199971	0.251572	0.81738	0.0848393	0.769731	0.251849	0.444579	-0.95155	0.295482
-4.42912	-0.587051	0.131232	1.05173	0.547249	0.917672	-0.838472	-0.046165	0.594502	-0.0538903	0.431923	-0.0411633	0.0867579	0.343634	0.200074	0.251163	0.817799	0.0848021	0.769585	0.251398	0.444941	-0.951434	0.295401
-4.42864	-0.587094	0.131824	1.05134	0.547865	0.918077	-0.837365	-0.0464428	0.594511	-0.0538122	0.432051	-0.0394764	0.086121	0.34399	0.199856	0.251808	0.819164	0.0849667	0.769292	0.25177	0.44513	-0.950711	0.295373
-4.42816	-0.587243	0.132225	1.05072	0.548224	0.918546	-0.836158	-0.0460546	0.594692	-0.0523797	0.432146	-0.0388586	0.0859951	0.343988	0.200135	0.251557	0.820217	0.0850788	0.769704	0.251338	0.445263	-0.950055	0.295411
-4.42768	-0.587793	0.132745	1.04964	0.549103	0.919307	-0.835513	-0.0458693	0.594852	-0.0513885	0.432323	-0.0380562	0.0859893	0.344091	0.20006	0.251072	0.820374	0.0850386	0.769674	0.251637	0.445548	-0.949469	0.29585
-4.4272	-0.5885	0.133052	1.04869	0.549308	0.919991	-0.834531	-0.0457695	0.594702	-0.0523214	0.432487	-0.0376672	0.0860901	0.344143	0.200199	0.251454	0.820701	0.0852633	0.769873	0.251646	0.445467	-0.94852	0.296049
-4.42672	-0.589087	0.133133	1.04811	0.548662	0.9207	-0.832743	-0.0452097	0.594983	-0.052388	0.432374	-0.0368946	0.0855795	0.344064	0.200326	0.251546	0.821413	0.0855846	0.769619	0.251493	0.445754	-0.946742	0.296202
-4.42624	-0.589303	0.13326	1.04754	0.549945	0.921272	-0.831408	-0.0445563	0.595077	-0.0520737	0.432745	-0.0357924	0.0853969	0.344231	0.200307	0.251227	0.8216	0.0859876	0.769477	0.251346	0.446321	-0.946367	0.296604
-4.42576	-0.590184	0.133801	1.04689	0.550118	0.922578	-0.829094	-0.0446443	0.595224	-0.052523	0.433168	-0.0343217	0.0857671	0.344283	0.20046	0.251031	0.822335	0.0860731	0.769731	0.251615	0.447259	-0.945925	0.296492
-4.42528	-0.590633	0.13465	1.04618	0.55116	0.923327	-0.827566	-0.0440179	0.595418	-0.0524993	0.433819	-0.0334714	0.0855012	0.344262	0.200842	0.250207	0.823012	0.0862994	0.769781	0.251919	0.447607	-0.945016	0.296721
-4.4248	-0.591569	0.134897	1.04565	0.551897	0.924166	-0.827295	-0.0434978	0.595346	-0.0528035	0.433918	-0.0323055	0.0853471	0.34463	0.200928	0.249439	0.823536	0.0864689	0.769773	0.251627	0.447508	-0.944551	0.297064
-4.42432	-0.592055	0.135764	1.04539	0.551688	0.924692	-0.826499	-0.0429103	0.595391	-0.0531757	0.434062	-0.0312992	0.0856582	0.344664	0.200893	0.249279	0.824141	0.0866828	0.769503	0.251677	0.447641	-0.944355	0.297129
-4.42384	-0.592564	0.13636	1.04545	0.551992	0.92536	-0.825345	-0.0428379	0.595526	-0.0530442	0.434412	-0.0296892	0.0858623	0.344927	0.200561	0.249335	0.82461	0.0867917	0.769489	0.251463	0.448137	-0.9442	0.297203
-4.42336	-0.593604	0.136877	1.04528	0.553119	0.925959	-0.823586	-0.0427637	0.595833	-0.052969	0.434575	-0.0281052	0.0856305	0.345671	0.200226	0.248555	0.824535	0.0871016	0.769618	0.251368	0.448353	-0.943082	0.297448
-4.42288	-0.593642	0.137663	1.04549	0.553284	0.926378	-0.823192	-0.0422792	0.595844	-0.0527525	0.434227	-0.0280541	0.0861701	0.345764	0.200196	0.24831	0.824236	0.0873588	0.769412	0.251069	0.448571	-0.942384	0.298089
-4.4224	-0.594114	0.138144	1.04564	0.554994	0.926647	-0.821418	-0.0419131	0.596009	-0.0513823	0.433944	-0.0268639	0.0864755	0.346013	0.200362	0.247823	0.823789	0.0874456	0.769766	0.250673	0.448814	-0.94234	0.298415
-4.42192	-0.594617	0.138414	1.04528	0.555909	0.927282	-0.82098	-0.0406657	0.596061	-0.0518179	0.434451	-0.0257049	0.0874432	0.346117	0.200173	0.247258	0.824252	0.0877077	0.769818	0.250616	0.449147	-0.942122	0.298768
-4.42144	-0.594555	0.138386	1.0444	0.556531	0.927635	-0.820793	-0.0402443	0.596178	-0.0517011	0.434542	-0.02513	0.0876694	0.346404	0.200444	0.246929	0.824453	0.0878823	0.770077	0.250516	0.449293	-0.94158	0.299061
-4.42096	-0.595091	0.138686	1.04459	0.557579	0.927731	-0.819302	-0.0393332	0.596272	-0.0508667	0.434249	-0.0252717	0.0871958	0.346283	0.200451	0.245832	0.824223	0.0881168	0.77013	0.250131	0.449543	-0.940952	0.299224
-4.42048	-0.595336	0.139206	1.04378	0.558009	0.92813	-0.818351	-0.0387395	0.596474	-0.0502028	0.433906	-0.0251619	0.0875395	0.346628	0.200373	0.245828	0.824487	0.0881243	0.770265	0.249777	0.449813	-0.939895	0.299427
-4.42	-0.596049	0.139312	1.04325	0.558036	0.929179	-0.817269	-0.038074	0.596563	-0.0501482	0.433985	-0.0239872	0.0875851	0.347414	0.200561	0.245568	0.824016	0.088765	0.77082	0.249356	0.449921	-0.939771	0.299762
-4.41952	-0.596776	0.139043	1.04328	0.558271	0.930318	-0.815968	-0.0373069	0.59667	-0.0500878	0.43426	-0.0226401	0.0879872	0.347444	0.200691	0.244863	0.823678	0.0890217	0.770946	0.2493	0.450219	-0.939448	0.300045
-4.41904	-0.597131	0.139544	1.04262	0.558081	0.931139	-0.813317	-0.0364467	0.596512	-0.0490177	0.434134	-0.0225499	0.0878047	0.34785	0.200434	0.24447	0.823494	0.0895135	0.771113	0.249127	0.450467	-0.93963	0.300108
-4.41856	-0.596748	0.140038	1.04219	0.559656	0.931669	-0.811129	-0.0357704	0.596512	-0.0488546	0.43469	-0.0226762	0.088381	0.34812	0.200876	0.244125	0.823846	0.0897044	0.77114	0.248868	0.450561	-0.939496	0.30034
-4.41808	-0.597277	0.139876	1.04203	0.560868	0.932211	-0.809073	-0.0348727	0.596591	-0.0479358	0.434283	-0.0233608	0.088315	0.347727	0.201486	0.243579	0.823721	0.0897607	0.771633	0.248503	0.450678	-0.939242	0.300567
-4.4176	-0.59762	0.140125	1.04173	0.562332	0.932473	-0.807831	-0.0343224	0.59652	-0.0474065	0.434306	-0.0235087	0.08866	0.347846	0.20195	0.243243	0.823664	0.0899414	0.772022	0.248497	0.450745	-0.938972	0.301086
-4.41712	-0.598023	0.140397	1.04111	0.563054	0.932822	-0.806732	-0.0338516	0.596341	-0.0472679	0.43399	-0.0233226	0.0892338	0.347973	0.202219	0.242901	0.823257	0.090259	0.772507	0.248426	0.450926	-0.938467	0.301778
-4.41664	-0.598692	0.140603	1.04095	0.562702	0.933865	-0.804352	-0.0329378	0.596088	-0.0472315	0.433862	-0.0221729	0.0889274	0.348325	0.202361	0.242504	0.823637	0.0908569	0.772605	0.248245	0.450905	-0.938391	0.301752
-4.41616	-0.599171	0.14119	1.04058	0.562355	0.934166	-0.803548	-0.0321452	0.596219	-0.0464607	0.433404	-0.0219641	0.0894482	0.348652	0.203066	0.242489	0.823701	0.0914779	0.772694	0.247968	0.451451	-0.937607	0.302104
-4.41568	-0.599134	0.141553	1.04107	0.561341	0.935001	-0.800495	-0.0311969	0.596327	-0.0465067	0.434029	-0.0216666	0.0902018	0.349111	0.20356	0.242368	0.823508	0.092091	0.773293	0.247627	0.45167	-0.937115	0.302563
-4.4152	-0.59917	0.142099	1.0409	0.562407	0.935311	-0.798228	-0.0307806	0.596286	-0.046793	0.434401	-0.0210375	0.0907764	0.349653	0.203815	0.242011	0.82367	0.0922843	0.773639	0.247384	0.452161	-0.937292	0.303415
-4.41472	-0.600145	0.14229	1.04048	0.562615	0.935402	-0.796611	-0.0303865	0.596111	-0.0463818	0.434487	-0.0209688	0.0911474	0.349855	0.203896	0.241413	0.824091	0.0926279	0.77403	0.2471	0.452201	-0.93748	0.30371
-4.41424	-0.59983	0.142764	1.04032	0.562457	0.936345	-0.79343	-0.0300766	0.596461	-0.0466147	0.434016	-0.0199261	0.0916863	0.349927	0.204032	0.240937	0.823832	0.0927453	0.774334	0.247154	0.452487	-0.937679	0.304215
-4.41376	-0.600632	0.143353	1.03997	0.563419	0.937203	-0.791277	-0.0297829	0.596361	-0.0458797	0.434035	-0.0196024	0.0921231	0.350667	0.204322	0.240721	0.823789	0.0930134	0.774015	0.2472	0.45265	-0.937854	0.304781
-4.41328	-0.601821	0.143538	1.04028	0.564086	0.938039	-0.788497	-0.0293261	0.596332	-0.045667	0.434576	-0.0197794	0.0926329	0.35083	0.204695	0.240739	0.8238	0.0934551	0.774174	0.247334	0.452826	-0.937726	0.305214
-4.4128	-0.602195	0.143787	1.04048	0.565035	0.93834	-0.786953	-0.0290156	0.596341	-0.0454574	0.434572	-0.0192246	0.092438	0.351096	0.205032	0.239696	0.822945	0.0939255	0.774155	0.247284	0.453207	-0.938088	0.305525
-4.41232	-0.603071	0.144095	1.03997	0.565503	0.9388	-0.783371	-0.0285837	0.596459	-0.0452783	0.434323	-0.019406	0.0919916	0.35152	0.2057	0.23992	0.822742	0.0943602	0.774259	0.247456	0.453806	-0.938334	0.306123
-4.41184	-0.6033	0.144399	1.04007	0.566281	0.939179	-0.782583	-0.0276772	0.596407	-0.0457909	0.434491	-0.0191429	0.0913959	0.352235	0.205862	0.239363	0.822743	0.0947152	0.774202	0.24759	0.454139	-0.938514	0.306379
-4.41136	-0.604127	0.144724	1.04014	0.567698	0.939494	-0.780163	-0.0270456	0.596426	-0.0454693	0.434396	-0.0191745	0.091737	0.352598	0.205852	0.239329	0.822887	0.0947885	0.774587	0.247727	0.454526	-0.938546	0.306294
-4.41088	-0.604502	0.144919	1.0405	0.56758	0.939897	-0.778233	-0.0260073	0.596505	-0.0453915	0.434514	-0.0198304	0.0909878	0.352501	0.206112	0.238717	0.823147	0.0949297	0.775032	0.247927	0.45504	-0.93875	0.306546
-4.4104	-0.605252	0.145257	1.04068	0.569289	0.940664	-0.774037	-0.0250136	0.596433	-0.0450878	0.435086	-0.0187815	0.0902265	0.352787	0.20603	0.238047	0.823124	0.0948695	0.775268	0.247938	0.454881	-0.938172	0.306923
-4.40992	-0.605822	0.144933	1.0408	0.570107	0.940781	-0.771884	-0.0241734	0.5964	-0.0447709	0.435335	-0.0190535	0.0905767	0.352934	0.206814	0.237783	0.822753	0.0951241	0.775909	0.247895	0.455518	-0.937914	0.3074
-4.40944	-0.606499	0.145659	1.04112	0.571017	0.940603	-0.77044	-0.0241547	0.596377	-0.0440919	0.434874	-0.0186703	0.0901247	0.35325	0.207405	0.237212	0.82291	0.0953912	0.776351	0.247903	0.455692	-0.93749	0.307654
-4.40896	-0.606959	0.146286	1.0412	0.572773	0.940557	-0.769244	-0.0234849	0.59643	-0.0435521	0.435305	-0.018899	0.09003	0.353265	0.208112	0.236908	0.823166	0.095674	0.776783	0.247823	0.455635	-0.937538	0.307546
-4.40848	-0.607011	0.147519	1.04145	0.573572	0.941305	-0.766244	-0.0231374	0.596464	-0.0432889	0.435358	-0.0194243	0.0895081	0.352992	0.208685	0.236539	0.823151	0.0958551	0.776818	0.247994	0.455744	-0.937774	0.30807
-4.408	-0.60759	0.147704	1.04215	0.574334	0.941678	-0.76386	-0.0231568	0.596189	-0.0436705	0.435708	-0.0192688	0.0895639	0.353122	0.209176	0.235928	0.822814	0.0959141	0.777222	0.248197	0.455747	-0.937803	0.30855
-4.40752	-0.606893	0.147764	1.0427	0.574898	0.942178	-0.760795	-0.0226796	0.596068	-0.0437282	0.435876	-0.0182239	0.0894503	0.352874	0.20988	0.235981	0.823081	0.0958968	0.777326	0.248348	0.455978	-0.937848	0.309301
-4.40704	-0.607604	0.148806	1.04287	0.575603	0.942956	-0.759612	-0.0228646	0.59591	-0.0434048	0.436108	-0.0183264	0.0888414	0.352914	0.210362	0.235862	0.823829	0.0958263	0.777126	0.248232	0.455957	-0.937681	0.309494
-4.40656	-0.608395	0.149304	1.04276	0.576325	0.943473	-0.758033	-0.0221861	0.595766	-0.0421864	0.436202	-0.0188613	0.0887372	0.353054	0.210908	0.235529	0.824243	0.0960665	0.777464	0.248492	0.456131	-0.937721	0.309859
-4.40608	-0.608975	0.149746	1.04323	0.576972	0.94416	-0.756117	-0.0220025	0.595739	-0.0424756	0.435971	-0.0187333	0.0890664	0.353209	0.21159	0.235513	0.824013	0.0961025	0.777549	0.248227	0.456597	-0.937683	0.309904
-4.4056	-0.60963	0.150295	1.04302	0.57736	0.944983	-0.754267	-0.021528	0.595685	-0.0422412	0.435976	-0.0184378	0.0896307	0.353294	0.211842	0.235495	0.824435	0.0966886	0.777327	0.248304	0.456738	-0.936852	0.310111
-4.40512	-0.60965	0.149908	1.04361	0.578003	0.945256	-0.753693	-0.0209373	0.595419	-0.0426739	0.435887	-0.0181642	0.0896464	0.353513	0.212099	0.235386	0.824208	0.0970036	0.77724	0.24793	0.457038	-0.936343	0.310139
-4.40464	-0.610794	0.150472	1.0436	0.579047	0.945612	-0.752521	-0.0199329	0.595379	-0.0422762	0.436321	-0.0191942	0.0896519	0.353948	0.212144	0.235692	0.824823	0.0973132	0.776932	0.247863	0.457221	-0.93666	0.310232
-4.40416	-0.61195	0.151062	1.04357	0.580136	0.9465	-0.751441	-0.0189006	0.595151	-0.0419686	0.436327	-0.0198954	0.0900325	0.354182	0.212763	0.236279	0.825125	0.0975182	0.77706	0.247881	0.457123	-0.936799	0.310619
-4.40368	-0.613439	0.150816	1.04302	0.581159	0.946677	-0.750972	-0.0185409	0.595171	-0.0419481	0.43597	-0.0202644	0.0896925	0.353903	0.212821	0.237037	0.825341	0.0979126	0.777324	0.248108	0.457094	-0.936897	0.310609
-4.4032	-0.613902	0.151198	1.04221	0.581422	0.947502	-0.748973	-0.0177659	0.594918	-0.04219	0.435916	-0.0194435	0.0897368	0.353742	0.213165	0.237635	0.825336	0.0982376	0.777072	0.248115	0.457587	-0.936839	0.310739
-4.40272	-0.614559	0.151411	1.04222	0.581892	0.948378	-0.747457	-0.0173882	0.594926	-0.0422622	0.436052	-0.0201824	0.0903334	0.353805	0.213428	0.237918	0.825933	0.0982882	0.776811	0.248125	0.457875	-0.937219	0.31126
-4.40224	-0.615721	0.151053	1.042	0.58275	0.9487	-0.746331	-0.0169192	0.594453	-0.042949	0.436432	-0.0201954	0.0896492	0.353979	0.213557	0.23808	0.825683	0.0984726	0.77677	0.248057	0.457937	-0.936892	0.311218
-4.40176	-0.616005	0.151099	1.04221	0.583064	0.949441	-0.743194	-0.0161833	0.594389	-0.0422913	0.436879	-0.0205377	0.0891682	0.354192	0.213813	0.237794	0.825757	0.0988455	0.777074	0.247988	0.458275	-0.936671	0.31117
-4.40128	-0.616916	0.151147	1.04121	0.584755	0.95033	-0.741236	-0.0155669	0.594352	-0.0411839	0.437149	-0.0204791	0.0884995	0.354067	0.214176	0.238452	0.826672	0.0990564	0.777094	0.248247	0.458567	-0.936374	0.311582
-4.4008	-0.617725	0.151167	1.04148	0.585702	0.950784	-0.739757	-0.0147601	0.594246	-0.0407594	0.437346	-0.0210296	0.0884364	0.354254	0.214517	0.238784	0.827204	0.0991546	0.777285	0.248294	0.458538	-0.93632	0.311819
-4.40032	-0.618115	0.150408	1.04158	0.586188	0.95119	-0.737647	-0.0148261	0.594053	-0.0399684	0.437068	-0.0209859	0.0883784	0.354337	0.214691	0.239274	0.827961	0.0996269	0.777641	0.248291	0.459061	-0.936474	0.312218
-4.39984	-0.618938	0.150951	1.04157	0.587647	0.951137	-0.735126	-0.0149746	0.594052	-0.0400461	0.437557	-0.021617	0.088411	0.354483	0.214829	0.239126	0.828847	0.0997375	0.777424	0.248173	0.459147	-0.936976	0.31203
-4.39936	-0.620501	0.150537	1.04171	0.587125	0.950643	-0.733763	-0.0150248	0.594071	-0.0401186	0.438151	-0.0222632	0.0884359	0.354726	0.215297	0.238996	0.829387	0.0998698	0.777649	0.247937	0.459643	-0.936653	0.312618
-4.39888	-0.621128	0.150442	1.04173	0.588815	0.950919	-0.732567	-0.0148356	0.593902	-0.0399749	0.438098	-0.0225002	0.0883155	0.355072	0.21571	0.238679	0.830155	0.0998718	0.777967	0.24836	0.460328	-0.936887	0.313179
-4.3984	-0.621472	0.150374	1.04132	0.589843	0.95139	-0.73146	-0.014392	0.593765	-0.0398817	0.438404	-0.0226648	0.0880056	0.355178	0.216218	0.238232	0.830003	0.0999468	0.778324	0.248381	0.460214	-0.936699	0.313796
-4.39792	-0.62239	0.150624	1.0409	0.590579	0.952077	-0.730106	-0.0135508	0.593775	-0.0403169	0.438912	-0.0227977	0.0876936	0.355359	0.21658	0.238637	0.83076	0.0999516	0.778513	0.248859	0.460427	-0.936189	0.314184
-4.39744	-0.623044	0.150946	1.04049	0.592954	0.952496	-0.728656	-0.012943	0.593748	-0.0402925	0.439286	-0.0234149	0.0876217	0.355728	0.21677	0.238356	0.831423	0.100134	0.778764	0.248728	0.460977	-0.935827	0.314213
-4.39696	-0.623419	0.151334	1.04017	0.594552	0.95322	-0.727385	-0.0123962	0.593661	-0.0402656	0.439367	-0.0234714	0.0871958	0.355969	0.216616	0.238154	0.831371	0.0999752	0.778351	0.248548	0.461527	-0.935941	0.313987
-4.39648	-0.624262	0.151415	1.0401	0.595791	0.954255	-0.723197	-0.0118751	0.593566	-0.0406324	0.439518	-0.0231273	0.0872054	0.356363	0.216917	0.23849	0.832087	0.099952	0.77852	0.248407	0.46182	-0.935826	0.314093
-4.396	-0.625226	0.15137	1.03942	0.597215	0.954574	-0.722277	-0.0111304	0.593311	-0.0410474	0.439724	-0.0226459	0.0870855	0.356859	0.217084	0.238797	0.83325	0.099864	0.778639	0.248687	0.462008	-0.936302	0.314518
-4.39552	-0.62573	0.150534	1.03886	0.59888	0.954782	-0.720389	-0.0112781	0.593242	-0.041102	0.439969	-0.0230259	0.087003	0.357157	0.217546	0.239172	0.83409	0.0997334	0.778656	0.248716	0.462484	-0.936085	0.314481
-4.39504	-0.62732	0.150217	1.03888	0.599466	0.955423	-0.719209	-0.0107536	0.593131	-0.0410052	0.439799	-0.0239123	0.0872683	0.357266	0.217714	0.239415	0.834495	0.100105	0.778644	0.249023	0.462734	-0.936874	0.314884
-4.39456	-0.628043	0.149769	1.03861	0.600253	0.955896	-0.716778	-0.0102438	0.592886	-0.040403	0.439878	-0.023953	0.0870513	0.357416	0.217832	0.240034	0.834862	0.100038	0.778306	0.24926	0.463676	-0.936871	0.315128
-4.39408	-0.628371	0.150201	1.03846	0.601271	0.956819	-0.715692	-0.0103819	0.592829	-0.0398791	0.440513	-0.0242391	0.0871796	0.357634	0.218395	0.241228	0.835411	0.100094	0.77842	0.249157	0.46434	-0.93692	0.315549
-4.3936	-0.628956	0.150495	1.03826	0.60063	0.957202	-0.713935	-0.0104269	0.592751	-0.0394888	0.440268	-0.0242576	0.0869972	0.357576	0.218445	0.241125	0.835763	0.0999472	0.778628	0.249123	0.464901	-0.936875	0.31585
-4.39312	-0.629966	0.150261	1.03828	0.601521	0.957531	-0.712066	-0.0101474	0.592476	-0.0390197	0.440972	-0.0238885	0.0866853	0.357967	0.218587	0.241268	0.83605	0.10004	0.778597	0.249637	0.465368	-0.936735	0.316108
-4.39264	-0.629871	0.150436	1.03764	0.602017	0.957395	-0.709672	-0.0101323	0.592112	-0.0386974	0.441177	-0.0231157	0.0868217	0.35812	0.218921	0.241522	0.836444	0.0999417	0.778534	0.249598	0.465723	-0.936125	0.316117
-4.39216	-0.629565	0.150639	1.03769	0.601637	0.957738	-0.707475	-0.0102578	0.591994	-0.0382995	0.441423	-0.0237242	0.0877443	0.358323	0.219539	0.242199	0.836896	0.0998206	0.778655	0.249572	0.46597	-0.935909	0.316441
-4.39168	-0.630254	0.149924	1.03768	0.602236	0.958672	-0.706563	-0.00997991	0.591851	-0.0381162	0.441883	-0.023377	0.0876701	0.358427	0.219762	0.242282	0.837323	0.0997779	0.778677	0.249376	0.466333	-0.936091	0.316527
-4.3912	-0.630805	0.149878	1.03802	0.603653	0.959441	-0.705547	-0.00992252	0.591635	-0.0381114	0.442069	-0.023337	0.0879393	0.358781	0.220285	0.243012	0.838735	0.0998477	0.778774	0.249353	0.466848	-0.936245	0.316705
-4.39072	-0.631139	0.149451	1.0382	0.605646	0.959602	-0.704283	-0.00988995	0.5915	-0.0378103	0.441939	-0.0233727	0.0880121	0.358671	0.220282	0.242945	0.839451	0.099805	0.778662	0.249652	0.467102	-0.93606	0.317126
-4.39024	-0.633037	0.14972	1.03824	0.606991	0.96046	-0.703339	-0.0092428	0.591427	-0.0371571	0.442069	-0.0232938	0.0884179	0.358651	0.220531	0.243177	0.840028	0.0998676	0.778502	0.249977	0.467451	-0.935814	0.317318
-4.38976	-0.633002	0.149531	1.03861	0.60743	0.960777	-0.702979	-0.00925235	0.591251	-0.0380138	0.441812	-0.0236062	0.0889336	0.358794	0.220883	0.243736	0.840862	0.0996398	0.77878	0.249827	0.467637	-0.935868	0.317396
-4.38928	-0.63294	0.149488	1.03895	0.609329	0.961406	-0.701596	-0.00922071	0.591142	-0.0389302	0.442226	-0.0234308	0.089646	0.358526	0.220796	0.244338	0.841557	0.0994773	0.778914	0.250382	0.467971	-0.935421	0.317697
-4.3888	-0.633229	0.149406	1.03926	0.609701	0.960976	-0.701128	-0.00886955	0.591125	-0.0387661	0.442629	-0.0232662	0.0896274	0.358569	0.220696	0.244523	0.842307	0.0991315	0.778958	0.250589	0.468028	-0.935554	0.318127
-4.38832	-0.633575	0.149578	1.03957	0.610519	0.961372	-0.700793	-0.00840205	0.590991	-0.038953	0.442733	-0.0237109	0.0896869	0.358823	0.220423	0.24482	0.843384	0.0989004	0.778945	0.250958	0.468345	-0.935842	0.318218
-4.38784	-0.633437	0.149425	1.03958	0.611345	0.962005	-0.699536	-0.00830663	0.59092	-0.0394228	0.443512	-0.0231892	0.0892873	0.358848	0.22105	0.244933	0.84383	0.0984994	0.779262	0.251151	0.468684	-0.936239	0.31849
-4.38736	-0.633833	0.149108	1.0394	0.612061	0.962333	-0.698462	-0.00802897	0.590968	-0.0388751	0.443649	-0.0231487	0.0893386	0.358586	0.220969	0.24544	0.84429	0.0987433	0.77948	0.251127	0.468493	-0.936585	0.318777
-4.38688	-0.634331	0.149152	1.03884	0.612115	0.962821	-0.696936	-0.00817522	0.591003	-0.0386713	0.443637	-0.022684	0.0891481	0.358831	0.221033	0.245761	0.845302	0.0988627	0.779765	0.251339	0.468823	-0.936896	0.319324
-4.3864	-0.634693	0.149111	1.03887	0.611942	0.963866	-0.695998	-0.0083142	0.591087	-0.0392904	0.443964	-0.0228805	0.0889772	0.359073	0.221472	0.245412	0.846629	0.0987778	0.779791	0.251396	0.469155	-0.937688	0.319604
-4.38592	-0.634882	0.148978	1.03973	0.611285	0.96389	-0.695721	-0.00873013	0.591208	-0.0394223	0.444496	-0.0221327	0.0893321	0.359155	0.221438	0.245196	0.847013	0.0986092	0.779612	0.251193	0.469475	-0.938744	0.320145
-4.38544	-0.635146	0.148767	1.0397	0.610612	0.964024	-0.694445	-0.00862983	0.591294	-0.0397765	0.444896	-0.0214681	0.0897245	0.359149	0.22185	0.245861	0.848111	0.0983926	0.779612	0.250905	0.469668	-0.938484	0.320301
-4.38496	-0.634816	0.148108	1.0393	0.610718	0.964116	-0.694515	-0.00932261	0.591237	-0.0405307	0.445239	-0.0215214	0.0895918	0.359299	0.221517	0.246111	0.84883	0.0983594	0.779721	0.25078	0.470047	-0.938938	0.320316
-4.38448	-0.634834	0.1483	1.03936	0.611044	0.964776	-0.693855	-0.00898373	0.591233	-0.0392928	0.445863	-0.0215636	0.0897502	0.359666	0.221593	0.246204	0.849241	0.098334	0.779995	0.250794	0.470419	-0.938781	0.320393
-4.384	-0.634768	0.148295	1.03958	0.610364	0.965537	-0.692982	-0.00874228	0.591322	-0.0390094	0.446617	-0.021566	0.090027	0.35994	0.221778	0.246725	0.850334	0.0981745	0.780306	0.250955	0.471048	-0.938577	0.320605
-4.38352	-0.634867	0.148052	1.03963	0.610372	0.965573	-0.692413	-0.00857183	0.591304	-0.0393279	0.446801	-0.0220137	0.0905876	0.360496	0.222343	0.246699	0.852175	0.0980591	0.779779	0.25108	0.471072	-0.938765	0.320574
-4.38304	-0.635256	0.148272	1.03929	0.610448	0.966457	-0.69219	-0.00869278	0.591234	-0.0393588	0.447025	-0.022042	0.0907395	0.360821	0.222312	0.246609	0.853482	0.0982496	0.779835	0.251152	0.471462	-0.938873	0.320521
-4.38256	-0.634912	0.148058	1.03938	0.610229	0.966864	-0.690828	-0.00861567	0.591265	-0.0390471	0.447194	-0.0218653	0.0902594	0.360887	0.222441	0.24688	0.853909	0.0980697	0.779932	0.250662	0.47203	-0.93925	0.320505
-4.38208	-0.635084	0.148134	1.03899	0.610135	0.967228	-0.690714	-0.00925738	0.591044	-0.039435	0.44717	-0.022119	0.0903663	0.360853	0.222876	0.247284	0.855301	0.0979425	0.780209	0.250509	0.472301	-0.939423	0.320652
-4.3816	-0.634615	0.147885	1.0388	0.610751	0.967673	-0.689534	-0.00945496	0.591229	-0.0388827	0.447359	-0.0217865	0.0904326	0.360834	0.222706	0.24826	0.855701	0.097858	0.78052	0.250514	0.472731	-0.939646	0.320827
-4.38112	-0.634091	0.147994	1.03883	0.61113	0.96844	-0.688821	-0.00876158	0.591404	-0.0389556	0.446885	-0.0222909	0.0907248	0.360644	0.223146	0.249311	0.856994	0.0978355	0.780679	0.250431	0.472952	-0.940198	0.321039
-4.38064	-0.633585	0.148189	1.03878	0.611482	0.968844	-0.688748	-0.00911608	0.591524	-0.0390461	0.447238	-0.0222266	0.0900294	0.36067	0.22335	0.250201	0.858778	0.0978508	0.780759	0.250441	0.473254	-0.940457	0.321019
-4.38016	-0.633378	0.147532	1.03849	0.612277	0.969644	-0.68846	-0.00894267	0.591489	-0.0388937	0.447406	-0.0219979	0.090184	0.360295	0.22329	0.250723	0.859446	0.0979437	0.780677	0.250115	0.473634	-0.940497	0.321119
-4.37968	-0.632815	0.14688	1.03799	0.61259	0.970431	-0.689074	-0.00943206	0.591499	-0.0395937	0.447127	-0.0222312	0.0898147	0.360688	0.223551	0.251795	0.860596	0.0981847	0.781055	0.250234	0.473821	-0.940464	0.320943
-4.3792	-0.632407	0.146811	1.03679	0.611833	0.970824	-0.68935	-0.00908847	0.591578	-0.0386831	0.447008	-0.0209788	0.0895159	0.361006	0.223447	0.251766	0.86123	0.0982742	0.781123	0.250406	0.473881	-0.940338	0.321182
-4.37872	-0.632603	0.146165	1.03671	0.611694	0.972099	-0.690247	-0.00929926	0.591588	-0.038642	0.446923	-0.0208987	0.0892768	0.361308	0.223331	0.251685	0.862372	0.0985078	0.781256	0.250498	0.47428	-0.939979	0.321335
-4.37824	-0.632592	0.145345	1.03632	0.611373	0.972605	-0.689277	-0.00935034	0.591597	-0.0384114	0.446795	-0.0209197	0.0893775	0.361832	0.223771	0.253012	0.864175	0.0983818	0.781619	0.250789	0.474798	-0.939948	0.321445
-4.37776	-0.632722	0.145305	1.03601	0.612371	0.973167	-0.68959	-0.00890536	0.591783	-0.0378517	0.446442	-0.0206465	0.0895071	0.362062	0.224213	0.253234	0.865005	0.0981428	0.781429	0.250767	0.475381	-0.938887	0.321479
-4.37728	-0.632702	0.144981	1.03547	0.613044	0.973322	-0.68958	-0.00937055	0.591719	-0.0380774	0.446274	-0.020256	0.0892036	0.362558	0.224361	0.253392	0.865912	0.0979099	0.781734	0.250631	0.475894	-0.938528	0.321682
-4.3768	-0.632581	0.145004	1.03468	0.613748	0.974109	-0.690859	-0.009649	0.59165	-0.0383286	0.446425	-0.0198289	0.0891669	0.362697	0.224492	0.25395	0.866484	0.0981919	0.781937	0.250581	0.476362	-0.938607	0.321381
-4.37632	-0.632175	0.145315	1.03321	0.614441	0.975169	-0.6908	-0.00967409	0.591523	-0.0388933	0.447042	-0.0198256	0.0893907	0.362532	0.224965	0.254338	0.867418	0.0981249	0.781652	0.250565	0.476676	-0.938433	0.321241
-4.37584	-0.630947	0.145058	1.03279	0.614459	0.975396	-0.690122	-0.0094468	0.59159	-0.0389579	0.446895	-0.0198809	0.0897317	0.362324	0.225016	0.254332	0.867531	0.0980116	0.781553	0.250818	0.477202	-0.938315	0.321301
-4.37536	-0.630259	0.145234	1.03179	0.614048	0.975973	-0.689737	-0.00891592	0.59171	-0.039253	0.447199	-0.0187336	0.0901332	0.362455	0.225741	0.254985	0.868185	0.0978857	0.781639	0.250941	0.477676	-0.938294	0.321629
-4.37488	-0.630191	0.145099	1.03132	0.614493	0.976784	-0.689255	-0.00851012	0.591704	-0.0394494	0.446646	-0.0181682	0.0904111	0.362498	0.226108	0.255286	0.868647	0.0975542	0.781987	0.251318	0.477839	-0.938448	0.321844
-4.3744	-0.628629	0.145605	1.0314	0.613492	0.977436	-0.689389	-0.00801367	0.591929	-0.0390884	0.447229	-0.0185512	0.0906966	0.362492	0.226608	0.255514	0.869286	0.0975254	0.782257	0.2513	0.477653	-0.937978	0.321559
-4.37392	-0.628125	0.145998	1.03125	0.613148	0.978558	-0.689419	-0.00799862	0.591818	-0.0391308	0.446806	-0.0179413	0.0903836	0.362587	0.227056	0.255346	0.869772	0.0975788	0.782741	0.251623	0.477743	-0.937633	0.321771
-4.37344	-0.627772	0.145957	1.03183	0.612045	0.978983	-0.689964	-0.00789181	0.591712	-0.0391947	0.447052	-0.017212	0.0906164	0.362555	0.227092	0.255733	0.870041	0.0976117	0.783014	0.251466	0.478014	-0.937527	0.321755
-4.37296	-0.627124	0.146112	1.03145	0.610429	0.979329	-0.688892	-0.0083104	0.591988	-0.0391038	0.44735	-0.017187	0.0907683	0.362596	0.227251	0.255952	0.870613	0.0972977	0.783397	0.251149	0.478436	-0.937125	0.32133
-4.37248	-0.626898	0.146585	1.03129	0.61016	0.979524	-0.689323	-0.00804028	0.59201	-0.0390987	0.447656	-0.0164441	0.0906068	0.362736	0.226965	0.255923	0.870906	0.0973295	0.783621	0.251199	0.479023	-0.93711	0.321303
-4.372	-0.62662	0.146788	1.03092	0.609104	0.980526	-0.690153	-0.00779001	0.592103	-0.0392289	0.447869	-0.0159677	0.0911296	0.362554	0.227225	0.25607	0.871193	0.0975491	0.784219	0.251079	0.479192	-0.937342	0.321511
-4.37152	-0.626711	0.146779	1.03008	0.607059	0.981604	-0.689241	-0.00726542	0.592076	-0.0396008	0.44763	-0.0152537	0.0912545	0.362427	0.227219	0.256015	0.871909	0.0975968	0.784225	0.250936	0.479116	-0.937068	0.321285
-4.37104	-0.625808	0.146715	1.03057	0.606595	0.982138	-0.688997	-0.00699661	0.592269	-0.0396697	0.447638	-0.0146953	0.0913097	0.362344	0.227059	0.25611	0.872323	0.0975607	0.784492	0.250881	0.479585	-0.937303	0.321567
-4.37056	-0.625394	0.146697	1.03007	0.60588	0.983187	-0.688037	-0.00682277	0.592462	-0.0401058	0.447758	-0.013971	0.0918205	0.362193	0.227264	0.256344	0.872537	0.0975546	0.784669	0.25109	0.479787	-0.937292	0.321584
-4.37008	-0.624669	0.147242	1.02965	0.605899	0.983736	-0.688553	-0.00688522	0.592593	-0.0398936	0.447944	-0.0140085	0.0917138	0.361779	0.227723	0.256389	0.872304	0.097522	0.784851	0.251182	0.480384	-0.936833	0.321491
-4.3696	-0.625527	0.147417	1.02952	0.604641	0.983977	-0.689624	-0.00697116	0.592819	-0.0407961	0.448222	-0.0147113	0.0920367	0.361846	0.227886	0.256665	0.87238	0.0980259	0.78539	0.2511	0.480737	-0.937206	0.321423
-4.36912	-0.625214	0.147084	1.02904	0.603949	0.984151	-0.690224	-0.00580045	0.59278	-0.0400222	0.44904	-0.0146576	0.0921343	0.361711	0.228373	0.257257	0.873166	0.0980156	0.78523	0.251085	0.480934	-0.937176	0.321038
-4.36864	-0.624664	0.147512	1.02839	0.603684	0.984829	-0.691339	-0.00584721	0.59293	-0.0401311	0.449075	-0.0133319	0.0927117	0.361783	0.228818	0.257692	0.872787	0.09779	0.785137	0.250784	0.481116	-0.937377	0.321334
-4.36816	-0.624042	0.146885	1.02925	0.603238	0.985499	-0.69176	-0.00507991	0.592895	-0.0405334	0.44947	-0.0122921	0.0922578	0.361706	0.228978	0.258172	0.873492	0.0978723	0.784976	0.251319	0.48142	-0.936881	0.321562
-4.36768	-0.623937	0.147675	1.02965	0.60266	0.985988	-0.691789	-0.00407133	0.593119	-0.0414048	0.449451	-0.011893	0.0921985	0.361832	0.229502	0.258464	0.873614	0.0979407	0.785017	0.251165	0.481473	-0.937215	0.321562
-4.3672	-0.624029	0.148144	1.0294	0.601749	0.986579	-0.692908	-0.00426815	0.593461	-0.0413547	0.449161	-0.0111583	0.0917861	0.361749	0.229629	0.258277	0.873222	0.097913	0.785149	0.251096	0.481532	-0.937595	0.321315
-4.36672	-0.623088	0.148305	1.02975	0.601221	0.987098	-0.692859	-0.00364197	0.593564	-0.0411849	0.449251	-0.0103482	0.0918971	0.361751	0.229662	0.258351	0.873446	0.0978381	0.785312	0.251024	0.48163	-0.937707	0.321136
-4.36624	-0.622508	0.148145	1.02963	0.60059	0.988072	-0.693013	-0.00390151	0.593726	-0.041237	0.449425	-0.0100248	0.0919167	0.361583	0.229611	0.258821	0.873805	0.0977867	0.785447	0.251071	0.481639	-0.937822	0.321291
-4.36576	-0.622598	0.148063	1.02946	0.600904	0.988438	-0.692732	-0.00388843	0.593642	-0.0411456	0.449535	-0.00916384	0.0921539	0.361399	0.229726	0.259027	0.874079	0.0977082	0.785682	0.251051	0.482153	-0.937854	0.322041
-4.36528	-0.62268	0.147718	1.02925	0.600853	0.988882	-0.692786	-0.00393808	0.593701	-0.0409955	0.450345	-0.00859318	0.0925505	0.361169	0.229506	0.259132	0.874678	0.0976471	0.786025	0.25095	0.482078	-0.937646	0.322202
-4.3648	-0.622675	0.147725	1.02952	0.601191	0.989746	-0.694017	-0.0036396	0.593602	-0.0410188	0.45153	-0.00796395	0.0927264	0.361044	0.229823	0.259395	0.875479	0.0975274	0.78668	0.250994	0.481904	-0.93771	0.322078
-4.36432	-0.62218	0.147982	1.02938	0.601969	0.990189	-0.695807	-0.00384628	0.593597	-0.0413408	0.451708	-0.00713869	0.0932691	0.360897	0.230201	0.259987	0.875421	0.0973722	0.786846	0.250691	0.481971	-0.937327	0.322132
-4.36384	-0.621151	0.148284	1.02962	0.602527	0.991167	-0.696159	-0.00347029	0.593629	-0.0408881	0.451708	-0.00679011	0.0932876	0.360811	0.230041	0.259528	0.875311	0.0976791	0.787146	0.250625	0.481817	-0.937968	0.322044
-4.36336	-0.621511	0.148492	1.03028	0.602087	0.991418	-0.695625	-0.00240024	0.593527	-0.0406261	0.452157	-0.00650768	0.0937153	0.36099	0.229685	0.260148	0.875815	0.0976796	0.787386	0.250366	0.481503	-0.937816	0.321914
-4.36288	-0.62238	0.148761	1.02966	0.602048	0.991757	-0.695834	-0.00217419	0.593463	-0.0404148	0.452774	-0.00612814	0.0939171	0.360777	0.229413	0.260346	0.877021	0.0976779	0.787752	0.250481	0.481357	-0.937237	0.321835
-4.3624	-0.623163	0.14891	1.02927	0.601864	0.992735	-0.69679	-0.000968535	0.593423	-0.0403803	0.453425	-0.00586284	0.09381	0.360448	0.229018	0.259802	0.878316	0.0976434	0.787605	0.250628	0.481422	-0.937299	0.321912
-4.36192	-0.623292	0.149587	1.02957	0.60066	0.993301	-0.696717	-0.00033372	0.593448	-0.0402322	0.454266	-0.00522817	0.0943749	0.359868	0.228587	0.26062	0.877968	0.0976388	0.787761	0.250752	0.480603	-0.936675	0.322106
-4.36144	-0.623449	0.149548	1.02941	0.599592	0.994355	-0.697834	6.84368e-05	0.593288	-0.0394436	0.454797	-0.00510243	0.0954095	0.359588	0.228437	0.260979	0.878995	0.0977199	0.788013	0.250886	0.480362	-0.936923	0.322309
-4.36096	-0.623854	0.150288	1.03028	0.59914	0.994723	-0.69795	0.000314494	0.593241	-0.0394456	0.455877	-0.00555891	0.0953892	0.35925	0.228329	0.260351	0.879191	0.0973869	0.788275	0.250823	0.480469	-0.937214	0.322382
-4.36048	-0.624336	0.15008	1.03006	0.598879	0.99523	-0.698495	0.000764135	0.593106	-0.0393732	0.456568	-0.00502604	0.0955876	0.358689	0.228142	0.259962	0.879379	0.0977678	0.788286	0.251364	0.480718	-0.937481	0.322411
-4.36	-0.623996	0.150912	1.03025	0.59779	0.995822	-0.699967	0.00148563	0.593133	-0.0393238	0.457341	-0.00489832	0.0951272	0.358247	0.228195	0.259918	0.87969	0.0978815	0.788349	0.251407	0.480608	-0.937309	0.322288
-4.35952	-0.623806	0.151254	1.03017	0.597228	0.996487	-0.700872	0.00196791	0.593234	-0.0396334	0.458008	-0.00468861	0.095251	0.357967	0.228282	0.259606	0.879815	0.0978001	0.788651	0.251208	0.480772	-0.93777	0.322279
-4.35904	-0.624238	0.152107	1.02988	0.596209	0.996852	-0.701145	0.00169097	0.593032	-0.0395561	0.459265	-0.00431304	0.0956921	0.357631	0.228154	0.260345	0.880983	0.097846	0.788566	0.251219	0.480812	-0.938175	0.32255
-4.35856	-0.62468	0.152705	1.03033	0.595797	0.997675	-0.70041	0.00146033	0.592988	-0.0396595	0.459656	-0.00461871	0.0964264	0.357537	0.228275	0.260794	0.880867	0.0979166	0.788578	0.251368	0.480664	-0.938924	0.322527
-4.35808	-0.623599	0.153197	1.0305	0.596476	0.998667	-0.700301	0.000913914	0.592999	-0.0400849	0.460452	-0.00424715	0.0965157	0.357013	0.228326	0.261344	0.880469	0.0979875	0.788979	0.251095	0.480927	-0.938837	0.322448
-4.3576	-0.62263	0.15292	1.03053	0.595405	0.998735	-0.700907	0.00145721	0.592965	-0.0402647	0.460885	-0.00412205	0.0963748	0.356403	0.228643	0.261722	0.879637	0.0978704	0.789042	0.251216	0.480583	-0.938417	0.322349
-4.35712	-0.621992	0.153262	1.03046	0.594903	0.999374	-0.700872	0.00216895	0.592867	-0.0406965	0.461095	-0.00314252	0.0961784	0.356166	0.228562	0.262007	0.879442	0.0980574	0.789438	0.250996	0.480354	-0.938359	0.322406
-4.35664	-0.621841	0.153703	1.03026	0.595261	1.00013	-0.699131	0.00214912	0.592962	-0.0412222	0.461346	-0.00335416	0.0968934	0.356182	0.228849	0.262554	0.879349	0.0978457	0.789435	0.250884	0.480215	-0.938683	0.322384
-4.35616	-0.621867	0.154237	1.03052	0.594948	1.00051	-0.698807	0.00199492	0.59323	-0.0413261	0.461878	-0.00233752	0.0974867	0.355541	0.228775	0.262596	0.880337	0.0978289	0.789482	0.250609	0.48027	-0.938733	0.322076
-4.35568	-0.621055	0.154517	1.03071	0.594852	1.00104	-0.699617	0.00190744	0.593294	-0.0416968	0.462504	-0.00226093	0.0976712	0.35499	0.229011	0.262474	0.879757	0.0977291	0.788932	0.250885	0.480391	-0.938777	0.322279
-4.3552	-0.620677	0.154875	1.03093	0.595434	1.00199	-0.699924	0.0019191	0.593367	-0.0424031	0.463145	-0.00204507	0.0981025	0.354875	0.228962	0.262057	0.880026	0.0975075	0.788882	0.250802	0.480411	-0.939324	0.32201
-4.35472	-0.621026	0.155538	1.03183	0.595871	1.00257	-0.700216	0.00233625	0.59366	-0.0424605	0.463859	-0.00149348	0.0984709	0.354201	0.228876	0.261951	0.879405	0.0972379	0.789015	0.250781	0.480761	-0.939979	0.321911
-4.35424	-0.621098	0.155462	1.03287	0.595463	1.0032	-0.699621	0.00172121	0.593784	-0.04269	0.464247	-0.000634379	0.0988836	0.353981	0.228891	0.262186	0.879085	0.0970941	0.789059	0.250461	0.480965	-0.940756	0.320988
-4.35376	-0.620618	0.1565	1.03327	0.594308	1.00316	-0.700907	0.00148564	0.594145	-0.0428722	0.464696	-0.000447756	0.0990304	0.353689	0.229433	0.262197	0.878885	0.0970637	0.788715	0.250634	0.481003	-0.941307	0.321159
-4.35328	-0.621029	0.156927	1.03334	0.593938	1.0041	-0.701503	0.00170358	0.594261	-0.043542	0.465477	0.000100074	0.0996126	0.353685	0.229761	0.261827	0.879164	0.0970659	0.788788	0.250647	0.48099	-0.94171	0.321124
-4.3528	-0.62102	0.157176	1.03355	0.592722	1.00482	-0.701923	0.00176121	0.594289	-0.0441297	0.46586	0.000131533	0.10064	0.353728	0.230287	0.26182	0.878797	0.0971064	0.788753	0.250936	0.480974	-0.94161	0.32112
-4.35232	-0.62052	0.157364	1.03335	0.593097	1.00493	-0.702301	0.00267608	0.594284	-0.0450007	0.466035	-3.19047e-05	0.101493	0.354127	0.230729	0.261188	0.878781	0.0972802	0.788478	0.250551	0.481075	-0.941604	0.321056
-4.35184	-0.619755	0.157329	1.0339	0.592912	1.00547	-0.701805	0.00281071	0.594238	-0.0459494	0.466616	-0.000936285	0.101674	0.354227	0.230698	0.261487	0.878809	0.0970329	0.78829	0.250421	0.481002	-0.941821	0.32081
-4.35136	-0.619639	0.157781	1.03514	0.59302	1.00547	-0.703064	0.00344036	0.594399	-0.0461973	0.466907	-0.000620755	0.102147	0.354113	0.231231	0.26136	0.880101	0.0968623	0.788535	0.250372	0.480691	-0.942193	0.320559
-4.35088	-0.619624	0.157875	1.03632	0.592511	1.0061	-0.703011	0.00408269	0.594213	-0.0467971	0.467204	-0.0015396	0.102431	0.354164	0.231781	0.261199	0.880283	0.096469	0.788424	0.2505	0.480593	-0.942606	0.320186
-4.3504	-0.619071	0.157904	1.03684	0.591975	1.00661	-0.703426	0.0040829	0.594213	-0.0472016	0.467431	-0.00295114	0.103205	0.354315	0.232164	0.261368	0.880852	0.0962382	0.788353	0.250344	0.480504	-0.94327	0.319982
-4.34992	-0.618352	0.158475	1.03714	0.590978	1.00702	-0.70323	0.00479876	0.594244	-0.0478957	0.467913	-0.00279969	0.102633	0.35432	0.23261	0.261206	0.880978	0.0962274	0.788332	0.250538	0.480859	-0.943151	0.319711
-4.34944	-0.618316	0.158962	1.0373	0.590248	1.00739	-0.703091	0.00516753	0.59428	-0.048567	0.468667	-0.00282139	0.10328	0.354154	0.232611	0.261223	0.880494	0.0963133	0.788568	0.250793	0.480597	-0.943154	0.31905
-4.34896	-0.618202	0.160049	1.03785	0.588915	1.00778	-0.703935	0.00537675	0.594414	-0.0491257	0.468768	-0.00322228	0.103612	0.35406	0.233112	0.260827	0.880691	0.0959119	0.78847	0.250863	0.480394	-0.942964	0.318765
-4.34848	-0.617712	0.161141	1.03796	0.588564	1.00801	-0.705181	0.00570104	0.594379	-0.048721	0.468637	-0.00298914	0.103719	0.354126	0.23344	0.260238	0.881399	0.0958004	0.788398	0.251018	0.480375	-0.943002	0.318546
-4.348	-0.61722	0.161422	1.03817	0.587587	1.0088	-0.706545	0.00622686	0.594505	-0.0487485	0.46922	-0.00269427	0.104373	0.354581	0.233736	0.260395	0.88145	0.0960079	0.788343	0.251159	0.479956	-0.942939	0.318431
-4.34752	-0.616756	0.162127	1.03818	0.58533	1.00917	-0.708764	0.0063702	0.594722	-0.0485173	0.470412	-0.00280519	0.104728	0.354407	0.23418	0.260501	0.882365	0.0960697	0.788135	0.251105	0.479758	-0.943148	0.318226
-4.34704	-0.616094	0.162629	1.03836	0.584753	1.00911	-0.709923	0.00682719	0.594911	-0.0489229	0.470842	-0.003058	0.105429	0.354422	0.234325	0.260283	0.881882	0.0962331	0.788128	0.251086	0.479878	-0.943465	0.318213
-4.34656	-0.615801	0.162835	1.03875	0.583074	1.00986	-0.710085	0.00710746	0.59494	-0.0484792	0.471049	-0.00327692	0.105063	0.354509	0.234427	0.260375	0.882827	0.0963799	0.788149	0.250896	0.479913	-0.944671	0.318283
-4.34608	-0.615806	0.163605	1.03901	0.58251	1.01049	-0.711716	0.00783165	0.594941	-0.0490761	0.471493	-0.00369659	0.105318	0.354746	0.234858	0.260389	0.883451	0.0961444	0.788164	0.251193	0.479684	-0.944927	0.31838
-4.3456	-0.616019	0.164197	1.03952	0.583055	1.0113	-0.712747	0.00785524	0.595267	-0.0495338	0.472025	-0.00333514	0.105235	0.354701	0.235275	0.260434	0.884218	0.0962221	0.788153	0.251159	0.479862	-0.945355	0.318231
-4.34512	-0.616536	0.164471	1.03969	0.581903	1.01214	-0.713116	0.00836184	0.595474	-0.0503553	0.472804	-0.00337938	0.106007	0.354305	0.235306	0.260558	0.884459	0.0964101	0.787846	0.250695	0.479435	-0.945617	0.318063
-4.34464	-0.617002	0.165202	1.03942	0.581172	1.01285	-0.713166	0.00828888	0.595824	-0.0504638	0.473335	-0.00380598	0.106273	0.354393	0.235125	0.260724	0.885154	0.096436	0.787512	0.250819	0.479697	-0.946139	0.317776
-4.34416	-0.617113	0.165462	1.03944	0.579871	1.01393	-0.71343	0.00860932	0.595884	-0.050503	0.474167	-0.00366578	0.106607	0.354611	0.235913	0.260251	0.884498	0.0965835	0.787464	0.250637	0.479714	-0.946547	0.31767
-4.34368	-0.616706	0.166082	1.0391	0.579107	1.01459	-0.714043	0.00886716	0.596137	-0.0497988	0.474606	-0.0036681	0.106549	0.354489	0.236196	0.260196	0.885195	0.0967357	0.787581	0.250708	0.479852	-0.947353	0.317594
-4.3432	-0.617576	0.166184	1.03925	0.578579	1.01544	-0.714536	0.00957485	0.596078	-0.0499978	0.474987	-0.00386077	0.106145	0.354435	0.236107	0.26007	0.885661	0.0965494	0.788123	0.250736	0.480212	-0.948049	0.317295
-4.34272	-0.617775	0.166232	1.03905	0.576862	1.01606	-0.714984	0.0103075	0.596519	-0.0501782	0.475749	-0.0039598	0.106556	0.354105	0.236106	0.259128	0.885658	0.0965091	0.788012	0.25087	0.479936	-0.94813	0.317303
-4.34224	-0.618102	0.167035	1.0392	0.576417	1.01706	-0.714639	0.0113773	0.596794	-0.0507989	0.47607	-0.00407856	0.107244	0.354125	0.235698	0.259305	0.885146	0.0966409	0.788199	0.250656	0.479729	-0.948858	0.317086
-4.34176	-0.618549	0.167123	1.03916	0.575044	1.01827	-0.714723	0.0118986	0.596747	-0.0512322	0.476872	-0.00508024	0.107696	0.354135	0.235447	0.258911	0.8865	0.0967778	0.788293	0.250358	0.479314	-0.949406	0.317235
-4.34128	-0.618029	0.167549	1.03887	0.573809	1.01932	-0.716423	0.012584	0.596953	-0.0517508	0.477577	-0.00572071	0.1077	0.354134	0.235333	0.258129	0.887639	0.0969705	0.788405	0.250339	0.478937	-0.950225	0.317107
-4.3408	-0.618647	0.167952	1.03794	0.573374	1.02029	-0.716279	0.0132613	0.597291	-0.0520339	0.478121	-0.0055977	0.107496	0.354789	0.235296	0.258334	0.887244	0.09683	0.788643	0.250489	0.478612	-0.951038	0.317293
-4.34032	-0.618637	0.168461	1.03764	0.571915	1.02139	-0.716493	0.0138222	0.597431	-0.0516207	0.478495	-0.00528009	0.108274	0.355021	0.234876	0.257996	0.887811	0.0967125	0.788636	0.250661	0.478445	-0.951286	0.317358
-4.33984	-0.619074	0.169139	1.03744	0.57012	1.02312	-0.718251	0.0141053	0.597592	-0.0515442	0.478738	-0.00566542	0.108714	0.355028	0.235024	0.257338	0.888419	0.0965221	0.788535	0.250767	0.478527	-0.951299	0.317681
-4.33936	-0.618731	0.169739	1.03788	0.568382	1.02467	-0.71941	0.0147998	0.597866	-0.051227	0.478875	-0.00497605	0.109275	0.354806	0.235113	0.257239	0.888719	0.0966195	0.788436	0.25064	0.478454	-0.951607	0.318042
-4.33888	-0.61845	0.16965	1.0374	0.567004	1.02516	-0.720335	0.0157393	0.597938	-0.0507144	0.478827	-0.00470451	0.110195	0.354653	0.234941	0.257096	0.889068	0.0967591	0.78869	0.250662	0.478152	-0.952216	0.317902
-4.3384	-0.61847	0.16974	1.03725	0.566147	1.02633	-0.720465	0.0159372	0.597737	-0.0505937	0.479337	-0.00512353	0.110516	0.354762	0.234847	0.256202	0.889123	0.0968166	0.788886	0.250583	0.478143	-0.953253	0.317982
-4.33792	-0.617661	0.170001	1.03747	0.5654	1.02686	-0.721278	0.0162389	0.5979	-0.0501655	0.479956	-0.00504357	0.111082	0.354758	0.234485	0.255669	0.890086	0.0968466	0.788803	0.250643	0.478303	-0.953514	0.317603
-4.33744	-0.618155	0.170067	1.03742	0.564798	1.02832	-0.723189	0.0171419	0.597923	-0.0495356	0.480887	-0.00533374	0.11145	0.354414	0.234138	0.255511	0.890617	0.0966811	0.788933	0.250705	0.477926	-0.954437	0.317359
-4.33696	-0.617601	0.17034	1.03738	0.562962	1.02921	-0.724135	0.0179218	0.597794	-0.0506372	0.481669	-0.00614419	0.111672	0.354166	0.234183	0.255235	0.891293	0.0968888	0.789049	0.250726	0.477941	-0.955905	0.317529
-4.33648	-0.616856	0.170484	1.03734	0.561644	1.02997	-0.725149	0.0183848	0.59783	-0.0513207	0.482456	-0.00712006	0.111845	0.353967	0.234247	0.25507	0.891616	0.0966633	0.789035	0.250865	0.477673	-0.957149	0.317776
-4.336	-0.616982	0.171243	1.0372	0.561053	1.03101	-0.726267	0.0187615	0.598018	-0.05129	0.482995	-0.00743901	0.111907	0.353989	0.234055	0.255499	0.891499	0.0964349	0.789366	0.250817	0.477346	-0.957431	0.317646
-4.33552	-0.616654	0.171431	1.03732	0.56029	1.03178	-0.727153	0.0198576	0.597868	-0.0509119	0.483704	-0.00726076	0.111619	0.354308	0.233748	0.255566	0.891129	0.0962632	0.789468	0.250505	0.477576	-0.957913	0.317719
-4.33504	-0.615721	0.172243	1.03723	0.560736	1.03302	-0.728883	0.020615	0.59809	-0.0506564	0.48403	-0.00782167	0.111967	0.354234	0.233616	0.255966	0.891199	0.0961292	0.78966	0.250559	0.477225	-0.958523	0.317333
-4.33456	-0.615177	0.172726	1.03695	0.560616	1.03446	-0.729638	0.0221498	0.598142	-0.0495299	0.484702	-0.00794899	0.112007	0.354062	0.233254	0.256241	0.892258	0.0958497	0.78966	0.25044	0.476972	-0.959092	0.317193
-4.33408	-0.614903	0.173215	1.03667	0.559641	1.03512	-0.730048	0.0228624	0.598161	-0.0502332	0.484791	-0.00741424	0.112046	0.354368	0.233253	0.255855	0.892299	0.0958108	0.789616	0.250396	0.476973	-0.959648	0.317238
-4.3336	-0.615243	0.173496	1.03631	0.557564	1.03625	-0.72842	0.0234375	0.597943	-0.049681	0.485513	-0.00711332	0.11319	0.35437	0.233373	0.256528	0.893075	0.0955758	0.789413	0.250365	0.476546	-0.960431	0.316808
-4.33312	-0.614538	0.1738	1.03582	0.556045	1.03786	-0.728554	0.0240951	0.597923	-0.0499644	0.485719	-0.00688275	0.11304	0.354379	0.233654	0.256105	0.894132	0.0955071	0.789399	0.250102	0.476442	-0.961038	0.316376
-4.33264	-0.61397	0.174304	1.03523	0.555198	1.03891	-0.729846	0.0247893	0.598045	-0.0495665	0.486476	-0.00662073	0.113601	0.354168	0.233523	0.256606	0.893948	0.0952026	0.789829	0.249978	0.476142	-0.962457	0.316343
-4.33216	-0.613577	0.175112	1.03496	0.555244	1.04009	-0.73085	0.0257811	0.597744	-0.0497146	0.486865	-0.00626195	0.114084	0.35413	0.233657	0.257469	0.893714	0.0949465	0.79003	0.249798	0.475673	-0.96351	0.316032
-4.33168	-0.614182	0.17624	1.03486	0.554424	1.04076	-0.730758	0.0258223	0.597849	-0.0497142	0.487548	-0.00649712	0.114103	0.354236	0.23357	0.2576	0.894311	0.0947953	0.790022	0.249845	0.475567	-0.963971	0.3159
-4.3312	-0.613955	0.176866	1.03414	0.55209	1.04213	-0.731582	0.0271424	0.59787	-0.0499444	0.488144	-0.00735999	0.113304	0.354364	0.233577	0.258137	0.89422	0.0948626	0.79002	0.249542	0.475515	-0.964895	0.31594
-4.33072	-0.613577	0.177577	1.03314	0.551064	1.04396	-0.731969	0.0272904	0.597689	-0.0502682	0.488779	-0.00701647	0.112665	0.354676	0.234013	0.258557	0.894385	0.0950168	0.790147	0.249695	0.474867	-0.965758	0.315924
-4.33024	-0.612874	0.178284	1.03268	0.550402	1.04534	-0.732201	0.0273714	0.597575	-0.050122	0.488949	-0.00689712	0.113082	0.354897	0.234438	0.259488	0.894826	0.0949242	0.790295	0.249612	0.474562	-0.966267	0.31611
-4.32976	-0.612704	0.178739	1.03191	0.548992	1.04615	-0.732232	0.0278836	0.597478	-0.050496	0.489486	-0.00603346	0.113009	0.355245	0.234469	0.259637	0.894817	0.0947297	0.790261	0.249555	0.474356	-0.966315	0.316028
-4.32928	-0.6123	0.178867	1.03195	0.549789	1.04756	-0.731055	0.0276499	0.597296	-0.0508903	0.489923	-0.00611243	0.113171	0.355472	0.233704	0.259645	0.89433	0.0947092	0.790508	0.249433	0.474044	-0.966561	0.31586
-4.3288	-0.611992	0.179315	1.0319	0.549641	1.04862	-0.731087	0.0281257	0.597203	-0.0502362	0.490437	-0.00597253	0.113209	0.355664	0.233268	0.25985	0.894375	0.0941748	0.790393	0.249221	0.473785	-0.967335	0.315757
-4.32832	-0.611853	0.17985	1.03132	0.548357	1.05003	-0.732283	0.028261	0.597063	-0.0504274	0.490649	-0.00624248	0.113507	0.355823	0.23343	0.25995	0.895211	0.094125	0.790775	0.248767	0.473683	-0.967762	0.315485
-4.32784	-0.612466	0.180353	1.03058	0.547077	1.05114	-0.73046	0.0292316	0.597113	-0.0503883	0.490659	-0.00680978	0.114169	0.356251	0.2331	0.260105	0.895328	0.094246	0.791048	0.248601	0.473633	-0.968473	0.315071
-4.32736	-0.612995	0.180489	1.03017	0.54547	1.05245	-0.732142	0.029399	0.597017	-0.0503907	0.491249	-0.00651407	0.114052	0.356542	0.232538	0.259948	0.894558	0.0940285	0.791754	0.248619	0.473116	-0.969334	0.314627
-4.32688	-0.612587	0.181066	1.03013	0.544377	1.05395	-0.733573	0.0297988	0.597012	-0.0506985	0.491752	-0.00628702	0.114454	0.357072	0.232189	0.25984	0.895381	0.0941024	0.792281	0.248527	0.472665	-0.969839	0.314557
-4.3264	-0.612428	0.181363	1.02977	0.543692	1.05508	-0.735628	0.0302739	0.597005	-0.0503922	0.492523	-0.006527	0.114608	0.357132	0.231772	0.260398	0.895675	0.0939255	0.792502	0.248848	0.472376	-0.970125	0.314649
-4.32592	-0.612009	0.181376	1.02925	0.543351	1.05615	-0.736377	0.0309133	0.596953	-0.0502845	0.493038	-0.00623326	0.11541	0.357179	0.231573	0.260381	0.895971	0.0936478	0.792893	0.248909	0.472131	-0.970385	0.314462
-4.32544	-0.611295	0.181489	1.02836	0.543548	1.05763	-0.73671	0.0311934	0.596628	-0.0498818	0.493775	-0.00701498	0.115968	0.357868	0.231131	0.26014	0.896031	0.0937686	0.793423	0.248969	0.47206	-0.970521	0.314088
-4.32496	-0.612436	0.181386	1.02702	0.542794	1.05838	-0.736877	0.0318429	0.596469	-0.0502021	0.494035	-0.00726853	0.11523	0.358247	0.230936	0.259687	0.896366	0.0932109	0.793797	0.249602	0.471774	-0.970379	0.31377
-4.32448	-0.611459	0.181616	1.02665	0.541777	1.05948	-0.737799	0.0318434	0.596453	-0.0507928	0.494817	-0.00654325	0.115296	0.35854	0.23089	0.259901	0.8967	0.0931122	0.793932	0.249545	0.471467	-0.970337	0.313829
-4.324	-0.611061	0.181978	1.02666	0.541015	1.06071	-0.737502	0.0323675	0.596527	-0.0513632	0.495173	-0.00585566	0.115639	0.358707	0.23054	0.259331	0.896905	0.0930684	0.794106	0.249436	0.471192	-0.970623	0.31339
-4.32352	-0.610692	0.182058	1.02561	0.54046	1.06136	-0.738647	0.0326525	0.5963	-0.050915	0.495795	-0.00588846	0.116059	0.359095	0.230883	0.259626	0.897509	0.0925834	0.794223	0.249058	0.470647	-0.970155	0.313007
-4.32304	-0.609595	0.182109	1.02547	0.54038	1.06242	-0.740126	0.0320326	0.59615	-0.0510518	0.495967	-0.00540478	0.116018	0.359195	0.230748	0.259568	0.898094	0.0923201	0.795075	0.248909	0.470523	-0.970454	0.313042
-4.32256	-0.609447	0.18203	1.02465	0.539734	1.06353	-0.741448	0.0319803	0.595812	-0.0508363	0.49631	-0.00530689	0.115876	0.359097	0.230923	0.259448	0.898047	0.0922688	0.795647	0.24924	0.469798	-0.970384	0.312997
-4.32208	-0.609329	0.182333	1.02424	0.539315	1.06435	-0.742554	0.032096	0.595632	-0.0508139	0.496348	-0.00540374	0.115547	0.35937	0.230741	0.258963	0.897664	0.0922221	0.796142	0.248684	0.469547	-0.97024	0.31261
-4.3216	-0.608893	0.182266	1.02359	0.538399	1.06503	-0.743137	0.0328022	0.595412	-0.0505966	0.49666	-0.00652705	0.115831	0.359485	0.230384	0.25893	0.897712	0.0920948	0.796352	0.248639	0.469305	-0.970518	0.312487
-4.32112	-0.609322	0.182267	1.02294	0.538866	1.06536	-0.743681	0.0331975	0.59558	-0.0513098	0.496765	-0.0062781	0.116423	0.359555	0.230387	0.258486	0.897635	0.0919823	0.796933	0.248923	0.468761	-0.970409	0.312665
-4.32064	-0.608736	0.182528	1.02223	0.539347	1.0659	-0.744783	0.0336171	0.595686	-0.0509133	0.496866	-0.00667874	0.11642	0.359404	0.230272	0.259243	0.897569	0.0918464	0.797539	0.249063	0.468039	-0.970679	0.312562
-4.32016	-0.609005	0.182573	1.0218	0.538814	1.06634	-0.745674	0.0345355	0.595787	-0.0507695	0.497051	-0.00664629	0.116369	0.35954	0.230486	0.259422	0.897702	0.0918239	0.797878	0.248652	0.467644	-0.97045	0.312036
-4.31968	-0.608455	0.182313	1.02154	0.538089	1.06699	-0.746702	0.0348149	0.595929	-0.0509863	0.497209	-0.00588613	0.116423	0.359713	0.229908	0.260108	0.897664	0.0914935	0.79821	0.248703	0.467359	-0.970082	0.31195
-4.3192	-0.608331	0.181763	1.02086	0.537884	1.06827	-0.746065	0.0352026	0.595934	-0.0510162	0.497511	-0.00618154	0.117033	0.359435	0.230016	0.260227	0.897415	0.0914945	0.798657	0.248416	0.467272	-0.970003	0.31189
-4.31872	-0.607957	0.181532	1.02072	0.537735	1.06916	-0.746872	0.0351749	0.595598	-0.0507083	0.497984	-0.00598506	0.117266	0.359666	0.230014	0.259877	0.897437	0.0913829	0.799088	0.248201	0.46689	-0.969896	0.311801
-4.31824	-0.608024	0.181176	1.02042	0.537364	1.07053	-0.747975	0.0345837	0.595743	-0.0509911	0.498672	-0.00556396	0.117172	0.359546	0.230138	0.259845	0.897518	0.0913565	0.799699	0.2482	0.466086	-0.969161	0.3117
-4.31776	-0.606733	0.181308	1.02009	0.53762	1.07093	-0.747924	0.0345661	0.595828	-0.0507568	0.498489	-0.00663415	0.117333	0.359186	0.229923	0.260284	0.898694	0.0912407	0.800426	0.248436	0.465918	-0.968999	0.31184
-4.31728	-0.604956	0.181332	1.01972	0.537752	1.07177	-0.748847	0.0345941	0.595515	-0.0507543	0.49829	-0.00838005	0.117423	0.359127	0.229929	0.260781	0.89908	0.0908178	0.800818	0.248732	0.465682	-0.969221	0.312235
-4.3168	-0.604307	0.180865	1.01941	0.538169	1.07258	-0.749393	0.034678	0.595529	-0.0506683	0.498902	-0.00861369	0.118044	0.359452	0.230062	0.261111	0.899509	0.0906747	0.801251	0.248816	0.465332	-0.968703	0.312156
-4.31632	-0.603797	0.180635	1.01944	0.538046	1.07347	-0.749755	0.0350692	0.595792	-0.0514271	0.498945	-0.00892357	0.118625	0.359295	0.229733	0.261183	0.899783	0.0905572	0.801318	0.249019	0.464754	-0.968138	0.312338
-4.31584	-0.602879	0.180799	1.01935	0.538446	1.0745	-0.750308	0.0352119	0.595804	-0.0509522	0.498886	-0.00928126	0.119457	0.359407	0.229633	0.261207	0.900073	0.0906101	0.802081	0.249001	0.464484	-0.967893	0.31191
-4.31536	-0.601986	0.180799	1.01897	0.537877	1.07584	-0.750223	0.0355847	0.59584	-0.051214	0.499122	-0.0106722	0.119841	0.359252	0.229814	0.260982	0.901038	0.0905435	0.802734	0.249048	0.464305	-0.967748	0.311637
-4.31488	-0.600882	0.180762	1.01903	0.537581	1.07676	-0.750862	0.0358876	0.595935	-0.0511136	0.499664	-0.00997831	0.119787	0.359214	0.230194	0.261139	0.902022	0.090452	0.803391	0.249124	0.463888	-0.967614	0.311434
-4.3144	-0.599822	0.180713	1.01884	0.537896	1.07777	-0.751057	0.0359524	0.596138	-0.0517665	0.499757	-0.00888626	0.119865	0.35928	0.229706	0.261618	0.902663	0.0905121	0.803686	0.249195	0.463376	-0.967365	0.311476
-4.31392	-0.599975	0.18083	1.01919	0.538196	1.07847	-0.750974	0.0365096	0.596263	-0.0516796	0.499895	-0.00804772	0.119724	0.359169	0.229691	0.261591	0.903599	0.0902658	0.804186	0.249536	0.462955	-0.967114	0.311503
-4.31344	-0.598423	0.180571	1.01899	0.539336	1.0796	-0.749934	0.0368751	0.596242	-0.0514972	0.499904	-0.00788543	0.120073	0.35964	0.228993	0.261891	0.903881	0.0904473	0.804446	0.249453	0.462626	-0.967274	0.311108
-4.31296	-0.598436	0.180454	1.01872	0.539674	1.08056	-0.750263	0.0374571	0.596165	-0.0521221	0.500294	-0.00698724	0.119826	0.359412	0.228814	0.261547	0.904798	0.0905453	0.805124	0.249529	0.462396	-0.967158	0.311153
-4.31248	-0.598203	0.179779	1.01811	0.539928	1.08148	-0.750395	0.0373771	0.59612	-0.0518162	0.500648	-0.00619537	0.12029	0.35979	0.22855	0.261956	0.90477	0.0906043	0.805344	0.249546	0.461787	-0.966461	0.310873
-4.312	-0.598417	0.179454	1.01742	0.54112	1.08353	-0.750876	0.0374435	0.596249	-0.0516207	0.501216	-0.00449986	0.120574	0.360212	0.228719	0.26157	0.904592	0.0906143	0.805817	0.249665	0.461521	-0.967001	0.310871
-4.31152	-0.598322	0.179244	1.01657	0.541743	1.08452	-0.750087	0.0379118	0.596171	-0.0518181	0.501241	-0.00291621	0.120894	0.36017	0.228993	0.261156	0.905737	0.0905994	0.805819	0.249454	0.461453	-0.966217	0.310912
-4.31104	-0.597764	0.178559	1.01642	0.542092	1.08563	-0.750544	0.0380308	0.595926	-0.0530511	0.501503	-0.00283442	0.121122	0.35982	0.22911	0.260383	0.906129	0.090906	0.806187	0.249346	0.461395	-0.966632	0.311121
-4.31056	-0.597717	0.178253	1.01578	0.542762	1.08664	-0.749795	0.0386117	0.596026	-0.0543038	0.5019	-0.000923553	0.121603	0.359534	0.22963	0.2605	0.906094	0.0909886	0.806327	0.249205	0.460793	-0.965912	0.311085
-4.31008	-0.597982	0.178089	1.01587	0.542098	1.08755	-0.749404	0.0394402	0.596279	-0.0548295	0.502276	-0.00146351	0.121574	0.35947	0.22959	0.260834	0.906142	0.091141	0.806761	0.248882	0.460585	-0.965336	0.31106
-4.3096	-0.597716	0.177902	1.01507	0.542253	1.0888	-0.749247	0.0401022	0.596252	-0.0546174	0.502671	-0.00098543	0.121788	0.359663	0.23	0.260379	0.906408	0.0909987	0.806915	0.249145	0.460606	-0.965228	0.311457
-4.30912	-0.597274	0.177874	1.01535	0.541525	1.08978	-0.749407	0.0407688	0.596136	-0.0555944	0.502939	-0.00125974	0.122017	0.359704	0.230042	0.260377	0.906469	0.0911382	0.807057	0.249236	0.460269	-0.964584	0.311686
-4.30864	-0.59821	0.178192	1.01552	0.540404	1.09081	-0.749518	0.0408429	0.59618	-0.0557511	0.502952	-0.00155387	0.121597	0.359307	0.229838	0.25981	0.906182	0.091185	0.80733	0.249324	0.459518	-0.964212	0.311789
-4.30816	-0.59832	0.178442	1.01573	0.541067	1.09104	-0.748774	0.0414755	0.596005	-0.0564971	0.503229	-0.00100921	0.120873	0.358912	0.229856	0.259886	0.906285	0.0911306	0.807142	0.249355	0.459295	-0.964272	0.31223
-4.30768	-0.599181	0.178629	1.01615	0.539364	1.09165	-0.748761	0.0428011	0.595713	-0.0571612	0.503277	0.000261876	0.120533	0.358464	0.229903	0.260141	0.906504	0.0909811	0.80753	0.249357	0.459257	-0.96419	0.311972
-4.3072	-0.598676	0.178695	1.01582	0.537744	1.09223	-0.748182	0.0437281	0.595673	-0.0581484	0.503479	0.00208966	0.120637	0.358517	0.229742	0.260121	0.906791	0.0908371	0.807922	0.25004	0.458682	-0.963844	0.312047
-4.30672	-0.598587	0.179473	1.0164	0.53761	1.09313	-0.748935	0.0445657	0.595571	-0.0583902	0.504122	0.00368584	0.120753	0.358018	0.229197	0.260143	0.907238	0.0907517	0.808289	0.249931	0.458253	-0.963968	0.312506
-4.30624	-0.598167	0.179789	1.01656	0.537707	1.09383	-0.749104	0.045532	0.595503	-0.0589542	0.504569	0.00497209	0.120404	0.35798	0.228951	0.260302	0.907408	0.0906112	0.808733	0.250286	0.457684	-0.963805	0.312459
-4.30576	-0.598619	0.180136	1.01634	0.537632	1.09478	-0.75041	0.0459538	0.595413	-0.0586936	0.504905	0.00512046	0.119892	0.357715	0.229049	0.260309	0.907814	0.0904759	0.809034	0.25104	0.457259	-0.96381	0.312624
-4.30528	-0.598603	0.180505	1.01602	0.537211	1.09577	-0.750648	0.0464517	0.595391	-0.058539	0.505142	0.00582935	0.119308	0.357319	0.228766	0.260814	0.909068	0.0902949	0.809403	0.251148	0.457075	-0.963691	0.312434
-4.3048	-0.598069	0.18065	1.01587	0.537403	1.09689	-0.750871	0.0475615	0.595233	-0.0591286	0.50513	0.00666561	0.119696	0.357181	0.228757	0.261178	0.908801	0.0903897	0.809888	0.251491	0.456912	-0.96404	0.312356
-4.30432	-0.597849	0.180808	1.01595	0.537326	1.09773	-0.751188	0.0483427	0.595091	-0.0589509	0.50547	0.00732635	0.119786	0.357253	0.228408	0.261131	0.909427	0.0902907	0.810036	0.251728	0.456702	-0.964076	0.31259
-4.30384	-0.597693	0.180425	1.01497	0.53753	1.09847	-0.752198	0.0489367	0.594973	-0.0597463	0.506021	0.00838669	0.118975	0.357314	0.228255	0.26126	0.909391	0.0902926	0.810006	0.251572	0.456442	-0.963908	0.312571
-4.30336	-0.597507	0.180798	1.01397	0.537084	1.09947	-0.751455	0.0491647	0.594872	-0.0611835	0.506171	0.00902196	0.118896	0.357333	0.228392	0.260868	0.909572	0.0902867	0.810108	0.251729	0.455834	-0.964057	0.31241
-4.30288	-0.597177	0.1808	1.01357	0.537367	1.10043	-0.751594	0.0501497	0.594854	-0.0617773	0.506759	0.00896484	0.118738	0.357437	0.228391	0.260889	0.90978	0.0904779	0.810549	0.252578	0.455343	-0.964593	0.312389
-4.3024	-0.59744	0.179971	1.01372	0.536546	1.10113	-0.751288	0.0507031	0.594778	-0.0625245	0.50768	0.0097088	0.118159	0.357325	0.228136	0.26072	0.910869	0.0903803	0.811056	0.252819	0.454772	-0.964337	0.312457
-4.30192	-0.597157	0.180381	1.01319	0.536353	1.10206	-0.752322	0.0508275	0.594798	-0.0631919	0.508864	0.0102976	0.117944	0.357172	0.228246	0.260804	0.911828	0.0901876	0.811568	0.253236	0.454062	-0.964893	0.312706
-4.30144	-0.59679	0.180578	1.01272	0.536615	1.10332	-0.750777	0.0512424	0.594922	-0.0634478	0.509883	0.0107612	0.117987	0.357355	0.228523	0.260843	0.91221	0.0901915	0.812172	0.253241	0.453354	-0.964139	0.31294
-4.30096	-0.59706	0.180714	1.01174	0.536355	1.10396	-0.751084	0.0515644	0.594923	-0.063825	0.510422	0.0119185	0.117644	0.357208	0.228864	0.260854	0.912537	0.0900799	0.812263	0.253571	0.452993	-0.964383	0.313059
-4.30048	-0.59534	0.181278	1.01183	0.53687	1.10532	-0.751564	0.0525902	0.59492	-0.0644502	0.510968	0.012235	0.117443	0.357408	0.228426	0.260683	0.913058	0.0900728	0.812697	0.253408	0.452686	-0.964591	0.313195
-4.3	-0.595535	0.18152	1.0117	0.537523	1.10642	-0.751739	0.0523227	0.594981	-0.064198	0.511864	0.0126364	0.117072	0.356986	0.228131	0.261245	0.914049	0.0900995	0.81287	0.253445	0.45213	-0.9645	0.31356
-4.29952	-0.595436	0.181027	1.01167	0.537421	1.10741	-0.75281	0.0529123	0.594834	-0.064775	0.512082	0.0135987	0.117012	0.35711	0.227805	0.26139	0.914145	0.0903404	0.813565	0.253693	0.451932	-0.964222	0.313253
-4.29904	-0.594803	0.180862	1.01139	0.536407	1.1084	-0.752581	0.0538782	0.594749	-0.0644409	0.511809	0.0134546	0.116918	0.357192	0.227569	0.261394	0.914292	0.0903382	0.814005	0.253809	0.451612	-0.964045	0.313197
-4.29856	-0.593037	0.18127	1.01078	0.535114	1.1097	-0.753934	0.0543479	0.594847	-0.0648005	0.512229	0.0142322	0.116283	0.356695	0.227375	0.261641	0.914639	0.090457	0.814252	0.253892	0.451391	-0.963702	0.313602
-4.29808	-0.59219	0.181065	1.01099	0.534475	1.11098	-0.755459	0.0549678	0.594654	-0.0649211	0.512821	0.0148387	0.1164	0.35667	0.227105	0.262037	0.915017	0.0903046	0.814012	0.253848	0.451036	-0.964059	0.313976
-4.2976	-0.59173	0.18127	1.01061	0.534128	1.11199	-0.755081	0.0555594	0.594536	-0.0651836	0.512865	0.0157149	0.115773	0.356666	0.226783	0.262548	0.915549	0.0901011	0.814442	0.253707	0.45076	-0.96408	0.313718
-4.29712	-0.591059	0.181463	1.01076	0.533901	1.11299	-0.755409	0.056431	0.594501	-0.0657675	0.512984	0.0169131	0.115829	0.356326	0.226421	0.262922	0.915732	0.0899979	0.814928	0.253507	0.450573	-0.963365	0.314114
-4.29664	-0.590602	0.181355	1.01059	0.534075	1.114	-0.756062	0.0567589	0.594269	-0.0651357	0.513242	0.018691	0.115975	0.356185	0.225883	0.263644	0.91646	0.0900989	0.815323	0.253325	0.450788	-0.963621	0.314483
-4.29616	-0.589665	0.181797	1.01036	0.533226	1.11486	-0.756424	0.0575669	0.594243	-0.0656251	0.512992	0.0202245	0.115578	0.356136	0.22564	0.26375	0.916658	0.0900512	0.815841	0.253289	0.450586	-0.96483	0.314338
-4.29568	-0.588235	0.181991	1.00959	0.533527	1.11556	-0.757007	0.0584849	0.594076	-0.0659917	0.513395	0.0212126	0.115659	0.356182	0.225432	0.264022	0.916917	0.0900302	0.81644	0.253166	0.450079	-0.964813	0.314183
-4.2952	-0.586828	0.1822	1.00984	0.53353	1.11644	-0.757232	0.0589642	0.594135	-0.0659705	0.513905	0.0220586	0.115086	0.356077	0.224771	0.264061	0.91733	0.0903875	0.817088	0.253032	0.449737	-0.963975	0.314204
-4.29472	-0.586169	0.18194	1.00969	0.533175	1.11718	-0.758366	0.0595615	0.593977	-0.0658223	0.514738	0.0234921	0.114484	0.355751	0.224385	0.264356	0.917895	0.0905793	0.817406	0.252882	0.449366	-0.963866	0.314393
-4.29424	-0.585451	0.181974	1.00968	0.533243	1.11812	-0.758078	0.060231	0.594087	-0.0660641	0.514939	0.0241598	0.114148	0.355696	0.224384	0.264249	0.918135	0.0906128	0.817854	0.252957	0.449178	-0.963305	0.314508
-4.29376	-0.584512	0.181838	1.00866	0.533926	1.11872	-0.758412	0.0611252	0.594198	-0.0661412	0.514597	0.0248806	0.114774	0.355608	0.224081	0.265004	0.918317	0.0905076	0.818594	0.25248	0.448592	-0.963766	0.314612
-4.29328	-0.583492	0.182098	1.00814	0.535237	1.12012	-0.75861	0.0623789	0.594257	-0.0661194	0.514975	0.0256069	0.114784	0.355264	0.2237	0.265036	0.918693	0.0906768	0.81909	0.252175	0.448545	-0.964188	0.314515
-4.2928	-0.582515	0.182581	1.00781	0.534546	1.12163	-0.760226	0.062711	0.594213	-0.066648	0.51496	0.0267833	0.114681	0.354781	0.223461	0.265615	0.91873	0.090936	0.81944	0.252199	0.448344	-0.964348	0.314839
-4.29232	-0.581666	0.183048	1.008	0.534195	1.12259	-0.760248	0.0631919	0.594157	-0.0660584	0.515327	0.0276764	0.114992	0.354313	0.22361	0.265615	0.919476	0.0909786	0.819923	0.251885	0.4481	-0.964237	0.314745
-4.29184	-0.581309	0.182913	1.00765	0.532647	1.12315	-0.761609	0.0636467	0.594142	-0.0659625	0.515536	0.028543	0.114517	0.353915	0.223225	0.265688	0.919612	0.0911745	0.820185	0.252034	0.44749	-0.963868	0.314941
-4.29136	-0.581393	0.183118	1.00665	0.532539	1.1236	-0.762752	0.0642076	0.594074	-0.0660182	0.515679	0.0299686	0.11419	0.353856	0.223505	0.26641	0.920129	0.0908153	0.820368	0.252242	0.447162	-0.963803	0.315236
-4.29088	-0.580743	0.183832	1.00619	0.532758	1.12413	-0.763852	0.0645387	0.59408	-0.0662104	0.515978	0.0300121	0.114223	0.35379	0.224083	0.2672	0.921005	0.0909046	0.820461	0.252108	0.44703	-0.964356	0.315524
-4.2904	-0.581211	0.183936	1.00604	0.532162	1.12466	-0.76442	0.0653728	0.594042	-0.066372	0.516281	0.0308067	0.114156	0.353287	0.224153	0.267344	0.921874	0.0912139	0.820936	0.252109	0.446644	-0.963685	0.315992
-4.28992	-0.580429	0.183715	1.00572	0.53179	1.12514	-0.765714	0.0662948	0.59417	-0.0662805	0.516365	0.031846	0.113896	0.353085	0.223901	0.26704	0.922405	0.091441	0.821628	0.252352	0.446466	-0.964392	0.316234
-4.28944	-0.580496	0.183927	1.00528	0.531506	1.1267	-0.764999	0.0667069	0.594101	-0.0667887	0.516223	0.0329068	0.114121	0.352988	0.223861	0.267643	0.922235	0.091497	0.821594	0.252275	0.445733	-0.965043	0.31678
-4.28896	-0.579436	0.184631	1.00502	0.532128	1.12834	-0.766279	0.06728	0.593944	-0.0665361	0.516346	0.0338215	0.114257	0.353025	0.223922	0.267891	0.922884	0.0915536	0.821646	0.252397	0.445385	-0.964777	0.317424
-4.28848	-0.578998	0.185196	1.00466	0.53226	1.12903	-0.766505	0.0676651	0.594064	-0.0664223	0.516529	0.0335896	0.11418	0.352588	0.223602	0.268141	0.922995	0.0916433	0.822168	0.252464	0.445025	-0.965244	0.317873
-4.288	-0.578694	0.185465	1.00408	0.533346	1.12957	-0.766827	0.0678971	0.593772	-0.066895	0.516766	0.0325926	0.114309	0.352423	0.223854	0.2684	0.923471	0.0917178	0.822283	0.252293	0.44465	-0.965361	0.318297
-4.28752	-0.577761	0.185533	1.00434	0.534507	1.1302	-0.767757	0.0687497	0.593512	-0.0665576	0.517774	0.0338013	0.114611	0.352279	0.223665	0.267919	0.923447	0.0919545	0.822402	0.252012	0.443959	-0.965248	0.318524
-4.28704	-0.578005	0.186043	1.00439	0.533706	1.13026	-0.76698	0.0695859	0.593509	-0.0655307	0.517921	0.0340702	0.114607	0.352128	0.223454	0.267728	0.923648	0.0921584	0.823068	0.252011	0.443109	-0.965356	0.319431
-4.28656	-0.578292	0.186312	1.00424	0.534642	1.13096	-0.768303	0.0700058	0.593306	-0.0660916	0.518319	0.0342142	0.115004	0.351829	0.223991	0.268102	0.92405	0.0925659	0.823264	0.251856	0.442923	-0.965627	0.319474
-4.28608	-0.578841	0.187176	1.00434	0.534864	1.13176	-0.768474	0.0702253	0.593622	-0.0665517	0.518546	0.0347028	0.115193	0.351517	0.223771	0.268605	0.924559	0.0926793	0.823814	0.252254	0.442465	-0.965967	0.319484
-4.2856	-0.578423	0.187801	1.00424	0.534839	1.13237	-0.768004	0.0705212	0.59371	-0.0662407	0.518629	0.0352966	0.114759	0.351088	0.223566	0.268499	0.924697	0.092893	0.82413	0.25234	0.441682	-0.966393	0.31957
-4.28512	-0.578595	0.187961	1.00384	0.534632	1.13307	-0.768189	0.0708548	0.594151	-0.0659671	0.519557	0.0354243	0.114966	0.351036	0.223625	0.268822	0.925374	0.0933036	0.824271	0.25249	0.441114	-0.966405	0.319841
-4.28464	-0.578097	0.188073	1.00393	0.53375	1.13397	-0.768346	0.0707458	0.594072	-0.0665919	0.52015	0.0361614	0.114803	0.350735	0.223	0.269102	0.926607	0.0936515	0.824489	0.252428	0.440672	-0.966525	0.32008
-4.28416	-0.578423	0.188514	1.00334	0.534345	1.13413	-0.768972	0.0711296	0.59429	-0.0672592	0.519995	0.0361459	0.114403	0.350521	0.22263	0.269332	0.927061	0.0937499	0.824781	0.252071	0.440229	-0.96646	0.320168
-4.28368	-0.578512	0.188736	1.00308	0.535451	1.13478	-0.76967	0.0722108	0.594332	-0.0671108	0.519815	0.0362873	0.114478	0.350434	0.222337	0.269389	0.92783	0.0939737	0.825126	0.252237	0.439718	-0.966602	0.320857
-4.2832	-0.577939	0.188743	1.00333	0.535745	1.13592	-0.770742	0.0725737	0.594438	-0.0675016	0.519675	0.0376864	0.114615	0.350073	0.222313	0.269273	0.928376	0.0940814	0.825293	0.252371	0.438836	-0.966568	0.321328
-4.28272	-0.577408	0.189478	1.00332	0.535015	1.13651	-0.772104	0.0730694	0.594513	-0.0679259	0.520494	0.0378262	0.115178	0.350055	0.222738	0.269604	0.928762	0.0941004	0.825622	0.252126	0.438344	-0.966748	0.321452
-4.28224	-0.577323	0.189862	1.00387	0.535609	1.13743	-0.772633	0.0734337	0.594526	-0.0691998	0.52115	0.039651	0.1155	0.350305	0.222715	0.270073	0.929401	0.094365	0.826108	0.251924	0.437787	-0.96669	0.321452
-4.28176	-0.577065	0.190229	1.00371	0.535922	1.13861	-0.772357	0.0738209	0.594589	-0.0695865	0.521365	0.0399579	0.115788	0.350003	0.222799	0.270314	0.929876	0.0945603	0.826603	0.251665	0.437659	-0.966842	0.321572
-4.28128	-0.576516	0.191337	1.00379	0.535832	1.13906	-0.773064	0.0736172	0.594468	-0.0698126	0.521727	0.0415149	0.115749	0.349822	0.222913	0.271343	0.930834	0.0946656	0.827405	0.251536	0.437155	-0.966202	0.3215
-4.2808	-0.57699	0.191996	1.00381	0.535428	1.13994	-0.77259	0.0743503	0.594373	-0.0707207	0.521873	0.0416708	0.115968	0.34997	0.22284	0.271806	0.931756	0.0948196	0.82752	0.251139	0.436766	-0.966607	0.321878
-4.28032	-0.576248	0.192825	1.00394	0.536859	1.14061	-0.773545	0.0745867	0.594448	-0.0715824	0.522056	0.0414309	0.115726	0.349749	0.222781	0.272624	0.932487	0.0949768	0.82776	0.251071	0.43637	-0.967269	0.322188
-4.27984	-0.575392	0.192825	1.00283	0.536901	1.14126	-0.773627	0.0745711	0.594575	-0.0720129	0.522428	0.0412097	0.116019	0.349595	0.22257	0.273189	0.932872	0.0951024	0.828349	0.250649	0.435846	-0.967223	0.321936
-4.27936	-0.574753	0.193093	1.00248	0.536955	1.14215	-0.773976	0.0749005	0.594698	-0.0727868	0.52252	0.0418908	0.116258	0.349464	0.222502	0.274175	0.933355	0.0954959	0.828388	0.250611	0.435452	-0.967375	0.322464
-4.27888	-0.573816	0.192842	1.00228	0.53694	1.14249	-0.773998	0.0753424	0.594719	-0.0727726	0.522236	0.0431835	0.116307	0.349767	0.222796	0.274185	0.933864	0.0959435	0.828699	0.250552	0.434916	-0.967368	0.323135
-4.2784	-0.573081	0.192256	1.00253	0.536838	1.14287	-0.773809	0.0752782	0.59473	-0.0728661	0.52242	0.0433551	0.116164	0.349939	0.222971	0.275056	0.934343	0.0963032	0.828934	0.250542	0.434713	-0.966439	0.32293
-4.27792	-0.572602	0.19177	1.00142	0.537064	1.14364	-0.774509	0.0758846	0.594961	-0.0729544	0.522338	0.0436057	0.116339	0.349805	0.222892	0.275271	0.934986	0.0964288	0.829265	0.250236	0.434356	-0.96613	0.323017
-4.27744	-0.57256	0.192437	1.00074	0.537367	1.14407	-0.774121	0.0766799	0.594984	-0.0735408	0.522476	0.044882	0.115805	0.349768	0.222874	0.275277	0.936197	0.0967895	0.829789	0.24988	0.434294	-0.965734	0.323564
-4.27696	-0.571786	0.192283	1.00103	0.537476	1.14488	-0.773135	0.0775279	0.595001	-0.0739345	0.523037	0.0448993	0.115012	0.349754	0.222961	0.275561	0.937633	0.0968381	0.830653	0.249765	0.433712	-0.966527	0.323441
-4.27648	-0.570986	0.19204	1.00104	0.537708	1.14602	-0.772843	0.0778405	0.594846	-0.0739398	0.523177	0.0446441	0.115033	0.350095	0.223187	0.275621	0.938313	0.0970491	0.830904	0.249796	0.432983	-0.96652	0.323506
-4.276	-0.571815	0.192242	1.00014	0.537686	1.14683	-0.772562	0.0780227	0.594788	-0.0749099	0.523884	0.0444653	0.114843	0.35009	0.223261	0.276122	0.939063	0.0973505	0.831487	0.250153	0.432508	-0.966372	0.323492
-4.27552	-0.572298	0.19255	0.999993	0.538308	1.14745	-0.771075	0.0785888	0.594796	-0.0747262	0.524104	0.0444166	0.114138	0.350086	0.223761	0.276493	0.939869	0.0974712	0.832292	0.249996	0.432209	-0.965811	0.323692
-4.27504	-0.571843	0.193132	0.999522	0.537791	1.14815	-0.770736	0.0792326	0.594855	-0.0750829	0.524664	0.0439754	0.114502	0.35017	0.223921	0.276577	0.941068	0.0977137	0.832435	0.249777	0.431944	-0.965245	0.323903
-4.27456	-0.572041	0.193323	0.998534	0.538986	1.14878	-0.769344	0.0800024	0.594652	-0.0757472	0.525141	0.0443935	0.115021	0.350074	0.223645	0.277642	0.942605	0.0979193	0.832818	0.249899	0.431615	-0.964722	0.324082
-4.27408	-0.572316	0.193585	0.998278	0.539658	1.14961	-0.767952	0.0803899	0.594585	-0.0757973	0.525088	0.0449355	0.11461	0.349864	0.223447	0.278004	0.943487	0.0982732	0.833279	0.249631	0.431394	-0.96447	0.324747
-4.2736	-0.572418	0.193558	0.997741	0.540073	1.15021	-0.767449	0.0807746	0.594227	-0.0749515	0.525276	0.0446303	0.113962	0.349849	0.223291	0.278686	0.943734	0.0985696	0.8338	0.249367	0.430879	-0.964354	0.325398
-4.27312	-0.572347	0.193631	0.99683	0.540578	1.15098	-0.766627	0.0809244	0.594214	-0.0755998	0.525178	0.0448656	0.114325	0.350037	0.223611	0.279063	0.94491	0.0991661	0.834645	0.249264	0.430706	-0.963984	0.325532
-4.27264	-0.571971	0.194045	0.996226	0.541456	1.15184	-0.765735	0.0811533	0.594219	-0.0763786	0.52511	0.0455555	0.114241	0.35018	0.223797	0.279287	0.945626	0.0994358	0.835192	0.249576	0.430621	-0.963697	0.325954
-4.27216	-0.571841	0.194217	0.996221	0.541703	1.15235	-0.764938	0.0809756	0.594147	-0.0764516	0.524976	0.0461375	0.114123	0.350295	0.223842	0.279232	0.946592	0.0995465	0.835395	0.249399	0.430706	-0.963664	0.326343
-4.27168	-0.571815	0.194577	0.995724	0.5425	1.1532	-0.765026	0.0814319	0.594063	-0.0761916	0.525183	0.0465748	0.114217	0.350291	0.223724	0.279823	0.947278	0.0999789	0.83582	0.249642	0.430098	-0.964051	0.326556
-4.2712	-0.571137	0.194988	0.995969	0.542798	1.15414	-0.765072	0.0813947	0.59423	-0.0763494	0.52612	0.0474792	0.114066	0.350428	0.223714	0.279542	0.947643	0.100273	0.836312	0.249489	0.429951	-0.963412	0.327064
-4.27072	-0.571473	0.195161	0.995506	0.543335	1.15443	-0.765059	0.081888	0.594233	-0.0770238	0.526499	0.0480527	0.11381	0.35017	0.223791	0.279996	0.948782	0.100509	0.836606	0.249186	0.429523	-0.963041	0.327471
-4.27024	-0.571462	0.194995	0.995213	0.544577	1.15555	-0.764961	0.0826299	0.594328	-0.0766127	0.526523	0.0479622	0.114033	0.350159	0.223735	0.280426	0.949507	0.100634	0.83675	0.249064	0.429088	-0.963069	0.328037
-4.26976	-0.571603	0.194367	0.994152	0.545149	1.1562	-0.7655	0.0824255	0.594394	-0.0760439	0.526747	0.0480007	0.114167	0.35014	0.224186	0.28009	0.950339	0.10098	0.837116	0.249214	0.428689	-0.963499	0.328341
-4.26928	-0.571715	0.194472	0.99367	0.544994	1.15734	-0.765412	0.0825872	0.594381	-0.0759264	0.526839	0.0470752	0.114012	0.350143	0.224034	0.279654	0.95047	0.101248	0.838103	0.249339	0.42844	-0.96369	0.328667
-4.2688	-0.57164	0.193837	0.993017	0.545885	1.15794	-0.765876	0.0827979	0.594403	-0.0756283	0.527738	0.0465677	0.114011	0.350379	0.22395	0.279878	0.951335	0.101789	0.838569	0.249361	0.428107	-0.963755	0.328487
-4.26832	-0.572178	0.194048	0.992567	0.544768	1.15816	-0.766044	0.0832667	0.594359	-0.0752463	0.527866	0.046597	0.114234	0.350224	0.223746	0.279699	0.951591	0.101932	0.838888	0.249101	0.427608	-0.963819	0.328977
-4.26784	-0.57311	0.192993	0.991553	0.54522	1.15907	-0.766776	0.0842185	0.594136	-0.0750029	0.528044	0.0471252	0.114569	0.350183	0.223793	0.280081	0.952219	0.102271	0.839558	0.248921	0.427605	-0.963685	0.329482
-4.26736	-0.57379	0.192919	0.991106	0.546283	1.15951	-0.766938	0.0845913	0.593938	-0.0740374	0.528898	0.0465763	0.114637	0.350363	0.224265	0.281157	0.952629	0.102633	0.839765	0.2491	0.427355	-0.963711	0.329715
-4.26688	-0.574512	0.192741	0.991182	0.546656	1.16026	-0.767854	0.0850098	0.593912	-0.0740534	0.528947	0.0468669	0.114568	0.350724	0.224249	0.28254	0.953455	0.103001	0.840003	0.249372	0.427056	-0.963288	0.330026
-4.2664	-0.575194	0.193343	0.991141	0.546653	1.16075	-0.768254	0.0862119	0.59372	-0.0737606	0.529021	0.0465144	0.114491	0.350637	0.224224	0.282898	0.954246	0.103474	0.840646	0.2495	0.426931	-0.964266	0.329816
-4.26592	-0.576415	0.19348	0.990952	0.546187	1.1613	-0.76841	0.0868985	0.593652	-0.0733694	0.529531	0.0471837	0.114379	0.350394	0.224924	0.282713	0.95442	0.103598	0.841013	0.249664	0.426426	-0.964159	0.32986
-4.26544	-0.577392	0.193439	0.990646	0.545674	1.16149	-0.76884	0.0875521	0.593443	-0.0735451	0.529867	0.0473599	0.113835	0.350239	0.225162	0.283233	0.954954	0.103778	0.841648	0.249511	0.426158	-0.96369	0.329906
-4.26496	-0.577869	0.193727	0.990163	0.545296	1.16193	-0.769269	0.0884562	0.593446	-0.072779	0.530029	0.0479521	0.114065	0.350138	0.225887	0.283385	0.955346	0.103973	0.842282	0.249435	0.425825	-0.963741	0.330063
-4.26448	-0.578413	0.193753	0.989956	0.545921	1.16271	-0.76987	0.0886263	0.593482	-0.0722544	0.530094	0.0470966	0.114083	0.349764	0.226479	0.283822	0.955755	0.104289	0.842753	0.249645	0.424842	-0.964054	0.33026
-4.264	-0.578797	0.193578	0.990071	0.546185	1.16342	-0.770075	0.0895007	0.593571	-0.0714077	0.53085	0.0474321	0.11403	0.349613	0.226923	0.283863	0.955827	0.104686	0.843328	0.249722	0.424171	-0.963545	0.331049
-4.26352	-0.580291	0.193695	0.990366	0.546046	1.16436	-0.770028	0.0910701	0.593589	-0.0716448	0.531125	0.0459798	0.114418	0.349451	0.227036	0.284326	0.956614	0.104779	0.843963	0.24971	0.423521	-0.963518	0.331399
-4.26304	-0.58095	0.193193	0.991111	0.546483	1.16499	-0.769213	0.0911822	0.593512	-0.0715116	0.530994	0.0463107	0.114347	0.348997	0.227364	0.284312	0.956908	0.104935	0.844509	0.249678	0.423781	-0.962996	0.331956
-4.26256	-0.581262	0.193126	0.991008	0.545803	1.16563	-0.769943	0.0922184	0.593295	-0.0718402	0.531388	0.04585	0.114353	0.349099	0.227522	0.284672	0.957214	0.104953	0.844683	0.249511	0.423593	-0.962791	0.33243
-4.26208	-0.582615	0.192965	0.991134	0.544782	1.16568	-0.770949	0.0935089	0.593305	-0.0707839	0.531286	0.0468524	0.114506	0.349059	0.227664	0.284808	0.956842	0.105033	0.844948	0.249221	0.423119	-0.96222	0.332937
-4.2616	-0.582963	0.193018	0.990941	0.544984	1.16607	-0.771279	0.0943798	0.593307	-0.070539	0.531954	0.0457371	0.114282	0.348631	0.227235	0.284932	0.957494	0.105241	0.845438	0.249145	0.423015	-0.962337	0.333318
-4.26112	-0.583846	0.192814	0.990544	0.545562	1.16687	-0.770988	0.0953323	0.593244	-0.0698875	0.532699	0.0462859	0.114112	0.348894	0.227348	0.28451	0.957272	0.105249	0.845762	0.24943	0.423024	-0.962216	0.333505
-4.26064	-0.5844	0.192949	0.990405	0.545154	1.16731	-0.77112	0.0964953	0.593386	-0.0696484	0.533301	0.0463834	0.113584	0.34912	0.227413	0.284697	0.958152	0.105143	0.846315	0.249161	0.422528	-0.962233	0.334225
-4.26016	-0.584817	0.193258	0.990398	0.544711	1.168	-0.773101	0.0970483	0.593573	-0.068697	0.533584	0.0461862	0.113281	0.349219	0.227511	0.28435	0.958341	0.105079	0.846567	0.248966	0.422437	-0.961809	0.335245
-4.25968	-0.584257	0.193092	0.990308	0.544271	1.16889	-0.772765	0.0976793	0.593492	-0.0690115	0.534541	0.0468593	0.113285	0.349047	0.227686	0.28449	0.958851	0.105018	0.846785	0.24862	0.421946	-0.961237	0.335527
-4.2592	-0.584461	0.19325	0.98994	0.544407	1.16942	-0.772582	0.0984748	0.593612	-0.0689868	0.535151	0.0462025	0.113564	0.348672	0.227993	0.284145	0.959672	0.105351	0.847189	0.248538	0.421532	-0.96155	0.335925
-4.25872	-0.584606	0.193246	0.989837	0.543492	1.16993	-0.773506	0.0997795	0.593787	-0.0680861	0.535703	0.0467918	0.11294	0.348121	0.227914	0.284477	0.961394	0.105734	0.847519	0.248331	0.421166	-0.961228	0.336683
-4.25824	-0.586359	0.193296	0.989146	0.543234	1.17091	-0.774915	0.10053	0.593956	-0.0675394	0.53619	0.0466039	0.112834	0.348012	0.228336	0.284615	0.961733	0.10569	0.847638	0.247976	0.420572	-0.960555	0.337678
-4.25776	-0.586642	0.192842	0.988635	0.542794	1.17163	-0.774736	0.10144	0.594012	-0.0669707	0.537158	0.0458192	0.112486	0.34782	0.228222	0.285023	0.962977	0.105873	0.847944	0.248113	0.420396	-0.95985	0.337793
-4.25728	-0.586089	0.193016	0.988581	0.543132	1.17239	-0.777003	0.101846	0.594143	-0.0663272	0.538095	0.0448595	0.112612	0.347275	0.228208	0.285372	0.963011	0.106117	0.848319	0.248012	0.41999	-0.959426	0.338387
-4.2568	-0.585931	0.193075	0.987926	0.54313	1.17313	-0.777077	0.102977	0.594361	-0.0666432	0.53819	0.0448175	0.112772	0.346875	0.227885	0.284675	0.963719	0.106305	0.848462	0.247981	0.419226	-0.959214	0.339056
-4.25632	-0.586611	0.192517	0.987204	0.542201	1.17392	-0.777262	0.104138	0.594363	-0.0664923	0.538957	0.0427477	0.112292	0.346308	0.227601	0.284996	0.963841	0.106782	0.848768	0.2479	0.418927	-0.95873	0.339804
-4.25584	-0.587006	0.192493	0.986632	0.540894	1.17501	-0.778013	0.105099	0.594554	-0.0658946	0.539134	0.0434431	0.112333	0.346082	0.22791	0.285304	0.964284	0.106877	0.848651	0.247652	0.418648	-0.959057	0.340371
-4.25536	-0.587096	0.193182	0.985639	0.540257	1.1755	-0.779066	0.106003	0.594671	-0.0656208	0.539867	0.0441634	0.112245	0.345831	0.227875	0.285605	0.964641	0.107092	0.849054	0.247703	0.418319	-0.958459	0.340914
-4.25488	-0.587547	0.192937	0.984633	0.540366	1.17645	-0.778864	0.106975	0.594602	-0.0651512	0.539975	0.0443773	0.111834	0.345234	0.227578	0.286263	0.965316	0.107183	0.849416	0.247351	0.417967	-0.957923	0.34156
-4.2544	-0.587761	0.192967	0.983713	0.541268	1.1779	-0.77973	0.108184	0.594727	-0.06484	0.540486	0.0451987	0.111601	0.344742	0.227673	0.286249	0.966476	0.107283	0.849374	0.246996	0.418293	-0.957412	0.342261
-4.25392	-0.587862	0.193997	0.983943	0.54142	1.17868	-0.780894	0.109159	0.594741	-0.0645275	0.540658	0.0446547	0.111265	0.344317	0.227582	0.286818	0.967695	0.107348	0.849583	0.2468	0.417677	-0.956957	0.342536
-4.25344	-0.587366	0.195444	0.983555	0.540964	1.17937	-0.781183	0.109644	0.594592	-0.0645106	0.541106	0.044467	0.111239	0.34375	0.227743	0.287673	0.968495	0.107619	0.850161	0.247145	0.41745	-0.95643	0.342644
-4.25296	-0.586585	0.195452	0.98274	0.540523	1.18005	-0.781652	0.110617	0.594554	-0.0639674	0.541477	0.0452379	0.110714	0.343409	0.227451	0.287558	0.969089	0.107727	0.850462	0.247201	0.417131	-0.956264	0.342954
-4.25248	-0.586248	0.196228	0.981606	0.5403	1.18048	-0.782541	0.111208	0.594559	-0.0625929	0.542076	0.0456612	0.110601	0.343367	0.227238	0.287833	0.969127	0.108049	0.850851	0.246882	0.4172	-0.95563	0.343425
-4.252	-0.586408	0.196115	0.98097	0.539295	1.18136	-0.782863	0.112153	0.59435	-0.0618427	0.541586	0.0456801	0.110621	0.343275	0.226991	0.288684	0.969439	0.108101	0.851193	0.246613	0.417143	-0.95529	0.343881
-4.25152	-0.586185	0.196243	0.980406	0.53843	1.18257	-0.783369	0.112106	0.594267	-0.0614624	0.541184	0.046254	0.110613	0.342953	0.226816	0.289419	0.970502	0.108248	0.851712	0.246559	0.416781	-0.954737	0.343895
-4.25104	-0.585363	0.196653	0.979987	0.53842	1.18319	-0.782758	0.113097	0.594422	-0.0612279	0.541769	0.0464843	0.11025	0.3428	0.227108	0.289873	0.971034	0.108441	0.852059	0.246915	0.416749	-0.953458	0.344513
-4.25056	-0.585465	0.19713	0.979961	0.538667	1.18336	-0.782476	0.114048	0.594676	-0.061371	0.542011	0.0475823	0.110668	0.342446	0.227715	0.290763	0.972007	0.108446	0.852243	0.246647	0.416583	-0.953381	0.344536
-4.25008	-0.585509	0.197433	0.979531	0.538114	1.18412	-0.78297	0.114378	0.59499	-0.0619849	0.542313	0.0474267	0.110987	0.342023	0.227616	0.291297	0.972502	0.108579	0.852369	0.246691	0.416467	-0.953018	0.34463
-4.2496	-0.584885	0.198156	0.979536	0.537603	1.18508	-0.782366	0.114633	0.595347	-0.0613168	0.542804	0.0479409	0.110929	0.341695	0.22755	0.291493	0.973251	0.108554	0.852836	0.246872	0.416403	-0.952954	0.344968
-4.24912	-0.583761	0.199391	0.97969	0.537936	1.18541	-0.78283	0.115364	0.595767	-0.0612901	0.54257	0.0476647	0.110743	0.341194	0.227618	0.292069	0.973931	0.108777	0.853248	0.246755	0.416381	-0.95242	0.344975
-4.24864	-0.583714	0.200192	0.979014	0.537399	1.18667	-0.782871	0.116549	0.596067	-0.0609944	0.54303	0.0472607	0.110815	0.340681	0.227904	0.292518	0.974674	0.108792	0.853701	0.246562	0.416425	-0.951812	0.345453
-4.24816	-0.584345	0.200943	0.979213	0.537864	1.18758	-0.782885	0.117691	0.596233	-0.0612009	0.543114	0.0459229	0.110768	0.340359	0.228354	0.292531	0.975004	0.108771	0.854053	0.246091	0.416445	-0.951093	0.34556
-4.24768	-0.584819	0.20074	0.979131	0.538071	1.18834	-0.782876	0.118474	0.596254	-0.0622625	0.543107	0.0455255	0.110196	0.340097	0.22892	0.292649	0.975195	0.108657	0.854637	0.246112	0.416661	-0.950979	0.34556
-4.2472	-0.585326	0.201654	0.979505	0.538352	1.18865	-0.781948	0.119172	0.596518	-0.0616587	0.543263	0.043111	0.110103	0.339892	0.229052	0.29272	0.975849	0.108702	0.855089	0.2461	0.416678	-0.950808	0.345321
-4.24672	-0.586343	0.202358	0.980018	0.539385	1.18899	-0.781783	0.119894	0.596427	-0.0621841	0.543404	0.0433645	0.109699	0.33993	0.229205	0.293499	0.976043	0.108944	0.855617	0.245585	0.416431	-0.949921	0.345898
-4.24624	-0.587163	0.202599	0.979666	0.540193	1.18967	-0.780923	0.120998	0.596602	-0.0619702	0.543469	0.042114	0.110035	0.34018	0.229295	0.293619	0.976814	0.109145	0.855977	0.245254	0.415994	-0.949055	0.345919
-4.24576	-0.58749	0.203071	0.979822	0.541589	1.19051	-0.780726	0.122508	0.596635	-0.0613268	0.543375	0.0415474	0.109597	0.340277	0.229823	0.294299	0.977064	0.109209	0.856283	0.245331	0.415747	-0.948608	0.346227
-4.24528	-0.587524	0.203848	0.979314	0.541284	1.19137	-0.779786	0.123455	0.597029	-0.062415	0.542983	0.0412838	0.109531	0.340067	0.230112	0.294476	0.977758	0.109129	0.856457	0.245152	0.415324	-0.947734	0.346392
-4.2448	-0.587946	0.204717	0.978857	0.542254	1.19156	-0.779321	0.124154	0.596927	-0.0639236	0.543097	0.0405019	0.109724	0.339994	0.230726	0.295791	0.978583	0.109339	0.856981	0.245432	0.415415	-0.947443	0.346426
-4.24432	-0.588187	0.205147	0.979145	0.543035	1.19221	-0.780714	0.125251	0.59687	-0.06445	0.543893	0.0404959	0.110022	0.339941	0.23116	0.296004	0.979084	0.109633	0.857427	0.245404	0.41525	-0.946703	0.346311
-4.24384	-0.589209	0.205804	0.979095	0.542393	1.19256	-0.780018	0.12615	0.596998	-0.0653087	0.543996	0.0398779	0.109775	0.340042	0.231339	0.296301	0.978858	0.109878	0.857791	0.245195	0.415459	-0.946139	0.346492
-4.24336	-0.590609	0.206429	0.979234	0.542095	1.19319	-0.777998	0.126692	0.597359	-0.0662991	0.544308	0.0397045	0.109532	0.340327	0.231418	0.296269	0.979521	0.110219	0.858338	0.245065	0.415706	-0.944865	0.346377
-4.24288	-0.590474	0.207052	0.979131	0.541912	1.19407	-0.777617	0.127911	0.597777	-0.0670442	0.544306	0.037238	0.109504	0.340388	0.231852	0.297307	0.979599	0.110544	0.858922	0.245127	0.415317	-0.943825	0.346463
-4.2424	-0.590774	0.20801	0.978831	0.542169	1.1946	-0.778106	0.128061	0.597983	-0.068041	0.544526	0.0364957	0.109299	0.340595	0.232172	0.296303	0.980908	0.110566	0.859155	0.245229	0.41542	-0.943186	0.346889
-4.24192	-0.590727	0.2084	0.97804	0.542245	1.19637	-0.777464	0.128285	0.598112	-0.0692183	0.544949	0.0362239	0.109488	0.340636	0.232442	0.296147	0.981549	0.111077	0.8601	0.245099	0.415041	-0.942435	0.34705
-4.24144	-0.590829	0.208981	0.977759	0.542805	1.1976	-0.776428	0.129198	0.598183	-0.0704829	0.544829	0.0358989	0.109757	0.340613	0.232796	0.295657	0.983061	0.111284	0.86098	0.245473	0.414804	-0.941538	0.346937
-4.24096	-0.591569	0.209618	0.977603	0.542522	1.198	-0.776026	0.129687	0.598399	-0.0706444	0.545239	0.0354961	0.110022	0.340669	0.232804	0.295944	0.983975	0.111387	0.861634	0.245443	0.414545	-0.941427	0.346894
-4.24048	-0.591491	0.210288	0.977031	0.542657	1.19881	-0.776108	0.130169	0.59853	-0.0710475	0.54504	0.0347962	0.110322	0.34081	0.232726	0.296477	0.984491	0.111508	0.862243	0.244999	0.414169	-0.940768	0.346963
-4.24	-0.592452	0.211088	0.976664	0.542491	1.19965	-0.775692	0.130542	0.598606	-0.070965	0.545081	0.0351841	0.11031	0.340998	0.232685	0.297431	0.985576	0.111713	0.862638	0.244755	0.414196	-0.940402	0.347092
-4.23952	-0.592085	0.212377	0.976622	0.544214	1.19937	-0.776349	0.131616	0.598482	-0.0714615	0.545278	0.0356622	0.110092	0.341086	0.232753	0.298343	0.986678	0.111941	0.863208	0.244511	0.414322	-0.939957	0.347096
-4.23904	-0.591233	0.213263	0.976253	0.543679	1.19942	-0.775401	0.132444	0.598635	-0.0720124	0.545613	0.035713	0.110072	0.341308	0.232766	0.298749	0.987954	0.112278	0.863947	0.24434	0.414059	-0.939554	0.347266
-4.23856	-0.591644	0.214443	0.975791	0.544399	1.19972	-0.774911	0.133064	0.598734	-0.0720592	0.545374	0.0357913	0.109947	0.341702	0.23266	0.299668	0.988896	0.112301	0.864699	0.244075	0.413905	-0.938598	0.347631
-4.23808	-0.59166	0.215389	0.97585	0.544759	1.20014	-0.774494	0.133661	0.598671	-0.0728109	0.54567	0.0363371	0.109817	0.341789	0.232764	0.300336	0.990226	0.112124	0.865478	0.243668	0.414001	-0.938282	0.347826
-4.2376	-0.591718	0.216411	0.975446	0.544914	1.2008	-0.773901	0.13424	0.598728	-0.071973	0.54548	0.0358867	0.109694	0.342104	0.23326	0.301085	0.991199	0.112636	0.86616	0.243156	0.414305	-0.93789	0.348177
-4.23712	-0.591945	0.217019	0.97526	0.546256	1.20141	-0.773068	0.134757	0.598811	-0.0712009	0.545685	0.0352567	0.109635	0.342247	0.233467	0.301775	0.991971	0.112788	0.866781	0.243314	0.414291	-0.93746	0.348324
-4.23664	-0.592929	0.218071	0.975243	0.546642	1.20257	-0.77298	0.135207	0.598827	-0.0714186	0.546333	0.0362488	0.109324	0.342662	0.234168	0.302406	0.992782	0.113045	0.867018	0.242854	0.414018	-0.937298	0.348458
-4.23616	-0.593821	0.218831	0.974706	0.548065	1.20312	-0.773183	0.135278	0.598474	-0.0709203	0.546646	0.0365258	0.109059	0.342985	0.234215	0.302899	0.994116	0.113272	0.867622	0.242794	0.414074	-0.936659	0.348651
-4.23568	-0.594311	0.219657	0.974046	0.548401	1.20383	-0.772817	0.135844	0.598537	-0.0706507	0.546826	0.0365534	0.108407	0.343408	0.234457	0.303002	0.99548	0.113585	0.868413	0.242777	0.41385	-0.936287	0.348933
-4.2352	-0.594819	0.22064	0.973365	0.549279	1.20424	-0.771563	0.136972	0.598488	-0.0712996	0.546476	0.0361727	0.108435	0.343693	0.235438	0.303118	0.996365	0.113807	0.86907	0.242682	0.414329	-0.936098	0.349273
-4.23472	-0.595477	0.221102	0.972422	0.550631	1.20445	-0.771236	0.137776	0.598568	-0.0710168	0.54625	0.0361489	0.108272	0.343833	0.236385	0.303642	0.997122	0.113948	0.869518	0.243015	0.414302	-0.935502	0.349625
-4.23424	-0.595626	0.221771	0.972701	0.551139	1.20428	-0.770641	0.138749	0.598521	-0.0706705	0.546704	0.0369986	0.108282	0.34384	0.237182	0.30437	0.997539	0.113993	0.8697	0.243045	0.41416	-0.935329	0.349743
-4.23376	-0.596514	0.222194	0.972803	0.551698	1.20503	-0.769897	0.139868	0.598571	-0.069895	0.546654	0.0367178	0.107901	0.344368	0.237889	0.30518	0.998701	0.114138	0.870306	0.243013	0.414116	-0.935255	0.350409
-4.23328	-0.596623	0.222392	0.971984	0.551166	1.20538	-0.768103	0.140033	0.598587	-0.0708665	0.546839	0.0370921	0.107586	0.344431	0.238672	0.305831	0.999723	0.114359	0.870663	0.243158	0.413919	-0.934732	0.350893
-4.2328	-0.59719	0.222459	0.971644	0.550784	1.20578	-0.768013	0.140564	0.598619	-0.0707704	0.547341	0.0365424	0.107582	0.344722	0.239285	0.306543	1.00027	0.114349	0.871165	0.243044	0.413722	-0.934264	0.351212
-4.23232	-0.597153	0.223247	0.971131	0.550741	1.20697	-0.76749	0.141526	0.598725	-0.0705977	0.546925	0.0363736	0.107895	0.34498	0.239594	0.306798	1.00166	0.114449	0.871534	0.242886	0.413463	-0.934406	0.351708
-4.23184	-0.597724	0.224374	0.971058	0.549738	1.20771	-0.76709	0.141921	0.59863	-0.0709348	0.546638	0.0364257	0.107926	0.345095	0.240088	0.306839	1.00214	0.114459	0.872146	0.242863	0.413519	-0.933803	0.352
-4.23136	-0.598262	0.225529	0.971528	0.550165	1.20821	-0.766684	0.142275	0.598598	-0.0714332	0.546585	0.0362906	0.107457	0.345368	0.240785	0.307522	1.00344	0.114545	0.872393	0.24344	0.414028	-0.932974	0.352624
-4.23088	-0.598449	0.226493	0.971629	0.549665	1.20918	-0.766156	0.142781	0.598589	-0.0715189	0.546124	0.0366046	0.106676	0.34533	0.241195	0.307428	1.00391	0.114546	0.873119	0.243533	0.413664	-0.932534	0.352759
-4.2304	-0.59852	0.227318	0.971891	0.550964	1.20986	-0.766281	0.1431	0.598585	-0.0724337	0.54617	0.0374534	0.106374	0.345563	0.241648	0.308072	1.0055	0.114626	0.873358	0.243352	0.413651	-0.932415	0.35274
-4.22992	-0.599538	0.228435	0.971678	0.551152	1.21124	-0.765327	0.143298	0.598693	-0.0731636	0.54592	0.0376635	0.105629	0.345637	0.242007	0.307555	1.00596	0.114617	0.873472	0.242817	0.413554	-0.932169	0.352669
-4.22944	-0.60022	0.229109	0.971614	0.551199	1.21215	-0.764372	0.143739	0.598896	-0.0738729	0.545604	0.037505	0.105216	0.34553	0.242491	0.307706	1.00655	0.114665	0.873656	0.24249	0.413519	-0.931584	0.352932
-4.22896	-0.600593	0.229378	0.970623	0.550342	1.21334	-0.764698	0.144155	0.598833	-0.0740489	0.54529	0.0375495	0.10513	0.345589	0.24281	0.307964	1.00767	0.114517	0.873981	0.242661	0.413524	-0.931504	0.353323
-4.22848	-0.601273	0.229866	0.971538	0.548628	1.21367	-0.764457	0.144969	0.598954	-0.0748457	0.54537	0.038292	0.105169	0.345571	0.243399	0.308326	1.00842	0.114472	0.87434	0.242743	0.413507	-0.930436	0.353948
-4.228	-0.601515	0.230509	0.971131	0.547843	1.21406	-0.765376	0.14543	0.598716	-0.0751743	0.54483	0.0367202	0.104819	0.345702	0.243624	0.308821	1.00947	0.114764	0.874375	0.242739	0.413096	-0.929929	0.354067
-4.22752	-0.601614	0.230747	0.971184	0.546882	1.21455	-0.766919	0.145179	0.598616	-0.0749593	0.544998	0.0360934	0.10482	0.345734	0.243972	0.309294	1.01041	0.114665	0.874641	0.242743	0.413095	-0.929997	0.354783
-4.22704	-0.60194	0.230809	0.971068	0.547154	1.21514	-0.767191	0.145814	0.598732	-0.0755092	0.545089	0.0355909	0.104779	0.345862	0.244643	0.310169	1.01199	0.114681	0.874833	0.242387	0.412837	-0.929269	0.355026
-4.22656	-0.602608	0.232076	0.9713	0.547971	1.21576	-0.76803	0.145838	0.598723	-0.0764887	0.544617	0.0346402	0.103842	0.346252	0.244949	0.310396	1.01254	0.114747	0.87496	0.242037	0.412677	-0.929026	0.355625
-4.22608	-0.603202	0.232793	0.971791	0.54885	1.21644	-0.76876	0.146326	0.598728	-0.0764811	0.544582	0.0345914	0.103127	0.346121	0.24555	0.310619	1.01418	0.114688	0.875098	0.241772	0.41211	-0.927852	0.355731
-4.2256	-0.604205	0.233254	0.972401	0.549492	1.2169	-0.769431	0.146911	0.598829	-0.0764818	0.544922	0.0339954	0.102674	0.346428	0.246264	0.311483	1.01518	0.114874	0.875419	0.241462	0.412202	-0.927246	0.355874
-4.22512	-0.605034	0.233255	0.972152	0.549216	1.21761	-0.769162	0.146963	0.598832	-0.0771054	0.544657	0.0328026	0.102664	0.346048	0.246643	0.312209	1.01667	0.114832	0.875691	0.241184	0.411909	-0.926205	0.356958
-4.22464	-0.605377	0.233613	0.972679	0.54914	1.21834	-0.770243	0.147811	0.598834	-0.0768262	0.544722	0.0329746	0.102228	0.345781	0.246916	0.312505	1.01743	0.1149	0.876025	0.241328	0.411857	-0.924893	0.357719
-4.22416	-0.606555	0.233882	0.973292	0.549093	1.21893	-0.770158	0.147852	0.598731	-0.0764709	0.54465	0.0325206	0.101895	0.345967	0.246946	0.312393	1.01864	0.115214	0.876247	0.240889	0.411991	-0.924243	0.358122
-4.22368	-0.606767	0.234861	0.973685	0.548796	1.21879	-0.7709	0.148489	0.598809	-0.0762864	0.544476	0.0316396	0.101979	0.346274	0.247337	0.31276	1.02011	0.115696	0.876875	0.241052	0.411406	-0.923139	0.35854
-4.2232	-0.607008	0.235962	0.97505	0.548415	1.21933	-0.770363	0.149029	0.598851	-0.0771399	0.544712	0.0314883	0.101603	0.346573	0.247541	0.31255	1.0213	0.115743	0.877086	0.241216	0.411056	-0.922046	0.358978
-4.22272	-0.608061	0.236099	0.974777	0.547756	1.21965	-0.7709	0.150189	0.598874	-0.0777547	0.545126	0.0316597	0.101712	0.346465	0.247787	0.313388	1.02275	0.115915	0.877185	0.240977	0.410818	-0.921309	0.358613
-4.22224	-0.608857	0.236626	0.974963	0.547811	1.22002	-0.770766	0.151579	0.598843	-0.0791329	0.545254	0.03266	0.10119	0.346227	0.24839	0.31381	1.02417	0.116092	0.877389	0.241116	0.410582	-0.920509	0.359023
-4.22176	-0.609565	0.237378	0.975149	0.54745	1.22044	-0.770264	0.151925	0.598908	-0.0791025	0.545318	0.0326444	0.10108	0.346286	0.248724	0.315013	1.02473	0.116486	0.877722	0.240684	0.410447	-0.919671	0.35895
-4.22128	-0.608741	0.237964	0.975421	0.545823	1.22123	-0.769822	0.15307	0.598895	-0.079447	0.545234	0.0329224	0.10081	0.346395	0.249014	0.315558	1.02637	0.116801	0.877837	0.240619	0.410341	-0.91929	0.358987
-4.2208	-0.608999	0.238565	0.975405	0.545302	1.22167	-0.769341	0.15327	0.59901	-0.0797772	0.545384	0.0328294	0.100485	0.34646	0.249112	0.315928	1.02711	0.117089	0.878558	0.240838	0.410284	-0.918608	0.359508
-4.22032	-0.60944	0.239102	0.975456	0.54421	1.22245	-0.768911	0.153039	0.599159	-0.0799691	0.545636	0.0336834	0.100444	0.346763	0.249216	0.316504	1.02825	0.117107	0.878766	0.241074	0.409842	-0.917626	0.359946
-4.21984	-0.610106	0.239741	0.975253	0.542913	1.22251	-0.768271	0.153741	0.599397	-0.0798555	0.545385	0.0335514	0.100219	0.346634	0.249245	0.316898	1.02923	0.117271	0.879217	0.241308	0.409425	-0.916982	0.36003
-4.21936	-0.610573	0.240168	0.975245	0.543649	1.22298	-0.7679	0.153917	0.599388	-0.0809076	0.545078	0.03431	0.0991927	0.346908	0.249161	0.316982	1.03002	0.117075	0.87965	0.241493	0.408998	-0.916668	0.360248
-4.21888	-0.61114	0.240737	0.975724	0.543395	1.22348	-0.76738	0.154453	0.59958	-0.0813975	0.544966	0.0333	0.099288	0.34712	0.249444	0.317417	1.03086	0.117295	0.880102	0.241836	0.408816	-0.916377	0.360663
-4.2184	-0.611101	0.241647	0.975592	0.543007	1.22428	-0.76914	0.155338	0.599552	-0.0808184	0.544636	0.0328664	0.0990715	0.347272	0.249463	0.317286	1.03209	0.117397	0.880441	0.242068	0.408891	-0.916275	0.360864
-4.21792	-0.611319	0.242103	0.975278	0.541763	1.22486	-0.769155	0.156343	0.599655	-0.0806775	0.545269	0.0322328	0.0985717	0.347198	0.250041	0.317265	1.03294	0.117428	0.881047	0.241864	0.408779	-0.914902	0.360824
-4.21744	-0.611996	0.24285	0.975614	0.541576	1.2257	-0.769538	0.156618	0.599695	-0.0800527	0.545282	0.0322564	0.0983294	0.347137	0.249961	0.317398	1.03419	0.117405	0.881748	0.242113	0.408777	-0.913709	0.360984
-4.21696	-0.611581	0.243943	0.97643	0.540965	1.22576	-0.769631	0.156834	0.599575	-0.079266	0.54494	0.0336697	0.0983722	0.347434	0.250168	0.318215	1.03452	0.117319	0.882544	0.242112	0.408703	-0.912656	0.361368
-4.21648	-0.611696	0.245071	0.976504	0.541427	1.22615	-0.76845	0.156961	0.59978	-0.0795724	0.545164	0.033931	0.0982435	0.347839	0.250313	0.318616	1.03597	0.11738	0.88291	0.242546	0.408458	-0.91177	0.362034
-4.216	-0.611547	0.245796	0.97663	0.54135	1.22724	-0.768064	0.157891	0.599744	-0.0786246	0.545543	0.0346147	0.0984167	0.348201	0.250645	0.3188	1.03718	0.117394	0.883339	0.242474	0.408369	-0.910528	0.362549
-4.21552	-0.61176	0.246166	0.976277	0.541761	1.22859	-0.767678	0.157842	0.599775	-0.078504	0.545795	0.0345419	0.098125	0.348248	0.25068	0.319174	1.03807	0.117511	0.88397	0.242612	0.407988	-0.908525	0.362697
-4.21504	-0.612234	0.24681	0.976862	0.541651	1.22874	-0.767865	0.159107	0.600109	-0.0783094	0.545775	0.035036	0.0979912	0.348355	0.25126	0.319632	1.03881	0.117675	0.884353	0.243273	0.408047	-0.906923	0.362974
-4.21456	-0.61145	0.246492	0.976866	0.54098	1.2295	-0.766583	0.159865	0.600114	-0.0780919	0.545838	0.0346461	0.0979648	0.348655	0.251512	0.319863	1.04068	0.117739	0.884561	0.243203	0.407916	-0.905884	0.362984
-4.21408	-0.610616	0.24676	0.977142	0.540496	1.23006	-0.766486	0.160376	0.600192	-0.077303	0.546146	0.0349539	0.097796	0.348694	0.251342	0.320644	1.04161	0.117933	0.885085	0.243453	0.407799	-0.904919	0.363446
-4.2136	-0.611192	0.24723	0.978078	0.540886	1.23147	-0.767635	0.161777	0.600242	-0.0769856	0.546596	0.0339334	0.0972012	0.348933	0.251778	0.321057	1.04294	0.118114	0.88548	0.243304	0.407884	-0.904217	0.363712
-4.21312	-0.611955	0.248008	0.97771	0.539979	1.23153	-0.767156	0.162264	0.600365	-0.0763061	0.546698	0.0337185	0.0973689	0.34917	0.251899	0.321902	1.04406	0.118282	0.885857	0.243473	0.40789	-0.903034	0.3641
-4.21264	-0.611894	0.248942	0.97787	0.539466	1.23224	-0.767075	0.163123	0.600415	-0.0764825	0.547404	0.0341145	0.0972695	0.349491	0.252052	0.322429	1.04534	0.118561	0.886259	0.243241	0.407705	-0.902078	0.363759
-4.21216	-0.611448	0.248511	0.977824	0.539346	1.23232	-0.766969	0.163982	0.600566	-0.0755932	0.548018	0.0339665	0.096983	0.349754	0.252158	0.322671	1.04658	0.118718	0.886863	0.243222	0.407337	-0.901316	0.363943
-4.21168	-0.610538	0.249219	0.979002	0.538818	1.23337	-0.767273	0.165278	0.60063	-0.0746564	0.548647	0.0333078	0.0969258	0.349632	0.252264	0.323635	1.04757	0.118923	0.887414	0.243454	0.407121	-0.900633	0.363854
-4.2112	-0.610318	0.249293	0.978968	0.538613	1.23403	-0.766452	0.166208	0.600575	-0.0745851	0.54873	0.0334369	0.0972861	0.349548	0.252278	0.324112	1.04856	0.119357	0.887927	0.243453	0.406914	-0.899733	0.36344
-4.21072	-0.610544	0.249756	0.97869	0.537205	1.2348	-0.766558	0.167485	0.600777	-0.0746778	0.548742	0.0338758	0.0969171	0.349973	0.252584	0.324503	1.05022	0.11952	0.888234	0.243773	0.406741	-0.899122	0.36359
-4.21024	-0.610481	0.250562	0.978402	0.53632	1.23554	-0.766654	0.168605	0.600722	-0.074039	0.549246	0.0338473	0.0963939	0.350115	0.251946	0.324731	1.05091	0.11954	0.88874	0.244021	0.406834	-0.898336	0.363265
-4.20976	-0.609909	0.251865	0.978181	0.534561	1.23625	-0.767171	0.169523	0.600707	-0.0741702	0.549155	0.0344089	0.0959557	0.350481	0.25227	0.324982	1.05222	0.119843	0.888996	0.244289	0.406689	-0.898044	0.363309
-4.20928	-0.609925	0.252725	0.978696	0.533587	1.23737	-0.768168	0.171129	0.600495	-0.0732728	0.549582	0.0343662	0.0952676	0.350575	0.252661	0.325126	1.0533	0.120526	0.889383	0.244163	0.406968	-0.897329	0.363101
-4.2088	-0.609499	0.253991	0.978459	0.533103	1.23796	-0.768512	0.172166	0.600524	-0.0727017	0.55027	0.0340483	0.0949664	0.350995	0.25289	0.326289	1.05413	0.121082	0.88986	0.244172	0.407182	-0.896852	0.36266
-4.20832	-0.6095	0.254417	0.978244	0.53228	1.23881	-0.768601	0.173441	0.600592	-0.072382	0.550643	0.0340655	0.0948888	0.351312	0.25295	0.326224	1.05573	0.12153	0.890089	0.24426	0.40721	-0.896376	0.362545
-4.20784	-0.609271	0.255589	0.978146	0.530729	1.23923	-0.769338	0.175219	0.60057	-0.0720812	0.550601	0.0344162	0.094394	0.351774	0.252974	0.326509	1.05731	0.121906	0.890303	0.244187	0.406851	-0.895843	0.362051
-4.20736	-0.608928	0.25539	0.978044	0.530921	1.23955	-0.769188	0.176171	0.600465	-0.0711298	0.550532	0.035152	0.0939689	0.352316	0.253196	0.327322	1.05818	0.122238	0.890568	0.244169	0.406606	-0.896075	0.361741
-4.20688	-0.60905	0.255881	0.977995	0.530703	1.24054	-0.769427	0.177372	0.600379	-0.0708827	0.550735	0.0348616	0.0933658	0.352389	0.253405	0.327898	1.05967	0.122551	0.89067	0.243798	0.40655	-0.895799	0.361461
-4.2064	-0.607584	0.256676	0.977357	0.530741	1.2418	-0.769351	0.178226	0.600468	-0.0696308	0.550778	0.0350856	0.093359	0.352903	0.253352	0.32797	1.06055	0.122734	0.89059	0.243798	0.406907	-0.895314	0.361064
-4.20592	-0.607356	0.257926	0.977652	0.530379	1.24259	-0.768705	0.178539	0.60085	-0.0689051	0.550728	0.034219	0.0929744	0.353208	0.254011	0.328618	1.06131	0.122949	0.89093	0.243746	0.406946	-0.89529	0.360588
-4.20544	-0.606803	0.258714	0.977713	0.530662	1.24353	-0.767618	0.179178	0.600379	-0.0683948	0.550796	0.0322323	0.0929038	0.353381	0.254406	0.329167	1.06214	0.122915	0.891258	0.243654	0.407275	-0.895075	0.359777
-4.20496	-0.606438	0.259344	0.977641	0.530144	1.2442	-0.766589	0.180227	0.600376	-0.0680113	0.550547	0.0313235	0.0927177	0.353566	0.255108	0.329847	1.06343	0.122966	0.891385	0.243786	0.407482	-0.894509	0.359446
-4.20448	-0.606145	0.26026	0.977861	0.530715	1.24554	-0.765464	0.181276	0.600313	-0.0675624	0.550875	0.0305576	0.0920979	0.353663	0.255538	0.330578	1.06509	0.123189	0.891755	0.243853	0.407755	-0.893872	0.359143
-4.204	-0.60639	0.260639	0.977174	0.530649	1.24657	-0.764575	0.181552	0.60021	-0.0670113	0.551571	0.0302455	0.0908853	0.353735	0.256174	0.330949	1.06599	0.123141	0.891668	0.2437	0.407709	-0.892742	0.358926
-4.20352	-0.606153	0.261573	0.976733	0.530153	1.24722	-0.764339	0.18191	0.600344	-0.0664414	0.551926	0.0302242	0.0902847	0.353984	0.256231	0.331804	1.06728	0.123281	0.892051	0.243722	0.408135	-0.892248	0.358363
-4.20304	-0.605872	0.262218	0.976381	0.528715	1.24846	-0.765224	0.182339	0.600129	-0.0654123	0.552649	0.0292765	0.090019	0.354621	0.25617	0.331699	1.06837	0.123523	0.892655	0.243882	0.408259	-0.891527	0.358232
-4.20256	-0.60536	0.263307	0.976884	0.528207	1.24911	-0.765692	0.182703	0.600176	-0.0651163	0.553068	0.0294574	0.0902657	0.355067	0.256107	0.331542	1.06886	0.123862	0.892896	0.244168	0.408513	-0.891596	0.358074
-4.20208	-0.604081	0.263893	0.976484	0.528067	1.25021	-0.767175	0.182529	0.600199	-0.0638683	0.553501	0.0288427	0.0896393	0.3556	0.256017	0.332157	1.07004	0.124229	0.893183	0.244242	0.408514	-0.890896	0.357365
-4.2016	-0.603524	0.264619	0.976522	0.528135	1.25073	-0.768639	0.182477	0.599978	-0.0627782	0.553752	0.0282383	0.0891313	0.356669	0.256145	0.332315	1.07078	0.124369	0.8933	0.24431	0.408217	-0.89011	0.35696
-4.20112	-0.603093	0.265341	0.976535	0.527789	1.2517	-0.769064	0.182176	0.5999	-0.0621169	0.554496	0.0271461	0.0889303	0.357883	0.255921	0.332562	1.07098	0.124803	0.893665	0.24416	0.408527	-0.890026	0.3567
-4.20064	-0.602867	0.265892	0.97613	0.526672	1.25235	-0.770185	0.182051	0.599838	-0.0617481	0.554635	0.0272247	0.0892231	0.358071	0.255636	0.332744	1.07175	0.125031	0.894097	0.244363	0.408505	-0.88952	0.356586
-4.20016	-0.601942	0.266198	0.975508	0.525886	1.25278	-0.772208	0.181562	0.59973	-0.0607321	0.555191	0.0275956	0.0889963	0.358452	0.255829	0.333364	1.07265	0.125429	0.894147	0.244356	0.408679	-0.888829	0.356027
-4.19968	-0.601787	0.266684	0.976045	0.524864	1.25343	-0.772613	0.181533	0.599654	-0.0603636	0.555822	0.0267946	0.088723	0.359011	0.255986	0.33331	1.07309	0.125347	0.894283	0.244313	0.40855	-0.888188	0.355775
-4.1992	-0.601733	0.26723	0.976076	0.524344	1.25402	-0.772704	0.182358	0.599447	-0.0598027	0.556685	0.0257092	0.0885202	0.359403	0.255926	0.333125	1.07414	0.125329	0.894507	0.244204	0.408699	-0.887208	0.355627
-4.19872	-0.601366	0.267401	0.976533	0.524131	1.25463	-0.773214	0.182704	0.599571	-0.0584462	0.557541	0.0249932	0.0882486	0.359815	0.256064	0.333222	1.07512	0.125642	0.894729	0.244417	0.408761	-0.887359	0.355233
-4.19824	-0.601525	0.268077	0.976708	0.523713	1.25501	-0.774744	0.1825	0.599771	-0.058047	0.557948	0.0244864	0.0881262	0.36022	0.256196	0.333512	1.07665	0.125764	0.895087	0.244536	0.408761	-0.886486	0.355245
-4.19776	-0.601177	0.268981	0.97656	0.5236	1.2552	-0.77542	0.182269	0.599997	-0.0572656	0.558066	0.0248698	0.0879385	0.360598	0.256639	0.33405	1.07726	0.125959	0.89517	0.244547	0.408569	-0.88553	0.355046
-4.19728	-0.600877	0.269983	0.975748	0.522084	1.25548	-0.776281	0.182531	0.599792	-0.0561257	0.558202	0.0249257	0.0879869	0.361049	0.257332	0.334586	1.07705	0.126279	0.895025	0.244724	0.408809	-0.885134	0.35471
-4.1968	-0.60161	0.27092	0.975743	0.521241	1.25587	-0.776858	0.182504	0.59981	-0.0557485	0.558724	0.0243842	0.0883999	0.36174	0.257402	0.334601	1.07682	0.12681	0.895128	0.245038	0.409484	-0.884538	0.354523
-4.19632	-0.601837	0.271855	0.975729	0.521707	1.25601	-0.777916	0.182505	0.59997	-0.0549165	0.558753	0.0238746	0.0889061	0.362484	0.257196	0.334588	1.0769	0.127248	0.894748	0.245218	0.409699	-0.883835	0.354121
-4.19584	-0.601854	0.272212	0.975406	0.521054	1.25639	-0.77877	0.182498	0.600074	-0.0545517	0.558958	0.0240672	0.0886081	0.362975	0.25766	0.335034	1.0776	0.127974	0.894909	0.245396	0.410005	-0.883236	0.35362
-4.19536	-0.601771	0.272982	0.975155	0.519768	1.25686	-0.778405	0.18247	0.600193	-0.0536715	0.559096	0.024628	0.0881906	0.363735	0.257658	0.334417	1.07801	0.128583	0.89529	0.245518	0.40988	-0.881892	0.35337
-4.19488	-0.601083	0.273574	0.974469	0.519633	1.25714	-0.778811	0.182893	0.600582	-0.0526996	0.559387	0.0246301	0.0882588	0.364241	0.257581	0.335216	1.07882	0.128705	0.895275	0.245517	0.409686	-0.881458	0.353045
-4.1944	-0.600913	0.274051	0.974093	0.519165	1.25701	-0.77751	0.182878	0.600633	-0.0521578	0.560138	0.0246147	0.0878503	0.364643	0.257525	0.335294	1.07904	0.128994	0.89527	0.245239	0.409612	-0.880235	0.353208
-4.19392	-0.601502	0.274609	0.973356	0.518718	1.25735	-0.77832	0.183379	0.600633	-0.0516344	0.560694	0.0252099	0.0876799	0.36537	0.257577	0.335353	1.07937	0.129218	0.895562	0.245193	0.409798	-0.880129	0.353088
-4.19344	-0.601559	0.274793	0.973352	0.517976	1.25805	-0.778216	0.183373	0.600636	-0.0508503	0.561314	0.0255952	0.0873185	0.365593	0.257818	0.33534	1.07947	0.129506	0.895836	0.245023	0.409748	-0.879042	0.352594
-4.19296	-0.601156	0.275684	0.972649	0.516941	1.25889	-0.778362	0.183387	0.600823	-0.0498882	0.561672	0.0264823	0.0868517	0.366313	0.258085	0.335998	1.07947	0.129555	0.896362	0.244835	0.410036	-0.877965	0.352453
-4.19248	-0.601254	0.27611	0.971866	0.516254	1.25947	-0.776848	0.183219	0.600926	-0.0495633	0.562555	0.0260444	0.0869839	0.366887	0.257683	0.335946	1.07945	0.129951	0.896365	0.244663	0.410381	-0.877558	0.352084
-4.192	-0.602062	0.276662	0.970992	0.516466	1.25941	-0.777063	0.182944	0.601076	-0.0490062	0.563472	0.0257818	0.0864736	0.367841	0.258382	0.336256	1.07851	0.130214	0.896391	0.244472	0.410447	-0.87623	0.351988
-4.19152	-0.601989	0.277287	0.970041	0.515581	1.25968	-0.777595	0.183297	0.601277	-0.0485363	0.563874	0.0257006	0.08629	0.368287	0.258414	0.335838	1.07878	0.130433	0.8966	0.244521	0.410644	-0.876214	0.351983
-4.19104	-0.602485	0.276457	0.969533	0.514408	1.26016	-0.779214	0.183877	0.601304	-0.0483993	0.564235	0.0262139	0.0865828	0.369031	0.258648	0.336202	1.0795	0.130871	0.896452	0.244309	0.41074	-0.875744	0.35172
-4.19056	-0.602564	0.276794	0.969126	0.513063	1.26054	-0.77894	0.184052	0.601503	-0.0479702	0.564032	0.0257777	0.0865598	0.369855	0.258727	0.336456	1.07987	0.131254	0.896513	0.24426	0.410504	-0.875931	0.351419
-4.19008	-0.603008	0.277277	0.968664	0.511494	1.26106	-0.779397	0.184352	0.601396	-0.047564	0.564585	0.0259133	0.0861146	0.36984	0.25839	0.336765	1.08021	0.131454	0.896318	0.244324	0.410591	-0.875241	0.350943
-4.1896	-0.603314	0.277533	0.969311	0.509704	1.26109	-0.780636	0.184816	0.60136	-0.0476219	0.564728	0.0258225	0.0862966	0.370324	0.2581	0.337119	1.07989	0.13184	0.896596	0.244498	0.410501	-0.874759	0.351017
-4.18912	-0.603233	0.278295	0.96943	0.508573	1.26136	-0.780932	0.185336	0.601406	-0.0471434	0.565253	0.0266508	0.086334	0.370714	0.257773	0.337518	1.08029	0.13222	0.896407	0.244236	0.410817	-0.874658	0.350953
-4.18864	-0.603671	0.279045	0.969285	0.507627	1.26151	-0.78075	0.185365	0.601577	-0.0465028	0.565827	0.0261497	0.0859131	0.371241	0.258107	0.338103	1.08057	0.132475	0.896057	0.244241	0.411013	-0.874144	0.350525
-4.18816	-0.603378	0.279028	0.969667	0.507126	1.26194	-0.781818	0.186484	0.60175	-0.0462599	0.56631	0.0277627	0.0858146	0.371703	0.258193	0.337987	1.08108	0.133067	0.895867	0.244308	0.411259	-0.873899	0.350761
-4.18768	-0.603792	0.280334	0.97002	0.506956	1.26208	-0.78201	0.187146	0.601761	-0.0455645	0.56644	0.0283059	0.0857259	0.37155	0.258602	0.337303	1.08151	0.13343	0.895524	0.244354	0.411598	-0.874002	0.350524
-4.1872	-0.602984	0.281075	0.969797	0.50643	1.26185	-0.781789	0.188019	0.601662	-0.0447807	0.566759	0.0284164	0.0848088	0.371939	0.258675	0.33738	1.08169	0.133673	0.895413	0.244465	0.411551	-0.873709	0.350449
-4.18672	-0.602311	0.281542	0.969792	0.506184	1.26206	-0.780716	0.188317	0.602041	-0.0450785	0.566657	0.0287468	0.0846396	0.372855	0.258805	0.337571	1.082	0.134	0.895053	0.244344	0.411108	-0.873121	0.350002
-4.18624	-0.601997	0.281758	0.969211	0.506061	1.26254	-0.780268	0.188202	0.602015	-0.0446758	0.567178	0.0293046	0.0839301	0.373491	0.259262	0.337014	1.08265	0.134263	0.895067	0.244133	0.411343	-0.872218	0.35001
-4.18576	-0.601557	0.282408	0.969866	0.50719	1.26246	-0.778834	0.188599	0.602276	-0.0449346	0.567511	0.0285038	0.0832396	0.373889	0.259324	0.33727	1.08285	0.134289	0.895045	0.244256	0.411186	-0.872312	0.34994
-4.18528	-0.60184	0.282951	0.969467	0.506015	1.26317	-0.77822	0.189488	0.602359	-0.0443087	0.568302	0.0286874	0.0825753	0.374139	0.259761	0.337358	1.0835	0.134797	0.894773	0.244426	0.411042	-0.872109	0.350025
-4.1848	-0.601521	0.284332	0.969767	0.505287	1.26356	-0.777015	0.190191	0.602366	-0.0446336	0.568369	0.0289689	0.0823426	0.374581	0.260181	0.337581	1.08401	0.135121	0.894607	0.244906	0.410976	-0.871739	0.349902
-4.18432	-0.601667	0.284458	0.970183	0.503819	1.26323	-0.776079	0.191202	0.60247	-0.0448432	0.569061	0.0292213	0.0817366	0.37496	0.26077	0.337464	1.08384	0.135421	0.894689	0.244956	0.410862	-0.871956	0.350254
-4.18384	-0.601275	0.284275	0.970882	0.502848	1.26359	-0.777187	0.191743	0.602544	-0.044417	0.569701	0.0304587	0.08109	0.37503	0.260673	0.337268	1.08404	0.135504	0.895017	0.244975	0.410744	-0.871704	0.349807
-4.18336	-0.602084	0.284222	0.970865	0.502863	1.26363	-0.777319	0.192086	0.602869	-0.0448401	0.5702	0.0317508	0.0804455	0.375237	0.260764	0.337374	1.08417	0.13594	0.895041	0.244918	0.410481	-0.871585	0.349511
-4.18288	-0.601579	0.285072	0.971001	0.502452	1.26464	-0.774976	0.192217	0.60295	-0.0451463	0.570741	0.032003	0.0800574	0.375509	0.260351	0.337187	1.08479	0.136225	0.895137	0.245023	0.410508	-0.871869	0.349386
-4.1824	-0.601618	0.286577	0.971488	0.502254	1.26468	-0.774356	0.192898	0.603165	-0.0455949	0.571694	0.0325601	0.0793414	0.3757	0.260485	0.336291	1.08503	0.136391	0.895114	0.245443	0.410571	-0.871677	0.349324
-4.18192	-0.601914	0.28684	0.971855	0.501068	1.26506	-0.773864	0.193209	0.603145	-0.0457724	0.572294	0.0337628	0.079174	0.375666	0.260419	0.336475	1.08505	0.136752	0.89505	0.245515	0.410614	-0.871535	0.349209
-4.18144	-0.602022	0.287417	0.971861	0.500957	1.26588	-0.773781	0.193166	0.603025	-0.0459979	0.573192	0.0344473	0.0795387	0.375957	0.261008	0.336278	1.08492	0.136695	0.895074	0.245407	0.410572	-0.871148	0.348891
-4.18096	-0.601583	0.287984	0.972307	0.50063	1.26652	-0.773728	0.193819	0.60296	-0.0467158	0.573754	0.0357746	0.0796368	0.375926	0.261165	0.335949	1.08462	0.136809	0.894895	0.2454	0.410152	-0.870695	0.34874
-4.18048	-0.601629	0.2888	0.972865	0.50036	1.2672	-0.773726	0.194172	0.603021	-0.0466684	0.574273	0.0352264	0.0792169	0.376373	0.26106	0.335762	1.08473	0.137068	0.89489	0.245669	0.41031	-0.870112	0.348678
-4.18	-0.600958	0.289047	0.972346	0.500833	1.26728	-0.772724	0.194697	0.602928	-0.046651	0.575107	0.0363645	0.0793271	0.377066	0.261373	0.335793	1.08491	0.13734	0.894633	0.24604	0.410371	-0.870067	0.348755
-4.17952	-0.600799	0.289954	0.972556	0.500587	1.26735	-0.772155	0.195031	0.603093	-0.0461598	0.575314	0.0368185	0.0794563	0.377185	0.261584	0.335615	1.08485	0.137599	0.894553	0.245958	0.410389	-0.870364	0.348716
-4.17904	-0.601018	0.290658	0.972793	0.500107	1.26803	-0.772089	0.196094	0.603306	-0.0460499	0.575442	0.0374357	0.079528	0.377502	0.261749	0.335551	1.08521	0.137663	0.894737	0.245957	0.410733	-0.87012	0.348753
-4.17856	-0.600914	0.291227	0.972676	0.499358	1.26859	-0.771831	0.196399	0.603355	-0.0461516	0.576041	0.0379581	0.0794026	0.3775	0.261825	0.335181	1.08557	0.137703	0.895127	0.245993	0.410847	-0.869718	0.348646
-4.17808	-0.600774	0.291967	0.973525	0.498468	1.26925	-0.771961	0.19713	0.603139	-0.0457244	0.577412	0.039741	0.0791929	0.377607	0.261949	0.334592	1.08577	0.13804	0.895103	0.245756	0.411179	-0.869467	0.348864
-4.1776	-0.600688	0.292055	0.972956	0.49788	1.26981	-0.772381	0.19781	0.603056	-0.0457972	0.578675	0.0408472	0.0795153	0.377432	0.261816	0.335037	1.08631	0.13821	0.895241	0.245873	0.411136	-0.869106	0.348805
-4.17712	-0.601028	0.292255	0.972523	0.497577	1.27094	-0.772219	0.197409	0.603107	-0.0453523	0.579092	0.0414981	0.0794147	0.377428	0.261835	0.335142	1.08663	0.138061	0.895378	0.245979	0.411405	-0.868836	0.348737
-4.17664	-0.600979	0.292716	0.97149	0.49654	1.27132	-0.773377	0.197501	0.603015	-0.0454441	0.579493	0.0424876	0.0780539	0.377288	0.261702	0.334826	1.0864	0.138432	0.895544	0.245803	0.411203	-0.867907	0.348705
-4.17616	-0.600817	0.292923	0.971768	0.496338	1.27213	-0.773331	0.197991	0.602867	-0.045213	0.579812	0.0432171	0.0777477	0.377368	0.261783	0.335009	1.08684	0.138713	0.895757	0.245855	0.411396	-0.867055	0.34874
-4.17568	-0.599965	0.293269	0.971591	0.495169	1.27305	-0.773081	0.198858	0.60292	-0.0441139	0.580585	0.0433456	0.0777013	0.377305	0.262401	0.334426	1.08706	0.139024	0.895979	0.246177	0.411343	-0.866152	0.348876
-4.1752	-0.599697	0.293588	0.971658	0.494874	1.27438	-0.773455	0.199221	0.602785	-0.0439311	0.581472	0.0440298	0.07695	0.376958	0.26211	0.334495	1.08774	0.139137	0.896099	0.246526	0.411129	-0.865429	0.348924
-4.17472	-0.599601	0.294304	0.971727	0.494289	1.27504	-0.772974	0.199638	0.602663	-0.0438345	0.582206	0.0442778	0.0767803	0.377268	0.262275	0.334497	1.08859	0.139277	0.896418	0.246617	0.411022	-0.865685	0.34931
-4.17424	-0.600332	0.294042	0.9715	0.493867	1.27589	-0.772923	0.199885	0.602556	-0.0434982	0.582996	0.043596	0.0761548	0.377508	0.262728	0.334217	1.08883	0.139352	0.896945	0.247152	0.411056	-0.865075	0.349691
-4.17376	-0.600422	0.29475	0.971661	0.492568	1.27634	-0.772761	0.20006	0.602379	-0.0433259	0.58399	0.0438239	0.0761104	0.377286	0.262899	0.334498	1.08922	0.139633	0.897423	0.247339	0.411053	-0.864638	0.349993
-4.17328	-0.600639	0.295221	0.971174	0.492647	1.27694	-0.772857	0.199817	0.602382	-0.0425529	0.584811	0.0438719	0.0753944	0.377475	0.263065	0.334179	1.09054	0.139669	0.897645	0.247153	0.411175	-0.864603	0.350433
-4.1728	-0.600795	0.294699	0.970264	0.492254	1.27728	-0.772277	0.200093	0.602429	-0.0419008	0.585332	0.0442244	0.0741407	0.37807	0.262941	0.334099	1.09022	0.139778	0.898092	0.247479	0.411166	-0.864169	0.350654
-4.17232	-0.600563	0.295037	0.969777	0.492054	1.27791	-0.772168	0.200381	0.602312	-0.0418738	0.586004	0.0441783	0.073392	0.378405	0.263187	0.334207	1.09108	0.14011	0.898528	0.247496	0.411301	-0.863354	0.350775
-4.17184	-0.601218	0.294934	0.969658	0.491524	1.27888	-0.771069	0.200965	0.602189	-0.0426331	0.586535	0.0450288	0.0731621	0.378725	0.263181	0.334298	1.09128	0.140104	0.898601	0.247486	0.411189	-0.863079	0.350884
-4.17136	-0.600619	0.295173	0.969891	0.490738	1.27926	-0.770861	0.20161	0.602284	-0.0425343	0.587353	0.0468623	0.0728949	0.378739	0.263493	0.334008	1.09147	0.140442	0.898806	0.247342	0.41112	-0.862534	0.350668
-4.17088	-0.600441	0.296044	0.969809	0.48991	1.27993	-0.770629	0.201855	0.602027	-0.0427023	0.588096	0.0474184	0.0724632	0.378569	0.263885	0.334046	1.09129	0.14079	0.898818	0.247302	0.411002	-0.862158	0.35121
-4.1704	-0.60049	0.296347	0.969752	0.490913	1.2804	-0.769408	0.201958	0.601655	-0.0421644	0.58853	0.0487308	0.0716993	0.378469	0.264073	0.334106	1.09157	0.14082	0.899097	0.247619	0.410544	-0.861486	0.351371
-4.16992	-0.600338	0.296144	0.969988	0.490596	1.28061	-0.76911	0.20254	0.601408	-0.042172	0.590151	0.0497026	0.0712526	0.378581	0.263797	0.333901	1.09233	0.141048	0.899326	0.247448	0.410561	-0.860939	0.351796
-4.16944	-0.60144	0.296698	0.969824	0.490072	1.28134	-0.769085	0.202896	0.601346	-0.042344	0.591008	0.0505186	0.0720388	0.37824	0.263647	0.333787	1.09251	0.141142	0.900132	0.247589	0.410974	-0.86081	0.3519
-4.16896	-0.6016	0.296965	0.969165	0.489514	1.28206	-0.768086	0.203238	0.60131	-0.0427031	0.591983	0.050173	0.072046	0.378494	0.263655	0.334247	1.09205	0.141471	0.900133	0.247754	0.410936	-0.860421	0.352251
-4.16848	-0.60194	0.297509	0.968929	0.489683	1.28236	-0.767622	0.203731	0.601038	-0.0429357	0.593484	0.0495389	0.071996	0.378887	0.263212	0.334746	1.09225	0.14159	0.900363	0.247784	0.410947	-0.859289	0.352366
-4.168	-0.602037	0.298332	0.969144	0.491132	1.2823	-0.767522	0.204944	0.600986	-0.0431877	0.593992	0.0504799	0.0722687	0.378944	0.263586	0.334282	1.09248	0.141712	0.90085	0.247644	0.411179	-0.858346	0.352169
-4.16752	-0.601835	0.298782	0.969614	0.490774	1.28232	-0.767164	0.206214	0.600962	-0.0434711	0.594807	0.0512611	0.0718055	0.37915	0.263948	0.333899	1.09308	0.142085	0.901276	0.247923	0.411337	-0.857659	0.352019
-4.16704	-0.601687	0.299444	0.969887	0.49172	1.28258	-0.767064	0.206496	0.600854	-0.0434524	0.596243	0.0519252	0.0733018	0.379049	0.264138	0.333677	1.09385	0.142648	0.901761	0.247795	0.411099	-0.857693	0.352287
-4.16656	-0.601268	0.300179	0.969774	0.491086	1.28283	-0.766485	0.206754	0.600655	-0.0435707	0.596965	0.0509587	0.0734627	0.379301	0.263999	0.332952	1.09492	0.142833	0.902382	0.247775	0.411348	-0.857345	0.352688
-4.16608	-0.60096	0.300629	0.969764	0.490631	1.28269	-0.766683	0.20707	0.600737	-0.0435483	0.597886	0.0517542	0.0732157	0.379552	0.264143	0.332733	1.09584	0.142955	0.90268	0.247752	0.411564	-0.856667	0.353029
-4.1656	-0.600313	0.301496	0.969206	0.490161	1.28291	-0.767827	0.207849	0.600639	-0.0440883	0.599343	0.05141	0.0727805	0.379592	0.263738	0.331924	1.09626	0.143022	0.903187	0.248041	0.411913	-0.856696	0.353329
-4.16512	-0.600781	0.301996	0.969115	0.490083	1.28295	-0.7673	0.208421	0.600563	-0.0442054	0.600079	0.051243	0.0722069	0.380057	0.263066	0.331449	1.09745	0.143029	0.903642	0.248194	0.411965	-0.856422	0.353133
-4.16464	-0.600988	0.302595	0.968567	0.489353	1.28395	-0.766613	0.208804	0.600498	-0.044457	0.600941	0.0523354	0.0718541	0.380231	0.263076	0.331578	1.0983	0.14289	0.90405	0.248363	0.411815	-0.856248	0.353083
-4.16416	-0.601045	0.302979	0.969132	0.489268	1.28413	-0.765515	0.209561	0.600436	-0.0446853	0.601243	0.0530389	0.0719918	0.380441	0.262892	0.331027	1.09853	0.143017	0.904068	0.248308	0.411816	-0.8553	0.353322
-4.16368	-0.600402	0.303666	0.968867	0.489715	1.2843	-0.764779	0.210234	0.600478	-0.0450146	0.601987	0.0530712	0.0719348	0.381002	0.262961	0.331165	1.0997	0.142903	0.904339	0.248303	0.411597	-0.854857	0.353564
-4.1632	-0.599773	0.304035	0.968801	0.489244	1.28434	-0.764402	0.210751	0.600581	-0.0454201	0.603	0.0537178	0.0722655	0.381253	0.263612	0.330557	1.09994	0.14306	0.904678	0.248491	0.411891	-0.854255	0.35368
-4.16272	-0.598896	0.304656	0.968776	0.488827	1.28478	-0.764839	0.21096	0.600824	-0.0452004	0.603991	0.0546518	0.0720996	0.381518	0.263219	0.330548	1.10068	0.143081	0.905283	0.248808	0.412196	-0.85418	0.353836
-4.16224	-0.599288	0.304767	0.969021	0.489374	1.2848	-0.764809	0.211206	0.60099	-0.0457514	0.604978	0.0559069	0.0716923	0.38162	0.26367	0.33061	1.10143	0.14308	0.905662	0.249072	0.411886	-0.853835	0.354412
-4.16176	-0.598477	0.305145	0.968395	0.489769	1.28479	-0.764585	0.211502	0.600886	-0.046396	0.605895	0.0568262	0.071187	0.381734	0.263828	0.330444	1.10198	0.143065	0.905471	0.249317	0.412168	-0.85361	0.354259
-4.16128	-0.598632	0.305578	0.968291	0.490724	1.285	-0.764546	0.212205	0.601164	-0.0467468	0.606563	0.0575784	0.0715822	0.381899	0.264034	0.330169	1.10367	0.143155	0.906024	0.249639	0.412279	-0.853061	0.353827
-4.1608	-0.599013	0.306215	0.968621	0.490291	1.28496	-0.76473	0.213134	0.601266	-0.0466218	0.607674	0.0599091	0.0719075	0.382391	0.263836	0.32938	1.10427	0.143026	0.906136	0.249533	0.412107	-0.852343	0.35418
-4.16032	-0.598898	0.306902	0.968368	0.490443	1.28532	-0.764822	0.213405	0.601299	-0.0465391	0.607896	0.0614683	0.0718575	0.382665	0.26502	0.329499	1.10466	0.143045	0.906255	0.24982	0.412084	-0.851703	0.354217
-4.15984	-0.598593	0.307368	0.968515	0.490799	1.28598	-0.765175	0.214237	0.601296	-0.0468215	0.608424	0.0626472	0.0716446	0.382797	0.265104	0.328942	1.10552	0.143042	0.90672	0.250134	0.412061	-0.851622	0.354151
-4.15936	-0.598589	0.308166	0.968465	0.491647	1.28615	-0.763482	0.215029	0.601247	-0.0468404	0.609159	0.063444	0.0717144	0.382858	0.265257	0.329397	1.10593	0.143156	0.906878	0.250618	0.411821	-0.851469	0.354077
-4.15888	-0.598435	0.308128	0.968749	0.491405	1.28639	-0.763565	0.216081	0.601146	-0.0462855	0.609646	0.0628603	0.0720788	0.383121	0.265002	0.329765	1.10658	0.143155	0.907374	0.250417	0.41204	-0.850846	0.354239
-4.1584	-0.598637	0.308644	0.968729	0.492301	1.28647	-0.763023	0.216387	0.601238	-0.0469418	0.610195	0.0637131	0.0725646	0.383203	0.265299	0.329801	1.10668	0.143003	0.907772	0.250874	0.412104	-0.850651	0.354617
-4.15792	-0.597724	0.308672	0.969614	0.49285	1.28683	-0.762314	0.217502	0.601325	-0.0475535	0.610993	0.0640026	0.0725283	0.383133	0.265106	0.330497	1.10702	0.142959	0.907882	0.251516	0.411948	-0.850418	0.354788
-4.15744	-0.597789	0.308751	0.970356	0.49325	1.28664	-0.761827	0.217904	0.601277	-0.0480378	0.611194	0.065209	0.0729276	0.383301	0.265262	0.330741	1.10674	0.143053	0.908284	0.251621	0.411998	-0.850326	0.355176
-4.15696	-0.597994	0.30943	0.970612	0.493686	1.2867	-0.761689	0.218361	0.601245	-0.0480663	0.611769	0.0667855	0.0732867	0.383266	0.265109	0.331056	1.10749	0.143246	0.908461	0.25228	0.411939	-0.849919	0.355703
-4.15648	-0.597197	0.308977	0.970088	0.494644	1.28712	-0.761429	0.218972	0.601181	-0.0478511	0.612433	0.0678216	0.0743757	0.383122	0.264622	0.331112	1.10773	0.143202	0.908915	0.252764	0.41183	-0.848898	0.356102
-4.156	-0.596448	0.309581	0.970548	0.494493	1.28783	-0.761398	0.2199	0.601531	-0.0478365	0.612975	0.0705107	0.0750228	0.383217	0.264565	0.330888	1.10774	0.143309	0.90906	0.253456	0.411679	-0.848074	0.356498
-4.15552	-0.596618	0.309713	0.970299	0.495319	1.28818	-0.760868	0.220881	0.601477	-0.0477882	0.613764	0.0709503	0.0754637	0.383346	0.264841	0.330875	1.1085	0.14327	0.909338	0.253902	0.411557	-0.84827	0.356645
-4.15504	-0.597071	0.31027	0.970481	0.495368	1.28913	-0.760625	0.221185	0.601539	-0.047358	0.614557	0.0717211	0.0756596	0.383761	0.264522	0.33146	1.10831	0.143103	0.909487	0.254335	0.411677	-0.848251	0.357128
-4.15456	-0.597135	0.310673	0.971069	0.4952	1.28959	-0.759913	0.221742	0.601315	-0.0466837	0.615236	0.0725946	0.0759591	0.383326	0.264815	0.331766	1.10782	0.142845	0.909633	0.255211	0.411601	-0.846929	0.357434
-4.15408	-0.59679	0.310499	0.971423	0.495407	1.29033	-0.759915	0.223322	0.60133	-0.046116	0.615385	0.0734779	0.0767297	0.383095	0.264584	0.331971	1.10804	0.142819	0.909873	0.255342	0.411759	-0.846772	0.3577
-4.1536	-0.597037	0.310904	0.971352	0.494706	1.29078	-0.760279	0.223664	0.601488	-0.045538	0.615716	0.0736716	0.0772792	0.382994	0.26435	0.332318	1.10786	0.142956	0.910042	0.255324	0.411879	-0.846325	0.358481
-4.15312	-0.5965	0.311568	0.97159	0.493997	1.2911	-0.760177	0.224293	0.601627	-0.0460709	0.616369	0.0734119	0.0778765	0.382473	0.264862	0.332246	1.10837	0.142741	0.909834	0.25559	0.411634	-0.845292	0.358623
-4.15264	-0.596238	0.311856	0.972323	0.493781	1.29294	-0.759382	0.225198	0.601338	-0.0456948	0.617099	0.07441	0.077915	0.382449	0.26497	0.331824	1.10919	0.142643	0.910155	0.256083	0.411428	-0.844303	0.358805
-4.15216	-0.595862	0.311958	0.972997	0.493045	1.29333	-0.760748	0.225987	0.601479	-0.0448155	0.617804	0.0752158	0.0785771	0.381979	0.265043	0.330974	1.10932	0.142829	0.91021	0.256302	0.411203	-0.844201	0.359026
-4.15168	-0.595321	0.312418	0.973339	0.493216	1.29386	-0.760932	0.226182	0.60153	-0.044505	0.618533	0.0756924	0.0790512	0.382563	0.265161	0.33009	1.10955	0.142899	0.910619	0.256327	0.411459	-0.843749	0.359483
-4.1512	-0.594126	0.312712	0.973509	0.49344	1.29458	-0.760469	0.22604	0.601517	-0.0445626	0.619134	0.0771258	0.0793746	0.382618	0.265265	0.330056	1.11054	0.142926	0.910354	0.256803	0.411636	-0.84291	0.359623
-4.15072	-0.593436	0.312872	0.97394	0.493147	1.29531	-0.758893	0.226501	0.601693	-0.0440601	0.620114	0.0777294	0.0797612	0.382656	0.26539	0.329916	1.11054	0.142764	0.910341	0.256941	0.411395	-0.842657	0.359807
-4.15024	-0.592808	0.31305	0.974121	0.494302	1.29586	-0.758619	0.226377	0.601774	-0.0439646	0.620497	0.0769662	0.0809986	0.382757	0.265272	0.33008	1.11057	0.142578	0.910629	0.257517	0.411073	-0.842604	0.359824
-4.14976	-0.592856	0.313268	0.974687	0.493927	1.29657	-0.758231	0.227327	0.60196	-0.0439457	0.620623	0.0778966	0.0808806	0.382626	0.265243	0.329815	1.11071	0.142585	0.911093	0.257734	0.410999	-0.842205	0.359986
-4.14928	-0.592755	0.313889	0.974945	0.494273	1.29734	-0.75766	0.22843	0.601964	-0.043122	0.621223	0.0789934	0.0812669	0.382785	0.265763	0.329712	1.11171	0.14255	0.911197	0.257828	0.411046	-0.841745	0.360356
-4.1488	-0.592639	0.314278	0.975094	0.493587	1.29822	-0.756512	0.228211	0.601943	-0.0427499	0.621806	0.0796413	0.0816095	0.382975	0.265791	0.32881	1.11188	0.142468	0.911623	0.257893	0.411135	-0.84109	0.361065
-4.14832	-0.592321	0.314517	0.975211	0.493593	1.2989	-0.756634	0.228803	0.602002	-0.0417294	0.62226	0.0815153	0.0819359	0.38289	0.265686	0.328984	1.11185	0.142439	0.912074	0.25812	0.411178	-0.840565	0.361282
-4.14784	-0.592301	0.315073	0.975092	0.494378	1.29987	-0.755119	0.228584	0.601828	-0.0409274	0.622619	0.0826195	0.0819677	0.383089	0.266392	0.329438	1.11252	0.142497	0.912186	0.258467	0.411479	-0.840489	0.361264
-4.14736	-0.5926	0.314951	0.975447	0.495341	1.30069	-0.75403	0.228802	0.601757	-0.0407594	0.622724	0.0838492	0.0821366	0.382989	0.266298	0.329563	1.11284	0.14255	0.912454	0.258514	0.411443	-0.840529	0.361488
-4.14688	-0.593187	0.315422	0.975094	0.495628	1.30133	-0.75267	0.228855	0.601758	-0.0402112	0.623682	0.084253	0.0818477	0.383104	0.266469	0.330142	1.11299	0.142731	0.912432	0.258674	0.411458	-0.840092	0.362001
-4.1464	-0.593458	0.315515	0.97507	0.494699	1.3019	-0.752617	0.228897	0.601945	-0.0397417	0.624067	0.0858266	0.0818727	0.383538	0.26723	0.330903	1.11315	0.14273	0.912463	0.258852	0.411725	-0.839676	0.362483
-4.14592	-0.593684	0.316297	0.975366	0.49527	1.30287	-0.751988	0.228847	0.601879	-0.039386	0.624717	0.0864225	0.0824628	0.383905	0.267801	0.331261	1.11319	0.142851	0.913074	0.258714	0.411903	-0.839086	0.362673
-4.14544	-0.593788	0.316759	0.975457	0.495269	1.30364	-0.750944	0.229072	0.601754	-0.0391298	0.625127	0.0885281	0.0820886	0.384366	0.268029	0.331067	1.11375	0.143114	0.91359	0.258822	0.41214	-0.83795	0.362526
-4.14496	-0.593419	0.317665	0.976295	0.495312	1.30412	-0.750488	0.228897	0.60192	-0.0387545	0.625648	0.0882272	0.0826614	0.384355	0.269015	0.33117	1.11405	0.143236	0.913817	0.259128	0.411561	-0.837174	0.362752
-4.14448	-0.593773	0.317468	0.976742	0.495775	1.30443	-0.749871	0.228323	0.601898	-0.0384159	0.626344	0.0891067	0.0830626	0.384728	0.269177	0.331383	1.11458	0.143502	0.913965	0.259108	0.411717	-0.83673	0.36278
-4.144	-0.594399	0.317496	0.977477	0.49495	1.30506	-0.749865	0.228093	0.601801	-0.0390781	0.627235	0.0889699	0.0828687	0.384937	0.269492	0.331987	1.1148	0.143542	0.914121	0.259233	0.411839	-0.836284	0.362911
-4.14352	-0.594774	0.317587	0.978221	0.495035	1.30615	-0.749466	0.228829	0.601462	-0.0391884	0.627833	0.0902664	0.0828001	0.385219	0.269646	0.332288	1.11545	0.144081	0.914356	0.259524	0.412124	-0.835387	0.362968
-4.14304	-0.594804	0.318181	0.978201	0.495342	1.30605	-0.749042	0.229075	0.601352	-0.0393085	0.628422	0.0898273	0.0828458	0.385436	0.269651	0.331892	1.11528	0.144257	0.914509	0.259558	0.412057	-0.835037	0.363097
-4.14256	-0.595896	0.318753	0.979026	0.495453	1.30672	-0.748273	0.22981	0.601346	-0.0391809	0.628561	0.0894065	0.0828344	0.385282	0.269789	0.33184	1.11611	0.144152	0.915046	0.259685	0.4121	-0.834375	0.363235
-4.14208	-0.595958	0.318831	0.979274	0.495118	1.30693	-0.74749	0.230258	0.601423	-0.0383924	0.628665	0.0894119	0.0834149	0.385453	0.270015	0.331472	1.11636	0.144176	0.915167	0.260074	0.412383	-0.833694	0.363428
-4.1416	-0.59621	0.318709	0.979365	0.493118	1.3073	-0.748063	0.230782	0.601424	-0.0386967	0.629109	0.0899564	0.0834568	0.386053	0.269905	0.331391	1.1164	0.1444	0.91584	0.260002	0.412626	-0.833483	0.363637
-4.14112	-0.596808	0.318598	0.979425	0.493185	1.30789	-0.747572	0.231231	0.601516	-0.0386537	0.629359	0.090779	0.0829308	0.385867	0.270235	0.331196	1.11709	0.144499	0.91622	0.260418	0.412615	-0.832093	0.364079
-4.14064	-0.596447	0.31886	0.979657	0.493229	1.30845	-0.746848	0.232452	0.601456	-0.0391391	0.629281	0.0908562	0.0832754	0.386472	0.27065	0.332062	1.11781	0.144802	0.916699	0.260871	0.412519	-0.830644	0.364352
-4.14016	-0.596789	0.319077	0.978857	0.492809	1.30874	-0.746591	0.232997	0.601432	-0.0395395	0.629683	0.0921915	0.0838005	0.386719	0.270926	0.331658	1.11862	0.144832	0.916969	0.260863	0.412242	-0.830661	0.364267
-4.13968	-0.597358	0.319046	0.979106	0.491302	1.30845	-0.74636	0.233438	0.601584	-0.0398799	0.629781	0.0934804	0.0842479	0.386962	0.271329	0.331354	1.11955	0.145086	0.917258	0.2612	0.412262	-0.830054	0.364492
-4.1392	-0.598179	0.319034	0.979445	0.490787	1.30841	-0.746134	0.234353	0.60158	-0.0402608	0.629389	0.0951121	0.0846319	0.387101	0.271312	0.331177	1.1207	0.145507	0.91755	0.261538	0.413079	-0.829595	0.36439
-4.13872	-0.599136	0.319102	0.979118	0.489646	1.3091	-0.745666	0.234024	0.601491	-0.0407048	0.629774	0.0954815	0.0844106	0.3872	0.271824	0.33072	1.12136	0.145367	0.91741	0.261802	0.412935	-0.828894	0.364618
-4.13824	-0.5995	0.319071	0.979519	0.489404	1.30956	-0.744963	0.23443	0.601558	-0.0408122	0.629616	0.0958717	0.0849697	0.387631	0.272138	0.330611	1.1222	0.145651	0.917132	0.261699	0.412772	-0.82803	0.364842
-4.13776	-0.599595	0.319403	0.978916	0.487989	1.30962	-0.745636	0.234889	0.601389	-0.0412567	0.629256	0.0964736	0.0850219	0.387735	0.272095	0.330991	1.12315	0.145942	0.9168	0.2618	0.412393	-0.827336	0.364975
-4.13728	-0.599197	0.319219	0.98003	0.487395	1.30975	-0.74575	0.235184	0.60138	-0.0422818	0.628949	0.0974603	0.0847941	0.388048	0.272291	0.330693	1.12324	0.146147	0.917227	0.261818	0.412485	-0.826622	0.364793
-4.1368	-0.599177	0.319021	0.980354	0.486957	1.30975	-0.744722	0.235584	0.601446	-0.0428052	0.629358	0.0977321	0.0852527	0.388503	0.272476	0.330952	1.12434	0.146172	0.917091	0.261731	0.412165	-0.826267	0.364891
-4.13632	-0.599984	0.318441	0.98079	0.487217	1.30947	-0.745029	0.235833	0.601626	-0.0429644	0.629447	0.0983467	0.0843774	0.38893	0.272546	0.330572	1.12479	0.146455	0.917488	0.262061	0.412874	-0.825443	0.365329
-4.13584	-0.600563	0.31871	0.980855	0.487028	1.31034	-0.744457	0.236432	0.601641	-0.0432627	0.629306	0.0987564	0.0841583	0.389171	0.272794	0.330692	1.12482	0.146348	0.917385	0.262242	0.413238	-0.825396	0.365764
-4.13536	-0.600649	0.318701	0.980639	0.487025	1.31083	-0.744086	0.236791	0.601916	-0.0437211	0.629282	0.100103	0.0843335	0.389478	0.273064	0.330347	1.12544	0.146345	0.917753	0.2629	0.413132	-0.824924	0.365751
-4.13488	-0.600496	0.318924	0.980295	0.486819	1.31121	-0.742991	0.23726	0.601907	-0.0439091	0.628975	0.100958	0.0844245	0.390014	0.27312	0.330504	1.1258	0.146394	0.91808	0.263136	0.413123	-0.824669	0.365641
-4.1344	-0.600738	0.318313	0.980771	0.486262	1.31171	-0.742441	0.237394	0.601987	-0.0435357	0.629638	0.102575	0.0841797	0.390115	0.2732	0.329661	1.12664	0.146383	0.918586	0.263239	0.413013	-0.824742	0.365675
-4.13392	-0.600743	0.318268	0.980878	0.485774	1.31185	-0.742569	0.237686	0.602097	-0.0438356	0.62979	0.103999	0.0839913	0.390378	0.273156	0.329223	1.12741	0.146502	0.919261	0.263504	0.413465	-0.824817	0.365982
-4.13344	-0.600632	0.317851	0.980542	0.484972	1.31225	-0.742791	0.237296	0.602404	-0.0443209	0.629808	0.103864	0.0831307	0.390691	0.273277	0.328833	1.12797	0.146587	0.919612	0.263428	0.413453	-0.824776	0.365874
-4.13296	-0.602167	0.317469	0.980991	0.484849	1.3126	-0.741656	0.23828	0.602524	-0.0441218	0.629749	0.103449	0.0826264	0.391032	0.273331	0.32915	1.12846	0.14679	0.919929	0.263654	0.413428	-0.824784	0.365913
-4.13248	-0.603424	0.317281	0.981398	0.484778	1.31329	-0.741786	0.23829	0.602691	-0.0449603	0.63002	0.104616	0.0820933	0.391417	0.273241	0.329626	1.12931	0.146755	0.920336	0.264107	0.41311	-0.825105	0.366045
-4.132	-0.60412	0.316859	0.981577	0.484941	1.31351	-0.741582	0.23858	0.602651	-0.0452054	0.630464	0.105156	0.0820953	0.391699	0.273383	0.329699	1.12967	0.146963	0.92056	0.264334	0.413033	-0.825391	0.366069
-4.13152	-0.604849	0.316416	0.981817	0.485436	1.31384	-0.741179	0.238843	0.602772	-0.0452462	0.630625	0.105781	0.0820683	0.392063	0.273625	0.329876	1.13011	0.147133	0.920832	0.264447	0.413087	-0.825755	0.366156
-4.13104	-0.605202	0.316416	0.982626	0.485267	1.3141	-0.740905	0.23961	0.602826	-0.0453391	0.630962	0.105498	0.0820408	0.392195	0.273716	0.329474	1.13081	0.147021	0.920839	0.264687	0.413193	-0.825656	0.366271
-4.13056	-0.605465	0.316202	0.983073	0.48499	1.31405	-0.741824	0.239624	0.602801	-0.0449117	0.631151	0.106098	0.082065	0.392851	0.273824	0.32974	1.13168	0.147081	0.92138	0.265191	0.41376	-0.825642	0.36617
-4.13008	-0.605228	0.316211	0.983318	0.486055	1.31458	-0.742465	0.239217	0.602939	-0.0451049	0.631173	0.106135	0.0822361	0.392995	0.274089	0.329259	1.13258	0.146888	0.921731	0.265755	0.414339	-0.825504	0.366142
-4.1296	-0.605712	0.315874	0.984169	0.486238	1.31433	-0.742487	0.239478	0.603062	-0.0447442	0.631341	0.106758	0.0828111	0.393071	0.274424	0.329794	1.13335	0.146946	0.921921	0.265957	0.414442	-0.825771	0.366659
-4.12912	-0.605914	0.315669	0.985373	0.485909	1.31513	-0.741561	0.239468	0.60296	-0.0443775	0.631271	0.107231	0.0827947	0.393882	0.274747	0.330671	1.13368	0.147084	0.922121	0.265915	0.414815	-0.825516	0.366376
-4.12864	-0.606169	0.315224	0.985921	0.485918	1.31578	-0.741144	0.239835	0.602951	-0.0441224	0.631654	0.108432	0.0832938	0.394219	0.274894	0.330828	1.13467	0.147294	0.92215	0.266618	0.415325	-0.825515	0.366412
-4.12816	-0.606124	0.314856	0.986095	0.486165	1.31618	-0.741222	0.240122	0.603128	-0.0441378	0.631678	0.108513	0.0830852	0.394493	0.275243	0.331273	1.13526	0.147407	0.92302	0.266722	0.415565	-0.824982	0.366263
-4.12768	-0.606171	0.314607	0.985905	0.486011	1.31687	-0.740936	0.240598	0.603276	-0.0437444	0.632099	0.108556	0.0834991	0.395045	0.276175	0.331858	1.13518	0.147471	0.923044	0.26691	0.415568	-0.825122	0.366406
-4.1272	-0.605812	0.314406	0.986133	0.485757	1.31734	-0.742111	0.240985	0.603412	-0.0441386	0.632189	0.108671	0.0837572	0.395226	0.276305	0.332346	1.13548	0.147657	0.923425	0.267067	0.41574	-0.824835	0.366571
-4.12672	-0.606196	0.314413	0.986636	0.484953	1.31778	-0.742705	0.241725	0.603403	-0.043512	0.631845	0.108783	0.0839399	0.395454	0.276251	0.333148	1.13595	0.147891	0.923936	0.267269	0.415784	-0.824756	0.366315
-4.12624	-0.606929	0.314734	0.987151	0.484593	1.31829	-0.742245	0.242028	0.603573	-0.0435689	0.63216	0.108874	0.0842971	0.395811	0.276725	0.333197	1.13606	0.148026	0.924268	0.267589	0.415837	-0.824451	0.366687
-4.12576	-0.607962	0.314188	0.986949	0.483947	1.31918	-0.742727	0.242683	0.60351	-0.0440103	0.631952	0.109545	0.0842454	0.396057	0.277165	0.333355	1.136	0.148251	0.925112	0.267984	0.416041	-0.823838	0.366461
-4.12528	-0.608679	0.314249	0.987315	0.484033	1.3202	-0.743138	0.24361	0.603329	-0.0440341	0.631633	0.110321	0.0838849	0.396529	0.277367	0.333715	1.13709	0.14824	0.925548	0.268328	0.415826	-0.823886	0.366924
-4.1248	-0.610047	0.314335	0.987616	0.484753	1.32095	-0.742827	0.244583	0.603009	-0.0443234	0.631217	0.110511	0.08441	0.397204	0.277483	0.334076	1.1373	0.148442	0.926035	0.268495	0.415772	-0.824334	0.366762
-4.12432	-0.611078	0.314153	0.988248	0.485094	1.32194	-0.743426	0.245435	0.603075	-0.0448481	0.631013	0.111253	0.0843631	0.397526	0.277602	0.334635	1.13774	0.14847	0.926618	0.268875	0.415854	-0.823456	0.366312
-4.12384	-0.61053	0.313941	0.987762	0.486003	1.32228	-0.744746	0.245989	0.602924	-0.0450083	0.630855	0.111565	0.0847422	0.39807	0.278281	0.334905	1.13768	0.148713	0.926982	0.268957	0.416243	-0.824014	0.366368
-4.12336	-0.610947	0.31406	0.988062	0.485678	1.32242	-0.746331	0.246365	0.603111	-0.046292	0.630611	0.111434	0.0850255	0.398368	0.278402	0.334948	1.13818	0.148949	0.92719	0.268926	0.416874	-0.824065	0.366465
-4.12288	-0.612013	0.314364	0.988883	0.485447	1.32238	-0.747466	0.246892	0.603075	-0.0457444	0.630888	0.111929	0.0848473	0.398597	0.278904	0.335051	1.13922	0.14898	0.927158	0.269191	0.4171	-0.823877	0.366216
-4.1224	-0.612294	0.313801	0.988866	0.485795	1.32317	-0.747349	0.24769	0.602988	-0.0464348	0.630654	0.111501	0.085304	0.399184	0.27896	0.335207	1.14013	0.148924	0.927187	0.269238	0.417466	-0.823768	0.366117
-4.12192	-0.613648	0.313495	0.989591	0.487505	1.32339	-0.747262	0.248563	0.602911	-0.0469818	0.630672	0.11215	0.0853914	0.399651	0.279279	0.335245	1.14115	0.14884	0.927357	0.269321	0.41752	-0.823429	0.36606
-4.12144	-0.614715	0.313246	0.989375	0.487531	1.32393	-0.747738	0.248364	0.602751	-0.0466938	0.630265	0.112505	0.0858939	0.399625	0.279183	0.335124	1.1418	0.148478	0.927615	0.269466	0.417176	-0.822913	0.365768
-4.12096	-0.61555	0.313022	0.98955	0.488044	1.32423	-0.748312	0.248879	0.602779	-0.0466671	0.63064	0.112818	0.0863718	0.399898	0.279158	0.335222	1.14172	0.148446	0.927996	0.269453	0.417736	-0.822465	0.365711
-4.12048	-0.615435	0.312692	0.990137	0.488715	1.32466	-0.7491	0.249448	0.602874	-0.0465937	0.630625	0.113794	0.0866435	0.400014	0.279461	0.335062	1.14242	0.148503	0.928515	0.269255	0.417806	-0.823058	0.365632
-4.12	-0.615923	0.312019	0.990755	0.488787	1.32533	-0.749515	0.250186	0.603062	-0.0462962	0.630839	0.114613	0.0863332	0.40035	0.279641	0.335403	1.14258	0.148737	0.928821	0.269478	0.417715	-0.823017	0.365721
-4.11952	-0.616556	0.312059	0.991024	0.48889	1.32624	-0.749404	0.250587	0.603077	-0.0464026	0.631073	0.115256	0.0857768	0.400635	0.279941	0.33558	1.14298	0.149019	0.929085	0.269566	0.417648	-0.823469	0.365668
-4.11904	-0.617533	0.311481	0.990846	0.489633	1.32646	-0.75007	0.250815	0.603226	-0.0462423	0.631762	0.116699	0.0860878	0.400671	0.280314	0.335315	1.14384	0.14928	0.929456	0.269555	0.417459	-0.823087	0.365219
-4.11856	-0.618842	0.31083	0.990106	0.489816	1.32619	-0.750843	0.25123	0.603203	-0.0467906	0.631717	0.116633	0.0861767	0.400562	0.28052	0.335288	1.14405	0.149564	0.929911	0.269512	0.417429	-0.822993	0.365068
-4.11808	-0.619642	0.310698	0.990117	0.490382	1.32714	-0.751292	0.25144	0.602991	-0.0470065	0.631642	0.116722	0.0854376	0.400404	0.2806	0.334614	1.14438	0.149773	0.930008	0.269829	0.417611	-0.822919	0.364812
-4.1176	-0.620706	0.309888	0.98989	0.490206	1.32816	-0.750638	0.251425	0.602951	-0.0473413	0.631662	0.116665	0.0848918	0.400604	0.28052	0.334876	1.14509	0.149909	0.930539	0.270235	0.417539	-0.822917	0.364318
-4.11712	-0.621558	0.309703	0.989383	0.491094	1.32881	-0.749873	0.251667	0.602932	-0.0478065	0.631871	0.116346	0.0845357	0.400333	0.281381	0.335197	1.14549	0.150103	0.930558	0.270523	0.417533	-0.822637	0.364197
-4.11664	-0.622553	0.309224	0.989712	0.49079	1.32948	-0.750804	0.251818	0.603118	-0.0479582	0.632578	0.116406	0.0847566	0.400842	0.281324	0.335769	1.14578	0.15084	0.931184	0.271062	0.417841	-0.823031	0.363923
-4.11616	-0.623021	0.308915	0.989539	0.490596	1.33087	-0.751284	0.25224	0.603401	-0.047973	0.6326	0.116323	0.0844144	0.401047	0.28155	0.33552	1.14595	0.151324	0.931994	0.271302	0.41821	-0.822834	0.364225
-4.11568	-0.623658	0.308954	0.989279	0.491447	1.33145	-0.751202	0.252258	0.603619	-0.0479508	0.633015	0.116169	0.0841548	0.401499	0.281813	0.335334	1.14688	0.151579	0.932205	0.272177	0.418689	-0.822824	0.363671
-4.1152	-0.624292	0.308642	0.989435	0.491312	1.33235	-0.75205	0.252628	0.603751	-0.0478619	0.63335	0.115667	0.0844333	0.401603	0.28202	0.334939	1.14686	0.151902	0.932254	0.272545	0.418447	-0.823174	0.364205
-4.11472	-0.624411	0.308107	0.988906	0.491877	1.33296	-0.753441	0.25265	0.603898	-0.0485486	0.633387	0.114322	0.0846206	0.401735	0.28217	0.334879	1.14779	0.152357	0.932604	0.272926	0.418355	-0.823255	0.364344
-4.11424	-0.625594	0.307823	0.988766	0.491304	1.33308	-0.753965	0.252494	0.603971	-0.0491198	0.633688	0.113973	0.0851783	0.401882	0.282604	0.334939	1.14786	0.152456	0.932856	0.27329	0.418857	-0.823658	0.364182
-4.11376	-0.626281	0.307384	0.988293	0.490822	1.33327	-0.753044	0.252875	0.604008	-0.0489885	0.633387	0.11478	0.0852517	0.402076	0.282473	0.335486	1.14835	0.152756	0.933285	0.273545	0.418752	-0.823775	0.364149
-4.11328	-0.626794	0.306641	0.988382	0.490856	1.33333	-0.753487	0.253628	0.604064	-0.0486689	0.633484	0.115393	0.084745	0.402539	0.282861	0.336141	1.1482	0.153183	0.933555	0.273526	0.419071	-0.823149	0.364464
-4.1128	-0.626284	0.305828	0.988482	0.490649	1.33373	-0.75362	0.254242	0.60412	-0.0486166	0.63355	0.115385	0.0843623	0.40301	0.283378	0.336269	1.14927	0.153406	0.933963	0.273765	0.419086	-0.82354	0.36428
-4.11232	-0.62617	0.305306	0.988604	0.490812	1.33437	-0.753614	0.254791	0.603877	-0.0482061	0.633539	0.11447	0.084363	0.403344	0.284202	0.335898	1.14951	0.153472	0.933784	0.273966	0.418913	-0.82369	0.364205
-4.11184	-0.62593	0.305404	0.988598	0.490371	1.33453	-0.752232	0.254464	0.603936	-0.0476048	0.634048	0.113119	0.0849858	0.403612	0.284597	0.33622	1.1501	0.153845	0.934124	0.274075	0.41887	-0.824027	0.364439
-4.11136	-0.625784	0.30516	0.988513	0.490724	1.33561	-0.751934	0.254738	0.604039	-0.048085	0.633434	0.11388	0.0844871	0.404064	0.284639	0.336039	1.15076	0.15406	0.93415	0.274352	0.418943	-0.824224	0.364467
-4.11088	-0.625605	0.305577	0.989139	0.49018	1.33617	-0.751849	0.255135	0.604246	-0.0484603	0.633939	0.11415	0.0842032	0.40449	0.284644	0.335906	1.15118	0.154341	0.934649	0.274792	0.419059	-0.824223	0.364548
-4.1104	-0.625608	0.305971	0.988964	0.489945	1.33684	-0.751681	0.254708	0.604453	-0.0483062	0.634189	0.115295	0.0838331	0.404644	0.284759	0.336421	1.15171	0.154526	0.934745	0.275105	0.418904	-0.824037	0.364841
-4.10992	-0.625421	0.305994	0.989417	0.489335	1.33691	-0.752047	0.254611	0.604491	-0.0478485	0.634819	0.115635	0.0832306	0.404622	0.284566	0.336364	1.15246	0.154767	0.934907	0.275212	0.419065	-0.824361	0.365195
-4.10944	-0.625286	0.305726	0.989662	0.487989	1.33752	-0.753354	0.254465	0.604398	-0.0478966	0.633938	0.115413	0.0829312	0.405607	0.284904	0.337048	1.15349	0.154993	0.934949	0.275361	0.418971	-0.823849	0.365366
-4.10896	-0.625807	0.305879	0.990065	0.487652	1.3382	-0.754359	0.254504	0.604476	-0.0473039	0.634522	0.115337	0.0827633	0.405944	0.285299	0.336895	1.15396	0.155324	0.93528	0.275389	0.418951	-0.823768	0.365456
-4.10848	-0.626336	0.305997	0.990564	0.485958	1.33846	-0.75441	0.255207	0.604581	-0.047765	0.63476	0.115732	0.0831624	0.406699	0.285321	0.33724	1.15392	0.155577	0.935687	0.275849	0.41905	-0.824208	0.36607
-4.108	-0.626913	0.306271	0.990977	0.486586	1.33885	-0.754114	0.255076	0.604492	-0.0478865	0.634821	0.116046	0.0829394	0.407175	0.285023	0.337749	1.15453	0.155745	0.936011	0.27629	0.419507	-0.823983	0.365992
-4.10752	-0.626881	0.306611	0.991223	0.486088	1.33955	-0.753661	0.254809	0.604587	-0.0476894	0.635363	0.116613	0.0827309	0.407507	0.285035	0.338554	1.1546	0.15587	0.936182	0.276425	0.419627	-0.823564	0.366423
-4.10704	-0.627784	0.30686	0.991387	0.485724	1.33943	-0.75421	0.254429	0.604694	-0.0475734	0.635666	0.117389	0.0828529	0.408416	0.284994	0.338836	1.1558	0.156083	0.936741	0.276544	0.419875	-0.824474	0.366811
-4.10656	-0.628579	0.306544	0.991412	0.485431	1.3396	-0.754631	0.254296	0.60443	-0.0483934	0.635677	0.117677	0.0828981	0.408861	0.284683	0.339093	1.15676	0.156321	0.93656	0.276841	0.419705	-0.824354	0.366661
-4.10608	-0.629179	0.306308	0.991655	0.485229	1.34063	-0.755029	0.253532	0.604432	-0.0493303	0.635648	0.118434	0.0827751	0.40914	0.284603	0.339545	1.15684	0.156445	0.936559	0.276951	0.419777	-0.824373	0.366638
-4.1056	-0.628199	0.306253	0.992137	0.48627	1.34117	-0.755117	0.253416	0.604393	-0.0500088	0.636307	0.118005	0.0830787	0.409545	0.284538	0.339902	1.15746	0.156666	0.936743	0.276976	0.419845	-0.824086	0.36647
-4.10512	-0.628588	0.306546	0.992344	0.485783	1.34163	-0.755218	0.253394	0.604458	-0.0499177	0.636061	0.118458	0.0828755	0.409751	0.28451	0.340055	1.15786	0.157296	0.936831	0.27766	0.419517	-0.824573	0.366527
-4.10464	-0.62855	0.306447	0.99256	0.484606	1.34188	-0.754381	0.252901	0.604684	-0.0499275	0.636675	0.119524	0.0826054	0.410327	0.284531	0.340404	1.158	0.157574	0.9371	0.277926	0.419439	-0.824994	0.366661
-4.10416	-0.62867	0.306755	0.993136	0.485239	1.34298	-0.754976	0.253323	0.604586	-0.0499048	0.637097	0.119672	0.0822321	0.410837	0.284569	0.340537	1.15913	0.157657	0.937625	0.278146	0.419703	-0.825003	0.366886
-4.10368	-0.628881	0.306671	0.993211	0.48529	1.34333	-0.756404	0.25332	0.604662	-0.0504612	0.636877	0.121037	0.0818371	0.411003	0.284803	0.340706	1.15972	0.157887	0.937896	0.278263	0.419878	-0.824594	0.366784
-4.1032	-0.627832	0.306953	0.993535	0.48553	1.34382	-0.757988	0.25368	0.604662	-0.0511971	0.637212	0.121516	0.0813983	0.411712	0.285055	0.341069	1.16019	0.158096	0.93839	0.278467	0.419641	-0.824528	0.367064
-4.10272	-0.627416	0.30724	0.994123	0.484581	1.34485	-0.758651	0.253775	0.604652	-0.0517924	0.637624	0.121986	0.0813778	0.412497	0.285229	0.340826	1.16055	0.158042	0.939298	0.27875	0.419365	-0.82462	0.367414
-4.10224	-0.627906	0.307035	0.994136	0.484498	1.34514	-0.758589	0.254208	0.604702	-0.052728	0.637291	0.122407	0.0819327	0.412832	0.285539	0.341184	1.16097	0.158129	0.939691	0.278852	0.419594	-0.824003	0.367373
[truncated: 18,963 more rows]

## Sheet: CA3 Ripple V_m slow
0	719301	521501	659105	580601	526202	525403	525101	521602	719001	520901	719103	521202	525404	719002	520701	525003	521502	521101	719303	719201	525301	525001	659101	521401	580201	580501	521302	520702	521303	521102	521304	719202
[truncated: 20,834 more rows]

[truncated: 10 more sheets: CA1 Ripple V_m slow, DG Ripple model slow, CA3 Ripple model slow, CA1 Ripple model slow, DG Ripple V_m fast, CA3 Ripple V_m fast, CA1 Ripple V_m fast, DG Ripple spikes, CA3 Ripple spikes, CA1 Ripple spikes]
