# Supplementary material for: UP-DOWN states and ripples differentially modulate membrane potential dynamics across DG, CA3, and CA1 in awake mice
Source: eLife. 2022 Jul 12;11:e69596. doi: 10.7554/eLife.69596 (PMC9275824; doi:10.7554/eLife.69596)
Supplement: Figure 7—figure supplement 1—source data 1. [file elife-69596-fig7-figsupp1-data1.xls]

## Sheet: DG small ripple
0	524201	524202	523701	523302	523502	523901	523301	524203	524102	523801	524002	523401	523601	523402	523501	523702	524101	524003	524001	659202	523602	659201
-499.84	0.0893076	-0.013415	0.513762	-0.176113	-0.332924	-0.372199	-0.0279119	-0.384937	0.548948	0.82322	-0.749185	1.39995	-0.0372358	0.0505952	-0.346028	0.920811	0.270864	0.201429	-0.0676647	0.495907	0.156606	0.516599
-499.36	0.112514	0.0036593	0.478799	-0.192839	-0.296005	-0.460656	-0.00911698	-0.389828	0.541827	0.782225	-0.735124	1.38608	-0.038709	0.0363986	-0.354632	0.889962	0.285826	0.190918	-0.0478566	0.509266	0.154185	0.514376
-498.88	0.167854	0.0119544	0.453788	-0.217813	-0.249102	-0.517715	-0.00832346	-0.394409	0.530779	0.76026	-0.705137	1.36515	-0.0287304	0.020559	-0.358728	0.855485	0.302975	0.178153	-0.0309983	0.522983	0.156349	0.512626
-498.4	0.247726	0.0154049	0.435671	-0.242156	-0.196273	-0.521663	-0.019943	-0.398665	0.515621	0.762624	-0.676987	1.34639	-0.0147691	0.00551507	-0.352365	0.817647	0.31879	0.163897	-0.0184329	0.539132	0.158793	0.511286
-497.92	0.328232	0.0236942	0.414823	-0.2514	-0.141763	-0.4829	-0.0327561	-0.403376	0.49991	0.780908	-0.663458	1.33172	-0.00605118	-0.010562	-0.330644	0.77535	0.331168	0.149875	-0.0099539	0.5573	0.158355	0.512253
-497.44	0.385775	0.0434056	0.388051	-0.239767	-0.0934863	-0.426993	-0.0370818	-0.408482	0.48061	0.795224	-0.663472	1.31534	-0.00473477	-0.0303452	-0.294911	0.729327	0.341816	0.138306	-0.00351565	0.57715	0.156138	0.518397
-496.96	0.41589	0.0743432	0.357459	-0.216124	-0.0576956	-0.382611	-0.0294729	-0.413573	0.465145	0.789389	-0.669579	1.28607	-0.0041024	-0.0577686	-0.254101	0.678017	0.355847	0.131211	0.00202429	0.596302	0.15109	0.531545
-496.48	0.431167	0.103671	0.332633	-0.193573	-0.0333343	-0.346424	-0.00713412	-0.416967	0.450472	0.758511	-0.675851	1.24093	0.00399264	-0.0921961	-0.223069	0.623971	0.377611	0.129689	0.00683801	0.613629	0.141557	0.55038
-496	0.454884	0.121263	0.322608	-0.183578	-0.0152322	-0.30104	0.0255662	-0.41873	0.430126	0.713204	-0.682648	1.18333	0.0224037	-0.129219	-0.212282	0.5678	0.407385	0.129681	0.00875863	0.628255	0.12338	0.572136
-495.52	0.493317	0.120029	0.32862	-0.182599	0.0030711	-0.223844	0.0613481	-0.418916	0.400978	0.66971	-0.69407	1.12352	0.0440942	-0.159463	-0.226727	0.511947	0.439038	0.127623	0.00602227	0.641131	0.0967933	0.594029
-495.04	0.54018	0.105379	0.346482	-0.177918	0.0265535	-0.123128	0.0951302	-0.418173	0.362297	0.638396	-0.711405	1.07086	0.059414	-0.178303	-0.260699	0.458597	0.465023	0.12139	-0.00266392	0.652844	0.0686319	0.615201
-494.56	0.578965	0.0873925	0.366747	-0.158684	0.0511319	-0.0201451	0.119534	-0.416932	0.318392	0.619058	-0.718941	0.860762	0.0611906	-0.184034	-0.300468	0.410692	0.480368	0.113067	-0.0154298	0.664281	0.0439638	0.633145
-494.08	0.602997	0.0763716	0.385823	-0.118933	0.0697968	0.0506722	0.134425	-0.414529	0.277397	0.603017	-0.699496	0.83252	0.0509572	-0.182161	-0.332077	0.370941	0.487375	0.106351	-0.0295596	0.675772	0.0272359	0.644751
-493.6	0.613033	0.0779576	0.401288	-0.0620852	0.0753992	0.075694	0.148824	-0.408844	0.246554	0.58563	-0.640087	0.811841	0.0380432	-0.181593	-0.348344	0.340038	0.493772	0.105331	-0.0427391	0.686636	0.0217023	0.64953
-493.12	0.617541	0.0887314	0.412958	-0.00611271	0.0684903	0.0710011	0.174878	-0.399704	0.227672	0.567099	-0.544599	0.79335	0.027863	-0.189715	-0.352811	0.314239	0.506135	0.109904	-0.0549387	0.697793	0.0259843	0.648809
-492.64	0.619311	0.102808	0.419961	0.0453199	0.0541277	0.0697519	0.221723	-0.388089	0.215956	0.553836	-0.434776	0.775863	0.0221321	-0.210724	-0.352865	0.288635	0.52642	0.115832	-0.067867	0.710297	0.0337922	0.649638
-492.16	0.614642	0.117294	0.415587	0.0876467	0.0366114	0.0997392	0.289348	-0.376658	0.206845	0.552441	-0.338803	0.756319	0.0154619	-0.238	-0.353132	0.258565	0.547777	0.118466	-0.0839213	0.725638	0.0395235	0.657569
-491.68	0.593191	0.131594	0.395015	0.128225	0.0167017	0.170937	0.361683	-0.366959	0.197788	0.56259	-0.276723	0.731472	0.0034121	-0.262853	-0.356884	0.225555	0.56289	0.115187	-0.10178	0.743162	0.0419553	0.675247
-491.2	0.545031	0.147917	0.359575	0.167174	-0.0101717	0.264469	0.419179	-0.36081	0.190458	0.577884	-0.254193	0.699572	-0.0128866	-0.279964	-0.356855	0.195267	0.566556	0.107025	-0.117929	0.759317	0.0393586	0.701309
-490.72	0.475064	0.167818	0.315137	0.194804	-0.0463304	0.347194	0.44914	-0.359105	0.187078	0.590238	-0.257347	0.655863	-0.0274143	-0.289589	-0.349475	0.17149	0.560162	0.0997299	-0.127426	0.772482	0.0330567	0.731207
-490.24	0.393291	0.192528	0.270082	0.20464	-0.0889875	0.404934	0.452745	-0.361848	0.187721	0.593646	-0.266335	0.598059	-0.0319736	-0.298699	-0.335325	0.157398	0.548965	0.0983179	-0.126882	0.780442	0.0269023	0.763923
-489.76	0.316094	0.217807	0.235595	0.189575	-0.12974	0.431514	0.44567	-0.368289	0.189048	0.591715	-0.269632	0.524744	-0.0222971	-0.316303	-0.320787	0.148009	0.537906	0.103987	-0.116969	0.787167	0.0217667	0.800489
-489.28	0.253814	0.239846	0.214568	0.160763	-0.15773	0.437008	0.445677	-0.375758	0.183618	0.590218	-0.265555	0.439918	0.000271184	-0.343811	-0.311892	0.135592	0.52746	0.113854	-0.101883	0.795694	0.0171494	0.841605
-488.8	0.211545	0.257091	0.204312	0.148304	-0.171991	0.430321	0.462581	-0.379952	0.169046	0.594361	-0.262468	0.349954	0.0335071	-0.376213	-0.309257	0.113367	0.517549	0.122991	-0.0886008	0.80921	0.0115876	0.884215
-488.32	0.190624	0.266518	0.204588	0.169606	-0.17941	0.412337	0.4954	-0.375188	0.14328	0.60684	-0.264978	0.260233	0.0726212	-0.402234	-0.307197	0.0828099	0.50781	0.12818	-0.0791952	0.824749	0.00762348	0.920718
-487.84	0.189591	0.26787	0.212118	0.222459	-0.192951	0.374594	0.532514	-0.359936	0.109236	0.627691	-0.278867	0.178875	0.115692	-0.414017	-0.295394	0.0501273	0.498187	0.129302	-0.0724593	0.837603	0.0051819	0.942549
-487.36	0.20198	0.263512	0.229338	0.281171	-0.220151	0.3148	0.559458	-0.338017	0.0741891	0.654957	-0.297187	0.11019	0.159532	-0.41007	-0.27019	0.0225185	0.490692	0.129699	-0.0655488	0.843722	0.00335329	0.947222
-486.88	0.22431	0.251129	0.252952	0.313851	-0.260244	0.237272	0.565874	-0.315706	0.0364386	0.686994	-0.314384	0.0548482	0.200738	-0.397585	-0.234072	-0.00128831	0.486188	0.133781	-0.055658	0.84251	0.00122529	0.940069
-486.4	0.251568	0.229189	0.283805	0.308235	-0.30447	0.163245	0.552681	-0.300141	0.00606553	0.717932	-0.327072	0.00856712	0.235599	-0.385582	-0.192755	-0.0251875	0.48458	0.140813	-0.0433477	0.839789	-0.00492208	0.932294
-485.92	0.282097	0.19785	0.323221	0.286226	-0.34463	0.112326	0.528276	-0.292528	-0.012449	0.742373	-0.343222	-0.0312901	0.261192	-0.380785	-0.152948	-0.0528382	0.486356	0.149561	-0.0337201	0.842891	-0.0162736	0.931692
-485.44	0.3168	0.159952	0.370278	0.283901	-0.374765	0.0986454	0.500657	-0.289061	-0.00951934	0.754828	-0.367803	-0.0676668	0.279286	-0.381802	-0.116186	-0.0861974	0.493922	0.157048	-0.0307653	0.855977	-0.0289622	0.938156
-484.96	0.360104	0.121967	0.427624	0.31707	-0.396977	0.112524	0.477288	-0.283853	0.0236619	0.754145	-0.405335	-0.0984373	0.294566	-0.380693	-0.0805319	-0.120752	0.509306	0.162274	-0.0354096	0.879726	-0.0391297	0.946175
-484.48	0.417464	0.0911341	0.491021	0.362288	-0.414613	0.119422	0.46006	-0.274108	0.0851917	0.74564	-0.454639	-0.120754	0.314454	-0.369061	-0.0446756	-0.152055	0.530839	0.169086	-0.0436598	0.907924	-0.0401195	0.947669
-484	0.485033	0.0716095	0.554282	0.381409	-0.429977	0.0888712	0.445426	-0.261608	0.16423	0.738298	-0.509767	-0.131755	0.344428	-0.342429	-0.00915728	-0.176976	0.552238	0.180707	-0.0507111	0.933519	-0.0280041	0.940237
-483.52	0.554018	0.0611668	0.607835	0.352399	-0.441392	0.0103658	0.432565	-0.250612	0.244848	0.792041	-0.560211	-0.128474	0.385904	-0.30318	0.0232873	-0.202739	0.564467	0.196655	-0.0523676	0.952002	-0.00725427	0.927603
-483.04	0.611223	0.0578071	0.644567	0.3014	-0.44566	-0.102607	0.418804	-0.244627	0.309892	0.792275	-0.601807	-0.114421	0.434658	-0.260401	0.052646	-0.237155	0.562834	0.211842	-0.0495948	0.96204	0.0182021	0.915099
-482.56	0.647488	0.0548628	0.666324	0.272918	-0.439818	-0.217634	0.405673	-0.243813	0.350388	0.789488	-0.630922	-0.0906286	0.48314	-0.222496	0.0825898	-0.286056	0.550752	0.21944	-0.0455612	0.966169	0.0434766	0.908446
-482.08	0.659968	0.0533873	0.68253	0.294991	-0.421728	-0.303963	0.392591	-0.244796	0.36453	0.778433	-0.642837	-0.0617214	0.522768	-0.196094	0.116788	-0.345686	0.539349	0.213451	-0.0419853	0.969056	0.0657928	0.910438
-481.6	0.65564	0.0519419	0.700388	0.342478	-0.393367	-0.351126	0.378378	-0.245336	0.360964	0.758481	-0.636922	-0.0284026	0.547306	-0.1807	0.155561	-0.404223	0.541112	0.196913	-0.0390413	0.975069	0.0854182	0.918286
-481.12	0.647182	0.0517381	0.726939	0.359274	-0.357889	-0.363977	0.361821	-0.24524	0.349245	0.73668	-0.619343	0.00635279	0.554958	-0.169762	0.194728	-0.449431	0.561463	0.181655	-0.0335977	0.986487	0.10136	0.931381
-480.64	0.649816	0.0559567	0.758743	0.324047	-0.321553	-0.363206	0.341525	-0.246759	0.337874	0.727278	-0.602887	0.0396052	0.549213	-0.156136	0.228123	-0.473352	0.596193	0.180352	-0.0235921	1.0026	0.116312	0.947671
-480.16	0.670949	0.0638345	0.787488	0.287433	-0.289538	-0.366107	0.320127	-0.251381	0.326089	0.736983	-0.609522	0.0687919	0.537039	-0.133517	0.252333	-0.476049	0.636707	0.199605	-0.0117097	1.01885	0.129664	0.968037
-479.68	0.704607	0.0706631	0.810454	0.351574	-0.269633	-0.38229	0.300157	-0.258509	0.308964	0.764075	-0.650998	0.0875121	0.524697	-0.103269	0.271204	-0.464882	0.673721	0.235807	-0.00330228	1.02986	0.144131	0.991189
-479.2	0.739158	0.0761207	0.828522	0.583339	-0.262707	-0.411473	0.284242	-0.265693	0.282545	0.79086	-0.720321	0.0938879	0.516095	-0.0728568	0.290677	-0.449129	0.704975	0.276298	-0.00374813	1.03313	0.161641	1.01347
-478.72	0.759137	0.0816465	0.844314	0.948607	-0.266089	-0.442332	0.269906	-0.27127	0.243132	0.79688	-0.794069	0.0867351	0.508536	-0.0521703	0.311539	-0.432707	0.731506	0.306091	-0.014646	1.02911	0.18003	1.03087
-478.24	0.76249	0.0926052	0.859933	1.31226	-0.273484	-0.464505	0.254172	-0.275854	0.201088	0.769071	-0.84347	0.0693555	0.497939	-0.0473758	0.328832	-0.418313	0.756525	0.319307	-0.0342913	1.01997	0.19716	1.03891
-477.76	0.756652	0.113221	0.872459	1.52917	-0.278288	-0.464772	0.234052	-0.280751	0.175523	0.712124	-0.851852	0.0495729	0.479739	-0.0608021	0.334226	-0.408534	0.778693	0.316297	-0.0570529	1.01015	0.210162	1.03896
-477.28	0.751184	0.145436	0.876534	1.54048	-0.277997	-0.441954	0.20841	-0.28605	0.18285	0.646165	-0.822755	0.0355786	0.454044	-0.0890017	0.327698	-0.401303	0.794557	0.305736	-0.0802342	1.00137	0.21691	1.03569
-476.8	0.754216	0.183964	0.867124	1.41069	-0.271058	-0.404021	0.181859	-0.290967	0.22683	0.593682	-0.770054	0.0313871	0.426033	-0.123501	0.315231	-0.396849	0.801022	0.294707	-0.102282	0.993967	0.21992	1.03548
-476.32	0.762353	0.219078	0.845608	1.27333	-0.260405	-0.36453	0.158249	-0.292814	0.296573	0.568847	-0.710073	0.0360391	0.401254	-0.159979	0.31012	-0.394071	0.798328	0.286362	-0.12422	0.987538	0.221791	1.0439
-475.84	0.774784	0.239377	0.82084	1.22748	-0.249602	-0.338046	0.138027	-0.292697	0.369776	0.5684	-0.651954	0.0405196	0.383152	-0.193415	0.322545	-0.390899	0.789238	0.278201	-0.146974	0.982405	0.221653	1.06108
-475.36	0.794134	0.245475	0.802462	1.27746	-0.243386	-0.33028	0.120262	-0.293106	0.423633	0.574238	-0.588474	0.0424865	0.368597	-0.220778	0.352052	-0.385765	0.778402	0.267215	-0.170721	0.97914	0.218566	1.08385
-474.88	0.834025	0.242311	0.798145	1.35386	-0.248492	-0.331668	0.103091	-0.297255	0.452356	0.566204	-0.516368	0.0397745	0.351646	-0.241568	0.393974	-0.377491	0.769001	0.254023	-0.195572	0.97991	0.20956	1.10651
-474.4	0.914593	0.241821	0.816494	1.38372	-0.270226	-0.327302	0.0838427	-0.306952	0.466936	0.534899	-0.437589	0.0407271	0.32907	-0.257852	0.437816	-0.361986	0.760802	0.242816	-0.221716	0.973104	0.195872	1.12429
-473.92	1.04549	0.250123	0.8553	1.35303	-0.308723	-0.304764	0.058867	-0.320271	0.49157	0.483673	-0.366186	0.0550009	0.301514	-0.272348	0.477467	-0.33999	0.751209	0.237937	-0.250382	0.963263	0.182543	1.13428
-473.44	1.21712	0.26564	0.910624	1.30704	-0.359029	-0.25777	0.0286742	-0.332123	0.546811	0.425058	-0.318325	0.0874274	0.275431	-0.292352	0.509947	-0.312752	0.737907	0.242432	-0.279906	0.952273	0.176965	1.13836
-472.96	1.40282	0.276364	0.970763	1.30623	-0.359579	-0.190936	-0.00842872	-0.337718	0.640365	0.372995	-0.296989	0.13387	0.259725	-0.319878	0.537078	-0.281346	0.718677	0.255069	-0.307216	0.942289	0.184641	1.13854
-472.48	1.56205	0.271523	1.02601	1.36865	-0.39917	-0.108575	-0.0494667	-0.335442	0.75665	0.335297	-0.292869	0.182397	0.259442	-0.354026	0.560556	-0.250743	0.694855	0.270689	-0.326895	0.935494	0.205075	1.13756
-472	1.6638	0.242347	1.044	1.47251	-0.420101	-0.0179672	-0.0908511	-0.326999	0.875432	0.309211	-0.289012	0.217722	0.272585	-0.388967	0.581696	-0.22669	0.670623	0.283053	-0.334982	0.931359	0.22971	1.13757
-471.52	1.70046	0.190119	1.06088	1.57334	-0.422592	0.0796917	-0.123489	-0.317129	0.973764	0.287014	-0.280055	0.233722	0.292411	-0.414872	0.603614	-0.214849	0.649806	0.289969	-0.332412	0.92757	0.251107	1.1399
-471.04	1.68717	0.123513	1.05872	1.643	-0.415084	0.176372	-0.14206	-0.31057	1.03834	0.261918	-0.270257	0.23158	0.309353	-0.426366	0.628002	-0.220905	0.634925	0.292718	-0.323905	0.920461	0.26282	1.14642
-470.56	1.65378	0.0534266	1.03863	1.67786	-0.407566	0.25617	-0.144507	-0.309003	1.06989	0.230629	-0.266894	0.22114	0.318664	-0.422662	0.656781	-0.241855	0.622741	0.295329	-0.316053	0.908519	0.265656	1.15584
-470.08	1.62285	-0.0110842	1.00266	1.69119	-0.408762	0.312708	-0.134422	-0.310037	1.07717	0.194675	-0.274189	0.209643	0.318795	-0.40932	0.688811	-0.271744	0.607406	0.301386	-0.313515	0.89245	0.266763	1.16408
-469.6	1.60559	-0.0641347	0.951618	1.68851	-0.419031	0.344216	-0.119143	-0.308459	1.07025	0.15713	-0.285959	0.195993	0.313894	-0.395395	0.722595	-0.297589	0.586094	0.310566	-0.314375	0.875601	0.27463	1.16711
-469.12	1.5976	-0.101298	0.888142	1.66443	-0.435343	0.370663	-0.103211	-0.298392	1.06325	0.1222	-0.287838	0.177326	0.307779	-0.387358	0.754803	-0.306943	0.563153	0.319446	-0.313331	0.860536	0.292062	1.16249
-468.64	1.58809	-0.121707	0.820832	1.61832	-0.451156	0.417587	-0.0885536	-0.277184	1.06501	0.0903336	-0.272756	0.153571	0.304154	-0.389204	0.783683	-0.292923	0.547635	0.322833	-0.303569	0.847696	0.317227	1.15119
-468.16	1.56917	-0.130436	0.760662	1.56272	-0.463477	0.496821	-0.0689274	-0.245871	1.0802	0.0647643	-0.248623	0.130767	0.302396	-0.400302	0.810785	-0.259824	0.548334	0.319059	-0.283153	0.835548	0.345849	1.13739
-467.68	1.53701	-0.13134	0.717144	1.51467	-0.472295	0.593614	-0.0405415	-0.210966	1.10608	0.0463689	-0.231699	0.122302	0.2992	-0.413334	0.836009	-0.219571	0.56579	0.310251	-0.256502	0.823203	0.373689	1.12464
-467.2	1.49143	-0.130886	0.69394	1.49153	-0.48244	0.674315	-0.00259837	-0.179357	1.13439	0.0378783	-0.231715	0.136293	0.290407	-0.422661	0.856346	-0.185242	0.593608	0.301203	-0.231083	0.809279	0.401627	1.11276
-466.72	1.43292	-0.136104	0.686627	1.49198	-0.496692	0.706754	0.0397459	-0.155442	1.15566	0.0412492	-0.243575	0.168219	0.272924	-0.422811	0.865488	-0.165985	0.620232	0.297491	-0.214103	0.793129	0.431101	1.09985
-466.24	1.36394	-0.148562	0.685426	1.50668	-0.516636	0.685706	0.0807591	-0.139154	1.15779	0.0522441	-0.252637	0.208182	0.248113	-0.413103	0.861818	-0.16481	0.638514	0.300793	-0.207427	0.777084	0.464505	1.08534
-465.76	1.28534	-0.16792	0.682534	1.52599	-0.539793	0.643019	0.11567	-0.125698	1.1364	0.0640665	-0.237096	0.240908	0.218554	-0.397868	0.845107	-0.173601	0.65065	0.305014	-0.204979	0.761192	0.502852	1.07164
-465.28	1.20514	-0.19181	0.679227	1.55114	-0.563235	0.620396	0.146005	-0.109812	1.09188	0.0704956	-0.187696	0.257795	0.189318	-0.384613	0.822045	-0.184749	0.663221	0.302143	-0.199395	0.74813	0.540531	1.06226
-464.8	1.13089	-0.215194	0.677405	1.59049	-0.584589	0.640442	0.176862	-0.0882939	1.03336	0.070789	-0.111159	0.261465	0.162604	-0.378516	0.799499	-0.190737	0.682774	0.286293	-0.184989	0.740667	0.574527	1.05707
-464.32	1.0668	-0.233239	0.678522	1.64849	-0.605055	0.69098	0.21134	-0.0651898	0.977512	0.0687289	-0.0267364	0.259188	0.138855	-0.378674	0.77715	-0.188795	0.710979	0.258133	-0.163256	0.74008	0.605645	1.05485
-463.84	1.0168	-0.240775	0.676992	1.72012	-0.623988	0.739388	0.246121	-0.0467802	0.935066	0.0720044	0.0447373	0.257825	0.116203	-0.382274	0.751451	-0.179226	0.743181	0.223927	-0.139891	0.745076	0.635666	1.05318
-463.36	0.978256	-0.238993	0.665885	1.7883	-0.640272	0.75018	0.275319	-0.0388866	0.914776	0.086258	0.0936175	0.262046	0.09259	-0.383431	0.72274	-0.163291	0.777769	0.193485	-0.122947	0.75006	0.664482	1.05212
-462.88	0.943702	-0.231307	0.640377	1.83448	-0.648943	0.722471	0.292134	-0.0408278	0.90915	0.109287	0.123811	0.265596	0.0681447	-0.379049	0.68987	-0.143179	0.814371	0.173209	-0.114986	0.751646	0.687771	1.05282
-462.4	0.91009	-0.228331	0.605289	1.84876	-0.647881	0.680349	0.293999	-0.0459316	0.901387	0.132999	0.147007	0.267	0.0437431	-0.368816	0.655973	-0.123695	0.854989	0.16537	-0.113108	0.748006	0.699804	1.06055
-461.92	0.877635	-0.239172	0.571029	1.83771	-0.637122	0.649558	0.284466	-0.0454082	0.87808	0.149691	0.16767	0.265261	0.0200068	-0.348832	0.626164	-0.110038	0.898837	0.167517	-0.113695	0.742408	0.699047	1.07591
-461.44	0.850257	-0.268713	0.547609	1.81262	-0.62398	0.637969	0.267324	-0.0335624	0.833118	0.155661	0.183933	0.263094	-0.000669415	-0.314965	0.602703	-0.103826	0.940489	0.17531	-0.113934	0.736952	0.69085	1.09529
-460.96	0.836717	-0.312868	0.535786	1.78676	-0.616252	0.631204	0.247694	-0.0131442	0.777324	0.15346	0.189756	0.260563	-0.0150223	-0.265628	0.586784	-0.106528	0.973815	0.18503	-0.113856	0.734387	0.68532	1.1113
-460.48	0.844059	-0.362969	0.530867	1.76411	-0.615585	0.606791	0.231318	0.00830562	0.727436	0.154275	0.179657	0.255418	-0.0221832	-0.204315	0.57557	-0.114125	0.99675	0.194973	-0.116233	0.734772	0.688838	1.11952
-460	0.871032	-0.406677	0.526374	1.74286	-0.618689	0.558343	0.218946	0.0221335	0.695227	0.169232	0.163827	0.245263	-0.0230729	-0.139935	0.568884	-0.123032	1.01336	0.201968	-0.122933	0.737545	0.696292	1.12031
-459.52	0.906729	-0.438763	0.51904	1.70894	-0.617318	0.502151	0.206078	0.0248521	0.67753	0.204468	0.156086	0.22896	-0.0231958	-0.0857525	0.564425	-0.129225	1.03306	0.20307	-0.132001	0.744731	0.696246	1.11901
-459.04	0.930582	-0.458396	0.510961	1.66012	-0.606525	0.464669	0.185702	0.0197368	0.659534	0.21648	0.17027	0.214363	-0.0324313	-0.0503439	0.558682	-0.13413	1.06294	0.195884	-0.140864	0.758949	0.675413	1.11989
-458.56	0.919241	-0.470725	0.508592	1.59762	-0.589936	0.462662	0.153521	0.012422	0.62607	0.278218	0.206474	0.211942	-0.0566668	-0.0344109	0.547323	-0.141383	1.10109	0.179411	-0.145235	0.781223	0.628438	1.12355
-458.08	0.860801	-0.47952	0.512602	1.529	-0.577304	0.491126	0.110292	0.00689981	0.574977	0.317793	0.252066	0.229028	-0.0934617	-0.0335539	0.53032	-0.153078	1.13916	0.157125	-0.142612	0.807907	0.559839	1.12556
-457.6	0.755916	-0.48601	0.517347	1.46278	-0.577507	0.526192	0.0640218	0.0032607	0.520636	0.363865	0.288883	0.264517	-0.132797	-0.0408955	0.510083	-0.169267	1.16572	0.13359	-0.134063	0.832081	0.485348	1.11991
-457.12	0.622909	-0.487533	0.516365	1.40321	-0.59165	0.542438	0.0290084	-0.00220599	0.477829	0.399429	0.304493	0.308509	-0.161892	-0.0483887	0.495105	-0.184887	1.17529	0.109378	-0.120484	0.846605	0.417185	1.10433
-456.64	0.48563	-0.482468	0.50746	1.35295	-0.611433	0.52982	0.0152618	-0.0108769	0.454086	0.431072	0.297126	0.343182	-0.178361	-0.0490568	0.4893	-0.194099	1.16835	0.0837833	-0.105691	0.84811	0.358341	1.07797
-456.16	0.364473	-0.466983	0.493941	1.30994	-0.627059	0.500743	0.0256833	-0.0223027	0.446895	0.467835	0.279498	0.359129	-0.188684	-0.0367598	0.490167	-0.191021	1.15368	0.0539295	-0.0919844	0.839972	0.307545	1.04744
-455.68	0.263086	-0.444442	0.479683	1.27769	-0.632229	0.471627	0.0536851	-0.0356164	0.445181	0.516041	0.263711	0.355488	-0.201193	-0.00741017	0.489202	-0.17358	1.13871	0.0211815	-0.0826295	0.829247	0.26008	1.01695
-455.2	0.177777	-0.419509	0.468349	1.26599	-0.631381	0.451058	0.0860243	-0.049556	0.444788	0.571793	0.256722	0.341783	-0.214636	0.0352213	0.479423	-0.142825	1.1285	-0.00686153	-0.0784381	0.815496	0.214299	0.991223
-454.72	0.10017	-0.397509	0.459439	1.28172	-0.632986	0.434436	0.112738	-0.0669018	0.444703	0.627342	0.257484	0.330147	-0.214476	0.0799666	0.459058	-0.106463	1.12258	-0.0214018	-0.0777667	0.81801	0.173428	0.970307
-454.24	0.0243158	-0.381193	0.453291	1.32633	-0.644848	0.409166	0.130215	-0.0897594	0.448373	0.673895	0.266464	0.324843	-0.184311	0.111947	0.436153	-0.0737239	1.11757	-0.0165168	-0.0783407	0.824008	0.143735	0.952718
-453.76	-0.0461072	-0.374444	0.447705	1.39381	-0.666872	0.355747	0.142828	-0.11665	0.454551	0.71037	0.276733	0.320193	-0.122032	0.123362	0.419175	-0.0539588	1.10938	-0.0148255	-0.076002	0.8288	0.124185	0.936302
-453.28	-0.109117	-0.377231	0.445695	1.46724	-0.691007	0.276678	0.156446	-0.141194	0.457428	0.740779	0.284154	0.307616	-0.0494853	0.116942	0.410486	-0.0545141	1.09715	0.0141897	-0.0675308	0.82827	0.113437	0.91988
-452.8	-0.167752	-0.387091	0.450065	1.53067	-0.70786	0.181071	0.175498	-0.156063	0.449356	0.769543	0.277944	0.281543	0.000725151	0.103082	0.403308	-0.0731224	1.08238	0.0374968	-0.0533614	0.822126	0.105293	0.903374
-452.32	-0.226327	-0.400976	0.462467	1.57624	-0.714531	0.0847428	0.19797	-0.15968	0.435878	0.798643	0.247559	0.247561	0.00502535	0.0924999	0.387649	-0.100184	1.06872	0.0500625	-0.037249	0.811529	0.0966145	0.888383
-451.84	-0.283608	-0.411392	0.478611	1.60788	-0.713241	-0.00155666	0.219981	-0.156897	0.428982	0.820723	0.187699	0.216944	-0.032816	0.0854585	0.358931	-0.122982	1.05841	0.0534589	-0.0226172	0.799289	0.087231	0.875826
-451.36	-0.33135	-0.413654	0.493953	1.63172	-0.710665	-0.0805484	0.241369	-0.155169	0.438427	0.830056	0.107661	0.202047	-0.0844551	0.0769185	0.323596	-0.133838	1.05185	0.0541414	-0.012544	0.78643	0.0790052	0.865953
-450.88	-0.355606	-0.406038	0.508898	1.65773	-0.713402	-0.167752	0.261319	-0.158741	0.465214	0.826591	0.0311645	0.209009	-0.114667	0.0629275	0.2953	-0.130739	1.0464	0.0577719	-0.00697971	0.771279	0.0731103	0.858926
-450.4	-0.350206	-0.388668	0.527257	1.68844	-0.726079	-0.270225	0.27955	-0.163553	0.497859	0.816545	-0.0195437	0.231776	-0.107561	0.0459797	0.285921	-0.120569	1.03859	0.0639369	-0.00380674	0.750743	0.0685507	0.853791
-449.92	-0.318645	-0.365408	0.555318	1.72509	-0.748563	-0.388064	0.297373	-0.163932	0.520186	0.80862	-0.0344599	0.262006	-0.0708457	0.0375925	0.299716	-0.113097	1.02823	0.0682001	-0.00146907	0.724858	0.0660842	0.853285
-449.44	-0.268765	-0.341856	0.594007	1.76264	-0.775763	-0.497394	0.310619	-0.157818	0.525212	0.804378	-0.0213418	0.290882	-0.0270265	0.0460214	0.329848	-0.112255	1.01796	0.0663249	0.00214299	0.697184	0.0633301	0.857761
-448.96	-0.215633	-0.32147	0.638804	1.80221	-0.804773	-0.576283	0.318494	-0.150374	0.519772	0.797737	-0.000736011	0.311675	0.00366223	0.0708793	0.366312	-0.113686	1.01225	0.0572846	0.00665107	0.675897	0.0575858	0.867213
-448.48	-0.165137	-0.302965	0.681266	1.84456	-0.832148	-0.61305	0.322117	-0.147796	0.518744	0.778031	0.0119918	0.327174	0.0155726	0.0991546	0.402658	-0.10935	1.01637	0.0420527	0.0105348	0.676711	0.045833	0.878449
-448	-0.109173	-0.286681	0.713342	1.89326	-0.856155	-0.612153	0.329998	-0.150555	0.534872	0.744575	0.00985781	0.340942	0.0144931	0.114729	0.435444	-0.0954946	1.03263	0.0241706	0.0122077	0.687252	0.0270553	0.886399
-447.52	-0.041481	-0.272914	0.732389	1.94633	-0.877233	-0.59528	0.349383	-0.148268	0.568045	0.709184	-0.00138988	0.355531	0.00918101	0.110714	0.465955	-0.0730975	1.05824	0.00444252	0.0104739	0.712301	-0.000545592	0.888088
-447.04	0.0410557	-0.262129	0.737068	1.99636	-0.895492	-0.577005	0.385068	-0.12799	0.602897	0.690831	-0.011982	0.369207	0.00347766	0.0881107	0.491216	-0.0498558	1.08746	-0.0180144	0.00681332	0.744509	-0.0328712	0.884664
-446.56	0.131628	-0.256605	0.726332	2.02936	-0.909557	-0.557475	0.43551	-0.0853668	0.621626	0.703389	-0.0214213	0.377828	-0.00342761	0.0580362	0.50726	-0.0321264	1.11501	-0.0434983	0.00449331	0.774605	-0.0639219	0.879965
-446.08	0.214387	-0.25459	0.702348	2.03365	-0.916856	-0.526229	0.491833	-0.0322045	0.611968	0.742996	-0.0386243	0.378166	-0.0111303	0.0314385	0.512379	-0.0183114	1.13511	-0.0721838	0.00870837	0.799113	-0.0884258	0.877646
-445.6	0.280155	-0.252481	0.667736	2.00782	-0.915893	-0.48202	0.543042	0.0087688	0.5805	0.79049	-0.079072	0.368275	-0.0173572	0.0127002	0.508081	-0.00177431	1.14364	-0.103689	0.0216676	0.817807	-0.101973	0.881034
-445.12	0.325703	-0.24553	0.62828	1.95697	-0.905731	-0.43784	0.579798	0.019466	0.543012	0.824385	-0.153374	0.349409	-0.0174869	0.00309048	0.499054	0.0245482	1.14145	-0.136955	0.0431258	0.83379	-0.108427	0.889452
-444.64	0.359715	-0.23179	0.591307	1.88856	-0.885281	-0.414538	0.598084	0.00044456	0.519534	0.83568	-0.268023	0.324333	-0.00930653	0.00235534	0.49031	0.0610353	1.13232	-0.17371	0.0678842	0.846869	-0.116101	0.902312
-444.16	0.396539	-0.213943	0.563376	1.81463	-0.857807	-0.425159	0.5995	-0.0309965	0.522384	0.830861	-0.409756	0.294703	0.00565462	0.0127307	0.482378	0.100053	1.12257	-0.215147	0.090505	0.855059	-0.128852	0.917696
-443.68	0.446305	-0.201614	0.545089	1.74016	-0.829029	-0.459867	0.591108	-0.0522525	0.555044	0.82735	-0.557545	0.263549	0.0242147	0.0367486	0.474157	0.127646	1.11841	-0.261313	0.10549	0.855622	-0.149217	0.934847
-443.2	0.511379	-0.202068	0.533072	1.66443	-0.803761	-0.493858	0.581714	-0.0507282	0.605094	0.840336	-0.679814	0.231318	0.0442906	0.0706864	0.463279	0.137319	1.12368	-0.307476	0.111925	0.847276	-0.16923	0.952899
-442.72	0.582437	-0.219768	0.522332	1.58726	-0.786133	-0.506861	0.578921	-0.0298869	0.652615	0.875944	-0.745262	0.203004	0.0657556	0.106346	0.448606	0.132109	1.13606	-0.34765	0.113824	0.835224	-0.180038	0.967408
-442.24	0.649751	-0.250343	0.504631	1.50722	-0.77794	-0.495785	0.58867	-0.00375721	0.678737	0.923873	-0.739433	0.185551	0.0887862	0.129998	0.435118	0.126259	1.15038	-0.376962	0.114069	0.825333	-0.177239	0.975419
-441.76	0.69047	-0.285119	0.475058	1.43142	-0.776738	-0.488495	0.609796	0.0149694	0.677416	0.973146	-0.671136	0.182867	0.111897	0.132491	0.441291	0.130622	1.16087	-0.394246	0.115505	0.819467	-0.166661	0.975815
-441.28	0.689841	-0.312471	0.431182	1.36641	-0.779911	-0.505248	0.634443	0.0243889	0.654297	1.01144	-0.570914	0.198035	0.132932	0.109595	0.423516	0.149102	1.1631	-0.401928	0.12103	0.817714	-0.158073	0.973656
-440.8	0.640811	-0.323555	0.372792	1.31503	-0.781724	-0.553854	0.654314	0.0303968	0.627989	1.03397	-0.475411	0.226562	0.148448	0.065816	0.396717	0.176767	1.15693	-0.404938	0.131059	0.817599	-0.160075	0.975931
-440.32	0.557522	-0.319087	0.303997	1.27205	-0.783482	-0.614992	0.664998	0.0380405	0.613049	1.03963	-0.409571	0.260235	0.158458	0.0081868	0.353409	0.199591	1.14444	-0.410046	0.147454	0.820005	-0.172733	0.986567
-439.84	0.457953	-0.303005	0.231868	1.22957	-0.785242	-0.671472	0.666918	0.047654	0.616188	1.02612	-0.369325	0.296148	0.16429	-0.0579003	0.293713	0.208992	1.12616	-0.420198	0.170781	0.827149	-0.186654	1.00608
-439.36	0.364836	-0.283599	0.163889	1.18242	-0.791235	-0.710748	0.667875	0.0541676	0.63141	0.996481	-0.334255	0.331358	0.168474	-0.131301	0.222763	0.205227	1.10063	-0.435452	0.197847	0.842665	-0.192302	1.02906
-438.88	0.290096	-0.265989	0.110111	1.13029	-0.800326	-0.739434	0.677519	0.0534981	0.650052	0.955195	-0.281244	0.370884	0.174085	-0.211903	0.152658	0.192904	1.06663	-0.452323	0.224488	0.868651	-0.184688	1.04749
-438.4	0.232847	-0.247787	0.0747733	1.0799	-0.812543	-0.768162	0.699608	0.0455236	0.662253	0.911822	-0.200772	0.417215	0.182989	-0.297125	0.0940393	0.182601	1.02244	-0.467004	0.244124	0.899489	-0.170597	1.05741
-437.92	0.178488	-0.225957	0.0606892	1.03691	-0.823041	-0.804594	0.730778	0.0341973	0.673741	0.878548	-0.108647	0.465951	0.196132	-0.379543	0.0514405	0.179331	0.971078	-0.476707	0.251316	0.928259	-0.160337	1.0608
-437.44	0.114668	-0.197447	0.0653426	1.00165	-0.830761	-0.843368	0.758103	0.0240005	0.697497	0.861782	-0.0258389	0.507298	0.211794	-0.448806	0.0206403	0.180502	0.918839	-0.479694	0.243893	0.949994	-0.158695	1.06037
-436.96	0.0390652	-0.163133	0.0832279	0.967034	-0.832822	-0.876583	0.771143	0.0153297	0.746823	0.859722	0.0250736	0.529927	0.226606	-0.502037	-0.00496213	0.181813	0.873562	-0.476872	0.223581	0.965867	-0.158227	1.05832
-436.48	-0.0317739	-0.131535	0.105763	0.9249	-0.82965	-0.90182	0.767722	0.00588882	0.81865	0.860738	0.0442818	0.526288	0.235717	-0.541384	-0.0331317	0.17847	0.840412	-0.469459	0.195054	0.979849	-0.146655	1.05465
-436	-0.0833734	-0.111992	0.125487	0.878276	-0.822608	-0.929426	0.756755	-0.00578342	0.895226	0.853123	0.0457763	0.497548	0.236106	-0.576034	-0.064142	0.16741	0.821507	-0.458157	0.163417	0.997266	-0.108217	1.04628
-435.52	-0.111036	-0.110839	0.136688	0.83357	-0.813697	-0.963834	0.74879	-0.0189927	0.950167	0.832363	0.04283	0.454569	0.229673	-0.611911	-0.0926455	0.151212	0.814236	-0.443787	0.13277	1.02117	-0.0451613	1.0325
-435.04	-0.121335	-0.127983	0.139983	0.801384	-0.806532	-1.00888	0.753821	-0.0288066	0.965857	0.80449	0.0407634	0.407674	0.222251	-0.644775	-0.111328	0.131613	0.8129	-0.428555	0.106718	1.0485	0.0287574	1.01636
-434.56	-0.13116	-0.155858	0.139656	0.789601	-0.80536	-1.05035	0.771408	-0.0315552	0.94594	0.782328	0.0350359	0.364751	0.219092	-0.66115	-0.117414	0.113265	0.812841	-0.414814	0.0866951	1.07661	0.0949293	1.0016
-434.08	-0.15771	-0.182195	0.141761	0.798309	-0.812984	-1.074	0.797469	-0.0270239	0.917862	0.774058	0.0129054	0.326353	0.220057	-0.645144	-0.114163	0.0987023	0.810362	-0.406003	0.0720417	1.10321	0.141499	0.990557
-433.6	-0.194073	-0.201853	0.144615	0.818369	-0.830823	-1.07219	0.826623	-0.0198783	0.914459	0.776537	-0.0315692	0.287922	0.220612	-0.592823	-0.110103	0.0891111	0.805461	-0.404542	0.0600462	1.12708	0.16931	0.983109
-433.12	-0.225052	-0.217226	0.143833	0.842237	-0.857715	-1.05038	0.854133	-0.0171018	0.952657	0.780502	-0.0936316	0.246088	0.215545	-0.514712	-0.114876	0.0872407	0.798297	-0.40961	0.0502001	1.14832	0.182614	0.974784
-432.64	-0.23365	-0.236985	0.134506	0.869899	-0.887548	-1.01921	0.882045	-0.0238441	1.02067	0.772383	-0.162767	0.202274	0.205779	-0.433295	-0.130107	0.0926285	0.789727	-0.418788	0.0405326	1.1654	0.189381	0.964665
-432.16	-0.215972	-0.261611	0.113336	0.907285	-0.914604	-0.989102	0.912373	-0.0384044	1.08916	0.749789	-0.226429	0.164169	0.198298	-0.370425	-0.154653	0.101816	0.77865	-0.428891	0.0321758	1.17666	0.188292	0.953042
-431.68	-0.188083	-0.288114	0.0905356	0.9566	-0.935406	-0.964649	0.944935	-0.0547102	1.12695	0.71631	-0.277432	0.14157	0.202218	-0.336709	-0.186162	0.115609	0.762017	-0.438185	0.0288522	1.18083	0.17718	0.943088
-431.2	-0.162659	-0.307538	0.0747785	1.01479	-0.948781	-0.945766	0.977685	-0.0659115	1.12441	0.687209	-0.317953	0.141286	0.220706	-0.32971	-0.222126	0.131538	0.739494	-0.446629	0.0307435	1.179	0.156199	0.936885
-430.72	-0.158627	-0.311391	0.0786642	1.07416	-0.954338	-0.932993	1.01043	-0.0682437	1.10204	0.672975	-0.354576	0.16332	0.246718	-0.335651	-0.266614	0.149866	0.711766	-0.453753	0.0374129	1.17467	0.128281	0.933251
-430.24	-0.175064	-0.299739	0.102427	1.12	-0.950779	-0.929827	1.04241	-0.0635975	1.09997	0.67745	-0.395634	0.201993	0.266312	-0.341376	-0.321632	0.167107	0.682141	-0.457363	0.0438405	1.17116	0.100539	0.928858
-429.76	-0.196183	-0.282095	0.140565	1.14548	-0.937637	-0.941706	1.07723	-0.058158	1.14005	0.694248	-0.443845	0.247931	0.269372	-0.336927	-0.386633	0.179754	0.653948	-0.456029	0.0452618	1.17196	0.0759756	0.920448
-429.28	-0.196406	-0.273464	0.18306	1.151	-0.914708	-0.967109	1.11435	-0.0569663	1.22148	0.708988	-0.50121	0.29639	0.255805	-0.320598	-0.459854	0.183605	0.630214	-0.449138	0.0500016	1.17796	0.054684	0.909766
-428.8	-0.153956	-0.275154	0.223223	1.14334	-0.884588	-0.996532	1.15191	-0.060902	1.31944	0.709666	-0.56307	0.345705	0.235055	-0.293498	-0.53488	0.180592	0.614433	-0.439346	0.0399935	1.18622	0.0368514	0.90016
-428.32	-0.0663283	-0.278453	0.258792	1.14419	-0.854477	-1.01339	1.18466	-0.0665177	1.40253	0.693787	-0.624649	0.396732	0.221023	-0.259589	-0.607028	0.175004	0.609501	-0.432303	0.0305785	1.19421	0.0239008	0.893458
-427.84	0.0574642	-0.267467	0.293934	1.16351	-0.829847	-1.00289	1.20933	-0.0712461	1.45681	0.667893	-0.682914	0.448104	0.222353	-0.221694	-0.673106	0.171292	0.615553	-0.43431	0.026886	1.19913	0.0204248	0.889642
-427.36	0.192454	-0.23132	0.334034	1.20503	-0.814081	-0.959408	1.21862	-0.0747742	1.48853	0.64294	-0.738754	0.493428	0.238328	-0.182914	-0.7339	0.170932	0.630201	-0.447284	0.0303195	1.1983	0.0301283	0.885305
-426.88	0.308909	-0.171114	0.382091	1.25883	-0.807888	-0.894683	1.21499	-0.081014	1.51868	0.625955	-0.796429	0.519709	0.262029	-0.147576	-0.789271	0.1695	0.648843	-0.467464	0.0392581	1.1914	0.0500994	0.87592
-426.4	0.385726	-0.098562	0.435277	1.29614	-0.808435	-0.828497	1.19903	-0.0936046	1.55694	0.617343	-0.85693	0.518369	0.284017	-0.122894	-0.840404	0.16226	0.666673	-0.488745	0.0495911	1.17899	0.0739383	0.861967
-425.92	0.421233	-0.031923	0.485705	1.29993	-0.810955	-0.779485	1.17502	-0.111941	1.59477	0.608087	-0.91713	0.487718	0.300619	-0.114838	-0.884405	0.149533	0.680272	-0.503616	0.0578907	1.16235	0.0920697	0.845482
-425.44	0.433794	0.0235666	0.526541	1.26775	-0.810009	-0.752473	1.14584	-0.129584	1.6145	0.588344	-0.968616	0.435103	0.311877	-0.125985	-0.919366	0.139427	0.691887	-0.506919	0.0603122	1.14367	0.0996311	0.828924
-424.96	0.447456	0.0729136	0.552393	1.21944	-0.802966	-0.737191	1.11383	-0.139083	1.60443	0.551968	-1.00368	0.371327	0.318534	-0.151326	-0.943132	0.144485	0.705469	-0.497983	0.0546748	1.12466	0.098984	0.813418
-424.48	0.479241	0.127464	0.566623	1.18285	-0.78849	-0.712257	1.08177	-0.13642	1.56329	0.50304	-1.01489	0.308762	0.32168	-0.180392	-0.954285	0.174933	0.724457	-0.480173	0.0400575	1.10544	0.0999321	0.799837
-424	0.531879	0.194582	0.574126	1.17291	-0.767766	-0.661813	1.04952	-0.123293	1.51065	0.452243	-1.0054	0.252213	0.320643	-0.201829	-0.956273	0.229697	0.747928	-0.461319	0.0174084	1.08718	0.109997	0.788714
-423.52	0.591835	0.267841	0.580679	1.1903	-0.74392	-0.58563	1.01883	-0.105115	1.46379	0.412262	-0.979221	0.201252	0.314472	-0.206136	-0.953277	0.295642	0.772342	-0.44964	-0.0104094	1.06984	0.13272	0.784154
-423.04	0.647484	0.33492	0.587757	1.212	-0.72273	-0.503074	0.992188	-0.0867339	1.42895	0.391555	-0.948128	0.151971	0.306535	-0.192784	-0.946095	0.35712	0.794285	-0.45126	-0.0388821	1.05384	0.162939	0.788846
-422.56	0.69889	0.385965	0.590863	1.22101	-0.710089	-0.442382	0.973362	-0.0724157	1.39757	0.389533	-0.923405	0.107262	0.300304	-0.167505	-0.936297	0.402816	0.814117	-0.464939	-0.0641264	1.04143	0.192448	0.803342
-422.08	0.751771	0.422759	0.583052	1.2079	-0.71075	-0.428861	0.963332	-0.0613934	1.35742	0.399123	-0.917487	0.0720907	0.297561	-0.137935	-0.920766	0.434866	0.835624	-0.483776	-0.0832751	1.03349	0.215281	0.825188
-421.6	0.819364	0.454404	0.562091	1.18295	-0.723761	-0.474409	0.961271	-0.0526745	1.30036	0.41085	-0.933962	0.0494183	0.29897	-0.111507	-0.897565	0.461219	0.864316	-0.498032	-0.0960334	1.02977	0.229128	0.847925
-421.12	0.898314	0.489155	0.532447	1.15905	-0.741689	-0.571881	0.961708	-0.0459858	1.23272	0.417619	-0.966212	0.0392339	0.300275	-0.0918241	-0.868842	0.492199	0.903741	-0.498657	-0.104127	1.02965	0.238722	0.866177
-420.64	0.96983	0.525707	0.505532	1.1453	-0.758542	-0.70261	0.95812	-0.0412394	1.16521	0.413269	-1.00108	0.0341755	0.298303	-0.0816729	-0.844009	0.5288	0.950822	-0.486432	-0.109793	1.0304	0.2507	0.876453
-420.16	1.01126	0.554039	0.492486	1.13565	-0.770533	-0.844817	0.946862	-0.040272	1.10635	0.397095	-1.01787	0.0267165	0.290769	-0.0843536	-0.831666	0.561718	0.999843	-0.467048	-0.115939	1.02796	0.270244	0.878159
-419.68	1.00857	0.567839	0.495367	1.11635	-0.780497	-0.974892	0.932001	-0.0423782	1.05611	0.372836	-1.00602	0.0158014	0.278157	-0.103406	-0.837773	0.584904	1.04107	-0.449764	-0.126312	1.01966	0.297961	0.870862
-419.2	0.967685	0.566963	0.508766	1.07737	-0.792348	-1.07976	0.916729	-0.0465394	1.01151	0.347652	-0.969428	0.00649894	0.263042	-0.142438	-0.86096	0.590932	1.06784	-0.441313	-0.142612	1.00569	0.329519	0.854494
-418.72	0.903693	0.568636	0.522848	1.01804	-0.805238	-1.14939	0.902796	-0.0505916	0.976163	0.332074	-0.925901	0.0127488	0.247585	-0.197448	-0.895682	0.585143	1.07524	-0.440977	-0.164177	0.989601	0.364205	0.8293
-418.24	0.838424	0.588463	0.528244	0.94712	-0.814657	-1.17931	0.887947	-0.0518235	0.956262	0.333548	-0.893927	0.0438594	0.233548	-0.258063	-0.932898	0.573716	1.06401	-0.443112	-0.186062	0.976957	0.401014	0.799407
-417.76	0.78236	0.630786	0.520411	0.877117	-0.811307	-1.16824	0.868695	-0.0476228	0.964427	0.352252	-0.885704	0.0958811	0.223099	-0.31244	-0.968378	0.565301	1.03901	-0.442397	-0.20483	0.971079	0.439823	0.772833
-417.28	0.724953	0.682237	0.49961	0.813641	-0.791258	-1.13037	0.844229	-0.0371324	1.00841	0.381724	-0.888403	0.151354	0.218773	-0.351499	-0.998215	0.564772	1.0064	-0.437962	-0.21628	0.973688	0.481709	0.758685
-416.8	0.648034	0.720008	0.467037	0.759237	-0.757973	-1.0762	0.818049	-0.0205789	1.0858	0.407192	-0.885367	0.186371	0.222555	-0.372499	-1.01878	0.57218	0.97364	-0.432741	-0.220883	0.983294	0.523398	0.761241
-416.32	0.543593	0.725278	0.427392	0.714872	-0.720706	-1.0184	0.798053	0.000130195	1.18482	0.416086	-0.861102	0.186789	0.237207	-0.380316	-1.02732	0.584048	0.946616	-0.430758	-0.222111	0.996083	0.559225	0.774976
-415.84	0.416216	0.695592	0.380062	0.680702	-0.692128	-0.96791	0.789974	0.0236189	1.29283	0.401216	-0.818871	0.150391	0.264015	-0.383529	-1.02538	0.59444	0.928475	-0.432432	-0.226095	1.00722	0.585625	0.789341
-415.36	0.28067	0.646405	0.329	0.661275	-0.678721	-0.93236	0.790211	0.0460778	1.3989	0.366851	-0.779646	0.0956715	0.300809	-0.391172	-1.01753	0.599012	0.920458	-0.436865	-0.235007	1.01495	0.601939	0.795024
-414.88	0.153968	0.599392	0.276308	0.656556	-0.676422	-0.917162	0.789903	0.0638625	1.49891	0.323417	-0.761054	0.0445578	0.341295	-0.407934	-1.01105	0.595982	0.921131	-0.442121	-0.248654	1.01942	0.611185	0.78907
-414.4	0.0435997	0.568077	0.223554	0.664022	-0.67898	-0.925549	0.78394	0.073331	1.59212	0.281325	-0.771253	0.0154742	0.375056	-0.43733	-1.00656	0.584332	0.927278	-0.449479	-0.262361	1.02118	0.619338	0.776409
-413.92	-0.0555316	0.551912	0.172606	0.679904	-0.677123	-0.956153	0.763656	0.0727417	1.6753	0.218672	-0.797686	0.0110009	0.393484	-0.477046	-0.997459	0.564163	0.934425	-0.459447	-0.272361	1.02403	0.63321	0.765104
-413.44	-0.149599	0.540973	0.124392	0.699368	-0.667834	-0.99309	0.731512	0.0649182	1.74476	0.191514	-0.827413	0.0192274	0.394316	-0.523557	-0.971797	0.53852	0.93601	-0.472263	-0.275789	1.03169	0.658381	0.76159
-412.96	-0.241241	0.524214	0.0740063	0.723208	-0.649812	-1.01319	0.691056	0.056752	1.79264	0.171738	-0.851472	0.0212486	0.382341	-0.570647	-0.922522	0.509778	0.929038	-0.484514	-0.273384	1.04423	0.698076	0.760982
-412.48	-0.318583	0.494556	0.0217901	0.750439	-0.625277	-0.994966	0.647669	0.0541623	1.81426	0.16018	-0.873511	0.00301224	0.364978	-0.611064	-0.854869	0.479935	0.912406	-0.491875	-0.267234	1.0617	0.7508	0.756319
-412	-0.369889	0.454743	-0.0325582	0.776854	-0.596702	-0.92889	0.601453	0.0634293	1.80302	0.159547	-0.89805	-0.0366544	0.349829	-0.640603	-0.78862	0.451811	0.889793	-0.489548	-0.260817	1.07984	0.810091	0.742232
-411.52	-0.387233	0.408172	-0.0842505	0.794872	-0.568441	-0.827068	0.560137	0.0826869	1.76058	0.172008	-0.925738	-0.0929093	0.338571	-0.65942	-0.743209	0.424938	0.866359	-0.478968	-0.254086	1.09478	0.866244	0.719028
-411.04	-0.379573	0.355963	-0.127536	0.794471	-0.547007	-0.714176	0.528294	0.107903	1.69013	0.195224	-0.944965	-0.153607	0.328635	-0.669131	-0.731225	0.397247	0.846045	-0.46499	-0.247995	1.10303	0.910955	0.693822
-410.56	-0.366843	0.302744	-0.158416	0.768589	-0.539177	-0.611675	0.493153	0.132192	1.59939	0.216568	-0.939117	-0.210663	0.318044	-0.669997	-0.746052	0.365759	0.828848	-0.453166	-0.243265	1.10481	0.94283	0.672644
-410.08	-0.370932	0.253563	-0.176381	0.72256	-0.546636	-0.534129	0.494611	0.15341	1.50313	0.222635	-0.901122	-0.258268	0.311686	-0.660044	-0.771385	0.330086	0.812979	-0.446012	-0.243352	1.10486	0.966245	0.6592
-409.6	-0.400052	0.215482	-0.183697	0.672923	-0.566424	-0.476337	0.515885	0.170907	1.42043	0.205829	-0.841851	-0.293243	0.31731	-0.635229	-0.792452	0.291744	0.796533	-0.441988	-0.250116	1.10819	0.990187	0.652374
-409.12	-0.4534	0.192584	-0.184916	0.631781	-0.589868	-0.428692	0.549419	0.186278	1.35723	0.169465	-0.786553	-0.313876	0.340193	-0.595186	-0.808038	0.257765	0.780399	-0.436818	-0.263845	1.11987	1.01765	0.648897
-408.64	-0.514425	0.186345	-0.187556	0.604505	-0.610979	-0.387855	0.581664	0.19926	1.30817	0.128528	-0.75583	-0.320288	0.37581	-0.543458	-0.822584	0.237018	0.76746	-0.42637	-0.282447	1.14154	1.04673	0.645015
-408.16	-0.571373	0.192966	-0.1938	0.585137	-0.620341	-0.355612	0.602226	0.207624	1.2536	0.0969006	-0.750795	-0.315051	0.412715	-0.49005	-0.844139	0.23544	0.761446	-0.410541	-0.301522	1.16968	1.06907	0.638721
-407.68	-0.617245	0.205817	-0.201916	0.560027	-0.616873	-0.340124	0.613501	0.208966	1.17032	0.0843737	-0.757623	-0.30267	0.438317	-0.443131	-0.871084	0.251656	0.763548	-0.39277	-0.317308	1.20032	1.07761	0.630949
-407.2	-0.648188	0.219877	-0.2121	0.523419	-0.602898	-0.341019	0.622845	0.204412	1.0502	0.0862503	-0.757672	-0.290522	0.445789	-0.406092	-0.893557	0.278239	0.770668	-0.372644	-0.326483	1.23043	1.07737	0.621649
-406.72	-0.661455	0.235853	-0.223164	0.474967	-0.578782	-0.353295	0.639544	0.198822	0.904788	0.090328	-0.747931	-0.285833	0.439492	-0.375159	-0.899889	0.307734	0.78053	-0.367962	-0.327476	1.26002	1.08377	0.610963
-406.24	-0.651089	0.254594	-0.240783	0.425898	-0.544076	-0.365914	0.665875	0.198206	0.762636	0.0844652	-0.745902	-0.293168	0.427675	-0.344149	-0.888919	0.333378	0.790914	-0.371817	-0.323295	1.2915	1.11118	0.600091
-405.76	-0.612138	0.274869	-0.265448	0.390628	-0.500274	-0.375618	0.692791	0.205319	0.647268	0.0664782	-0.773764	-0.312932	0.413962	-0.31066	-0.86917	0.353811	0.799397	-0.380466	-0.318279	1.32658	1.168	0.590722
-405.28	-0.545912	0.292147	-0.292616	0.373123	-0.455673	-0.382958	0.706863	0.216938	0.56224	0.0443244	-0.841648	-0.345308	0.397209	-0.276833	-0.852036	0.37073	0.803732	-0.388763	-0.319516	1.36479	1.24802	0.58193
-404.8	-0.465219	0.301176	-0.309932	0.373621	-0.417317	-0.388304	0.701086	0.228019	0.496431	0.0244041	-0.93003	-0.386775	0.371804	-0.244433	-0.842973	0.384089	0.801627	-0.393295	-0.330918	1.40068	1.33695	0.572346
-404.32	-0.391107	0.294843	-0.303864	0.390353	-0.393452	-0.386991	0.679155	0.233795	0.424706	0.00787902	-1.00014	-0.436896	0.337959	-0.216272	-0.836376	0.393869	0.791538	-0.393442	-0.352072	1.42779	1.4157	0.559895
-403.84	-0.33818	0.271089	-0.269809	0.421332	-0.384819	-0.37106	0.656651	0.234146	0.33911	-0.0140635	-1.0175	-0.491135	0.304027	-0.191411	-0.822114	0.398445	0.77508	-0.390081	-0.377141	1.44142	1.47976	0.546169
-403.36	-0.309273	0.228659	-0.212989	0.463515	-0.38526	-0.339275	0.646492	0.229955	0.248734	-0.049267	-0.980814	-0.548343	0.278731	-0.166539	-0.792624	0.39443	0.756571	-0.384678	-0.395689	1.44281	1.53058	0.534105
-402.88	-0.295205	0.171094	-0.147085	0.517717	-0.384734	-0.300257	0.654956	0.224298	0.168564	-0.101254	-0.91386	-0.606219	0.266886	-0.143352	-0.750898	0.383644	0.742709	-0.37811	-0.400595	1.4357	1.57639	0.528298
-402.4	-0.282406	0.103343	-0.0901065	0.576982	-0.37997	-0.275369	0.67557	0.218696	0.113697	-0.158953	-0.855143	-0.664428	0.264193	-0.124726	-0.706035	0.367335	0.738254	-0.371873	-0.389789	1.42539	1.6259	0.528844
-401.92	-0.259997	0.0306817	-0.0503277	0.630225	-0.372525	-0.283201	0.698758	0.21477	0.0835242	-0.205888	-0.821183	-0.718293	0.26072	-0.114041	-0.666121	0.342659	0.743611	-0.365725	-0.368165	1.41452	1.68028	0.531786
-401.44	-0.225178	-0.0383945	-0.0245428	0.669957	-0.373015	-0.325246	0.718497	0.21508	0.0693179	-0.231759	-0.800797	-0.761802	0.248892	-0.108667	-0.634191	0.30943	0.754343	-0.358629	-0.345158	1.40368	1.73708	0.532067
-400.96	-0.176271	-0.101606	-0.00381213	0.697988	-0.390328	-0.383368	0.733377	0.223165	0.0567365	-0.239089	-0.762279	-0.782726	0.232855	-0.101178	-0.605867	0.270301	0.764059	-0.350531	-0.326609	1.39392	1.79369	0.525363
-400.48	-0.112423	-0.157064	0.0204505	0.719015	-0.422414	-0.439325	0.748433	0.2403	0.0525125	-0.240323	-0.6862	-0.773599	0.222063	-0.0828357	-0.580633	0.23149	0.769565	-0.340157	-0.311705	1.38502	1.85111	0.513591
-400	-0.0325081	-0.207379	0.0489066	0.738338	-0.459864	-0.486423	0.763953	0.263732	0.0636059	-0.248433	-0.578782	-0.735273	0.22444	-0.0526932	-0.562134	0.202554	0.769539	-0.327273	-0.294095	1.37812	1.90957	0.503866
-399.52	0.0628883	-0.256511	0.0786787	0.759057	-0.487736	-0.536601	0.780865	0.286463	0.0984161	-0.267323	-0.468903	-0.67933	0.240278	-0.0202275	-0.558932	0.189789	0.765366	-0.313831	-0.266735	1.37171	1.96824	0.502361
-399.04	0.166047	-0.303631	0.105065	0.775031	-0.49537	-0.601309	0.794934	0.303155	0.153002	-0.288028	-0.389536	-0.620955	0.262332	-0.00125267	-0.577451	0.196216	0.759982	-0.304545	-0.227026	1.36346	2.02169	0.512986
-398.56	0.263411	-0.3508	0.132916	0.783576	-0.485483	-0.684698	0.804978	0.312479	0.216064	-0.294645	-0.35077	-0.574484	0.280263	-0.00846436	-0.615501	0.213754	0.754925	-0.303098	-0.178718	1.34781	2.06395	0.532966
-398.08	0.346597	-0.391607	0.167114	0.790087	-0.468309	-0.769248	0.809594	0.317708	0.271563	-0.281261	-0.339744	-0.540697	0.287932	-0.045083	-0.663571	0.23695	0.748663	-0.311582	-0.128851	1.32748	2.09048	0.558159
-397.6	0.413978	-0.421016	0.211872	0.801798	-0.454923	-0.82756	0.808085	0.32491	0.314243	-0.252571	-0.330334	-0.509803	0.287612	-0.102336	-0.706649	0.260269	0.738588	-0.326607	-0.0835677	1.30802	2.09728	0.581094
-397.12	0.470998	-0.439348	0.262671	0.826289	-0.453496	-0.837278	0.796656	0.336287	0.349253	-0.223876	-0.302393	-0.472241	0.28505	-0.163988	-0.73506	0.283552	0.722077	-0.341245	-0.0454439	1.29672	2.08829	0.595197
-396.64	0.526447	-0.44677	0.300546	0.857046	-0.464446	-0.801517	0.773149	0.349499	0.382667	-0.207504	-0.257888	-0.42464	0.286545	-0.214127	-0.745918	0.312456	0.698452	-0.34888	-0.0152837	1.29623	2.06536	0.598436
-396.16	0.580533	-0.445042	0.32017	0.882056	-0.481978	-0.738788	0.735108	0.359638	0.41796	-0.206471	-0.211081	-0.373709	0.294097	-0.246061	-0.74288	0.353707	0.670676	-0.346343	0.00772075	1.30138	2.03244	0.589753
-395.68	0.623677	-0.436671	0.316732	0.890204	-0.50166	-0.675033	0.683519	0.363853	0.450229	-0.215094	-0.183543	-0.33121	0.305635	-0.261343	-0.733575	0.40734	0.642714	-0.336776	0.0239879	1.30276	1.99135	0.573414
-395.2	0.643627	-0.42565	0.290702	0.883675	-0.522034	-0.623903	0.625455	0.36351	0.474825	-0.221906	-0.189352	-0.298668	0.314013	-0.267215	-0.724818	0.46925	0.620397	-0.325142	0.0340002	1.29378	1.94566	0.554483
-394.72	0.633098	-0.413921	0.248421	0.880666	-0.542296	-0.588992	0.569592	0.36298	0.489969	-0.223369	-0.227392	-0.269739	0.313864	-0.272612	-0.71911	0.529797	0.606991	-0.315981	0.0391548	1.27514	1.90138	0.542243
-394.24	0.596979	-0.402603	0.197047	0.90233	-0.561514	-0.562513	0.525469	0.36346	0.498889	-0.222819	-0.291639	-0.237212	0.300458	-0.285079	-0.718164	0.581699	0.600396	-0.310288	0.0437951	1.254	1.86619	0.541565
-393.76	0.544909	-0.391248	0.142699	0.964727	-0.579227	-0.538476	0.497984	0.363883	0.507849	-0.231612	-0.369179	-0.199005	0.274486	-0.304722	-0.722993	0.621016	0.595904	-0.306948	0.0506414	1.23875	1.84505	0.553077
-393.28	0.484146	-0.377463	0.0930798	1.05571	-0.595935	-0.519357	0.487719	0.361592	0.512259	-0.25938	-0.449758	-0.166788	0.240599	-0.326808	-0.735636	0.647819	0.589394	-0.303573	0.0604467	1.23151	1.83795	0.5704
-392.8	0.414637	-0.360599	0.0530424	1.1514	-0.612692	-0.508445	0.49016	0.355405	0.504817	-0.305407	-0.518884	-0.157385	0.208317	-0.343191	-0.757003	0.662649	0.578463	-0.301027	0.0710438	1.22723	1.83898	0.586534
-392.32	0.332538	-0.34454	0.0247445	1.22314	-0.631068	-0.508934	0.502246	0.347361	0.475871	-0.355531	-0.566025	-0.178059	0.186081	-0.350683	-0.785602	0.670169	0.565619	-0.301962	0.0790265	1.21994	1.84082	0.594072
-391.84	0.238036	-0.337385	0.00699403	1.25405	-0.648594	-0.516357	0.516506	0.341038	0.428294	-0.392044	-0.590881	-0.218766	0.178746	-0.349261	-0.81721	0.672019	0.55472	-0.308646	0.0833412	1.20468	1.83486	0.593163
-391.36	0.140738	-0.34764	-0.00604143	1.24937	-0.660718	-0.524848	0.534473	0.338246	0.371337	-0.401625	-0.604614	-0.256254	0.182886	-0.345785	-0.846049	0.668748	0.549826	-0.34448	0.0852178	1.18383	1.82255	0.587128
-390.88	0.0554462	-0.374375	-0.0191174	1.22676	-0.662675	-0.52832	0.55697	0.338035	0.318597	-0.383106	-0.627851	-0.268047	0.193675	-0.345648	-0.866902	0.66416	0.549754	-0.358083	0.0872967	1.16272	1.80696	0.580205
-390.4	-0.00537858	-0.411881	-0.0315549	1.20551	-0.653034	-0.521542	0.586431	0.33779	0.27462	-0.348908	-0.67293	-0.246242	0.203584	-0.350965	-0.87949	0.660034	0.550003	-0.365063	0.0921589	1.14658	1.798	0.57504
-389.92	-0.0368933	-0.446789	-0.0405573	1.19542	-0.636578	-0.508591	0.622642	0.336881	0.239863	-0.313019	-0.742061	-0.202876	0.207419	-0.358314	-0.886729	0.657315	0.544621	-0.360315	0.0992802	1.13586	1.79738	0.572838
-389.44	-0.0507369	-0.467533	-0.0410963	1.1952	-0.622725	-0.498955	0.659756	0.335976	0.211738	-0.287172	-0.82186	-0.155199	0.204637	-0.361832	-0.891983	0.652819	0.53183	-0.345518	0.10651	1.12648	1.80224	0.573952
-388.96	-0.0659381	-0.475075	-0.0310087	1.195	-0.617283	-0.49967	0.692364	0.336132	0.186304	-0.270215	-0.884407	-0.118975	0.194304	-0.358712	-0.89997	0.644255	0.513524	-0.326015	0.114137	1.11495	1.80679	0.577829
-388.48	-0.0961987	-0.473428	-0.0119916	1.18829	-0.62176	-0.51514	0.719796	0.336879	0.161507	-0.255463	-0.911108	-0.091605	0.176107	-0.352254	-0.910423	0.626157	0.495707	-0.308645	0.121489	1.09947	1.8015	0.586417
-388	-0.147448	-0.473335	0.0105389	1.17023	-0.631729	-0.537691	0.745384	0.334235	0.137351	-0.233814	-0.891394	-0.0646398	0.149614	-0.349977	-0.920334	0.598561	0.485987	-0.298767	0.130406	1.08232	1.78416	0.599681
-387.52	-0.215926	-0.476693	0.0317017	1.14266	-0.641226	-0.557389	0.776757	0.326104	0.111682	-0.205649	-0.834617	-0.0309393	0.117274	-0.355312	-0.925259	0.565565	0.488255	-0.296186	0.140039	1.06742	1.76282	0.615566
-387.04	-0.292678	-0.482655	0.0482779	1.10827	-0.644041	-0.563611	0.816235	0.313071	0.0828573	-0.177263	-0.761677	0.00758475	0.0830757	-0.368567	-0.925066	0.535908	0.502266	-0.298406	0.150276	1.0582	1.74813	0.633001
-386.56	-0.368413	-0.487727	0.0554462	1.07068	-0.639836	-0.55673	0.861163	0.30054	0.0516105	-0.162558	-0.698043	0.0391137	0.0511025	-0.386394	-0.921069	0.516365	0.525045	-0.301164	0.159229	1.05557	1.74944	0.648755
-386.08	-0.444481	-0.48812	0.0499504	1.0303	-0.628925	-0.542198	0.905146	0.294876	0.024162	-0.165982	-0.659975	0.0532868	0.024633	-0.404498	-0.913983	0.511955	0.551141	-0.302292	0.165362	1.05727	1.76508	0.66203
-385.6	-0.524161	-0.487303	0.0299623	0.991387	-0.612243	-0.532682	0.938498	0.29653	0.00671388	-0.185501	-0.652258	0.0482497	1.5475e-05	-0.420141	-0.902885	0.518949	0.573435	-0.30245	0.170464	1.05893	1.78738	0.673666
-385.12	-0.610012	-0.485736	-0.00507399	0.954747	-0.591345	-0.527469	0.958254	0.300482	-0.000389875	-0.212565	-0.672494	0.030095	-0.0247986	-0.43245	-0.887647	0.533101	0.587729	-0.30568	0.17679	1.05501	1.80256	0.687121
-384.64	-0.694258	-0.483691	-0.0529312	0.921018	-0.567586	-0.511009	0.967589	0.297578	-0.00541569	-0.237221	-0.711217	0.00939436	-0.0518909	-0.439679	-0.869915	0.541447	0.593148	-0.316375	0.18705	1.04022	1.79957	0.705132
-384.16	-0.764248	-0.473304	-0.10728	0.881974	-0.540596	-0.462225	0.969491	0.281233	-0.0272419	-0.252497	-0.757345	-0.00789564	-0.0776068	-0.43547	-0.854708	0.536524	0.590146	-0.335679	0.202762	1.01366	1.78291	0.730737
-383.68	-0.809232	-0.452547	-0.163427	0.832315	-0.512253	-0.372414	0.974654	0.252851	-0.0726659	-0.257721	-0.802082	-0.0231299	-0.098371	-0.415445	-0.847613	0.512882	0.581422	-0.361929	0.222542	0.979315	1.76021	0.763459
-383.2	-0.827113	-0.422663	-0.217937	0.77508	-0.48284	-0.250602	0.985375	0.219662	-0.137594	-0.253611	-0.841521	-0.0391954	-0.108853	-0.379697	-0.848954	0.471587	0.571239	-0.390009	0.242983	0.943677	1.73684	0.798539
-382.72	-0.828614	-0.394008	-0.272124	0.716796	-0.452826	-0.131558	1.00464	0.190473	-0.205482	-0.243018	-0.876847	-0.0572323	-0.108233	-0.334827	-0.852609	0.422088	0.562532	-0.413672	0.261466	0.914298	1.71354	0.829115
-382.24	-0.826707	-0.37781	-0.326023	0.675657	-0.42425	-0.0444556	1.0313	0.168432	-0.258572	-0.222258	-0.906931	-0.0733256	-0.0973359	-0.290717	-0.84834	0.375628	0.556844	-0.427862	0.274877	0.896075	1.68239	0.84997
-381.76	-0.829768	-0.379407	-0.377527	0.664186	-0.39861	-0.000745849	1.06002	0.151227	-0.288183	-0.188229	-0.926031	-0.0773142	-0.0797075	-0.258388	-0.832238	0.341315	0.553601	-0.4316	0.282107	0.889285	1.63442	0.860469
-381.28	-0.835644	-0.398582	-0.419957	0.676435	-0.379179	0.00119974	1.0839	0.133253	-0.305167	-0.142129	-0.927247	-0.0675537	-0.0593831	-0.240626	-0.809615	0.321705	0.551583	-0.428645	0.280972	0.887887	1.57134	0.864348
-380.8	-0.834505	-0.423773	-0.448209	0.703449	-0.364414	-0.0204764	1.0995	0.11115	-0.323146	-0.0818244	-0.898704	-0.0474091	-0.0392664	-0.236585	-0.791753	0.315276	0.550731	-0.423644	0.27036	0.884982	1.49605	0.868148
-380.32	-0.817461	-0.445086	-0.458928	0.727878	-0.353769	-0.0577315	1.10374	0.0856103	-0.356039	-0.0115607	-0.836685	-0.0256193	-0.0219515	-0.240671	-0.788475	0.312786	0.551485	-0.421248	0.248768	0.873956	1.42158	0.87635
-379.84	-0.781423	-0.456586	-0.453878	0.737184	-0.344348	-0.113982	1.1011	0.0591889	-0.40447	0.0641833	-0.752519	-0.00791285	-0.00792463	-0.248633	-0.800908	0.310686	0.553415	-0.422988	0.218814	0.854179	1.35578	0.888818
-379.36	-0.735792	-0.455686	-0.440282	0.737438	-0.331773	-0.18832	1.09682	0.0353748	-0.457999	0.13998	-0.666319	0.00720039	0.0029872	-0.254788	-0.820255	0.307264	0.556374	-0.427848	0.187742	0.828142	1.29863	0.898447
-378.88	-0.688875	-0.44433	-0.424158	0.746123	-0.314295	-0.269652	1.09373	0.0149172	-0.500678	0.20934	-0.604339	0.0289157	0.0145383	-0.25442	-0.832373	0.309006	0.559805	-0.435229	0.163939	0.801135	1.24893	0.900556
-378.4	-0.641125	-0.425223	-0.406735	0.784358	-0.335211	-0.331591	1.09457	-0.00326873	-0.519082	0.266596	-0.577416	0.065858	0.0274362	-0.243433	-0.828497	0.321163	0.564043	-0.445129	0.152234	0.776549	1.20272	0.893765
-377.92	-0.589666	-0.404794	-0.383709	0.860139	-0.314557	-0.35335	1.09658	-0.0211317	-0.511431	0.306402	-0.579622	0.122013	0.0419997	-0.219187	-0.813516	0.342293	0.569392	-0.456386	0.151589	0.755971	1.16265	0.884955
-377.44	-0.530279	-0.387233	-0.350118	0.96327	-0.29714	-0.337665	1.09897	-0.0387066	-0.480018	0.326234	-0.589513	0.188001	0.0563071	-0.180211	-0.796994	0.366695	0.575668	-0.468546	0.155095	0.736796	1.12973	0.88028
-376.96	-0.461977	-0.375556	-0.305161	1.07042	-0.288264	-0.309177	1.09983	-0.0551703	-0.432449	0.327414	-0.58708	0.249734	0.0677776	-0.130263	-0.787487	0.385305	0.581205	-0.479256	0.154817	0.716904	1.1047	0.885327
-376.48	-0.399746	-0.368288	-0.251886	1.15514	-0.287932	-0.307912	1.09956	-0.0678597	-0.381942	0.31086	-0.565529	0.294647	0.0737974	-0.0754978	-0.784504	0.395826	0.585148	-0.484687	0.146809	0.696883	1.0807	0.897907
-376	-0.359996	-0.363002	-0.201294	1.20801	-0.295291	-0.356006	1.10028	-0.0743288	-0.340034	0.28131	-0.531169	0.316676	0.0754887	-0.0193978	-0.778892	0.401214	0.586627	-0.480993	0.135882	0.680547	1.05584	0.910401
-375.52	-0.349196	-0.355529	-0.157993	1.22906	-0.309423	-0.445155	1.10157	-0.0738223	-0.321826	0.244064	-0.500076	0.320553	0.0744567	0.0357625	-0.758341	0.408384	0.588177	-0.467803	0.131235	0.672552	1.02331	0.916395
-375.04	-0.357405	-0.342476	-0.124375	1.23729	-0.325924	-0.546311	1.10147	-0.0666329	-0.330611	0.201914	-0.4778	0.314146	0.0737572	0.090684	-0.721107	0.418775	0.592923	-0.448771	0.13832	0.674746	0.984598	0.915477
-374.56	-0.361961	-0.32657	-0.0944105	1.24621	-0.341888	-0.634238	1.10168	-0.055592	-0.365569	0.161983	-0.459747	0.302033	0.0752461	0.143021	-0.675457	0.429732	0.604819	-0.429556	0.156842	0.683713	0.945546	0.91259
-374.08	-0.34156	-0.329038	-0.0604416	1.2591	-0.35473	-0.701387	1.10426	-0.0449544	-0.415086	0.133558	-0.433363	0.286708	0.0794243	0.189478	-0.635894	0.433197	0.623795	-0.414565	0.177982	0.69344	0.911586	0.916284
-373.6	-0.287538	-0.321554	-0.0217482	1.27411	-0.361934	-0.756343	1.11778	-0.0399375	-0.466305	0.127445	-0.392091	0.267448	0.0852488	0.221299	-0.616284	0.424622	0.64581	-0.407023	0.193233	0.69928	0.887343	0.928808
-373.12	-0.206746	-0.323155	0.0194658	1.28442	-0.362017	-0.811428	1.14926	-0.0442756	-0.509368	0.148657	-0.338401	0.24284	0.0913147	0.235466	-0.618819	0.405947	0.665172	-0.405893	0.199543	0.700512	0.874286	0.947338
-372.64	-0.118245	-0.330503	0.0554275	1.29232	-0.35361	-0.873849	1.20105	-0.0590122	-0.543035	0.192585	-0.287346	0.215881	0.0967721	0.231182	-0.636604	0.385953	0.676522	-0.408551	0.199593	0.698926	0.869364	0.961851
-372.16	-0.0348494	-0.339633	0.0834004	1.29978	-0.337683	-0.933488	1.26692	-0.0811704	-0.572267	0.245701	-0.250628	0.190021	0.0974642	0.214467	-0.654347	0.374041	0.679298	-0.41209	0.199848	0.696516	0.865925	0.966291
-371.68	0.0369812	-0.354646	0.104502	1.31742	-0.317677	-0.978784	1.3317	-0.104759	-0.602505	0.291538	-0.231281	0.168009	0.0914811	0.194322	-0.663505	0.376729	0.677806	-0.415773	0.204753	0.691441	0.858539	0.961242
-371.2	0.0980871	-0.37873	0.123323	1.34194	-0.300261	-1.00055	1.37903	-0.123942	-0.636879	0.317768	-0.22608	0.152832	0.0787189	0.178124	-0.662625	0.391338	0.677844	-0.419794	0.212621	0.680137	0.846388	0.953336
-370.72	0.153577	-0.414814	0.140674	1.36518	-0.28853	-0.996317	1.39113	-0.134027	-0.672689	0.32343	-0.235519	0.139596	0.0618847	0.166782	-0.657901	0.41025	0.685556	-0.424478	0.217728	0.661912	0.831036	0.950919
-370.24	0.202139	-0.452788	0.14958	1.38245	-0.286569	-0.968557	1.36468	-0.132596	-0.70485	0.318601	-0.254373	0.123156	0.0451143	0.160324	-0.657241	0.426566	0.702288	-0.430698	0.215799	0.638919	0.814754	0.959147
-369.76	0.235871	-0.485682	0.143522	1.39398	-0.29093	-0.917289	1.30555	-0.119593	-0.728388	0.31747	-0.281822	0.10015	0.0330386	0.161691	-0.664083	0.436997	0.725779	-0.437433	0.206588	0.616811	0.807581	0.977262
-369.28	0.24613	-0.508491	0.122377	1.40252	-0.296952	-0.847679	1.23066	-0.0969552	-0.73553	0.329367	-0.314512	0.0688726	0.0264557	0.177733	-0.673249	0.444883	0.750577	-0.443	0.193497	0.600137	0.81235	1.0003
-368.8	0.229787	-0.525475	0.0988959	1.42345	-0.302306	-0.773409	1.15819	-0.068229	-0.720031	0.356412	-0.337049	0.0344644	0.0218592	0.21456	-0.677981	0.456755	0.770886	-0.445636	0.181354	0.589478	0.824891	1.0226
-368.32	0.188496	-0.543498	0.0878265	1.45787	-0.307405	-0.707416	1.09743	-0.0376562	-0.681271	0.389528	-0.339658	0.00600432	0.0151527	0.272755	-0.674887	0.475586	0.783941	-0.444922	0.17339	0.583484	0.838806	1.04166
-367.84	0.139312	-0.566318	0.101896	1.49277	-0.316294	-0.668009	1.046	-0.0102784	-0.623892	0.418544	-0.318326	-0.0091344	0.00463088	0.343	-0.659563	0.498792	0.791532	-0.441723	0.170664	0.580435	0.845834	1.0582
-367.36	0.0942258	-0.590832	0.139882	1.51199	-0.335854	-0.667509	0.995764	0.0100612	-0.561809	0.440424	-0.285295	-0.00906947	-0.00701651	0.408834	-0.639734	0.522076	0.79746	-0.437005	0.172489	0.580654	0.844993	1.07528
-366.88	0.0581203	-0.609019	0.189233	1.50191	-0.367395	-0.7042	0.943839	0.0227743	-0.511278	0.457532	-0.25928	0.000424043	-0.0128979	0.45695	-0.621746	0.543049	0.804093	-0.430641	0.176213	0.582423	0.841174	1.09459
-366.4	0.0292466	-0.613658	0.233788	1.46872	-0.407371	-0.766885	0.887126	0.0296684	-0.484373	0.477018	-0.251593	0.0085765	-0.00757139	0.483248	-0.611975	0.561767	0.811682	-0.421941	0.180536	0.579208	0.839298	1.11495
-365.92	-0.00337031	-0.606375	0.263763	1.42854	-0.444865	-0.83922	0.831179	0.0328297	-0.478587	0.50339	-0.265803	0.00908072	0.0109548	0.495727	-0.611173	0.584381	0.817791	-0.409157	0.182472	0.563599	0.842629	1.13385
-365.44	-0.0467491	-0.595319	0.2785	1.39966	-0.472705	-0.902271	0.780802	0.0335617	-0.481109	0.532527	-0.296067	-0.00775429	0.0380143	0.503766	-0.619347	0.614331	0.816363	-0.391548	0.181731	0.533258	0.852868	1.14866
-364.96	-0.10497	-0.589414	0.283061	1.38918	-0.489783	-0.93269	0.734914	0.0298238	-0.475314	0.552388	-0.330468	-0.0420191	0.0677455	0.512277	-0.631004	0.651048	0.805427	-0.368695	0.179928	0.499536	0.867404	1.15921
-364.48	-0.166257	-0.592258	0.282436	1.39033	-0.503713	-0.921983	0.688753	0.0212388	-0.448979	0.550448	-0.361971	-0.0898506	0.0931354	0.52101	-0.642292	0.690094	0.786435	-0.341455	0.17966	0.483467	0.885289	1.16534
-364	-0.21946	-0.599597	0.280959	1.38856	-0.52013	-0.876991	0.638169	0.00833985	-0.401264	0.521197	-0.385073	-0.147726	0.112104	0.522906	-0.651225	0.723361	0.76237	-0.313573	0.183917	0.499511	0.905166	1.16906
-363.52	-0.25425	-0.605971	0.279403	1.37771	-0.545604	-0.822931	0.584736	-0.0049386	-0.339978	0.471224	-0.399297	-0.206948	0.123615	0.515378	-0.658935	0.741902	0.737708	-0.288555	0.193485	0.544381	0.925564	1.17184
-363.04	-0.267386	-0.611406	0.27837	1.36004	-0.576614	-0.798997	0.536804	-0.01479	-0.275295	0.41693	-0.400382	-0.260908	0.128131	0.500772	-0.663388	0.74423	0.714256	-0.271889	0.206509	0.592494	0.941419	1.17329
-362.56	-0.264383	-0.616866	0.278937	1.34532	-0.607398	-0.823996	0.503359	-0.0194793	-0.218376	0.37533	-0.39112	-0.301861	0.128051	0.482778	-0.663895	0.733242	0.690608	-0.265503	0.219497	0.61357	0.945372	1.17398
-362.08	-0.256656	-0.628717	0.281647	1.34527	-0.630195	-0.899115	0.485538	-0.021443	-0.172923	0.355655	-0.377593	-0.328377	0.12531	0.465423	-0.661513	0.71538	0.666878	-0.268116	0.230441	0.590347	0.931348	1.17473
-361.6	-0.245864	-0.649426	0.28037	1.35967	-0.64456	-0.988901	0.47632	-0.0246656	-0.139294	0.355265	-0.374368	-0.344345	0.122261	0.448132	-0.651662	0.699387	0.646574	-0.275247	0.2397	0.530966	0.900872	1.17735
-361.12	-0.230154	-0.675091	0.268148	1.37283	-0.648919	-1.05506	0.463667	-0.0296855	-0.115613	0.36314	-0.386499	-0.35764	0.120519	0.432349	-0.637549	0.690338	0.63681	-0.276776	0.249354	0.463084	0.863618	1.18337
-360.64	-0.213233	-0.697432	0.236073	1.37511	-0.643767	-1.07634	0.444615	-0.0322059	-0.0989994	0.366833	-0.414521	-0.375749	0.121398	0.420476	-0.62264	0.689174	0.643212	-0.268119	0.261401	0.412807	0.832914	1.19149
-360.16	-0.194057	-0.708832	0.183584	1.3581	-0.629704	-1.06105	0.426602	-0.0248359	-0.088015	0.360297	-0.448248	-0.40023	0.124744	0.420612	-0.612146	0.689962	0.664992	-0.248869	0.274949	0.391347	0.817106	1.1987
-359.68	-0.17804	-0.705672	0.116372	1.3207	-0.609228	-1.04353	0.420227	-0.00224056	-0.0780416	0.347612	-0.479359	-0.424499	0.130534	0.437096	-0.611246	0.684735	0.692392	-0.225237	0.286493	0.390252	0.816254	1.2005
-359.2	-0.168379	-0.686993	0.0461793	1.26912	-0.586752	-1.05573	0.433468	0.0330885	-0.0660737	0.335949	-0.504915	-0.44435	0.140827	0.467424	-0.620932	0.668805	0.711836	-0.208437	0.291696	0.394447	0.825626	1.19636
-358.72	-0.168285	-0.654059	-0.0157413	1.20626	-0.57356	-1.10379	0.463267	0.0724538	-0.0489756	0.332115	-0.524507	-0.459606	0.161267	0.503178	-0.639566	0.640154	0.712483	-0.204789	0.287904	0.394762	0.834742	1.18937
-358.24	-0.179484	-0.609944	-0.068451	1.14303	-0.575199	-1.17687	0.496353	0.105262	-0.0236457	0.335289	-0.543831	-0.475657	0.191643	0.528356	-0.661282	0.60154	0.692235	-0.213454	0.27406	0.39234	0.841478	1.18569
-357.76	-0.202907	-0.562625	-0.111318	1.08738	-0.591034	-1.25225	0.518967	0.123997	0.00975336	0.338968	-0.563294	-0.500392	0.227918	0.534803	-0.678262	0.560279	0.660286	-0.227365	0.251597	0.393607	0.851206	1.19189
-357.28	-0.241008	-0.519125	-0.150156	1.05067	-0.612944	-1.30171	0.523278	0.127969	0.0521182	0.33615	-0.578547	-0.538698	0.261107	0.522013	-0.684427	0.523444	0.628397	-0.23624	0.226157	0.400968	0.866318	1.20793
-356.8	-0.294156	-0.484202	-0.18586	1.03644	-0.626195	-1.32635	0.51116	0.121309	0.0957984	0.323442	-0.582701	-0.588856	0.283472	0.499046	-0.677112	0.489604	0.603589	-0.234229	0.202751	0.409377	0.886989	1.22931
-356.32	-0.35279	-0.460519	-0.214091	1.03512	-0.625239	-1.33321	0.489243	0.109138	0.135148	0.307368	-0.571066	-0.64299	0.291253	0.474738	-0.657294	0.45793	0.585451	-0.223411	0.187226	0.413224	0.906337	1.24923
-355.84	-0.404929	-0.441838	-0.22396	1.03192	-0.611425	-1.34131	0.462683	0.0941474	0.165822	0.299382	-0.542938	-0.705957	0.285941	0.454748	-0.628354	0.422551	0.568585	-0.211135	0.182002	0.411327	0.914905	1.26309
-355.36	-0.436655	-0.419091	-0.208982	1.00797	-0.594982	-1.36395	0.432978	0.0772392	0.187787	0.307204	-0.506999	-0.751034	0.273462	0.440104	-0.595355	0.379833	0.549544	-0.204403	0.185486	0.40843	0.906537	1.27107
-354.88	-0.44132	-0.38852	-0.169094	0.959162	-0.58438	-1.40579	0.396508	0.0595577	0.204114	0.333461	-0.46679	-0.787328	0.258204	0.429121	-0.565336	0.328638	0.531384	-0.204604	0.192807	0.412878	0.884749	1.27805
-354.4	-0.429311	-0.353288	-0.114355	0.894207	-0.58562	-1.46915	0.349236	0.0444912	0.218299	0.374059	-0.419285	-0.817432	0.241448	0.420778	-0.540976	0.275103	0.521097	-0.205842	0.196945	0.42915	0.856806	1.29042
-353.92	-0.411619	-0.323926	-0.0576391	0.832805	-0.595364	-1.54449	0.293413	0.035143	0.231183	0.42131	-0.363756	-0.83809	0.223597	0.413948	-0.522452	0.225952	0.523738	-0.201287	0.197886	0.453221	0.833146	1.31213
-353.44	-0.40022	-0.310374	-0.00990098	0.792146	-0.608295	-1.61668	0.236649	0.0325995	0.24081	0.465935	-0.299023	-0.848425	0.204237	0.409034	-0.504592	0.185256	0.539928	-0.189421	0.196927	0.477875	0.814981	1.34186
-352.96	-0.397662	-0.314199	0.023738	0.773832	-0.620847	-1.66768	0.186931	0.0354487	0.239557	0.502905	-0.231579	-0.848451	0.187793	0.404704	-0.48713	0.147197	0.562866	-0.174686	0.19821	0.495033	0.800962	1.37386
-352.48	-0.397588	-0.327855	0.0449409	0.763043	-0.629325	-1.68778	0.14718	0.0404887	0.228283	0.528122	-0.17153	-0.842236	0.17729	0.397752	-0.468924	0.106295	0.584116	-0.164097	0.205196	0.501393	0.789539	1.40226
-352	-0.396069	-0.34173	0.0602077	0.738693	-0.634496	-1.67678	0.117186	0.0450358	0.209504	0.539365	-0.131463	-0.833383	0.173936	0.386701	-0.44848	0.0580807	0.599951	-0.16124	0.216541	0.49816	0.778017	1.4211
-351.52	-0.396252	-0.35042	0.0710315	0.683234	-0.636269	-1.6478	0.0902346	0.0477961	0.198929	0.538034	-0.1141	-0.828731	0.175018	0.375047	-0.42889	0.00551706	0.611999	-0.163737	0.22745	0.489727	0.772975	1.42939
-351.04	-0.409941	-0.360705	0.0803016	0.596453	-0.635413	-1.61216	0.0599934	0.0484523	0.209577	0.527056	-0.116122	-0.828206	0.176254	0.367699	-0.410176	-0.0464089	0.624086	-0.164595	0.233564	0.481462	0.774236	1.43012
-350.56	-0.443869	-0.381349	0.0887399	0.497271	-0.633391	-1.57606	0.0249819	0.0473654	0.240566	0.513882	-0.12889	-0.829933	0.172491	0.367401	-0.390324	-0.0909954	0.637833	-0.158715	0.232819	0.477613	0.782991	1.42887
-350.08	-0.505211	-0.412921	0.0990416	0.408284	-0.63093	-1.5394	-0.0118678	0.0459141	0.28512	0.502728	-0.146489	-0.830196	0.164433	0.370349	-0.370506	-0.124714	0.648771	-0.146686	0.227913	0.479705	0.792615	1.43004
-349.6	-0.585866	-0.4482	0.113335	0.350712	-0.632111	-1.5096	-0.0453204	0.0450934	0.327677	0.495854	-0.16256	-0.829079	0.155694	0.368601	-0.350308	-0.150222	0.649369	-0.134078	0.222078	0.4852	0.793105	1.4369
-349.12	-0.670725	-0.471021	0.141918	0.333059	-0.638741	-1.49443	-0.0727299	0.0478971	0.356525	0.491013	-0.170389	-0.825616	0.153786	0.354196	-0.336041	-0.17197	0.63482	-0.127598	0.217679	0.489409	0.781389	1.44845
-348.64	-0.753254	-0.467991	0.185422	0.352232	-0.651731	-1.50368	-0.0937154	0.0559548	0.371098	0.485397	-0.158029	-0.818209	0.163394	0.329354	-0.330651	-0.188989	0.607861	-0.129433	0.215015	0.486557	0.759165	1.46253
-348.16	-0.831158	-0.441748	0.242918	0.398994	-0.670187	-1.54322	-0.114948	0.0668724	0.382815	0.4795	-0.127064	-0.80625	0.187126	0.302308	-0.33427	-0.203859	0.576418	-0.13704	0.212293	0.474735	0.7316	1.4757
-347.68	-0.902943	-0.407443	0.307728	0.458001	-0.689394	-1.61067	-0.138827	0.0759514	0.404577	0.475205	-0.0817313	-0.788782	0.22125	0.286956	-0.343198	-0.219116	0.551463	-0.146213	0.208738	0.456366	0.702802	1.48543
-347.2	-0.965376	-0.382956	0.373879	0.517756	-0.705093	-1.68799	-0.169871	0.0759361	0.441269	0.476795	-0.0421951	-0.761028	0.260027	0.29086	-0.350644	-0.239496	0.539829	-0.155549	0.205892	0.436559	0.67428	1.49068
-346.72	-1.00167	-0.376141	0.433593	0.564678	-0.715163	-1.76049	-0.205832	0.0644729	0.492133	0.486154	-0.0239478	-0.723517	0.296462	0.311618	-0.353922	-0.268952	0.542093	-0.165538	0.206083	0.418307	0.647043	1.49167
-346.24	-0.995681	-0.385947	0.480905	0.586137	-0.718603	-1.81595	-0.243711	0.0462829	0.543337	0.49973	-0.037911	-0.680913	0.32809	0.337839	-0.349612	-0.304294	0.551722	-0.177958	0.211437	0.402185	0.621517	1.48957
-345.76	-0.943447	-0.399961	0.505665	0.575595	-0.71818	-1.85344	-0.278103	0.0288967	0.584386	0.515386	-0.0796439	-0.641681	0.352719	0.357126	-0.339174	-0.336174	0.559191	-0.189828	0.223071	0.385028	0.597185	1.48612
-345.28	-0.857464	-0.40951	0.502575	0.535284	-0.719282	-1.87161	-0.304755	0.0209716	0.606515	0.528295	-0.13412	-0.611855	0.371443	0.36255	-0.325108	-0.356973	0.554994	-0.194573	0.237786	0.362105	0.577533	1.48505
-344.8	-0.765098	-0.410846	0.470783	0.487529	-0.727919	-1.86944	-0.322211	0.0247928	0.608047	0.53848	-0.183991	-0.597575	0.38414	0.355543	-0.306479	-0.361658	0.534829	-0.183458	0.253745	0.335274	0.567549	1.48799
-344.32	-0.697599	-0.405386	0.413905	0.45758	-0.744886	-1.84569	-0.329394	0.0371072	0.592372	0.544412	-0.226611	-0.593535	0.389445	0.344196	-0.284796	-0.353843	0.500764	-0.151247	0.268172	0.309248	0.568845	1.49338
-343.84	-0.66922	-0.394077	0.347407	0.460333	-0.766495	-1.80194	-0.32619	0.0517834	0.559829	0.548796	-0.263187	-0.590636	0.386885	0.336342	-0.262755	-0.346031	0.462249	-0.101108	0.277379	0.289591	0.582159	1.49779
-343.36	-0.6707	-0.380937	0.286853	0.501013	-0.787968	-1.75098	-0.315682	0.0650247	0.512471	0.551009	-0.31191	-0.584586	0.378962	0.333683	-0.240947	-0.345569	0.429517	-0.0434862	0.280471	0.252114	0.602077	1.49859
-342.88	-0.678973	-0.367039	0.245393	0.560187	-0.806007	-1.70605	-0.301938	0.0773762	0.453401	0.551234	-0.374586	-0.571696	0.369949	0.333619	-0.221763	-0.351406	0.412712	0.00797802	0.278537	0.249093	0.622765	1.49406
-342.4	-0.675573	-0.35844	0.223237	0.611874	-0.820931	-1.67882	-0.287913	0.0917286	0.387863	0.551702	-0.443532	-0.552881	0.364568	0.330119	-0.204888	-0.356752	0.413942	0.0437096	0.275272	0.249776	0.640193	1.48622
-341.92	-0.655199	-0.359283	0.211561	0.642642	-0.836833	-1.67524	-0.277045	0.107257	0.321408	0.553196	-0.498791	-0.534013	0.363172	0.320095	-0.190655	-0.355465	0.43021	0.0610765	0.273685	0.248449	0.653513	1.48031
-341.44	-0.631208	-0.371714	0.197671	0.649217	-0.855726	-1.70176	-0.266665	0.119366	0.260968	0.557811	-0.526643	-0.516935	0.360771	0.306966	-0.175209	-0.34892	0.452407	0.0632856	0.275644	0.245037	0.665928	1.48118
-340.96	-0.624648	-0.390742	0.175621	0.645386	-0.875371	-1.75142	-0.254473	0.12284	0.21528	0.566962	-0.521217	-0.500565	0.35062	0.296493	-0.156681	-0.346847	0.47149	0.0568907	0.281163	0.242289	0.679431	1.49048
-340.48	-0.65127	-0.408175	0.144465	0.65274	-0.891102	-1.81407	-0.241261	0.116691	0.190176	0.582121	-0.493721	-0.478038	0.330096	0.298769	-0.132285	-0.360035	0.481231	0.0482603	0.28712	0.244575	0.69273	1.50489
-340	-0.709886	-0.418865	0.113163	0.684062	-0.897462	-1.86834	-0.223942	0.105931	0.183809	0.604534	-0.461598	-0.441416	0.302903	0.31761	-0.104916	-0.393068	0.481067	0.0406457	0.289499	0.252636	0.701164	1.521
-339.52	-0.787333	-0.420779	0.083538	0.737404	-0.896785	-1.88789	-0.201683	0.101111	0.19636	0.635469	-0.443099	-0.385183	0.277575	0.348824	-0.0752549	-0.43946	0.47512	0.0329014	0.284233	0.262669	0.699117	1.53725
-339.04	-0.865645	-0.41801	0.0530511	0.804334	-0.896145	-1.85073	-0.173	0.108286	0.216846	0.672748	-0.455578	-0.311929	0.261278	0.380385	-0.0445497	-0.49062	0.469627	0.0231663	0.270462	0.270095	0.683321	1.55321
-338.56	-0.92972	-0.416954	0.0171228	0.872985	-0.904725	-1.75966	-0.136841	0.126655	0.244755	0.710093	-0.508277	-0.23073	0.254342	0.399319	-0.0147694	-0.536984	0.471173	0.0107873	0.252805	0.270478	0.659663	1.56997
-338.08	-0.974316	-0.419313	-0.0289969	0.935048	-0.92837	-1.63712	-0.0965379	0.148694	0.279352	0.736373	-0.59515	-0.153841	0.251344	0.398193	0.0141526	-0.577236	0.483317	-0.00174654	0.23756	0.265141	0.637983	1.58804
-337.6	-0.996915	-0.421533	-0.0825501	0.988445	-0.964251	-1.51569	-0.0533285	0.16503	0.323899	0.740674	-0.694771	-0.0920918	0.24614	0.379019	0.0446147	-0.614288	0.505723	-0.0100104	0.229616	0.259603	0.624625	1.60591
-337.12	-1.00214	-0.416514	-0.136893	1.03222	-1.00413	-1.41265	-0.0137986	0.171906	0.380296	0.721779	-0.777798	-0.0440669	0.235595	0.348392	0.0775282	-0.650878	0.533856	-0.0109711	0.231314	0.259657	0.620414	1.62142
-336.64	-0.992605	-0.398986	-0.187081	1.06631	-1.03848	-1.32793	0.0180313	0.171135	0.441633	0.685805	-0.812148	-0.0020579	0.222976	0.313187	0.112508	-0.688047	0.561956	-0.00427608	0.240251	0.265734	0.617509	1.63407
-336.16	-0.974384	-0.36441	-0.230407	1.08841	-1.06174	-1.24481	0.0407139	0.168282	0.498919	0.645971	-0.77803	0.0394772	0.213283	0.275672	0.149413	-0.718245	0.58421	0.00701822	0.253268	0.274698	0.606739	1.64377
-335.68	-0.959166	-0.313556	-0.270608	1.09621	-1.0721	-1.15058	0.0552195	0.166195	0.541659	0.613287	-0.682754	0.0803634	0.207632	0.23401	0.186888	-0.73541	0.598047	0.0182829	0.2663	0.277564	0.589259	1.65321
-335.2	-0.957064	-0.249166	-0.308553	1.08675	-1.07379	-1.05181	0.0673202	0.16447	0.5708	0.591501	-0.550387	0.111695	0.201699	0.189366	0.221917	-0.733951	0.605429	0.0273268	0.276867	0.271588	0.571469	1.66344
-334.72	-0.97099	-0.177164	-0.344727	1.05921	-1.07056	-0.971451	0.0842425	0.160707	0.5901	0.572545	-0.419583	0.122293	0.189697	0.149065	0.253393	-0.7152	0.610024	0.036098	0.282491	0.260205	0.565564	1.67451
-334.24	-0.991586	-0.107635	-0.380231	1.01627	-1.06421	-0.929061	0.107796	0.155585	0.611826	0.546168	-0.318319	0.109042	0.168801	0.124069	0.28069	-0.684879	0.616339	0.0474175	0.282237	0.251805	0.578666	1.68455
-333.76	-1.00177	-0.0495758	-0.413402	0.966217	-1.05448	-0.928271	0.141875	0.150064	0.63923	0.50711	-0.255684	0.0822067	0.143304	0.119869	0.301284	-0.651453	0.62698	0.0616578	0.27576	0.253368	0.606191	1.69267
-333.28	-0.981485	-0.00973497	-0.449397	0.919071	-1.04211	-0.952869	0.183654	0.147372	0.666765	0.45698	-0.222905	0.0584106	0.12148	0.13095	0.314057	-0.621239	0.643448	0.0752583	0.265082	0.266441	0.637186	1.69923
-332.8	-0.925323	0.0124963	-0.492245	0.884487	-1.02936	-0.976576	0.230237	0.147498	0.679745	0.406749	-0.202159	0.0480806	0.109399	0.142507	0.315646	-0.593932	0.663784	0.0834833	0.254202	0.284143	0.664679	1.70641
-332.32	-0.839709	0.0239365	-0.545206	0.868455	-1.01975	-0.977158	0.273388	0.147918	0.67597	0.367842	-0.181451	0.0521423	0.106392	0.141703	0.307077	-0.564186	0.686718	0.0838301	0.249577	0.298748	0.687498	1.71496
-331.84	-0.744428	0.038869	-0.604737	0.87293	-1.01672	-0.947392	0.309305	0.146806	0.663785	0.346758	-0.157091	0.0575203	0.105708	0.126427	0.288866	-0.528519	0.71055	0.0803621	0.253815	0.305707	0.71554	1.72523
-331.36	-0.654615	0.0664377	-0.661615	0.897909	-1.01959	-0.890328	0.333302	0.143928	0.661898	0.341742	-0.125594	0.0549754	0.0985066	0.102228	0.266014	-0.488608	0.73448	0.0815601	0.26517	0.307883	0.755322	1.73766
-330.88	-0.582667	0.109105	-0.709864	0.940761	-1.02609	-0.817644	0.345777	0.142442	0.688186	0.343061	-0.0840636	0.0445721	0.0795843	0.0929026	0.244932	-0.448483	0.759277	0.0960386	0.277294	0.312341	0.808779	1.75076
-330.4	-0.531752	0.162525	-0.748175	0.995595	-1.03113	-0.749144	0.351607	0.145078	0.743998	0.340328	-0.0222005	0.0341674	0.0508002	0.073843	0.231428	-0.419711	0.785748	0.127726	0.284888	0.324642	0.868101	1.76337
-329.92	-0.503289	0.221657	-0.778788	1.04999	-1.0301	-0.701477	0.357221	0.15239	0.816524	0.328368	0.0640607	0.031771	0.0174921	0.0616961	0.229846	-0.409074	0.813422	0.171292	0.285192	0.344861	0.921363	1.77219
-329.44	-0.501519	0.282565	-0.805856	1.09489	-1.02151	-0.69088	0.364066	0.16048	0.88834	0.310972	0.161187	0.0321422	-0.0143428	0.0520795	0.242038	-0.417654	0.840686	0.217384	0.280507	0.367358	0.959266	1.77896
-328.96	-0.531629	0.346419	-0.826021	1.12079	-1.00419	-0.726105	0.37682	0.166651	0.946794	0.295422	0.248646	0.0236971	-0.0437674	0.0452491	0.265609	-0.440612	0.862906	0.257833	0.276218	0.386918	0.981877	1.78315
-328.48	-0.594779	0.414914	-0.837984	1.12216	-0.98076	-0.798962	0.396383	0.169717	0.990169	0.292627	0.30853	-0.0041412	-0.0718877	0.0416738	0.296895	-0.468838	0.876179	0.28711	0.275436	0.400186	0.993903	1.7865
-328	-0.678155	0.487168	-0.841432	1.10542	-0.951073	-0.891476	0.426116	0.173269	1.02626	0.30611	0.336475	-0.0462374	-0.100742	0.0472503	0.332981	-0.495486	0.876913	0.305702	0.277554	0.406678	0.999784	1.79348
-327.52	-0.758239	0.559388	-0.83889	1.08207	-0.916605	-0.975701	0.466328	0.180823	1.05826	0.332545	0.340288	-0.0825419	-0.131346	0.0622771	0.367713	-0.517472	0.865861	0.316736	0.281361	0.408295	1.00049	1.80524
-327.04	-0.810128	0.622006	-0.837281	1.06202	-0.877483	-1.02266	0.517404	0.194292	1.08174	0.361192	0.333846	-0.0873573	-0.161442	0.0820334	0.398728	-0.535669	0.847135	0.320525	0.287818	0.407171	0.996244	1.81963
-326.56	-0.82749	0.671827	-0.843825	1.05415	-0.836451	-1.01486	0.572049	0.2106	1.08791	0.37828	0.328909	-0.0520571	-0.188342	0.0988994	0.418797	-0.549662	0.826441	0.317163	0.300271	0.405416	0.98797	1.83437
-326.08	-0.819625	0.709424	-0.855392	1.05987	-0.795878	-0.941674	0.621702	0.225301	1.07387	0.375297	0.327947	0.0126533	-0.210699	0.107523	0.428191	-0.557834	0.809429	0.307755	0.323618	0.403144	0.977291	1.84475
-325.6	-0.805816	0.736597	-0.865412	1.07357	-0.755952	-0.813561	0.657762	0.234296	1.04015	0.349077	0.325986	0.0799782	-0.226815	0.105738	0.429007	-0.557867	0.797693	0.284747	0.357221	0.401585	0.969711	1.84923
-325.12	-0.807356	0.756556	-0.862306	1.092	-0.716739	-0.645771	0.676072	0.238346	0.989569	0.307443	0.322909	0.127039	-0.238886	0.098877	0.426113	-0.548665	0.791723	0.278783	0.39587	0.400815	0.971068	1.85052
-324.64	-0.83179	0.765852	-0.835768	1.11349	-0.675279	-0.467602	0.679906	0.240759	0.923152	0.264677	0.325203	0.148647	-0.248813	0.091027	0.426498	-0.536422	0.790845	0.283021	0.431257	0.398696	0.98384	1.85295
-324.16	-0.876005	0.763585	-0.789904	1.13554	-0.630712	-0.310254	0.672905	0.246434	0.845372	0.236038	0.334495	0.157972	-0.26024	0.0838261	0.433785	-0.527044	0.795055	0.297291	0.458588	0.39257	1.00649	1.86004
-323.68	-0.931919	0.752673	-0.73175	1.16031	-0.580928	-0.198681	0.657914	0.258075	0.766595	0.229663	0.347761	0.174111	-0.276104	0.0789869	0.44566	-0.525769	0.804394	0.315631	0.478123	0.378528	1.03626	1.87282
-323.2	-0.993616	0.742717	-0.67327	1.18343	-0.52628	-0.143307	0.638628	0.275852	0.705729	0.243972	0.349742	0.207514	-0.297453	0.0770752	0.456241	-0.533611	0.818842	0.330662	0.494978	0.355814	1.06767	1.88845
-322.72	-1.06336	0.744666	-0.625991	1.19777	-0.471967	-0.132258	0.615018	0.298434	0.684803	0.268966	0.326068	0.255917	-0.320791	0.0835321	0.461912	-0.550408	0.834832	0.339096	0.512427	0.328606	1.09701	1.90329
-322.24	-1.14718	0.760596	-0.593724	1.19215	-0.422469	-0.149444	0.591549	0.323142	0.715872	0.291989	0.272551	0.306084	-0.339465	0.105776	0.461313	-0.571909	0.846911	0.343064	0.529894	0.302575	1.12528	1.91389
-321.76	-1.23788	0.782805	-0.575863	1.16303	-0.383597	-0.182529	0.570227	0.348866	0.785886	0.301001	0.195943	0.348363	-0.346617	0.147182	0.455906	-0.595347	0.851796	0.349212	0.54171	0.281535	1.15768	1.92012
-321.28	-1.3216	0.795989	-0.562083	1.10379	-0.356149	-0.227733	0.555178	0.373989	0.863326	0.291787	0.121745	0.379103	-0.338613	0.203774	0.452509	-0.620354	0.850126	0.363077	0.540206	0.265575	1.20212	1.92315
-320.8	-1.37677	0.789902	-0.546533	1.02264	-0.336612	-0.290959	0.545139	0.397158	0.914346	0.269511	0.0709919	0.405658	-0.318069	0.262814	0.453713	-0.647284	0.847631	0.386308	0.525663	0.25393	1.25491	1.92626
-320.32	-1.38722	0.763283	-0.524136	0.935908	-0.317335	-0.376747	0.535323	0.417647	0.923319	0.243576	0.0545034	0.435206	-0.293453	0.30669	0.454784	-0.671993	0.852479	0.414163	0.502985	0.244569	1.312	1.93038
-319.84	-1.34711	0.726985	-0.499308	0.863747	-0.292736	-0.483991	0.525867	0.434573	0.900727	0.227452	0.0734942	0.468395	-0.271609	0.321785	0.451076	-0.691551	0.867744	0.438795	0.482456	0.239034	1.3607	1.93429
-319.36	-1.2726	0.692711	-0.47466	0.822628	-0.258123	-0.599793	0.519394	0.448793	0.871495	0.228047	0.113191	0.498133	-0.255691	0.302799	0.440738	-0.703403	0.888699	0.455481	0.470099	0.238284	1.39258	1.93393
-318.88	-1.18309	0.664556	-0.456093	0.814042	-0.221342	-0.713424	0.525783	0.462415	0.854264	0.245503	0.1512	0.515879	-0.245782	0.257509	0.429039	-0.707993	0.903077	0.461669	0.46502	0.243792	1.40549	1.92658
-318.4	-1.10046	0.641792	-0.44196	0.826327	-0.18821	-0.81535	0.555339	0.476228	0.855651	0.273163	0.182429	0.515573	-0.237631	0.200713	0.425384	-0.712533	0.899854	0.458785	0.460424	0.251006	1.40607	1.91202
-317.92	-1.0384	0.617013	-0.425498	0.83827	-0.164537	-0.897632	0.610255	0.491364	0.8687	0.299556	0.211764	0.501827	-0.228141	0.147758	0.44014	-0.726371	0.876922	0.449773	0.447456	0.254837	1.40136	1.88936
-317.44	-0.999651	0.587724	-0.399886	0.832043	-0.152274	-0.945433	0.68437	0.507041	0.894955	0.313722	0.254259	0.480268	-0.216825	0.105192	0.474037	-0.754836	0.84163	0.436771	0.422636	0.253523	1.39121	1.86529
-316.96	-0.976106	0.553854	-0.365277	0.806329	-0.147234	-0.954303	0.763484	0.521574	0.940901	0.309297	0.331339	0.458464	-0.205999	0.0722327	0.521874	-0.799468	0.807079	0.421659	0.389507	0.246707	1.36961	1.84263
-316.48	-0.953786	0.520266	-0.324992	0.772058	-0.144919	-0.933176	0.833586	0.533253	1.01358	0.285188	0.452726	0.435716	-0.196206	0.0407212	0.571911	-0.849729	0.781834	0.406499	0.35716	0.241229	1.3303	1.82267
-316	-0.924959	0.490608	-0.282352	0.747194	-0.138176	-0.901982	0.893723	0.541671	1.11255	0.245922	0.608844	0.406728	-0.186816	0.00495322	0.614841	-0.893485	0.764343	0.39339	0.333198	0.240852	1.27331	1.8064
-315.52	-0.886592	0.465252	-0.238527	0.742641	-0.127724	-0.885312	0.945289	0.547968	1.21865	0.19931	0.772701	0.367119	-0.175655	-0.035611	0.64704	-0.919972	0.742667	0.385786	0.322386	0.246914	1.21069	1.78909
-315.04	-0.843899	0.445434	-0.1922	0.749169	-0.113462	-0.899049	0.993945	0.55441	1.3044	0.155769	0.909643	0.319164	-0.16185	-0.0746554	0.671198	-0.928528	0.704631	0.384714	0.32335	0.254496	1.15961	1.76841
-314.56	-0.802293	0.432716	-0.142078	0.74775	-0.0969192	-0.941801	1.04266	0.561152	1.35607	0.120203	0.997753	0.271417	-0.146818	-0.103985	0.691815	-0.925824	0.649082	0.389778	0.329776	0.259039	1.12968	1.743
-314.08	-0.769012	0.426922	-0.0948003	0.724567	-0.078965	-0.988136	1.08676	0.567456	1.38166	0.0941495	1.03434	0.234364	-0.133196	-0.117088	0.712197	-0.921043	0.586181	0.398272	0.33614	0.258366	1.1145	1.71478
-313.6	-0.73901	0.424875	-0.062311	0.678156	-0.0629347	-1.00725	1.12095	0.56926	1.41056	0.0708576	1.03787	0.213491	-0.122802	-0.111936	0.73349	-0.921155	0.533935	0.407807	0.337808	0.258017	1.09753	1.68647
-313.12	-0.713458	0.421657	-0.0537692	0.620118	-0.0497713	-0.98593	1.13826	0.563125	1.4691	0.0418511	1.03874	0.207942	-0.116967	-0.090478	0.7545	-0.925533	0.504756	0.417625	0.333167	0.263832	1.06658	1.65989
-312.64	-0.685375	0.414013	-0.0669164	0.562125	-0.0426305	-0.927862	1.13776	0.547671	1.56497	-0.00127069	1.05869	0.209858	-0.115024	-0.0539054	0.774831	-0.925959	0.498481	0.426636	0.322834	0.280161	1.02429	1.63768
-312.16	-0.657636	0.406738	-0.0898225	0.513415	-0.0413472	-0.857592	1.12299	0.527397	1.68002	-0.0554474	1.09378	0.209994	-0.116031	-0.00156272	0.790421	-0.916043	0.505741	0.434104	0.309607	0.302789	0.98443	1.6225
-311.68	-0.629955	0.408953	-0.106463	0.469082	-0.0436495	-0.803668	1.10091	0.508998	1.78026	-0.110669	1.13183	0.199964	-0.118684	0.0640705	0.796904	-0.894964	0.514201	0.437237	0.295119	0.324287	0.962111	1.61504
-311.2	-0.60415	0.433917	-0.107327	0.424043	-0.0483073	-0.780621	1.07859	0.498034	1.84443	-0.155516	1.14953	0.177002	-0.122345	0.137406	0.793284	-0.863394	0.518017	0.434163	0.280802	0.337688	0.963051	1.61603
-310.72	-0.580475	0.486787	-0.0945019	0.373774	-0.0494551	-0.785351	1.062	0.495584	1.86836	-0.181721	1.13818	0.142895	-0.128236	0.208172	0.779081	-0.823713	0.522525	0.424607	0.267655	0.342475	0.974825	1.62248
-310.24	-0.553844	0.559465	-0.0822586	0.323618	-0.0424805	-0.79771	1.05219	0.496047	1.86493	-0.191015	1.10003	0.10127	-0.135865	0.266046	0.75916	-0.77318	0.534995	0.410809	0.257514	0.344882	0.98236	1.63197
-309.76	-0.521695	0.629788	-0.0834018	0.277971	-0.026487	-0.792554	1.04732	0.491292	1.84853	-0.194249	1.05511	0.057362	-0.146968	0.306752	0.7409	-0.706243	0.558281	0.398091	0.253018	0.353641	0.979751	1.64021
-309.28	-0.478648	0.676944	-0.104106	0.249465	-0.00137507	-0.759702	1.04435	0.475934	1.82395	-0.197981	1.0212	0.0202053	-0.158816	0.333754	0.732654	-0.623254	0.587625	0.390819	0.258245	0.373453	0.973322	1.64463
-308.8	-0.424895	0.694615	-0.138788	0.24236	0.0272033	-0.708445	1.04119	0.450109	1.78828	-0.206026	1.00923	-0.00203044	-0.17001	0.354789	0.739929	-0.531728	0.614809	0.390377	0.275603	0.403802	0.975087	1.64584
-308.32	-0.361286	0.686559	-0.176619	0.260947	0.0514216	-0.652443	1.03746	0.419769	1.73511	-0.21418	1.01129	0.00122141	-0.177186	0.376764	0.763434	-0.446417	0.636088	0.394436	0.303974	0.438769	0.99787	1.64621
-307.84	-0.289985	0.668993	-0.208404	0.301351	0.0620939	-0.617124	1.03217	0.391698	1.66704	-0.213855	1.01301	0.0334669	-0.178154	0.398394	0.797469	-0.381339	0.655397	0.397108	0.337628	0.470768	1.03776	1.6465
-307.36	-0.218077	0.656689	-0.227604	0.356861	0.0533992	-0.604386	1.02458	0.370642	1.59856	-0.20151	1.00407	0.0908525	-0.172523	0.411083	0.836371	-0.336641	0.681512	0.393478	0.367926	0.493821	1.08685	1.64689
-306.88	-0.152583	0.655635	-0.23548	0.42079	0.0294064	-0.591182	1.01009	0.357241	1.54048	-0.182694	0.983654	0.162106	-0.164521	0.406559	0.871519	-0.302013	0.717937	0.381899	0.389291	0.50718	1.13514	1.64718
-306.4	-0.100886	0.665857	-0.238531	0.478958	-0.00322705	-0.539718	0.988057	0.349427	1.49953	-0.16896	0.970086	0.233269	-0.158827	0.383507	0.896408	-0.263504	0.759279	0.362978	0.401169	0.5129	1.17789	1.64758
-305.92	-0.066829	0.680435	-0.242875	0.526003	-0.0344374	-0.419817	0.957287	0.346834	1.47036	-0.168512	0.984443	0.290212	-0.160108	0.35132	0.907964	-0.211286	0.795161	0.340458	0.409252	0.517269	1.21544	1.64903
-305.44	-0.0521963	0.696728	-0.249996	0.563557	-0.0575119	-0.228781	0.91892	0.349658	1.4405	-0.180128	1.03881	0.325661	-0.169963	0.321311	0.90137	-0.148853	0.816858	0.318553	0.420857	0.52536	1.25246	1.65293
-304.96	-0.0568359	0.709955	-0.264722	0.606285	-0.0709728	-0.00501171	0.878586	0.357028	1.40343	-0.193844	1.12173	0.337324	-0.184356	0.29832	0.879697	-0.0848864	0.825514	0.30075	0.441497	0.540679	1.29033	1.65983
-304.48	-0.0842362	0.717176	-0.284315	0.664183	-0.076251	0.188706	0.841184	0.365182	1.36352	-0.201224	1.21161	0.332134	-0.198249	0.279196	0.84778	-0.0281107	0.829666	0.28903	0.469236	0.564046	1.32771	1.66909
-304	-0.137649	0.712207	-0.308256	0.744857	-0.0764321	0.296611	0.809468	0.368286	1.33006	-0.196112	1.28739	0.314035	-0.209208	0.249692	0.815176	0.0217433	0.838138	0.284726	0.498095	0.592998	1.36469	1.67823
-303.52	-0.216581	0.691453	-0.335987	0.846313	-0.0727721	0.301524	0.783312	0.362852	1.31079	-0.182928	1.34361	0.290308	-0.215013	0.198498	0.790105	0.0707394	0.851529	0.28776	0.519655	0.621002	1.40008	1.6849
-303.04	-0.308742	0.653876	-0.36539	0.955423	-0.0681008	0.230186	0.764652	0.35138	1.30285	-0.171063	1.38495	0.268322	-0.216144	0.12554	0.777688	0.124287	0.862175	0.296861	0.530945	0.64294	1.42993	1.68671
-302.56	-0.395423	0.604712	-0.398586	1.05514	-0.0654373	0.133275	0.753291	0.341285	1.29352	-0.168037	1.42897	0.253218	-0.213225	0.0414299	0.775214	0.181159	0.864047	0.309393	0.534103	0.657252	1.44969	1.68342
-302.08	-0.45506	0.555321	-0.434959	1.13263	-0.0686672	0.0589503	0.748308	0.339269	1.27168	-0.177637	1.48256	0.250481	-0.204929	-0.0364885	0.778157	0.231789	0.858925	0.322907	0.531667	0.664331	1.45536	1.67585
-301.6	-0.484778	0.519113	-0.472083	1.18026	-0.079378	0.029115	0.748178	0.344459	1.23462	-0.197112	1.53676	0.260988	-0.191687	-0.0932829	0.781967	0.271162	0.857542	0.334758	0.52668	0.667137	1.44538	1.66834
-301.12	-0.496314	0.505212	-0.505796	1.20015	-0.0962154	0.0379485	0.747853	0.3477	1.18821	-0.22486	1.5762	0.279984	-0.174957	-0.121585	0.785166	0.299558	0.869609	0.341872	0.529341	0.666315	1.42331	1.66505
-300.64	-0.519439	0.518076	-0.533254	1.20158	-0.114026	0.0653351	0.740989	0.336931	1.14852	-0.255396	1.58619	0.298352	-0.157694	-0.125492	0.79083	0.325127	0.895058	0.341996	0.518809	0.664386	1.39755	1.66796
-300.16	-0.576929	0.553662	-0.554772	1.19892	-0.176556	0.0944101	0.723661	0.30702	1.12399	-0.284583	1.56421	0.308667	-0.14092	-0.111709	0.802902	0.358617	0.920594	0.335478	0.502109	0.660884	1.37302	1.67559
-299.68	-0.671194	0.602127	-0.572356	1.20079	-0.187683	0.12621	0.695995	0.263855	1.11099	-0.305614	1.51868	0.304391	-0.123575	-0.0884015	0.823579	0.404543	0.932169	0.323271	0.48562	0.657789	1.35328	1.6845
-299.2	-0.787708	0.651197	-0.588798	1.20291	-0.200859	0.169041	0.65933	0.220971	1.09437	-0.314164	1.46774	0.285645	-0.101303	-0.0607091	0.847749	0.459251	0.921759	0.311076	0.47692	0.657987	1.33658	1.69142
-298.72	-0.901892	0.685346	-0.603438	1.19806	-0.219974	0.231794	0.616245	0.190086	1.06324	-0.310167	1.42075	0.256467	-0.0710559	-0.0340994	0.866416	0.510327	0.895104	0.302884	0.480593	0.662636	1.32294	1.6954
-298.24	-0.999625	0.694923	-0.612994	1.17813	-0.245471	0.309931	0.566381	0.174853	1.00606	-0.299765	1.38022	0.226325	-0.0332271	-0.0129581	0.872083	0.547699	0.864744	0.302381	0.494162	0.673153	1.31176	1.69957
-297.76	-1.07928	0.678811	-0.614435	1.14405	-0.273801	0.390546	0.512571	0.169321	0.925873	-0.291766	1.3363	0.207497	0.00631993	-0.00241939	0.863427	0.568723	0.842998	0.309593	0.50806	0.688161	1.30739	1.70571
-297.28	-1.14739	0.643743	-0.612044	1.11393	-0.299268	0.45403	0.459397	0.164352	0.827458	-0.295419	1.27928	0.206498	0.0401706	-0.00535236	0.846797	0.577049	0.830956	0.319692	0.51205	0.706594	1.3118	1.71518
-296.8	-1.20678	0.601248	-0.609217	1.10473	-0.315176	0.485733	0.411803	0.154114	0.723609	-0.310569	1.2073	0.222697	0.0614834	-0.0221374	0.833019	0.578769	0.823331	0.327704	0.502502	0.725633	1.32136	1.72415
-296.32	-1.25081	0.558999	-0.610288	1.11998	-0.319445	0.479809	0.375475	0.139059	0.627284	-0.330065	1.12652	0.250118	0.070472	-0.0493622	0.830017	0.579252	0.813124	0.329905	0.482231	0.744691	1.32582	1.72701
-295.84	-1.2715	0.521857	-0.616135	1.14588	-0.316617	0.441812	0.354754	0.12421	0.547172	-0.349078	1.05054	0.27551	0.0704192	-0.0819569	0.83864	0.582748	0.797803	0.328033	0.460255	0.762562	1.31706	1.72081
-295.36	-1.26611	0.489144	-0.622683	1.15257	-0.311882	0.384852	0.344528	0.113266	0.492937	-0.361824	0.988033	0.288865	0.0662907	-0.116638	0.851777	0.589265	0.779559	0.32601	0.442595	0.777649	1.2905	1.70447
-294.88	-1.24991	0.456261	-0.630458	1.11819	-0.309107	0.322627	0.339751	0.107022	0.469465	-0.372767	0.944091	0.281601	0.0614018	-0.150219	0.862463	0.599385	0.762436	0.329015	0.431	0.787736	1.25277	1.68061
-294.4	-1.24314	0.42468	-0.64031	1.04878	-0.31116	0.26554	0.332282	0.103105	0.472124	-0.383866	0.91191	0.256003	0.054157	-0.181464	0.864995	0.614389	0.74765	0.338841	0.422294	0.791495	1.21163	1.65115
-293.92	-1.26444	0.396142	-0.651831	0.967919	-0.318236	0.218896	0.318286	0.0994782	0.488269	-0.395484	0.888961	0.224185	0.0432561	-0.208637	0.863236	0.63543	0.733752	0.352142	0.410944	0.787243	1.17407	1.61864
-293.44	-1.31395	0.37724	-0.664975	0.905491	-0.332456	0.184727	0.299513	0.0957296	0.506558	-0.402136	0.871667	0.199548	0.0281635	-0.232304	0.864795	0.660396	0.718965	0.365238	0.397024	0.775974	1.13832	1.58482
-292.96	-1.37919	0.372811	-0.676901	0.874039	-0.353365	0.166254	0.278845	0.0914138	0.518777	-0.399464	0.866701	0.19244	0.0117115	-0.250839	0.875174	0.68253	0.701389	0.373608	0.383128	0.758912	1.10005	1.55262
-292.48	-1.44016	0.382793	-0.677462	0.865694	-0.378738	0.166715	0.260164	0.0859573	0.524584	-0.387046	0.880717	0.20598	-0.00330489	-0.265067	0.893387	0.694247	0.688251	0.376222	0.372844	0.737997	1.05526	1.52661
-292	-1.48594	0.406408	-0.659187	0.860013	-0.400839	0.185898	0.250131	0.0783429	0.534169	-0.371409	0.910034	0.231417	-0.0142207	-0.275293	0.913414	0.689966	0.657281	0.37523	0.366695	0.715119	1.00401	1.50906
-291.52	-1.51396	0.440957	-0.621678	0.844446	-0.410946	0.222092	0.249439	0.0683137	0.552028	-0.360505	0.94104	0.254138	-0.0201184	-0.281794	0.928405	0.671559	0.619009	0.371393	0.362522	0.692112	0.952882	1.49937
-291.04	-1.52876	0.480424	-0.567267	0.818678	-0.401805	0.261371	0.262577	0.0577065	0.576317	-0.361775	0.955247	0.262559	-0.0206648	-0.285652	0.93886	0.647955	0.576763	0.361867	0.356655	0.670066	0.910678	1.49371
-290.56	-1.5365	0.519514	-0.504317	0.795859	-0.37424	0.291112	0.291169	0.0495237	0.596432	-0.373189	0.943805	0.255631	-0.0143053	-0.288654	0.950227	0.631358	0.536556	0.342027	0.346247	0.650067	0.879018	1.48994
-290.08	-1.53603	0.552314	-0.440073	0.784449	-0.333208	0.304385	0.331736	0.0450394	0.600175	-0.386501	0.917661	0.239263	-0.00135135	-0.291515	0.969816	0.627577	0.508291	0.309139	0.333318	0.632141	0.858683	1.4888
-289.6	-1.52748	0.579351	-0.379704	0.787289	-0.288224	0.302802	0.376332	0.0417704	0.587251	-0.392908	0.899137	0.223523	0.0151145	-0.291641	1.00342	0.638836	0.498716	0.266493	0.321109	0.617396	0.841615	1.49262
-289.12	-1.51198	0.602844	-0.32713	0.793029	-0.246088	0.30074	0.416192	0.0371592	0.565873	-0.384564	0.904848	0.216112	0.0284984	-0.281256	1.04784	0.655701	0.508615	0.225394	0.312779	0.603782	0.822511	1.50358
-288.64	-1.48559	0.629654	-0.284055	0.793802	-0.207675	0.311467	0.440789	0.0292539	0.597213	-0.361197	0.927604	0.219828	0.031623	-0.248809	1.09594	0.67189	0.533011	0.198812	0.309005	0.591029	0.800514	1.51844
-288.16	-1.4464	0.665641	-0.250884	0.787332	-0.170763	0.332725	0.449398	0.0200896	0.598704	-0.325781	0.944362	0.232879	0.0217598	-0.187518	1.14204	0.682611	0.564348	0.195619	0.306931	0.57692	0.774011	1.53198
-287.68	-1.38974	0.713792	-0.22532	0.77592	-0.134828	0.35047	0.450902	0.0146207	0.618303	-0.287786	0.929522	0.253977	0.00407584	-0.0992968	1.18618	0.689334	0.594763	0.215295	0.303344	0.561674	0.744135	1.53702
-287.2	-1.3158	0.772543	-0.20098	0.763266	-0.100444	0.347144	0.459564	0.0164172	0.646275	-0.253965	0.879132	0.281006	-0.0104144	0.00154526	1.23035	0.701433	0.619529	0.247682	0.294998	0.546483	0.710952	1.53061
-286.72	-1.23407	0.83621	-0.172678	0.758039	-0.0710532	0.315443	0.484159	0.0250242	0.668861	-0.229305	0.817668	0.310761	-0.00989968	0.0947604	1.27521	0.724692	0.636837	0.280526	0.282539	0.532504	0.675268	1.51662
-286.24	-1.15626	0.896179	-0.140132	0.76636	-0.046806	0.265019	0.523506	0.0356686	0.68222	-0.214935	0.783146	0.337305	0.0097036	0.164386	1.31419	0.76046	0.6494	0.30508	0.267891	0.519771	0.642749	1.49784
-285.76	-1.10103	0.947118	-0.10631	0.794131	-0.0240517	0.220463	0.564906	0.0435595	0.690174	-0.21136	0.797742	0.356173	0.0410884	0.207769	1.33799	0.801185	0.660368	0.320629	0.255435	0.506899	0.619041	1.47799
-285.28	-1.07027	0.98997	-0.0791156	0.850776	-0.000474408	0.208603	0.594554	0.0459823	0.698229	-0.216702	0.851179	0.366418	0.0710497	0.234159	1.34012	0.835722	0.673927	0.329635	0.247052	0.494	0.607508	1.45785
-284.8	-1.05733	1.02583	-0.0654241	0.932753	0.0230186	0.237011	0.605144	0.0436932	0.712351	-0.227431	0.910014	0.374291	0.0884157	0.256257	1.32007	0.856267	0.69092	0.336149	0.243825	0.481757	0.605455	1.43618
-284.32	-1.04784	1.06082	-0.0669126	1.03205	0.041118	0.295713	0.597906	0.040232	0.724368	-0.24173	0.941334	0.389165	0.0910748	0.28011	1.28742	0.859833	0.707165	0.33941	0.242282	0.474478	0.607679	1.41425
-283.84	-1.02716	1.09667	-0.0799286	1.13475	0.0485556	0.362443	0.58395	0.0378533	0.722103	-0.256771	0.93214	0.424599	0.0857734	0.3016	1.24968	0.852316	0.717486	0.337307	0.238588	0.476035	0.60902	1.39419
-283.36	-0.990035	1.13258	-0.0962383	1.22637	0.0468267	0.415166	0.572328	0.0361929	0.696689	-0.269266	0.896358	0.484999	0.0811824	0.308915	1.21263	0.843087	0.71929	0.329159	0.228494	0.486383	0.611026	1.37988
-282.88	-0.945642	1.1657	-0.108484	1.3025	0.0420468	0.442833	0.569583	0.0338587	0.645721	-0.273395	0.858847	0.563733	0.0843462	0.297981	1.17358	0.836249	0.71695	0.317927	0.210181	0.50102	0.619411	1.37337
-282.4	-0.90337	1.19166	-0.110645	1.36732	0.043449	0.443684	0.572413	0.0319454	0.5849	-0.267186	0.833293	0.645954	0.093463	0.273998	1.12588	0.829643	0.719327	0.308298	0.186158	0.515346	0.640778	1.37155
-281.92	-0.876468	1.20721	-0.106462	1.4287	0.0541517	0.426408	0.571972	0.0322881	0.528851	-0.253288	0.815791	0.712361	0.106008	0.249715	1.06352	0.814992	0.736991	0.304661	0.162232	0.523251	0.67349	1.3732
-281.44	-0.872539	1.21736	-0.0993175	1.49047	0.0715832	0.399401	0.561245	0.0383803	0.491645	-0.235983	0.795652	0.754636	0.118129	0.237041	0.987905	0.785911	0.7737	0.307543	0.143286	0.525178	0.71054	1.37659
-280.96	-0.889831	1.23007	-0.0932476	1.54546	0.0882479	0.364715	0.538357	0.0517316	0.47579	-0.22365	0.765202	0.769876	0.130199	0.237836	0.905076	0.74489	0.823411	0.314023	0.131826	0.523346	0.743066	1.38066
-280.48	-0.926301	1.25701	-0.0880864	1.58267	0.097379	0.323249	0.505359	0.070999	0.477134	-0.221656	0.731956	0.766677	0.145326	0.245963	0.822728	0.702939	0.872668	0.32147	0.124945	0.5221	0.767364	1.38743
-280	-0.970357	1.2999	-0.0836773	1.59265	0.0960666	0.27785	0.47124	0.0904822	0.487759	-0.230894	0.709133	0.756711	0.16534	0.253163	0.749593	0.673292	0.908654	0.326467	0.118151	0.520381	0.785148	1.39738
-279.52	-1.01105	1.35113	-0.0786047	1.58316	0.089802	0.224789	0.444203	0.106545	0.502342	-0.248915	0.701712	0.755167	0.189835	0.255483	0.692421	0.66242	0.926564	0.329052	0.107205	0.514605	0.801262	1.40883
-279.04	-1.03783	1.39733	-0.0737373	1.56814	0.0855923	0.165951	0.434094	0.118121	0.524362	-0.271801	0.703363	0.77206	0.217094	0.254591	0.652022	0.665138	0.931098	0.327994	0.0916904	0.501844	0.819256	1.41869
-278.56	-1.04844	1.42688	-0.0715067	1.55969	0.087839	0.0995504	0.441339	0.126152	0.555777	-0.296753	0.697253	0.815407	0.244555	0.253657	0.629136	0.671138	0.933095	0.32389	0.0759154	0.482309	0.838096	1.4238
-278.08	-1.03924	1.43525	-0.0750199	1.56387	0.0977985	0.0317691	0.466492	0.133082	0.593874	-0.327012	0.670523	0.884926	0.268203	0.254383	0.617151	0.67139	0.942007	0.317798	0.0650748	0.460457	0.855632	1.42383
-277.6	-1.02031	1.43	-0.0867433	1.58247	0.108484	-0.0305843	0.504795	0.138617	0.633137	-0.363182	0.620418	0.976112	0.285529	0.255721	0.608399	0.664913	0.963095	0.312067	0.0616983	0.44112	0.872025	1.4219
-277.12	-0.992946	1.4232	-0.105381	1.61067	0.114213	-0.0869963	0.549513	0.139822	0.662695	-0.404138	0.55301	1.07534	0.295525	0.257425	0.594644	0.65766	0.99602	0.309861	0.063834	0.426569	0.887658	1.42249
-276.64	-0.967315	1.42233	-0.129483	1.63983	0.108744	-0.136894	0.594879	0.134526	0.676163	-0.44687	0.478845	1.16799	0.300521	0.260912	0.574224	0.659013	1.03918	0.311935	0.0665779	0.418537	0.907042	1.42624
-276.16	-0.946746	1.42871	-0.157408	1.66155	0.0911223	-0.187516	0.637635	0.12245	0.673536	-0.484342	0.403193	1.23829	0.305119	0.269516	0.549951	0.668346	1.0913	0.31474	0.06518	0.417403	0.932992	1.43193
-275.68	-0.935321	1.43817	-0.186332	1.66512	0.0668496	-0.245383	0.674366	0.10711	0.657792	-0.513853	0.324918	1.27935	0.313016	0.280809	0.528642	0.681558	1.14971	0.311253	0.0575006	0.423646	0.963814	1.43438
-275.2	-0.940739	1.44839	-0.216476	1.64634	0.0421736	-0.308662	0.701404	0.0938323	0.634738	-0.537024	0.239887	1.29152	0.324376	0.289014	0.515345	0.68951	1.21155	0.296679	0.0459916	0.437253	1.00037	1.42777
-274.72	-0.964315	1.46488	-0.245829	1.60326	0.022153	-0.375262	0.718152	0.0865439	0.601925	-0.558535	0.148438	1.28186	0.332779	0.285113	0.512827	0.690582	1.26967	0.270457	0.0331912	0.455682	1.04174	1.4106
-274.24	-1.00396	1.49587	-0.275817	1.54373	0.00557288	-0.438812	0.727367	0.0834842	0.547793	-0.578742	0.0511249	1.26054	0.330632	0.265675	0.516482	0.68542	1.31573	0.240442	0.0213832	0.475981	1.08467	1.38632
-273.76	-1.04141	1.54506	-0.305279	1.47827	-0.0117275	-0.498436	0.732291	0.0801099	0.465745	-0.593259	-0.0458762	1.23119	0.314545	0.235846	0.520769	0.682441	1.34461	0.216133	0.00844671	0.492049	1.12599	1.36319
-273.28	-1.0537	1.60699	-0.332245	1.42004	-0.0344768	-0.555647	0.734772	0.0703926	0.360384	-0.595905	-0.132816	1.19632	0.291077	0.207274	0.520164	0.685693	1.35442	0.203652	-0.00773438	0.502924	1.15902	1.35051
-272.8	-1.02448	1.66715	-0.355393	1.37251	-0.0661164	-0.612535	0.738592	0.0519302	0.242712	-0.585679	-0.20062	1.15886	0.272228	0.188105	0.511789	0.695051	1.34934	0.200341	-0.0251442	0.512276	1.17939	1.35215
-272.32	-0.952153	1.71151	-0.373028	1.33542	-0.101094	-0.675382	0.74099	0.0271195	0.131746	-0.565452	-0.237218	1.12278	0.266745	0.181233	0.496817	0.706239	1.33506	0.199039	-0.0377532	0.52549	1.18789	1.36674
-271.84	-0.855251	1.73413	-0.380707	1.30424	-0.134061	-0.742087	0.743302	0.00394225	0.0410594	-0.545736	-0.246889	1.09337	0.275198	0.18147	0.476129	0.713473	1.31737	0.192242	-0.0397269	0.545514	1.19124	1.38629
-271.36	-0.765103	1.73746	-0.373015	1.27406	-0.161296	-0.812039	0.744075	-0.0113565	-0.0250466	-0.531182	-0.243502	1.07219	0.288869	0.182119	0.453515	0.709336	1.30143	0.181123	-0.0292286	0.572446	1.20066	1.40301
-270.88	-0.696489	1.73546	-0.346796	1.24692	-0.184205	-0.883025	0.741964	-0.0168664	-0.0720248	-0.516632	-0.242393	1.05505	0.295782	0.179219	0.432833	0.694556	1.29173	0.171476	-0.0111636	0.601834	1.21776	1.41003
-270.4	-0.655098	1.73949	-0.304768	1.22717	-0.208161	-0.94964	0.731101	-0.016121	-0.102864	-0.488371	-0.255638	1.03833	0.288683	0.1732	0.417252	0.669732	1.29057	0.170588	0.00413983	0.629309	1.24013	1.40724
-269.92	-0.626297	1.75152	-0.253666	1.21347	-0.237642	-1.01219	0.707806	-0.0157234	-0.119192	-0.435183	-0.277926	1.01972	0.27055	0.164866	0.405716	0.637594	1.29527	0.181237	0.00668601	0.649339	1.25949	1.39755
-269.44	-0.596636	1.76441	-0.201364	1.2045	-0.273735	-1.07052	0.674048	-0.0206239	-0.116685	-0.354992	-0.29502	1.00442	0.247881	0.152138	0.396323	0.605341	1.29853	0.198792	-0.0077259	0.663428	1.27348	1.38552
-268.96	-0.559085	1.7681	-0.154293	1.19593	-0.313132	-1.13423	0.636821	-0.0310314	-0.0958003	-0.261186	-0.293892	0.999874	0.22746	0.132938	0.382137	0.580822	1.29067	0.217324	-0.034811	0.672788	1.28287	1.37339
-268.48	-0.520192	1.75672	-0.111509	1.18775	-0.352873	-1.21083	0.610518	-0.042506	-0.0653016	-0.169286	-0.272217	1.00584	0.210123	0.109534	0.363009	0.56952	1.26352	0.234192	-0.0660508	0.678503	1.29264	1.36261
-268	-0.490591	1.73219	-0.0695734	1.18214	-0.389584	-1.30259	0.60102	-0.0489215	-0.0394318	-0.0949319	-0.238368	1.0125	0.194157	0.0863733	0.339899	0.571985	1.21736	0.251303	-0.0943634	0.68266	1.30673	1.35241
-267.52	-0.478149	1.70257	-0.0273167	1.17593	-0.419306	-1.40018	0.610116	-0.0458909	-0.023755	-0.035422	-0.201165	1.00305	0.177947	0.0724856	0.318494	0.58301	1.16014	0.27192	-0.118039	0.682199	1.31968	1.34121
-267.04	-0.480836	1.67441	0.0167188	1.16751	-0.438237	-1.48832	0.628013	-0.0319811	-0.0128086	0.0193642	-0.162954	0.965803	0.162038	0.0730048	0.302423	0.591702	1.10413	0.296818	-0.138448	0.679346	1.32382	1.32894
-266.56	-0.485396	1.65173	0.0566173	1.14927	-0.444057	-1.54699	0.642995	-0.00930629	0.00664447	0.0810176	-0.111369	0.90371	0.151235	0.0859928	0.290098	0.588935	1.057	0.32039	-0.1604	0.675682	1.31381	1.31534
-266.08	-0.481372	1.6354	0.0853133	1.12037	-0.437394	-1.57314	0.65184	0.017663	0.0472531	0.156132	-0.0370671	0.836245	0.147204	0.105564	0.273131	0.57406	1.02065	0.336298	-0.184682	0.674212	1.29234	1.30191
-265.6	-0.463202	1.62461	0.1023	1.08551	-0.424796	-1.57281	0.658383	0.0439338	0.104904	0.241881	0.0566662	0.783356	0.146788	0.125353	0.247778	0.555264	0.991289	0.343476	-0.212493	0.677013	1.26695	1.28946
-265.12	-0.439751	1.61876	0.110125	1.05113	-0.414891	-1.55553	0.673352	0.0640306	0.166815	0.323517	0.146998	0.755373	0.142288	0.143421	0.214727	0.545986	0.96392	0.34595	-0.242086	0.684867	1.24453	1.27976
-264.64	-0.429358	1.61767	0.11661	1.03013	-0.415331	-1.52334	0.701263	0.0753039	0.213806	0.389003	0.20824	0.743687	0.127989	0.160513	0.182656	0.556437	0.936875	0.350984	-0.273467	0.698215	1.22945	1.27319
-264.16	-0.448683	1.62108	0.128086	1.02213	-0.428058	-1.46885	0.735492	0.0792176	0.238884	0.428895	0.231082	0.730572	0.102562	0.178672	0.161128	0.585073	0.910663	0.361654	-0.307054	0.716133	1.21694	1.26985
-263.68	-0.49952	1.62625	0.148005	1.01728	-0.446143	-1.38503	0.76277	0.0807241	0.252658	0.444792	0.230373	0.705355	0.0714047	0.19813	0.15552	0.623019	0.886871	0.3743	-0.342792	0.73681	1.20493	1.26748
-263.2	-0.569463	1.63084	0.17299	1.00517	-0.463162	-1.27135	0.770263	0.0855613	0.274374	0.445722	0.235013	0.669608	0.0405906	0.217372	0.163714	0.658948	0.863033	0.378132	-0.380536	0.758819	1.19522	1.26527
-262.72	-0.636443	1.63732	0.198264	0.978107	-0.473138	-1.14271	0.7545	0.0992492	0.315329	0.444277	0.268101	0.634737	0.0167268	0.238037	0.174382	0.682982	0.836085	0.36577	-0.417178	0.778096	1.18834	1.26368
-262.24	-0.679376	1.64416	0.215726	0.937272	-0.474891	-1.02738	0.72655	0.122243	0.373906	0.451377	0.329481	0.614334	0.000268194	0.262935	0.178417	0.693503	0.805757	0.336043	-0.450772	0.790831	1.18608	1.26742
-261.76	-0.687271	1.6531	0.222947	0.89126	-0.471009	-0.939363	0.700061	0.151805	0.429519	0.471084	0.393228	0.613429	-0.0109072	0.293709	0.171103	0.691399	0.776447	0.299528	-0.480144	0.795286	1.19222	1.28126
-261.28	-0.665319	1.65997	0.220588	0.849603	-0.464745	-0.881474	0.684888	0.183073	0.462266	0.499091	0.434604	0.625224	-0.0200783	0.327975	0.154689	0.682475	0.756177	0.267074	-0.504645	0.791499	1.20532	1.30547
-260.8	-0.627836	1.66261	0.214908	0.8106	-0.456207	-0.836998	0.679526	0.211735	0.468788	0.52618	0.439278	0.638851	-0.0296296	0.35937	0.134608	0.668087	0.751619	0.244842	-0.527017	0.783411	1.22504	1.33718
-260.32	-0.589918	1.66182	0.212316	0.771126	-0.446605	-0.798363	0.671279	0.233995	0.454075	0.543297	0.41645	0.649599	-0.0401018	0.382831	0.117971	0.65096	0.763669	0.22975	-0.549478	0.774393	1.2523	1.36675
-259.84	-0.558388	1.66033	0.216895	0.725064	-0.435623	-0.765934	0.650404	0.247624	0.436291	0.545984	0.379447	0.657099	-0.0487158	0.398353	0.106297	0.630566	0.785954	0.213822	-0.573178	0.768141	1.28417	1.38576
-259.36	-0.535713	1.66534	0.226082	0.675287	-0.423559	-0.750653	0.61464	0.25121	0.426104	0.536864	0.337509	0.670753	-0.0495437	0.413953	0.103174	0.610073	0.809089	0.19207	-0.597421	0.764991	1.31841	1.38975
-258.88	-0.520603	1.68347	0.232075	0.635609	-0.412332	-0.763988	0.573316	0.244406	0.422319	0.521294	0.282069	0.69279	-0.0374504	0.437647	0.107426	0.590237	0.827937	0.166054	-0.619579	0.764167	1.3472	1.38099
-258.4	-0.510657	1.71412	0.225007	0.619379	-0.400641	-0.804463	0.543626	0.230944	0.418123	0.502988	0.202466	0.722338	-0.0109384	0.470545	0.11727	0.570311	0.839973	0.140192	-0.635233	0.763872	1.3652	1.36646
-257.92	-0.503434	1.75214	0.20093	0.629039	-0.386271	-0.859747	0.541489	0.217957	0.402318	0.484382	0.0997366	0.750445	0.0433584	0.508538	0.130382	0.546977	0.847459	0.120063	-0.642373	0.763258	1.37167	1.35144
-257.44	-0.498502	1.78823	0.163169	0.650967	-0.370131	-0.919238	0.568433	0.211769	0.370827	0.463908	-0.00657748	0.765961	0.0735309	0.537407	0.140933	0.519621	0.850049	0.104437	-0.640818	0.761919	1.37494	1.33905
-256.96	-0.493099	1.81898	0.118778	0.660897	-0.354096	-0.974749	0.613186	0.214554	0.328698	0.440535	-0.0913204	0.764258	0.0860729	0.548494	0.142061	0.486561	0.846206	0.0908754	-0.627174	0.759269	1.38662	1.32931
-256.48	-0.482482	1.84199	0.078472	0.647601	-0.345352	-1.02079	0.658638	0.222819	0.281071	0.41806	-0.139003	0.749351	0.0761652	0.541311	0.130552	0.448352	0.832753	0.0772188	-0.622554	0.753748	1.41281	1.32082
-256	-0.467529	1.85946	0.0475964	0.611245	-0.34718	-1.06242	0.689047	0.228965	0.231471	0.398676	-0.163554	0.730145	0.0471044	0.52335	0.107557	0.410745	0.809303	0.066185	-0.619001	0.743158	1.45108	1.31718
-255.52	-0.452154	1.87047	0.0258491	0.569677	-0.359707	-1.088	0.698936	0.226753	0.179571	0.388564	-0.190389	0.714934	0.0105263	0.506104	0.0803319	0.376432	0.777545	0.0621045	-0.615352	0.727593	1.49024	1.3207
-255.04	-0.440051	1.89761	0.00702943	0.540788	-0.378451	-1.08388	0.691194	0.215357	0.128202	0.38572	-0.238529	0.703963	-0.0219325	0.497094	0.0550793	0.349966	0.740737	0.0667314	-0.606805	0.710307	1.51867	1.33198
-254.56	-0.442666	1.87807	-0.0129506	0.537161	-0.396375	-1.04937	0.679501	0.19958	0.0771657	0.389866	-0.306859	0.69563	-0.0429486	0.496637	0.0413051	0.32824	0.701183	0.0758837	-0.591842	0.696297	1.53005	1.34691
-254.08	-0.462991	1.83842	-0.0360681	0.55112	-0.407013	-0.992985	0.670845	0.185158	0.0292674	0.40054	-0.377242	0.683238	-0.0503131	0.500766	0.0382225	0.307845	0.659925	0.08261	-0.57194	0.68942	1.52381	1.35416
-253.6	-0.498497	1.79342	-0.0604896	0.57345	-0.412334	-0.936649	0.667004	0.175799	-0.0132618	0.420378	-0.436062	0.664311	-0.0455101	0.500454	0.0426933	0.285883	0.618423	0.0817145	-0.551939	0.689384	1.50685	1.3481
-253.12	-0.545516	1.76305	-0.0829049	0.59566	-0.417	-0.904643	0.662895	0.171852	-0.0491868	0.452629	-0.480177	0.636089	-0.0309749	0.491572	0.0464875	0.260717	0.581162	0.0752071	-0.537114	0.693599	1.48561	1.32854
-252.64	-0.593653	1.76007	-0.0981151	0.618605	-0.427791	-0.905065	0.650842	0.170038	-0.0772266	0.499877	-0.511329	0.595876	-0.00968749	0.476037	0.0455544	0.229854	0.554637	0.0667871	-0.530358	0.695553	1.46335	1.3041
-252.16	-0.632997	1.7791	-0.103199	0.652744	-0.444856	-0.929017	0.632584	0.166998	-0.0973085	0.560418	-0.528306	0.546675	0.0140774	0.45961	0.0401813	0.193628	0.542163	0.0630363	-0.529117	0.693772	1.44104	1.2851
-251.68	-0.659319	1.80378	-0.0964818	0.700293	-0.462788	-0.96572	0.618109	0.160847	-0.114356	0.627955	-0.514424	0.489193	0.0343208	0.450469	0.0367468	0.152529	0.544561	0.0654233	-0.528846	0.688353	1.41763	1.27726
-251.2	-0.673547	1.81343	-0.0756042	0.755835	-0.474122	-0.999604	0.617183	0.151432	-0.130641	0.696577	-0.458185	0.426927	0.0456615	0.451003	0.0411945	0.111364	0.556757	0.0706531	-0.525643	0.682137	1.39119	1.27799
-250.72	-0.680234	1.79654	-0.0401953	0.809169	-0.471824	-1.03081	0.639445	0.140462	-0.156561	0.763584	-0.363547	0.365357	0.0453854	0.461125	0.0559323	0.075886	0.56968	0.0756366	-0.51997	0.676045	1.36556	1.28203
-250.24	-0.690047	1.75783	0.00918063	0.849741	-0.457454	-1.06122	0.680407	0.129353	-0.20114	0.83222	-0.258848	0.309899	0.0339093	0.472825	0.0762562	0.0540468	0.577262	0.0810929	-0.515533	0.671926	1.34258	1.28252
-249.76	-0.710998	1.71095	0.0691035	0.877731	-0.438437	-1.0892	0.727677	0.120255	-0.268639	0.904072	-0.16462	0.267931	0.0144155	0.478416	0.0919758	0.0509413	0.575175	0.0893545	-0.516672	0.670332	1.32605	1.27724
-249.28	-0.746918	1.66711	0.133705	0.901896	-0.423072	-1.1224	0.763831	0.11552	-0.35168	0.97452	-0.0887982	0.245892	-0.00962315	0.473447	0.095561	0.0644493	0.564211	0.102572	-0.524908	0.672993	1.31442	1.2665
-248.8	-0.796203	1.63176	0.194754	0.933979	-0.42036	-1.15332	0.782626	0.11541	-0.441569	1.0342	-0.0110928	0.242308	-0.0341773	0.459847	0.0845575	0.0866503	0.547024	0.117562	-0.537933	0.67856	1.30487	1.25362
-248.32	-0.849226	1.60065	0.246528	0.979262	-0.43302	-1.18495	0.788494	0.118641	-0.526712	1.07367	0.0874906	0.250443	-0.0566918	0.441254	0.0645326	0.107362	0.528646	0.130562	-0.552772	0.682652	1.29435	1.24043
-247.84	-0.896933	1.57086	0.2823	1.03833	-0.459398	-1.21778	0.796116	0.121952	-0.604389	1.08972	0.196805	0.25992	-0.0735412	0.421426	0.0425248	0.122296	0.516237	0.138125	-0.568033	0.680398	1.2795	1.22954
-247.36	-0.930621	1.54206	0.301664	1.09688	-0.494649	-1.24208	0.816777	0.123234	-0.674637	1.0889	0.282605	0.261997	-0.0821341	0.400091	0.0242201	0.128101	0.517636	0.141205	-0.585552	0.670423	1.2599	1.2228
-246.88	-0.94798	1.51193	0.306114	1.14318	-0.534986	-1.25832	0.850409	0.122535	-0.738855	1.08181	0.320087	0.255581	-0.0836252	0.377717	0.00758674	0.128544	0.536448	0.143548	-0.606317	0.657965	1.23955	1.22143
-246.4	-0.961422	1.48331	0.298783	1.16657	-0.575618	-1.25554	0.885117	0.122292	-0.799365	1.07347	0.335973	0.245796	-0.0828047	0.356471	-0.00736003	0.128208	0.569688	0.149305	-0.630614	0.651129	1.22261	1.22601
-245.92	-0.983245	1.45424	0.283907	1.16474	-0.611623	-1.23715	0.906117	0.124785	-0.852073	1.05814	0.398585	0.239636	-0.0858932	0.340174	-0.0216888	0.127783	0.604579	0.158054	-0.653014	0.65379	1.21265	1.23442
-245.44	-1.01834	1.42155	0.266274	1.13543	-0.633939	-1.20653	0.90471	0.129956	-0.895123	1.02735	0.562545	0.23909	-0.0947017	0.334047	-0.0301883	0.126619	0.627105	0.164819	-0.668172	0.660166	1.20976	1.24507
-244.96	-1.05959	1.38506	0.244936	1.08279	-0.638842	-1.17552	0.885857	0.134143	-0.928955	0.977628	0.808773	0.237229	-0.107827	0.336355	-0.0306401	0.125629	0.632175	0.16593	-0.673266	0.659173	1.21169	1.25374
-244.48	-1.09317	1.34818	0.220486	1.01222	-0.626789	-1.14184	0.86126	0.133669	-0.957793	0.918988	1.03149	0.22307	-0.120619	0.338576	-0.0225428	0.127806	0.626751	0.16077	-0.669412	0.645755	1.21183	1.2596
-244	-1.1069	1.31634	0.192657	0.935725	-0.607794	-1.09835	0.844178	0.126049	-0.985321	0.869177	1.10533	0.189276	-0.130271	0.328264	-0.0126017	0.138614	0.62883	0.150782	-0.660656	0.630406	1.20587	1.26466
-243.52	-1.09776	1.29151	0.166677	0.868097	-0.594714	-1.03335	0.837676	0.113148	-1.01327	0.844023	0.97331	0.140076	-0.139736	0.300836	-0.00744031	0.160696	0.654311	0.137953	-0.649419	0.635723	1.18871	1.27155
-243.04	-1.07985	1.26874	0.146219	0.823855	-0.59439	-0.933711	0.835425	0.100262	-1.04293	0.843575	0.695516	0.0893249	-0.155298	0.261491	-0.010592	0.193494	0.706618	0.119691	-0.634699	0.678433	1.16123	1.28412
-242.56	-1.06971	1.24051	0.138108	0.809228	-0.606732	-0.806315	0.827848	0.0908847	-1.07111	0.854028	0.40753	0.0497243	-0.180836	0.228634	-0.0181266	0.232261	0.771171	0.0923589	-0.61563	0.755714	1.12377	1.30176
-242.08	-1.07542	1.19974	0.146068	0.829268	-0.623774	-0.672206	0.813234	0.0843317	-1.09266	0.855878	0.230543	0.026388	-0.21409	0.217946	-0.0238667	0.267442	0.827619	0.0541382	-0.592963	0.838695	1.07998	1.32083
-241.6	-1.09034	1.14829	0.170988	0.876342	-0.638972	-0.563829	0.798719	0.0782548	-1.10492	0.837591	0.18907	0.014006	-0.245286	0.226277	-0.0227755	0.289925	0.861101	0.0108531	-0.573047	0.89171	1.03471	1.33834
-241.12	-1.09338	1.09602	0.21057	0.939321	-0.647002	-0.510768	0.79393	0.0704976	-1.10954	0.799549	0.212788	0.00573929	-0.264573	0.233859	-0.0142226	0.300377	0.873432	-0.0259753	-0.561832	0.891711	0.99036	1.35191
-240.64	-1.06734	1.0573	0.254375	1.00587	-0.648197	-0.52767	0.806448	0.0616695	-1.10728	0.751191	0.208829	9.57114e-05	-0.267025	0.21375	-0.00262084	0.301887	0.876495	-0.0472682	-0.56284	0.846258	0.950254	1.36218
-240.16	-1.00349	1.04121	0.294493	1.06658	-0.651512	-0.602293	0.834069	0.0560823	-1.10422	0.702959	0.135964	-0.000746051	-0.255916	0.147872	0.0094784	0.303633	0.885492	-0.0523011	-0.573218	0.786609	0.913831	1.37245
-239.68	-0.907935	1.0484	0.321246	1.11925	-0.659323	-0.710535	0.868553	0.0557073	-1.1057	0.664476	0.0215382	0.00941973	-0.237717	0.0436126	0.0203961	0.312344	0.906709	-0.0497297	-0.588166	0.742186	0.87954	1.38593
-239.2	-0.795214	1.06831	0.327985	1.16642	-0.672334	-0.815109	0.90015	0.0607927	-1.11391	0.636845	-0.070652	0.0343013	-0.218489	-0.0678867	0.0318696	0.331504	0.936986	-0.052186	-0.600932	0.725274	0.84753	1.40109
-238.72	-0.684656	1.08437	0.31193	1.21316	-0.686408	-0.890562	0.926223	0.0653826	-1.12412	0.618628	-0.106929	0.0691707	-0.199168	-0.149312	0.0460715	0.358191	0.967539	-0.0680616	-0.611705	0.726236	0.816693	1.41448
-238.24	-0.597222	1.07875	0.275923	1.26673	-0.698664	-0.923635	0.951079	0.0639271	-1.12951	0.605996	-0.104742	0.104168	-0.177805	-0.177842	0.0587694	0.390136	0.992735	-0.0965385	-0.621513	0.726475	0.788872	1.42221
-237.76	-0.548811	1.04347	0.227645	1.32252	-0.706432	-0.916104	0.978367	0.0548875	-1.12054	0.59201	-0.106759	0.136558	-0.152435	-0.156141	0.0657338	0.424724	1.01102	-0.130624	-0.629724	0.716136	0.763712	1.42181
-237.28	-0.54019	0.980185	0.173801	1.37797	-0.708609	-0.876433	1.00961	0.0412606	-1.09288	0.570939	-0.142168	0.168432	-0.125158	-0.108827	0.060608	0.459815	1.02314	-0.160858	-0.633251	0.698355	0.740788	1.41513
-236.8	-0.559477	0.900491	0.11996	1.42812	-0.703957	-0.820775	1.04385	0.0278891	-1.05427	0.538581	-0.202673	0.204705	-0.0982378	-0.0650095	0.0428596	0.497056	1.03007	-0.182435	-0.627782	0.686671	0.718456	1.40613
-236.32	-0.586778	0.821082	0.0663604	1.46322	-0.691601	-0.757541	1.07707	0.0171239	-1.01557	0.500398	-0.263224	0.244265	-0.0749435	-0.0428975	0.0172627	0.53583	1.03079	-0.193256	-0.612794	0.689153	0.696743	1.39995
-235.84	-0.595351	0.75548	0.01672	1.48051	-0.675563	-0.691676	1.10561	0.00882208	-0.987351	0.466679	-0.308875	0.279698	-0.0552973	-0.0411573	-0.0112126	0.574609	1.02489	-0.196011	-0.591291	0.706015	0.678618	1.39807
-235.36	-0.577865	0.711051	-0.0256206	1.48259	-0.662096	-0.619779	1.12794	0.000470408	-0.974198	0.445976	-0.347088	0.302289	-0.0400596	-0.0472639	-0.0369506	0.608616	1.01598	-0.193373	-0.570589	0.728073	0.662934	1.4003
-234.88	-0.545434	0.680533	-0.0579139	1.47301	-0.657246	-0.542462	1.14269	-0.0084685	-0.971785	0.440137	-0.394603	0.306865	-0.0291738	-0.0460367	-0.05911	0.631642	1.00923	-0.188212	-0.55564	0.746408	0.648741	1.40441
-234.4	-0.522379	0.648885	-0.0767148	1.45986	-0.664924	-0.453835	1.15266	-0.0156949	-0.965986	0.441555	-0.455195	0.296008	-0.023477	-0.0326951	-0.0789492	0.64196	1.00956	-0.181827	-0.546664	0.759469	0.634911	1.40914
-233.92	-0.52962	0.603375	-0.0845826	1.45377	-0.679999	-0.365371	1.15936	-0.0170983	-0.946087	0.439597	-0.509893	0.282482	-0.0218086	-0.013337	-0.0972392	0.639954	1.01401	-0.175244	-0.539639	0.769539	0.619841	1.4147
-233.44	-0.568463	0.540494	-0.0924737	1.46029	-0.696048	-0.289188	1.16412	-0.0114175	-0.907508	0.426359	-0.535616	0.274609	-0.0196227	-0.00088008	-0.113516	0.630059	1.01828	-0.165736	-0.531089	0.77734	0.605255	1.41903
-232.96	-0.61845	0.472085	-0.108599	1.48518	-0.707722	-0.240693	1.16944	-0.00164637	-0.853548	0.402425	-0.520021	0.278358	-0.0101959	-0.00419177	-0.123971	0.618197	1.01897	-0.150117	-0.521509	0.782586	0.591649	1.42272
-232.48	-0.664457	0.42213	-0.136943	1.52089	-0.713543	-0.230675	1.17547	0.00750374	-0.795619	0.378104	-0.476976	0.289188	0.0104179	-0.0240381	-0.127331	0.608406	1.01664	-0.125979	-0.513887	0.780948	0.580746	1.42349
-232	-0.697689	0.405725	-0.170417	1.55318	-0.716488	-0.265488	1.18025	0.0115609	-0.740558	0.3634	-0.428327	0.301929	0.0415588	-0.0543305	-0.123712	0.600692	1.01582	-0.0947543	-0.511387	0.769803	0.567414	1.41824
-231.52	-0.727085	0.425391	-0.19638	1.56268	-0.721195	-0.340117	1.18042	0.0104615	-0.689944	0.365829	-0.388818	0.313155	0.0765116	-0.0853748	-0.117707	0.595177	1.02141	-0.0625405	-0.511935	0.753529	0.544547	1.40688
-231.04	-0.764693	0.464022	-0.204524	1.53613	-0.731252	-0.442223	1.17177	0.0057452	-0.638829	0.385623	-0.357492	0.316106	0.107636	-0.109222	-0.115676	0.588673	1.03169	-0.0368421	-0.509275	0.736005	0.510671	1.39008
-230.56	-0.812477	0.494392	-0.192687	1.46982	-0.743184	-0.566343	1.15445	-0.000113834	-0.585585	0.416948	-0.323033	0.312082	0.130797	-0.12338	-0.123107	0.577703	1.04062	-0.0230166	-0.497647	0.722239	0.467847	1.36983
-230.08	-0.860416	0.496265	-0.169108	1.37862	-0.756183	-0.700575	1.12957	-0.00429206	-0.529205	0.448996	-0.273389	0.30465	0.146165	-0.131296	-0.140311	0.563727	1.04103	-0.0179696	-0.476172	0.71188	0.426164	1.34803
-229.6	-0.898021	0.46194	-0.146473	1.28436	-0.763756	-0.830227	1.10347	-0.00613217	-0.476425	0.470614	-0.215952	0.300296	0.154794	-0.137525	-0.165885	0.547836	1.03012	-0.0137075	-0.449278	0.701923	0.39624	1.3266
-229.12	-0.926942	0.401564	-0.133248	1.20358	-0.765065	-0.939097	1.07867	-0.00329662	-0.42725	0.473661	-0.16148	0.306873	0.158415	-0.142247	-0.195313	0.535788	1.01335	-0.00311775	-0.426143	0.689341	0.382174	1.30824
-228.64	-0.955286	0.336669	-0.128494	1.14097	-0.761772	-1.01592	1.05449	0.00554193	-0.373626	0.456325	-0.121242	0.327544	0.156873	-0.140632	-0.224762	0.530069	0.999428	0.0134574	-0.411158	0.673742	0.381603	1.29444
-228.16	-0.989738	0.28154	-0.126525	1.08854	-0.749204	-1.05361	1.03198	0.0202045	-0.304406	0.424527	-0.102505	0.35905	0.149076	-0.129578	-0.252831	0.530041	0.994629	0.0294999	-0.407857	0.65829	0.38556	1.28658
-227.68	-1.01997	0.241572	-0.124001	1.03429	-0.728944	-1.06383	1.01307	0.038033	-0.208619	0.389395	-0.0970785	0.390727	0.136323	-0.10609	-0.280199	0.531914	0.997943	0.0371204	-0.410211	0.645166	0.388023	1.28247
-227.2	-1.0212	0.211156	-0.115391	0.972461	-0.703715	-1.06599	1.00152	0.056052	-0.0894409	0.36454	-0.0981552	0.409322	0.122655	-0.0748717	-0.306261	0.528904	1.00095	0.0342499	-0.412603	0.633481	0.386884	1.27983
-226.72	-0.97189	0.180076	-0.101063	0.904627	-0.678991	-1.07318	1.00168	0.0715634	0.0387503	0.359723	-0.0948089	0.406468	0.11272	-0.0460187	-0.332819	0.518986	0.992903	0.026512	-0.409913	0.620442	0.38589	1.2752
-226.24	-0.873821	0.142827	-0.0786601	0.854042	-0.660672	-1.09294	1.01254	0.0843974	0.148575	0.373841	-0.0781702	0.385019	0.108019	-0.0300807	-0.36	0.505775	0.970043	0.0230916	-0.401245	0.605098	0.387621	1.26701
-225.76	-0.75249	0.0988377	-0.0450385	0.835052	-0.655203	-1.11834	1.02748	0.0951516	0.222254	0.401438	-0.0446614	0.353531	0.108591	-0.0319517	-0.388217	0.495721	0.936192	0.0269682	-0.389082	0.588407	0.392362	1.25863
-225.28	-0.64188	0.0537362	0.000130153	0.848695	-0.664399	-1.13813	1.03743	0.104702	0.253764	0.432791	0.00298489	0.324966	0.111706	-0.051231	-0.415443	0.500613	0.902429	0.034809	-0.376124	0.575101	0.394172	1.25309
-224.8	-0.565945	0.0174241	0.0480811	0.882211	-0.683782	-1.16018	1.03587	0.112666	0.253223	0.460347	0.0579193	0.304377	0.119707	-0.0820857	-0.440676	0.518435	0.878967	0.0386232	-0.364615	0.568282	0.388878	1.25274
-224.32	-0.514763	-0.00315245	0.0874761	0.911536	-0.71079	-1.19294	1.02364	0.117148	0.239169	0.479151	0.110438	0.289569	0.135586	-0.116517	-0.462557	0.545152	0.866327	0.0343059	-0.353817	0.566987	0.378685	1.25651
-223.84	-0.469268	-0.00414507	0.107101	0.920359	-0.739272	-1.25018	1.00829	0.117851	0.222379	0.487601	0.154107	0.276401	0.158751	-0.143895	-0.479209	0.570037	0.858395	0.0262645	-0.344666	0.565994	0.366052	1.25844
-223.36	-0.410099	0.00921387	0.105569	0.895495	-0.769585	-1.31872	0.996115	0.115653	0.20306	0.488243	0.187738	0.261856	0.186832	-0.15664	-0.490909	0.585253	0.845175	0.0224478	-0.336733	0.558604	0.358688	1.2519
-222.88	-0.336719	0.0303637	0.0912692	0.84613	-0.798796	-1.36403	0.989993	0.113985	0.175505	0.482273	0.210526	0.248341	0.212674	-0.146088	-0.500291	0.589876	0.823837	0.0296036	-0.331153	0.543106	0.361343	1.23344
-222.4	-0.264904	0.0510559	0.0777156	0.78644	-0.827727	-1.34009	0.985893	0.116654	0.135231	0.474587	0.222808	0.23916	0.229014	-0.109666	-0.510492	0.586893	0.798212	0.0463153	-0.328343	0.523	0.375597	1.20535
-221.92	-0.207618	0.0689039	0.07289	0.732063	-0.855053	-1.22167	0.975494	0.126691	0.0888627	0.467998	0.223397	0.235812	0.232632	-0.0557542	-0.523264	0.584446	0.776649	0.0640168	-0.329967	0.50201	0.396953	1.1758
-221.44	-0.162286	0.0863934	0.0820676	0.696562	-0.880912	-1.02287	0.953189	0.143859	0.0417001	0.46383	0.217464	0.234421	0.225615	0.0023715	-0.53727	0.587311	0.764262	0.0715656	-0.335674	0.484006	0.418282	1.15094
-220.96	-0.111461	0.10742	0.0983493	0.680483	-0.908347	-0.797432	0.915249	0.166072	-0.00117503	0.46025	0.21332	0.225532	0.212126	0.0465596	-0.548758	0.594497	0.758775	0.0631373	-0.344014	0.469591	0.436805	1.13375
-220.48	-0.0406644	0.133255	0.116827	0.677143	-0.936693	-0.602825	0.86228	0.188465	-0.0437938	0.453241	0.223158	0.203513	0.19628	0.067444	-0.552642	0.604527	0.751234	0.0421324	-0.351393	0.45598	0.449597	1.12048
-220	0.050973	0.15814	0.136462	0.672665	-0.965081	-0.463344	0.799297	0.205222	-0.0920158	0.440449	0.253496	0.165361	0.181166	0.0675782	-0.547146	0.618888	0.734656	0.017561	-0.357232	0.440768	0.453707	1.10672
-219.52	0.140743	0.175548	0.158882	0.652511	-0.990731	-0.367493	0.731676	0.213366	-0.150193	0.422445	0.301148	0.115195	0.16872	0.0605685	-0.533961	0.641351	0.709182	-0.00390582	-0.358876	0.423697	0.450141	1.08884
-219.04	0.208422	0.185379	0.190135	0.612523	-1.00714	-0.276799	0.666494	0.212888	-0.213074	0.400722	0.35077	0.0589116	0.162973	0.0621365	-0.517637	0.678065	0.682292	-0.0200193	-0.35473	0.406292	0.435027	1.067
-218.56	0.243904	0.191581	0.234449	0.553464	-1.01254	-0.160642	0.605611	0.207782	-0.265593	0.377005	0.385608	0.00329068	0.167521	0.0793666	-0.498566	0.728344	0.662987	-0.0333696	-0.342406	0.389031	0.412288	1.04602
-218.08	0.25265	0.202135	0.289509	0.490227	-1.00652	-0.0174164	0.550369	0.202804	-0.292247	0.351535	0.395872	-0.0482838	0.184539	0.107324	-0.477544	0.783264	0.655515	-0.0507374	-0.323078	0.371284	0.386958	1.02774
-217.6	0.259008	0.221861	0.351741	0.435939	-0.996193	0.124821	0.501434	0.201041	-0.286919	0.322796	0.383624	-0.0924009	0.212372	0.134604	-0.45316	0.83228	0.655731	-0.0749259	-0.299898	0.351328	0.36641	1.01389
-217.12	0.285796	0.242255	0.417922	0.401342	-0.987953	0.236762	0.45838	0.200237	-0.255862	0.292567	0.362015	-0.125013	0.244397	0.154199	-0.424349	0.866001	0.655488	-0.105584	-0.277165	0.330365	0.35639	1.00151
-216.64	0.340889	0.255031	0.483348	0.382439	-0.987249	0.312775	0.416771	0.196066	-0.214465	0.26562	0.345421	-0.135261	0.273792	0.165041	-0.393923	0.885425	0.6491	-0.141099	-0.260799	0.310448	0.361031	0.989834
-216.16	0.411919	0.254782	0.545197	0.369848	-0.995252	0.372277	0.370312	0.18507	-0.178463	0.252569	0.337711	-0.117643	0.296123	0.172762	-0.366856	0.895141	0.637183	-0.177533	-0.252871	0.295713	0.372427	0.978964
-215.68	0.47994	0.247704	0.601253	0.351555	-1.00996	0.445177	0.314243	0.167843	-0.154773	0.261092	0.33558	-0.0732788	0.312087	0.179074	-0.349306	0.90008	0.62462	-0.212453	-0.25221	0.287802	0.381286	0.970383
-215.2	0.526576	0.248003	0.650581	0.322392	-1.031	0.544026	0.25302	0.149908	-0.142276	0.288514	0.331689	-0.0146427	0.3262	0.181627	-0.344996	0.902971	0.615179	-0.244222	-0.253733	0.286144	0.377134	0.965154
-214.72	0.546361	0.269034	0.696607	0.283592	-1.06116	0.656811	0.201942	0.13827	-0.134289	0.326605	0.323806	0.0410925	0.34229	0.17422	-0.356815	0.89981	0.607355	-0.2709	-0.253453	0.289535	0.363547	0.961472
-214.24	0.54136	0.314073	0.740594	0.237821	-1.10622	0.745318	0.178567	0.135102	-0.129051	0.364213	0.317062	0.0778719	0.362441	0.154428	-0.382719	0.885216	0.595627	-0.292411	-0.248045	0.296827	0.351919	0.95861
-213.76	0.520205	0.374444	0.784294	0.183836	-1.1673	0.776975	0.18812	0.139411	-0.130317	0.396431	0.316609	0.0941546	0.385701	0.130384	-0.417099	0.861999	0.573613	-0.309747	-0.239204	0.30674	0.358438	0.954562
-213.28	0.492032	0.434147	0.825768	0.119526	-1.24059	0.739656	0.216364	0.145812	-0.146136	0.42819	0.333524	0.0988142	0.408002	0.112602	-0.453002	0.837572	0.540157	-0.32572	-0.229089	0.318404	0.393913	0.9494
-212.8	0.467677	0.481401	0.85998	0.0495973	-1.31734	0.645787	0.236604	0.150326	-0.179031	0.471139	0.369982	0.107749	0.424341	0.109555	-0.484161	0.817874	0.499615	-0.341786	-0.219457	0.32875	0.45742	0.947318
-212.32	0.453189	0.514508	0.878174	-0.0132335	-1.38758	0.513019	0.229364	0.151679	-0.227315	0.53041	0.415988	0.131621	0.432562	0.116111	-0.509785	0.80195	0.459832	-0.356622	-0.211191	0.335378	0.536083	0.951
-211.84	0.455724	0.536044	0.879477	-0.0546199	-1.44878	0.367799	0.202231	0.152081	-0.278294	0.596588	0.457077	0.173491	0.430939	0.120956	-0.531637	0.780631	0.426588	-0.369696	-0.20515	0.334814	0.607824	0.960209
-211.36	0.473874	0.552871	0.866016	-0.0692807	-1.49819	0.236004	0.188523	0.153667	-0.314878	0.650957	0.479417	0.223041	0.422278	0.112828	-0.553589	0.74243	0.401133	-0.379358	-0.199829	0.329711	0.66224	0.971888
-210.88	0.499591	0.569731	0.848184	-0.0692722	-1.53691	0.128535	0.224482	0.156635	-0.330682	0.676502	0.475109	0.267279	0.411445	0.0927059	-0.577781	0.68539	0.378587	-0.388872	-0.195174	0.324645	0.69731	0.983146
-210.4	0.518395	0.590475	0.839864	-0.0690971	-1.56526	0.0584058	0.316368	0.158213	-0.321489	0.669894	0.444965	0.297647	0.403314	0.0739127	-0.599048	0.620484	0.351741	-0.402286	-0.189751	0.321137	0.722594	0.992701
-209.92	0.520152	0.616659	0.846842	-0.0872875	-1.58055	0.0216383	0.429443	0.15629	-0.289256	0.645474	0.396137	0.311346	0.399304	0.0711483	-0.611571	0.567641	0.316532	-0.424301	-0.182045	0.320259	0.746226	1.00186
-209.44	0.496887	0.647911	0.86823	-0.123909	-1.58018	0.00294033	0.504582	0.149512	-0.23696	0.625617	0.334799	0.309695	0.400062	0.0862359	-0.608212	0.539315	0.273235	-0.455086	-0.171815	0.318378	0.775775	1.01254
-208.96	0.454661	0.682875	0.893109	-0.16844	-1.56941	-0.0188443	0.500788	0.138804	-0.175079	0.625533	0.265386	0.299595	0.401009	0.1084	-0.587949	0.538242	0.226484	-0.491023	-0.161264	0.313418	0.808186	1.02622
-208.48	0.40633	0.71723	0.910368	-0.202246	-1.55939	-0.0593455	0.420796	0.127512	-0.115262	0.643269	0.190445	0.286294	0.398041	0.11937	-0.556686	0.553178	0.182999	-0.526436	-0.153794	0.304027	0.836779	1.04048
-208	0.361547	0.743402	0.912308	-0.220394	-1.56106	-0.120886	0.312537	0.119734	-0.0708068	0.662836	0.111607	0.276184	0.390056	0.109787	-0.524742	0.566782	0.148472	-0.558403	-0.152024	0.294547	0.853283	1.05212
-207.52	0.321031	0.75333	0.903616	-0.234641	-1.58136	-0.192397	0.230362	0.1186	-0.0512366	0.667985	0.0351728	0.275322	0.380903	0.0861515	-0.49735	0.566537	0.126217	-0.587026	-0.157092	0.287691	0.858215	1.05837
-207.04	0.281371	0.741591	0.893587	-0.261833	-1.61783	-0.258995	0.199275	0.12515	-0.0522437	0.65351	-0.0307085	0.287773	0.376166	0.0648542	-0.476644	0.554476	0.117062	-0.615042	-0.165706	0.285988	0.852391	1.05947
-206.56	0.234569	0.709945	0.886364	-0.310491	-1.66524	-0.320786	0.202781	0.136404	-0.0613513	0.633992	-0.0777862	0.3147	0.380099	0.057856	-0.459414	0.536806	0.119496	-0.644325	-0.172922	0.287993	0.841106	1.05766
-206.08	0.178196	0.666205	0.882896	-0.378035	-1.71757	-0.392826	0.20284	0.146063	-0.0616095	0.63057	-0.099577	0.348011	0.391428	0.064689	-0.443047	0.52061	0.129134	-0.672499	-0.175469	0.291091	0.826276	1.05653
-205.6	0.117755	0.619508	0.879101	-0.445651	-1.77362	-0.491999	0.173592	0.147282	-0.0428694	0.660717	-0.0961316	0.374866	0.40532	0.0709992	-0.42447	0.507625	0.142922	-0.696246	-0.173621	0.294762	0.809873	1.05834
-205.12	0.0651596	0.57734	0.871409	-0.495986	-1.83225	-0.625018	0.119858	0.136245	-0.0140133	0.721702	-0.0706033	0.3851	0.417245	0.0643979	-0.406141	0.492695	0.155717	-0.710907	-0.17026	0.301053	0.796962	1.0635
-204.64	0.0248061	0.542491	0.865089	-0.52079	-1.89218	-0.777232	0.06751	0.114141	0.0121722	0.795166	-0.0357418	0.374382	0.425024	0.0415995	-0.391462	0.473081	0.164728	-0.718543	-0.168999	0.312101	0.788921	1.07145
-204.16	-0.0041466	0.513559	0.86858	-0.527891	-1.94385	-0.925017	0.0414625	0.0883727	0.0192368	0.860017	-0.00890546	0.349263	0.43248	0.01323	-0.383399	0.448365	0.168123	-0.722478	-0.172531	0.329395	0.786747	1.07963
-203.68	-0.0341552	0.48596	0.885102	-0.535646	-1.97886	-1.04198	0.046724	0.0696293	0.00723593	0.898633	-0.00120943	0.323559	0.444976	-0.00467451	-0.381811	0.420385	0.165991	-0.726472	-0.180668	0.347895	0.788254	1.08702
-203.2	-0.0738755	0.459802	0.908469	-0.548962	-1.99182	-1.11791	0.0661773	0.065006	-0.0191474	0.907337	-0.0197718	0.309009	0.465833	-0.00387538	-0.388181	0.39636	0.159875	-0.732841	-0.193321	0.362171	0.788774	1.09384
-202.72	-0.127275	0.432443	0.929521	-0.56455	-1.98421	-1.15698	0.0770089	0.0758105	-0.0429809	0.898331	-0.0542544	0.310723	0.494232	0.0123479	-0.401452	0.382231	0.152414	-0.739547	-0.20935	0.354979	0.779856	1.10163
-202.24	-0.189076	0.405689	0.939083	-0.566518	-1.96719	-1.16401	0.0682481	0.0960644	-0.0645795	0.884236	-0.0893562	0.32403	0.524333	0.03113	-0.423682	0.378865	0.145435	-0.742839	-0.226944	0.355288	0.758804	1.11049
-201.76	-0.254574	0.377579	0.9404	-0.546669	-1.95214	-1.14957	0.0412205	0.11692	-0.091332	0.872597	-0.110476	0.341207	0.546195	0.0459686	-0.451499	0.384678	0.139012	-0.740951	-0.243336	0.354765	0.727046	1.12135
-201.28	-0.317145	0.345167	0.944713	-0.508942	-1.94463	-1.12246	0.00678586	0.130036	-0.132648	0.862485	-0.119849	0.351388	0.553477	0.0570556	-0.481892	0.393385	0.132743	-0.736203	-0.255807	0.358738	0.689299	1.13266
-200.8	-0.385751	0.307963	0.964326	-0.465043	-1.94277	-1.0981	-0.0309042	0.136189	-0.187595	0.847295	-0.130222	0.351471	0.543886	0.0723974	-0.5108	0.397654	0.127015	-0.732341	-0.261886	0.368022	0.651348	1.14194
-200.32	-0.45935	0.266779	0.999044	-0.426088	-1.9368	-1.08375	-0.0739314	0.137671	-0.24169	0.82255	-0.156742	0.343328	0.523721	0.0994583	-0.53303	0.390993	0.124429	-0.732992	-0.263309	0.381781	0.619575	1.14701
-199.84	-0.533295	0.224517	1.04027	-0.398061	-1.91997	-1.07933	-0.126125	0.139907	-0.275734	0.788676	-0.199672	0.330558	0.503354	0.135831	-0.547188	0.370592	0.128686	-0.738854	-0.264602	0.396927	0.595337	1.14732
-199.36	-0.586767	0.184786	1.07604	-0.37707	-1.89152	-1.07851	-0.184093	0.147016	-0.279827	0.749832	-0.243769	0.31768	0.490308	0.169614	-0.553596	0.337727	0.143099	-0.747695	-0.269497	0.412844	0.57927	1.14456
-198.88	-0.599742	0.146916	1.09967	-0.351488	-1.86011	-1.0656	-0.23781	0.158178	-0.25649	0.71164	-0.273103	0.308526	0.488055	0.185029	-0.55717	0.300248	0.167244	-0.753499	-0.280672	0.430434	0.569337	1.15012
-198.4	-0.561449	0.110001	1.11675	-0.318113	-1.83578	-1.03772	-0.276136	0.169017	-0.224119	0.67564	-0.283345	0.303533	0.492196	0.174894	-0.562484	0.266699	0.196784	-0.751183	-0.296974	0.450291	0.568909	1.14689
-197.92	-0.485252	0.0749507	1.13489	-0.278303	-1.82565	-0.995482	-0.292437	0.174801	-0.20144	0.640556	-0.288142	0.299251	0.493023	0.143912	-0.569701	0.244446	0.224068	-0.739352	-0.315234	0.470683	0.577699	1.14477
-197.44	-0.402434	0.0424369	1.15837	-0.241555	-1.82932	-0.946654	-0.289199	0.174976	-0.197864	0.605808	-0.31031	0.295697	0.483884	0.104444	-0.577953	0.233505	0.244202	-0.721044	-0.33257	0.485943	0.596341	1.14359
-196.96	-0.34131	0.0161251	1.1827	-0.212064	-1.83547	-0.892197	-0.275605	0.172967	-0.205285	0.574014	-0.361577	0.290963	0.464422	0.0686904	-0.58311	0.233063	0.257097	-0.703077	-0.347921	0.492199	0.619411	1.1442
-196.48	-0.317819	-0.00390619	1.19975	-0.190696	-1.83293	-0.827978	-0.263303	0.174693	-0.208043	0.547237	-0.434486	0.287123	0.44005	0.0403725	-0.584035	0.236403	0.268897	-0.692339	-0.360196	0.488728	0.642618	1.1469
-196	-0.316879	-0.0192804	1.2018	-0.171558	-1.81292	-0.740547	-0.255643	0.183292	-0.198376	0.526567	-0.505187	0.28627	0.420885	0.0143834	-0.582406	0.239302	0.283878	-0.690448	-0.369201	0.482376	0.658962	1.15293
-195.52	-0.322471	-0.0355219	1.18821	-0.152149	-1.77584	-0.631324	-0.254019	0.196454	-0.174079	0.512016	-0.554242	0.286514	0.408761	-0.018907	-0.581899	0.236174	0.303262	-0.694306	-0.371929	0.479137	0.663897	1.15987
-195.04	-0.313187	-0.05194	1.16662	-0.133085	-1.72761	-0.508256	-0.256588	0.207309	-0.143529	0.503549	-0.573734	0.287853	0.401787	-0.0641074	-0.588468	0.224911	0.321753	-0.695291	-0.366819	0.486968	0.657005	1.16609
-194.56	-0.289591	-0.0583241	1.1421	-0.119239	-1.67768	-0.38605	-0.258901	0.211444	-0.111219	0.502736	-0.568451	0.283929	0.395631	-0.115271	-0.604805	0.206133	0.331463	-0.687866	-0.354942	0.505653	0.640638	1.16823
-194.08	-0.263222	-0.0497214	1.12011	-0.11685	-1.63281	-0.269464	-0.259281	0.209177	-0.0756503	0.513438	-0.548628	0.269403	0.387084	-0.160721	-0.628316	0.183259	0.327017	-0.671785	-0.339392	0.531854	0.621731	1.16276
-193.6	-0.24645	-0.0192332	1.10382	-0.121746	-1.59653	-0.155739	-0.257223	0.205336	-0.0300033	0.538334	-0.524582	0.240594	0.377902	-0.18744	-0.654123	0.161799	0.311396	-0.65447	-0.325373	0.561125	0.604727	1.14993
-193.12	-0.240105	0.0252239	1.0954	-0.11998	-1.56991	-0.0305443	-0.253262	0.206417	0.0286382	0.57153	-0.502079	0.197642	0.371974	-0.186849	-0.677899	0.145239	0.295191	-0.644665	-0.318225	0.588648	0.594119	1.129
-192.64	-0.233795	0.066232	1.09496	-0.101461	-1.55161	0.105653	-0.248614	0.212665	0.0926982	0.600695	-0.490833	0.14633	0.37184	-0.156866	-0.6996	0.13852	0.289628	-0.647589	-0.319644	0.612256	0.586714	1.10129
-192.16	-0.215696	0.0896365	1.10033	-0.0623521	-1.54002	0.231048	-0.246159	0.218471	0.144242	0.615942	-0.498209	0.0952411	0.37516	-0.10033	-0.718729	0.138129	0.297703	-0.661998	-0.328351	0.630077	0.578011	1.06942
-191.68	-0.183197	0.0906613	1.1054	-0.0111664	-1.53367	0.320032	-0.246336	0.217049	0.167907	0.614912	-0.52553	0.0546187	0.377517	-0.0263823	-0.7383	0.139273	0.313519	-0.679633	-0.340664	0.640252	0.563544	1.03892
-191.2	-0.152691	0.0768763	1.10573	0.0365605	-1.52718	0.357839	-0.247006	0.20608	0.158246	0.607162	-0.562953	0.0300471	0.375236	0.0538374	-0.758533	0.13508	0.324315	-0.693701	-0.351356	0.643522	0.547433	1.0139
-190.72	-0.140743	0.0615651	1.10301	0.070755	-1.51649	0.344284	-0.249157	0.190438	0.127437	0.608672	-0.585698	0.0245823	0.368026	0.124912	-0.779436	0.121655	0.319909	-0.700545	-0.358231	0.640822	0.535713	0.996877
-190.24	-0.157561	0.0540565	1.09999	0.0955724	-1.49836	0.307795	-0.251373	0.179422	0.0920854	0.628349	-0.577387	0.0405076	0.36103	0.17369	-0.802404	0.10345	0.297836	-0.701953	-0.358313	0.635223	0.53549	0.987219
-189.76	-0.204479	0.0539147	1.09749	0.120928	-1.47225	0.273901	-0.254845	0.17981	0.0671811	0.66402	-0.536632	0.076442	0.360483	0.191106	-0.828281	0.0866896	0.266824	-0.702081	-0.352873	0.63023	0.544257	0.97974
-189.28	-0.266356	0.0529685	1.09334	0.154507	-1.44402	0.257474	-0.264496	0.191658	0.0584332	0.705149	-0.483272	0.127159	0.370672	0.181984	-0.857693	0.0786853	0.241074	-0.701872	-0.344488	0.626682	0.557737	0.969232
-188.8	-0.323387	0.0399591	1.07759	0.19459	-1.41612	0.247639	-0.283231	0.209067	0.0687392	0.736759	-0.450174	0.184106	0.390169	0.160882	-0.893016	0.0822423	0.232749	-0.699077	-0.33586	0.6243	0.564917	0.95098
-188.32	-0.363524	0.0128811	1.04452	0.233228	-1.39201	0.225762	-0.312362	0.224435	0.0989678	0.754664	-0.463751	0.238282	0.417209	0.148547	-0.929686	0.0978158	0.245577	-0.691901	-0.326506	0.623244	0.561535	0.929122
-187.84	-0.384096	-0.0222202	0.994815	0.25963	-1.37022	0.186824	-0.352681	0.234098	0.155255	0.760465	-0.526761	0.276009	0.448145	0.16033	-0.965715	0.123981	0.273863	-0.680077	-0.315216	0.625153	0.548541	0.90869
-187.36	-0.390609	-0.0600024	0.934787	0.268714	-1.34918	0.135899	-0.399446	0.240108	0.237038	0.760242	-0.616926	0.289762	0.480583	0.196454	-0.99973	0.158198	0.307597	-0.66776	-0.297537	0.629532	0.533429	0.896993
-186.88	-0.389862	-0.0949424	0.879962	0.262914	-1.32741	0.0939133	-0.44767	0.247946	0.335633	0.757532	-0.696059	0.281187	0.513315	0.244018	-1.03141	0.198668	0.337897	-0.661525	-0.270364	0.634961	0.522673	0.897645
-186.4	-0.385316	-0.123536	0.843379	0.253747	-1.30621	0.0795613	-0.490401	0.261283	0.428726	0.752669	-0.742243	0.264155	0.545874	0.284932	-1.05895	0.241917	0.36266	-0.665508	-0.236998	0.636172	0.51534	0.909168
-185.92	-0.377178	-0.144205	0.82621	0.248293	-1.28953	0.0905511	-0.524049	0.280101	0.489655	0.747078	-0.745255	0.252879	0.576664	0.304691	-1.08249	0.281439	0.385417	-0.678312	-0.201487	0.627786	0.509491	0.929807
-185.44	-0.362016	-0.153118	0.821442	0.252599	-1.27807	0.104913	-0.544121	0.300022	0.50884	0.742151	-0.721173	0.259825	0.604235	0.302509	-1.09908	0.313677	0.409274	-0.695581	-0.171267	0.608401	0.505689	0.956104
-184.96	-0.346663	-0.149839	0.817761	0.264506	-1.27257	0.0964388	-0.548041	0.315362	0.495774	0.739386	-0.694217	0.283232	0.62611	0.287467	-1.10693	0.339638	0.435081	-0.711971	-0.149299	0.58243	0.506695	0.98752
-184.48	-0.335531	-0.139775	0.80757	0.281977	-1.26987	0.0583271	-0.533166	0.321515	0.475273	0.736884	-0.682858	0.313028	0.642201	0.274758	-1.10716	0.361548	0.456756	-0.722346	-0.134602	0.559596	0.510722	1.01809
-184	-0.340349	-0.127512	0.791945	0.30097	-1.26624	0.00558614	-0.505271	0.317532	0.464952	0.725754	-0.689084	0.335096	0.652832	0.270552	-1.10342	0.386278	0.467008	-0.725021	-0.121195	0.548461	0.519553	1.0452
-183.52	-0.367311	-0.118323	0.7786	0.318103	-1.2562	-0.0256728	-0.473591	0.306552	0.472548	0.70114	-0.699709	0.344722	0.660968	0.273411	-1.09951	0.418978	0.460736	-0.721168	-0.103266	0.551607	0.524289	1.0634
-183.04	-0.4142	-0.113249	0.777199	0.336589	-1.23883	-0.00371911	-0.451115	0.293693	0.487171	0.666115	-0.698831	0.34661	0.669633	0.274429	-1.09638	0.455626	0.439137	-0.712169	-0.0802797	0.565892	0.522545	1.06908
-182.56	-0.467267	-0.104177	0.7934	0.361012	-1.21523	0.0743694	-0.446675	0.284468	0.497056	0.630149	-0.678944	0.352194	0.68154	0.266382	-1.09261	0.490584	0.408789	-0.700271	-0.0547467	0.582756	0.51423	1.06502
-182.08	-0.507931	-0.0866166	0.825715	0.395248	-1.18964	0.185318	-0.460822	0.282147	0.499232	0.605047	-0.648042	0.366526	0.698011	0.247976	-1.08497	0.517106	0.378383	-0.687619	-0.033198	0.592903	0.512073	1.05785
-181.6	-0.518549	-0.0599122	0.866824	0.43854	-1.16858	0.293174	-0.491625	0.286902	0.496374	0.592621	-0.622657	0.385065	0.718554	0.223968	-1.07031	0.529969	0.352908	-0.677518	-0.0208195	0.592233	0.52627	1.05375
-181.12	-0.490062	-0.0277073	0.907936	0.47979	-1.15335	0.366659	-0.525217	0.295146	0.495742	0.582089	-0.610979	0.395448	0.741369	0.202849	-1.04895	0.532517	0.331565	-0.670494	-0.0187498	0.579795	0.563052	1.05618
-180.64	-0.418849	-0.00206652	0.94225	0.504013	-1.14287	0.400854	-0.552262	0.30148	0.492158	0.560416	-0.619493	0.388742	0.763941	0.188956	-1.02199	0.534476	0.310194	-0.66689	-0.0235246	0.555924	0.616317	1.06192
-180.16	-0.309188	0.0135999	0.967905	0.499498	-1.13025	0.406854	-0.56445	0.301771	0.477088	0.522387	-0.637337	0.363043	0.785173	0.181744	-0.991295	0.545492	0.285417	-0.664985	-0.0291267	0.526851	0.671575	1.0655
-179.68	-0.178131	0.0183969	0.987344	0.468099	-1.10931	0.408538	-0.562057	0.294233	0.440645	0.475969	-0.653306	0.325579	0.804849	0.178211	-0.959198	0.567913	0.258126	-0.663823	-0.0321878	0.49806	0.715936	1.06339
-179.2	-0.0455616	0.0213349	1.00578	0.420946	-1.07805	0.424498	-0.548227	0.28072	0.38757	0.437316	-0.646069	0.285037	0.822135	0.176051	-0.925889	0.601946	0.235253	-0.6629	-0.0313025	0.474367	0.746026	1.05274
-178.72	0.0661659	0.0300774	1.02953	0.384071	-1.04083	0.472616	-0.529932	0.267203	0.335451	0.41447	-0.612157	0.245262	0.836289	0.179605	-0.892469	0.637402	0.227707	-0.662377	-0.0274554	0.4605	0.7629	1.03555
-178.24	0.139583	0.0511168	1.06279	0.376492	-1.00544	0.557623	-0.512875	0.260144	0.306423	0.406865	-0.561029	0.205073	0.845811	0.192955	-0.859239	0.663981	0.244427	-0.662261	-0.0217988	0.459036	0.772911	1.01629
-177.76	0.169598	0.0834218	1.10809	0.399344	-0.977262	0.679744	-0.499571	0.263772	0.310489	0.403165	-0.512814	0.160324	0.849198	0.219339	-0.828214	0.673345	0.287465	-0.662231	-0.0151079	0.46896	0.777976	0.997141
-177.28	0.158755	0.123035	1.16485	0.442969	-0.958605	0.824387	-0.489918	0.277636	0.336817	0.397213	-0.498497	0.113493	0.847182	0.254973	-0.801445	0.667676	0.350051	-0.66222	-0.00752467	0.486836	0.777355	0.979553
-176.8	0.121781	0.166358	1.22972	0.494412	-0.944245	0.974275	-0.479557	0.296476	0.360326	0.393187	-0.538663	0.0707733	0.841335	0.288066	-0.781029	0.653379	0.420474	-0.662066	0.00191908	0.506695	0.771491	0.964548
-176.32	0.0805167	0.209622	1.29453	0.545318	-0.930485	1.11607	-0.468171	0.313831	0.361086	0.405442	-0.629309	0.0398628	0.835249	0.305207	-0.769323	0.642212	0.485342	-0.663758	0.0112049	0.523094	0.765105	0.950431
-175.84	0.051806	0.249666	1.3529	0.590212	-0.914205	1.2563	-0.451089	0.323955	0.3334	0.444291	-0.749608	0.0241314	0.831961	0.299689	-0.765995	0.642019	0.535116	-0.66615	0.0167014	0.531541	0.768588	0.935661
-175.36	0.0390197	0.286331	1.40218	0.632371	-0.896414	1.42051	-0.428027	0.324527	0.292002	0.504598	-0.86435	0.0197799	0.831301	0.276421	-0.766418	0.65299	0.567099	-0.667405	0.0158676	0.529294	0.788585	0.920309
-174.88	0.0409519	0.319092	1.43985	0.675125	-0.877735	1.62816	-0.398199	0.318859	0.25908	0.568169	-0.948403	0.0178235	0.831952	0.247664	-0.763266	0.668861	0.583524	-0.662225	0.00470472	0.518035	0.826978	0.902587
-174.4	0.042749	0.347835	1.46883	0.715375	-0.858781	1.87586	-0.364816	0.311355	0.246439	0.614475	-0.998003	0.0097067	0.830988	0.227669	-0.754547	0.678655	0.5894	-0.647677	-0.0157763	0.501564	0.875818	0.88358
-173.92	0.0312716	0.376853	1.48855	0.749956	-0.839353	2.12666	-0.330953	0.304668	0.247193	0.633941	-1.03586	-0.00808264	0.827633	0.222108	-0.739813	0.673796	0.589128	-0.623091	-0.0418658	0.487042	0.923106	0.863371
-173.44	-0.00172541	0.407851	1.50286	0.774883	-0.823693	2.33236	-0.297937	0.299335	0.236937	0.633757	-1.08281	-0.0333593	0.824204	0.226743	-0.725084	0.65378	0.585089	-0.592818	-0.068248	0.477973	0.956599	0.843384
-172.96	-0.04739	0.445841	1.5143	0.785015	-0.818696	2.45741	-0.267302	0.294463	0.196413	0.630242	-1.14867	-0.0605269	0.825974	0.229808	-0.714021	0.626278	0.579245	-0.564074	-0.0879277	0.47618	0.969997	0.822725
-172.48	-0.0888314	0.484601	1.52905	0.775132	-0.831203	2.50813	-0.23852	0.290644	0.128277	0.636538	-1.22488	-0.0848147	0.83714	0.221024	-0.705508	0.601892	0.575359	-0.541207	-0.0953757	0.477992	0.965649	0.802758
-172	-0.102031	0.520605	1.55145	0.74438	-0.862541	2.52078	-0.209807	0.289674	0.0544533	0.653634	-1.29112	-0.104891	0.856319	0.195709	-0.697232	0.589126	0.576118	-0.52437	-0.089141	0.479796	0.949027	0.783387
-171.52	-0.0651228	0.547523	1.58118	0.698581	-0.906596	2.52509	-0.180956	0.292032	0.00289657	0.672902	-1.33507	-0.121822	0.874975	0.154398	-0.684524	0.588914	0.584391	-0.511159	-0.0714643	0.479958	0.928253	0.766953
-171.04	0.0320653	0.563741	1.61559	0.649379	-0.948533	2.52841	-0.153618	0.296619	-0.0102696	0.684359	-1.36739	-0.141137	0.884534	0.117961	-0.67168	0.597954	0.6014	-0.496174	-0.0477621	0.478912	0.911506	0.754162
-170.56	0.184501	0.570749	1.64299	0.616165	-0.975966	2.50613	-0.133513	0.299809	0.00664996	0.687079	-1.39694	-0.166904	0.880383	0.0876482	-0.664008	0.609689	0.623555	-0.478225	-0.0260797	0.478529	0.901639	0.742583
-170.08	0.371475	0.57669	1.6535	0.611157	-0.986796	2.43257	-0.123518	0.300126	0.0288915	0.686638	-1.4363	-0.199583	0.86496	0.0679753	-0.666459	0.618257	0.648495	-0.459138	-0.0115938	0.478747	0.901241	0.729709
-169.6	0.566906	0.583724	1.64395	0.635173	-0.987829	2.30722	-0.123663	0.298256	0.0364504	0.691067	-1.48635	-0.238846	0.847518	0.0569839	-0.67733	0.621831	0.671822	-0.441698	-0.006387	0.477079	0.908398	0.714066
-169.12	0.745176	0.59411	1.61821	0.67573	-0.989187	2.15635	-0.131522	0.299332	0.0262883	0.701324	-1.53687	-0.279555	0.83853	0.0507993	-0.684676	0.624238	0.691299	-0.428176	-0.00803776	0.470667	0.920321	0.695923
-168.64	0.885253	0.609259	1.58609	0.712489	-0.996549	2.02376	-0.143336	0.307373	0.0181736	0.709898	-1.5751	-0.318485	0.841773	0.0449491	-0.681527	0.627493	0.705902	-0.419117	-0.0116138	0.459186	0.933876	0.680738
-168.16	0.977617	0.626917	1.55632	0.725732	-1.00662	1.92853	-0.15717	0.322462	0.032487	0.70437	-1.59419	-0.352089	0.853703	0.0387372	-0.66482	0.633674	0.716292	-0.411962	-0.0121445	0.443217	0.948341	0.67557
-167.68	1.02187	0.651663	1.53046	0.704832	-1.00918	1.85773	-0.17418	0.338872	0.076516	0.675223	-1.59047	-0.376909	0.866138	0.0318192	-0.643205	0.642681	0.723363	-0.402226	-0.00756351	0.426993	0.963371	0.680289
-167.2	1.02815	0.681039	1.50281	0.653523	-0.997739	1.78438	-0.197448	0.349532	0.142915	0.627953	-1.56488	-0.389542	0.873252	0.0251189	-0.62669	0.656458	0.728603	-0.386811	0.0022596	0.412059	0.978762	0.691459
-166.72	1.00856	0.708767	1.46699	0.587059	-0.974047	1.68987	-0.222937	0.350616	0.212987	0.572865	-1.51059	-0.388762	0.872815	0.0182092	-0.621197	0.678935	0.733047	-0.365109	0.0152582	0.399569	0.99471	0.700197
-166.24	0.973085	0.729931	1.42053	0.52569	-0.947356	1.57903	-0.247624	0.344155	0.275787	0.525217	-1.42512	-0.374334	0.871358	0.0105353	-0.623459	0.709664	0.735282	-0.336592	0.0266152	0.388384	1.01271	0.696871
-165.76	0.926597	0.744964	1.36737	0.485822	-0.925123	1.47159	-0.263155	0.337033	0.332751	0.496899	-1.31304	-0.350569	0.874561	0.0026121	-0.624551	0.747267	0.732362	-0.305064	0.0341685	0.379433	1.03345	0.682327
-165.28	0.866888	0.758234	1.31548	0.478829	-0.907757	1.38162	-0.266276	0.335321	0.385104	0.48931	-1.18759	-0.320927	0.883512	-0.00340496	-0.618394	0.788597	0.723794	-0.270928	0.0341478	0.371248	1.05871	0.663257
-164.8	0.796263	0.784018	1.27524	0.501677	-0.889748	1.31154	-0.259603	0.341038	0.426735	0.498984	-1.0668	-0.284529	0.894314	-0.00352619	-0.607146	0.83024	0.709872	-0.234683	0.027402	0.366561	1.09135	0.649422
-164.32	0.722564	0.83448	1.24899	0.547331	-0.865356	1.2536	-0.250887	0.35241	0.443991	0.517876	-0.968752	-0.239077	0.902337	0.00645223	-0.596636	0.869794	0.692331	-0.19652	0.0162581	0.366439	1.13102	0.646962
-163.84	0.66686	0.908761	1.23658	0.599815	-0.832482	1.20196	-0.247693	0.365606	0.426154	0.54158	-0.899069	-0.179288	0.905384	0.0260261	-0.59343	0.904936	0.673699	-0.158707	0.00573002	0.367806	1.1726	0.654923
-163.36	0.649435	0.991488	1.23184	0.650429	-0.79665	1.16133	-0.251861	0.378871	0.375453	0.566832	-0.856544	-0.105263	0.907157	0.051872	-0.592847	0.9356	0.654936	-0.128402	-0.000681284	0.368738	1.21072	0.667514
-162.88	0.681864	1.06522	1.23234	0.702026	-0.765539	1.13628	-0.260057	0.392387	0.313173	0.592243	-0.83292	-0.0235892	0.913452	0.0750121	-0.587898	0.958373	0.635159	-0.111122	-0.000658358	0.368102	1.24215	0.6774
-162.4	0.757211	1.11428	1.23914	0.764623	-0.742949	1.12365	-0.26426	0.406633	0.267248	0.615041	-0.816509	0.0575621	0.927154	0.0872501	-0.571443	0.975471	0.613122	-0.110491	0.00432673	0.369614	1.26711	0.684668
-161.92	0.850197	1.14032	1.25397	0.847279	-0.724513	1.11317	-0.260636	0.419803	0.251466	0.633734	-0.798086	0.131695	0.945837	0.0832099	-0.540628	0.990212	0.588649	-0.123087	0.0105584	0.375202	1.28936	0.693702
-161.44	0.927051	1.15285	1.27675	0.955278	-0.704508	1.09125	-0.251658	0.428627	0.263702	0.64452	-0.764592	0.199263	0.962621	0.0648546	-0.499107	1.01114	0.563895	-0.138421	0.0146614	0.38647	1.316	0.709126
-160.96	0.963909	1.16381	1.30635	1.07792	-0.679935	1.04455	-0.244387	0.430271	0.278797	0.645266	-0.708222	0.267769	0.971093	0.0406125	-0.452001	1.04659	0.541252	-0.147693	0.0168607	0.399625	1.34995	0.72956
-160.48	0.956575	1.17506	1.33583	1.1938	-0.652574	0.975634	-0.244329	0.424718	0.280887	0.636793	-0.635149	0.338384	0.970581	0.0244104	-0.403228	1.09972	0.522231	-0.146355	0.0206295	0.412098	1.38568	0.749347
-160	0.916145	1.17997	1.36132	1.28255	-0.628269	0.88829	-0.252157	0.415202	0.267481	0.622157	-0.559045	0.409945	0.964772	0.0234174	-0.35407	1.16418	0.506535	-0.137485	0.0285072	0.418423	1.41594	0.759388
-159.52	0.859854	1.16708	1.38093	1.33194	-0.610373	0.787781	-0.264528	0.404074	0.249585	0.605927	-0.496914	0.472634	0.959192	0.039979	-0.305135	1.22318	0.4931	-0.126736	0.0418291	0.417266	1.43189	0.758314
-159.04	0.797431	1.14052	1.40223	1.33866	-0.599041	0.678622	-0.276093	0.3912	0.242503	0.590149	-0.465051	0.515223	0.957763	0.0635506	-0.259631	1.26047	0.47974	-0.118095	0.0565402	0.409927	1.43412	0.751925
-158.56	0.731642	1.11174	1.42816	1.3091	-0.590966	0.566806	-0.282883	0.373979	0.254156	0.575086	-0.471189	0.535492	0.961494	0.0805331	-0.220559	1.26558	0.467571	-0.109967	0.067506	0.3981	1.43038	0.750468
-158.08	0.659052	1.09833	1.46124	1.25561	-0.580699	0.466044	-0.286989	0.349593	0.276062	0.556592	-0.503536	0.539426	0.969581	0.0792291	-0.189141	1.24187	0.458189	-0.0984923	0.07288	0.383111	1.43114	0.761175
-157.6	0.586993	1.10625	1.50134	1.18503	-0.567066	0.393554	-0.291036	0.319773	0.29279	0.52781	-0.548531	0.537188	0.979628	0.0557096	-0.163622	1.20113	0.451822	-0.0838285	0.0758848	0.3673	1.44632	0.78326
-157.12	0.52479	1.13179	1.54293	1.11714	-0.546345	0.348861	-0.300932	0.290063	0.292948	0.486249	-0.590793	0.535927	0.987867	0.0125846	-0.143046	1.16154	0.449031	-0.0693529	0.0811368	0.351403	1.47458	0.808078
-156.64	0.487554	1.15973	1.58374	1.06715	-0.520016	0.327182	-0.316146	0.266634	0.272103	0.436082	-0.625147	0.534489	0.991275	-0.0414035	-0.125604	1.13607	0.449819	-0.0616543	0.0936023	0.337483	1.50784	0.824888
-156.16	0.487742	1.17683	1.62469	1.049	-0.489773	0.316883	-0.331361	0.254261	0.237697	0.387248	-0.649569	0.531639	0.984833	-0.0965628	-0.110068	1.13531	0.454297	-0.0641813	0.115047	0.326526	1.5303	0.828859
-155.68	0.5249	1.18115	1.67046	1.06273	-0.460403	0.314623	-0.338198	0.250921	0.192722	0.353961	-0.668529	0.524992	0.964369	-0.145106	-0.0949693	1.15967	0.462452	-0.076464	0.142851	0.319139	1.53662	0.820124
-155.2	0.585353	1.17948	1.72449	1.10082	-0.439134	0.33115	-0.330511	0.250302	0.14349	0.344015	-0.682148	0.516981	0.931733	-0.180677	-0.0746872	1.20697	0.475107	-0.0902594	0.173593	0.31316	1.52852	0.803896
-154.72	0.64663	1.1741	1.78203	1.14644	-0.428533	0.377412	-0.303694	0.246188	0.0941652	0.355033	-0.688419	0.51449	0.892739	-0.200755	-0.0450096	1.2686	0.492769	-0.0993739	0.202725	0.30903	1.52029	0.783136
-154.24	0.685031	1.17235	1.83549	1.18646	-0.428171	0.453809	-0.259328	0.236731	0.0553949	0.373892	-0.683324	0.522219	0.856908	-0.200913	-0.0018403	1.33375	0.514846	-0.101953	0.226534	0.307105	1.52313	0.759221
-153.76	0.684625	1.17043	1.87111	1.21957	-0.429786	0.535338	-0.202596	0.224398	0.0318542	0.386739	-0.666183	0.540708	0.832189	-0.181619	0.0537927	1.39095	0.539234	-0.101043	0.240408	0.30826	1.54194	0.732637
-153.28	0.650027	1.16724	1.88459	1.25328	-0.424191	0.587256	-0.139632	0.213879	0.0278977	0.386134	-0.637376	0.559495	0.821392	-0.142918	0.11499	1.43022	0.56276	-0.100683	0.24172	0.311502	1.56914	0.705242
-152.8	0.59195	1.16027	1.87504	1.29712	-0.40671	0.587794	-0.0736549	0.207668	0.0396686	0.375634	-0.596629	0.564696	0.820389	-0.0857202	0.175949	1.44613	0.580837	-0.100909	0.229948	0.317294	1.59338	0.682785
-152.32	0.531772	1.15471	1.84892	1.35174	-0.377522	0.550417	-0.00833699	0.204742	0.0590851	0.366578	-0.539841	0.544119	0.822188	-0.0107776	0.230418	1.43712	0.591248	-0.0986879	0.208201	0.323318	1.6055	0.668773
-151.84	0.486366	1.1531	1.81705	1.40354	-0.341004	0.513427	0.0539148	0.203179	0.0783762	0.37044	-0.467076	0.499738	0.820202	0.075126	0.276898	1.4054	0.595335	-0.0884548	0.18563	0.328408	1.60458	0.663023
-151.36	0.458708	1.15687	1.78817	1.44017	-0.299705	0.513752	0.112652	0.201276	0.0943792	0.391399	-0.381673	0.443396	0.813376	0.162435	0.318217	1.35602	0.599497	-0.0682973	0.169568	0.331326	1.59573	0.659097
-150.88	0.44126	1.16169	1.76593	1.45496	-0.25498	0.560822	0.168713	0.199219	0.107603	0.424033	-0.294838	0.394933	0.804745	0.240851	0.358235	1.29473	0.609822	-0.0408676	0.166131	0.334628	1.58655	0.650328
-150.4	0.423265	1.16639	1.7526	1.45352	-0.205178	0.633282	0.222129	0.199288	0.120838	0.457074	-0.224344	0.370861	0.79823	0.299107	0.399066	1.22477	0.630313	-0.0113048	0.177019	0.339776	1.5762	0.633756
-149.92	0.403712	1.1684	1.74677	1.44677	-0.153355	0.700308	0.271402	0.202979	0.13715	0.484497	-0.185559	0.374438	0.796398	0.332629	0.438787	1.15207	0.656854	0.0164444	0.201578	0.349011	1.55914	0.61383
-149.44	0.39585	1.17186	1.74425	1.44066	-0.105808	0.746458	0.31412	0.208335	0.156704	0.508773	-0.184041	0.400514	0.796126	0.344465	0.473502	1.08426	0.680579	0.0411229	0.237255	0.361897	1.53295	0.598008
-148.96	0.4205	1.17762	1.74079	1.43468	-0.0699642	0.79071	0.348471	0.213243	0.180497	0.537234	-0.21651	0.432656	0.791898	0.344384	0.497253	1.02566	0.693276	0.0616988	0.283509	0.375561	1.49716	0.592763
-148.48	0.495813	1.18479	1.72847	1.41739	-0.0451445	0.856644	0.370476	0.215402	0.212813	0.578089	-0.269974	0.456168	0.779408	0.342915	0.509247	0.981116	0.695598	0.0777119	0.338375	0.387778	1.45927	0.596562
-148	0.624505	1.19288	1.70534	1.38077	-0.0249344	0.95455	0.380654	0.215937	0.251826	0.634988	-0.331559	0.462567	0.759346	0.348366	0.510124	0.949877	0.696699	0.0856373	0.398243	0.396668	1.42724	0.602472
-147.52	0.792834	1.19978	1.6739	1.33251	0.000916894	1.06033	0.38317	0.217148	0.290285	0.701808	-0.397514	0.452382	0.737901	0.361433	0.506438	0.930764	0.707362	0.0820775	0.458318	0.404995	1.40705	0.600311
-147.04	0.977811	1.21159	1.6449	1.29159	0.0375587	1.14054	0.382867	0.221425	0.316318	0.771918	-0.468251	0.431832	0.721514	0.377828	0.503638	0.918219	0.735388	0.0691533	0.512143	0.416122	1.39951	0.586059
-146.56	1.15892	1.23574	1.63122	1.27802	0.0817692	1.17087	0.387684	0.229402	0.322532	0.840505	-0.54254	0.409917	0.712335	0.389606	0.502832	0.907113	0.775358	0.0536799	0.5559	0.435845	1.40456	0.562901
-146.08	1.32209	1.27562	1.64235	1.30516	0.122562	1.16779	0.398514	0.238418	0.311117	0.910302	-0.619941	0.397116	0.708212	0.387205	0.503581	0.894426	0.814766	0.0461348	0.588573	0.46493	1.4209	0.538728
-145.6	1.45696	1.32955	1.68054	1.36907	0.1519	1.16624	0.413723	0.24533	0.294647	0.987206	-0.68819	0.401608	0.704422	0.367505	0.503832	0.883035	0.841036	0.0549253	0.612783	0.502487	1.44563	0.5201
-145.12	1.55499	1.3867	1.73419	1.45363	0.169241	1.19394	0.431006	0.247271	0.288119	1.07178	-0.736568	0.428065	0.702372	0.332235	0.500507	0.876001	0.850113	0.0848027	0.632529	0.54384	1.47535	0.507468
-144.64	1.6075	1.43635	1.78399	1.53695	0.183254	1.24996	0.448315	0.245615	0.29224	1.15431	-0.759631	0.475805	0.706782	0.286313	0.49393	0.877139	0.847837	0.129271	0.652078	0.583413	1.50199	0.496349
-144.16	1.61467	1.47546	1.81579	1.60864	0.203245	1.30754	0.463456	0.243539	0.302381	1.21794	-0.760223	0.534115	0.725544	0.239843	0.485737	0.886261	0.844454	0.18036	0.673254	0.617229	1.51984	0.479235
-143.68	1.58419	1.50447	1.81944	1.66484	0.232873	1.34544	0.476511	0.244969	0.307116	1.24851	-0.752936	0.587985	0.761217	0.199869	0.475178	0.89749	0.846358	0.228161	0.694195	0.643165	1.52617	0.452735
-143.2	1.5329	1.53116	1.7978	1.7109	0.266672	1.35629	0.485483	0.253038	0.301241	1.24668	-0.750741	0.622438	0.808867	0.169211	0.466211	0.901802	0.855867	0.266925	0.710787	0.658545	1.52713	0.419821
-142.72	1.47588	1.55965	1.76337	1.74956	0.295859	1.36321	0.488366	0.267432	0.288566	1.23216	-0.754702	0.632051	0.859315	0.146392	0.462606	0.892432	0.869831	0.294308	0.721333	0.664761	1.53152	0.386735
-142.24	1.42613	1.59001	1.72943	1.77674	0.315069	1.38399	0.483378	0.284793	0.274923	1.22882	-0.752399	0.626842	0.903642	0.123767	0.469107	0.868757	0.887315	0.311542	0.728085	0.663864	1.54729	0.362104
-141.76	1.38144	1.61892	1.70395	1.7835	0.325636	1.41688	0.472317	0.302357	0.257642	1.25253	-0.729207	0.624287	0.942165	0.0960895	0.491022	0.837878	0.909387	0.318707	0.735559	0.661465	1.57326	0.346738
-141.28	1.33785	1.64616	1.69013	1.76053	0.335585	1.43528	0.458968	0.316312	0.232866	1.30079	-0.67557	0.643848	0.978418	0.0591079	0.527662	0.810073	0.93732	0.318257	0.747708	0.661268	1.59969	0.338284
-140.8	1.29143	1.67231	1.68348	1.70431	0.355242	1.42066	0.449587	0.327047	0.196912	1.35101	-0.597008	0.693563	1.01738	0.0142586	0.569697	0.791952	0.96843	0.313089	0.767021	0.665783	1.61235	0.328744
-140.32	1.242	1.70142	1.6784	1.62347	0.387042	1.36801	0.446444	0.335798	0.153957	1.37958	-0.509364	0.769451	1.05523	-0.033213	0.603519	0.784605	0.994328	0.307268	0.78958	0.673818	1.60134	0.314357
-139.84	1.19624	1.7301	1.67192	1.53122	0.428254	1.30529	0.451294	0.344973	0.113717	1.37277	-0.426524	0.85572	1.08169	-0.076921	0.616359	0.780911	1.0049	0.306406	0.810027	0.680811	1.56787	0.294914
-139.36	1.16692	1.75435	1.66104	1.44382	0.470746	1.25364	0.462622	0.355452	0.0877664	1.33687	-0.355237	0.933179	1.08554	-0.113524	0.607196	0.772027	0.995049	0.312957	0.821933	0.682745	1.52211	0.275005
-138.88	1.152	1.76909	1.64546	1.3742	0.510402	1.22462	0.477206	0.365324	0.074256	1.28649	-0.291588	0.988799	1.06448	-0.141817	0.581614	0.753935	0.969097	0.327158	0.82307	0.679653	1.47563	0.259387
-138.4	1.14976	1.77532	1.6267	1.32917	0.545116	1.20403	0.494963	0.37149	0.059241	1.23928	-0.231881	1.01473	1.02715	-0.166218	0.552731	0.730573	0.939712	0.346818	0.815724	0.674774	1.44116	0.251254
-137.92	1.15112	1.77733	1.60404	1.31151	0.577616	1.17649	0.51604	0.371579	0.027078	1.20091	-0.175005	1.01381	0.987162	-0.189281	0.530205	0.712091	0.920768	0.367943	0.803919	0.670828	1.42432	0.248232
-137.44	1.1466	1.78786	1.57793	1.31723	0.611314	1.1425	0.540352	0.367215	-0.0262033	1.16665	-0.124919	0.992602	0.955892	-0.211582	0.517218	0.704971	0.918418	0.387322	0.792387	0.670859	1.42437	0.24498
-136.96	1.12538	1.80986	1.54722	1.33838	0.648146	1.12976	0.564499	0.363487	-0.0876008	1.12757	-0.0825188	0.957358	0.937949	-0.229035	0.510995	0.711323	0.930799	0.403196	0.784012	0.675111	1.43666	0.238688
-136.48	1.08167	1.8405	1.51485	1.36787	0.684368	1.17118	0.581407	0.366103	-0.141325	1.08228	-0.0373914	0.913113	0.928921	-0.235413	0.505992	0.724985	0.950785	0.416479	0.778842	0.683	1.45267	0.230463
-136	1.01439	1.8688	1.48239	1.39659	0.716629	1.27764	0.589746	0.379805	-0.181981	1.0353	0.0234676	0.864917	0.921722	-0.229131	0.498463	0.7397	0.971864	0.427357	0.775389	0.693682	1.46543	0.225078
-135.52	0.933637	1.88969	1.45186	1.4172	0.741122	1.42077	0.590205	0.404341	-0.221051	0.993959	0.111574	0.817407	0.914793	-0.213361	0.490325	0.753673	0.99259	0.434998	0.772114	0.703614	1.47094	0.227835
-135.04	0.861043	1.90745	1.42085	1.4301	0.758238	1.5421	0.586044	0.437125	-0.27334	0.959444	0.218803	0.774786	0.908586	-0.196826	0.481735	0.768304	1.01149	0.439371	0.76913	0.713126	1.46923	0.240934
-134.56	0.819992	1.93782	1.3928	1.43731	0.771622	1.58725	0.584301	0.472783	-0.340791	0.929466	0.327316	0.735116	0.905501	-0.185175	0.473548	0.788989	1.02787	0.44096	0.767827	0.720812	1.46519	0.265156
-134.08	0.825831	1.99324	1.36934	1.44459	0.786447	1.53538	0.587803	0.507606	-0.402782	0.899604	0.415131	0.693958	0.905279	-0.17964	0.466384	0.813112	1.03549	0.442463	0.770979	0.726418	1.45926	0.296262
-133.6	0.876803	2.07828	1.35723	1.45375	0.804243	1.41093	0.596158	0.540107	-0.426681	0.869584	0.465345	0.647109	0.903268	-0.175475	0.461095	0.830873	1.03068	0.44661	0.779227	0.732371	1.45385	0.325805
-133.12	0.948452	2.18361	1.36127	1.46014	0.827015	1.26803	0.607641	0.5715	-0.387647	0.84405	0.482547	0.591112	0.892941	-0.168464	0.458635	0.830674	1.01288	0.455863	0.790844	0.739582	1.4461	0.350478
-132.64	1.0114	2.28711	1.38213	1.45085	0.85462	1.16463	0.618609	0.601118	-0.288859	0.829724	0.483053	0.532526	0.872525	-0.158055	0.459833	0.804632	0.986343	0.469792	0.802241	0.748639	1.42857	0.365681
-132.16	1.0434	2.36966	1.41493	1.41653	0.885485	1.11979	0.630967	0.627226	-0.154851	0.831303	0.48991	0.48609	0.847456	-0.145265	0.463149	0.755873	0.957407	0.4873	0.808879	0.75844	1.39991	0.371912
-131.68	1.04099	2.42161	1.44832	1.35964	0.919581	1.12661	0.650053	0.647755	-0.0211804	0.844708	0.513822	0.463535	0.826113	-0.131912	0.469928	0.694335	0.930631	0.50615	0.809076	0.767116	1.35764	0.374249
-131.2	1.01244	2.44382	1.46756	1.29321	0.957383	1.14818	0.682627	0.660551	0.0963223	0.862911	0.554215	0.471448	0.81577	-0.116793	0.477248	0.631483	0.90752	0.52708	0.80446	0.772852	1.30608	0.378295
-130.72	0.971274	2.4463	1.46232	1.23586	0.999986	1.15523	0.729921	0.66496	0.193632	0.88064	0.598552	0.501374	0.817504	-0.0951573	0.48602	0.578452	0.884961	0.551738	0.797599	0.773691	1.2489	0.388184
-130.24	0.936068	2.43976	1.43245	1.20373	1.0453	1.1439	0.788503	0.663164	0.279368	0.898321	0.633399	0.535497	0.824913	-0.0661921	0.495041	0.543846	0.862482	0.580291	0.790081	0.772465	1.18962	0.404443
-129.76	0.926361	2.43573	1.38475	1.19432	1.08874	1.1271	0.84948	0.659586	0.355109	0.924398	0.650989	0.557068	0.828156	-0.0345845	0.50284	0.529286	0.84146	0.611416	0.780978	0.77046	1.13521	0.423039
-129.28	0.960945	2.43931	1.3325	1.19394	1.12575	1.12857	0.902183	0.658091	0.417395	0.965688	0.646076	0.559027	0.81777	-0.00941515	0.50517	0.535269	0.825156	0.640699	0.767317	0.770775	1.08635	0.438443
-128.8	1.04919	2.45537	1.28338	1.18177	1.15508	1.15883	0.939084	0.66297	0.463429	1.08113	0.625026	0.543386	0.793594	0.00112237	0.499637	0.560114	0.814791	0.666051	0.748867	0.773201	1.04697	0.446811
-128.32	1.18263	2.48103	1.23952	1.14706	1.17808	1.20874	0.958184	0.676442	0.495114	1.14769	0.595339	0.522038	0.76382	-0.00260609	0.488849	0.596685	0.80836	0.688045	0.725491	0.778223	1.01874	0.451153
-127.84	1.33758	2.50932	1.19637	1.09376	1.20152	1.25663	0.963122	0.698971	0.527762	1.21654	0.569194	0.506037	0.74221	-0.0123358	0.47996	0.634506	0.803379	0.708124	0.699682	0.782939	0.998547	0.455388
-127.36	1.48303	2.52974	1.14828	1.03593	1.23052	1.28293	0.961357	0.727978	0.571265	1.27602	0.551243	0.49843	0.742449	-0.0154769	0.479385	0.663173	0.79875	0.727163	0.674005	0.785603	0.985413	0.462729
-126.88	1.59806	2.53609	1.09388	0.992469	1.26279	1.28322	0.957892	0.759321	0.623809	1.31976	0.545146	0.498755	0.770015	-0.00298482	0.491564	0.676561	0.796259	0.742997	0.650462	0.787619	0.977082	0.474171
-126.4	1.68337	2.53481	1.03771	0.972733	1.29177	1.25872	0.955078	0.787079	0.674576	1.34868	0.544929	0.504912	0.817805	0.0265475	0.516109	0.675435	0.798571	0.751745	0.628534	0.792848	0.974956	0.487894
-125.92	1.75529	2.53386	0.984936	0.97266	1.31303	1.22059	0.95337	0.806391	0.713024	1.36642	0.549946	0.518462	0.868909	0.0700263	0.548352	0.669585	0.80675	0.750748	0.608112	0.805353	0.978259	0.504023
-125.44	1.82737	2.54698	0.937493	0.984912	1.32786	1.16963	0.955639	0.816303	0.739957	1.38331	0.554243	0.549502	0.908803	0.123587	0.582033	0.668889	0.818563	0.742139	0.589079	0.826938	0.984252	0.524061
-124.96	1.89315	2.57798	0.894298	0.998218	1.34412	1.112	0.963759	0.818992	0.76948	1.40257	0.563743	0.604732	0.931191	0.186688	0.61485	0.679957	0.830647	0.730393	0.572228	0.856423	0.986367	0.552258
-124.48	1.9354	2.62008	0.849862	1.01139	1.36948	1.06637	0.977269	0.820184	0.821187	1.42775	0.584161	0.680836	0.942539	0.260377	0.645444	0.698998	0.843091	0.721843	0.55451	0.886694	0.976168	0.589983
-124	1.93184	2.66132	0.80098	1.03205	1.40912	1.0683	0.993139	0.824513	0.898559	1.45054	0.622723	0.762403	0.954289	0.342431	0.670886	0.720229	0.859235	0.720886	0.535951	0.910847	0.950768	0.633857
-123.52	1.88603	2.693	0.748907	1.06521	1.4568	1.14174	1.00613	0.833483	0.98492	1.46207	0.67974	0.831033	0.973933	0.425354	0.688174	0.734708	0.884095	0.728281	0.516839	0.92456	0.914628	0.676526
-123.04	1.82618	2.7175	0.699675	1.11449	1.50262	1.28753	1.01032	0.845496	1.05745	1.4531	0.747894	0.875393	0.998393	0.49859	0.693573	0.737267	0.91742	0.741665	0.498796	0.929135	0.876285	0.710815
-122.56	1.79264	2.73942	0.655392	1.17418	1.53836	1.46894	1.00646	0.857503	1.09532	1.41969	0.812467	0.899133	1.01588	0.552681	0.685947	0.730096	0.954296	0.758726	0.484774	0.929328	0.849212	0.731968
-122.08	1.80808	2.76153	0.614871	1.23566	1.56437	1.63131	1.00075	0.867633	1.09698	1.36608	0.863096	0.915671	1.01878	0.584192	0.670504	0.714813	0.983439	0.779256	0.477466	0.930753	0.837388	0.740451
-121.6	1.8687	2.77741	0.574528	1.29462	1.58811	1.72323	1.00273	0.876446	1.07811	1.30171	0.900772	0.93579	1.00721	0.59739	0.657178	0.696725	0.995629	0.803935	0.475734	0.93654	0.836729	0.739313
-121.12	1.93678	2.77608	0.530514	1.35054	1.61529	1.73271	1.0203	0.88654	1.05808	1.23808	0.93665	0.958899	0.989706	0.599798	0.652903	0.677821	0.989336	0.830893	0.478894	0.950726	0.837111	0.732149
-120.64	1.9747	2.74833	0.483138	1.4041	1.65075	1.68491	1.05387	0.899539	1.04207	1.18353	0.983482	0.972105	0.974639	0.598906	0.662199	0.659177	0.969903	0.856481	0.482708	0.970248	0.832376	0.722859
-120.16	1.95651	2.69885	0.434402	1.46038	1.69081	1.62663	1.09482	0.917304	1.02788	1.1418	1.04606	0.961465	0.963111	0.595976	0.678408	0.640122	0.948739	0.875868	0.486426	0.986893	0.824279	0.715118
-119.68	1.88193	2.63774	0.389222	1.51653	1.73033	1.59517	1.13274	0.938819	1.0087	1.11409	1.11528	0.92383	0.947207	0.587384	0.692305	0.621428	0.93488	0.887061	0.489801	1.00916	0.816477	0.712108
-119.2	1.76737	2.58422	0.349039	1.56704	1.77067	1.60237	1.15906	0.963077	0.985117	1.09571	1.17707	0.870476	0.918061	0.569057	0.700534	0.602805	0.931829	0.892513	0.493053	1.02617	0.815925	0.717281
-118.72	1.63903	2.55183	0.315107	1.60384	1.81192	1.6286	1.16937	0.987466	0.969717	1.08338	1.21924	0.826537	0.874625	0.539751	0.700627	0.585202	0.935659	0.895765	0.495887	1.03351	0.826135	0.730572
-118.24	1.5201	2.5472	0.285638	1.62608	1.87948	1.65662	1.16719	1.00872	0.978762	1.0726	1.24742	0.810613	0.826081	0.50318	0.697145	0.566323	0.93946	0.901414	0.496148	1.03065	0.847728	0.749831
-117.76	1.42427	2.56663	0.260328	1.63577	1.92263	1.66314	1.15607	1.02365	1.01972	1.05945	1.27581	0.828727	0.784429	0.470018	0.693058	0.545216	0.93854	0.908356	0.491832	1.02218	0.876324	0.774427
-117.28	1.35916	2.59469	0.23989	1.63822	1.95494	1.65324	1.14214	1.0293	1.08279	1.04481	1.31859	0.876327	0.756202	0.448055	0.688732	0.522036	0.932778	0.915355	0.481207	1.0111	0.902174	0.800869
-116.8	1.31821	2.62205	0.222485	1.63253	1.97091	1.63193	1.12973	1.02559	1.14982	1.03284	1.37619	0.936979	0.738311	0.441611	0.681083	0.500062	0.925593	0.918507	0.465554	1.00332	0.922118	0.827997
-116.32	1.28593	2.64066	0.209684	1.61383	1.97194	1.60985	1.12191	1.01648	1.20136	1.03111	1.43299	0.998871	0.725352	0.44651	0.666638	0.482692	0.921683	0.914869	0.447198	1.00203	0.937729	0.854702
-115.84	1.24484	2.64583	0.19781	1.58021	1.96892	1.58791	1.12127	1.00901	1.23116	1.0446	1.46632	1.05289	0.714152	0.455151	0.647286	0.479384	0.923967	0.900486	0.429185	1.00551	0.949077	0.88071
-115.36	1.18189	2.64063	0.184692	1.5435	1.97502	1.55749	1.12362	1.00939	1.23931	1.07362	1.46141	1.09539	0.707071	0.461156	0.632541	0.488339	0.930624	0.87342	0.414801	1.0133	0.959169	0.907031
-114.88	1.09826	2.62744	0.172578	1.51639	1.99445	1.50794	1.125	1.02011	1.23395	1.11168	1.42147	1.13024	0.709938	0.464398	0.632703	0.507522	0.938035	0.832057	0.404863	1.02618	0.965317	0.934682
-114.4	1.00959	2.61566	0.161894	1.52035	2.02225	1.43006	1.11818	1.03956	1.2197	1.1479	1.36461	1.1655	0.724995	0.467588	0.651215	0.525351	0.944359	0.779903	0.398715	1.04361	0.96429	0.963978
-113.92	0.937153	2.61296	0.154501	1.55681	2.04674	1.32549	1.09766	1.06253	1.19765	1.17717	1.3173	1.21162	0.749526	0.47301	0.684493	0.53673	0.950464	0.723478	0.394048	1.06545	0.950749	0.99516
-113.44	0.896522	2.621	0.148251	1.61051	2.05866	1.20588	1.0639	1.08465	1.16952	1.19997	1.2947	1.27604	0.774672	0.480173	0.72421	0.543375	0.958206	0.672604	0.389825	1.08884	0.924381	1.02819
-112.96	0.889973	2.63879	0.14332	1.65179	2.05854	1.08473	1.02178	1.10441	1.14129	1.22571	1.29908	1.35883	0.795243	0.48034	0.758331	0.551204	0.96872	0.633525	0.386315	1.11212	0.891858	1.06161
-112.48	0.897391	2.66132	0.13797	1.66098	2.05411	0.973889	0.974819	1.12331	1.11947	1.26492	1.32082	1.44751	0.810179	0.468223	0.784905	0.566885	0.976493	0.605104	0.385006	1.13489	0.865559	1.09514
-112	0.897449	2.68384	0.130118	1.63921	2.05914	0.887113	0.929507	1.14346	1.10713	1.32442	1.34543	1.52585	0.819825	0.443585	0.805324	0.594831	0.972626	0.581845	0.387496	1.15981	0.859535	1.12962
-111.52	0.881847	2.7045	0.11844	1.60408	2.07978	0.835573	0.892401	1.16537	1.10144	1.40038	1.36458	1.58153	0.82613	0.415605	0.822932	0.630477	0.949224	0.558225	0.393568	1.18859	0.877004	1.16159
-111.04	0.856896	2.72754	0.103988	1.57951	2.11105	0.819752	0.86703	1.18904	1.0932	1.48179	1.3767	1.60974	0.828775	0.396437	0.83921	0.665912	0.907233	0.534083	0.400341	1.22258	0.91229	1.18898
-110.56	0.839413	2.76076	0.0870474	1.56687	2.14165	0.834861	0.857651	1.21342	1.07237	1.55852	1.38899	1.6141	0.826895	0.392254	0.851836	0.692141	0.85784	0.515901	0.404628	1.25744	0.951337	1.20736
-110.08	0.844162	2.80346	0.0684841	1.55541	2.15927	0.863946	0.867652	1.23763	1.03871	1.62169	1.40985	1.59925	0.823324	0.401543	0.858171	0.703088	0.818238	0.510431	0.404485	1.28661	0.981029	1.21434
-109.6	0.873814	2.84844	0.0487324	1.52636	2.16238	0.878701	0.895389	1.26163	0.997036	1.67087	1.44355	1.56721	0.822563	0.414329	0.860563	0.696301	0.799863	0.518	0.400134	1.30234	1.00151	1.21038
-109.12	0.921764	2.88325	0.0237519	1.47254	2.15758	0.853159	0.934657	1.28482	0.958452	1.70758	1.49295	1.5165	0.827983	0.42265	0.865792	0.674838	0.801499	0.532459	0.393629	1.30304	1.02402	1.20175
-108.64	0.985982	2.89203	-0.00958409	1.40835	2.15824	0.772044	0.978451	1.30509	0.932409	1.7327	1.55327	1.44622	0.83802	0.422397	0.879116	0.646214	0.808385	0.541519	0.386124	1.29244	1.06358	1.19369
-108.16	1.06718	2.86814	-0.048078	1.35366	2.17029	0.642095	1.01759	1.3196	0.924074	1.74433	1.62805	1.3646	0.846575	0.415696	0.902071	0.618496	0.801269	0.539271	0.379487	1.27861	1.12888	1.19294
-107.68	1.16892	2.81394	-0.0848249	1.32966	2.19276	0.487675	1.0442	1.326	0.933638	1.73747	1.71341	1.28234	0.849182	0.406009	0.927109	0.597121	0.769791	0.5291	0.374147	1.2686	1.20997	1.19899
-107.2	1.28443	2.74383	-0.109625	1.33561	2.21895	0.348554	1.05453	1.32523	0.95575	1.71288	1.81538	1.20697	0.843818	0.393155	0.943818	0.590101	0.718846	0.523426	0.370514	1.26741	1.29062	1.21191
-106.72	1.39882	2.67659	-0.113155	1.35353	2.24073	0.256425	1.05	1.32047	0.977335	1.67847	1.93453	1.14284	0.833644	0.375132	0.941047	0.596093	0.665577	0.534426	0.368927	1.2766	1.35363	1.23051
-106.24	1.48545	2.62674	-0.0947286	1.36728	2.2574	0.223849	1.03196	1.31568	0.988806	1.64663	2.05877	1.08951	0.82393	0.347189	0.916538	0.608098	0.6237	0.565522	0.36847	1.29352	1.39531	1.255
-105.76	1.53409	2.60274	-0.0684037	1.3624	2.27376	0.243763	1.00612	1.31424	0.982614	1.6299	2.17719	1.04463	0.81989	0.311232	0.880258	0.619228	0.598897	0.610671	0.366881	1.31393	1.42021	1.28371
-105.28	1.54722	2.6035	-0.0487175	1.34334	2.29616	0.292757	0.975637	1.31507	0.96361	1.63066	2.27531	1.01115	0.822413	0.27392	0.844411	0.624034	0.582903	0.657698	0.364514	1.33342	1.44116	1.31572
-104.8	1.53533	2.61918	-0.0454957	1.32284	2.32457	0.342818	0.941911	1.31436	0.941941	1.6428	2.3494	0.991686	0.830888	0.24525	0.822371	0.623569	0.561524	0.695756	0.364063	1.35031	1.4615	1.34678
-104.32	1.51088	2.63491	-0.0606154	1.31107	2.35192	0.370332	0.909028	1.30883	0.93528	1.60251	2.40335	0.984359	0.84222	0.229939	0.822999	0.626151	0.526434	0.722178	0.367898	1.3633	1.48026	1.372
-103.84	1.48274	2.63887	-0.0827194	1.31391	2.36639	0.362183	0.879792	1.29667	0.948765	1.60482	2.45078	0.976005	0.854258	0.224667	0.843567	0.637186	0.478069	0.740742	0.378126	1.37291	1.4914	1.38721
-103.36	1.45487	2.62653	-0.0974215	1.33499	2.36247	0.320965	0.856771	1.28033	0.977087	1.61826	2.50493	0.952979	0.864643	0.217778	0.877258	0.656642	0.427188	0.75692	0.394823	1.37964	1.48985	1.39045
-102.88	1.43648	2.5978	-0.0968126	1.3742	2.34436	0.25959	0.839058	1.26292	1.01151	1.60857	2.56773	0.903632	0.869455	0.199542	0.918935	0.679931	0.383077	0.772741	0.412767	1.38305	1.47858	1.38429
-102.4	1.43986	2.5604	-0.0826575	1.42637	2.325	0.199693	0.825135	1.24658	1.03998	1.60825	2.63225	0.827878	0.86574	0.163507	0.963486	0.696526	0.349801	0.786346	0.426502	1.38381	1.46551	1.37258
-101.92	1.47143	2.52467	-0.065783	1.48624	2.3144	0.165411	0.81067	1.23101	1.0574	1.62412	2.69002	0.737022	0.853515	0.113344	1.01124	0.700457	0.323253	0.790671	0.432097	1.38416	1.45761	1.35861
-101.44	1.52809	2.49564	-0.0589312	1.54511	2.31876	0.170218	0.794035	1.21427	1.06638	1.6541	2.73614	0.64332	0.836025	0.0596815	1.06181	0.692453	0.295152	0.781437	0.431983	1.38285	1.45545	1.34626
-100.96	1.59435	2.47489	-0.065607	1.58444	2.33509	0.207612	0.776655	1.19609	1.067	1.68526	2.7736	0.554616	0.819781	0.0197708	1.1087	0.681747	0.260526	0.759999	0.430837	1.38136	1.45385	1.33791
-100.48	1.66015	2.46033	-0.0789182	1.59338	2.35338	0.256084	0.763379	1.17717	1.06432	1.70339	2.80307	0.475034	0.808306	0.00811769	1.14481	0.680424	0.218544	0.736203	0.435219	1.37916	1.44205	1.33548
-100	1.72783	2.44695	-0.0892247	1.57209	2.36672	0.283898	0.759531	1.15914	1.05923	1.70183	2.83475	0.410412	0.802347	0.0335739	1.16301	0.695738	0.17409	0.720901	0.447293	1.37552	1.41685	1.33911
-99.52	1.80818	2.43207	-0.0875248	1.5291	2.37269	0.277848	0.768408	1.14252	1.05822	1.67751	2.86987	0.367711	0.800166	0.0949029	1.16158	0.726631	0.133601	0.723211	0.466673	1.3716	1.38088	1.34854
-99.04	1.91446	2.41778	-0.0722956	1.47859	2.37108	0.23402	0.790167	1.12595	1.06667	1.63626	2.9133	0.355072	0.796366	0.179076	1.14475	0.768582	0.100415	0.74315	0.489087	1.36919	1.34135	1.36156
-98.56	2.03087	2.40828	-0.0491509	1.42738	2.36388	0.169112	0.823165	1.10734	1.08257	1.58673	2.96456	0.373214	0.787759	0.267109	1.12195	0.808545	0.0754853	0.770643	0.510057	1.37034	1.3051	1.37697
-98.08	2.13301	2.41019	-0.0240952	1.3849	2.35037	0.100978	0.865103	1.08602	1.09763	1.53842	3.01868	0.412558	0.772657	0.338333	1.101	0.83823	0.0571461	0.792693	0.527283	1.37698	1.27458	1.39404
-97.6	2.19191	2.42658	-0.00175931	1.3472	2.32995	0.0372628	0.912993	1.06457	1.10145	1.49948	3.07007	0.45673	0.750084	0.383101	1.08734	0.85095	0.0418777	0.799146	0.540754	1.38653	1.24604	1.41129
-97.12	2.19658	2.45603	0.0222738	1.31383	2.30362	-0.0255176	0.966464	1.04771	1.09197	1.4773	3.11234	0.488201	0.719614	0.402709	1.08136	0.848033	0.0282109	0.789982	0.54956	1.39645	1.20998	1.42715
-96.64	2.16307	2.49213	0.0556339	1.28409	2.27738	-0.0910154	1.02476	1.03856	1.0805	1.47557	3.13888	0.499896	0.680596	0.407341	1.08073	0.835986	0.0156215	0.76959	0.554722	1.40381	1.15945	1.44153
-96.16	2.1203	2.52742	0.101736	1.25828	2.25764	-0.156961	1.09079	1.0369	1.0852	1.49244	3.15127	0.497789	0.635248	0.406729	1.08141	0.824564	0.0031392	0.74708	0.555384	1.41002	1.09433	1.45261
-95.68	2.09656	2.55832	0.160123	1.23414	2.24819	-0.214778	1.16446	1.03911	1.12119	1.525	3.15606	0.493069	0.589229	0.403592	1.07813	0.822301	-0.00987203	0.726611	0.548612	1.41667	1.02029	1.46208
-95.2	2.10697	2.58931	0.222777	1.20323	2.2496	-0.256367	1.24486	1.04074	1.17713	1.56494	3.16333	0.49225	0.549194	0.394879	1.06465	0.834085	-0.0232722	0.70885	0.533482	1.42587	0.946372	1.47392
-94.72	2.15237	2.62832	0.282998	1.15737	2.25536	-0.290182	1.32762	1.03838	1.23377	1.60178	3.17911	0.493519	0.520778	0.37651	1.039	0.859888	-0.0369469	0.690509	0.509657	1.43628	0.880717	1.49085
-94.24	2.21903	2.68033	0.334626	1.10645	2.26022	-0.329794	1.40952	1.03101	1.26121	1.6263	3.20616	0.493305	0.504831	0.351208	1.00332	0.893851	-0.0480821	0.670501	0.479547	1.44737	0.824291	1.51527
-93.76	2.29077	2.74562	0.371979	1.05534	2.26051	-0.393799	1.48749	1.01984	1.25391	1.63059	3.24337	0.488014	0.49946	0.32811	0.966093	0.922929	-0.0524798	0.649197	0.447261	1.44945	0.775248	1.54243
-93.28	2.3487	2.81349	0.395693	1.02015	2.25562	-0.48741	1.56365	1.00793	1.22263	1.61423	3.28136	0.483171	0.500246	0.316916	0.937856	0.939221	-0.0467643	0.629331	0.417091	1.45743	0.727403	1.56523
-92.8	2.37889	2.86991	0.40692	1.00459	2.24897	-0.595771	1.64338	0.998879	1.18926	1.58494	3.30915	0.489185	0.504742	0.326814	0.921209	0.940453	-0.0299912	0.610197	0.390073	1.46698	0.676406	1.57723
-92.32	2.38113	2.90609	0.407462	1.00823	2.24175	-0.695146	1.73122	0.99601	1.16801	1.55732	3.32491	0.508364	0.511624	0.357982	0.91205	0.927735	-0.00299346	0.588347	0.362545	1.48138	0.622232	1.57859
-91.84	2.36122	2.92239	0.405552	1.01791	2.23613	-0.768877	1.82709	0.998888	1.16042	1.5439	3.33815	0.534085	0.521575	0.406984	0.904483	0.907761	0.0297064	0.558427	0.331786	1.49974	0.5685	1.57293
-91.36	2.33332	2.92812	0.409008	1.02748	2.2339	-0.811463	1.92754	1.00436	1.15575	1.54879	3.36038	0.555338	0.534517	0.471272	0.894746	0.88296	0.0627174	0.51808	0.294624	1.51735	0.513514	1.56961
-90.88	2.3063	2.93199	0.422757	1.03302	2.23707	-0.832011	2.02224	1.00727	1.14269	1.56508	3.39852	0.563752	0.549244	0.547663	0.885352	0.852108	0.0901773	0.468066	0.254433	1.52702	0.46064	1.57072
-90.4	2.28309	2.93523	0.448869	1.04222	2.24939	-0.843459	2.1034	1.00228	1.11651	1.58174	3.43923	0.565237	0.56162	0.631235	0.883411	0.812515	0.106775	0.411617	0.217852	1.5238	0.4115	1.57409
-89.92	2.25922	2.92935	0.481897	1.06378	2.26864	-0.852126	2.16011	0.987878	1.08402	1.58817	3.46339	0.570226	0.568078	0.713036	0.89459	0.76338	0.108997	0.35429	0.191552	1.5088	0.368384	1.57293
-89.44	2.23563	2.90731	0.51965	1.09525	2.29204	-0.859445	2.19046	0.967399	1.04724	1.58365	3.44506	0.587316	0.568302	0.779761	0.916538	0.711558	0.0973699	0.300023	0.179558	1.48632	0.33527	1.562
-88.96	2.21997	2.86599	0.556186	1.12519	2.31648	-0.867469	2.19809	0.945396	1.00278	1.57318	3.38487	0.613075	0.565053	0.82504	0.9451	0.66301	0.0756889	0.252147	0.180079	1.46334	0.313067	1.54175
-88.48	2.22315	2.81548	0.592421	1.14177	2.34064	-0.880489	2.19127	0.926275	0.943591	1.5629	3.30058	0.633829	0.564062	0.85104	0.972421	0.625609	0.0511971	0.213257	0.186129	1.44335	0.296945	1.51726
-88	2.24775	2.77348	0.626813	1.13878	2.36551	-0.89653	2.18152	0.910971	0.861914	1.55494	3.23778	0.63526	0.571699	0.868638	0.995616	0.594064	0.0291199	0.184578	0.191898	1.42713	0.278886	1.49477
-87.52	2.2884	2.75599	0.652538	1.12533	2.39061	-0.908699	2.18139	0.8989	0.767535	1.54644	3.23028	0.620112	0.591068	0.888861	1.01453	0.559387	0.0115154	0.164522	0.19375	1.41244	0.25054	1.47863
-87.04	2.32644	2.76565	0.66174	1.11321	2.41254	-0.90498	2.19125	0.888511	0.675523	1.53283	3.28733	0.606207	0.621731	0.912199	1.02567	0.511991	-0.00524182	0.14833	0.19102	1.39702	0.212471	1.46998
-86.56	2.34946	2.7917	0.647956	1.10442	2.42163	-0.878206	2.20743	0.880606	0.6013	1.51601	3.38349	0.618266	0.655523	0.929652	1.02651	0.448106	-0.0257163	0.13071	0.185374	1.38056	0.169228	1.46745
-86.08	2.35571	2.81499	0.611892	1.0925	2.41138	-0.83126	2.2191	0.876316	0.54871	1.50078	3.47713	0.668016	0.681939	0.925972	1.0146	0.376637	-0.0511303	0.108853	0.179665	1.36399	0.133997	1.46861
-85.6	2.35319	2.82443	0.563506	1.06436	2.38097	-0.773525	2.21623	0.875766	0.510261	1.48927	3.52876	0.74966	0.691631	0.892929	0.994586	0.308892	-0.0763493	0.0850662	0.177154	1.34832	0.114438	1.47164
-85.12	2.35383	2.82138	0.512081	1.00405	2.33649	-0.714737	2.19554	0.878292	0.480022	1.47788	3.52126	0.840993	0.679914	0.836392	0.979834	0.2515	-0.0903531	0.0639684	0.179769	1.3348	0.109953	1.47405
-84.64	2.35735	2.81442	0.468082	0.914543	2.2878	-0.648609	2.16472	0.881365	0.452424	1.4567	3.46323	0.920417	0.65028	0.77433	0.983946	0.203569	-0.0854443	0.0494045	0.185961	1.32072	0.112847	1.47514
-84.16	2.3594	2.81427	0.433745	0.804447	2.24158	-0.556011	2.13545	0.884167	0.434794	1.41817	3.37195	0.976398	0.608603	0.726266	1.01327	0.158944	-0.0618242	0.0431291	0.191844	1.30502	0.113612	1.47582
-83.68	2.35467	2.82464	0.408912	0.699406	2.19958	-0.428669	2.11557	0.886363	0.4338	1.36197	3.26192	1.01009	0.562606	0.702954	1.05953	0.109273	-0.0302107	0.0429808	0.192231	1.28594	0.1058	1.47765
-83.2	2.34168	2.84004	0.394176	0.619555	2.15804	-0.273396	2.10334	0.88734	0.451253	1.29807	3.13718	1.02606	0.517548	0.703329	1.10699	0.056161	-0.00529141	0.045935	0.184126	1.26436	0.0924063	1.48085
-82.72	2.32199	2.85322	0.386244	0.575174	2.11483	-0.121156	2.09491	0.886158	0.482162	1.24156	3.00062	1.02308	0.47484	0.71742	1.14175	0.00662573	0.0015717	0.0504119	0.169418	1.24379	0.0787118	1.48284
-82.24	2.29634	2.85889	0.382698	0.562219	2.07039	-0.0099622	2.08359	0.879107	0.51524	1.20113	2.85327	0.997589	0.43613	0.734754	1.15962	-0.0301281	-0.00994056	0.0562152	0.155768	1.22558	0.0755346	1.47994
-81.76	2.26235	2.8577	0.380547	0.565677	2.03036	0.0540881	2.06946	0.863702	0.547348	1.17841	2.70356	0.948822	0.401117	0.750908	1.16815	-0.0498259	-0.0315757	0.0631653	0.150435	1.20959	0.0854791	1.46524
-81.28	2.2214	2.85447	0.372764	0.569796	1.99944	0.0801066	2.05506	0.84035	0.582549	1.16818	2.56057	0.887538	0.371076	0.765373	1.1752	-0.0554521	-0.0512583	0.0701444	0.156137	1.19426	0.108504	1.43815
-80.8	2.18319	2.84797	0.355023	0.564357	1.97541	0.107678	2.04339	0.812789	0.629981	1.1657	2.42837	0.832928	0.345323	0.777576	1.18716	-0.0572844	-0.0627788	0.0743926	0.169673	1.17815	0.137831	1.40299
-80.32	2.16118	2.83643	0.330314	0.545124	1.95346	0.166129	2.03388	0.78549	0.693757	1.168	2.30588	0.800628	0.321759	0.782553	1.20013	-0.0612485	-0.0679748	0.0734553	0.183955	1.16028	0.164912	1.36731
-79.84	2.16919	2.81416	0.303223	0.518879	1.92804	0.253726	2.02188	0.761091	0.767137	1.17325	2.18972	0.793986	0.298139	0.771021	1.20826	-0.0708587	-0.0736422	0.065654	0.192428	1.14224	0.181986	1.33527
-79.36	2.21073	2.78025	0.277171	0.494488	1.89666	0.346154	2.00539	0.738665	0.832435	1.17687	2.07978	0.801201	0.273939	0.737191	1.20872	-0.0841873	-0.0845703	0.0510854	0.194372	1.12668	0.189603	1.30731
-78.88	2.26862	2.74144	0.249191	0.481961	1.86167	0.403559	1.98351	0.714476	0.872105	1.17597	1.97751	0.803562	0.253872	0.680795	1.20035	-0.0958769	-0.0994596	0.0307909	0.19307	1.11508	0.192123	1.27824
-78.4	2.32561	2.70175	0.217248	0.486798	1.82522	0.418283	1.95584	0.686858	0.871213	1.17012	1.88893	0.791894	0.243037	0.612391	1.18541	-0.0986839	-0.112429	0.00743669	0.193222	1.1058	0.193298	1.2445
-77.92	2.36075	2.66823	0.175631	0.509106	1.78965	0.408037	1.92351	0.656397	0.830469	1.16216	1.81037	0.770837	0.245653	0.549218	1.16357	-0.0904871	-0.117184	-0.0160881	0.194988	1.096	0.19606	1.20653
-77.44	2.36469	2.64256	0.126475	0.541182	1.75297	0.404617	1.88396	0.625972	0.760012	1.1572	1.73462	0.755057	0.257645	0.507126	1.13358	-0.0697474	-0.113554	-0.0361234	0.196991	1.08335	0.199899	1.16989
-76.96	2.34066	2.62814	0.0759187	0.569548	1.7087	0.433675	1.83428	0.598647	0.676356	1.15764	1.65489	0.754155	0.270628	0.492972	1.09381	-0.0394229	-0.107579	-0.0499373	0.196811	1.06812	0.202171	1.13966
-76.48	2.29721	2.62201	0.0309312	0.584179	1.65241	0.502681	1.77332	0.573308	0.592456	1.16161	1.57336	0.761781	0.276595	0.500604	1.04708	-0.00610897	-0.105871	-0.0550024	0.194182	1.05349	0.201434	1.11738
-76	2.24247	2.62151	-0.00597451	0.586362	1.58398	0.596485	1.70385	0.547334	0.521209	1.16427	1.49697	0.761358	0.271166	0.515132	0.996802	0.0254781	-0.111628	-0.0517748	0.192074	1.04377	0.199613	1.09996
-75.52	2.18317	2.61868	-0.0332007	0.581386	1.51468	0.704969	1.62913	0.518814	0.465836	1.16281	1.43446	0.736804	0.259038	0.519298	0.947533	0.0514709	-0.120921	-0.0434161	0.192963	1.04201	0.200921	1.08613
-75.04	2.12577	2.60101	-0.0544301	0.581705	1.45657	0.813269	1.55244	0.488852	0.429503	1.15986	1.3904	0.686292	0.247465	0.503708	0.901465	0.0703418	-0.128138	-0.0324262	0.196259	1.04544	0.206468	1.07312
-74.56	2.06767	2.56128	-0.0699108	0.598831	1.41965	0.909216	1.47902	0.460815	0.411286	1.16197	1.35892	0.621573	0.240521	0.470859	0.860179	0.086175	-0.131432	-0.0192722	0.196784	1.04855	0.215705	1.06276
-74.08	2.00829	2.50062	-0.0789647	0.625058	1.40441	0.982856	1.41288	0.438569	0.405659	1.1753	1.33452	0.560594	0.238648	0.430125	0.829174	0.0998599	-0.134398	-0.0013683	0.187731	1.046	0.219313	1.05605
-73.6	1.93501	2.43202	-0.0779903	0.647903	1.39998	1.01962	1.36182	0.42177	0.4087	1.19918	1.31933	0.512969	0.237683	0.392331	0.809836	0.114234	-0.143022	0.0218709	0.165911	1.03542	0.212684	1.05132
-73.12	1.84428	2.37306	-0.0684003	0.653481	1.3921	1.01887	1.33073	0.406491	0.409018	1.22599	1.31742	0.474237	0.23137	0.361146	0.80173	0.128406	-0.159984	0.0476031	0.134281	1.01964	0.196133	1.04422
-72.64	1.73583	2.33608	-0.0525929	0.636331	1.36854	0.99735	1.32272	0.387296	0.400867	1.24915	1.32813	0.430844	0.218015	0.333441	0.79622	0.144034	-0.179913	0.0698968	0.0987419	1.00582	0.174042	1.03272
-72.16	1.61836	2.32203	-0.0376273	0.604629	1.3281	0.982895	1.32889	0.361197	0.381412	1.2638	1.34424	0.375116	0.199665	0.304307	0.785662	0.161008	-0.192933	0.0827844	0.0666838	0.99811	0.15477	1.01546
-71.68	1.50787	2.31649	-0.0261956	0.575792	1.27858	0.996357	1.33914	0.329504	0.357001	1.27403	1.35173	0.307795	0.180275	0.272659	0.761077	0.180392	-0.192373	0.0850378	0.0426734	0.999498	0.137543	0.9946
-71.2	1.42784	2.30255	-0.0213704	0.561235	1.23176	1.03616	1.34223	0.29833	0.341984	1.28492	1.34645	0.239483	0.162514	0.243464	0.725308	0.202164	-0.178716	0.0815212	0.0260007	1.00457	0.123559	0.968203
-70.72	1.38953	2.26896	-0.0216936	0.564294	1.1966	1.08235	1.33229	0.272593	0.341484	1.29877	1.33814	0.178386	0.14942	0.222798	0.683651	0.223348	-0.159907	0.079452	0.0143824	1.00634	0.108747	0.934651
-70.24	1.40156	2.21465	-0.0283617	0.581276	1.17422	1.11059	1.31711	0.25363	0.355307	1.30945	1.34555	0.127861	0.141462	0.211862	0.643621	0.235386	-0.145401	0.0849864	0.00644068	0.999506	0.0944437	0.893544
-69.76	1.46018	2.14705	-0.0393869	0.601995	1.15826	1.12111	1.30442	0.237982	0.372046	1.30622	1.38359	0.0821615	0.138334	0.206304	0.609733	0.233065	-0.138046	0.0978387	0.00426321	0.981666	0.0825355	0.843887
-69.28	1.55336	2.08149	-0.0554048	0.619919	1.14392	1.13467	1.30087	0.221314	0.382631	1.2809	1.44016	0.0334529	0.138209	0.199031	0.577645	0.212884	-0.133893	0.112425	0.010215	0.956158	0.0771865	0.791123
-68.8	1.65654	2.0271	-0.0760306	0.632912	1.12467	1.17796	1.30606	0.202545	0.378612	1.23666	1.48771	-0.0198207	0.137152	0.186545	0.541352	0.182228	-0.126938	0.122563	0.0258309	0.92938	0.0800099	0.744712
-68.32	1.7447	1.99017	-0.101026	0.641363	1.10177	1.25509	1.31537	0.183851	0.36908	1.18609	1.49272	-0.0701304	0.129974	0.170576	0.49543	0.153328	-0.116164	0.125957	0.0514353	0.906303	0.0865137	0.709797
-67.84	1.80436	1.97055	-0.132629	0.639138	1.08062	1.34002	1.3238	0.169336	0.364671	1.14617	1.44107	-0.107858	0.114629	0.1554	0.442066	0.140516	-0.105814	0.124047	0.0814478	0.890083	0.0890411	0.685791
-67.36	1.8377	1.96568	-0.17118	0.627885	1.06737	1.40269	1.32953	0.161958	0.369894	1.12878	1.3437	-0.12379	0.0919935	0.144588	0.38678	0.152296	-0.10163	0.120793	0.108147	0.879138	0.0833601	0.671459
-66.88	1.86569	1.97113	-0.214653	0.606921	1.06784	1.42041	1.33538	0.160011	0.380266	1.13315	1.23149	-0.118113	0.0653613	0.136663	0.337245	0.185783	-0.104285	0.11881	0.124277	0.869135	0.0691654	0.66269
-66.4	1.90706	1.98389	-0.258128	0.580138	1.07964	1.40909	1.343	0.161178	0.386392	1.14991	1.13023	-0.100515	0.0409031	0.126372	0.298512	0.227293	-0.10726	0.118141	0.126934	0.857239	0.0519253	0.657137
-65.92	1.97023	2.00199	-0.291295	0.558456	1.09568	1.40175	1.35122	0.162725	0.38213	1.16568	1.05208	-0.0776874	0.0203766	0.107352	0.274511	0.259628	-0.103569	0.113873	0.118302	0.841083	0.0375033	0.652553
-65.44	2.04537	2.01934	-0.308252	0.545195	1.1067	1.42767	1.35367	0.165075	0.37188	1.17077	0.990658	-0.0539308	0.00249604	0.0795835	0.263321	0.270284	-0.0911657	0.103271	0.101213	0.821877	0.0309678	0.649658
-64.96	2.10415	2.03159	-0.310228	0.539586	1.10473	1.48444	1.34503	0.169628	0.373049	1.16712	0.931183	-0.0249173	-0.0143256	0.0484276	0.260117	0.255873	-0.0768641	0.0851647	0.0784237	0.802792	0.0311367	0.647456
-64.48	2.12497	2.03093	-0.302286	0.535785	1.08802	1.54904	1.32633	0.177209	0.395637	1.162	0.859374	0.0130976	-0.0285436	0.0178338	0.258215	0.224716	-0.0695364	0.0606334	0.0492419	0.786039	0.0336387	0.643999
-64	2.10538	2.01424	-0.291692	0.525209	1.0647	1.59534	1.30421	0.186594	0.440359	1.1611	0.776212	0.0615314	-0.0373117	-0.00673027	0.24857	0.191633	-0.0751403	0.0337865	0.0119743	0.771224	0.0336388	0.641285
-63.52	2.0554	1.9829	-0.283841	0.499425	1.04481	1.61716	1.28497	0.193269	0.485098	1.16154	0.690019	0.112939	-0.0391458	-0.0265172	0.225969	0.165556	-0.0899428	0.0077983	-0.0353271	0.757114	0.0288959	0.641503
-63.04	1.99726	1.94492	-0.279797	0.459101	1.03381	1.62996	1.27527	0.193392	0.510768	1.15704	0.616444	0.157476	-0.0358377	-0.0457251	0.191078	0.152019	-0.104565	-0.0126735	-0.0878365	0.741476	0.0249159	0.648666
-62.56	1.94858	1.91036	-0.278185	0.402714	1.03159	1.65338	1.27332	0.186317	0.504588	1.14266	0.568127	0.185697	-0.0331473	-0.068948	0.152491	0.141588	-0.110945	-0.0260963	-0.139248	0.72346	0.0252238	0.66518
-62.08	1.91466	1.88576	-0.28174	0.331094	1.02837	1.69842	1.27771	0.175006	0.470345	1.1213	0.550363	0.196381	-0.035275	-0.101047	0.121294	0.124797	-0.105881	-0.0336555	-0.183362	0.706243	0.0329854	0.686423
-61.6	1.89661	1.87242	-0.296285	0.252217	1.01786	1.75356	1.28473	0.163835	0.426911	1.10054	0.559827	0.192936	-0.0422215	-0.140405	0.102707	0.0923124	-0.0936317	-0.0383358	-0.214896	0.690324	0.044177	0.709259
-61.12	1.89254	1.86531	-0.328156	0.173945	0.994335	1.79819	1.29116	0.156434	0.393648	1.08734	0.584745	0.185888	-0.0482753	-0.18285	0.0970252	0.0465943	-0.0796041	-0.04731	-0.233897	0.676949	0.0521002	0.728911
-60.64	1.90557	1.86179	-0.37902	0.108339	0.960264	1.81903	1.29791	0.153288	0.374859	1.08149	0.613225	0.181903	-0.0478074	-0.222249	0.0980654	-0.00167827	-0.0663397	-0.0663881	-0.241937	0.663057	0.0499777	0.742989
-60.16	1.93606	1.86067	-0.444987	0.0654165	0.919181	1.81336	1.30553	0.152399	0.362475	1.07606	0.640026	0.188318	-0.0389051	-0.252891	0.0987306	-0.04568	-0.0538202	-0.0952426	-0.241395	0.642596	0.0342164	0.751263
-59.68	1.98331	1.86216	-0.511698	0.0431805	0.876098	1.79069	1.315	0.151022	0.343811	1.06446	0.667827	0.205163	-0.0273063	-0.272929	0.0981933	-0.0783591	-0.0399783	-0.129245	-0.234708	0.612774	0.00893695	0.754534
-59.2	2.03983	1.86503	-0.564658	0.0327697	0.831373	1.76198	1.32524	0.14813	0.316721	1.02011	0.700684	0.230046	-0.022982	-0.285335	0.0981379	-0.10337	-0.0250413	-0.159844	-0.223163	0.575724	-0.018989	0.752806
-58.72	2.10563	1.86402	-0.588372	0.0226493	0.787221	1.72476	1.33354	0.144755	0.290392	1.00608	0.740088	0.260916	-0.0322732	-0.296878	0.103997	-0.125214	-0.0114355	-0.179168	-0.209002	0.537102	-0.0423867	0.745295
-58.24	2.17836	1.85243	-0.581502	0.00484377	0.741731	1.66629	1.33723	0.142833	0.280393	1.00714	0.783809	0.294916	-0.0545948	-0.316417	0.11801	-0.142782	-0.000484457	-0.185228	-0.193596	0.501873	-0.0612633	0.734002
-57.76	2.25901	1.82868	-0.550923	-0.0240828	0.69681	1.57603	1.33475	0.14248	0.295931	1.02752	0.822239	0.332726	-0.0834494	-0.348826	0.132269	-0.147615	0.0077718	-0.180806	-0.178522	0.471635	-0.0777738	0.719888
-57.28	2.34394	1.79607	-0.508755	-0.054256	0.654087	1.45466	1.3308	0.141472	0.333643	1.0601	0.855768	0.370855	-0.109692	-0.392724	0.14031	-0.131951	0.0129321	-0.172143	-0.164022	0.443099	-0.0962879	0.707295
-56.8	2.42647	1.76468	-0.470294	-0.0734427	0.616359	1.32354	1.33142	0.136839	0.376084	1.09719	0.887536	0.408607	-0.128135	-0.440404	0.137653	-0.0926847	0.0159547	-0.165817	-0.148332	0.412781	-0.117125	0.699692
-56.32	2.49041	1.74226	-0.443836	-0.0790456	0.586026	1.21317	1.34521	0.127345	0.4063	1.13461	0.920757	0.443775	-0.137533	-0.478876	0.129534	-0.0391548	0.0127302	-0.164809	-0.129926	0.379379	-0.142978	0.6968
-55.84	2.52042	1.72957	-0.429598	-0.0718281	0.564738	1.15111	1.3183	0.114746	0.411844	1.16829	0.956938	0.475646	-0.141038	-0.498588	0.125878	0.0107421	-0.000258947	-0.168941	-0.10646	0.347255	-0.172672	0.695521
-55.36	2.50807	1.72196	-0.419963	-0.058448	0.550311	1.1419	1.36803	0.104061	0.395422	1.19732	0.990103	0.505757	-0.139363	-0.493077	0.134732	0.043808	-0.0252261	-0.177066	-0.0774541	0.320297	-0.206422	0.692995
-54.88	2.46191	1.70926	-0.405748	-0.0453344	0.536404	1.16514	1.42477	0.100747	0.365225	1.21714	1.01015	0.533884	-0.131257	-0.466996	0.157112	0.0566326	-0.0589735	-0.186995	-0.0430222	0.300897	-0.242849	0.686062
-54.4	2.39366	1.68756	-0.379957	-0.0306164	0.515527	1.18842	1.47357	0.105442	0.327556	1.22078	1.0086	0.560693	-0.115401	-0.430941	0.184742	0.0599109	-0.0935097	-0.194951	-0.00691506	0.286231	-0.281175	0.673643
-53.92	2.32537	1.6564	-0.344907	-0.0156701	0.483956	1.18788	1.50638	0.114228	0.282439	1.20446	0.98015	0.583224	-0.0913231	-0.398324	0.20736	0.0656293	-0.119249	-0.19811	0.0268907	0.270992	-0.313421	0.656185
-53.44	2.27128	1.62117	-0.306353	-0.00275526	0.443531	1.15828	1.52296	0.12012	0.22215	1.17346	0.92946	0.597401	-0.0621221	-0.375859	0.221822	0.0779582	-0.131766	-0.194638	0.0549663	0.252525	-0.338465	0.635135
-52.96	2.23286	1.58415	-0.273748	0.000150544	0.40353	1.11052	1.53208	0.118132	0.146944	1.13996	0.862007	0.599502	-0.0341384	-0.361617	0.232487	0.092278	-0.133832	-0.182643	0.0748975	0.233618	-0.355745	0.611105
-52.48	2.20097	1.54275	-0.25169	-0.015545	0.375989	1.06193	1.54514	0.108896	0.0618057	1.11765	0.797773	0.588757	-0.0127963	-0.34713	0.248336	0.0957561	-0.132449	-0.157922	0.0877058	0.220698	-0.369556	0.584061
-52	2.16309	1.49426	-0.240263	-0.0545082	0.367013	1.01759	1.56543	0.098894	-0.0210663	1.11375	0.754771	0.568885	0.00194187	-0.319773	0.277192	0.0820343	-0.13324	-0.136785	0.0959963	0.220335	-0.380043	0.555136
-51.52	2.11365	1.43306	-0.236642	-0.106081	0.37188	0.973484	1.58975	0.0952909	-0.0876535	1.12784	0.737371	0.545426	0.0109176	-0.275906	0.317848	0.0547279	-0.136226	-0.114042	0.101014	0.23274	-0.385275	0.525872
-51.04	2.06352	1.36181	-0.23422	-0.152065	0.382919	0.923056	1.60843	0.102017	-0.130446	1.15373	0.729826	0.525616	0.0178657	-0.219127	0.363751	0.0263202	-0.135035	-0.0911568	0.10268	0.248502	-0.381877	0.498209
-50.56	2.02813	1.28734	-0.231917	-0.173789	0.389621	0.87296	1.61327	0.117493	-0.154682	1.18237	0.699645	0.516023	0.0237137	-0.159422	0.405195	0.00633265	-0.122381	-0.0681821	0.0985502	0.257252	-0.369823	0.47441
-50.08	2.01973	1.22165	-0.227424	-0.161926	0.387434	0.83562	1.60506	0.135941	-0.167148	1.20682	0.618373	0.520124	0.0267559	-0.108937	0.432911	-0.00241434	-0.09614	-0.0450003	0.0881041	0.251891	-0.356863	0.455845
-49.6	2.03168	1.17544	-0.224403	-0.125453	0.37735	0.826795	1.59094	0.151568	-0.176451	1.21975	0.491731	0.53927	0.0252455	-0.0748371	0.437948	-0.00571076	-0.0645481	-0.0210453	0.0738491	0.234632	-0.350646	0.437546
-49.12	2.04395	1.15452	-0.226532	-0.0853192	0.364904	0.840307	1.58458	0.16377	-0.185507	1.21998	0.362012	0.571301	0.0206617	-0.0571324	0.413763	-0.0105182	-0.0385997	0.00431462	0.0611056	0.21383	-0.356403	0.418238
-48.64	2.0349	1.15563	-0.230729	-0.0613803	0.350969	0.86034	1.59069	0.174768	-0.194908	1.20658	0.289616	0.610174	0.0173801	-0.0563524	0.361473	-0.0166566	-0.0244503	0.031406	0.0544069	0.199311	-0.372182	0.395394
-48.16	1.98911	1.16838	-0.234118	-0.0611713	0.336864	0.878332	1.60829	0.18853	-0.198597	1.1881	0.306487	0.646623	0.0206181	-0.0709351	0.289208	-0.0195337	-0.0170798	0.0592032	0.0549461	0.196317	-0.391061	0.36776
-47.68	1.90852	1.17969	-0.235121	-0.0827878	0.319041	0.892304	1.6293	0.206272	-0.196945	1.17198	0.391757	0.673245	0.0322063	-0.100843	0.211574	-0.0147111	-0.00211144	0.085792	0.0596247	0.202816	-0.408203	0.336777
-47.2	1.80924	1.17979	-0.230243	-0.110396	0.295346	0.921508	1.64286	0.226858	-0.189273	1.16346	0.479261	0.685552	0.0473906	-0.143767	0.145158	-0.00125204	0.0333102	0.107613	0.0633835	0.214599	-0.426908	0.305604
-46.72	1.71198	1.16861	-0.218209	-0.129851	0.263245	0.97952	1.64174	0.247944	-0.178619	1.15791	0.499628	0.683535	0.0590746	-0.191362	0.102267	0.0151903	0.0903781	0.124667	0.0636601	0.224684	-0.449575	0.278976
-46.24	1.63174	1.15254	-0.202537	-0.131398	0.228452	1.06409	1.6244	0.267872	-0.166748	1.14631	0.432896	0.673138	0.0619724	-0.233044	0.0799568	0.0303015	0.157006	0.137828	0.0611389	0.229775	-0.481411	0.259129
-45.76	1.57807	1.14217	-0.184005	-0.117137	0.195609	1.1511	1.5937	0.286261	-0.157331	1.12559	0.317998	0.659855	0.0567039	-0.259977	0.0702757	0.0428053	0.213981	0.151469	0.0591211	0.22861	-0.515906	0.246347
-45.28	1.55679	1.14009	-0.161844	-0.0931486	0.169587	1.21408	1.55519	0.303257	-0.151304	1.10053	0.223654	0.64742	0.0511698	-0.27108	0.0628653	0.0573392	0.247944	0.167085	0.0606329	0.220182	-0.541461	0.237835
-44.8	1.56532	1.141	-0.133043	-0.0648674	0.156867	1.24914	1.51855	0.318713	-0.14571	1.08357	0.195521	0.636039	0.0553553	-0.27199	0.0525331	0.0798651	0.25672	0.181493	0.0661381	0.20315	-0.548905	0.227823
-44.32	1.60182	1.1373	-0.0942234	-0.0383243	0.157127	1.27499	1.49046	0.332491	-0.132395	1.08686	0.23001	0.621257	0.0734141	-0.270238	0.0441647	0.11001	0.249032	0.188248	0.0747874	0.177919	-0.540501	0.212634
-43.84	1.65735	1.12302	-0.0463092	-0.011171	0.167611	1.32078	1.4775	0.345917	-0.101208	1.10861	0.289214	0.602755	0.103105	-0.26803	0.0416024	0.14096	0.235251	0.181366	0.0854849	0.148312	-0.527841	0.18988
-43.36	1.71823	1.09947	0.00539205	0.0148267	0.181529	1.40277	1.48027	0.361521	-0.0419098	1.13559	0.331111	0.584802	0.13257	-0.260919	0.0455274	0.160844	0.221865	0.160601	0.0966987	0.120867	-0.524476	0.16405
-42.88	1.77324	1.0754	0.0520576	0.0409098	0.191743	1.50153	1.49338	0.382797	0.0500844	1.14965	0.346455	0.574115	0.151476	-0.242388	0.0525673	0.164566	0.208107	0.135093	0.110461	0.101969	-0.536	0.142146
-42.4	1.81451	1.06287	0.0889074	0.0611465	0.194037	1.58494	1.50842	0.41068	0.163651	1.14135	0.352062	0.580733	0.154488	-0.210706	0.0558782	0.155303	0.192984	0.117911	0.127469	0.0955243	-0.55877	0.128546
-41.92	1.83385	1.0628	0.0652502	0.0727562	0.190352	1.6341	1.51779	0.443855	0.282186	1.11259	0.366116	0.60276	0.143404	-0.173274	0.0519197	0.145863	0.176198	0.116957	0.147636	0.097988	-0.582473	0.125218
-41.44	1.8346	1.06767	0.0844172	0.0787335	0.185066	1.65345	1.51653	0.477582	0.384553	1.07653	0.389862	0.634853	0.126555	-0.143809	0.0413863	0.146725	0.162211	0.133612	0.169594	0.103628	-0.598936	0.127479
-40.96	1.82706	1.06598	0.105903	0.0924788	0.185143	1.67958	1.50148	0.506486	0.455069	1.04687	0.405059	0.666143	0.112871	-0.131325	0.0270915	0.162923	0.154866	0.159181	0.192573	0.10627	-0.602867	0.127856
-40.48	1.82209	1.05339	0.135339	0.123572	0.19332	1.74414	1.47584	0.529198	0.491498	1.02993	0.395413	0.686275	0.107747	-0.136339	0.0132182	0.190566	0.154634	0.182404	0.213889	0.102878	-0.596671	0.119498
-40	1.82985	1.03697	0.173389	0.175669	0.208023	1.85061	1.44093	0.547484	0.505397	1.0202	0.361979	0.692301	0.112803	-0.149277	0.00401137	0.221671	0.158595	0.196672	0.232727	0.0952114	-0.584451	0.102155
-39.52	1.84862	1.03282	0.213944	0.238428	0.227029	1.97329	1.39955	0.565971	0.510013	1.00951	0.32713	0.685836	0.124758	-0.156434	0.00573566	0.251549	0.161419	0.204326	0.24657	0.0873811	-0.571022	0.0802893
-39.04	1.8726	1.05373	0.249617	0.294252	0.24586	2.07299	1.3553	0.589386	0.522785	0.99166	0.315209	0.674553	0.137288	-0.149291	0.0235414	0.280716	0.159447	0.209127	0.255344	0.0836159	-0.559109	0.0596004
-38.56	1.88925	1.09845	0.278225	0.333709	0.260886	2.11758	1.30991	0.619868	0.551802	0.970203	0.337363	0.662508	0.145157	-0.129865	0.0620922	0.312061	0.154117	0.215962	0.260074	0.0852326	-0.553459	0.0475254
-38.08	1.89233	1.15399	0.29951	0.359966	0.272432	2.10499	1.26382	0.654308	0.599441	0.952658	0.382098	0.651688	0.146103	-0.104887	0.118662	0.352156	0.148638	0.224276	0.264489	0.091179	-0.553347	0.0417903
-37.6	1.89205	1.20092	0.320097	0.38779	0.281249	2.05552	1.21834	0.687985	0.66428	0.948431	0.432573	0.636837	0.144255	-0.0827861	0.183753	0.400056	0.144899	0.23094	0.271779	0.0989648	-0.558674	0.0387681
-37.12	1.89647	1.22935	0.349532	0.424579	0.287719	1.99635	1.17584	0.716906	0.740318	0.960898	0.477298	0.607702	0.14741	-0.0674829	0.243038	0.450041	0.142218	0.232707	0.284744	0.106667	-0.565999	0.0342013
-36.64	1.9156	1.23581	0.391862	0.465531	0.292633	1.95081	1.13894	0.741592	0.820092	0.985519	0.516375	0.55642	0.162461	-0.0586879	0.287056	0.493068	0.137329	0.223537	0.300617	0.112955	-0.571884	0.0274048
-36.16	1.9484	1.22599	0.447317	0.49311	0.295064	1.93189	1.10697	0.764197	0.901435	1.01269	0.555609	0.477814	0.189081	-0.0565547	0.314354	0.522939	0.126705	0.217939	0.316481	0.116955	-0.576722	0.0195978
-35.68	1.98521	1.21021	0.505801	0.494185	0.295855	1.94442	1.07832	0.788101	0.982938	1.0329	0.6008	0.379952	0.220565	-0.0619836	0.33113	0.537986	0.109599	0.216136	0.327515	0.11738	-0.582666	0.0155669
-35.2	2.0125	1.19249	0.555052	0.472733	0.294957	1.98954	1.04962	0.81308	1.06974	1.04359	0.648219	0.282291	0.247242	-0.0753385	0.345375	0.542568	0.0879185	0.220734	0.330845	0.114937	-0.593311	0.018035
-34.72	2.02226	1.18202	0.5877	0.451543	0.294326	2.06616	1.02317	0.835098	1.16439	1.05035	0.693795	0.208694	0.261936	-0.0932453	0.365386	0.542798	0.0643013	0.233001	0.325896	0.108352	-0.609267	0.0228657
-34.24	2.01445	1.18528	0.604256	0.455757	0.29269	2.16103	0.99904	0.84997	1.26559	1.06298	0.72915	0.178222	0.263895	-0.106202	0.392575	0.543208	0.0424381	0.25271	0.314825	0.098998	-0.6263	0.0232899
-33.76	1.99465	1.20619	0.613248	0.494313	0.29115	2.25405	0.980381	0.856574	1.36766	1.08946	0.753164	0.190622	0.259462	-0.109895	0.428773	0.544507	0.0244165	0.276708	0.299942	0.0884711	-0.637142	0.0134373
-33.28	1.96936	1.24	0.629767	0.557063	0.290676	2.31929	0.968418	0.859545	1.46083	1.13149	0.767436	0.232887	0.254682	-0.101598	0.470578	0.546051	0.011408	0.305039	0.283145	0.0759041	-0.635904	-0.00814627
-32.8	1.9403	1.27571	0.657602	0.622123	0.293546	2.33408	0.96142	0.866339	1.53438	1.1823	0.774242	0.282031	0.250693	-0.0905282	0.512873	0.546342	0.00471774	0.333174	0.265486	0.0623967	-0.623773	-0.0358628
-32.32	1.91204	1.29749	0.691534	0.680079	0.306056	2.28898	0.959766	0.883515	1.58424	1.22348	0.784736	0.321092	0.244326	-0.087907	0.54766	0.546034	0.00443561	0.357323	0.24711	0.0462574	-0.60472	-0.0621083
-31.84	1.89294	1.29282	0.72	0.735587	0.329851	2.18999	0.964604	0.910494	1.6122	1.25834	0.804735	0.343331	0.231564	-0.0991922	0.571656	0.540824	0.00920955	0.374685	0.230297	0.0274651	-0.586463	-0.0815157
-31.36	1.89587	1.26296	0.731755	0.805984	0.364995	2.05692	0.982048	0.939651	1.62598	1.27838	0.837735	0.34942	0.213609	-0.120259	0.588421	0.531846	0.0129095	0.384617	0.21665	0.00831616	-0.572771	-0.093798
-30.88	1.93314	1.21511	0.727285	0.897615	0.409947	1.92321	1.01431	0.961705	1.62941	1.28952	0.879529	0.344278	0.197005	-0.140999	0.605819	0.51657	0.00670457	0.389363	0.209982	-0.00828234	-0.564278	-0.10462
-30.4	2.00744	1.16055	0.71805	0.998973	0.45911	1.81459	1.06071	0.970264	1.62323	1.30019	0.923092	0.328609	0.189789	-0.152501	0.634952	0.496692	-0.0146155	0.395711	0.212865	-0.0220078	-0.558766	-0.120769
-29.92	2.11013	1.10669	0.720186	1.0884	0.51346	1.74181	1.11182	0.966387	1.60509	1.31726	0.965038	0.303601	0.196011	-0.1533	0.681342	0.475986	-0.0514326	0.40792	0.227136	-0.0335008	-0.554844	-0.14578
-29.44	2.22297	1.0522	0.740149	1.14858	0.571125	1.69556	1.15639	0.958103	1.58085	1.34173	1.00396	0.272944	0.212573	-0.147284	0.739874	0.460716	-0.0956229	0.425615	0.250076	-0.049047	-0.55591	-0.176258
-28.96	2.32762	1.00109	0.777865	1.17851	0.631834	1.65319	1.18079	0.95353	1.55486	1.36641	1.04085	0.243966	0.233523	-0.142595	0.795613	0.454969	-0.136732	0.44395	0.275769	-0.0727356	-0.566513	-0.203671
-28.48	2.41028	0.957094	0.82181	1.19439	0.687535	1.58962	1.18567	0.95683	1.5361	1.38008	1.0758	0.224984	0.250889	-0.144575	0.833872	0.456637	-0.166029	0.455315	0.296534	-0.103331	-0.585859	-0.221375
-28	2.47325	0.925703	0.856394	1.20579	0.731674	1.49666	1.1744	0.967622	1.52532	1.37425	1.0971	0.220804	0.25965	-0.154452	0.850632	0.455891	-0.181128	0.453958	0.305794	-0.134524	-0.609111	-0.227438
-27.52	2.52065	0.907327	0.876189	1.21333	0.757312	1.38236	1.155	0.981651	1.51264	1.34988	1.08979	0.230734	0.258718	-0.170158	0.8525	0.439489	-0.187198	0.441985	0.302436	-0.159413	-0.626545	-0.225667
-27.04	2.56469	0.896292	0.8894	1.20287	0.76706	1.26163	1.13595	0.995542	1.48141	1.31927	1.04608	0.2509	0.249529	-0.191642	0.849437	0.397273	-0.189402	0.427804	0.290334	-0.173279	-0.628908	-0.222435
-26.56	2.60412	0.888396	0.907103	1.16766	0.770147	1.15124	1.11893	1.00669	1.4186	1.30389	0.970478	0.275956	0.23384	-0.215803	0.849119	0.332015	-0.192011	0.422297	0.276506	-0.177433	-0.617164	-0.223509
-26.08	2.63401	0.88178	0.937785	1.10966	0.777621	1.04899	1.09943	1.01376	1.32231	1.31976	0.878935	0.30467	0.217929	-0.238489	0.853268	0.253155	-0.195656	0.432439	0.26575	-0.176814	-0.605946	-0.227866
-25.6	2.64293	0.884443	0.979241	1.03822	0.794072	0.940383	1.07246	1.01799	1.21178	1.37435	0.784185	0.339964	0.208657	-0.253529	0.854832	0.179823	-0.198635	0.457101	0.262271	-0.177871	-0.611278	-0.232272
-25.12	2.62949	0.905569	1.02193	0.968372	0.820866	0.815432	1.03622	1.02093	1.11097	1.45594	0.688354	0.381607	0.213231	-0.255515	0.849095	0.125125	-0.201473	0.49031	0.265725	-0.181891	-0.640026	-0.232359
-24.64	2.59537	0.944194	1.05638	0.903121	0.848417	0.684325	0.990779	1.02641	1.03856	1.5444	0.584664	0.427766	0.234006	-0.243298	0.834938	0.0918427	-0.204739	0.525193	0.273433	-0.188442	-0.688498	-0.226568
-24.16	2.54643	0.989236	1.07895	0.84388	0.874301	0.573048	0.943464	1.03736	1.00808	1.6153	0.48111	0.476891	0.267372	-0.219725	0.817567	0.0698491	-0.208805	0.558666	0.281248	-0.197099	-0.742076	-0.219038
-23.68	2.48931	1.02218	1.0961	0.786607	0.896768	0.510362	0.901867	1.05526	1.01222	1.65463	0.399032	0.527793	0.304255	-0.18861	0.802416	0.0439667	-0.21275	0.589625	0.284999	-0.207721	-0.785052	-0.213002
-23.2	2.43092	1.03521	1.12234	0.728118	0.923877	0.500441	0.873289	1.07702	1.03581	1.6591	0.372244	0.58066	0.335206	-0.154679	0.7899	0.00412522	-0.214463	0.616887	0.280572	-0.222084	-0.81096	-0.211065
-22.72	2.37619	1.03476	1.1671	0.671836	0.95792	0.522763	0.859575	1.09674	1.06461	1.63822	0.414713	0.638163	0.354928	-0.120519	0.775327	-0.0499454	-0.214808	0.636705	0.264352	-0.241541	-0.825161	-0.21315
-22.24	2.33463	1.03459	1.23028	0.613271	0.995961	0.539974	0.856877	1.10808	1.08508	1.60759	0.497734	0.697039	0.365865	-0.0892181	0.755585	-0.108274	-0.21632	0.644837	0.237047	-0.262767	-0.836732	-0.216975
-21.76	2.32009	1.04388	1.29766	0.550145	1.03189	0.525471	0.85933	1.10892	1.08972	1.57906	0.571832	0.751308	0.374042	-0.0596856	0.729564	-0.161028	-0.222148	0.639188	0.202289	-0.28163	-0.85553	-0.219118
-21.28	2.33624	1.05934	1.35265	0.480897	1.06123	0.483116	0.856823	1.10304	1.07548	1.56179	0.606656	0.793975	0.387623	-0.0312097	0.698592	-0.204386	-0.231833	0.624046	0.166803	-0.29673	-0.886012	-0.218461
-20.8	2.37832	1.07014	1.38175	0.410984	1.08506	0.436822	0.847242	1.09726	1.04657	1.55672	0.629824	0.81983	0.410129	-0.000500105	0.66984	-0.243326	-0.240417	0.608838	0.135992	-0.308079	-0.925714	-0.216638
-20.32	2.43181	1.07103	1.38469	0.35615	1.10936	0.412266	0.83275	1.09739	1.01823	1.56	0.71274	0.829265	0.438507	0.0386563	0.642888	-0.284442	-0.240596	0.601665	0.112258	-0.31985	-0.969703	-0.214283
-19.84	2.47819	1.07182	1.37675	0.32542	1.13867	0.413503	0.820414	1.10392	1.00099	1.56533	0.909441	0.828025	0.466702	0.0905643	0.617375	-0.329396	-0.227613	0.604209	0.0935631	-0.335649	-1.01061	-0.213912
-19.36	2.50863	1.08998	1.37599	0.320085	1.17306	0.425337	0.816274	1.11443	1.00289	1.56808	1.20331	0.823269	0.48723	0.155663	0.589435	-0.37224	-0.202311	0.609062	0.0757128	-0.353376	-1.04374	-0.21399
-18.88	2.52667	1.13601	1.39466	0.330454	1.20428	0.435275	0.823455	1.12648	1.01408	1.56295	1.49232	0.819137	0.496116	0.228045	0.558063	-0.4033	-0.169704	0.608289	0.0575099	-0.369423	-1.06561	-0.213035
-18.4	2.54456	1.20213	1.43344	0.349412	1.22627	0.457546	0.839202	1.14103	1.01618	1.54837	1.65451	0.815984	0.497706	0.301874	0.527125	-0.417645	-0.134211	0.598701	0.0390218	-0.377047	-1.07647	-0.208147
-17.92	2.56928	1.26135	1.47906	0.378455	1.23551	0.529747	0.857623	1.16084	0.996143	1.52263	1.63284	0.813308	0.498558	0.372739	0.503661	-0.417988	-0.0976746	0.585688	0.0251419	-0.374384	-1.07717	-0.197642
-17.44	2.6005	1.28336	1.51857	0.427904	1.23596	0.687369	0.872712	1.19001	0.953072	1.48724	1.47893	0.808714	0.50714	0.438806	0.494376	-0.411652	-0.0590483	0.579101	0.0180259	-0.361678	-1.07334	-0.18459
-16.96	2.62778	1.25905	1.54629	0.506049	1.23416	0.927406	0.879235	1.22731	0.906156	1.44299	1.32138	0.799386	0.526155	0.496896	0.500202	-0.401651	-0.0176131	0.586217	0.0162996	-0.341133	-1.06844	-0.171292
-16.48	2.64154	1.20195	1.56505	0.605987	1.23336	1.20111	0.876617	1.26804	0.878737	1.3951	1.2764	0.785011	0.550788	0.54167	0.517745	-0.389184	0.0242616	0.605953	0.0178139	-0.313232	-1.06801	-0.162547
-16	2.64144	1.14127	1.5836	0.702808	1.23185	1.43644	0.866354	1.30706	0.886564	1.34576	1.37372	0.767198	0.574228	0.565952	0.541144	-0.370274	0.0615056	0.627616	0.0206026	-0.280745	-1.07094	-0.15954
-15.52	2.6359	1.10849	1.61391	0.762973	1.22616	1.58378	0.852057	1.33971	0.931018	1.30212	1.55065	0.750306	0.588347	0.564382	0.56664	-0.346215	0.0897847	0.64027	0.0265067	-0.246088	-1.07622	-0.160855
-15.04	2.63886	1.11472	1.65931	0.772426	1.21789	1.64475	0.836268	1.36551	0.994673	1.2655	1.70847	0.740583	0.591986	0.538023	0.591491	-0.321242	0.107367	0.638865	0.0383501	-0.215196	-1.08479	-0.163106
-14.56	2.66151	1.15074	1.71572	0.735204	1.21119	1.66435	0.821652	1.38685	1.06216	1.23662	1.7858	0.742739	0.588742	0.498602	0.615665	-0.305165	0.11722	0.626865	0.0572261	-0.194535	-1.09613	-0.162961
-14.08	2.70336	1.20119	1.77666	0.672914	1.21314	1.68706	0.809539	1.40581	1.12414	1.21254	1.79092	0.754404	0.58357	0.459684	0.637399	-0.300916	0.122441	0.614393	0.0824628	-0.187166	-1.10769	-0.16116
-13.6	2.75711	1.25103	1.83231	0.606982	1.22389	1.73102	0.800071	1.42319	1.17751	1.19322	1.77167	0.764863	0.578247	0.433152	0.65226	-0.307868	0.126766	0.608809	0.109092	-0.190155	-1.11832	-0.159813
-13.12	2.81074	1.29865	1.8765	0.548518	1.23823	1.78219	0.792841	1.43963	1.22444	1.17477	1.77185	0.763495	0.569654	0.423321	0.656582	-0.316071	0.133035	0.612524	0.132812	-0.19673	-1.12365	-0.163372
-12.64	2.85751	1.352	1.90315	0.49668	1.24827	1.81991	0.785103	1.45439	1.26601	1.16051	1.8013	0.743478	0.553647	0.428085	0.649576	-0.314978	0.141474	0.620731	0.154507	-0.197946	-1.12333	-0.173842
-12.16	2.892	1.41369	1.91383	0.443386	1.24917	1.84189	0.77577	1.46814	1.29864	1.15474	1.84111	0.715137	0.529026	0.444335	0.638286	-0.297784	0.153591	0.629081	0.178307	-0.191796	-1.11903	-0.189236
-11.68	2.91968	1.48508	1.91533	0.389349	1.24482	1.86829	0.763619	1.48213	1.32296	1.16529	1.86697	0.697475	0.499785	0.468401	0.629433	-0.265815	0.171245	0.63837	0.209557	-0.181096	-1.11604	-0.204853
-11.2	2.95636	1.55472	1.91837	0.347605	1.2413	1.92465	0.750758	1.49857	1.34567	1.19699	1.86888	0.709655	0.474911	0.499161	0.629123	-0.221646	0.192352	0.655017	0.251506	-0.172266	-1.11611	-0.21631
-10.72	3.01321	1.61081	1.93689	0.327169	1.24953	2.02089	0.744943	1.51828	1.37194	1.24896	1.85523	0.753544	0.4621	0.529181	0.634079	-0.170711	0.212453	0.684021	0.300553	-0.17135	-1.11782	-0.222663
-10.24	3.09103	1.64352	1.97559	0.337011	1.27172	2.14238	0.748961	1.54117	1.40321	1.31272	1.83015	0.8175	0.46541	0.549792	0.637245	-0.11634	0.22432	0.725909	0.350209	-0.181546	-1.11788	-0.224751
-9.76	3.17829	1.65311	2.02812	0.378792	1.30602	2.26988	0.763979	1.56618	1.43211	1.37565	1.79472	0.879288	0.482272	0.554922	0.633512	-0.0627446	0.222737	0.774863	0.396258	-0.20025	-1.11228	-0.223492
-9.28	3.25227	1.65018	2.07693	0.44573	1.34609	2.39077	0.784455	1.59111	1.44512	1.42685	1.74835	0.917628	0.506607	0.545843	0.626473	-0.0163408	0.209241	0.820101	0.438732	-0.22533	-1.102	-0.220835
-8.8	3.29041	1.64795	2.10407	0.533734	1.38521	2.5015	0.802493	1.6149	1.43482	1.46328	1.6924	0.9276	0.530397	0.529119	0.626105	0.0191988	0.190398	0.853195	0.47994	-0.255815	-1.08867	-0.218545
-8.32	3.28528	1.65833	2.10087	0.636167	1.4184	2.59877	0.812069	1.63644	1.40687	1.48886	1.62933	0.922042	0.55051	0.520137	0.639256	0.0424001	0.176078	0.872935	0.522379	-0.288746	-1.07254	-0.217511
-7.84	3.24998	1.68629	2.07269	0.744862	1.44256	2.66823	0.811165	1.65492	1.38106	1.50854	1.56507	0.91568	0.567039	0.529293	0.665819	0.0561927	0.173287	0.88197	0.562813	-0.323825	-1.05455	-0.220077
-7.36	3.20561	1.72287	2.03901	0.840496	1.45561	2.69375	0.803239	1.66967	1.3716	1.52335	1.49649	0.917292	0.583015	0.558266	0.692918	0.0667819	0.180493	0.883746	0.595572	-0.358152	-1.03411	-0.226863
-6.88	3.17503	1.74877	2.01589	0.914028	1.45921	2.66458	0.794675	1.67734	1.38276	1.52981	1.42443	0.924672	0.603178	0.598521	0.710473	0.0762434	0.191728	0.878123	0.613455	-0.389688	-1.01403	-0.237196
-6.4	3.17114	1.75122	2.0113	0.955136	1.45799	2.59344	0.790198	1.67428	1.40227	1.52149	1.35435	0.927189	0.628699	0.635481	0.712092	0.0850594	0.19703	0.863875	0.613361	-0.416227	-1.00316	-0.248407
-5.92	3.19165	1.72542	2.01969	0.966689	1.45944	2.5147	0.795291	1.65772	1.41407	1.50026	1.29727	0.921154	0.657628	0.658498	0.707052	0.0937148	0.188962	0.839985	0.597618	-0.438506	-1.00646	-0.257162
-5.44	3.22694	1.68306	2.03102	0.962535	1.46896	2.46816	0.809313	1.62934	1.41006	1.47577	1.26951	0.909278	0.686725	0.665982	0.709561	0.103084	0.166829	0.809365	0.570673	-0.458837	-1.02301	-0.258716
-4.96	3.25929	1.6513	2.03699	0.961826	1.48821	2.47665	0.833017	1.59495	1.39295	1.45854	1.27831	0.901337	0.713355	0.662776	0.73186	0.115051	0.135834	0.777641	0.538825	-0.477462	-1.04581	-0.252356
-4.48	3.27635	1.65283	2.04199	0.97802	1.51253	2.5326	0.86273	1.56397	1.38161	1.45069	1.31643	0.901703	0.737538	0.658489	0.774918	0.131938	0.10705	0.750832	0.5062	-0.494901	-1.06314	-0.237
-4	3.26647	1.68952	2.0514	1.01286	1.53369	2.60516	0.893152	1.54399	1.38792	1.44334	1.36433	0.903354	0.758463	0.65655	0.827368	0.1531	0.089669	0.729251	0.476235	-0.509528	-1.06909	-0.214348
-3.52	3.22431	1.75087	2.0692	1.066	1.54443	2.66089	0.918872	1.53718	1.40762	1.42343	1.40239	0.894278	0.775374	0.657505	0.874766	0.176535	0.0904971	0.710344	0.451925	-0.523355	-1.06432	-0.189165
-3.04	3.15975	1.81382	2.09403	1.1319	1.54646	2.67415	0.936907	1.54146	1.42566	1.38502	1.41707	0.868979	0.785801	0.662841	0.904703	0.197126	0.111917	0.688819	0.436336	-0.536784	-1.05451	-0.166664
-2.56	3.09758	1.86064	2.11972	1.20022	1.5448	2.64521	0.946954	1.5518	1.41872	1.33947	1.40905	0.833256	0.787983	0.674045	0.915133	0.213069	0.150783	0.661587	0.429396	-0.548488	-1.04401	-0.151774
-2.08	3.076	1.88876	2.14333	1.26376	1.54461	2.59385	0.952627	1.56478	1.37964	1.30764	1.394	0.802816	0.784157	0.693011	0.909473	0.225087	0.199626	0.629558	0.429781	-0.560169	-1.03259	-0.147268
-1.6	3.12112	1.90805	2.1667	1.3201	1.54839	2.55139	0.9576	1.5789	1.31386	1.30628	1.38795	0.787233	0.780893	0.718638	0.893782	0.232937	0.247572	0.594985	0.432254	-0.570157	-1.01619	-0.152049
-1.12	3.23622	1.92959	2.20053	1.3719	1.55548	2.53723	0.962788	1.59367	1.24177	1.33758	1.40765	0.786681	0.785632	0.742391	0.874344	0.240742	0.285644	0.561445	0.432613	-0.577961	-0.994148	-0.160958
-0.64	3.3923	1.95671	2.24792	1.41404	1.56095	2.55171	0.968934	1.60895	1.17521	1.38687	1.45526	0.787112	0.800687	0.753949	0.856266	0.247388	0.306253	0.530364	0.427562	-0.587151	-0.968166	-0.170512
-0.16	3.54176	1.97959	2.30897	1.44556	1.5628	2.57308	0.97571	1.62377	1.1264	1.43031	1.52625	0.775474	0.818637	0.746348	0.844018	0.258814	0.306906	0.500463	0.415522	-0.600885	-0.94528	-0.179554
0.32	3.64986	1.99074	2.37088	1.46486	1.55794	2.57591	0.98167	1.63716	1.09557	1.45729	1.60852	0.749475	0.827366	0.723551	0.838229	0.276546	0.288575	0.469701	0.397908	-0.623339	-0.930338	-0.192331
0.8	3.70869	1.99006	2.41903	1.46394	1.54749	2.55129	0.985045	1.65045	1.08591	1.46788	1.68345	0.720932	0.817368	0.699899	0.835344	0.301416	0.254284	0.436623	0.374974	-0.652944	-0.923955	-0.212811
1.28	3.74625	1.98322	2.44097	1.44054	1.53478	2.50751	0.982574	1.66474	1.09183	1.4731	1.7374	0.702231	0.7878	0.690929	0.826816	0.324621	0.210697	0.400059	0.348952	-0.685866	-0.920438	-0.241207
1.76	3.79967	1.97526	2.43777	1.39651	1.52142	2.46567	0.970238	1.67949	1.10949	1.48311	1.75968	0.697383	0.748396	0.702538	0.806295	0.334669	0.164296	0.361663	0.322398	-0.717557	-0.918281	-0.2749
2.24	3.89424	1.9641	2.41461	1.34084	1.51111	2.42651	0.949505	1.69155	1.1308	1.49612	1.74665	0.69689	0.713422	0.731124	0.774466	0.324793	0.118732	0.323172	0.297489	-0.744535	-0.922995	-0.306685
2.72	4.02798	1.93828	2.38839	1.27943	1.50246	2.37894	0.92576	1.69508	1.14328	1.50513	1.69646	0.689256	0.691848	0.76503	0.734667	0.296958	0.07506	0.28411	0.274835	-0.768814	-0.940048	-0.333153
3.2	4.17263	1.89006	2.36586	1.22592	1.49544	2.29687	0.907668	1.6872	1.14439	1.50279	1.61391	0.669154	0.681878	0.798623	0.698873	0.266315	0.0320613	0.244184	0.25491	-0.794997	-0.972184	-0.353984
3.68	4.29139	1.8239	2.34911	1.18125	1.48885	2.17257	0.901938	1.66901	1.1351	1.48613	1.51632	0.641612	0.676625	0.833347	0.672979	0.249787	-0.00904807	0.20298	0.235005	-0.827046	-1.01037	-0.373701
4.16	4.36186	1.75825	2.33026	1.15157	1.4809	2.03099	0.909617	1.64649	1.12286	1.45735	1.41544	0.621085	0.666583	0.871844	0.656692	0.257424	-0.0451143	0.1629	0.215341	-0.865934	-1.03983	-0.398347
4.64	4.39457	1.71811	2.29853	1.13565	1.47205	1.91267	0.926231	1.62801	1.11165	1.42276	1.32271	0.615526	0.650338	0.911662	0.643652	0.277853	-0.0703344	0.128608	0.197684	-0.907394	-1.04765	-0.430787
5.12	4.4122	1.71512	2.24817	1.13604	1.46514	1.84949	0.948451	1.62013	1.09955	1.38816	1.23791	0.621173	0.631361	0.942466	0.626894	0.291702	-0.0777786	0.106537	0.185136	-0.945359	-1.03114	-0.471811
5.6	4.43727	1.73893	2.18214	1.15262	1.46157	1.83761	0.973891	1.626	1.08017	1.35929	1.15169	0.631774	0.617792	0.948602	0.604494	0.281414	-0.0667154	0.100496	0.178579	-0.976009	-0.999017	-0.517667
6.08	4.47746	1.77097	2.11049	1.17894	1.46385	1.84661	1.00715	1.64296	1.05311	1.34059	1.05324	0.643398	0.613211	0.92528	0.580477	0.240446	-0.0426575	0.108692	0.174149	-0.998488	-0.964071	-0.565182
6.56	4.52596	1.78999	2.04762	1.20634	1.47108	1.84022	1.05534	1.6653	1.02279	1.33553	0.941129	0.665166	0.614299	0.880018	0.560155	0.181531	-0.0167152	0.122843	0.165187	-1.0166	-0.934607	-0.613032
7.04	4.55837	1.79436	2.00291	1.22318	1.48001	1.80367	1.11732	1.68647	1.00408	1.34247	0.820358	0.708878	0.613026	0.830486	0.548894	0.121995	0.0024296	0.132212	0.150311	-1.03519	-0.911889	-0.659814
7.52	4.55848	1.79467	1.97998	1.2154	1.48732	1.75629	1.1834	1.70243	1.007	1.35746	0.700743	0.780414	0.600579	0.792413	0.546697	0.074572	0.00692676	0.127923	0.13046	-1.05773	-0.893108	-0.70387
8	4.52626	1.8027	1.97491	1.1822	1.49683	1.7185	1.23851	1.71197	1.03441	1.37469	0.593225	0.869731	0.573894	0.769468	0.551306	0.0393587	-0.00444179	0.109157	0.110583	-1.08365	-0.87617	-0.744096
8.48	4.47355	1.82533	1.97961	1.13157	1.51374	1.69606	1.27243	1.71661	1.07542	1.38934	0.503869	0.953025	0.537963	0.753825	0.563073	0.00779257	-0.0292317	0.0814996	0.0953012	-1.1083	-0.861815	-0.779102
8.96	4.41842	1.85551	1.98244	1.07243	1.54578	1.67313	1.28199	1.72106	1.11618	1.39958	0.439188	1.00711	0.501036	0.736109	0.580697	-0.0290174	-0.0649456	0.0535127	0.083582	-1.12725	-0.854656	-0.805363
9.44	4.37167	1.88101	1.97785	1.01692	1.59455	1.62474	1.27669	1.72808	1.14294	1.40481	0.401092	1.02381	0.471974	0.714722	0.601264	-0.0718079	-0.105234	0.0315233	0.0718028	-1.13891	-0.856129	-0.82273
9.92	4.3295	1.89623	1.96383	0.971603	1.65484	1.54293	1.26796	1.73648	1.15105	1.40922	0.390849	1.01229	0.454053	0.698918	0.618969	-0.115346	-0.142107	0.0177879	0.0555773	-1.14269	-0.860203	-0.831692
10.4	4.28046	1.90736	1.9451	0.939821	1.7173	1.44612	1.26232	1.74263	1.14348	1.4142	0.399052	0.988609	0.4456	0.697468	0.627764	-0.155073	-0.166244	0.01145	0.0370432	-1.14127	-0.861368	-0.83489
10.88	4.21379	1.92638	1.9279	0.923015	1.77382	1.36193	1.26082	1.74316	1.13054	1.42378	0.408226	0.96443	0.441281	0.714073	0.624406	-0.190314	-0.171693	0.0108819	0.0233011	-1.13813	-0.859557	-0.837525
11.36	4.12818	1.95781	1.9156	0.918222	1.82203	1.30859	1.26151	1.73666	1.12396	1.44234	0.407488	0.937226	0.437319	0.7373	0.611425	-0.225125	-0.157678	0.0154789	0.0232605	-1.12994	-0.861465	-0.845025
11.84	4.03729	1.9967	1.9107	0.924556	1.86703	1.28543	1.25968	1.72665	1.13086	1.47155	0.386507	0.90099	0.434415	0.751618	0.599604	-0.263062	-0.130937	0.0226243	0.03922	-1.13363	-0.872837	-0.859508
12.32	3.95931	2.03053	1.90967	0.938531	1.91526	1.27413	1.25472	1.71827	1.15086	1.51179	0.347575	0.85178	0.435318	0.748379	0.598607	-0.299565	-0.099939	0.0298341	0.0662469	-1.1448	-0.896777	-0.879623
12.8	3.90631	2.0496	1.90967	0.966632	1.96783	1.25673	1.24766	1.71651	1.1755	1.55662	0.299849	0.796081	0.442405	0.733943	0.611707	-0.32191	-0.0734661	0.033862	0.0922292	-1.16497	-0.928701	-0.903309
13.28	3.87767	2.05295	1.91231	1.0129	2.02048	1.2211	1.24157	1.72127	1.19304	1.59644	0.253352	0.748525	0.456484	0.725029	0.633406	-0.316556	-0.055367	0.0332735	0.110664	-1.19261	-0.962143	-0.925212
13.76	3.85882	2.05308	1.92447	1.07487	2.06625	1.17409	1.23662	1.7288	1.19732	1.61999	0.209499	0.721667	0.474926	0.736552	0.653596	-0.276952	-0.0454952	0.0274212	0.117648	-1.22318	-0.991058	-0.942195
14.24	3.83507	2.06425	1.95086	1.14343	2.10047	1.12568	1.23124	1.73387	1.19082	1.62086	0.16698	0.718953	0.491931	0.774363	0.660584	-0.210105	-0.0400285	0.0179376	0.118036	-1.25189	-1.01772	-0.953096
14.72	3.80295	2.09629	1.98916	1.20131	2.12658	1.09085	1.22715	1.73198	1.18564	1.59783	0.11979	0.738527	0.504333	0.829666	0.653074	-0.133186	-0.0345323	0.00288801	0.11703	-1.27453	-1.04632	-0.9579
15.2	3.77281	2.14478	2.02708	1.23274	2.15128	1.07389	1.21963	1.72129	1.18825	1.55717	0.0710032	0.773528	0.510971	0.886115	0.637793	-0.0690033	-0.0235715	-0.0205858	0.116752	-1.29087	-1.08184	-0.958658
15.68	3.75829	2.19698	2.04649	1.23468	2.17876	1.07149	1.20909	1.70123	1.19938	1.50945	0.0233893	0.818927	0.512504	0.930736	0.625018	-0.0280857	-0.00452363	-0.0570378	0.114181	-1.30267	-1.12168	-0.956733
16.16	3.7702	2.24141	2.03328	1.21651	2.2085	1.06402	1.19019	1.67314	1.20733	1.46639	-0.0154544	0.869712	0.509185	0.958063	0.62047	-0.0112274	0.0223625	-0.106822	0.104123	-1.31197	-1.15955	-0.956355
16.64	3.79692	2.26885	1.98558	1.19678	2.23336	1.03272	1.16334	1.63785	1.19676	1.43641	-0.0424521	0.916494	0.499549	0.96742	0.619588	-0.0021216	0.050435	-0.167143	0.0814706	-1.31901	-1.1894	-0.959948
17.12	3.82063	2.28065	1.91916	1.18591	2.2483	0.966893	1.13164	1.5988	1.15578	1.41744	-0.0639098	0.946668	0.483349	0.959579	0.611463	0.0153185	0.0665936	-0.232309	0.0452387	-1.3253	-1.20862	-0.968507
17.6	3.81854	2.28214	1.84948	1.18248	2.25335	0.874523	1.10479	1.55884	1.08366	1.40214	-0.0941217	0.950043	0.461131	0.936491	0.586117	0.0495853	0.0605482	-0.297832	5.12155e-05	-1.3319	-1.21463	-0.981151
18.08	3.78978	2.28367	1.79521	1.18228	2.25404	0.784825	1.09117	1.52113	0.991437	1.37854	-0.143642	0.926651	0.438211	0.903038	0.547037	0.0953475	0.028374	-0.362542	-0.0463362	-1.34277	-1.20748	-0.992202
18.56	3.75275	2.29194	1.76336	1.18237	2.26022	0.727368	1.09447	1.48788	0.894635	1.33925	-0.211199	0.886667	0.421272	0.865801	0.506683	0.143695	-0.0232884	-0.427363	-0.0867072	-1.36026	-1.18873	-1.00016
19.04	3.72939	2.30644	1.75084	1.188	2.27313	0.724288	1.10839	1.45836	0.803057	1.28504	-0.288062	0.844375	0.415841	0.833922	0.482465	0.180036	-0.0794502	-0.490815	-0.116259	-1.38382	-1.15955	-1.00337
19.52	3.73391	2.32842	1.7487	1.20986	2.29387	0.761056	1.12398	1.43152	0.717256	1.22976	-0.35232	0.810309	0.423707	0.815361	0.485527	0.199752	-0.126418	-0.547944	-0.133752	-1.40996	-1.12783	-1.00513
20	3.76274	2.35495	1.74799	1.25358	2.31432	0.799546	1.13309	1.40736	0.633205	1.19151	-0.388598	0.785218	0.438096	0.811498	0.514483	0.207335	-0.15762	-0.59255	-0.142506	-1.43095	-1.10034	-1.01058
20.48	3.79997	2.37911	1.74241	1.30726	2.32759	0.80283	1.13635	1.38593	0.545349	1.186	-0.393745	0.766372	0.446678	0.817016	0.554617	0.207899	-0.176949	-0.621626	-0.148086	-1.44132	-1.0796	-1.0217
20.96	3.83352	2.3957	1.72682	1.35324	2.32546	0.760287	1.13737	1.36868	0.45491	1.21571	-0.387712	0.752382	0.439524	0.823205	0.592428	0.203629	-0.192097	-0.636654	-0.155956	-1.44064	-1.06379	-1.03764
21.44	3.85998	2.40071	1.7012	1.3716	2.3062	0.695505	1.14138	1.35744	0.370033	1.27152	-0.39362	0.74656	0.412567	0.825251	0.621736	0.191995	-0.208188	-0.643322	-0.170479	-1.4327	-1.04599	-1.05335
21.92	3.88609	2.39555	1.6706	1.36003	2.27106	0.64911	1.1475	1.35219	0.304599	1.33645	-0.432335	0.755298	0.37258	0.824929	0.646443	0.171516	-0.225322	-0.646379	-0.190582	-1.42205	-1.02225	-1.06671
22.4	3.91281	2.38337	1.64712	1.3336	2.22527	0.650508	1.1459	1.35204	0.272755	1.39326	-0.501384	0.776366	0.331409	0.824814	0.669423	0.14638	-0.23784	-0.646038	-0.21048	-1.41126	-0.990546	-1.07807
22.88	3.93027	2.37608	1.6415	1.31194	2.17525	0.701635	1.12483	1.35495	0.285004	1.42871	-0.585597	0.805619	0.301259	0.827284	0.691863	0.128628	-0.241346	-0.639739	-0.225291	-1.40022	-0.954166	-1.09221
23.36	3.9183	2.38195	1.66041	1.30983	2.12871	0.778206	1.08052	1.35946	0.33547	1.44148	-0.652463	0.835134	0.286124	0.829193	0.708988	0.124132	-0.236146	-0.624736	-0.231859	-1.38838	-0.915902	-1.11278
23.84	3.86687	2.40423	1.69508	1.32606	2.08881	0.842521	1.01675	1.36465	0.412966	1.43586	-0.679514	0.862999	0.282467	0.853221	0.716786	0.139682	-0.22769	-0.603866	-0.230583	-1.37742	-0.877964	-1.13946
24.32	3.78311	2.43949	1.73236	1.34712	2.05503	0.865628	0.948707	1.37077	0.49876	1.42484	-0.66665	0.890961	0.281906	0.836998	0.720134	0.165855	-0.223154	-0.584127	-0.226238	-1.37168	-0.843489	-1.16711
24.8	3.69248	2.4799	1.75976	1.35481	2.02392	0.845754	0.890797	1.37717	0.579346	1.41715	-0.639572	0.927808	0.278721	0.813021	0.728565	0.194815	-0.22804	-0.572504	-0.222016	-1.37373	-0.816838	-1.18932
25.28	3.62149	2.51544	1.77193	1.33712	1.98832	0.800092	0.856008	1.38342	0.650031	1.41287	-0.628256	0.975502	0.271092	0.788708	0.752929	0.219563	-0.243166	-0.570871	-0.222446	-1.38404	-0.802612	-1.20152
25.76	3.583	2.53816	1.77358	1.29858	1.94424	0.754536	0.843165	1.38806	0.716287	1.40568	-0.653163	1.02764	0.262237	0.769832	0.793943	0.239721	-0.264274	-0.576282	-0.229847	-1.40038	-0.807322	-1.20569
26.24	3.57346	2.5444	1.77557	1.2509	1.88904	0.724149	0.846857	1.39034	0.785605	1.38531	-0.710636	1.07283	0.253056	0.75749	0.84076	0.257009	-0.285684	-0.583356	-0.245551	-1.41763	-0.831107	-1.21144
26.72	3.58016	2.53489	1.77945	1.207	1.82736	0.713217	0.852584	1.3885	0.860288	1.34558	-0.779599	1.10308	0.239819	0.746866	0.876879	0.27519	-0.303619	-0.589974	-0.270289	-1.43141	-0.869041	-1.22461
27.2	3.59583	2.50856	1.78166	1.17552	1.76606	0.706789	0.846352	1.38382	0.934445	1.29246	-0.827388	1.11931	0.218408	0.728713	0.89354	0.290039	-0.317532	-0.598403	-0.302229	-1.43965	-0.911144	-1.24901
27.68	3.61618	2.46743	1.77282	1.16044	1.70972	0.68232	0.818863	1.37741	0.998354	1.23744	-0.833948	1.1289	0.188245	0.700296	0.892597	0.295985	-0.331364	-0.612623	-0.338111	-1.44311	-0.949456	-1.28075
28.16	3.64867	2.41048	1.75421	1.16152	1.66449	0.628926	0.770227	1.37317	1.04875	1.19345	-0.798948	1.13713	0.155931	0.66375	0.88229	0.287728	-0.349048	-0.636056	-0.372293	-1.44401	-0.979697	-1.31479
28.64	3.68757	2.34241	1.73546	1.17758	1.63141	0.55434	0.705099	1.37173	1.08827	1.16566	-0.739192	1.14534	0.132633	0.629142	0.868955	0.265502	-0.371934	-0.666105	-0.401246	-1.44286	-1.00286	-1.34538
29.12	3.7189	2.27067	1.72878	1.20885	1.61047	0.478414	0.63443	1.37114	1.12958	1.1488	-0.679165	1.15136	0.127636	0.606728	0.851271	0.235822	-0.396842	-0.696801	-0.424046	-1.43778	-1.02197	-1.37004
29.6	3.71931	2.20581	1.73825	1.25462	1.60144	0.427087	0.570817	1.36704	1.17944	1.13769	-0.637928	1.14981	0.141034	0.600379	0.828353	0.206106	-0.418699	-0.72071	-0.441845	-1.42757	-1.04085	-1.38793
30.08	3.67664	2.15423	1.75573	1.30814	1.60384	0.413267	0.518516	1.35589	1.24055	1.13147	-0.619275	1.13725	0.165835	0.606995	0.80615	0.183596	-0.433069	-0.734169	-0.456978	-1.41195	-1.06062	-1.39774
30.56	3.58895	2.11771	1.76491	1.36148	1.61717	0.427622	0.47549	1.33759	1.30389	1.13235	-0.616697	1.11607	0.192624	0.620007	0.796544	0.1674	-0.439364	-0.739458	-0.470504	-1.39573	-1.08196	-1.40079
31.04	3.4695	2.08991	1.75804	1.40936	1.63854	0.455648	0.43529	1.31685	1.35344	1.14279	-0.624388	1.09451	0.215467	0.631677	0.81574	0.155425	-0.439577	-0.744143	-0.482685	-1.38397	-1.10414	-1.39682
31.52	3.33535	2.06215	1.74123	1.4468	1.66147	0.48639	0.391244	1.3002	1.37258	1.15591	-0.643103	1.08342	0.234389	0.635432	0.866438	0.141342	-0.437898	-0.756455	-0.492007	-1.3803	-1.1251	-1.38796
32	3.20353	2.02539	1.72955	1.4764	1.68006	0.514726	0.342203	1.29003	1.35849	1.16043	-0.672418	1.08932	0.25237	0.62773	0.935785	0.123634	-0.435433	-0.780413	-0.497552	-1.38346	-1.14455	-1.37863
32.48	3.08922	1.97801	1.73553	1.50679	1.68789	0.545278	0.297188	1.28282	1.31443	1.14843	-0.712959	1.11355	0.271009	0.609013	1.003	0.106523	-0.431869	-0.815115	-0.500082	-1.38905	-1.16243	-1.37148
32.96	3.00338	1.925	1.75805	1.5484	1.68677	0.575861	0.263692	1.27151	1.25756	1.12426	-0.758102	1.14794	0.28813	0.580949	1.04984	0.0946322	-0.425497	-0.854011	-0.502373	-1.39251	-1.17915	-1.36735
33.44	2.94842	1.87362	1.78113	1.59734	1.67897	0.592438	0.24683	1.25126	1.2052	1.10101	-0.793644	1.1751	0.300317	0.550776	1.07136	0.0964328	-0.416119	-0.888539	-0.50557	-1.38992	-1.1975	-1.36387
33.92	2.92923	1.83149	1.78803	1.64164	1.66852	0.579109	0.247528	1.22354	1.17002	1.09071	-0.804417	1.18175	0.307784	0.528767	1.07591	0.121465	-0.40543	-0.913949	-0.511738	-1.38312	-1.22142	-1.3582
34.4	2.9442	1.79863	1.77066	1.66865	1.65662	0.52046	0.258917	1.19645	1.1542	1.09529	-0.788766	1.16403	0.314763	0.521646	1.07321	0.169149	-0.394727	-0.932724	-0.521533	-1.37674	-1.25124	-1.3521
34.88	2.98397	1.77322	1.73643	1.66847	1.64406	0.416257	0.273874	1.17903	1.14658	1.10283	-0.75687	1.13077	0.326322	0.528765	1.06486	0.230917	-0.387619	-0.951547	-0.533347	-1.3734	-1.28621	-1.35008
35.36	3.03141	1.74891	1.70025	1.64383	1.63005	0.279512	0.287103	1.17397	1.13455	1.09978	-0.729011	1.09742	0.333	0.543577	1.0468	0.291977	-0.387356	-0.974501	-0.545343	-1.37271	-1.32206	-1.35694
35.84	3.06591	1.71927	1.67192	1.60471	1.61876	0.133046	0.295914	1.17765	1.10768	1.07868	-0.725229	1.07552	0.338899	0.557556	1.01404	0.33921	-0.399282	-1.00092	-0.553459	-1.37163	-1.3561	-1.3724
36.32	3.07628	1.682	1.65263	1.56599	1.61505	-0.00134214	0.298829	1.18208	1.0648	1.04427	-0.751226	1.06489	0.340527	0.564675	0.96776	0.363264	-0.423524	-1.02496	-0.554931	-1.37068	-1.38556	-1.39373
36.8	3.05675	1.64088	1.63215	1.53972	1.62262	-0.102504	0.294718	1.18105	1.01286	1.01128	-0.794487	1.05786	0.339944	0.565038	0.919165	0.367129	-0.454363	-1.03929	-0.548301	-1.37239	-1.40967	-1.41663
37.28	3.01491	1.60381	1.60256	1.52981	1.63901	-0.151172	0.280718	1.17355	0.960778	0.988021	-0.828662	1.04523	0.342386	0.564743	0.882677	0.364082	-0.480741	-1.04135	-0.537609	-1.37954	-1.42581	-1.4375
37.76	2.95783	1.57371	1.56136	1.53216	1.65572	-0.13507	0.256899	1.16318	0.914407	0.975897	-0.831865	1.0251	0.354601	0.567816	0.86275	0.367798	-0.491543	-1.03349	-0.527712	-1.39432	-1.43494	-1.45869
38.24	2.8989	1.55118	1.51435	1.54128	1.66478	-0.0459759	0.226544	1.15417	0.871673	0.967726	-0.797268	1.00074	0.377914	0.569261	0.856461	0.387045	-0.481784	-1.02175	-0.524776	-1.41448	-1.43436	-1.48157
38.72	2.83202	1.52867	1.46596	1.55201	1.65994	0.105564	0.195942	1.1474	0.828678	0.956803	-0.73452	0.974972	0.40791	0.560862	0.853983	0.423466	-0.457159	-1.01193	-0.530144	-1.43358	-1.42858	-1.50405
39.2	2.75121	1.49655	1.41679	1.55907	1.64192	0.297019	0.171675	1.14227	0.787104	0.938421	-0.671282	0.949848	0.43443	0.535904	0.846411	0.471439	-0.429917	-1.00488	-0.540213	-1.44645	-1.42406	-1.52406
39.68	2.65365	1.44803	1.36163	1.5563	1.61528	0.494647	0.15422	1.13777	0.753178	0.916437	-0.63119	0.924477	0.44893	0.497159	0.83409	0.524502	-0.410267	-0.999225	-0.548801	-1.4533	-1.42517	-1.53665
40.16	2.54831	1.38522	1.29757	1.53986	1.58357	0.673214	0.140459	1.1335	0.731671	0.893737	-0.628143	0.90259	0.449528	0.459054	0.822319	0.576698	-0.399438	-0.992258	-0.549977	-1.45844	-1.43732	-1.54149
40.64	2.45989	1.31537	1.22255	1.50637	1.54732	0.817049	0.12226	1.1297	0.72189	0.870607	-0.657495	0.897451	0.439994	0.438435	0.81926	0.629444	-0.389457	-0.982408	-0.543027	-1.46832	-1.46096	-1.54038
41.12	2.40635	1.25069	1.14223	1.45108	1.50877	0.920905	0.0950424	1.12635	0.716216	0.84763	-0.701751	0.920465	0.426673	0.4408	0.825877	0.684136	-0.371858	-0.971313	-0.530799	-1.48748	-1.49043	-1.53807
41.6	2.39367	1.20181	1.06097	1.37473	1.47027	0.985684	0.0602896	1.11932	0.704665	0.820365	-0.742364	0.974625	0.414463	0.461717	0.839877	0.742097	-0.347341	-0.961057	-0.518058	-1.51443	-1.5185	-1.53524
42.08	2.39728	1.17473	0.987474	1.28027	1.43857	1.01587	0.0240799	1.10595	0.680297	0.787667	-0.767554	1.04512	0.403666	0.4842	0.852061	0.79726	-0.325775	-0.953553	-0.508463	-1.54225	-1.53939	-1.53171
42.56	2.39061	1.16585	0.926104	1.17179	1.419	1.02241	-0.00568503	1.08545	0.645083	0.750007	-0.778175	1.1068	0.39356	0.491875	0.858056	0.843971	-0.320234	-0.95022	-0.503024	-1.56262	-1.55145	-1.52534
43.04	2.35974	1.16868	0.880383	1.05965	1.41333	1.01687	-0.0270084	1.06018	0.607419	0.709227	-0.789607	1.14057	0.38582	0.483751	0.850712	0.876806	-0.3355	-0.951232	-0.501013	-1.56861	-1.55386	-1.5189
43.52	2.31386	1.17168	0.853343	0.945112	1.41318	1.01869	-0.0439372	1.03435	0.572738	0.667436	-0.816945	1.14405	0.385418	0.47047	0.829263	0.893215	-0.364779	-0.955139	-0.503141	-1.55982	-1.55212	-1.51764
44	2.28338	1.16482	0.84394	0.834897	1.40511	1.03148	-0.0624052	1.01153	0.541447	0.628755	-0.875376	1.13191	0.396701	0.467828	0.797926	0.894169	-0.395842	-0.957747	-0.507651	-1.54208	-1.54661	-1.52618
44.48	2.29978	1.1419	0.847055	0.730785	1.37793	1.04971	-0.0882773	0.992907	0.50765	0.595165	-0.966184	1.12126	0.418838	0.484536	0.764406	0.883486	-0.41751	-0.955803	-0.513675	-1.52338	-1.53844	-1.54339
44.96	2.36287	1.1072	0.853605	0.63653	1.33015	1.04863	-0.123116	0.977021	0.471755	0.569411	-1.07034	1.1229	0.444425	0.514875	0.73935	0.866532	-0.428317	-0.94665	-0.519275	-1.51249	-1.52839	-1.56185
45.44	2.44766	1.06709	0.857591	0.552523	1.26735	1.00299	-0.165105	0.962035	0.443061	0.549209	-1.15832	1.12682	0.460946	0.545628	0.727283	0.847207	-0.432346	-0.932205	-0.521691	-1.51232	-1.52141	-1.57459
45.92	2.51572	1.02689	0.854188	0.482786	1.20773	0.90762	-0.209417	0.946814	0.431972	0.531913	-1.20245	1.12171	0.461197	0.561982	0.725783	0.832278	-0.4338	-0.916542	-0.518939	-1.51875	-1.52022	-1.5806
46.4	2.54044	0.992188	0.845971	0.428641	1.16448	0.782067	-0.253131	0.931223	0.447038	0.514621	-1.18682	1.1	0.445698	0.56353	0.72586	0.824263	-0.433354	-0.905157	-0.510547	-1.5231	-1.52496	-1.58365
46.88	2.52105	0.961157	0.83742	0.394804	1.14836	0.661506	-0.292035	0.915772	0.478061	0.495219	-1.12056	1.06845	0.423145	0.559171	0.716515	0.82246	-0.428949	-0.899535	-0.500983	-1.51911	-1.53484	-1.58775
47.36	2.48083	0.931339	0.825579	0.380581	1.15615	0.577854	-0.323343	0.901192	0.506735	0.475689	-1.03119	1.0369	0.405838	0.559608	0.692744	0.827397	-0.420637	-0.896503	-0.494677	-1.50405	-1.54548	-1.59736
47.84	2.44006	0.904385	0.807499	0.380697	1.17895	0.533527	-0.342808	0.888834	0.512968	0.45821	-0.942318	1.00744	0.402064	0.569099	0.655489	0.834599	-0.412747	-0.890252	-0.494928	-1.48375	-1.55588	-1.609
48.32	2.41032	0.881381	0.780822	0.381176	1.20005	0.496317	-0.349151	0.881063	0.490163	0.44489	-0.869033	0.97607	0.409872	0.578632	0.615295	0.842688	-0.412756	-0.876171	-0.504302	-1.46381	-1.56261	-1.61739
48.8	2.39108	0.863307	0.743678	0.371443	1.20533	0.429251	-0.345716	0.879943	0.453202	0.438985	-0.811796	0.93412	0.421627	0.57274	0.584502	0.851871	-0.424397	-0.852848	-0.521638	-1.45019	-1.5661	-1.6187
49.28	2.37956	0.850936	0.701214	0.342994	1.18567	0.310847	-0.338307	0.884347	0.429715	0.442787	-0.76239	0.88145	0.430475	0.540041	0.570867	0.862403	-0.445264	-0.822798	-0.545521	-1.44416	-1.56503	-1.61399
49.76	2.37414	0.842251	0.661776	0.297491	1.14505	0.158398	-0.331389	0.891467	0.441675	0.459375	-0.723769	0.830836	0.434565	0.482483	0.572543	0.875034	-0.465923	-0.789691	-0.574211	-1.44252	-1.56034	-1.60859
50.24	2.38907	0.833703	0.63373	0.245356	1.0973	0.0154713	-0.327201	0.896741	0.488056	0.488496	-0.702062	0.800341	0.435622	0.411734	0.583609	0.88754	-0.476701	-0.756355	-0.607677	-1.44191	-1.55218	-1.60557
50.72	2.43024	0.825899	0.619406	0.193971	1.05509	-0.081644	-0.32312	0.897895	0.545581	0.524129	-0.701337	0.800553	0.438403	0.343575	0.592277	0.89812	-0.473461	-0.724553	-0.645114	-1.43905	-1.54436	-1.60538
51.2	2.49756	0.82185	0.616633	0.154096	1.02766	-0.133919	-0.312012	0.895935	0.58569	0.559099	-0.72124	0.826147	0.440588	0.286519	0.589943	0.907724	-0.457024	-0.69468	-0.684131	-1.43533	-1.53934	-1.60496
51.68	2.57341	0.821303	0.619833	0.130226	1.01266	-0.173968	-0.289029	0.893703	0.587824	0.589082	-0.745589	0.85745	0.43682	0.241614	0.573235	0.916252	-0.43531	-0.66602	-0.721725	-1.43217	-1.5377	-1.6019
52.16	2.6407	0.824889	0.625498	0.120131	1.00125	-0.245924	-0.252023	0.893101	0.554457	0.615196	-0.75504	0.876835	0.423114	0.204115	0.543224	0.931301	-0.415154	-0.638554	-0.752089	-1.41913	-1.54093	-1.59764
52.64	2.68593	0.825997	0.636555	0.12511	0.984294	-0.361818	-0.202795	0.892029	0.502986	0.644973	-0.736596	0.87331	0.400498	0.169743	0.504452	0.960675	-0.401033	-0.612715	-0.770735	-1.42388	-1.54705	-1.5956
53.12	2.70728	0.817902	0.656842	0.147871	0.957719	-0.497363	-0.148345	0.885301	0.448746	0.682835	-0.692491	0.855586	0.377381	0.139002	0.466446	1.00477	-0.394758	-0.588613	-0.775118	-1.42978	-1.55667	-1.59938
53.6	2.71192	0.798709	0.686379	0.185161	0.930873	-0.608498	-0.0958452	0.870285	0.393384	0.727923	-0.641929	0.837507	0.363949	0.113357	0.439397	1.06419	-0.392367	-0.565821	-0.766068	-1.43252	-1.56919	-1.60942
54.08	2.70289	0.773285	0.72491	0.225561	0.90069	-0.666699	-0.0490315	0.848903	0.328818	0.767996	-0.605981	0.833834	0.367714	0.0956813	0.432364	1.13248	-0.388885	-0.545753	-0.749151	-1.4287	-1.5844	-1.62275
54.56	2.67551	0.749665	0.762613	0.254415	0.866163	-0.681994	-0.0096791	0.828643	0.245848	0.788582	-0.599209	0.845947	0.385224	0.085603	0.44811	1.20654	-0.380594	-0.53068	-0.73143	-1.41983	-1.59975	-1.63586
55.04	2.62946	0.735739	0.792211	0.252387	0.856005	-0.696471	0.0217039	0.816828	0.153035	0.784672	-0.620989	0.862357	0.406221	0.08278	0.485313	1.27599	-0.366623	-0.520778	-0.720028	-1.41001	-1.6089	-1.646
55.52	2.56641	0.734607	0.809361	0.214191	0.853365	-0.747072	0.0469615	0.81666	0.0791943	0.761446	-0.659574	0.871886	0.421078	0.0845636	0.53376	1.33699	-0.352075	-0.514903	-0.715039	-1.40584	-1.60853	-1.65476
56	2.5092	0.742139	0.816512	0.151326	0.850926	-0.830977	0.0662654	0.825144	0.059342	0.73403	-0.703808	0.863493	0.423856	0.0887792	0.581609	1.38307	-0.343983	-0.509174	-0.716075	-1.4118	-1.60258	-1.66153
56.48	2.48184	0.750627	0.819456	0.0875569	0.844069	-0.910173	0.0812818	0.835412	0.110499	0.717804	-0.743427	0.838129	0.416949	0.0929631	0.616903	1.4152	-0.344916	-0.499936	-0.716255	-1.42798	-1.59783	-1.66742
56.96	2.49608	0.753552	0.824856	0.0455135	0.830393	-0.937617	0.0879573	0.842724	0.222545	0.719356	-0.778216	0.80346	0.406063	0.094631	0.634127	1.43811	-0.352171	-0.484901	-0.712922	-1.44992	-1.60474	-1.67066
57.44	2.53244	0.743262	0.830098	0.0377592	0.811154	-0.895443	0.0819453	0.845894	0.355562	0.73629	-0.804468	0.772683	0.396122	0.0922222	0.633757	1.45242	-0.35707	-0.465192	-0.705041	-1.47024	-1.62349	-1.67109
57.92	2.5534	0.718808	0.832942	0.0613868	0.789132	-0.810804	0.0633923	0.847521	0.46987	0.757339	-0.826322	0.755365	0.38736	0.0863625	0.625126	1.4641	-0.352278	-0.444886	-0.696999	-1.4862	-1.65014	-1.66886
58.4	2.53189	0.681473	0.830917	0.0958216	0.763679	-0.736259	0.0337505	0.849153	0.543659	0.769637	-0.83692	0.753878	0.377407	0.080861	0.616486	1.47173	-0.33689	-0.42809	-0.691599	-1.49937	-1.6748	-1.66507
58.88	2.46782	0.635423	0.822884	0.127156	0.735329	-0.710608	-0.0029808	0.849878	0.579115	0.767175	-0.829315	0.76236	0.363003	0.0808776	0.615555	1.4721	-0.318459	-0.416383	-0.691802	-1.51392	-1.69776	-1.65999
59.36	2.39185	0.587096	0.814169	0.148809	0.699498	-0.728959	-0.0426499	0.846376	0.594914	0.747742	-0.794472	0.767878	0.34274	0.0918579	0.62485	1.4612	-0.30682	-0.408059	-0.695284	-1.53228	-1.72273	-1.65422
59.84	2.3528	0.543875	0.808653	0.163717	0.656255	-0.754552	-0.0853294	0.837677	0.609043	0.716288	-0.727415	0.759812	0.319324	0.113926	0.646116	1.43638	-0.307012	-0.399417	-0.697896	-1.55404	-1.75507	-1.64753
60.32	2.36944	0.509053	0.809663	0.186622	0.607942	-0.742787	-0.130759	0.826629	0.625299	0.680277	-0.633807	0.73687	0.29604	0.144579	0.676036	1.4033	-0.316038	-0.387858	-0.69911	-1.57246	-1.79626	-1.64191
60.8	2.42909	0.485769	0.817344	0.225088	0.556964	-0.676508	-0.176582	0.820335	0.636608	0.648658	-0.529164	0.704239	0.272712	0.173797	0.706663	1.36656	-0.324204	-0.373156	-0.700558	-1.58236	-1.8358	-1.63924
61.28	2.49541	0.469375	0.827031	0.277934	0.510074	-0.566233	-0.216914	0.823709	0.630838	0.626421	-0.433694	0.670154	0.250219	0.190204	0.734994	1.33309	-0.324428	-0.35772	-0.704724	-1.58252	-1.85859	-1.6403
61.76	2.54554	0.455057	0.831869	0.333735	0.470657	-0.435633	-0.243456	0.836105	0.611279	0.614219	-0.359831	0.642302	0.227154	0.18316	0.753215	1.30405	-0.317269	-0.344259	-0.712556	-1.62104	-1.85652	-1.64437
62.24	2.58738	0.4413	0.825431	0.375157	0.440152	-0.295121	-0.249541	0.849115	0.585886	0.606208	-0.311117	0.623762	0.204347	0.149808	0.755709	1.27563	-0.298322	-0.334818	-0.72176	-1.61171	-1.8341	-1.64935
62.72	2.6459	0.42745	0.804382	0.392189	0.418289	-0.144366	-0.237639	0.853186	0.563392	0.591169	-0.278012	0.610802	0.182975	0.0993208	0.740884	1.24736	-0.296774	-0.327298	-0.730417	-1.60462	-1.80652	-1.65161
63.2	2.74169	0.415542	0.769657	0.381005	0.401385	0.0178811	-0.214218	0.842451	0.53935	0.560991	-0.249077	0.601131	0.16625	0.0495577	0.708694	1.21566	-0.302733	-0.318646	-0.736206	-1.60029	-1.79489	-1.65107
63.68	2.86388	0.406283	0.726149	0.347881	0.389398	0.181146	-0.188441	0.820277	0.503554	0.511624	-0.215836	0.595	0.156213	0.0231182	0.662539	1.18328	-0.31078	-0.306334	-0.73899	-1.59658	-1.80795	-1.65068
64.16	2.97688	0.396393	0.682211	0.300246	0.376982	0.318911	-0.163489	0.796239	0.449033	0.448981	-0.182174	0.589108	0.151177	0.0319607	0.608964	1.1512	-0.314828	-0.291304	-0.739346	-1.59099	-1.84185	-1.65358
64.64	3.04599	0.384624	0.644926	0.245796	0.360637	0.411615	-0.136871	0.77952	0.381609	0.380739	-0.159124	0.577301	0.149991	0.0729058	0.556385	1.1186	-0.312036	-0.277313	-0.736225	-1.58145	-1.88189	-1.66207
65.12	3.0637	0.365228	0.616805	0.188022	0.334101	0.467691	-0.103601	0.773316	0.315407	0.312305	-0.158077	0.554179	0.152125	0.130414	0.513484	1.08644	-0.302335	-0.269217	-0.728151	-1.56808	-1.91292	-1.67415
65.6	3.05381	0.339458	0.601266	0.128237	0.295104	0.518754	-0.0609594	0.773563	0.265748	0.24587	-0.18251	0.512298	0.158537	0.18405	0.483246	1.05239	-0.291974	-0.268701	-0.714224	-1.55236	-1.92778	-1.68575
66.08	3.04704	0.314119	0.596203	0.0667664	0.244965	0.59482	-0.011043	0.772205	0.282202	0.181404	-0.2285	0.456576	0.17154	0.218305	0.462308	1.01917	-0.284404	-0.274745	-0.696058	-1.53401	-1.92889	-1.69156
66.56	3.06027	0.295649	0.601545	0.00425343	0.188456	0.697159	0.0409376	0.765306	0.250165	0.118579	-0.28354	0.399308	0.190435	0.229966	0.441548	0.98871	-0.280647	-0.283137	-0.677846	-1.51321	-1.92577	-1.68939
67.04	3.07849	0.288207	0.617243	-0.0586677	0.132302	0.794793	0.0884685	0.7548	0.215342	0.0620394	-0.33832	0.356047	0.213577	0.226997	0.411331	0.959957	-0.279728	-0.291071	-0.663597	-1.49106	-1.92798	-1.6832
67.52	3.07342	0.28977	0.643803	-0.112949	0.0822076	0.847794	0.128641	0.746702	0.173625	0.0150972	-0.382862	0.335723	0.234189	0.222192	0.368983	0.933637	-0.278961	-0.299181	-0.651654	-1.46756	-1.9423	-1.67672
68	3.02476	0.289929	0.682751	-0.156303	0.0414175	0.836192	0.160559	0.744969	0.136774	-0.0198445	-0.417612	0.331441	0.249734	0.224785	0.320791	0.906447	-0.277216	-0.310993	-0.638018	-1.44552	-1.96453	-1.67397
68.48	2.9352	0.279148	0.730461	-0.179884	0.00897823	0.771975	0.181475	0.747544	0.114624	-0.0465782	-0.442699	0.323711	0.260827	0.237018	0.279896	0.88036	-0.273247	-0.329799	-0.620609	-1.42575	-1.98526	-1.67659
68.96	2.82759	0.252415	0.780271	-0.18228	-0.0164313	0.690829	0.190495	0.748006	0.115757	-0.0709636	-0.466872	0.29751	0.269987	0.256031	0.257238	0.856642	-0.26738	-0.356494	-0.602185	-1.40841	-1.99243	-1.68411
69.44	2.7332	0.216226	0.831983	-0.167738	-0.0373576	0.622689	0.186643	0.740911	0.136104	-0.0477805	-0.487066	0.249583	0.280094	0.276035	0.257011	0.838517	-0.261038	-0.387166	-0.588948	-1.39204	-1.98252	-1.69219
69.92	2.66675	0.180461	0.881849	-0.152609	-0.0553796	0.578273	0.17552	0.725963	0.165982	-0.0746122	-0.499429	0.195278	0.289198	0.291912	0.270959	0.827336	-0.257155	-0.415806	-0.587853	-1.37444	-1.9593	-1.70172
70.4	2.62389	0.159153	0.928288	-0.15026	-0.0718386	0.552286	0.166581	0.708508	0.200476	-0.093539	-0.493271	0.15463	0.289332	0.301625	0.288887	0.820161	-0.259453	-0.438372	-0.5996	-1.35492	-1.93596	-1.71249
70.88	2.58604	0.157081	0.964824	-0.166119	-0.0876761	0.533377	0.167686	0.696738	0.243	-0.0981635	-0.458507	0.140701	0.272777	0.306868	0.303966	0.808049	-0.270613	-0.456055	-0.618429	-1.33545	-1.92258	-1.7245
71.36	2.53715	0.173256	0.98229	-0.187669	-0.104454	0.519173	0.182473	0.693573	0.294564	-0.086186	-0.391978	0.147756	0.235572	0.312706	0.316289	0.783328	-0.289578	-0.474217	-0.636355	-1.31719	-1.92521	-1.73667
71.84	2.46956	0.197895	0.972303	-0.201201	-0.126883	0.511859	0.207828	0.69451	0.355198	-0.0657348	-0.306655	0.156028	0.182711	0.322326	0.32862	0.745483	-0.312502	-0.498352	-0.647647	-1.30475	-1.93731	-1.74722
72.32	2.38781	0.223318	0.930441	-0.188062	-0.153742	0.504597	0.238411	0.692719	0.412703	-0.0449881	-0.218701	0.147354	0.127275	0.336733	0.344947	0.700077	-0.333522	-0.530142	-0.652701	-1.30042	-1.9504	-1.75421
72.8	2.31049	0.244494	0.863519	-0.146089	-0.1862	0.481471	0.268575	0.683106	0.455502	-0.0302908	-0.147337	0.118125	0.0840075	0.354495	0.365747	0.657148	-0.347956	-0.567242	-0.655056	-1.3034	-1.95749	-1.75647
73.28	2.25354	0.263139	0.784022	-0.0841188	-0.223291	0.423057	0.297523	0.667837	0.468862	-0.0213009	-0.101738	0.0806745	0.0614382	0.369933	0.388349	0.624707	-0.354296	-0.602392	-0.65838	-1.30863	-1.95776	-1.75535
73.76	2.22755	0.278325	0.70819	-0.0205841	-0.262447	0.326778	0.323927	0.653254	0.450671	-0.0152973	-0.076259	0.0524179	0.0586397	0.382611	0.41327	0.603369	-0.352002	-0.631559	-0.662845	-1.31139	-1.95932	-1.75183
74.24	2.23525	0.287357	0.645364	0.0307533	-0.296371	0.217188	0.319427	0.645572	0.411616	-0.00706968	-0.0552	0.0422297	0.0658488	0.391189	0.440212	0.591798	-0.342077	-0.653056	-0.668094	-1.30812	-1.96718	-1.7463
74.72	2.26442	0.286803	0.602031	0.0625227	-0.320304	0.127629	0.318171	0.6445	0.363157	0.00280382	-0.018972	0.0463912	0.069988	0.400944	0.469977	0.586763	-0.325099	-0.668348	-0.67276	-1.29667	-1.98205	-1.73926
75.2	2.29906	0.276873	0.579863	0.0728145	-0.331886	0.0931918	0.305086	0.645051	0.317867	0.0143986	0.0432205	0.0505523	0.061766	0.416523	0.497722	0.587231	-0.300163	-0.679987	-0.676441	-1.27821	-1.99648	-1.73244
75.68	2.32722	0.261985	0.578944	0.0610862	-0.332484	0.117489	0.287501	0.640551	0.282884	0.0260741	0.128653	0.0476509	0.0399325	0.439988	0.515325	0.596742	-0.268152	-0.689056	-0.680498	-1.25425	-2.00134	-1.72512
76.16	2.34693	0.248862	0.594699	0.0244284	-0.327653	0.175628	0.276932	0.628376	0.258673	0.03522	0.233282	0.0419704	0.0110586	0.470046	0.515461	0.612323	-0.228858	-0.696182	-0.681953	-1.22523	-1.99542	-1.71801
76.64	2.3604	0.239975	0.620011	-0.0290912	-0.322993	0.230964	0.280181	0.612657	0.239617	0.0436492	0.346128	0.046181	-0.0126847	0.500259	0.496804	0.630834	-0.183826	-0.701929	-0.678463	-1.19064	-1.98758	-1.71138
77.12	2.36675	0.229611	0.640412	-0.0899778	-0.322952	0.256987	0.29567	0.600266	0.219034	0.0517183	0.455024	0.0696227	-0.0236556	0.522739	0.471175	0.638549	-0.137001	-0.709656	-0.667518	-1.15035	-1.98752	-1.70532
77.6	2.36142	0.20789	0.645229	-0.140776	-0.32722	0.257504	0.31626	0.596039	0.193719	0.059139	0.549212	0.108913	-0.0220531	0.531717	0.451644	0.62662	-0.0910839	-0.723017	-0.650319	-1.10607	-2.00054	-1.69948
78.08	2.33389	0.165811	0.629817	-0.165767	-0.334839	0.260248	0.332594	0.600838	0.161319	0.065	0.618083	0.154151	-0.0142836	0.522222	0.450592	0.595084	-0.0502664	-0.741643	-0.630592	-1.06193	-2.01993	-1.69187
78.56	2.28156	0.100855	0.603337	-0.168321	-0.343025	0.296804	0.344772	0.611402	0.122343	0.0703196	0.665728	0.192977	-0.00937535	0.493686	0.469117	0.552374	-0.0174338	-0.760416	-0.614284	-1.02277	-2.03177	-1.68299
79.04	2.21161	0.0213666	0.581028	-0.155304	-0.356497	0.381559	0.357926	0.623626	0.0793849	0.075801	0.698068	0.220914	-0.0130289	0.449663	0.498537	0.511	0.00965148	-0.771421	-0.602992	-0.993865	-2.02529	-1.67226
79.52	2.13131	-0.0581082	0.572797	-0.145865	-0.376188	0.498367	0.379732	0.635205	0.037079	0.084465	0.726811	0.240403	-0.0258912	0.399497	0.524678	0.480589	0.0346746	-0.769307	-0.595362	-0.976454	-1.99536	-1.66085
80	2.05277	-0.124166	0.577164	-0.15318	-0.404362	0.611999	0.412732	0.645219	-0.00603378	0.102536	0.756787	0.255769	-0.0409511	0.356058	0.536539	0.459748	0.0631012	-0.755799	-0.588715	-0.965632	-1.95004	-1.64927
80.48	1.97802	-0.169559	0.585473	-0.179509	-0.436812	0.684381	0.451031	0.65408	-0.0476155	0.133583	0.780976	0.269181	-0.0522499	0.329847	0.529848	0.442269	0.0949043	-0.739385	-0.581793	-0.956494	-1.90203	-1.63634
80.96	1.90392	-0.193514	0.58421	-0.216019	-0.467214	0.703032	0.48434	0.660991	-0.0899972	0.177018	0.787198	0.281408	-0.0557697	0.324877	0.509461	0.422649	0.127384	-0.728605	-0.574667	-0.943231	-1.86233	-1.62095
81.44	1.82855	-0.206428	0.568825	-0.250218	-0.491127	0.680717	0.502458	0.664647	-0.12951	0.224785	0.765632	0.29778	-0.0523042	0.337975	0.482091	0.401349	0.154114	-0.727533	-0.568256	-0.925455	-1.83106	-1.60089
81.92	1.74941	-0.21623	0.543535	-0.270582	-0.505242	0.650097	0.501315	0.664241	-0.162023	0.264363	0.717484	0.325212	-0.0444565	0.356665	0.454145	0.387113	0.170921	-0.731019	-0.561415	-0.907303	-1.80343	-1.57649
82.4	1.67095	-0.229645	0.517004	-0.269562	-0.514972	0.64288	0.488254	0.660314	-0.179423	0.286463	0.665303	0.368027	-0.0336376	0.36916	0.42836	0.385927	0.17836	-0.72994	-0.551956	-0.893004	-1.77666	-1.5511
82.88	1.59573	-0.254254	0.495767	-0.24877	-0.52527	0.672689	0.473213	0.655327	-0.1746	0.287279	0.633847	0.423563	-0.0190057	0.368361	0.402923	0.399074	0.183098	-0.718184	-0.536578	-0.885228	-1.74902	-1.52773
83.36	1.53401	-0.292991	0.480145	-0.21426	-0.541349	0.727723	0.469453	0.650845	-0.147065	0.276543	0.640342	0.480726	0.00016804	0.359924	0.374473	0.418479	0.189896	-0.696631	-0.51524	-0.880221	-1.72581	-1.50755
83.84	1.4889	-0.346894	0.466819	-0.170205	-0.560522	0.778853	0.485872	0.646055	-0.102764	0.267139	0.684052	0.529932	0.0219437	0.352965	0.342352	0.434408	0.201611	-0.673052	-0.492306	-0.871332	-1.71028	-1.48798
84.32	1.46585	-0.412353	0.450639	-0.131329	-0.57809	0.799193	0.528432	0.640111	-0.0480891	0.267501	0.750343	0.568935	0.0433604	0.360216	0.308534	0.443371	0.216858	-0.655496	-0.472627	-0.852562	-1.70069	-1.46563
84.8	1.4672	-0.483281	0.430997	-0.105586	-0.58927	0.787696	0.597026	0.631458	0.00711682	0.277636	0.811988	0.605835	0.059174	0.384439	0.277143	0.449686	0.231973	-0.646489	-0.45741	-0.822146	-1.69036	-1.43771
85.28	1.49055	-0.551499	0.404782	-0.104674	-0.593276	0.760173	0.683208	0.621299	0.0563445	0.288884	0.848954	0.650217	0.0661992	0.416411	0.251375	0.464107	0.246136	-0.641807	-0.445738	-0.783361	-1.67197	-1.40613
85.76	1.53768	-0.607866	0.376626	-0.131376	-0.591629	0.748091	0.773392	0.611762	0.0929614	0.292954	0.847717	0.702494	0.0647175	0.445572	0.230761	0.492622	0.258344	-0.635595	-0.431434	-0.742786	-1.64366	-1.37487
86.24	1.60162	-0.645101	0.351473	-0.182012	-0.589023	0.764505	0.856361	0.604931	0.111939	0.287297	0.81183	0.753817	0.0575951	0.461075	0.209399	0.533634	0.26833	-0.624477	-0.412889	-0.703088	-1.61539	-1.34721
86.72	1.68331	-0.658647	0.332074	-0.244762	-0.587148	0.80704	0.925184	0.601605	0.104458	0.2779	0.757401	0.792177	0.0485372	0.459824	0.180325	0.576097	0.272806	-0.609812	-0.39082	-0.665211	-1.59266	-1.32557
87.2	1.77243	-0.648888	0.318843	-0.305333	-0.585574	0.848602	0.978474	0.600363	0.0659646	0.273966	0.708451	0.813664	0.0415994	0.446996	0.140552	0.605552	0.268768	-0.595326	-0.370382	-0.625657	-1.58805	-1.30743
87.68	1.8613	-0.622442	0.312257	-0.348046	-0.5821	0.855883	1.01763	0.59963	-0.00297878	0.276948	0.684843	0.824983	0.0382076	0.428705	0.0928001	0.621145	0.255045	-0.584899	-0.355236	-0.581053	-1.60078	-1.29134
88.16	1.93477	-0.587316	0.309453	-0.370088	-0.5746	0.816999	1.04013	0.598671	-0.0893345	0.281703	0.692639	0.838483	0.0383862	0.408753	0.0414736	0.623309	0.23379	-0.575941	-0.345563	-0.53111	-1.62776	-1.27393
88.64	1.97762	-0.55529	0.303375	-0.373955	-0.561383	0.741087	1.04477	0.596931	-0.175228	0.282356	0.721715	0.856866	0.0408466	0.386675	-0.00404835	0.62262	0.210645	-0.56395	-0.336965	-0.477978	-1.6599	-1.25642
89.12	1.97991	-0.532112	0.291684	-0.368914	-0.544208	0.654846	1.03021	0.595717	-0.241587	0.276894	0.750876	0.871664	0.0442541	0.365253	-0.0433522	0.623084	0.190101	-0.546371	-0.3244	-0.426613	-1.68898	-1.24015
89.6	1.94079	-0.520328	0.271892	-0.366435	-0.529021	0.584801	1.00332	0.595672	-0.279391	0.270971	0.754479	0.868812	0.0475672	0.349612	-0.0772123	0.627884	0.172115	-0.521831	-0.307079	-0.380889	-1.70639	-1.22323
90.08	1.87317	-0.516246	0.243216	-0.374017	-0.519852	0.543146	0.97991	0.597913	-0.287821	0.271766	0.719886	0.841593	0.0481045	0.347238	-0.110802	0.634343	0.154576	-0.493547	-0.288422	-0.343811	-1.71209	-1.20374
90.56	1.79746	-0.511539	0.207456	-0.389419	-0.518332	0.524589	0.974125	0.602093	-0.272683	0.284594	0.649236	0.800508	0.0442153	0.360457	-0.143171	0.641867	0.137908	-0.465354	-0.272786	-0.316251	-1.70495	-1.18141
91.04	1.73405	-0.500347	0.171362	-0.414446	-0.523687	0.508057	0.998663	0.608357	-0.240687	0.305417	0.554239	0.76451	0.0351479	0.385731	-0.170839	0.645072	0.125532	-0.439138	-0.261823	-0.296608	-1.69024	-1.15997
91.52	1.69558	-0.477632	0.13778	-0.453055	-0.532478	0.472119	1.05075	0.615213	-0.19812	0.324713	0.455591	0.7499	0.0213138	0.411542	-0.188444	0.640512	0.123699	-0.41484	-0.256215	-0.281872	-1.67489	-1.14825
92	1.68506	-0.447312	0.109931	-0.502463	-0.539542	0.407197	1.11889	0.620553	-0.15571	0.333483	0.360291	0.75927	0.00714166	0.426991	-0.19421	0.624097	0.133695	-0.390447	-0.249514	-0.268394	-1.66376	-1.14949
92.48	1.69197	-0.416668	0.0853416	-0.556779	-0.543906	0.315758	1.19052	0.621694	-0.120741	0.330571	0.271485	0.783478	-0.00129973	0.430666	-0.189766	0.597576	0.1531	-0.364656	-0.240901	-0.253751	-1.65934	-1.16287
92.96	1.70284	-0.394285	0.0595458	-0.604796	-0.542323	0.209996	1.25837	0.617956	-0.0990213	0.319586	0.186592	0.809853	0.000797756	0.426749	-0.183974	0.565863	0.174231	-0.337558	-0.231598	-0.23849	-1.65831	-1.17931
93.44	1.70469	-0.382199	0.025668	-0.632469	-0.533289	0.106151	1.32204	0.610648	-0.0995132	0.311027	0.103813	0.830674	0.01526	0.426237	-0.18255	0.53686	0.189715	-0.311214	-0.225171	-0.223167	-1.6566	-1.19019
93.92	1.69412	-0.373928	-0.0180337	-0.636388	-0.51536	0.0131901	1.38157	0.603228	-0.119537	0.313685	0.0242176	0.841915	0.0377881	0.434747	-0.188714	0.516313	0.198787	-0.286126	-0.223061	-0.210919	-1.65142	-1.19021
94.4	1.6777	-0.358746	-0.0675558	-0.626078	-0.491431	-0.0700043	1.43428	0.599817	-0.152223	0.329806	-0.0505246	0.843845	0.0601727	0.44997	-0.201416	0.50253	0.204975	-0.264954	-0.224271	-0.202498	-1.64848	-1.1822
94.88	1.67503	-0.328306	-0.114168	-0.62615	-0.465352	-0.149495	1.4749	0.600177	-0.191855	0.353002	-0.118974	0.831411	0.0750511	0.462497	-0.217711	0.486338	0.21366	-0.245439	-0.223409	-0.198072	-1.65269	-1.17248
95.36	1.69638	-0.286413	-0.144614	-0.653432	-0.443651	-0.232989	1.49829	0.601926	-0.224294	0.375186	-0.182456	0.801928	0.0813593	0.464507	-0.232365	0.458109	0.228609	-0.225075	-0.216247	-0.195804	-1.66566	-1.16643
95.84	1.73725	-0.245166	-0.153813	-0.71142	-0.429025	-0.32005	1.50616	0.600472	-0.23893	0.390185	-0.242042	0.755978	0.0850699	0.455708	-0.242058	0.420019	0.24829	-0.201997	-0.204232	-0.193732	-1.68749	-1.16511
96.32	1.78082	-0.219623	-0.146154	-0.783085	-0.423398	-0.400381	1.50951	0.594011	-0.22448	0.396094	-0.298647	0.704263	0.0954817	0.440645	-0.244721	0.384779	0.269216	-0.174175	-0.192085	-0.187662	-1.71386	-1.16577
96.8	1.80914	-0.215911	-0.132064	-0.844417	-0.423222	-0.463919	1.52171	0.584294	-0.176237	0.394537	-0.35256	0.660821	0.117825	0.428776	-0.243283	0.368683	0.287758	-0.142609	-0.185328	-0.176402	-1.73567	-1.16495
97.28	1.81692	-0.224976	-0.120649	-0.886506	-0.423125	-0.50478	1.55091	0.576221	-0.0961815	0.388482	-0.396099	0.632948	0.149517	0.426856	-0.24161	0.385961	0.301273	-0.109503	-0.187873	-0.156888	-1.74897	-1.16176
97.76	1.81302	-0.228933	-0.117074	-0.919734	-0.423098	-0.532336	1.59607	0.573912	0.00462989	0.37766	-0.432596	0.622402	0.177734	0.433937	-0.247256	0.435937	0.3106	-0.0795584	-0.183653	-0.131341	-1.75454	-1.15726
98.24	1.81014	-0.212499	-0.117385	-0.966136	-0.42264	-0.558699	1.64555	0.578757	0.107952	0.35888	-0.458868	0.620275	0.191035	0.44669	-0.268448	0.505219	0.315348	-0.0548975	-0.196145	-0.102357	-1.75797	-1.15411
98.72	1.81953	-0.174683	-0.115166	-1.03927	-0.421752	-0.593315	1.685	0.588323	0.193807	0.328392	-0.482596	0.611335	0.18594	0.459389	-0.305233	0.57206	0.316427	-0.0374108	-0.204897	-0.0751055	-1.76173	-1.15175
99.2	1.8404	-0.124648	-0.10756	-1.13599	-0.418593	-0.638373	1.70783	0.597179	0.250629	0.287138	-0.511087	0.582879	0.168173	0.470245	-0.350695	0.618673	0.317859	-0.0264367	-0.203861	-0.0524082	-1.76353	-1.15055
99.68	1.86851	-0.0764251	-0.0957521	-1.23891	-0.411694	-0.685687	1.71522	0.602164	0.273364	0.242014	-0.547877	0.53156	0.152995	0.478427	-0.39368	0.638786	0.322592	-0.0199835	-0.191446	-0.0348593	-1.75825	-1.1513
100.16	1.89911	-0.0363045	-0.0883701	-1.33016	-0.399575	-0.727965	1.71663	0.602122	0.266968	0.204725	-0.589068	0.465612	0.151344	0.48152	-0.426608	0.635067	0.334673	-0.0161495	-0.166499	-0.0216719	-1.74239	-1.15449
100.64	1.92857	-0.00353397	-0.0901547	-1.40413	-0.382251	-0.763313	1.71852	0.598395	0.242869	0.181548	-0.622167	0.399133	0.167721	0.476434	-0.446725	0.616941	0.352898	-0.0151031	-0.132472	-0.0119086	-1.71664	-1.16323
101.12	1.95484	0.0296892	-0.101013	-1.47333	-0.365168	-0.797417	1.72374	0.592914	0.213594	0.174556	-0.632027	0.345824	0.194425	0.45795	-0.455252	0.594487	0.37258	-0.0171735	-0.0921351	-0.00867293	-1.6866	-1.1779
101.6	1.97383	0.0681166	-0.114298	-1.54756	-0.351662	-0.831056	1.72638	0.588094	0.191232	0.179042	-0.608952	0.3122	0.222391	0.424956	-0.457006	0.575571	0.387043	-0.0238184	-0.0506453	-0.0165259	-1.65578	-1.19557
102.08	1.98046	0.10936	-0.120366	-1.62907	-0.342711	-0.85774	1.71654	0.585859	0.186304	0.188006	-0.561134	0.295891	0.243929	0.381605	-0.453291	0.563086	0.392186	-0.0356395	-0.0116783	-0.0364808	-1.62397	-1.21295
102.56	1.97178	0.14304	-0.113769	-1.70481	-0.341276	-0.864399	1.68788	0.587511	0.199654	0.199383	-0.506382	0.289707	0.256353	0.33779	-0.444192	0.554636	0.386954	-0.0513118	0.0232779	-0.0666932	-1.59068	-1.22494
103.04	1.94896	0.161953	-0.0978228	-1.75745	-0.343448	-0.848231	1.63804	0.593799	0.227188	0.213816	-0.463819	0.283848	0.261498	0.303129	-0.426608	0.55038	0.373509	-0.067657	0.0541354	-0.0977732	-1.55384	-1.22945
103.52	1.91517	0.16306	-0.0822883	-1.78793	-0.348707	-0.826351	1.57471	0.602426	0.258929	0.232911	-0.443381	0.275852	0.261694	0.277714	-0.402801	0.547089	0.354709	-0.0807631	0.0831592	-0.121033	-1.51771	-1.22842
104	1.8756	0.153413	-0.0765502	-1.80672	-0.353338	-0.829806	1.50764	0.609522	0.287663	0.258762	-0.442534	0.269037	0.258506	0.256024	-0.376646	0.545838	0.332098	-0.0886274	0.112111	-0.13113	-1.48712	-1.22261
104.48	1.82343	0.1452	-0.0870602	-1.83258	-0.357493	-0.883068	1.44405	0.609835	0.31252	0.286315	-0.449555	0.269408	0.251	0.226717	-0.356559	0.545514	0.307286	-0.0916016	0.141362	-0.129183	-1.46776	-1.21427
104.96	1.75152	0.151064	-0.111054	-1.87848	-0.358761	-0.981235	1.38879	0.601514	0.344431	0.31224	-0.447817	0.282668	0.239152	0.182836	-0.346438	0.54387	0.282296	-0.0920954	0.169292	-0.118273	-1.45859	-1.20429
105.44	1.65846	0.174335	-0.138805	-1.93353	-0.360473	-1.09073	1.33892	0.586529	0.390691	0.33188	-0.422999	0.30584	0.225172	0.1297	-0.346897	0.537108	0.262429	-0.0950535	0.194125	-0.102672	-1.45359	-1.19565
105.92	1.56103	0.208868	-0.162257	-1.97802	-0.367981	-1.16903	1.28712	0.570287	0.456416	0.345829	-0.371893	0.328359	0.211346	0.0795591	-0.356166	0.523781	0.250516	-0.103058	0.216234	-0.0815009	-1.44597	-1.18748
106.4	1.48234	0.239579	-0.171131	-1.99424	-0.385097	-1.19353	1.22847	0.558206	0.532117	0.353184	-0.298382	0.337698	0.199086	0.046233	-0.37017	0.504025	0.25137	-0.116982	0.238414	-0.0514226	-1.4347	-1.18224
106.88	1.44249	0.259222	-0.166086	-1.98379	-0.414708	-1.17464	1.1619	0.553632	0.597739	0.354647	-0.214022	0.32569	0.187762	0.0339802	-0.380712	0.483129	0.264148	-0.134016	0.263875	-0.0123899	-1.42207	-1.17879
107.36	1.45414	0.265292	-0.150439	-1.95644	-0.456207	-1.14817	1.09023	0.555176	0.633209	0.350809	-0.140098	0.287731	0.174095	0.0347795	-0.379227	0.470196	0.287131	-0.150191	0.29394	0.0322281	-1.41279	-1.17343
107.84	1.51011	0.267847	-0.126288	-1.92851	-0.504319	-1.14812	1.01824	0.558304	0.633356	0.343354	-0.0949253	0.231668	0.157617	0.0328815	-0.364021	0.471068	0.317229	-0.161517	0.327662	0.0719127	-1.40357	-1.16117
108.32	1.59174	0.280885	-0.0974007	-1.90833	-0.553476	-1.17252	0.949213	0.556939	0.603663	0.335842	-0.0899246	0.167246	0.138643	0.0146047	-0.335443	0.485333	0.351601	-0.1675	0.359471	0.0997411	-1.39228	-1.13956
108.8	1.67566	0.309841	-0.0669822	-1.89709	-0.600489	-1.19557	0.887979	0.548203	0.562574	0.331075	-0.119216	0.10834	0.119596	-0.0244212	-0.304187	0.507268	0.386309	-0.168185	0.383687	0.114212	-1.37301	-1.1074
109.28	1.73546	0.349613	-0.0355446	-1.88713	-0.645641	-1.18813	0.837552	0.530835	0.527342	0.332849	-0.158687	0.0653797	0.103294	-0.0769376	-0.278801	0.532498	0.416011	-0.164674	0.395878	0.118973	-1.34161	-1.07045
109.76	1.75958	0.385414	-0.00421803	-1.87587	-0.688941	-1.14731	0.799622	0.507138	0.508159	0.33975	-0.177818	0.0400616	0.0918722	-0.129136	-0.26972	0.555495	0.437173	-0.158971	0.397301	0.122721	-1.30625	-1.03658
110.24	1.74168	0.407537	0.0268067	-1.8688	-0.732003	-1.09859	0.773825	0.47994	0.503119	0.348143	-0.160977	0.0285272	0.0853601	-0.16873	-0.278116	0.574147	0.447677	-0.152022	0.393593	0.129205	-1.27378	-1.01441
110.72	1.68643	0.41443	0.0561568	-1.87061	-0.773572	-1.08071	0.758765	0.452365	0.505751	0.35632	-0.111501	0.0240424	0.0814876	-0.191103	-0.300071	0.588572	0.44982	-0.146469	0.391423	0.13749	-1.24905	-1.00511
111.2	1.61088	0.420663	0.0826881	-1.88547	-0.809343	-1.10799	0.75069	0.425662	0.506304	0.36482	-0.053984	0.0237744	0.0759723	-0.196105	-0.327035	0.597201	0.445947	-0.146209	0.394247	0.145428	-1.23385	-1.00455
111.68	1.53444	0.445161	0.104354	-1.91216	-0.839118	-1.16348	0.749512	0.400767	0.500877	0.375819	-0.0154313	0.0296207	0.0660238	-0.188427	-0.355971	0.596066	0.436321	-0.153401	0.401353	0.152814	-1.22535	-1.00323
112.16	1.47766	0.495249	0.11375	-1.93966	-0.862	-1.20512	0.754803	0.378753	0.48994	0.349133	-0.018882	0.0483451	0.0510517	-0.169426	-0.384247	0.583875	0.420863	-0.167076	0.40952	0.162726	-1.22329	-0.994605
112.64	1.45408	0.565949	0.103105	-1.96079	-0.879733	-1.19588	0.770065	0.361284	0.482064	0.365998	-0.0596841	0.07908	0.0342722	-0.138183	-0.409607	0.56142	0.39756	-0.179703	0.414422	0.179025	-1.2233	-0.976838
113.12	1.46909	0.638671	0.0735445	-1.96741	-0.895904	-1.12956	0.796503	0.348809	0.485933	0.384465	-0.127393	0.11412	0.0218073	-0.0944322	-0.429779	0.534861	0.370255	-0.182581	0.414875	0.204928	-1.2233	-0.956188
113.6	1.5196	0.695789	0.0286968	-1.95965	-0.912531	-1.03557	0.82973	0.339936	0.505942	0.400443	-0.200677	0.138981	0.0168679	-0.0425381	-0.439581	0.511655	0.345789	-0.170051	0.411726	0.238693	-1.21771	-0.938183
114.08	1.59522	0.732013	-0.0171267	-1.93782	-0.930151	-0.956319	0.866407	0.331808	0.540415	0.410931	-0.264768	0.143639	0.0179214	0.0118622	-0.437249	0.496011	0.331403	-0.143152	0.407997	0.27584	-1.20569	-0.926312
114.56	1.68124	0.749148	-0.0498581	-1.90717	-0.943652	-0.923993	0.901743	0.320654	0.583849	0.413409	-0.323029	0.130889	0.0183008	0.0628757	-0.423397	0.487375	0.327075	-0.110158	0.404914	0.311913	-1.18724	-0.918131
115.04	1.75199	0.75698	-0.0596559	-1.87174	-0.949012	-0.94798	0.935515	0.304031	0.630523	0.407187	-0.375822	0.108822	0.0110793	0.105964	-0.402141	0.480379	0.324486	-0.0792946	0.402503	0.345495	-1.16443	-0.907977
115.52	1.79021	0.758937	-0.0463068	-1.83126	-0.942404	-1.01149	0.972586	0.282538	0.676532	0.391035	-0.430773	0.0902685	-0.00730429	0.141453	-0.380987	0.471685	0.312301	-0.0558277	0.400154	0.375685	-1.14076	-0.892382
116	1.78481	0.755325	-0.0185859	-1.78357	-0.926547	-1.08654	0.955367	0.25944	0.722949	0.367384	-0.486848	0.0777974	-0.0320917	0.168568	-0.362202	0.45652	0.283963	-0.0380552	0.396802	0.401133	-1.11811	-0.873799
116.48	1.74675	0.743455	0.00886411	-1.7219	-0.908013	-1.15255	1.00108	0.238165	0.770569	0.343614	-0.543915	0.0639605	-0.0527281	0.185785	-0.340772	0.437959	0.242846	-0.0200984	0.393005	0.419452	-1.09744	-0.859003
116.96	1.7023	0.724485	0.0264698	-1.64428	-0.898017	-1.19513	1.0469	0.22145	0.823501	0.331437	-0.593428	0.0358434	-0.0581908	0.189629	-0.312328	0.416969	0.200193	0.000952126	0.389773	0.430135	-1.08233	-0.853892
117.44	1.68374	0.705882	0.0310775	-1.55267	-0.898327	-1.21207	1.0838	0.210242	0.877999	0.340392	-0.628258	-0.0103396	-0.044814	0.181292	-0.275661	0.392776	0.166525	0.0221202	0.387526	0.432745	-1.07521	-0.859625
117.92	1.70917	0.692565	0.0235498	-1.45421	-0.907007	-1.20309	1.10464	0.206119	0.934131	0.37519	-0.63926	-0.0710209	-0.0175696	0.166618	-0.237185	0.365948	0.144928	0.0394832	0.388015	0.428277	-1.08068	-0.86904
118.4	1.76817	0.685755	0.0101148	-1.35971	-0.915749	-1.17032	1.10403	0.210608	0.98456	0.431746	-0.624872	-0.134755	0.0110394	0.155353	-0.203213	0.337131	0.13054	0.0499648	0.391909	0.418655	-1.09943	-0.875709
118.88	1.83476	0.678568	-0.00595058	-1.27717	-0.91572	-1.11425	1.08581	0.224424	1.02849	0.497489	-0.591556	-0.193076	0.0304389	0.158033	-0.180517	0.308206	0.11598	0.0573429	0.400439	0.406398	-1.13247	-0.875315
119.36	1.88039	0.664082	-0.0233798	-1.20618	-0.90334	-1.04071	1.0544	0.247575	1.06222	0.561372	-0.54927	-0.243718	0.0367478	0.177774	-0.168881	0.283459	0.0957499	0.0696139	0.412655	0.393363	-1.16848	-0.869834
119.84	1.89258	0.635567	-0.0421008	-1.14036	-0.882294	-0.953094	1.01623	0.275631	1.08327	0.61737	-0.503786	-0.290725	0.0349783	0.212719	-0.163409	0.268174	0.0692759	0.0918326	0.425293	0.386463	-1.19968	-0.865016
120.32	1.87378	0.596153	-0.0573968	-1.07447	-0.859388	-0.866843	0.975876	0.304347	1.08632	0.664273	-0.455008	-0.333191	0.0348054	0.255876	-0.16122	0.264724	0.0421432	0.121649	0.434786	0.388885	-1.22281	-0.865095
120.8	1.83992	0.549955	-0.0632775	-1.00109	-0.841142	-0.791332	0.937992	0.329043	1.06449	0.704582	-0.398383	-0.364121	0.0462449	0.300887	-0.160902	0.272299	0.0174194	0.148697	0.437998	0.404843	-1.237	-0.870416
121.28	1.79989	0.500287	-0.0584172	-0.919238	-0.831334	-0.730055	0.908237	0.34932	1.01739	0.740452	-0.330349	-0.375152	0.072546	0.338708	-0.16503	0.289283	-0.00111827	0.164022	0.433525	0.429579	-1.24182	-0.876603
121.76	1.75268	0.45016	-0.0449858	-0.833459	-0.831132	-0.681246	0.891928	0.365277	0.946303	0.767656	-0.252776	-0.36434	0.110296	0.36028	-0.175138	0.310958	-0.0132189	0.165032	0.424276	0.458249	-1.24256	-0.876931
122.24	1.69685	0.403401	-0.0317639	-0.744358	-0.84005	-0.633432	0.887956	0.376634	0.861513	0.781518	-0.173787	-0.337547	0.152946	0.354706	-0.187559	0.333808	-0.0192271	0.157594	0.416487	0.481778	-1.23916	-0.869414
122.72	1.63552	0.362015	-0.0220395	-0.657236	-0.857507	-0.581275	0.89126	0.382147	0.773335	0.779428	-0.106712	-0.308473	0.193732	0.317141	-0.195455	0.35533	-0.0205615	0.149776	0.416546	0.495714	-1.23181	-0.857012
123.2	1.58107	0.332185	-0.0137098	-0.573395	-0.882835	-0.526609	0.892766	0.378563	0.69303	0.764005	-0.0604858	-0.284936	0.230709	0.254188	-0.191622	0.373324	-0.019	0.144867	0.427043	0.501944	-1.22418	-0.842679
123.68	1.54404	0.320261	-0.000714604	-0.497928	-0.908631	-0.483671	0.884233	0.363403	0.623689	0.741444	-0.0334599	-0.26715	0.265438	0.18711	-0.175571	0.386231	-0.0162125	0.139502	0.447732	0.50816	-1.21709	-0.831873
124.16	1.52603	0.321002	0.026679	-0.434642	-0.927688	-0.466586	0.866034	0.337626	0.56243	0.720854	-0.0177806	-0.246375	0.298351	0.136182	-0.156016	0.397819	-0.0111809	0.127066	0.471252	0.519755	-1.21195	-0.825516
124.64	1.51551	0.323447	0.0689018	-0.381754	-0.93248	-0.476395	0.844087	0.305692	0.504119	0.709325	-0.00557475	-0.219335	0.329171	0.109084	-0.144572	0.411257	9.96773e-05	0.104041	0.490983	0.537808	-1.20839	-0.82074
125.12	1.4968	0.313123	0.119103	-0.340971	-0.921276	-0.502539	0.82303	0.273062	0.446127	0.707824	0.0126335	-0.188348	0.35409	0.0927262	-0.150451	0.429223	0.021753	0.0737629	0.501601	0.559571	-1.20699	-0.817484
125.6	1.46097	0.280384	0.167769	-0.307939	-0.897546	-0.521099	0.802426	0.244675	0.390946	0.713282	0.0387994	-0.164853	0.369727	0.0639934	-0.172898	0.451327	0.0538482	0.0436177	0.502556	0.579048	-1.20972	-0.813838
126.08	1.42479	0.226552	0.208825	-0.276532	-0.872625	-0.510689	0.777542	0.222372	0.34072	0.717707	0.0752455	-0.157137	0.37581	0.00578389	-0.203751	0.47499	0.090091	0.0183269	0.49572	0.592113	-1.22011	-0.810845
126.56	1.41515	0.156668	0.242402	-0.246497	-0.854543	-0.465023	0.74366	0.206045	0.298454	0.715186	0.116573	-0.16249	0.374684	-0.0750795	-0.231448	0.495296	0.119774	3.04637e-05	0.487132	0.598578	-1.23877	-0.809125
127.04	1.44947	0.0897912	0.273553	-0.216011	-0.846135	-0.392671	0.702013	0.194386	0.261991	0.703278	0.158012	-0.166418	0.373285	-0.149707	-0.242799	0.50685	0.133264	-0.0159394	0.481565	0.601427	-1.26165	-0.807116
127.52	1.52677	0.0353394	0.30495	-0.182671	-0.845591	-0.312681	0.659848	0.185849	0.226224	0.684368	0.202739	-0.156238	0.376908	-0.189737	-0.239373	0.508939	0.130376	-0.0310044	0.480628	0.603109	-1.28354	-0.802342
128	1.61953	-0.00145905	0.331984	-0.147074	-0.844146	-0.233166	0.624757	0.179969	0.186965	0.667254	0.255706	-0.130252	0.388011	-0.183237	-0.224903	0.50238	0.118568	-0.042733	0.482513	0.606459	-1.29753	-0.792229
128.48	1.69209	-0.0222394	0.349253	-0.104365	-0.837104	-0.159049	0.59821	0.176208	0.140245	0.657219	0.320443	-0.101241	0.404248	-0.143465	-0.202817	0.489849	0.109313	-0.045611	0.483147	0.611748	-1.30087	-0.776478
128.96	1.73173	-0.0346123	0.352672	-0.0583505	-0.822807	-0.0811005	0.579614	0.172773	0.0918711	0.658454	0.403015	-0.0905079	0.422244	-0.0994272	-0.17809	0.473419	0.111464	-0.0332234	0.480915	0.618306	-1.29738	-0.756865
129.44	1.75	-0.046953	0.342114	-0.0135563	-0.805983	0.00298403	0.562957	0.168014	0.0512023	0.664396	0.50139	-0.108824	0.437272	-0.0721399	-0.148792	0.452345	0.128231	-0.00593462	0.475604	0.626207	-1.29028	-0.734884
129.92	1.77586	-0.0626065	0.328127	0.0259646	-0.788579	0.0874153	0.545897	0.159869	0.0261673	0.668613	0.605042	-0.153259	0.449365	-0.0650366	-0.115393	0.428512	0.155429	0.0299598	0.471639	0.635506	-1.28233	-0.712335
130.4	1.83525	-0.0792607	0.318816	0.065945	-0.769503	0.164086	0.526071	0.148775	0.0184929	0.662485	0.704809	-0.207297	0.462024	-0.0627498	-0.0795023	0.402589	0.186272	0.0643355	0.471355	0.645365	-1.27131	-0.688654
130.88	1.93287	-0.0931186	0.319968	0.122845	-0.745903	0.224369	0.509195	0.13598	0.0219101	0.644955	0.793682	-0.254356	0.480259	-0.0515093	-0.0468808	0.378291	0.214317	0.0880172	0.474111	0.655529	-1.2529	-0.666882
131.36	2.0523	-0.102361	0.327137	0.220117	-0.713116	0.27142	0.501566	0.124155	0.0206945	0.617852	0.873779	-0.285768	0.506137	-0.0253528	-0.0225542	0.354595	0.234579	0.0967757	0.476012	0.664766	-1.22539	-0.648993
131.84	2.16723	-0.107253	0.332061	0.366142	-0.670291	0.313597	0.504597	0.115375	0.00531103	0.586001	0.942328	-0.299684	0.536796	0.00232565	-0.00681909	0.329257	0.246365	0.0937125	0.472011	0.671869	-1.19219	-0.63887
132.32	2.2513	-0.112984	0.325841	0.554853	-0.620817	0.369218	0.516767	0.110483	-0.0221514	0.551639	0.993586	-0.300065	0.56431	0.0165623	0.00321195	0.306496	0.251846	0.0828305	0.462027	0.71917	-1.159	-0.6372
132.8	2.2926	-0.1206	0.30189	0.753481	-0.569399	0.437033	0.5324	0.108631	-0.046144	0.515797	1.01982	-0.285846	0.582174	0.00659295	0.0168454	0.285014	0.254904	0.0683936	0.449878	0.718448	-1.13373	-0.638807
133.28	2.29618	-0.128179	0.262803	0.926435	-0.523715	0.509382	0.546841	0.108728	-0.0504847	0.476534	1.01354	-0.260825	0.585486	-0.0235355	0.0411575	0.26852	0.261603	0.0504487	0.442937	0.714554	-1.11609	-0.635521
133.76	2.27869	-0.130853	0.218667	1.04617	-0.488002	0.566109	0.55507	0.110623	-0.0244923	0.436533	0.973147	-0.22584	0.578692	-0.0606914	0.0746942	0.258732	0.274664	0.0269565	0.445139	0.708297	-1.10299	-0.622802
134.24	2.25686	-0.127507	0.182859	1.11305	-0.463037	0.590948	0.55677	0.115541	0.0272012	0.401408	0.906759	-0.189466	0.567646	-0.092742	0.109959	0.256558	0.292222	-0.00162339	0.453104	0.701289	-1.09139	-0.60055
134.72	2.24814	-0.121887	0.164972	1.1464	-0.447749	0.580888	0.552316	0.125979	0.0895557	0.376201	0.833211	-0.162926	0.558594	-0.116541	0.136643	0.256016	0.309725	-0.0312313	0.45976	0.692777	-1.07595	-0.578474
135.2	2.25836	-0.12135	0.166184	1.17303	-0.436179	0.539706	0.546007	0.143064	0.15233	0.363088	0.766008	-0.151906	0.554308	-0.138273	0.146363	0.253547	0.321479	-0.0550876	0.460125	0.681623	-1.05731	-0.564602
135.68	2.2824	-0.132102	0.179617	1.20665	-0.42222	0.481334	0.542174	0.163523	0.20695	0.360546	0.717767	-0.152539	0.555936	-0.166668	0.140524	0.248391	0.32423	-0.0654944	0.45508	0.667476	-1.03642	-0.562786
136.16	2.30296	-0.148155	0.190037	1.24295	-0.402055	0.416438	0.545935	0.182996	0.258693	0.360779	0.698026	-0.153058	0.561493	-0.208298	0.125106	0.24341	0.316817	-0.0711533	0.450239	0.658617	-1.0167	-0.572159
136.64	2.30512	-0.157226	0.186502	1.26764	-0.376433	0.365357	0.562316	0.19555	0.313844	0.356305	0.707418	-0.137626	0.570449	-0.260304	0.107745	0.245376	0.301941	-0.0706448	0.450839	0.63919	-0.995981	-0.584619
137.12	2.28191	-0.143452	0.169257	1.27101	-0.349413	0.351152	0.586869	0.199951	0.378712	0.343667	0.735101	-0.0972619	0.583582	-0.312209	0.0911204	0.256021	0.281782	-0.0692655	0.453552	0.623198	-0.973151	-0.591537
137.6	2.24356	-0.102943	0.147121	1.26017	-0.325664	0.389008	0.613972	0.198704	0.451839	0.323951	0.763893	-0.0337691	0.598884	-0.355756	0.0705048	0.274214	0.258231	-0.0701285	0.451171	0.613786	-0.949439	-0.589178
138.08	2.20968	-0.043536	0.131586	1.24991	-0.305439	0.485245	0.635353	0.196425	0.528925	0.301194	0.769166	0.0430035	0.614262	-0.385329	0.0463484	0.293992	0.233747	-0.0730547	0.434964	0.610074	-0.924603	-0.575946
138.56	2.20158	0.0156804	0.130523	1.25843	-0.287632	0.625239	0.647008	0.196468	0.604791	0.28435	0.741184	0.117619	0.62687	-0.401344	0.0180075	0.312247	0.212408	-0.0740601	0.405095	0.611763	-0.898498	-0.554691
139.04	2.22839	0.0590212	0.14005	1.29476	-0.266276	0.771046	0.652516	0.198855	0.674408	0.280037	0.69094	0.178459	0.634901	-0.403866	-0.00749366	0.328272	0.197967	-0.0673368	0.370754	0.616611	-0.879016	-0.52916
139.52	2.27282	0.0813213	0.150564	1.35822	-0.23888	0.888187	0.657279	0.20061	0.735008	0.287132	0.64452	0.21959	0.639702	-0.39283	-0.0232368	0.342795	0.19391	-0.0510494	0.343694	0.623344	-0.868477	-0.504427
140	2.31235	0.0912875	0.1513	1.44045	-0.206173	0.958102	0.665863	0.197685	0.782488	0.299588	0.631276	0.244678	0.645964	-0.365204	-0.0278714	0.354685	0.197539	-0.0277421	0.332368	0.632606	-0.869419	-0.485842
140.48	2.3221	0.104665	0.141419	1.53569	-0.170823	0.987701	0.67584	0.187816	0.817438	0.307434	0.658146	0.262128	0.660315	-0.32075	-0.0292656	0.358903	0.204647	-0.00101159	0.336113	0.643128	-0.881162	-0.475222
140.96	2.29026	0.130476	0.125164	1.64151	-0.136305	1.00347	0.678981	0.170588	0.846737	0.303629	0.704372	0.284951	0.686469	-0.263666	-0.0367905	0.349247	0.211482	0.022237	0.348056	0.65515	-0.896471	-0.473894
141.44	2.22645	0.169254	0.109901	1.74744	-0.103648	1.02381	0.668927	0.146951	0.878748	0.286382	0.73453	0.319742	0.722485	-0.205017	-0.0536273	0.324947	0.224977	0.0382485	0.360187	0.667118	-0.910102	-0.478539
141.92	2.15314	0.216843	0.10506	1.84393	-0.0743679	1.04875	0.644705	0.118691	0.924896	0.264906	0.72977	0.361921	0.759938	-0.155755	-0.0685957	0.29789	0.228751	0.0436512	0.370724	0.677712	-0.919499	-0.482883
142.4	2.09499	0.269353	0.111291	1.91786	-0.0460128	1.06349	0.612799	0.091004	0.993811	0.250542	0.696961	0.397343	0.787597	-0.122854	-0.0692475	0.28042	0.237027	0.0382775	0.379157	0.689113	-0.923038	-0.481956
142.88	2.06761	0.328064	0.124328	1.96559	-0.0185227	1.05757	0.583497	0.0693454	1.0871	0.254498	0.667124	0.410706	0.796365	-0.104549	-0.0486766	0.283642	0.253897	0.026806	0.38679	0.700233	-0.924036	-0.471734
143.36	2.06865	0.391722	0.1371	1.99239	0.00862962	1.03364	0.564859	0.0601993	1.2028	0.276062	0.662429	0.399152	0.786382	-0.0926413	-0.0105316	0.302674	0.277785	0.0165237	0.391157	0.709083	-0.925144	-0.451907
143.84	2.08187	0.459655	0.145464	2.0157	0.0367038	1.01578	0.556907	0.0662622	1.33067	0.307002	0.683218	0.372148	0.764231	-0.0790519	0.0287899	0.320903	0.306349	0.0150868	0.390792	0.712448	-0.928256	-0.424075
144.32	2.08946	0.523302	0.151259	2.04682	0.0679291	1.02936	0.557948	0.0848251	1.45593	0.337191	0.71119	0.347756	0.740205	-0.0572267	0.0576827	0.319873	0.335831	0.0271688	0.386034	0.706865	-0.930439	-0.393716
144.8	2.08265	0.57374	0.155827	2.08783	0.10292	1.08304	0.562953	0.106408	1.56404	0.361199	0.720935	0.341165	0.721842	-0.0259147	0.0743352	0.290671	0.36224	0.0511595	0.379861	0.690661	-0.927993	-0.365065
145.28	2.07105	0.608541	0.162638	2.1312	0.14013	1.16751	0.56881	0.121623	1.64261	0.379733	0.706321	0.356269	0.711626	0.0133938	0.0856086	0.242439	0.382794	0.0809749	0.378129	0.66725	-0.921352	-0.341608
145.76	2.0707	0.63086	0.17236	2.16235	0.175511	1.24843	0.574899	0.125916	1.68606	0.398476	0.680673	0.386239	0.707364	0.0594051	0.101461	0.198298	0.395088	0.10771	0.384331	0.642686	-0.910658	-0.326161
146.24	2.10398	0.649689	0.183041	2.1757	0.204688	1.3057	0.579953	0.12271	1.6965	0.420902	0.661797	0.420087	0.707645	0.112095	0.123644	0.176377	0.397599	0.124899	0.396064	0.586976	-0.898775	-0.315043
146.72	2.16949	0.670721	0.188499	2.17009	0.226386	1.33394	0.58457	0.119223	1.68561	0.444731	0.660878	0.451374	0.714579	0.168652	0.144347	0.18361	0.391198	0.129798	0.408672	0.57206	-0.888247	-0.302873
147.2	2.25104	0.692394	0.184236	2.14897	0.239879	1.34307	0.589277	0.120335	1.66503	0.463674	0.677445	0.480322	0.731712	0.22571	0.155016	0.211091	0.379581	0.124546	0.419085	0.565233	-0.880758	-0.286022
147.68	2.3233	0.705564	0.163963	2.11655	0.246654	1.34774	0.595063	0.12408	1.64286	0.471608	0.70306	0.507128	0.759215	0.273589	0.154447	0.241296	0.367806	0.114904	0.426692	0.565611	-0.876213	-0.262257
148.16	2.36733	0.70604	0.127501	2.0724	0.249966	1.36083	0.603858	0.122052	1.62334	0.467633	0.736489	0.527521	0.791681	0.303252	0.149672	0.256825	0.360037	0.107848	0.433815	0.571108	-0.875882	-0.233639
148.64	2.38197	0.6948	0.0770477	2.00955	0.288989	1.39143	0.614114	0.107567	1.60569	0.455482	0.781994	0.536958	0.818584	0.309899	0.146221	0.256771	0.359195	0.105859	0.44043	0.580151	-0.876767	-0.205626
149.12	2.37866	0.67741	0.0134382	1.92962	0.285417	1.44517	0.62491	0.0816546	1.58701	0.441388	0.84503	0.53471	0.830875	0.295206	0.14503	0.248634	0.365972	0.109003	0.443755	0.590257	-0.870893	-0.179254
149.6	2.37477	0.657638	-0.0571206	1.83646	0.279666	1.52265	0.633541	0.0550878	1.56227	0.429425	0.922842	0.524409	0.827245	0.268315	0.139345	0.243394	0.380439	0.110974	0.440125	0.601096	-0.85432	-0.15891
150.08	2.37509	0.636956	-0.130748	1.73994	0.273871	1.62589	0.63915	0.0394688	1.53282	0.419677	1.00502	0.512474	0.813902	0.238904	0.125172	0.247395	0.402194	0.107267	0.429693	0.611033	-0.82268	-0.145632
150.56	2.37792	0.614273	-0.201836	1.65863	0.268265	1.73746	0.646545	0.040576	1.49676	0.411915	1.07835	0.501435	0.800648	0.212455	0.104338	0.259121	0.430379	0.0961326	0.414997	0.618947	-0.773374	-0.14257
151.04	2.38039	0.589655	-0.263255	1.60426	0.263339	1.83386	0.656228	0.0537374	1.45707	0.404322	1.13005	0.485273	0.794286	0.19109	0.0855726	0.271714	0.460332	0.0809178	0.403667	0.623076	-0.712726	-0.150592
151.52	2.38176	0.566172	-0.308164	1.58781	0.257583	1.90048	0.667276	0.0682549	1.42097	0.395929	1.16223	0.452836	0.797075	0.170125	0.0795512	0.27625	0.485738	0.068552	0.401035	0.622124	-0.651485	-0.167664
152	2.3904	0.548887	-0.333279	1.60391	0.251732	1.94297	0.674515	0.0744037	1.39619	0.388586	1.18653	0.39997	0.807683	0.147144	0.0848568	0.273438	0.50256	0.0636097	0.40779	0.613931	-0.598555	-0.18918
152.48	2.4141	0.538926	-0.336312	1.63907	0.245902	1.98549	0.67173	0.0715265	1.38765	0.381015	1.21101	0.335679	0.824105	0.116987	0.0933163	0.271989	0.510798	0.0658167	0.419113	0.599493	-0.560809	-0.20969
152.96	2.45494	0.530501	-0.324379	1.67186	0.241688	2.05481	0.655707	0.0658073	1.38883	0.373548	1.24463	0.280476	0.845537	0.0804519	0.0941644	0.281377	0.515636	0.0704595	0.427826	0.580841	-0.539362	-0.223723
153.44	2.50157	0.517409	-0.301857	1.68334	0.242382	2.15913	0.632341	0.0660865	1.38752	0.368884	1.29261	0.255904	0.869356	0.0387492	0.0815022	0.310998	0.522433	0.0740592	0.428018	0.562532	-0.530006	-0.230718
153.92	2.53293	0.495681	-0.278493	1.6675	0.246954	2.28272	0.610719	0.0753827	1.37079	0.371021	1.34743	0.269255	0.891087	-0.00290356	0.0591512	0.360167	0.532057	0.0793221	0.420151	0.548394	-0.527752	-0.232522
154.4	2.53358	0.468864	-0.257199	1.63226	0.254586	2.39972	0.595405	0.0901635	1.33699	0.384009	1.39707	0.311598	0.906388	-0.0396608	0.0356711	0.420976	0.538277	0.0958104	0.406103	0.541064	-0.526331	-0.229759
154.88	2.49944	0.447709	-0.236172	1.59464	0.261393	2.48095	0.587851	0.103616	1.29317	0.409666	1.43363	0.364099	0.911281	-0.0678109	0.019091	0.485758	0.532362	0.133046	0.388938	0.539056	-0.521021	-0.223704
155.36	2.43739	0.442275	-0.214762	1.56751	0.266052	2.52197	0.578987	0.111951	1.24946	0.446919	1.45327	0.411284	0.909657	-0.0875642	0.0101066	0.544732	0.512286	0.190196	0.372522	0.538702	-0.512286	-0.214078
155.84	2.36303	0.451587	-0.189481	1.54867	0.266423	2.54042	0.562037	0.115289	1.20859	0.489901	1.45966	0.448318	0.90676	-0.103305	0.00807108	0.593826	0.485082	0.254894	0.358317	0.537636	-0.504085	-0.200226
156.32	2.28936	0.470687	-0.164843	1.53162	0.267309	2.54801	0.531878	0.117135	1.16444	0.530485	1.46231	0.481314	0.909178	-0.122936	0.0092899	0.63351	0.462415	0.308353	0.34911	0.534138	-0.502618	-0.185016
156.8	2.22767	0.487555	-0.147633	1.50172	0.269652	2.54479	0.492305	0.118875	1.10593	0.561362	1.46863	0.519184	0.919274	-0.150683	0.0126581	0.662922	0.454455	0.337002	0.347051	0.531184	-0.513108	-0.170832
157.28	2.18132	0.4961	-0.142444	1.45398	0.274984	2.51921	0.452019	0.119257	1.02631	0.580153	1.47792	0.564763	0.932623	-0.187454	0.0207093	0.684416	0.459436	0.341082	0.352894	0.531057	-0.537596	-0.15709
157.76	2.15009	0.49614	-0.15084	1.39335	0.280922	2.45768	0.42218	0.115415	0.934331	0.58697	1.47964	0.610863	0.944486	-0.225627	0.0319872	0.701739	0.466466	0.330097	0.36668	0.535357	-0.572127	-0.141053
158.24	2.13611	0.493696	-0.168252	1.33178	0.287278	2.36374	0.411024	0.108265	0.844959	0.582045	1.46132	0.648267	0.95113	-0.255319	0.04662	0.71904	0.460377	0.319236	0.384182	0.541186	-0.60655	-0.120223
158.72	2.13997	0.492323	-0.184568	1.28131	0.289676	2.25841	0.419846	0.102111	0.77281	0.565499	1.42196	0.669984	0.952971	-0.272116	0.0613882	0.741509	0.433625	0.31553	0.399981	0.544188	-0.633808	-0.094901
159.2	2.15961	0.493552	-0.189457	1.24485	0.287447	2.17024	0.446651	0.10378	0.721972	0.537248	1.36947	0.675692	0.952645	-0.277725	0.0752184	0.76873	0.389296	0.315056	0.409022	0.542723	-0.646782	-0.0692092
159.68	2.18948	0.494812	-0.174407	1.22001	0.282136	2.11047	0.481174	0.116215	0.690087	0.501974	1.31769	0.671802	0.952703	-0.275028	0.0893679	0.796965	0.337694	0.31142	0.411129	0.538119	-0.648994	-0.0504511
160.16	2.21859	0.487628	-0.138257	1.19738	0.276656	2.07279	0.513383	0.136049	0.672193	0.465936	1.28035	0.667585	0.951869	-0.269561	0.104968	0.816439	0.290804	0.300135	0.408172	0.533702	-0.645401	-0.0425016
160.64	2.23623	0.466012	-0.0867193	1.16756	0.275292	2.03422	0.534551	0.155129	0.671582	0.440374	1.26845	0.670635	0.948934	-0.263613	0.125654	0.82361	0.253524	0.284118	0.405191	0.535598	-0.644666	-0.0436932
161.12	2.23364	0.429756	-0.0279571	1.12861	0.2852	1.97179	0.542868	0.165145	0.694793	0.432443	1.28009	0.683028	0.94244	-0.259729	0.151808	0.820934	0.222892	0.269232	0.404393	0.548218	-0.647078	-0.0500993
161.6	2.21105	0.385034	0.0277454	1.07927	0.308371	1.88728	0.538229	0.164206	0.741954	0.440935	1.30329	0.698904	0.935117	-0.26062	0.181294	0.81613	0.193426	0.261057	0.406122	0.567712	-0.657344	-0.0533548
162.08	2.17104	0.346295	0.0722985	1.0217	0.345827	1.80632	0.523159	0.156592	0.803668	0.456352	1.32407	0.704825	0.929798	-0.270845	0.207639	0.820571	0.163805	0.259136	0.408694	0.590111	-0.671066	-0.0516797
162.56	2.12318	0.32499	0.100861	0.964467	0.393009	1.75214	0.5047	0.150065	0.857733	0.467681	1.32926	0.691644	0.929003	-0.292061	0.227592	0.836901	0.136983	0.259993	0.40899	0.608143	-0.684883	-0.0457176
163.04	2.07975	0.326131	0.119509	0.909523	0.444389	1.74158	0.488745	0.149707	0.886076	0.467107	1.31621	0.657446	0.930872	-0.321187	0.233234	0.858276	0.121663	0.26183	0.406869	0.617599	-0.69824	-0.0369408
163.52	2.05156	0.342573	0.13251	0.865236	0.492569	1.76416	0.479971	0.154771	0.878679	0.460038	1.29117	0.609925	0.93179	-0.35388	0.222718	0.875023	0.12386	0.266331	0.405534	0.617136	-0.709956	-0.026286
164	2.03879	0.363671	0.144647	0.831284	0.532774	1.79952	0.48076	0.162445	0.836984	0.458443	1.27097	0.564942	0.928014	-0.38324	0.197181	0.880947	0.143882	0.275863	0.4103	0.608945	-0.721405	-0.0137959
164.48	2.03694	0.375728	0.155741	0.803292	0.566467	1.83159	0.491615	0.168053	0.780231	0.472516	1.27665	0.537042	0.918744	-0.407754	0.163543	0.880952	0.174716	0.291385	0.426821	0.595978	-0.733576	0.000660865
164.96	2.03318	0.374512	0.163798	0.777841	0.595998	1.85602	0.510114	0.170776	0.724261	0.501679	1.32089	0.531908	0.909899	-0.428029	0.128404	0.884149	0.205759	0.309827	0.456675	0.582729	-0.747757	0.0184813
165.44	2.0183	0.362121	0.170268	0.751079	0.62187	1.88179	0.534157	0.17168	0.687963	0.529138	1.39556	0.545198	0.909709	-0.445335	0.0996599	0.899307	0.229593	0.323892	0.496123	0.574657	-0.764009	0.038285
165.92	1.99327	0.347812	0.182175	0.721311	0.645001	1.91833	0.565326	0.172819	0.685897	0.530304	1.47672	0.566555	0.923765	-0.456525	0.0788139	0.929633	0.244924	0.329559	0.538547	0.572914	-0.784607	0.0593786
166.4	1.97284	0.343363	0.206291	0.692254	0.663068	1.96392	0.605791	0.175082	0.719733	0.487765	1.53599	0.587274	0.950679	-0.454505	0.0628953	0.972337	0.256854	0.326373	0.574884	0.578097	-0.809675	0.0814575
166.88	1.97211	0.35137	0.240751	0.666807	0.677607	2.00443	0.657688	0.178123	0.780525	0.404567	1.5532	0.601606	0.981483	-0.433612	0.0473184	1.0153	0.274559	0.318662	0.598418	0.587866	-0.837622	0.105114
167.36	1.99406	0.370438	0.277436	0.647379	0.690381	2.02	0.719583	0.182683	0.849595	0.29941	1.52804	0.61014	1.0063	-0.391458	0.0246371	1.05366	0.303631	0.312035	0.606983	0.599502	-0.862082	0.131004
167.84	2.02345	0.396009	0.299367	0.630792	0.706513	1.9987	0.784936	0.190115	0.909254	0.20032	1.47889	0.61311	1.01679	-0.334827	-0.008613	1.08484	0.344674	0.308937	0.60451	0.610659	-0.877452	0.154909
168.32	2.03971	0.417768	0.298633	0.614891	0.727945	1.94585	0.841799	0.201413	0.947728	0.126097	1.42794	0.611611	1.01377	-0.273409	-0.0485627	1.10622	0.39286	0.309582	0.597808	0.619483	-0.877125	0.173647
168.8	2.02914	0.42972	0.277837	0.593361	0.751986	1.88333	0.878809	0.215645	0.965556	0.0802543	1.38917	0.607262	1.00481	-0.219066	-0.0861565	1.11648	0.440461	0.311866	0.591267	0.626376	-0.863084	0.184508
169.28	1.99843	0.42888	0.252136	0.564499	0.771733	1.84332	0.894828	0.228353	0.972728	0.0535407	1.35532	0.602612	0.999203	-0.181222	-0.110417	1.11265	0.481824	0.315728	0.587066	0.632967	-0.84017	0.187179
169.76	1.97063	0.417332	0.23917	0.526409	0.778803	1.85358	0.893912	0.235659	0.983861	0.0316394	1.31495	0.60241	1.00206	-0.163763	-0.116577	1.09745	0.514596	0.32217	0.583388	0.639273	-0.8183	0.186322
170.24	1.96344	0.402569	0.246619	0.48063	0.768675	1.92283	0.88858	0.234313	1.0077	0.00275988	1.26283	0.609486	1.01113	-0.166228	-0.109313	1.07226	0.539618	0.330746	0.578693	0.64559	-0.807593	0.185197
170.72	1.9691	0.394542	0.26927	0.431142	0.743274	2.03824	0.883959	0.225983	1.04226	-0.0359012	1.20901	0.62272	1.01908	-0.182908	-0.0968932	1.04565	0.561707	0.338346	0.570804	0.653281	-0.808525	0.190382
171.2	1.96344	0.39978	0.294353	0.385089	0.708476	2.16056	0.883961	0.213839	1.07492	-0.0842349	1.16616	0.635079	1.02411	-0.204577	-0.0891264	1.02408	0.583411	0.340151	0.560194	0.662651	-0.818108	0.202077
171.68	1.91944	0.417798	0.313303	0.345395	0.677495	2.24533	0.884767	0.201523	1.09581	-0.136823	1.14267	0.64054	1.02966	-0.221813	-0.086572	1.01018	0.601412	0.332605	0.547261	0.674677	-0.825845	0.217212
172.16	1.83074	0.442244	0.326596	0.316264	0.659526	2.25884	0.882884	0.191642	1.10294	-0.189446	1.12816	0.636112	1.04301	-0.229973	-0.0872025	1.00228	0.60987	0.315786	0.530542	0.688985	-0.82614	0.229984
172.64	1.71588	0.463878	0.34213	0.299102	0.658642	2.19951	0.881534	0.185234	1.10017	-0.23658	1.1043	0.622649	1.06936	-0.22977	-0.0862793	0.99892	0.601422	0.296257	0.5081	0.707762	-0.81358	0.235356
173.12	1.60734	0.4709	0.365543	0.294179	0.670726	2.10561	0.885092	0.182906	1.09908	-0.272215	1.05676	0.607067	1.10372	-0.227636	-0.0809401	0.99897	0.575512	0.281915	0.479928	0.728913	-0.7925	0.231044
173.6	1.53166	0.463189	0.393345	0.303652	0.690708	2.03146	0.895139	0.186516	1.102	-0.292232	0.997507	0.596089	1.13283	-0.232937	-0.0745536	1.00485	0.540272	0.278308	0.449019	0.750354	-0.76912	0.218488
174.08	1.49262	0.441486	0.416409	0.323248	0.714004	2.01576	0.910245	0.196457	1.10788	-0.296058	0.951956	0.5925	1.14362	-0.251951	-0.0739896	1.01369	0.510653	0.287232	0.421546	0.76813	-0.751078	0.202027
174.56	1.47211	0.413679	0.428532	0.344714	0.738734	2.06655	0.924392	0.211067	1.1132	-0.286352	0.946163	0.595501	1.12978	-0.286759	-0.0813186	1.02452	0.500333	0.30618	0.404953	0.777122	-0.740632	0.184401
175.04	1.44351	0.386515	0.430971	0.364035	0.766655	2.1446	0.928589	0.226053	1.11316	-0.267769	0.978654	0.599402	1.09681	-0.334455	-0.0950689	1.0327	0.51226	0.328515	0.403232	0.774453	-0.737319	0.16916
175.52	1.3908	0.366226	0.429323	0.375639	0.797586	2.21263	0.92047	0.237038	1.10855	-0.248889	1.02333	0.59789	1.0574	-0.390082	-0.109629	1.03628	0.537067	0.34721	0.415509	0.761368	-0.735259	0.155945
176	1.31716	0.355468	0.43336	0.379764	0.830325	2.25096	0.901623	0.243723	1.10353	-0.228642	1.04359	0.585945	1.0245	-0.448381	-0.122083	1.03375	0.55702	0.356604	0.438593	0.742831	-0.731088	0.142436
176.48	1.24761	0.354578	0.443571	0.379025	0.859547	2.27713	0.876428	0.249715	1.09848	-0.205379	1.02211	0.564141	1.00236	-0.503284	-0.130192	1.02227	0.558347	0.3564	0.463678	0.726814	-0.72471	0.12884
176.96	1.21175	0.360668	0.45463	0.37766	0.879673	2.32521	0.84813	0.260209	1.08999	-0.175157	0.966915	0.536131	0.987488	-0.549327	-0.136226	1.00018	0.539454	0.34995	0.485025	0.719027	-0.718816	0.11501
177.44	1.22989	0.36954	0.459365	0.378471	0.889109	2.41324	0.813967	0.278445	1.07028	-0.135983	0.908692	0.506186	0.97322	-0.582357	-0.145348	0.967974	0.510222	0.343653	0.496718	0.720322	-0.717649	0.101269
177.92	1.29239	0.384245	0.454484	0.382873	0.888809	2.52209	0.771969	0.3025	1.03919	-0.0932135	0.876965	0.479832	0.955564	-0.600543	-0.159798	0.927566	0.483551	0.343585	0.498157	0.726419	-0.722988	0.0871294
178.4	1.36667	0.406054	0.446005	0.391201	0.886211	2.61053	0.722546	0.32575	1.00125	-0.054943	0.881986	0.460118	0.935788	-0.605367	-0.184362	0.885812	0.465133	0.353957	0.49259	0.732664	-0.731048	0.0720167
178.88	1.41274	0.443073	0.445372	0.399594	0.887614	2.64241	0.673512	0.340824	0.96529	-0.0306662	0.916903	0.444919	0.918345	-0.602903	-0.216693	0.850451	0.448133	0.372251	0.484719	0.734902	-0.736143	0.0564794
179.36	1.40315	0.49389	0.461402	0.406624	0.898753	2.6161	0.632719	0.343835	0.943587	-0.0229819	0.964316	0.433999	0.905384	-0.597627	-0.250638	0.830099	0.422255	0.391915	0.478442	0.733661	-0.737066	0.0422771
179.84	1.3455	0.556261	0.499166	0.407876	0.920434	2.55847	0.604021	0.336834	0.940494	-0.0293368	1.01441	0.426233	0.897918	-0.594354	-0.27658	0.823791	0.380476	0.405746	0.474942	0.730653	-0.73365	0.0304281
180.32	1.27107	0.623057	0.552963	0.401621	0.946369	2.51062	0.58382	0.324197	0.94947	-0.0362245	1.06144	0.422311	0.892173	-0.593833	-0.286203	0.824311	0.327473	0.409004	0.471473	0.7285	-0.726884	0.0208618
180.8	1.21409	0.683437	0.616136	0.386527	0.965572	2.48531	0.56605	0.311422	0.965245	-0.0335827	1.10844	0.421248	0.887181	-0.592111	-0.278554	0.823903	0.278109	0.399644	0.463621	0.72798	-0.718197	0.0118937
181.28	1.18931	0.73131	0.679768	0.362244	0.972632	2.46824	0.543075	0.303233	0.977479	-0.0185844	1.15385	0.421877	0.885269	-0.582688	-0.257942	0.815274	0.247713	0.380359	0.447882	0.73092	-0.708045	0.000657549
181.76	1.18558	0.766846	0.741514	0.344315	0.9665	2.42637	0.514834	0.300566	0.983606	0.00568521	1.1901	0.4211	0.888789	-0.560414	-0.238041	0.799975	0.242957	0.355637	0.424733	0.737094	-0.693104	-0.0143946
182.24	1.17479	0.798579	0.800282	0.342461	0.954171	2.34757	0.487456	0.303159	0.982944	0.0319346	1.21193	0.415444	0.896339	-0.522283	-0.233734	0.778477	0.257015	0.327058	0.399169	0.747462	-0.673179	-0.0315873
182.72	1.14232	0.833406	0.85526	0.3647	0.943744	2.23465	0.467582	0.308606	0.980536	0.0557534	1.21907	0.406155	0.903082	-0.471224	-0.245544	0.753399	0.27689	0.296602	0.376679	0.760395	-0.652273	-0.0482768
183.2	1.10234	0.872453	0.90587	0.407062	0.942213	2.11816	0.457943	0.313347	0.977264	0.0752735	1.21352	0.400924	0.902682	-0.413845	-0.271153	0.729914	0.290221	0.264595	0.361691	0.773188	-0.63201	-0.0628441
183.68	1.08528	0.91162	0.951022	0.452851	0.953097	2.01728	0.45299	0.311893	0.974097	0.0931949	1.19496	0.405904	0.893863	-0.36017	-0.300035	0.713934	0.294223	0.233461	0.354118	0.778224	-0.613523	-0.0764428
184.16	1.11393	0.940411	0.990116	0.486483	0.970161	1.93563	0.445944	0.300662	0.973189	0.107472	1.16807	0.430805	0.879717	-0.31752	-0.324605	0.706151	0.295473	0.206503	0.350988	0.776462	-0.598476	-0.0897011
184.64	1.18558	0.953347	1.02357	0.499843	0.987596	1.87088	0.434142	0.278377	0.97689	0.113489	1.13512	0.478584	0.867812	-0.291196	-0.34396	0.710979	0.303582	0.189394	0.349227	0.765724	-0.57857	-0.0994381
185.12	1.26875	0.94914	1.05267	0.493715	1.00047	1.82188	0.419387	0.247585	0.988155	0.103935	1.10186	0.544509	0.865125	-0.284405	-0.36163	0.723484	0.32547	0.186304	0.346235	0.748495	-0.551766	-0.10137
185.6	1.33209	0.93512	1.07733	0.484725	1.00622	1.79651	0.41055	0.213081	1.00751	0.0752975	1.07681	0.619542	0.872075	-0.296138	-0.386479	0.732964	0.358262	0.200909	0.340787	0.728999	-0.516987	-0.0926233
186.08	1.35902	0.918097	1.09448	0.486452	1.00544	1.79829	0.414616	0.182109	1.02647	0.0325502	1.06602	0.687873	0.884337	-0.322656	-0.421778	0.733666	0.390671	0.231006	0.334538	0.711112	-0.475068	-0.0737061
186.56	1.35755	0.903025	1.09789	0.501879	0.998876	1.8281	0.429996	0.159594	1.03281	-0.0119134	1.06628	0.737599	0.894803	-0.358083	-0.4673	0.719579	0.410897	0.269255	0.330513	0.697501	-0.430328	-0.0536695
187.04	1.34668	0.888601	1.08335	0.523578	0.987098	1.8748	0.4506	0.147477	1.0145	-0.0469352	1.0733	0.761952	0.900827	-0.392976	-0.517703	0.697578	0.414043	0.304727	0.329365	0.689095	-0.387341	-0.0445389
187.52	1.33847	0.869804	1.05155	0.538589	0.972743	1.92138	0.468397	0.145915	0.970862	-0.0689741	1.08759	0.764482	0.90106	-0.417755	-0.567535	0.675805	0.404618	0.327989	0.332135	0.684497	-0.350906	-0.0528828
188	1.32403	0.844322	1.01142	0.542305	0.957193	1.96571	0.476615	0.150763	0.910203	-0.0817658	1.11323	0.754894	0.898944	-0.427275	-0.607892	0.658959	0.394594	0.332918	0.337655	0.67907	-0.322831	-0.0771208
188.48	1.28402	0.813916	0.976825	0.535217	0.941055	2.01943	0.478283	0.157032	0.845336	-0.0901649	1.15977	0.742922	0.895785	-0.422787	-0.637619	0.643133	0.394024	0.320891	0.343884	0.667565	-0.301556	-0.107082
188.96	1.20356	0.780536	0.953518	0.523874	0.924805	2.09712	0.478612	0.159746	0.786712	-0.0979623	1.22886	0.737306	0.890763	-0.411663	-0.650304	0.622571	0.404009	0.298646	0.34854	0.649114	-0.285284	-0.132359
189.44	1.08421	0.747204	0.937812	0.517608	0.906526	2.19515	0.480599	0.156678	0.73051	-0.102725	1.31233	0.738878	0.884639	-0.399788	-0.652011	0.595278	0.417023	0.27475	0.350431	0.626589	-0.274305	-0.146211
189.92	0.949822	0.713994	0.921946	0.51615	0.885615	2.29772	0.48153	0.149119	0.667114	-0.0984892	1.39357	0.745003	0.877782	-0.392752	-0.647028	0.566042	0.422043	0.25487	0.352268	0.605815	-0.270301	-0.148393
190.4	0.825522	0.680711	0.893136	0.516702	0.862291	2.38146	0.477231	0.14266	0.589453	-0.0847005	1.4562	0.755535	0.871949	-0.386109	-0.639807	0.54764	0.413821	0.240689	0.358058	0.595361	-0.27478	-0.146657
190.88	0.727124	0.648637	0.848337	0.513822	0.839455	2.43657	0.460512	0.14193	0.497191	-0.0619771	1.49712	0.772795	0.866989	-0.374283	-0.63699	0.551108	0.397576	0.230822	0.372736	0.598135	-0.28987	-0.146973
191.36	0.654275	0.624841	0.790932	0.50729	0.821405	2.46768	0.429845	0.148403	0.403503	-0.0344767	1.52401	0.798373	0.860271	-0.351144	-0.637101	0.579064	0.384292	0.225774	0.398792	0.612586	-0.30774	-0.152406
191.84	0.597223	0.612818	0.734491	0.502237	0.811295	2.49447	0.387848	0.160112	0.319851	-0.00763327	1.55618	0.832913	0.846174	-0.317985	-0.637612	0.620558	0.382901	0.227498	0.432859	0.631956	-0.320757	-0.161283
192.32	0.546484	0.606733	0.687866	0.508339	0.808554	2.52449	0.337477	0.170169	0.253012	0.0186487	1.60334	0.871086	0.820724	-0.278489	-0.630874	0.6599	0.391442	0.239716	0.468883	0.650425	-0.32049	-0.168289
192.8	0.505213	0.593092	0.657066	0.528359	0.806114	2.54252	0.283825	0.173262	0.201067	0.0438468	1.6637	0.904463	0.785483	-0.240123	-0.616084	0.68513	0.398314	0.261423	0.49794	0.66388	-0.302956	-0.169638
193.28	0.488377	0.556319	0.640378	0.558783	0.79969	2.51136	0.228246	0.167918	0.156651	0.0635959	1.72399	0.924949	0.746786	-0.209256	-0.593261	0.692963	0.391726	0.29176	0.516325	0.671978	-0.272523	-0.165694
193.76	0.506224	0.490993	0.63381	0.594537	0.785707	2.41167	0.176648	0.158643	0.118905	0.07219	1.76614	0.930779	0.711675	-0.189122	-0.568372	0.689217	0.369238	0.326899	0.524282	0.674847	-0.239493	-0.16006
194.24	0.559541	0.402963	0.634266	0.631711	0.767483	2.25453	0.135203	0.151867	0.0913996	0.0663153	1.77839	0.92513	0.683664	-0.179538	-0.54335	0.684378	0.340156	0.363303	0.528387	0.673389	-0.21094	-0.156311
194.72	0.631755	0.311024	0.641238	0.67089	0.751931	2.08274	0.10871	0.152688	0.0811884	0.0472627	1.75705	0.914989	0.661804	-0.176891	-0.519998	0.683802	0.318488	0.400185	0.534681	0.668617	-0.18992	-0.156849
195.2	0.700721	0.235899	0.658223	0.706546	0.746138	1.94932	0.0977406	0.16068	0.0919047	0.0232889	1.70412	0.909687	0.64512	-0.17559	-0.497627	0.689794	0.311976	0.43722	0.547234	0.660706	-0.175777	-0.162467
195.68	0.750437	0.181882	0.682727	0.731286	0.749605	1.88439	0.097201	0.17103	0.117838	0.00516371	1.62724	0.918189	0.632746	-0.175084	-0.474731	0.70046	0.315313	0.472675	0.564123	0.651191	-0.163888	-0.170113
196.16	0.780592	0.1457	0.712721	0.739588	0.756248	1.87389	0.096445	0.179042	0.144619	-0.00322091	1.53491	0.940215	0.625094	-0.174108	-0.453129	0.709464	0.31574	0.503239	0.583067	0.642817	-0.154279	-0.174749
196.64	0.805809	0.11668	0.741862	0.718732	0.760108	1.86626	0.0913622	0.181618	0.163953	-0.00403292	1.44215	0.973708	0.621476	-0.168268	-0.43426	0.715772	0.30299	0.52274	0.600362	0.637342	-0.146181	-0.172843
197.12	0.839633	0.0842476	0.767509	0.677127	0.760275	1.82836	0.0798964	0.18041	0.173108	-0.0066869	1.36047	1.0079	0.615264	-0.15885	-0.420874	0.720671	0.276864	0.527817	0.615369	0.635749	-0.138728	-0.165119
197.6	0.887817	0.0476838	0.791527	0.626612	0.759289	1.74801	0.0668429	0.178312	0.175108	-0.0200841	1.30036	1.03215	0.597151	-0.151169	-0.414024	0.727815	0.24799	0.52036	0.627454	0.635831	-0.133641	-0.1549
198.08	0.941875	0.00868694	0.813304	0.585775	0.762792	1.65501	0.0577854	0.177821	0.174329	-0.0479989	1.26052	1.03993	0.561567	-0.146834	-0.414468	0.740265	0.227909	0.502974	0.637223	0.636131	-0.129127	-0.146571
198.56	0.990995	-0.0249529	0.835105	0.566737	0.772263	1.58837	0.0558906	0.178278	0.17275	-0.0838458	1.22747	1.03331	0.511808	-0.143804	-0.421284	0.758227	0.21972	0.478142	0.644609	0.634589	-0.126717	-0.142631
199.04	1.02745	-0.0512471	0.853294	0.570987	0.782085	1.56432	0.0623284	0.176728	0.169672	-0.114319	1.18758	1.02178	0.460248	-0.138221	-0.428105	0.777815	0.216925	0.44735	0.65191	0.628744	-0.126788	-0.143237
199.52	1.05148	-0.0648993	0.864972	0.594563	0.780904	1.56307	0.0752384	0.169776	0.164121	-0.127327	1.12747	1.01664	0.423982	-0.128193	-0.428878	0.791531	0.207963	0.411222	0.662387	0.617798	-0.127457	-0.144709
200	1.06769	-0.0667206	0.865752	0.627006	0.764439	1.54167	0.0954208	0.157873	0.161522	-0.118486	1.04858	1.02262	0.413782	-0.118293	-0.416013	0.791276	0.18541	0.3714	0.678474	0.6021	-0.127665	-0.143458
200.48	1.07358	-0.0592799	0.856116	0.665814	0.733521	1.47377	0.123784	0.144038	0.160703	-0.0920798	0.963688	1.03677	0.426507	-0.116469	-0.386419	0.770194	0.151839	0.33306	0.701789	0.586028	-0.124822	-0.138144
200.96	1.06643	-0.0467861	0.848231	0.708085	0.699309	1.37268	0.159822	0.132679	0.159633	-0.0597229	0.889988	1.05247	0.450862	-0.126535	-0.343462	0.725919	0.114419	0.299703	0.727505	0.571377	-0.119738	-0.130178
201.44	1.052	-0.0366601	0.849542	0.748489	0.673571	1.28132	0.195846	0.126839	0.150598	-0.0362081	0.834598	1.06346	0.473847	-0.146449	-0.292876	0.665814	0.0820762	0.272801	0.749053	0.561726	-0.115249	-0.120895
201.92	1.04643	-0.032195	0.866826	0.778449	0.664595	1.23769	0.222876	0.125045	0.127227	-0.027083	0.792176	1.06845	0.486239	-0.167307	-0.243924	0.598405	0.0578345	0.249658	0.7603	0.558917	-0.111631	-0.113302
202.4	1.06803	-0.0348627	0.900064	0.78615	0.668152	1.25544	0.233458	0.125155	0.0898758	-0.0309331	0.748748	1.06707	0.489737	-0.182462	-0.200465	0.534165	0.0405071	0.224671	0.75899	0.561443	-0.108634	-0.108686
202.88	1.12315	-0.040168	0.941708	0.770172	0.67526	1.30901	0.2322	0.123974	0.0474868	-0.0390966	0.697941	1.06061	0.488248	-0.19193	-0.165403	0.476622	0.0272799	0.195062	0.748242	0.569834	-0.104576	-0.107255
203.36	1.19503	-0.0416537	0.981113	0.731677	0.678102	1.36052	0.223581	0.120858	0.0177301	-0.0414002	0.643153	1.04674	0.485845	-0.201688	-0.135399	0.422726	0.0194404	0.163221	0.733906	0.582517	-0.0937869	-0.108524
203.84	1.24902	-0.0347042	1.01163	0.685752	0.67433	1.38094	0.214608	0.119148	0.0101432	-0.0348732	0.594326	1.02704	0.482418	-0.216781	-0.108874	0.368166	0.0199703	0.134564	0.720646	0.596562	-0.0755071	-0.113418
204.32	1.25753	-0.0202466	1.03384	0.644883	0.665383	1.36308	0.205886	0.122636	0.0220724	-0.0212513	0.552256	1.00656	0.476862	-0.231929	-0.0881537	0.311868	0.0308251	0.112729	0.707822	0.608803	-0.0518186	-0.11955
204.8	1.21813	-0.00608511	1.05004	0.614957	0.657938	1.31427	0.191315	0.132446	0.038859	-0.01007	0.505019	0.993587	0.469539	-0.232571	-0.0751916	0.261708	0.04998	0.0984135	0.690331	0.617625	-0.0308793	-0.125251
205.28	1.15431	8.00228e-05	1.06928	0.588055	0.660471	1.24353	0.166319	0.146806	0.0435767	-0.00618042	0.438555	0.995225	0.462315	-0.204531	-0.0739603	0.22362	0.0696533	0.0886703	0.663774	0.620215	-0.0172851	-0.128322
205.76	1.10109	-0.00763834	1.09224	0.553582	0.676276	1.15816	0.131901	0.160725	0.0266417	-0.00782889	0.340546	1.01083	0.457194	-0.146313	-0.0804386	0.20541	0.0799553	0.0824593	0.625591	0.616895	-0.0144003	-0.126975
206.24	1.07859	-0.0226734	1.117	0.49844	0.704799	1.0575	0.0930346	0.170116	-0.0069243	-0.0104164	0.22291	1.03115	0.454287	-0.0734752	-0.0887857	0.203338	0.0739788	0.0776623	0.58022	0.608884	-0.0220716	-0.120374
206.72	1.07344	-0.0337825	1.13398	0.418457	0.739756	0.947147	0.0572903	0.173029	-0.0388523	-0.00823176	0.112627	1.04662	0.452889	-0.00865701	-0.0939853	0.205003	0.051987	0.0765062	0.532822	0.599709	-0.0342044	-0.110056
207.2	1.05723	-0.0296417	1.13638	0.321335	0.772559	0.843958	0.0285694	0.172336	-0.0523265	-0.00096239	0.0346035	1.04943	0.450852	0.0287624	-0.0960012	0.196129	0.0198858	0.0785305	0.49165	0.590547	-0.0504865	-0.100273
207.68	1.00776	-0.00357631	1.12164	0.218857	0.796505	0.750863	0.00294503	0.171798	-0.0384177	0.00696377	-0.00198238	1.03952	0.449711	0.034795	-0.0992536	0.167566	-0.0113278	0.0819439	0.4611	0.581798	-0.0683373	-0.0941537
208.16	0.932207	0.0373664	1.09615	0.125011	0.80948	0.668078	-0.0244714	0.175	-0.00206488	0.0122646	-0.0109734	1.02101	0.45096	0.022085	-0.111425	0.122607	-0.0323675	0.0819991	0.442438	0.571517	-0.0895501	-0.0943883
208.64	0.866408	0.0806238	1.06848	0.0527312	0.814366	0.585843	-0.0561904	0.181512	0.042849	0.015981	-0.0175323	0.99624	0.454038	0.00728952	-0.134509	0.0736524	-0.0385144	0.0756103	0.435024	0.557151	-0.114953	-0.0993817
209.12	0.849957	0.114067	1.04842	0.00812536	0.821165	0.497178	-0.0880321	0.18798	0.0827346	0.0262414	-0.0418948	0.961908	0.457718	0.00200606	-0.162634	0.0367669	-0.0333114	0.0635443	0.436668	0.537423	-0.143439	-0.105237
209.6	0.896255	0.131602	1.03777	-0.00975707	0.83379	0.402889	-0.117289	0.189968	0.111834	0.0514396	-0.0911979	0.916263	0.459504	0.00883884	-0.185241	0.0230877	-0.0234939	0.0516691	0.444626	0.514587	-0.17255	-0.106296
210.08	0.987656	0.138682	1.03135	-0.0113907	0.852462	0.317616	-0.141581	0.184563	0.133236	0.0939657	-0.156841	0.863484	0.460672	0.0224426	-0.194385	0.0326121	-0.0157283	0.0453306	0.456434	0.494498	-0.198404	-0.0990276
210.56	1.07557	0.142921	1.02552	-0.00609168	0.872562	0.24938	-0.162126	0.172511	0.156082	0.148401	-0.223567	0.811507	0.464132	0.0352651	-0.187072	0.0571992	-0.0116497	0.0484786	0.468848	0.482166	-0.218462	-0.0828931
211.04	1.1163	0.147426	1.01416	-0.000441006	0.889287	0.201432	-0.183584	0.156915	0.180923	0.203515	-0.285884	0.773587	0.473969	0.0414809	-0.168554	0.0883595	-0.00804634	0.059864	0.478602	0.481696	-0.236161	-0.0614988
211.52	1.09006	0.147798	0.994425	0.00470488	0.899919	0.167219	-0.206371	0.141497	0.206183	0.246744	-0.341032	0.755508	0.488446	0.0386566	-0.14552	0.113943	-0.0014005	0.0758706	0.481102	0.492215	-0.252268	-0.0421781
212	1.01454	0.137491	0.968418	0.0174412	0.907102	0.132304	-0.225522	0.127786	0.220987	0.272745	-0.397319	0.751995	0.505393	0.0245245	-0.12465	0.134433	0.00895612	0.0924572	0.474714	0.513077	-0.270919	-0.0311693
212.48	0.926776	0.109289	0.939874	0.0444393	0.917172	0.0899392	-0.235725	0.116446	0.218774	0.280308	-0.455327	0.754423	0.522888	0.000160211	-0.103765	0.15251	0.0180521	0.106535	0.458823	0.541109	-0.292482	-0.0274914
212.96	0.864216	0.0651081	0.912903	0.0936755	0.934435	0.0461743	-0.234235	0.105784	0.19847	0.272709	-0.50802	0.753301	0.543316	-0.0300339	-0.0791026	0.172623	0.0213342	0.114585	0.434672	0.575666	-0.312748	-0.0278003
213.44	0.835575	0.0103584	0.889908	0.157598	0.957449	0.0181791	-0.224295	0.0945041	0.1722	0.257921	-0.548869	0.748826	0.57187	-0.0580957	-0.0469005	0.192224	0.0171945	0.11602	0.404499	0.615632	-0.327754	-0.0256908
213.92	0.830673	-0.0433457	0.873599	0.221294	0.981954	0.0397585	-0.214166	0.0830141	0.153857	0.243092	-0.572438	0.745548	0.612023	-0.0726789	-0.00773124	0.20398	0.0112759	0.108286	0.372253	0.657293	-0.330052	-0.0159416
214.4	0.824121	-0.0909396	0.862722	0.276559	1.00395	0.12841	-0.209748	0.0724937	0.155156	0.236951	-0.582345	0.749761	0.660621	-0.0655736	0.0391088	0.199455	0.0110668	0.0919091	0.341701	0.69664	-0.318774	0.00043699
214.88	0.801476	-0.130507	0.855901	0.313225	1.01898	0.283301	-0.213451	0.0654014	0.179771	0.244397	-0.577272	0.765912	0.7087	-0.0386589	0.0874035	0.175251	0.0225227	0.0688011	0.315369	0.73089	-0.298992	0.0182156
215.36	0.765449	-0.159232	0.849733	0.331172	1.03256	0.475157	-0.222068	0.0618576	0.224575	0.263686	-0.561139	0.793647	0.74637	-0.0023848	0.130647	0.13808	0.045006	0.0443667	0.297655	0.755672	-0.27715	0.0316062
215.84	0.735556	-0.179604	0.84308	0.337534	1.04343	0.660899	-0.237154	0.0606768	0.28406	0.287656	-0.532076	0.831846	0.771337	0.0282497	0.16275	0.0992626	0.0730622	0.024174	0.287832	0.772922	-0.261384	0.0401273
216.32	0.729657	-0.190792	0.836261	0.339164	1.05304	0.794925	-0.259768	0.0586912	0.351413	0.307506	-0.490796	0.878425	0.791499	0.0427593	0.181404	0.0724213	0.100802	0.0119946	0.284201	0.783746	-0.258752	0.0489954
216.8	0.75047	-0.191732	0.833263	0.340997	1.05932	0.853141	-0.294161	0.0531176	0.421774	0.321462	-0.444146	0.925358	0.817512	0.0358568	0.189444	0.0618965	0.125784	0.00838832	0.282616	0.792112	-0.266194	0.0670483
217.28	0.784511	-0.186412	0.836362	0.348996	1.05824	0.842148	-0.336558	0.0436145	0.493406	0.329997	-0.400082	0.962819	0.856143	0.0141407	0.195081	0.0652948	0.150178	0.0115934	0.277926	0.796996	-0.280936	0.0988507
217.76	0.812777	-0.178504	0.847757	0.363855	1.04668	0.791817	-0.380057	0.0321247	0.557647	0.339223	-0.369946	0.977539	0.90278	-0.0131592	0.207622	0.0695602	0.175036	0.018888	0.267446	0.800143	-0.296291	0.142143
218.24	0.822568	-0.173237	0.867987	0.381594	1.02667	0.735239	-0.412648	0.0221936	0.609457	0.353577	-0.356481	0.961235	0.947609	-0.0369714	0.233217	0.0653105	0.200031	0.0294657	0.252542	0.802421	-0.305837	0.187247
218.72	0.821514	-0.17177	0.895142	0.395179	0.999699	0.690388	-0.430203	0.0162821	0.640784	0.372427	-0.358379	0.914966	0.977764	-0.0536358	0.269774	0.0475522	0.221998	0.0424552	0.234878	0.806774	-0.311646	0.223132
219.2	0.824899	-0.172831	0.924165	0.38473	0.973022	0.658569	-0.435149	0.0139246	0.653285	0.391634	-0.371004	0.846562	0.991304	-0.0634813	0.306816	0.0228519	0.238386	0.0564722	0.217371	0.817372	-0.31644	0.247269
219.68	0.852552	-0.172529	0.949473	0.341279	0.949158	0.629194	-0.436377	0.0131561	0.646853	0.407777	-0.394999	0.767549	0.994643	-0.071179	0.331588	0.00303418	0.249643	0.068488	0.202014	0.835122	-0.32228	0.262932
220.16	0.905611	-0.168031	0.964402	0.265051	0.928535	0.596127	-0.442835	0.0106803	0.626861	0.419421	-0.431334	0.682653	0.998629	-0.0773457	0.336337	-0.00228624	0.260309	0.0763967	0.187923	0.855592	-0.333761	0.27857
220.64	0.966386	-0.157648	0.960642	0.174055	0.907862	0.564424	-0.457269	0.00508454	0.596124	0.427303	-0.486675	0.593043	1.01368	-0.0787093	0.323999	0.0124755	0.276216	0.0785615	0.175245	0.873348	-0.355369	0.297251
221.12	1.0121	-0.14212	0.934075	0.0947902	0.88567	0.539685	-0.47348	-0.00415549	0.557158	0.429885	-0.556891	0.500565	1.04	-0.0694767	0.302675	0.0396761	0.299884	0.0764097	0.164156	0.882477	-0.386517	0.316674
221.6	1.0293	-0.123918	0.887746	0.0473456	0.863348	0.525493	-0.483473	-0.0153504	0.512286	0.426016	-0.631301	0.412265	1.07049	-0.0446778	0.283422	0.066701	0.329911	0.0696877	0.156879	0.883684	-0.424903	0.331242
222.08	1.02761	-0.106179	0.828887	0.0334354	0.841158	0.514674	-0.481795	-0.0282697	0.466613	0.416897	-0.700958	0.338896	1.09552	-0.00420013	0.276375	0.0840682	0.359795	0.0583877	0.155899	0.879695	-0.462049	0.33622
222.56	1.03205	-0.0903504	0.768058	0.0420315	0.826665	0.495565	-0.46887	-0.0426405	0.427303	0.409116	-0.756191	0.287855	1.108	0.0431767	0.283956	0.0875024	0.383285	0.0412459	0.16233	0.874682	-0.490529	0.331726
223.04	1.07073	-0.0796685	0.714204	0.0470374	0.82388	0.457099	-0.449887	-0.0582221	0.401989	0.409069	-0.801294	0.255258	1.11046	0.0872215	0.302085	0.0822733	0.396561	0.0176813	0.173744	0.872383	-0.505684	0.321299
223.52	1.15561	-0.07256	0.672142	0.0356982	0.832939	0.393354	-0.431355	-0.0728944	0.399923	0.422241	-0.850091	0.229585	1.11037	0.119478	0.32408	0.0747854	0.399126	-0.0111916	0.187899	0.870809	-0.508053	0.311453
224	1.27192	-0.0663793	0.641844	0.0099969	0.851531	0.304991	-0.421873	-0.0831663	0.420451	0.446283	-0.913704	0.202538	1.11796	0.14007	0.343419	0.0694778	0.395501	-0.0415523	0.201691	0.866832	-0.502131	0.302552
224.48	1.38565	-0.059901	0.623899	-0.0194736	0.875209	0.187996	-0.428552	-0.0854361	0.461555	0.474534	-0.988898	0.172776	1.13487	0.156455	0.355913	0.0654071	0.394374	-0.0697303	0.214314	0.859243	-0.495167	0.294359
224.96	1.46651	-0.0574968	0.620357	-0.0423773	0.896239	0.0510251	-0.454359	-0.0790186	0.512401	0.49656	-1.06811	0.149685	1.15523	0.179306	0.361189	0.0561583	0.403332	-0.0945697	0.225578	0.849637	-0.491585	0.283735
225.44	1.49756	-0.0613678	0.636938	-0.0561477	0.911389	-0.0904641	-0.497266	-0.0681562	0.562261	0.506136	-1.13335	0.140805	1.16721	0.211631	0.362327	0.0356302	0.427676	-0.118205	0.238147	0.842176	-0.489542	0.26946
225.92	1.48702	-0.0771123	0.675762	-0.0597625	0.916921	-0.200133	-0.548703	-0.0586243	0.599073	0.502774	-1.17351	0.150333	1.16238	0.248541	0.36539	0.00427767	0.466655	-0.144426	0.252226	0.840848	-0.487104	0.252708
226.4	1.45098	-0.106095	0.73101	-0.0591874	0.911146	-0.245112	-0.595492	-0.0541804	0.615547	0.491023	-1.19356	0.17076	1.14102	0.281059	0.377789	-0.0314992	0.512913	-0.173384	0.266174	0.846519	-0.483021	0.235327
226.88	1.40803	-0.144837	0.789162	-0.0562062	0.899891	-0.199511	-0.623731	-0.0538007	0.608667	0.474204	-1.21075	0.195536	1.11118	0.302045	0.400646	-0.0635915	0.553413	-0.202801	0.276329	0.856373	-0.482316	0.218453
227.36	1.36235	-0.182456	0.835044	-0.0478103	0.886184	-0.0745424	-0.627519	-0.0519817	0.582738	0.451522	-1.239	0.224612	1.08398	0.313711	0.432493	-0.0883211	0.577293	-0.227393	0.278174	0.865974	-0.487926	0.201201
227.84	1.31191	-0.209452	0.857475	-0.033428	0.876361	0.0967914	-0.611447	-0.0440045	0.554133	0.419727	-1.28337	0.258542	1.06407	0.325194	0.468975	-0.106299	0.580131	-0.242292	0.270117	0.8715	-0.496833	0.185384
228.32	1.25142	-0.21971	0.854943	-0.0215586	0.873315	0.269045	-0.585853	-0.0292028	0.539597	0.376674	-1.33478	0.297668	1.04816	0.349007	0.509804	-0.12381	0.568139	-0.244208	0.25528	0.871859	-0.505722	0.173716
228.8	1.18942	-0.213345	0.83014	-0.0119745	0.879418	0.412555	-0.564032	-0.012428	0.5532	0.323583	-1.37887	0.335353	1.02881	0.387241	0.556432	-0.145329	0.552077	-0.233514	0.242509	0.867685	-0.506585	0.167441
229.28	1.14226	-0.192366	0.787694	-0.00631114	0.892783	0.520189	-0.554245	-0.000498247	0.592128	0.265197	-1.40331	0.362564	1.00119	0.433497	0.614077	-0.17511	0.540199	-0.212306	0.240855	0.862287	-0.495812	0.167855
229.76	1.13127	-0.16442	0.729953	0.00658419	0.910784	0.597669	-0.555567	0.00268989	0.641425	0.206179	-1.40838	0.372332	0.969465	0.472375	0.684614	-0.205582	0.533502	-0.183148	0.255159	0.856788	-0.477585	0.173254
230.24	1.16062	-0.130082	0.663584	0.0355629	0.930569	0.655659	-0.556039	-0.000737873	0.676121	0.151807	-1.39624	0.366502	0.940381	0.494128	0.761451	-0.232977	0.526236	-0.150813	0.283648	0.853157	-0.460211	0.182955
230.72	1.22072	-0.0932299	0.597661	0.0813635	0.946734	0.696475	-0.546311	-0.00512274	0.681337	0.105674	-1.36359	0.35405	0.920975	0.496099	0.838335	-0.251481	0.509318	-0.118831	0.318806	0.850525	-0.451271	0.197583
231.2	1.28725	-0.056169	0.54962	0.133995	0.954527	0.718364	-0.520447	-0.00579907	0.654708	0.0697139	-1.31421	0.34459	0.913259	0.483973	0.903741	-0.260784	0.480714	-0.0905286	0.352237	0.846005	-0.451646	0.217893
231.68	1.33299	-0.0231802	0.533068	0.174022	0.950461	0.723641	-0.481417	-0.000741444	0.610065	0.0448593	-1.24934	0.340997	0.9143	0.4683	0.95105	-0.263184	0.448489	-0.0696899	0.379861	0.837879	-0.454606	0.242425
232.16	1.35131	0.00247604	0.555953	0.18908	0.933981	0.717592	-0.436903	0.00742334	0.565068	0.0316236	-1.17966	0.342811	0.920637	0.456561	0.981539	-0.260255	0.425926	-0.0588896	0.400058	0.825409	-0.452482	0.26609
232.64	1.35287	0.0149403	0.60958	0.177128	0.910451	0.704691	-0.396777	0.016265	0.534717	0.0299754	-1.12149	0.349199	0.930856	0.448364	1.0008	-0.252549	0.422551	-0.0600986	0.416706	0.811429	-0.44299	0.281766
233.12	1.36418	0.016713	0.676582	0.147605	0.884987	0.682309	-0.364948	0.0239206	0.516046	0.0377618	-1.09045	0.359392	0.942983	0.439087	1.01655	-0.236059	0.437771	-0.0726496	0.43187	0.799498	-0.42469	0.284222
233.6	1.40199	0.0124384	0.737991	0.11593	0.861794	0.643882	-0.341782	0.0322491	0.49941	0.05313	-1.08573	0.376729	0.953815	0.425123	1.03178	-0.204916	0.476321	-0.09551	0.444458	0.79156	-0.403084	0.274335
234.08	1.4638	0.00602006	0.784397	0.0874812	0.843564	0.58064	-0.324297	0.0432081	0.471575	0.0695522	-1.09156	0.400522	0.956809	0.404582	1.0467	-0.157702	0.490787	-0.123967	0.452186	0.786102	-0.379877	0.25793
234.56	1.52597	-0.000213804	0.818679	0.0620846	0.827789	0.495645	-0.311219	0.0576683	0.430493	0.0808526	-1.08869	0.42338	0.945344	0.380847	1.05914	-0.0996136	0.490481	-0.152964	0.453432	0.779765	-0.357456	0.243999
235.04	1.55962	-0.00525623	0.846928	0.0400123	0.813538	0.4022	-0.30346	0.0743412	0.385372	0.0840985	-1.06417	0.440003	0.919834	0.355586	1.06706	-0.0388504	0.479212	-0.178265	0.448007	0.768296	-0.340266	0.237167
235.52	1.55324	-0.0114986	0.874251	0.0208926	0.804128	0.314909	-0.304545	0.0901668	0.346878	0.0790373	-1.0181	0.445434	0.887761	0.328961	1.06841	0.0135677	0.467226	-0.199476	0.439756	0.752136	-0.32758	0.235024
236	1.51198	-0.0177649	0.898283	0.0112851	0.805707	0.239597	-0.31394	0.102299	0.323261	0.0730872	-0.967904	0.443218	0.859856	0.299397	1.06127	0.0499665	0.463442	-0.218041	0.432303	0.735235	-0.317113	0.23378
236.48	1.45961	-0.0212997	0.913229	0.0202562	0.821847	0.171333	-0.329011	0.108556	0.31687	0.071683	-0.928195	0.440921	0.84528	0.26505	1.04907	0.0708556	0.468427	-0.236973	0.428205	0.724808	-0.308105	0.229472
236.96	1.41007	-0.0202764	0.915736	0.0453991	0.852432	0.0999548	-0.344366	0.10784	0.315695	0.0780204	-0.905416	0.442602	0.846874	0.228088	1.03501	0.0810433	0.474148	-0.259189	0.428119	0.723643	-0.29541	0.22229
237.44	1.36533	-0.0159756	0.908167	0.0774097	0.887865	0.0117643	-0.354816	0.100806	0.309609	0.0890194	-0.89065	0.448278	0.858874	0.192355	1.02194	0.0868513	0.472461	-0.282887	0.429314	0.728647	-0.282221	0.213976
237.92	1.31475	-0.014998	0.902283	0.102881	0.919171	-0.0920856	-0.357296	0.0884927	0.289005	0.0957863	-0.866706	0.453983	0.873753	0.163449	1.01227	0.08859	0.461681	-0.305926	0.430623	0.73439	-0.271096	0.205066
238.4	1.25271	-0.022031	0.905157	0.109698	0.939794	-0.202818	-0.349516	0.0727397	0.207344	0.0939378	-0.824613	0.456439	0.883748	0.144694	1.00772	0.0875368	0.449157	-0.323794	0.431466	0.733795	-0.266852	0.195117
238.88	1.18944	-0.0355187	0.913236	0.0943648	0.95156	-0.309518	-0.334867	0.0562124	0.172535	0.084928	-0.766555	0.454057	0.885379	0.138535	1.00588	0.0782583	0.444135	-0.335529	0.431871	0.72607	-0.270869	0.183079
239.36	1.14403	-0.0493416	0.917851	0.0574928	0.958561	-0.400417	-0.317207	0.03889	0.152884	0.0753816	-0.709802	0.451158	0.878411	0.142187	1.00604	0.0662411	0.452239	-0.337815	0.433876	0.71282	-0.280146	0.169635
239.84	1.13004	-0.0569195	0.908684	0.00141377	0.96233	-0.473877	-0.300761	0.0193181	0.159753	0.0744346	-0.66617	0.452515	0.863136	0.153204	1.00434	0.059337	0.46855	-0.328594	0.437969	0.700049	-0.287689	0.157806
240.32	1.14091	-0.0540422	0.881434	-0.0637875	0.960983	-0.535032	-0.290866	-0.00455986	0.191132	0.0826865	-0.63953	0.461246	0.841988	0.169306	1.00118	0.0656335	0.482303	-0.306087	0.443556	0.691273	-0.286194	0.149017
240.8	1.15688	-0.0441075	0.845605	-0.130173	0.948432	-0.583602	-0.28933	-0.0339819	0.233647	0.0893672	-0.617818	0.479497	0.817712	0.188137	0.997876	0.0885869	0.484157	-0.269204	0.448311	0.686985	-0.274404	0.141395
241.28	1.15213	-0.0366098	0.815637	-0.189351	0.922514	-0.622947	-0.291036	-0.0659713	0.271772	0.0835063	-0.584385	0.508451	0.793208	0.210333	0.990288	0.119944	0.470679	-0.222	0.449032	0.684577	-0.257114	0.132447
241.76	1.11755	-0.0375714	0.802368	-0.228924	0.884333	-0.654502	-0.290786	-0.0948056	0.292836	0.0587572	-0.534479	0.546158	0.769174	0.235931	0.978575	0.148595	0.447634	-0.172065	0.445047	0.683431	-0.240422	0.117653
242.24	1.06094	-0.0492841	0.805327	-0.245528	0.838263	-0.679974	-0.281752	-0.115298	0.296059	0.0165382	-0.478781	0.590374	0.745544	0.267762	0.964748	0.164929	0.423342	-0.128002	0.437642	0.683678	-0.227899	0.0996086
242.72	0.993622	-0.0641365	0.816838	-0.243927	0.787797	-0.715559	-0.267397	-0.125742	0.29157	-0.0325523	-0.425729	0.635347	0.722716	0.303135	0.948984	0.166784	0.402125	-0.0947531	0.432926	0.685592	-0.219836	0.0846593
243.2	0.923728	-0.0797717	0.825884	-0.241105	0.734213	-0.772051	-0.251078	-0.129526	0.291292	-0.0798212	-0.382853	0.675225	0.704341	0.334354	0.932664	0.161254	0.38352	-0.0692823	0.436831	0.690254	-0.212774	0.0796345
243.68	0.84533	-0.093075	0.826798	-0.252754	0.675671	-0.86323	-0.24091	-0.133409	0.299985	-0.116252	-0.343096	0.705216	0.694597	0.350228	0.912826	0.157801	0.36167	-0.0446242	0.454353	0.696803	-0.206266	0.0845885
244.16	0.754757	-0.107238	0.818784	-0.285707	0.61572	-0.979098	-0.238261	-0.142993	0.311565	-0.13979	-0.291158	0.723252	0.698097	0.343951	0.885971	0.161328	0.33384	-0.0170383	0.48257	0.702204	-0.20093	0.0929685
244.64	0.655306	-0.131931	0.808179	-0.332384	0.556598	-1.09856	-0.238303	-0.158045	0.314159	-0.150746	-0.223007	0.730891	0.714809	0.317832	0.851105	0.171096	0.300145	0.00914061	0.514663	0.704164	-0.198987	0.0952412
245.12	0.563425	-0.170266	0.795998	-0.375215	0.506082	-1.18988	-0.231453	-0.172687	0.301953	-0.151526	-0.142451	0.73155	0.738781	0.285858	0.816641	0.181728	0.266805	0.0247241	0.540972	0.701596	-0.194142	0.0865597
245.6	0.491792	-0.219864	0.780462	-0.397595	0.467651	-1.23424	-0.212908	-0.180129	0.279287	-0.149228	-0.0618292	0.733282	0.761719	0.26211	0.797654	0.186606	0.239343	0.01886	0.555039	0.695892	-0.180319	0.0695362
246.08	0.446094	-0.274118	0.755729	-0.389145	0.44062	-1.22562	-0.184097	-0.177042	0.259446	-0.150022	0.0107385	0.741823	0.77682	0.257206	0.807805	0.186448	0.220644	-0.0095432	0.556932	0.689786	-0.154357	0.0525087
246.56	0.411095	-0.321367	0.721624	-0.356645	0.421932	-1.18422	-0.153725	-0.166272	0.257328	-0.154169	0.0725102	0.75906	0.783181	0.269945	0.8501	0.179985	0.209466	-0.0520301	0.549748	0.686939	-0.115777	0.0425197
247.04	0.370748	-0.356631	0.682389	-0.317431	0.407796	-1.13955	-0.126968	-0.153188	0.273235	-0.155493	0.126927	0.780223	0.786884	0.290647	0.913828	0.168857	0.200477	-0.0955879	0.539193	0.691199	-0.0720059	0.040705
247.52	0.314113	-0.377957	0.648446	-0.288203	0.39599	-1.12005	-0.106401	-0.143827	0.292235	-0.140576	0.172831	0.799422	0.793674	0.310578	0.977354	0.154609	0.189453	-0.128422	0.527591	0.702541	-0.0341306	0.0428648
248	0.243066	-0.388079	0.627998	-0.279101	0.384973	-1.13717	-0.0870584	-0.13916	0.299804	-0.0979992	0.204124	0.810864	0.806711	0.325775	1.02055	0.140782	0.174717	-0.147569	0.514736	0.719651	-0.00731391	0.042742
248.48	0.178211	-0.389753	0.624118	-0.282034	0.373691	-1.17852	-0.0684806	-0.135511	0.291951	-0.031704	0.222308	0.816288	0.824979	0.336923	1.03446	0.128838	0.158865	-0.156346	0.499243	0.735774	0.00470571	0.0370228
248.96	0.129882	-0.383466	0.634172	-0.287809	0.36323	-1.22251	-0.0525742	-0.128256	0.278328	0.0403868	0.22938	0.820818	0.843832	0.344563	1.02169	0.118043	0.14596	-0.159371	0.480772	0.745952	0.00348208	0.027912
249.44	0.0988602	-0.368512	0.652692	-0.284612	0.3535	-1.25044	-0.044634	-0.115081	0.276879	0.093491	0.237942	0.830767	0.860491	0.344302	0.994717	0.105063	0.140543	-0.158954	0.461775	0.74502	-0.00827852	0.0184615
249.92	0.0784683	-0.347061	0.677257	-0.273008	0.344314	-1.25674	-0.0478741	-0.0978344	0.292403	0.1127	0.261314	0.843852	0.875167	0.331328	0.9641	0.0855017	0.14383	-0.154464	0.443505	0.73513	-0.0247619	0.0109734
250.4	0.0586051	-0.325618	0.709931	-0.257642	0.33217	-1.25538	-0.0572675	-0.0814182	0.312331	0.101981	0.29885	0.851847	0.890567	0.305791	0.931404	0.0556311	0.152497	-0.146169	0.42625	0.720254	-0.0418759	0.00359796
250.88	0.0389346	-0.310725	0.752526	-0.25062	0.315106	-1.27123	-0.0633759	-0.0689278	0.311404	0.0772772	0.335694	0.843935	0.908613	0.275501	0.892157	0.015783	0.159923	-0.13538	0.407718	0.707252	-0.0518606	-0.00576279
251.36	0.0280876	-0.310684	0.804314	-0.255242	0.296556	-1.31922	-0.0526026	-0.0629793	0.276769	0.0573083	0.354179	0.819022	0.928415	0.253481	0.847632	-0.0306082	0.159448	-0.127793	0.386886	0.699515	-0.0494937	-0.0176525
251.84	0.0418144	-0.322931	0.85805	-0.25789	0.277735	-1.39223	-0.0198573	-0.0616407	0.213952	0.0465299	0.35042	0.785655	0.946733	0.247948	0.799731	-0.0775262	0.148928	-0.125038	0.362119	0.695932	-0.0364415	-0.0313803
252.32	0.0878775	-0.339417	0.903609	-0.250502	0.266008	-1.47073	0.0300637	-0.0611949	0.15003	0.0362222	0.335136	0.754392	0.958073	0.257429	0.756913	-0.121277	0.130145	-0.126542	0.333316	0.691491	-0.0190613	-0.0443637
252.8	0.160379	-0.351711	0.936248	-0.228268	0.266553	-1.53161	0.0886327	-0.0561774	0.114034	0.0165622	0.326195	0.730597	0.956949	0.272964	0.725758	-0.158781	0.11052	-0.128444	0.300461	0.684518	-0.00652088	-0.0550886
253.28	0.246695	-0.352082	0.953859	-0.192146	0.277148	-1.56943	0.143444	-0.0428195	0.117681	-0.0143196	0.336219	0.710094	0.940502	0.286639	0.708779	-0.192376	0.0965877	-0.129833	0.265229	0.675568	-0.00317249	-0.0635097
253.76	0.330833	-0.343591	0.962159	-0.154463	0.291543	-1.6029	0.192646	-0.0181985	0.1449	-0.0495795	0.360174	0.682819	0.908852	0.299451	0.698718	-0.22176	0.0937142	-0.134175	0.229337	0.669823	-0.00654909	-0.071401
254.24	0.403253	-0.332216	0.965033	-0.120375	0.298534	-1.65546	0.236133	0.0136951	0.170282	-0.0765279	0.382111	0.648441	0.865717	0.317264	0.69035	-0.245429	0.0994859	-0.146745	0.195552	0.669276	-0.0111554	-0.0785593
254.72	0.453617	-0.329144	0.963907	-0.0874765	0.291407	-1.7384	0.278542	0.0457092	0.182255	-0.0870069	0.385299	0.617054	0.818862	0.347392	0.675968	-0.263269	0.109625	-0.168786	0.167324	0.674771	-0.0128672	-0.0830996
255.2	0.481242	-0.340376	0.959585	-0.0453799	0.270974	-1.83447	0.317414	0.0690306	0.188429	-0.0846613	0.374661	0.605453	0.776428	0.389603	0.65673	-0.279412	0.118238	-0.195333	0.145593	0.679458	-0.0106943	-0.0829389
255.68	0.481672	-0.366116	0.951238	0.0214433	0.242853	-1.90906	0.352039	0.0787253	0.211057	-0.0782332	0.36417	0.620628	0.744766	0.437289	0.635341	-0.302321	0.122802	-0.220177	0.130067	0.678123	-0.00897054	-0.0779882
256.16	0.458298	-0.400057	0.938099	0.103521	0.218577	-1.92879	0.377865	0.0765428	0.262574	-0.0737031	0.370487	0.65422	0.7254	0.479501	0.615753	-0.337083	0.123793	-0.239262	0.11743	0.669777	-0.00985555	-0.067851
256.64	0.417457	-0.434374	0.927103	0.18414	0.202517	-1.88291	0.402251	0.069569	0.3384	-0.0748602	0.398914	0.687569	0.714852	0.509953	0.597289	-0.385801	0.122308	-0.255382	0.104938	0.657536	-0.00867003	-0.0545753
257.12	0.366129	-0.460994	0.920709	0.250245	0.19345	-1.79341	0.432753	0.0644663	0.417407	-0.0796773	0.439316	0.704739	0.707043	0.526725	0.579476	-0.442802	0.118364	-0.276253	0.0919285	0.646182	-0.00152211	-0.0381162
257.6	0.313707	-0.480676	0.922433	0.297434	0.18531	-1.69772	0.476157	0.0641604	0.481402	-0.0845855	0.47437	0.699614	0.693964	0.532737	0.56032	-0.498974	0.110759	-0.306398	0.0800148	0.638919	0.0133323	-0.0173684
258.08	0.263177	-0.492581	0.933605	0.337808	0.172725	-1.6296	0.53201	0.0667145	0.528929	-0.085492	0.49382	0.683311	0.671189	0.530299	0.536176	-0.5453	0.0964452	-0.342965	0.0695885	0.634042	0.0291711	0.00454908
258.56	0.214128	-0.498206	0.952248	0.383483	0.155128	-1.60725	0.594168	0.0671022	0.577097	-0.0815208	0.495637	0.670235	0.635747	0.521004	0.509589	-0.574565	0.0786432	-0.379651	0.0592175	0.627916	0.0373768	0.0234116
259.04	0.163414	-0.500543	0.980148	0.43515	0.137594	-1.63593	0.649441	0.0645045	0.646046	-0.0701133	0.485386	0.666839	0.589348	0.504355	0.479541	-0.585474	0.0625831	-0.409942	0.0472337	0.618247	0.0328564	0.033415
259.52	0.113223	-0.502771	1.01971	0.479344	0.125028	-1.70943	0.687743	0.061864	0.738864	-0.0530225	0.46316	0.668934	0.536543	0.480404	0.45188	-0.581242	0.0566881	-0.431772	0.0317734	0.607781	0.0148103	0.0318014
260	0.0707931	-0.506784	1.07351	0.495309	0.115843	-1.81067	0.707415	0.0633406	0.841056	-0.0324806	0.430163	0.664594	0.481849	0.451824	0.429676	-0.564205	0.0656621	-0.452129	0.0132755	0.601469	-0.00874278	0.0183792
260.48	0.0459159	-0.51422	1.13861	0.479271	0.10822	-1.91767	0.710921	0.0696838	0.934352	-0.0112097	0.385697	0.645904	0.431328	0.420966	0.413227	-0.539645	0.087299	-0.475449	-0.00512468	0.602902	-0.03373	-0.00185431
260.96	0.0440337	-0.52405	1.20548	0.437218	0.0982759	-2.00115	0.706342	0.0788405	1.01244	0.0119878	0.335355	0.613328	0.389759	0.39235	0.401665	-0.516313	0.113747	-0.502524	-0.0215817	0.613044	-0.0581979	-0.0235082
261.44	0.0617695	-0.538029	1.26354	0.394092	0.0878841	-2.03891	0.697189	0.086508	1.08319	0.0389901	0.291179	0.574663	0.358569	0.370525	0.391096	-0.502743	0.13496	-0.524512	-0.034247	0.629054	-0.0842439	-0.0417288
261.92	0.0918786	-0.557937	1.3015	0.370988	0.0777649	-2.02856	0.684913	0.0919668	1.15932	0.0715757	0.268775	0.536544	0.336169	0.359175	0.375524	-0.500663	0.14293	-0.533215	-0.043563	0.64592	-0.109424	-0.0562548
262.4	0.120337	-0.585872	1.31628	0.374661	0.0718512	-1.98908	0.670426	0.0981085	1.24356	0.107362	0.273878	0.504232	0.319718	0.362381	0.354022	-0.508022	0.138564	-0.524761	-0.0499583	0.660681	-0.127729	-0.0677723
262.88	0.135365	-0.622762	1.3103	0.392496	0.0682893	-1.9528	0.6556	0.11019	1.32275	0.140926	0.300825	0.479566	0.306647	0.380852	0.324661	-0.520791	0.128585	-0.503866	-0.0541457	0.670567	-0.13236	-0.0778897
263.36	0.13059	-0.665142	1.28858	0.410353	0.0625044	-1.94176	0.647992	0.131297	1.37917	0.166938	0.338346	0.46224	0.29536	0.412317	0.288248	-0.533394	0.121345	-0.478092	-0.0562283	0.673822	-0.117374	-0.0871521
263.84	0.109433	-0.708954	1.25698	0.416269	0.0482563	-1.95565	0.653929	0.157667	1.4002	0.185334	0.380974	0.453766	0.284491	0.453168	0.245664	-0.541794	0.12237	-0.455676	-0.0563056	0.667284	-0.088606	-0.0945323
264.32	0.0865956	-0.744433	1.21587	0.408983	0.0223235	-1.97718	0.673998	0.182148	1.3937	0.199609	0.429402	0.451615	0.27447	0.498504	0.199475	-0.547022	0.132478	-0.437607	-0.0547407	0.651836	-0.055409	-0.0991797
264.8	0.0811575	-0.770647	1.16897	0.398441	-0.011493	-1.98643	0.702267	0.197136	1.38179	0.214304	0.493115	0.452349	0.265137	0.541774	0.154645	-0.54913	0.146489	-0.421048	-0.0524718	0.630431	-0.0290746	-0.101542
265.28	0.105605	-0.787285	1.12185	0.395301	-0.0428397	-1.97713	0.727209	0.198815	1.38245	0.230288	0.576739	0.450134	0.254124	0.577648	0.117539	-0.550999	0.158911	-0.40201	-0.0459366	0.607898	-0.0136577	-0.102333
265.76	0.156958	-0.80071	1.08147	0.405647	-0.068207	-1.95433	0.740594	0.189023	1.40141	0.245132	0.672824	0.441593	0.240601	0.600009	0.0945406	-0.550933	0.166927	-0.380405	-0.0326797	0.590549	-0.00454258	-0.101007
266.24	0.220094	-0.814412	1.05571	0.427308	-0.0846037	-1.93138	0.740417	0.172916	1.42865	0.255282	0.757248	0.42545	0.229285	0.607167	0.0901449	-0.549325	0.168494	-0.360591	-0.00920235	0.580567	-7.24597e-05	-0.0980752
266.72	0.279087	-0.825565	1.04596	0.447258	-0.102718	-1.91344	0.729529	0.15493	1.44404	0.260333	0.807795	0.407427	0.22257	0.59983	0.102074	-0.546972	0.163653	-0.347765	0.0214014	0.576154	0.0022372	-0.0950007
267.2	0.322545	-0.828653	1.04759	0.444738	-0.128654	-1.8931	0.714755	0.137965	1.43886	0.264005	0.807368	0.392858	0.222494	0.582429	0.121503	-0.545814	0.153651	-0.344293	0.0545392	0.572754	0.00081307	-0.0928366
267.68	0.354617	-0.821658	1.04923	0.407208	-0.165062	-1.86096	0.701116	0.123279	1.41867	0.266325	0.755297	0.38494	0.225727	0.562835	0.136191	-0.547783	0.140329	-0.347297	0.0818578	0.567628	-0.00889275	-0.0924441
268.16	0.387682	-0.804451	1.04755	0.333789	-0.203505	-1.81445	0.689153	0.11122	1.39588	0.264797	0.666823	0.386703	0.226167	0.546388	0.13534	-0.553078	0.130249	-0.349668	0.0971745	0.559878	-0.0241237	-0.0933228
268.64	0.432907	-0.785801	1.0447	0.240902	-0.231582	-1.75759	0.672026	0.102216	1.38869	0.249029	0.568418	0.393076	0.217268	0.533932	0.115335	-0.559444	0.128295	-0.344518	0.102049	0.550159	-0.043742	-0.0921664
269.12	0.483091	-0.772253	1.04857	0.149777	-0.239601	-1.70599	0.649982	0.0952338	1.39821	0.216262	0.484168	0.397896	0.198066	0.522911	0.0808534	-0.561807	0.140462	-0.328003	0.0997297	0.540215	-0.0664134	-0.0853545
269.6	0.520387	-0.768655	1.06635	0.0771337	-0.227306	-1.67488	0.62494	0.0880239	1.41676	0.165759	0.427653	0.395348	0.175222	0.511406	0.0415753	-0.557992	0.16599	-0.299656	0.0953904	0.529141	-0.0896439	-0.0717869
270.08	0.530105	-0.770449	1.09838	0.0227373	-0.206273	-1.67609	0.601223	0.0782076	1.43067	0.10654	0.404798	0.382283	0.159052	0.502169	0.00667248	-0.549872	0.198272	-0.263805	0.0924097	0.513206	-0.114895	-0.0524581
270.56	0.50833	-0.76962	1.13745	-0.0305001	-0.189082	-1.71607	0.585412	0.065725	1.43029	0.052881	0.404345	0.365175	0.157333	0.502615	-0.017467	-0.539723	0.226807	-0.225162	0.0912029	0.489942	-0.139105	-0.0328822
271.04	0.472489	-0.763771	1.17299	-0.0898845	-0.18456	-1.79421	0.584369	0.0518307	1.42041	0.0122984	0.40935	0.354882	0.172346	0.520916	-0.0294691	-0.527217	0.243522	-0.189338	0.0895615	0.463047	-0.159347	-0.0201985
271.52	0.447236	-0.756406	1.20124	-0.156041	-0.19494	-1.89755	0.601092	0.039764	1.41397	-0.00819228	0.412013	0.361989	0.198066	0.5563	-0.0304905	-0.511861	0.247042	-0.161159	0.0870079	0.4387	-0.174364	-0.0177565
272	0.451436	-0.758419	1.22197	-0.210777	-0.219827	-2.01009	0.636376	0.0311851	1.42545	-0.00997835	0.41522	0.388611	0.228135	0.59693	-0.0238564	-0.494207	0.241577	-0.141402	0.0815265	0.421965	-0.183763	-0.026632
272.48	0.487723	-0.778045	1.24427	-0.238066	-0.257954	-2.11056	0.684669	0.0260289	1.45869	0.00215167	0.435449	0.425958	0.2577	0.629319	-0.016962	-0.473783	0.235382	-0.127487	0.0733669	0.41328	-0.190286	-0.0431781
272.96	0.544605	-0.815282	1.27518	-0.229359	-0.307469	-2.17991	0.741218	0.0235276	1.50838	0.0214688	0.489719	0.459467	0.285359	0.641941	-0.0135386	-0.454036	0.234371	-0.114852	0.0612635	0.409141	-0.200175	-0.0624035
273.44	0.60522	-0.859572	1.31756	-0.198637	-0.366292	-2.2133	0.793768	0.0212031	1.55569	0.041041	0.577553	0.477056	0.310888	0.635894	-0.0173783	-0.442665	0.239853	-0.0975123	0.0453226	0.401206	-0.216963	-0.0787349
273.92	0.658722	-0.902372	1.36795	-0.166788	-0.425494	-2.22101	0.836503	0.0194514	1.58505	0.0541883	0.682904	0.4767	0.331726	0.619329	-0.0248864	-0.443997	0.248296	-0.0740042	0.0264468	0.386561	-0.241919	-0.0887126
274.4	0.702935	-0.936891	1.41908	-0.154358	-0.474295	-2.22792	0.866003	0.0201058	1.58782	0.0536297	0.777187	0.467218	0.343392	0.60248	-0.0317925	-0.457308	0.256035	-0.0466473	0.00659883	0.36539	-0.271312	-0.093006
274.88	0.745135	-0.960889	1.46424	-0.158784	-0.504329	-2.25542	0.885713	0.0257813	1.56826	0.0398698	0.843091	0.457839	0.344218	0.590639	-0.0322928	-0.477126	0.263917	-0.0218301	-0.0102831	0.345645	-0.298659	-0.0909398
275.36	0.791847	-0.978706	1.50007	-0.160891	-0.513034	-2.31707	0.903194	0.0373565	1.53825	0.0171315	0.89042	0.454771	0.339257	0.582352	-0.0263392	-0.491336	0.276946	-0.00610222	-0.0212426	0.333313	-0.318883	-0.0825253
275.84	0.842245	-0.995254	1.52678	-0.144384	-0.509429	-2.40052	0.923406	0.0546191	1.51416	-0.00603476	0.941472	0.459049	0.339193	0.575986	-0.0158568	-0.491589	0.301218	-0.00311375	-0.0252406	0.331295	-0.330435	-0.0677673
276.32	0.886935	-1.0119	1.54449	-0.10136	-0.506888	-2.48107	0.945681	0.0734444	1.51124	-0.0218835	1.02567	0.466036	0.354638	0.572544	-0.0093975	-0.474822	0.338551	-0.0126819	-0.0245931	0.336967	-0.332403	-0.0475413
276.8	0.911928	-1.03082	1.55391	-0.0378327	-0.515546	-2.53061	0.963699	0.090767	1.53662	-0.0252724	1.1416	0.471621	0.387879	0.573766	-0.0110561	-0.443055	0.382695	-0.0312426	-0.0231351	0.344683	-0.327946	-0.0227919
277.28	0.907514	-1.05313	1.55343	0.0302741	-0.536765	-2.53366	0.968797	0.104624	1.57933	-0.0179805	1.2629	0.473782	0.431042	0.578989	-0.0220388	-0.402035	0.422478	-0.0569182	-0.0225451	0.348047	-0.320098	0.00181857
277.76	0.870657	-1.07422	1.54311	0.0889035	-0.567691	-2.4991	0.956746	0.113425	1.62931	-0.0073382	1.34893	0.47077	0.469233	0.583474	-0.0387173	-0.357604	0.447464	-0.0866827	-0.0233374	0.345089	-0.311753	0.0206652
278.24	0.813111	-1.09448	1.52252	0.142283	-0.603847	-2.45145	0.931352	0.117754	1.66681	-0.000844067	1.37701	0.46212	0.491583	0.579324	-0.0529426	-0.313513	0.454055	-0.119171	-0.0245592	0.339022	-0.303129	0.0291051
278.72	0.750577	-1.10913	1.49787	0.19215	-0.643675	-2.41425	0.898492	0.118929	1.68548	-0.00404513	1.35135	0.446153	0.495755	0.566818	-0.0619268	-0.273626	0.445576	-0.152219	-0.0236169	0.334056	-0.296777	0.024366
279.2	0.69619	-1.11638	1.47223	0.243737	-0.687599	-2.40323	0.866552	0.118117	1.68707	-0.0141049	1.30597	0.421805	0.489033	0.554772	-0.0603848	-0.238692	0.430789	-0.183842	-0.0218513	0.336818	-0.29738	0.00769436
279.68	0.659824	-1.11079	1.44989	0.281371	-0.733267	-2.409	0.836653	0.116523	1.68177	-0.0222082	1.26945	0.391842	0.48168	0.554833	-0.050243	-0.212308	0.418572	-0.211045	-0.0199386	0.348427	-0.307064	-0.0162494
280.16	0.641146	-1.09086	1.43553	0.293201	-0.774731	-2.41944	0.804043	0.114134	1.67654	-0.018678	1.2503	0.358501	0.479088	0.567565	-0.0335829	-0.198748	0.413031	-0.232076	-0.0198334	0.36602	-0.329021	-0.0416079
280.64	0.635997	-1.0598	1.4258	0.275063	-0.807502	-2.42327	0.763898	0.110425	1.67315	-0.00131372	1.23984	0.325078	0.481078	0.582282	-0.0123659	-0.193832	0.416684	-0.24724	-0.0219998	0.383932	-0.361508	-0.0657705
281.12	0.632964	-1.02218	1.41815	0.230744	-0.825492	-2.42044	0.712181	0.104713	1.66477	0.0267167	1.22657	0.294782	0.483685	0.584985	0.0100834	-0.1948	0.426723	-0.257336	-0.028038	0.398047	-0.398238	-0.0871118
281.6	0.624154	-0.990741	1.40917	0.176789	-0.830274	-2.41789	0.653442	0.0963398	1.64772	0.0544033	1.20536	0.27235	0.481852	0.56763	0.0308715	-0.193625	0.439763	-0.263537	-0.0377205	0.407963	-0.431096	-0.104659
282.08	0.604585	-0.971542	1.39799	0.124427	-0.825552	-2.42498	0.597854	0.0859985	1.62521	0.0745783	1.18123	0.265073	0.473766	0.536903	0.0463679	-0.187016	0.449354	-0.268519	-0.0518569	0.41853	-0.452635	-0.119963
282.56	0.573343	-0.972618	1.38433	0.0791792	-0.816218	-2.43847	0.555845	0.075978	1.61177	0.0824098	1.1661	0.276889	0.459676	0.503858	0.0533319	-0.175827	0.449348	-0.274492	-0.0692822	0.431903	-0.461614	-0.131314
283.04	0.532411	-0.987924	1.37243	0.033678	-0.807233	-2.44697	0.530405	0.0684563	1.62105	0.0780731	1.16584	0.306577	0.442482	0.466602	0.0485014	-0.165424	0.435648	-0.282727	-0.0905038	0.450226	-0.462248	-0.139344
283.52	0.495973	-1.01568	1.36444	-0.0184217	-0.802935	-2.43809	0.5181	0.0649732	1.6579	0.0636222	1.16991	0.350329	0.427208	0.410631	0.030652	-0.155118	0.410888	-0.294031	-0.11204	0.470862	-0.459894	-0.14119
284	0.484522	-1.04223	1.36123	-0.0702747	-0.805737	-2.40916	0.510471	0.0649982	1.71372	0.0409981	1.17198	0.399983	0.418298	0.317375	0.00247272	-0.143027	0.384931	-0.30856	-0.12976	0.487927	-0.457699	-0.137622
284.48	0.511012	-1.06076	1.3632	-0.108539	-0.816867	-2.37762	0.500593	0.0660408	1.76373	0.010398	1.16472	0.445164	0.418936	0.186118	-0.0311597	-0.127121	0.370691	-0.32517	-0.140814	0.497467	-0.453341	-0.129393
284.96	0.584192	-1.06913	1.369	-0.120142	-0.835149	-2.36151	0.484425	0.065535	1.78986	-0.0258943	1.15241	0.483411	0.429138	0.0427122	-0.0605115	-0.104009	0.375671	-0.341976	-0.144176	0.498608	-0.443917	-0.11726
285.44	0.693964	-1.06411	1.37759	-0.0949258	-0.854947	-2.37958	0.46179	0.063441	1.77926	-0.0631796	1.13687	0.513398	0.443164	-0.0707992	-0.0800808	-0.0746591	0.397429	-0.357747	-0.140457	0.497017	-0.429006	-0.103818
285.92	0.820234	-1.0592	1.38782	-0.0396745	-0.868678	-2.4309	0.437763	0.061325	1.7399	-0.0974243	1.1186	0.536269	0.45077	-0.123628	-0.0888096	-0.0481316	0.425484	-0.372333	-0.133248	0.497991	-0.411356	-0.0911174
286.4	0.942836	-1.05659	1.3983	0.0255331	-0.870472	-2.49768	0.413825	0.0619406	1.6888	-0.122634	1.09446	0.554741	0.44428	-0.117143	-0.092519	-0.0319582	0.448742	-0.385716	-0.124848	0.50557	-0.3968	-0.081552
286.88	1.05068	-1.06142	1.40474	0.0861514	-0.854265	-2.5557	0.391355	0.0669209	1.65083	-0.140039	1.06094	0.572356	0.421408	-0.0828957	-0.098005	-0.0309439	0.454531	-0.399975	-0.116327	0.519496	-0.387895	-0.0754282
287.36	1.14609	-1.06826	1.40602	0.136556	-0.820325	-2.58673	0.373892	0.0750109	1.64005	-0.14905	1.01922	0.593671	0.386191	-0.0581516	-0.111264	-0.0434124	0.457627	-0.41537	-0.107939	0.535417	-0.383568	-0.0731856
287.84	1.24031	-1.07336	1.40528	0.175567	-0.773571	-2.59451	0.363693	0.0823598	1.65807	-0.150548	0.96943	0.619741	0.346612	-0.0613111	-0.132173	-0.0662067	0.460833	-0.431312	-0.0997186	0.549014	-0.378548	-0.0734819
288.32	1.34165	-1.07101	1.40846	0.207568	-0.721398	-2.59199	0.368063	0.0869478	1.69458	-0.143398	0.912377	0.651004	0.310303	-0.082815	-0.154321	-0.089518	0.470025	-0.446467	-0.0906299	0.556281	-0.369476	-0.0743985
288.8	1.45196	-1.0648	1.42188	0.234146	-0.670346	-2.59731	0.391936	0.0887894	1.7354	-0.127593	0.844998	0.683596	0.280164	-0.0983458	-0.1694	-0.1092	0.483627	-0.456627	-0.0793669	0.556671	-0.353831	-0.0750898
289.28	1.56116	-1.05483	1.45083	0.249635	-0.628876	-2.609	0.431225	0.0908767	1.76854	-0.10543	0.766835	0.713248	0.255793	-0.0912339	-0.169622	-0.120847	0.496714	-0.459909	-0.0644912	0.553216	-0.329684	-0.0763536
289.76	1.65605	-1.04616	1.49298	0.243433	-0.601374	-2.61391	0.472907	0.0970575	1.78899	-0.0892118	0.677922	0.73603	0.238285	-0.0638286	-0.153181	-0.122343	0.505461	-0.455586	-0.0461505	0.549309	-0.297734	-0.0821827
290.24	1.72512	-1.03609	1.54204	0.21638	-0.589904	-2.59008	0.501235	0.107484	1.79335	-0.0896631	0.587676	0.751694	0.227381	-0.0325954	-0.124433	-0.115204	0.510526	-0.445516	-0.0248583	0.547669	-0.259299	-0.0928489
290.72	1.76851	-1.02858	1.59339	0.178024	-0.587525	-2.53018	0.507929	0.119954	1.7777	-0.114579	0.507226	0.759795	0.224131	-0.0134319	-0.0933871	-0.105701	0.514992	-0.433363	-0.00412283	0.547977	-0.212396	-0.106794
291.2	1.79765	-1.01856	1.64108	0.143497	-0.589952	-2.44103	0.497339	0.128218	1.73124	-0.161053	0.43963	0.758905	0.226422	-0.00968505	-0.0676642	-0.0981353	0.520528	-0.42343	0.0124549	0.547501	-0.162515	-0.12002
291.68	1.82587	-1.00587	1.68614	0.119092	-0.591921	-2.35039	0.482083	0.129565	1.6446	-0.219154	0.38945	0.74848	0.22727	-0.0129369	-0.0548586	-0.0953514	0.524798	-0.418337	0.021862	0.541817	-0.113719	-0.128826
292.16	1.8653	-0.987238	1.72804	0.108763	-0.592449	-2.28228	0.477229	0.12354	1.51908	-0.272025	0.342512	0.730003	0.220781	-0.0112578	-0.0553173	-0.0936568	0.524786	-0.418402	0.0229087	0.527994	-0.0669009	-0.134764
292.64	1.92042	-0.963707	1.76449	0.108552	-0.595371	-2.2509	0.487921	0.113575	1.3731	-0.308422	0.289841	0.704966	0.203836	0.00163437	-0.0628782	-0.0875752	0.517961	-0.421347	0.0162327	0.50495	-0.0215982	-0.142791
293.12	1.98994	-0.934105	1.79271	0.107127	-0.601795	-2.25845	0.507059	0.105095	1.23663	-0.324682	0.222665	0.682033	0.179272	0.0234702	-0.0677378	-0.0689679	0.506732	-0.424758	0.00348624	0.477501	0.0246624	-0.158692
293.6	2.07186	-0.897224	1.81331	0.0958796	-0.606974	-2.29357	0.523142	0.100993	1.1372	-0.326459	0.138313	0.664032	0.154037	0.0474816	-0.0604901	-0.0369052	0.494738	-0.425568	-0.0116974	0.452339	0.0693009	-0.184264
294.08	2.15427	-0.852605	1.83313	0.0765385	-0.606557	-2.33902	0.526012	0.103755	1.08124	-0.324957	0.0367447	0.653135	0.133271	0.0670027	-0.0361512	0.00455427	0.48586	-0.422018	-0.0254623	0.436616	0.108463	-0.216702
294.56	2.23001	-0.804464	1.85679	0.0492056	-0.59999	-2.37494	0.516225	0.11326	1.04958	-0.330136	-0.0804166	0.646686	0.11941	0.0759272	0.00300521	0.0469121	0.478558	-0.413961	-0.0338543	0.433182	0.133327	-0.249279
295.04	2.28481	-0.755844	1.89012	0.0155816	-0.590911	-2.38831	0.503665	0.126741	1.00796	-0.344135	-0.209704	0.640317	0.110826	0.0730693	0.0458012	0.0787477	0.470202	-0.405047	-0.0343932	0.440814	0.141303	-0.27641
295.52	2.30841	-0.711529	1.93066	-0.0206762	-0.588712	-2.37096	0.496518	0.139061	0.932564	-0.362836	-0.339034	0.636325	0.105896	0.0570697	0.0860796	0.097921	0.455483	-0.398122	-0.027663	0.452686	0.134663	-0.296261
296	2.29541	-0.674744	1.97449	-0.0580093	-0.59791	-2.32244	0.501418	0.144969	0.819182	-0.381797	-0.457884	0.635237	0.104078	0.0301658	0.115815	0.105798	0.434587	-0.397326	-0.0175847	0.462525	0.11989	-0.310407
296.48	2.25008	-0.648103	2.01555	-0.0909007	-0.613788	-2.26727	0.515673	0.13941	0.6871	-0.397029	-0.556023	0.640718	0.105696	-0.00375527	0.137566	0.107567	0.409965	-0.403901	-0.00787022	0.465763	0.106657	-0.32347
296.96	2.1906	-0.635036	2.05212	-0.110888	-0.625087	-2.23165	0.537146	0.123228	0.56291	-0.407376	-0.622371	0.650131	0.110915	-0.039664	0.15672	0.106233	0.387125	-0.416232	-0.00326445	0.46341	0.0995233	-0.337937
297.44	2.13399	-0.636955	2.08624	-0.118966	-0.624243	-2.23287	0.564265	0.101488	0.457121	-0.415574	-0.651728	0.661629	0.117597	-0.0726084	0.177524	0.105558	0.370958	-0.431222	-0.00595306	0.458732	0.0985175	-0.353233
297.92	2.09021	-0.653555	2.11781	-0.118664	-0.608708	-2.27189	0.595913	0.0813769	0.36768	-0.423325	-0.64214	0.672793	0.122159	-0.100785	0.20122	0.105672	0.364563	-0.443404	-0.0130482	0.455296	0.102187	-0.366915
298.4	2.05409	-0.679741	2.14774	-0.123163	-0.588882	-2.32037	0.635719	0.0680944	0.287407	-0.427935	-0.592884	0.684528	0.121858	-0.124722	0.221447	0.107974	0.36746	-0.451939	-0.0194563	0.455861	0.107975	-0.376033
298.88	2.01038	-0.705693	2.17518	-0.141356	-0.575711	-2.34226	0.682307	0.0625477	0.219948	-0.424224	-0.511302	0.700756	0.117602	-0.142464	0.227889	0.112289	0.375108	-0.4581	-0.0198234	0.457177	0.113879	-0.38164
299.36	1.94291	-0.728156	2.19567	-0.175564	-0.578281	-2.3129	0.726241	0.0618589	0.183974	-0.408762	-0.410001	0.723056	0.109471	-0.151509	0.212829	0.119013	0.384162	-0.46408	-0.0129617	0.456834	0.115943	-0.384774
299.84	1.84883	-0.742629	2.20556	-0.218481	-0.593296	-2.23937	0.759324	0.0618267	0.198505	-0.383867	-0.307191	0.748668	0.0987359	-0.148376	0.17445	0.12441	0.391088	-0.470663	0.00101058	0.450174	0.111342	-0.389037
300.32	1.73563	-0.751158	2.20331	-0.266889	-0.612327	-2.15302	0.776785	0.0617465	0.267263	-0.353141	-0.214061	0.768511	0.0861036	-0.131046	0.117378	0.126597	0.394247	-0.477601	0.0192584	0.436322	0.100261	-0.393091
300.8	1.61853	-0.765989	2.19123	-0.317724	-0.625739	-2.09744	0.78171	0.063976	0.368026	-0.322882	-0.144278	0.773988	0.0711364	-0.102745	0.0522808	0.126143	0.394402	-0.482924	0.0378674	0.416349	0.0860395	-0.394697
301.28	1.50887	-0.790424	2.1725	-0.369959	-0.630917	-2.09972	0.779212	0.0724242	0.466657	-0.293844	-0.0943385	0.762734	0.0543039	-0.0710723	-0.00635192	0.12475	0.391375	-0.484862	0.0546058	0.3945	0.0741754	-0.388
301.76	1.40649	-0.822694	2.15552	-0.421705	-0.630873	-2.16272	0.77448	0.0884874	0.535375	-0.263055	-0.0553192	0.737889	0.0377925	-0.043825	-0.0492826	0.12734	0.384491	-0.484787	0.0687821	0.37496	0.0698851	-0.370451
302.24	1.31293	-0.854797	2.14728	-0.460751	-0.630382	-2.26578	0.767461	0.110796	0.567808	-0.228163	-0.017116	0.70747	0.0234498	-0.0257976	-0.0719418	0.137449	0.373272	-0.485385	0.0809951	0.357723	0.0765315	-0.343975
302.72	1.22549	-0.8725	2.15158	-0.475882	-0.63276	-2.37785	0.753655	0.134086	0.577427	-0.18902	0.0268636	0.679628	0.0115784	-0.0180369	-0.0813223	0.154208	0.358448	-0.487257	0.0897058	0.341695	0.0947099	-0.316022
303.2	1.15288	-0.869208	2.16808	-0.460439	-0.637196	-2.47011	0.727403	0.153724	0.581811	-0.151963	0.0751625	0.658945	0.000806183	-0.019781	-0.0848445	0.174307	0.342331	-0.490557	0.0932047	0.324326	0.124654	-0.295439
303.68	1.09408	-0.845735	2.18794	-0.420283	-0.644383	-2.52469	0.68797	0.168651	0.588488	-0.1211	0.12264	0.644881	-0.0111641	-0.0294392	-0.0919759	0.189385	0.329445	-0.492883	0.0917972	0.304145	0.166295	-0.286415
304.16	1.04478	-0.814032	2.20231	-0.367936	-0.655333	-2.53695	0.641747	0.178896	0.585265	-0.101064	0.166592	0.636295	-0.0249928	-0.0469227	-0.105523	0.196382	0.322925	-0.491581	0.0872246	0.283594	0.216648	-0.286259
304.64	0.988917	-0.786736	2.2082	-0.315844	-0.669794	-2.51546	0.595935	0.187251	0.55464	-0.088634	0.206432	0.629604	-0.0377816	-0.0693221	-0.122153	0.194173	0.32253	-0.486536	0.0820607	0.266167	0.273659	-0.286634
305.12	0.910967	-0.769714	2.20522	-0.267816	-0.689431	-2.47263	0.559888	0.193674	0.489618	-0.0830718	0.245948	0.620333	-0.0453579	-0.093325	-0.135258	0.18854	0.326537	-0.479006	0.0799471	0.254781	0.330516	-0.279318
305.6	0.808387	-0.757169	2.1984	-0.219782	-0.708789	-2.4251	0.536694	0.196589	0.396511	-0.0810473	0.291414	0.604874	-0.0467656	-0.115149	-0.140959	0.183754	0.331497	-0.471704	0.0823351	0.249074	0.38104	-0.261573
306.08	0.701105	-0.741297	2.19254	-0.171902	-0.722153	-2.38752	0.524801	0.194239	0.296206	-0.0808337	0.347927	0.584485	-0.0435191	-0.130372	-0.141306	0.182853	0.337589	-0.463774	0.0885501	0.245078	0.421222	-0.237143
306.56	0.619861	-0.717119	2.18334	-0.121414	-0.722976	-2.36597	0.513877	0.185926	0.208906	-0.0798185	0.406184	0.566205	-0.0399157	-0.137987	-0.140038	0.191372	0.345393	-0.456686	0.0974199	0.23918	0.450308	-0.212907
307.04	0.59134	-0.686411	2.16627	-0.0806141	-0.710704	-2.36048	0.495596	0.174696	0.146805	-0.0733398	0.457882	0.552941	-0.0381004	-0.142128	-0.138432	0.209478	0.357907	-0.451826	0.107465	0.231494	0.472298	-0.194203
307.52	0.612401	-0.658274	2.14127	-0.0501755	-0.688857	-2.37068	0.46244	0.166421	0.112252	-0.0568467	0.494944	0.54652	-0.0384795	-0.14684	-0.131466	0.232465	0.374884	-0.453076	0.119607	0.224502	0.491282	-0.182674
308	0.656574	-0.641606	2.11446	-0.0175025	-0.665076	-2.39202	0.414325	0.165565	0.102319	-0.0290438	0.513534	0.540434	-0.0373991	-0.154125	-0.112919	0.258741	0.393516	-0.461682	0.135689	0.221716	0.507729	-0.176245
308.48	0.685987	-0.638785	2.09421	0.0305965	-0.64433	-2.41643	0.356048	0.173656	0.114139	0.00394843	0.521613	0.524979	-0.0303082	-0.164692	-0.0758982	0.283453	0.408265	-0.477079	0.155565	0.224178	0.520284	-0.173198
308.96	0.677444	-0.64353	2.08879	0.101567	-0.628327	-2.4454	0.297258	0.187733	0.144782	0.0350996	0.518648	0.493256	-0.016076	-0.17696	-0.0241726	0.3047	0.414894	-0.495031	0.177925	0.229088	0.526806	-0.172671
309.44	0.63279	-0.64591	2.10026	0.186444	-0.615898	-2.47127	0.245676	0.200842	0.188154	0.0600016	0.509181	0.450555	0.00380674	-0.189154	0.0305939	0.32319	0.414377	-0.507507	0.198049	0.230021	0.531828	-0.173666
309.92	0.574289	-0.637176	2.11933	0.265775	-0.603715	-2.47949	0.202542	0.206739	0.235431	0.0830047	0.491744	0.407191	0.0255005	-0.201979	0.0729155	0.340753	0.410938	-0.508733	0.213848	0.221198	0.537463	-0.175685
310.4	0.523384	-0.616854	2.14046	0.321715	-0.594139	-2.46493	0.164477	0.203439	0.277588	0.10915	0.465122	0.373881	0.0460763	-0.215857	0.094831	0.356462	0.411245	-0.498569	0.223088	0.20198	0.545853	-0.175078
310.88	0.482202	-0.587629	2.16139	0.35277	-0.589423	-2.41939	0.128101	0.193422	0.311061	0.141809	0.435149	0.351505	0.0660571	-0.230986	0.0993941	0.367734	0.417507	-0.480243	0.228618	0.176137	0.555799	-0.167979
311.36	0.440734	-0.557023	2.18527	0.375172	-0.596123	-2.34266	0.0906692	0.182244	0.339839	0.177174	0.420856	0.33162	0.0866677	-0.243585	0.0976251	0.370128	0.428578	-0.459316	0.233522	0.150263	0.564004	-0.153232
311.84	0.381801	-0.526248	2.2128	0.410823	-0.613841	-2.24457	0.056873	0.174347	0.367853	0.208331	0.445606	0.301462	0.108897	-0.249024	0.101385	0.361187	0.44028	-0.439016	0.240894	0.129605	0.565796	-0.132289
312.32	0.297666	-0.498537	2.24496	0.472263	-0.637952	-2.14418	0.0295939	0.171601	0.399232	0.230093	0.51546	0.255601	0.131095	-0.248322	0.118884	0.34203	0.447667	-0.419412	0.252349	0.115386	0.561709	-0.110129
312.8	0.189535	-0.473757	2.27572	0.554098	-0.659087	-2.05687	0.0111873	0.171535	0.433105	0.245491	0.616421	0.201387	0.149182	-0.246882	0.148172	0.316423	0.448121	-0.400391	0.264619	0.107763	0.549752	-0.0943334
313.28	0.0729828	-0.452989	2.30171	0.640618	-0.667828	-1.991	-0.00015134	0.170276	0.462098	0.262948	0.709165	0.156599	0.15938	-0.252405	0.181899	0.287849	0.441824	-0.382498	0.275161	0.104877	0.531378	-0.0884772
313.76	-0.0372421	-0.438957	2.32177	0.717681	-0.661402	-1.94801	-0.00821579	0.164829	0.481917	0.289765	0.765583	0.138609	0.160191	-0.266959	0.208172	0.259501	0.429823	-0.364374	0.280139	0.108322	0.507721	-0.0943007
314.24	-0.130594	-0.434686	2.34141	0.775084	-0.644551	-1.92414	-0.0136709	0.156876	0.495145	0.32587	0.772358	0.153982	0.153872	-0.285533	0.221238	0.235719	0.413202	-0.34624	0.279483	0.119763	0.478656	-0.108248
314.72	-0.205593	-0.438958	2.36203	0.806794	-0.62958	-1.91711	-0.0146957	0.150504	0.510985	0.361907	0.743385	0.191943	0.145821	-0.29536	0.218569	0.216233	0.393933	-0.326845	0.277615	0.14071	0.446015	-0.124521
315.2	-0.253929	-0.447112	2.38391	0.813459	-0.624899	-1.92779	-0.00711773	0.149974	0.536644	0.387138	0.707163	0.230891	0.137941	-0.287177	0.202404	0.200919	0.377087	-0.302478	0.280685	0.16964	0.411667	-0.137541
315.68	-0.283826	-0.453422	2.39832	0.799558	-0.63583	-1.95277	0.00951161	0.15809	0.573133	0.398049	0.691208	0.248328	0.131064	-0.257638	0.181838	0.188917	0.369505	-0.275254	0.295756	0.200909	0.380371	-0.13436
316.16	-0.293521	-0.457817	2.39881	0.775152	-0.653464	-1.98471	0.0331948	0.173261	0.613742	0.399045	0.709137	0.231762	0.125041	-0.214581	0.161804	0.177884	0.377696	-0.248379	0.325025	0.227617	0.352568	-0.135326
316.64	-0.29642	-0.460104	2.37961	0.753813	-0.665929	-2.00896	0.0534088	0.1921	0.645243	0.399834	0.74644	0.187362	0.118322	-0.171596	0.14851	0.165944	0.40171	-0.2292	0.366014	0.24396	0.330771	-0.13177
317.12	-0.301012	-0.469454	2.3405	0.749548	-0.664034	-2.01178	0.065286	0.210923	0.661169	0.404889	0.787602	0.131994	0.109991	-0.138008	0.13967	0.154059	0.433479	-0.22248	0.410264	0.248978	0.311195	-0.128888
317.6	-0.31923	-0.491042	2.28458	0.764646	-0.648777	-1.99409	0.0642549	0.229112	0.661318	0.412793	0.810011	0.0847316	0.100861	-0.115724	0.131258	0.143973	0.457921	-0.2308	0.449526	0.243895	0.291722	-0.129553
318.08	-0.353102	-0.527714	2.21612	0.787523	-0.625681	-1.9588	0.0526621	0.246044	0.653922	0.417268	0.802351	0.0575393	0.0907818	-0.0971466	0.11568	0.14037	0.462792	-0.249981	0.479875	0.232891	0.273974	-0.137292
318.56	-0.402328	-0.576082	2.13892	0.801789	-0.604584	-1.93057	0.0344339	0.261462	0.647582	0.413604	0.761618	0.0459313	0.0806037	-0.0727198	0.0865889	0.14295	0.446232	-0.272967	0.501857	0.219948	0.260637	-0.150848
319.04	-0.461445	-0.626731	2.06191	0.794909	-0.5903	-1.91717	0.0131993	0.273277	0.653172	0.404561	0.696871	0.038976	0.0731297	-0.0382534	0.0486633	0.150767	0.416751	-0.292212	0.519463	0.209005	0.254992	-0.166955
319.52	-0.524461	-0.667259	1.99088	0.77055	-0.580844	-1.92382	-0.00822501	0.279607	0.673519	0.397955	0.618587	0.0260165	0.0728291	0.00112631	0.00903863	0.163646	0.389248	-0.302206	0.536653	0.204026	0.252952	-0.182756
320	-0.582766	-0.69293	1.92978	0.741702	-0.570574	-1.94385	-0.0275217	0.280517	0.700365	0.401457	0.542361	0.00452958	0.0820706	0.0382579	-0.0215947	0.178196	0.375719	-0.300857	0.554478	0.208351	0.249154	-0.192884
320.48	-0.63386	-0.702947	1.8803	0.7232	-0.5573	-1.97457	-0.0465999	0.280929	0.722028	0.417545	0.479328	-0.0178974	0.103024	0.0690345	-0.0359679	0.197782	0.380414	-0.288948	0.572841	0.221757	0.236702	-0.195713
320.96	-0.679428	-0.706099	1.84036	0.717407	-0.543041	-2.01579	-0.0661275	0.287249	0.723714	0.4427	0.4286	-0.0322894	0.130352	0.093042	-0.0341213	0.220021	0.398845	-0.268517	0.588948	0.241188	0.212343	-0.189966
321.44	-0.719813	-0.710141	1.80326	0.713688	-0.531275	-2.07405	-0.0881332	0.30365	0.697592	0.467346	0.381637	-0.0319454	0.156188	0.114466	-0.024815	0.24412	0.42341	-0.241929	0.600959	0.260776	0.17909	-0.177625
321.92	-0.752923	-0.717786	1.76354	0.700987	-0.527765	-2.14603	-0.111579	0.329368	0.645213	0.482857	0.330787	-0.0178203	0.174206	0.138836	-0.0183167	0.266473	0.447076	-0.211668	0.607312	0.274769	0.142737	-0.164274
322.4	-0.773634	-0.726095	1.72197	0.677772	-0.533161	-2.21704	-0.136056	0.357801	0.579467	0.486307	0.273896	0.00622916	0.180568	0.16822	-0.0253255	0.281608	0.465921	-0.178845	0.608079	0.282405	0.109048	-0.1542
322.88	-0.774942	-0.730295	1.68168	0.65718	-0.54498	-2.26437	-0.157574	0.380058	0.5194	0.477221	0.216542	0.0373002	0.179891	0.200036	-0.0456915	0.28761	0.477849	-0.146896	0.602834	0.285036	0.0789951	-0.152591
323.36	-0.762441	-0.726986	1.64379	0.656173	-0.562519	-2.27871	-0.173526	0.38963	0.475611	0.458976	0.171719	0.0714051	0.178895	0.230016	-0.0731872	0.282666	0.479463	-0.117546	0.593135	0.287971	0.0527968	-0.160949
323.84	-0.744801	-0.718984	1.60701	0.688136	-0.586824	-2.27164	-0.184133	0.386516	0.450401	0.43645	0.153295	0.102163	0.184159	0.255207	-0.0972302	0.26745	0.468777	-0.0949268	0.582129	0.295036	0.0289951	-0.17532
324.32	-0.739729	-0.71147	1.56521	0.748818	-0.618267	-2.26564	-0.191012	0.375542	0.434009	0.414636	0.162094	0.123366	0.197918	0.275108	-0.108422	0.239651	0.446598	-0.0809325	0.572991	0.306069	0.00964736	-0.189867
324.8	-0.760139	-0.706202	1.50963	0.821608	-0.651707	-2.28649	-0.197794	0.362176	0.4218	0.398	0.187946	0.128522	0.215471	0.289642	-0.105043	0.20279	0.417989	-0.0766	0.569471	0.319512	-0.00451545	-0.19896
325.28	-0.800834	-0.705159	1.43798	0.892968	-0.684278	-2.34061	-0.206309	0.351188	0.416691	0.388518	0.216177	0.118491	0.231036	0.297145	-0.0943667	0.156747	0.389429	-0.0812186	0.573156	0.331441	-0.0105371	-0.200593
325.76	-0.849276	-0.705915	1.35398	0.945754	-0.709149	-2.41924	-0.219174	0.34267	0.429543	0.385528	0.234715	0.102988	0.238454	0.294633	-0.0812107	0.106735	0.366016	-0.091987	0.580191	0.340979	-0.0111855	-0.195963
326.24	-0.882604	-0.707441	1.2629	0.977382	-0.725125	-2.50469	-0.230918	0.337028	0.468812	0.38525	0.241202	0.093591	0.236911	0.279333	-0.0723913	0.059497	0.347079	-0.104775	0.583244	0.348459	-0.00830397	-0.1876
326.72	-0.888569	-0.715199	1.17112	0.983514	-0.73404	-2.59062	-0.240833	0.332184	0.534032	0.383501	0.246357	0.0990523	0.229723	0.252982	-0.0613686	0.0220497	0.330547	-0.114727	0.57684	0.356084	-0.0054755	-0.176263
327.2	-0.873591	-0.731692	1.08221	0.974016	-0.7371	-2.67957	-0.249655	0.327341	0.607761	0.378692	0.253179	0.11464	0.223771	0.221575	-0.0440667	-0.000534	0.31436	-0.118966	0.557741	0.365773	-0.00127948	-0.163336
327.68	-0.840189	-0.757644	0.994154	0.958193	-0.733717	-2.7734	-0.257575	0.322465	0.673122	0.372483	0.262406	0.131996	0.224918	0.192405	-0.0187807	-0.0099205	0.30145	-0.116241	0.530153	0.377031	0.00533416	-0.149172
328.16	-0.80446	-0.789606	0.907356	0.94615	-0.719789	-2.86217	-0.264409	0.317507	0.715719	0.366773	0.265371	0.141899	0.234413	0.175489	0.0112686	-0.0116011	0.297828	-0.107228	0.503583	0.389815	0.0163992	-0.135612
328.64	-0.765762	-0.818558	0.824626	0.95027	-0.691927	-2.91976	-0.263941	0.312762	0.73397	0.361839	0.258962	0.146268	0.24884	0.175495	0.0378286	-0.0114303	0.306925	-0.096739	0.48645	0.40482	0.0336884	-0.127557
329.12	-0.723841	-0.839815	0.750132	0.976932	-0.651283	-2.92238	-0.249411	0.308259	0.732362	0.355062	0.245288	0.156221	0.263803	0.192556	0.0576284	-0.013639	0.327615	-0.0882009	0.481012	0.421883	0.0557449	-0.128103
329.6	-0.671778	-0.855307	0.687035	1.02306	-0.60563	-2.87076	-0.215004	0.302851	0.719789	0.341011	0.231942	0.182316	0.274774	0.21992	0.0676459	-0.0206222	0.351277	-0.0853414	0.482849	0.439578	0.080105	-0.138116
330.08	-0.609991	-0.872793	0.63974	1.07344	-0.567035	-2.78799	-0.164537	0.295715	0.700447	0.318889	0.232374	0.224861	0.28017	0.247594	0.0754776	-0.0299602	0.368527	-0.0867209	0.482452	0.456146	0.103758	-0.154222
330.56	-0.547309	-0.901142	0.610529	1.11644	-0.541671	-2.71476	-0.111538	0.285573	0.680109	0.292395	0.246184	0.27185	0.283183	0.266142	0.0835163	-0.0387761	0.37244	-0.088747	0.472949	0.467524	0.122089	-0.169786
331.04	-0.49223	-0.939455	0.601736	1.14792	-0.528239	-2.67689	-0.0692531	0.273826	0.664879	0.268617	0.26017	0.303788	0.28835	0.267272	0.0945223	-0.043319	0.362544	-0.0893843	0.453193	0.470206	0.132821	-0.179268
331.52	-0.453201	-0.980764	0.614007	1.16179	-0.523415	-2.67029	-0.0459138	0.263217	0.661332	0.255465	0.256471	0.307531	0.299863	0.249884	0.105462	-0.0427479	0.343447	-0.0876594	0.429419	0.463288	0.134505	-0.180886
332	-0.434715	-1.01853	0.641229	1.16191	-0.517772	-2.66556	-0.0405475	0.255786	0.670365	0.248533	0.219085	0.283376	0.316801	0.216834	0.113082	-0.0385635	0.32089	-0.0861494	0.4093	0.449566	0.13019	-0.176389
332.48	-0.428799	-1.04597	0.674145	1.1465	-0.505973	-2.6361	-0.0454941	0.250582	0.690186	0.239968	0.153906	0.244209	0.333696	0.176845	0.116835	-0.0347555	0.298549	-0.0892523	0.397075	0.433251	0.126288	-0.16833
332.96	-0.424171	-1.06735	0.698504	1.11651	-0.485752	-2.57623	-0.0510563	0.243837	0.714225	0.219179	0.075285	0.207345	0.344079	0.138346	0.120935	-0.0345794	0.279156	-0.0966476	0.391056	0.416983	0.126746	-0.160653
333.44	-0.39958	-1.08578	0.704383	1.06984	-0.459281	-2.50779	-0.0603952	0.2309	0.738644	0.182557	0.00937164	0.184485	0.342536	0.105809	0.127122	-0.0391091	0.263889	-0.105016	0.385165	0.401641	0.135178	-0.155662
333.92	-0.351182	-1.10331	0.689246	1.01051	-0.432488	-2.45263	-0.0737272	0.21008	0.762389	0.135704	-0.0340246	0.176389	0.326862	0.079118	0.13292	-0.0495423	0.252954	-0.109913	0.372499	0.386132	0.14894	-0.152796
334.4	-0.272685	-1.11762	0.663062	0.945964	-0.411318	-2.41572	-0.0899971	0.185451	0.784496	0.0876947	-0.0628058	0.172795	0.30051	0.0537133	0.135494	-0.0641611	0.245285	-0.107024	0.349674	0.368903	0.161265	-0.152091
334.88	-0.176942	-1.1243	0.636169	0.885562	-0.401323	-2.37436	-0.104217	0.164246	0.798089	0.0457754	-0.0893427	0.163114	0.268463	0.0245193	0.130958	-0.0836342	0.237903	-0.0983207	0.319273	0.351673	0.167538	-0.152749
335.36	-0.0856899	-1.12665	0.617619	0.831067	-0.402691	-2.29651	-0.109103	0.152766	0.795563	0.0104993	-0.128607	0.142467	0.234475	-0.00802593	0.119266	-0.100936	0.228081	-0.0890023	0.286773	0.337578	0.169211	-0.154923
335.84	-0.0228513	-1.12961	0.609732	0.78087	-0.413174	-2.15533	-0.101395	0.151711	0.77389	-0.0221832	-0.179487	0.112946	0.200834	-0.0404656	0.110669	-0.109471	0.213664	-0.083528	0.255966	0.329135	0.169311	-0.158634
336.32	-0.00150516	-1.14283	0.607537	0.739184	-0.427684	-1.96369	-0.0870312	0.155302	0.737174	-0.0564758	-0.231093	0.0846799	0.167645	-0.0645172	0.110857	-0.103258	0.19634	-0.0848803	0.23089	0.326374	0.169132	-0.163038
336.8	-0.0155259	-1.16662	0.605977	0.709923	-0.441981	-1.75347	-0.0759366	0.154761	0.703835	-0.0938231	-0.26724	0.0639231	0.136159	-0.0762912	0.123247	-0.0829601	0.182696	-0.0933047	0.212708	0.32678	0.16745	-0.167612
337.28	-0.0429573	-1.19347	0.602824	0.705522	-0.455336	-1.5615	-0.0733348	0.144646	0.690067	-0.133177	-0.2838	0.0545161	0.109125	-0.0756681	0.141733	-0.0568006	0.178503	-0.107213	0.202811	0.325285	0.163145	-0.172316
337.76	-0.0535584	-1.21161	0.595485	0.73295	-0.467429	-1.41027	-0.0742921	0.125225	0.702517	-0.171892	-0.286988	0.0530059	0.0907426	-0.0700644	0.1583	-0.0363242	0.187366	-0.124898	0.200483	0.321267	0.155715	-0.176675
338.24	-0.034278	-1.21741	0.583978	0.790894	-0.479898	-1.29787	-0.0700752	0.102923	0.73585	-0.205995	-0.287221	0.0509612	0.0850471	-0.0672974	0.170906	-0.0269591	0.207174	-0.144288	0.205223	0.317778	0.147242	-0.179828
338.72	0.0140618	-1.21355	0.566139	0.867826	-0.493685	-1.20984	-0.0553454	0.0843866	0.778255	-0.23041	-0.296178	0.0429087	0.0923344	-0.0686469	0.177788	-0.0220197	0.23266	-0.161715	0.214119	0.318574	0.144082	-0.180329
339.2	0.0776543	-1.21043	0.536484	0.944489	-0.507564	-1.13712	-0.030132	0.0738946	0.821214	-0.240387	-0.30869	0.0289522	0.106407	-0.0691193	0.18718	-0.00674703	0.25867	-0.173828	0.224175	0.325201	0.150348	-0.178169
339.68	0.129483	-1.21923	0.493949	1.02043	-0.520632	-1.07894	-0.00641067	0.0715083	0.855457	-0.230243	-0.314318	0.0144219	0.118315	-0.0639121	0.199629	0.0333426	0.281523	-0.17604	0.232083	0.335286	0.167912	-0.172295
340.16	0.15496	-1.23887	0.441603	1.09326	-0.532055	-1.04163	0.00496614	0.0741554	0.884743	-0.199239	-0.305748	0.0101992	0.118919	-0.0511682	0.208203	0.0953505	0.300409	-0.168554	0.23727	0.344125	0.190958	-0.162747
340.64	0.146184	-1.26002	0.383947	1.16969	-0.544455	-1.02772	0.000404437	0.078438	0.910256	-0.15513	-0.285016	0.0221866	0.106054	-0.0368659	0.200959	0.167977	0.316711	-0.154129	0.239163	0.349428	0.214442	-0.149421
341.12	0.110824	-1.26923	0.323377	1.25161	-0.558691	-1.03065	-0.0139654	0.0837802	0.933312	-0.108645	-0.264063	0.0518682	0.0838285	-0.0292781	0.173683	0.227096	0.330333	-0.137899	0.23745	0.349975	0.237206	-0.132231
341.6	0.0694876	-1.26069	0.260249	1.33151	-0.578143	-1.03501	-0.0246579	0.0888837	0.950187	-0.0697207	-0.25781	0.0917241	0.0630627	-0.0325459	0.131415	0.259819	0.339503	-0.127105	0.23126	0.347132	0.262609	-0.111431
342.08	0.0493417	-1.24057	0.191035	1.39577	-0.598987	-1.02056	-0.022654	0.0925331	0.964617	-0.0411174	-0.27363	0.128177	0.0509259	-0.0443253	0.0856857	0.265306	0.343034	-0.124459	0.220364	0.343641	0.293185	-0.0890615
342.56	0.0692568	-1.22328	0.114759	1.43325	-0.616357	-0.977956	-0.00866195	0.0926109	0.982086	-0.0185049	-0.306254	0.149788	0.0530916	-0.0570128	0.0492656	0.257138	0.34218	-0.130534	0.207737	0.33873	0.330274	-0.0665516
343.04	0.13132	-1.21977	0.0402175	1.44842	-0.624662	-0.915353	0.00930668	0.0882052	1.00804	0.00149892	-0.338609	0.148145	0.0661318	-0.0674404	0.0245215	0.250878	0.340548	-0.141265	0.195526	0.333785	0.369183	-0.0473796
343.52	0.223585	-1.23439	-0.02693	1.45057	-0.619826	-0.852778	0.0191924	0.0815076	1.03949	0.019389	-0.35395	0.128577	0.0833324	-0.0783188	0.00657037	0.254455	0.343043	-0.151659	0.188563	0.330496	0.402146	-0.0339148
344	0.313149	-1.25743	-0.0743103	1.45638	-0.602685	-0.811141	0.0124831	0.0764819	1.06717	0.0314597	-0.356086	0.0993623	0.0987512	-0.0973238	-0.0126827	0.263422	0.351717	-0.157148	0.187852	0.330746	0.422533	-0.0263203
344.48	0.36937	-1.27532	-0.101028	1.46994	-0.577821	-0.808682	-0.00945748	0.0779378	1.08041	0.0312151	-0.358181	0.0716526	0.110889	-0.126951	-0.0338529	0.269021	0.365225	-0.157947	0.192285	0.335159	0.426104	-0.0219236
344.96	0.376727	-1.27729	-0.113291	1.49086	-0.555782	-0.844777	-0.0393105	0.0861051	1.07578	0.0189912	-0.377817	0.0495728	0.120841	-0.163211	-0.051509	0.267377	0.378927	-0.157769	0.198189	0.339942	0.417276	-0.0177142
345.44	0.340081	-1.26411	-0.119922	1.50958	-0.543747	-0.900174	-0.0649766	0.0976944	1.06263	0.00277772	-0.428474	0.0326771	0.129334	-0.193976	-0.0573784	0.259867	0.387946	-0.163533	0.202543	0.340903	0.404773	-0.0107974
345.92	0.284879	-1.24798	-0.124624	1.52468	-0.544924	-0.955017	-0.0802633	0.107373	1.05677	-0.0077168	-0.500043	0.0167032	0.13495	-0.209204	-0.0498275	0.253323	0.389829	-0.178945	0.206866	0.33096	0.394394	-0.00186139
346.4	0.237911	-1.2397	-0.129303	1.53487	-0.555544	-0.991109	-0.0841399	0.111663	1.06778	-0.00786118	-0.568523	0.00027767	0.133753	-0.207006	-0.0358441	0.252685	0.386631	-0.205283	0.211603	0.312427	0.392878	0.00770094
346.88	0.215721	-1.24534	-0.134295	1.54637	-0.570352	-0.998669	-0.0814398	0.111948	1.0951	-0.00291238	-0.606145	-0.0134823	0.124463	-0.195185	-0.0269068	0.257458	0.381876	-0.235928	0.219446	0.289217	0.399762	0.0146375
347.36	0.21776	-1.26627	-0.139887	1.56203	-0.580487	-0.980513	-0.0773368	0.111366	1.12666	-0.00336562	-0.598356	-0.0165535	0.109329	-0.185095	-0.0290075	0.2617	0.378995	-0.263583	0.229387	0.26881	0.413811	0.0194967
347.84	0.225849	-1.29285	-0.151647	1.57966	-0.584427	-0.940787	-0.0707712	0.112697	1.14878	-0.0177754	-0.550989	-0.00251834	0.095272	-0.182395	-0.0451262	0.262784	0.379835	-0.283418	0.241	0.255302	0.430125	0.0241552
348.32	0.220646	-1.31604	-0.174397	1.59821	-0.580709	-0.884901	-0.0569532	0.116115	1.1554	-0.0444805	-0.483146	0.0264839	0.0885441	-0.187569	-0.0665085	0.260115	0.383804	-0.296248	0.253764	0.24909	0.446011	0.0326702
348.8	0.193313	-1.33525	-0.209522	1.61614	-0.57251	-0.820745	-0.0313432	0.119131	1.15077	-0.0741012	-0.416946	0.0623437	0.091177	-0.196197	-0.0795603	0.260104	0.390875	-0.306222	0.270821	0.246214	0.458259	0.0480532
349.28	0.142294	-1.35279	-0.252146	1.63303	-0.561264	-0.762739	0.00640293	0.119846	1.14699	-0.096457	-0.363715	0.0921443	0.100446	-0.202941	-0.0756034	0.271236	0.402708	-0.317307	0.294776	0.242892	0.464643	0.0705741
349.76	0.0753875	-1.37522	-0.294445	1.65013	-0.549398	-0.720803	0.0462268	0.117517	1.14949	-0.105908	-0.328394	0.106063	0.112824	-0.20746	-0.0529522	0.298446	0.419858	-0.32703	0.32777	0.23723	0.461341	0.09762
350.24	-0.0052139	-1.40705	-0.329094	1.66391	-0.539118	-0.697004	0.0749543	0.114069	1.16197	-0.105495	-0.309483	0.103521	0.125774	-0.20905	-0.0206991	0.344003	0.440205	-0.329943	0.365172	0.231879	0.447267	0.127244
350.72	-0.0946306	-1.44375	-0.35437	1.67075	-0.529826	-0.688618	0.0852434	0.112613	1.17662	-0.10423	-0.300218	0.0928487	0.140577	-0.206584	0.00851907	0.400526	0.457766	-0.320351	0.400334	0.227612	0.42871	0.156433
351.2	-0.194224	-1.47579	-0.372029	1.66395	-0.523403	-0.676678	0.077329	0.114931	1.18757	-0.110105	-0.301714	0.0862389	0.160008	-0.200226	0.0225292	0.45487	0.467801	-0.298045	0.427777	0.226748	0.410379	0.185265
351.68	-0.296924	-1.4945	-0.384308	1.64732	-0.522143	-0.657663	0.0596957	0.120453	1.19148	-0.124903	-0.311321	0.0905652	0.184384	-0.193517	0.015285	0.492387	0.465751	-0.271498	0.444731	0.229031	0.398868	0.214423
352.16	-0.391941	-1.49547	-0.387948	1.6262	-0.527306	-0.633329	0.0401597	0.126191	1.18877	-0.146207	-0.330924	0.10697	0.212129	-0.194489	-0.0107894	0.50162	0.453768	-0.252905	0.452826	0.233564	0.397194	0.242851
352.64	-0.467874	-1.48302	-0.379009	1.60959	-0.541085	-0.608412	0.023477	0.129498	1.18127	-0.169587	-0.364956	0.12531	0.236654	-0.212264	-0.0479846	0.485526	0.439563	-0.250868	0.457934	0.240453	0.405701	0.270013
353.12	-0.518193	-1.4663	-0.355303	1.61025	-0.566712	-0.586102	0.00800217	0.127728	1.17259	-0.191996	-0.411024	0.135829	0.252658	-0.251919	-0.0861752	0.453803	0.432347	-0.266178	0.4654	0.251035	0.421116	0.295141
353.6	-0.54933	-1.45357	-0.324329	1.63224	-0.603482	-0.558385	-0.00971288	0.121812	1.16292	-0.213518	-0.46802	0.137065	0.25851	-0.307819	-0.11982	0.420862	0.437517	-0.291565	0.477829	0.266686	0.440688	0.317465
354.08	-0.57489	-1.44687	-0.295844	1.67216	-0.646519	-0.514366	-0.0299665	0.113521	1.15604	-0.233071	-0.527255	0.13725	0.256413	-0.370019	-0.145141	0.399629	0.453665	-0.315984	0.492898	0.286902	0.461123	0.334244
354.56	-0.601998	-1.44095	-0.280471	1.72117	-0.686596	-0.456476	-0.0528542	0.107125	1.1508	-0.246095	-0.569395	0.148235	0.251025	-0.423705	-0.159086	0.392951	0.473689	-0.332094	0.507302	0.308518	0.482689	0.343939
355.04	-0.633899	-1.43038	-0.28424	1.76551	-0.718484	-0.403156	-0.0737973	0.104703	1.15251	-0.249181	-0.581051	0.175248	0.246202	-0.464181	-0.160407	0.396248	0.489964	-0.338666	0.517616	0.329637	0.504548	0.34475
355.52	-0.666374	-1.41627	-0.303357	1.79735	-0.73922	-0.372696	-0.0917609	0.108461	1.15833	-0.239771	-0.561566	0.210848	0.24423	-0.493289	-0.146827	0.400527	0.498271	-0.339756	0.522946	0.347312	0.524262	0.338007
356	-0.695243	-1.40353	-0.323647	1.80811	-0.754573	-0.382635	-0.104532	0.116858	1.16485	-0.219545	-0.525333	0.239934	0.244814	-0.520631	-0.122664	0.399771	0.497388	-0.340617	0.524493	0.359959	0.542881	0.328691
356.48	-0.722686	-1.39997	-0.33525	1.79976	-0.773708	-0.415095	-0.114632	0.12685	1.16941	-0.189728	-0.496783	0.246142	0.24528	-0.550476	-0.0935125	0.393453	0.488107	-0.3433	0.522959	0.366119	0.56103	0.322213
356.96	-0.75277	-1.40664	-0.327321	1.78186	-0.800495	-0.436157	-0.12195	0.136164	1.17041	-0.152823	-0.495255	0.226368	0.244161	-0.582529	-0.0667082	0.384768	0.468669	-0.346735	0.517959	0.364194	0.578316	0.319945
357.44	-0.787682	-1.42019	-0.301587	1.7622	-0.833499	-0.413928	-0.129001	0.143528	1.16816	-0.109758	-0.517404	0.191409	0.240249	-0.612532	-0.0454342	0.374838	0.436647	-0.34582	0.50807	0.357498	0.594829	0.320032
357.92	-0.821135	-1.4322	-0.263541	1.74581	-0.863347	-0.346083	-0.139272	0.148548	1.16197	-0.0615309	-0.542424	0.16046	0.233534	-0.633859	-0.027718	0.366553	0.391376	-0.33765	0.492657	0.350619	0.607929	0.317475
358.4	-0.840054	-1.43974	-0.221723	1.72683	-0.885618	-0.2556	-0.151632	0.151625	1.14934	-0.0104063	-0.548137	0.147976	0.226258	-0.646	-0.008754	0.359712	0.33752	-0.321866	0.472548	0.349825	0.614503	0.309304
358.88	-0.833616	-1.44417	-0.185749	1.6932	-0.901642	-0.177004	-0.164053	0.153201	1.13191	0.039817	-0.530894	0.156587	0.223287	-0.652686	0.0147163	0.353779	0.284529	-0.302342	0.448898	0.356204	0.612763	0.297648
359.36	-0.802342	-1.45087	-0.160973	1.64195	-0.91455	-0.132916	-0.170063	0.152948	1.11061	0.0849445	-0.502575	0.17801	0.227415	-0.658482	0.0382517	0.347201	0.243197	-0.282702	0.423329	0.368379	0.600403	0.289359
359.84	-0.752792	-1.46545	-0.145482	1.57942	-0.928907	-0.116185	-0.165947	0.151383	1.09108	0.124644	-0.49292	0.19696	0.240008	-0.664945	0.0486332	0.341519	0.218179	-0.267614	0.395468	0.381066	0.579667	0.289367
360.32	-0.699398	-1.48624	-0.136156	1.51998	-0.942558	-0.0998408	-0.150559	0.150553	1.07955	0.162807	-0.509492	0.203613	0.257892	-0.671764	0.0408952	0.335544	0.20713	-0.25834	0.363464	0.388609	0.550617	0.299009
360.8	-0.654787	-1.50805	-0.12196	1.47823	-0.950939	-0.0671854	-0.127594	0.15051	1.07542	0.205341	-0.544279	0.199478	0.277281	-0.671987	0.00843656	0.327661	0.202706	-0.254962	0.327779	0.388563	0.513327	0.313723
361.28	-0.621229	-1.52276	-0.0937129	1.45789	-0.951155	-0.0142761	-0.104014	0.151964	1.07343	0.255451	-0.572398	0.188841	0.292672	-0.663606	-0.0395061	0.314585	0.1984	-0.259259	0.290161	0.382025	0.468982	0.32705
361.76	-0.589942	-1.53016	-0.0516154	1.45088	-0.941737	0.042406	-0.084802	0.15198	1.05864	0.313722	-0.574333	0.182225	0.301614	-0.646589	-0.0903916	0.298755	0.190617	-0.273514	0.255462	0.371022	0.418767	0.332826
362.24	-0.552544	-1.53179	-0.00130934	1.43728	-0.92871	0.0882951	-0.0696505	0.148292	1.03276	0.375888	-0.550787	0.184683	0.30521	-0.626708	-0.133824	0.283281	0.17865	-0.298843	0.227792	0.358815	0.367591	0.331502
362.72	-0.507869	-1.53204	0.0469355	1.41075	-0.920616	0.119544	-0.0534543	0.141748	1.00923	0.436162	-0.517561	0.200655	0.305311	-0.607668	-0.165133	0.274922	0.164414	-0.333266	0.210139	0.347159	0.322774	0.326568
363.2	-0.458578	-1.52897	0.0860615	1.37554	-0.923638	0.149542	-0.0304864	0.135013	1.00583	0.488527	-0.49433	0.226597	0.301847	-0.589768	-0.187544	0.27634	0.147987	-0.36949	0.201685	0.337851	0.288108	0.322227
363.68	-0.409812	-1.51898	0.111457	1.35294	-0.935149	0.183544	0.000344874	0.132006	1.03256	0.530065	-0.483785	0.256558	0.293428	-0.567687	-0.205111	0.288345	0.129026	-0.398665	0.197921	0.331506	0.265559	0.319835
364.16	-0.369687	-1.49529	0.131699	1.35641	-0.953744	0.227361	0.0342684	0.134231	1.07655	0.55964	-0.468672	0.285155	0.279497	-0.533592	-0.219125	0.30639	0.108307	-0.412867	0.196665	0.327338	0.25399	0.316788
364.64	-0.343661	-1.46052	0.154282	1.38226	-0.977455	0.26944	0.0632368	0.138561	1.11186	0.579233	-0.43036	0.308053	0.262268	-0.483426	-0.22725	0.322673	0.0870074	-0.413168	0.197164	0.323404	0.253017	0.311611
365.12	-0.330838	-1.42045	0.183288	1.40599	-1.00644	0.301502	0.0833795	0.139566	1.11696	0.592925	-0.357662	0.320495	0.246088	-0.421133	-0.224978	0.330913	0.0666744	-0.40473	0.200945	0.316839	0.262399	0.304869
365.6	-0.324427	-1.38643	0.216452	1.40113	-1.04147	0.32013	0.0964175	0.133444	1.09505	0.605987	-0.262102	0.324325	0.237384	-0.359336	-0.209518	0.327811	0.0463114	-0.39488	0.206908	0.305194	0.283109	0.298822
366.08	-0.31929	-1.36332	0.242643	1.36022	-1.07888	0.333624	0.109468	0.12101	1.06893	0.623739	-0.16723	0.32058	0.235537	-0.308075	-0.184881	0.313536	0.0234918	-0.386803	0.212579	0.293062	0.314058	0.295008
366.56	-0.304238	-1.34502	0.251705	1.30021	-1.11416	0.345446	0.131259	0.106425	1.06985	0.646489	-0.100645	0.308617	0.236035	-0.268819	-0.160007	0.29002	-0.00286451	-0.380167	0.21076	0.284277	0.347819	0.29507
367.04	-0.272498	-1.31591	0.238078	1.25744	-1.14213	0.346615	0.165812	0.0933613	1.10991	0.670117	-0.0754139	0.290819	0.230164	-0.232645	-0.142753	0.264131	-0.0310764	-0.372386	0.197302	0.284356	0.375616	0.29432
367.52	-0.224616	-1.26497	0.205631	1.25649	-1.16158	0.316147	0.211925	0.0826111	1.16985	0.689664	-0.083313	0.268864	0.211659	-0.184688	-0.140226	0.240143	-0.0566208	-0.362358	0.171713	0.295932	0.387108	0.289941
368	-0.164124	-1.18974	0.166268	1.29668	-1.17587	0.23948	0.261003	0.071642	1.21464	0.698688	-0.105063	0.246361	0.181271	-0.119698	-0.151014	0.217544	-0.0745326	-0.351369	0.140798	0.316062	0.381389	0.281673
368.48	-0.104843	-1.10713	0.128208	1.34723	-1.19248	0.121856	0.306096	0.0575283	1.2237	0.694989	-0.122023	0.22981	0.146017	-0.0469212	-0.1666	0.202449	-0.0831755	-0.342408	0.113572	0.339851	0.3653	0.273315
368.96	-0.0553404	-1.03714	0.100607	1.37347	-1.21511	-0.0106623	0.339244	0.0395559	1.19675	0.67908	-0.126133	0.2262	0.115448	0.0144998	-0.175551	0.193403	-0.0849942	-0.334412	0.0957471	0.36281	0.349589	0.27222
369.44	-0.024125	-0.992392	0.0853953	1.36687	-1.24059	-0.125715	0.357072	0.0197053	1.15524	0.656437	-0.116147	0.240618	0.0947913	0.0449124	-0.167997	0.190077	-0.0851528	-0.323825	0.0895669	0.38221	0.341313	0.28199
369.92	-0.0153371	-0.972325	0.077409	1.34374	-1.26474	-0.203499	0.358363	0.000476663	1.11458	0.635418	-0.0964862	0.274115	0.0847781	0.0392351	-0.142814	0.188732	-0.0879189	-0.306296	0.0890984	0.397964	0.340704	0.300371
370.4	-0.0283462	-0.965095	0.0702826	1.34385	-1.28255	-0.251156	0.34747	-0.0169638	1.07164	0.621386	-0.0691591	0.325985	0.0843396	0.00971717	-0.106197	0.183756	-0.0951984	-0.280887	0.0875362	0.410472	0.340501	0.320435
370.88	-0.0618921	-0.955786	0.0591786	1.39009	-1.29017	-0.293939	0.327833	-0.0325713	1.01093	0.617097	-0.0272257	0.390584	0.0916471	-0.0207332	-0.0735337	0.168908	-0.106997	-0.252205	0.0801666	0.419275	0.333119	0.336516
371.36	-0.113857	-0.937515	0.0436091	1.47756	-1.29171	-0.356722	0.306965	-0.0468326	0.918631	0.618979	0.0330377	0.461298	0.109462	-0.0344124	-0.0565269	0.143352	-0.121556	-0.227921	0.0680264	0.422846	0.317569	0.346009
371.84	-0.179364	-0.916039	0.0270708	1.57386	-1.29268	-0.441148	0.291488	-0.0571127	0.803829	0.619002	0.10263	0.529827	0.139191	-0.0256461	-0.0630219	0.113061	-0.135587	-0.21314	0.0571851	0.421598	0.298222	0.352947
372.32	-0.252879	-0.900262	0.0097838	1.64559	-1.2956	-0.526964	0.285915	-0.0602603	0.69367	0.611332	0.161168	0.587665	0.178439	-0.00112953	-0.0928854	0.0836371	-0.146367	-0.20628	0.0551571	0.417273	0.284774	0.365441
372.8	-0.329625	-0.895038	-0.00652883	1.67623	-1.30115	-0.581244	0.288075	-0.0548578	0.616222	0.595688	0.185682	0.626139	0.218291	0.0254757	-0.139523	0.0633505	-0.150085	-0.201692	0.0654862	0.412985	0.284566	0.386497
373.28	-0.404331	-0.893961	-0.0270765	1.67534	-1.30584	-0.592605	0.293742	-0.0432838	0.578985	0.579624	0.164585	0.643907	0.249543	0.0428797	-0.191588	0.0530539	-0.145639	-0.193288	0.0887078	0.408451	0.297236	0.415096
373.76	-0.472824	-0.891642	-0.0557178	1.66243	-1.30857	-0.570305	0.30034	-0.0311214	0.566424	0.570251	0.111944	0.646413	0.215649	0.046674	-0.240211	0.049889	-0.135208	-0.175963	0.119424	0.404236	0.316901	0.444322
374.24	-0.532188	-0.88485	-0.0915286	1.64768	-1.31095	-0.549431	0.306921	-0.0230684	0.551478	0.568665	0.0536374	0.643983	0.213952	0.0364884	-0.277043	0.0484804	-0.123261	-0.150861	0.150732	0.399529	0.335137	0.466562
374.72	-0.578241	-0.879827	-0.128914	1.62991	-1.31422	-0.56673	0.315789	-0.0202859	0.517624	0.572309	0.0172947	0.645647	0.20558	0.0161058	-0.298877	0.0432054	-0.116104	-0.122313	0.176288	0.393165	0.346513	0.479474
375.2	-0.60769	-0.884319	-0.162379	1.6049	-1.32076	-0.631632	0.33207	-0.0195485	0.46886	0.57588	0.0149643	0.656649	0.200904	-0.0111677	-0.306017	0.0330494	-0.115722	-0.097058	0.189721	0.387432	0.348644	0.480974
375.68	-0.62378	-0.901419	-0.183552	1.56723	-1.33295	-0.730654	0.354356	-0.0158575	0.427604	0.578127	0.0374832	0.673561	0.204703	-0.0391082	-0.304675	0.0184132	-0.119011	-0.0795242	0.188056	0.383176	0.343465	0.474927
376.16	-0.632529	-0.92435	-0.191896	1.52914	-1.34948	-0.823658	0.382059	-0.00684442	0.412966	0.58018	0.0661561	0.686566	0.214793	-0.0627208	-0.30301	0.00413151	-0.119135	-0.071068	0.171697	0.381156	0.334158	0.464821
376.64	-0.645651	-0.944688	-0.185373	1.49541	-1.36899	-0.873987	0.409954	0.00523112	0.431695	0.581847	0.0895391	0.688632	0.227051	-0.078525	-0.30378	-0.00632718	-0.108958	-0.0680513	0.142665	0.380769	0.324265	0.45094
377.12	-0.670828	-0.957099	-0.162262	1.4685	-1.38772	-0.865048	0.435549	0.0156374	0.474259	0.581184	0.110548	0.679975	0.235872	-0.0842882	-0.306871	-0.0116394	-0.0846924	-0.0656087	0.106876	0.380041	0.315181	0.433541
377.6	-0.707863	-0.966422	-0.122322	1.43974	-1.40753	-0.80516	0.455448	0.0211729	0.520564	0.571265	0.137616	0.665235	0.239464	-0.0807468	-0.307676	-0.0113453	-0.0510377	-0.0576176	0.0717413	0.373477	0.30582	0.414369
378.08	-0.750156	-0.978814	-0.0650233	1.40566	-1.42655	-0.7205	0.467453	0.0214311	0.551344	0.548592	0.173726	0.653276	0.239839	-0.0715325	-0.299696	-0.00674313	-0.017794	-0.0423114	0.0420307	0.36006	0.29404	0.393674
378.56	-0.786223	-0.998112	0.00331599	1.36898	-1.4435	-0.642396	0.470519	0.0191486	0.555929	0.519862	0.212455	0.646752	0.241317	-0.0585191	-0.284392	-0.0026983	0.00564817	-0.0203853	0.0219946	0.340892	0.278752	0.375321
379.04	-0.806389	-1.0207	0.0698778	1.33268	-1.45831	-0.585875	0.467761	0.0179971	0.530075	0.492524	0.238855	0.642469	0.245393	-0.0403004	-0.267055	0.000529127	0.0126437	0.00143442	0.0109411	0.320476	0.26208	0.362662
379.52	-0.805004	-1.04057	0.120779	1.30049	-1.46903	-0.550739	0.46271	0.0195326	0.479601	0.472682	0.24734	0.631155	0.25272	-0.0159772	-0.255528	-0.00187939	0.00415571	0.0178039	0.00844736	0.302356	0.25126	0.357908
380	-0.782225	-1.05051	0.146512	1.27147	-1.47656	-0.522969	0.462904	0.0231733	0.409252	0.454944	0.238722	0.603639	0.26021	0.0148591	-0.251408	-0.0081232	-0.0126621	0.0266717	0.0109583	0.289242	0.250851	0.361639
380.48	-0.745601	-1.05253	0.145611	1.24811	-1.48042	-0.484451	0.471182	0.0272325	0.32408	0.426839	0.228684	0.557189	0.264512	0.0486924	-0.252074	-0.0173243	-0.0299118	0.0285547	0.0146257	0.280843	0.262448	0.371378
380.96	-0.699769	-1.05301	0.127883	1.22838	-1.48194	-0.421992	0.485376	0.030078	0.232673	0.377689	0.233292	0.498143	0.264038	0.0803342	-0.253269	-0.0262401	-0.0414162	0.0285145	0.0179041	0.274403	0.278597	0.383592
381.44	-0.648553	-1.05525	0.108256	1.20212	-1.48168	-0.330366	0.497749	0.0329248	0.141054	0.305736	0.253185	0.439849	0.261819	0.101707	-0.252039	-0.0352349	-0.0440695	0.0295901	0.02055	0.267551	0.288936	0.396388
381.92	-0.591646	-1.06083	0.101274	1.14965	-1.48057	-0.213084	0.499351	0.0378316	0.0583397	0.220093	0.280191	0.396643	0.261425	0.109973	-0.253179	-0.0460933	-0.0391281	0.0317324	0.0220667	0.261182	0.286378	0.409012
382.4	-0.527247	-1.06577	0.113783	1.06051	-1.47843	-0.0806921	0.485452	0.047481	-0.00920473	0.134509	0.297257	0.376126	0.266209	0.103079	-0.262383	-0.0614178	-0.0298448	0.0315981	0.0249691	0.256607	0.273015	0.423963
382.88	-0.452003	-1.06515	0.142204	0.949003	-1.47755	0.0487442	0.462841	0.0632315	-0.0513385	0.0589335	0.286766	0.376321	0.27389	0.0870942	-0.287277	-0.0815373	-0.0158636	0.0255411	0.0285445	0.255767	0.258051	0.441227
383.36	-0.368006	-1.06198	0.176844	0.850691	-1.47643	0.160124	0.443458	0.0837404	-0.0618464	-0.00335227	0.243402	0.385395	0.277814	0.0678211	-0.327072	-0.100768	0.00323584	0.0124974	0.0331757	0.260577	0.250068	0.458047
383.84	-0.279806	-1.05997	0.203717	0.804046	-1.47385	0.242628	0.431685	0.105987	-0.0397037	-0.0490325	0.179053	0.391939	0.269512	0.0516044	-0.375594	-0.115381	0.0281214	-0.00546764	0.0376496	0.271317	0.254536	0.468716
384.32	-0.200725	-1.06332	0.215481	0.815198	-1.47049	0.296679	0.43251	0.1271	0.00338008	-0.0746767	0.115813	0.387883	0.244951	0.0416293	-0.422678	-0.120803	0.0569695	-0.0249867	0.0403026	0.286916	0.269495	0.472035
384.8	-0.145211	-1.06811	0.212532	0.849397	-1.46225	0.322795	0.442733	0.145828	0.047662	-0.0795048	0.0772913	0.371205	0.206499	0.0373865	-0.464873	-0.115302	0.0844918	-0.0420293	0.0413657	0.304095	0.287308	0.468942
385.28	-0.127128	-1.0673	0.200734	0.850517	-1.44795	0.325029	0.456656	0.162163	0.0729243	-0.0671928	0.0745989	0.354082	0.161736	0.0351048	-0.501216	-0.103617	0.108254	-0.0559922	0.0412283	0.319447	0.30124	0.465736
385.76	-0.147866	-1.05384	0.184528	0.804182	-1.43002	0.298345	0.472402	0.176872	0.0740214	-0.0498083	0.105983	0.347832	0.118753	0.0284261	-0.536963	-0.0908856	0.125646	-0.0691535	0.0400759	0.326656	0.310263	0.471322
386.24	-0.194123	-1.02916	0.167993	0.764366	-1.40964	0.244205	0.493512	0.191424	0.0575827	-0.0410556	0.153271	0.361003	0.0818712	0.0130889	-0.574589	-0.0786286	0.138241	-0.0823312	0.0379454	0.323423	0.314109	0.488502
386.72	-0.247736	-0.998388	0.152282	0.822191	-1.38745	0.168681	0.520416	0.205505	0.0438675	-0.0482533	0.194381	0.393082	0.049168	-0.0120897	-0.610102	-0.0684152	0.148461	-0.0972058	0.0365271	0.310124	0.311803	0.512531
387.2	-0.290187	-0.971797	0.139433	1.03746	-1.36442	0.0955303	0.548224	0.217975	0.0453524	-0.0675285	0.213895	0.437956	0.0159423	-0.0470399	-0.634473	-0.0619265	0.157445	-0.109153	0.0375375	0.290793	0.306217	0.534786
387.68	-0.311805	-0.955842	0.137403	1.373	-1.33979	0.053595	0.568675	0.226345	0.0605312	-0.0865262	0.216424	0.487525	-0.0213646	-0.0876955	-0.638263	-0.0633765	0.163503	-0.114043	0.0455239	0.2732	0.303158	0.548117
388.16	-0.313839	-0.948007	0.152475	1.70555	-1.31409	0.0549026	0.576893	0.229301	0.0771018	-0.0956562	0.2177	0.535585	-0.0626928	-0.129866	-0.615454	-0.0763794	0.164946	-0.109417	0.0642055	0.26215	0.311478	0.55213
388.64	-0.302423	-0.942899	0.188183	1.89871	-1.28839	0.0890108	0.572384	0.226649	0.0852137	-0.0959378	0.240681	0.578001	-0.102863	-0.171677	-0.5668	-0.0989587	0.16158	-0.0965848	0.0949561	0.259491	0.334143	0.55107
389.12	-0.28551	-0.931046	0.237748	1.90024	-1.26607	0.115298	0.562699	0.219368	0.0866344	-0.0949587	0.296172	0.613037	-0.134653	-0.211003	-0.499084	-0.124347	0.156812	-0.0801151	0.133824	0.262762	0.371021	0.550345
389.6	-0.264343	-0.909782	0.284372	1.76692	-1.24925	0.086798	0.559554	0.209736	0.0951958	-0.100167	0.373088	0.638703	-0.137005	-0.24327	-0.425513	-0.142999	0.153595	-0.0677134	0.175491	0.270965	0.415801	0.550282
390.08	-0.245086	-0.880602	0.316257	1.61767	-1.24053	-0.0072742	0.571004	0.200042	0.127139	-0.113085	0.448556	0.649865	-0.139936	-0.261952	-0.3547	-0.146608	0.153361	-0.0641456	0.214914	0.283088	0.456366	0.547004
390.56	-0.235455	-0.847274	0.326374	1.5445	-1.23709	-0.13963	0.598133	0.191583	0.183033	-0.126071	0.503701	0.642765	-0.130388	-0.257968	-0.29649	-0.135012	0.15521	-0.0690279	0.249837	0.300117	0.489139	0.536746
391.04	-0.245878	-0.813614	0.323212	1.56212	-1.23569	-0.254929	0.634128	0.184069	0.247765	-0.127433	0.529835	0.616125	-0.114735	-0.225221	-0.253264	-0.112376	0.155594	-0.0774461	0.281491	0.31871	0.508966	0.520166
391.52	-0.281704	-0.779087	0.319049	1.61595	-1.23126	-0.300293	0.669114	0.175831	0.305361	-0.111422	0.537903	0.572977	-0.0987244	-0.165673	-0.222786	-0.0864155	0.151752	-0.0826634	0.312914	0.336203	0.525044	0.499118
392	-0.342423	-0.741608	0.322481	1.64832	-1.22003	-0.265513	0.695218	0.164975	0.348256	-0.078493	0.544457	0.525303	-0.0878013	-0.0947438	-0.204864	-0.0639028	0.142223	-0.0803106	0.344294	0.349575	0.541246	0.478978
392.48	-0.407691	-0.701406	0.332805	1.64576	-1.20127	-0.182279	0.712344	0.152138	0.384667	-0.0369094	0.559823	0.484281	-0.0823499	-0.0333083	-0.198349	-0.0461149	0.127843	-0.0724904	0.374407	0.358201	0.55769	0.459698
392.96	-0.455412	-0.659548	0.340147	1.64085	-1.17543	-0.0983469	0.727614	0.139492	0.428583	0.00605448	0.572312	0.463021	-0.0797668	-0.00139487	-0.200001	-0.0309491	0.110825	-0.0651799	0.398745	0.365156	0.57107	0.44052
393.44	-0.471618	-0.620908	0.336549	1.67825	-1.14658	-0.0463026	0.751465	0.130873	0.487909	0.042779	0.565002	0.465925	-0.0760694	-0.00767762	-0.209072	-0.0145793	0.096527	-0.0658936	0.413877	0.37334	0.576998	0.420609
393.92	-0.462488	-0.590762	0.320998	1.76756	-1.11934	-0.0239627	0.78933	0.128067	0.553448	0.0689215	0.522389	0.493938	-0.0683945	-0.0453743	-0.225035	0.00675225	0.090514	-0.0776997	0.41746	0.384641	0.574417	0.40246
394.4	-0.448714	-0.567519	0.303302	1.88744	-1.09765	-0.0036276	0.83922	0.130454	0.610759	0.0824038	0.451499	0.541588	-0.056365	-0.0978018	-0.247305	0.0341918	0.0966639	-0.099481	0.413499	0.396032	0.564799	0.389482
394.88	-0.451288	-0.548515	0.29359	2.00432	-1.08257	0.0415671	0.891763	0.13479	0.642468	0.0836615	0.375795	0.598258	-0.0426694	-0.146191	-0.276682	0.0698655	0.114672	-0.126022	0.406568	0.404629	0.550363	0.385322
395.36	-0.480348	-0.531341	0.295798	2.09556	-1.07065	0.115018	0.938853	0.138004	0.646036	0.0787975	0.318413	0.651305	-0.0309476	-0.179811	-0.307987	0.113351	0.140671	-0.152044	0.401803	0.409181	0.532042	0.389173
395.84	-0.524583	-0.512536	0.307509	2.16417	-1.05928	0.201768	0.972577	0.13796	0.632687	0.0791991	0.287296	0.69188	-0.0202613	-0.199835	-0.331767	0.162775	0.166917	-0.173036	0.402244	0.412799	0.50967	0.397418
396.32	-0.570588	-0.495632	0.324594	2.21911	-1.04668	0.276059	0.990586	0.134691	0.618471	0.0923826	0.272576	0.715412	-0.00949161	-0.215705	-0.342391	0.213238	0.184295	-0.187752	0.406269	0.416959	0.484593	0.405745
396.8	-0.601642	-0.485471	0.344384	2.26568	-1.03212	0.323627	0.991335	0.129546	0.609597	0.118556	0.254636	0.721693	0.00322339	-0.238034	-0.33401	0.26324	0.188794	-0.197213	0.409096	0.425154	0.457065	0.412561
397.28	-0.614125	-0.484787	0.365749	2.30062	-1.01865	0.346746	0.97359	0.122556	0.61004	0.150285	0.226339	0.714178	0.0175333	-0.266974	-0.311234	0.31258	0.179048	-0.201814	0.408104	0.436506	0.430852	0.417978
397.76	-0.61485	-0.491697	0.390031	2.32126	-1.00686	0.351947	0.936074	0.111255	0.616113	0.177965	0.189438	0.695878	0.0301632	-0.295092	-0.284053	0.364563	0.159969	-0.202409	0.401746	0.448299	0.411394	0.423518
398.24	-0.614612	-0.502875	0.418257	2.32695	-0.995134	0.344608	0.881885	0.0938146	0.621109	0.197262	0.15434	0.666606	0.0349549	-0.307231	-0.262679	0.42072	0.139055	-0.198516	0.395674	0.458766	0.400588	0.428905
398.72	-0.621834	-0.512246	0.449831	2.32028	-0.981197	0.319879	0.824039	0.0693768	0.623984	0.215046	0.120638	0.626495	0.0282761	-0.291614	-0.249416	0.477477	0.123909	-0.190922	0.395877	0.46827	0.39629	0.430728
399.2	-0.635713	-0.517976	0.483493	2.30213	-0.962698	0.275559	0.778714	0.040855	0.623192	0.247662	0.0728765	0.575586	0.0126724	-0.245677	-0.239704	0.528532	0.119111	-0.182264	0.40741	0.475566	0.393137	0.425473
399.68	-0.656917	-0.521613	0.516819	2.26813	-0.938537	0.213183	0.760452	0.0138302	0.620239	0.305881	-0.00118933	0.520829	-0.00514495	-0.178537	-0.224078	0.570593	0.124739	-0.176268	0.4286	0.479927	0.387495	0.415042
400.16	-0.682995	-0.526346	0.542527	2.21783	-0.90914	0.135791	0.774879	-0.00758109	0.621071	0.389877	-0.104404	0.473679	-0.0167614	-0.106959	-0.200609	0.60733	0.135613	-0.175623	0.454228	0.478939	0.371445	0.401967
400.64	-0.713093	-0.535617	0.552382	2.15518	-0.87741	0.045663	0.808474	-0.0223195	0.637129	0.488715	-0.219166	0.447733	-0.0180732	-0.0474159	-0.172135	0.644982	0.142008	-0.180414	0.475699	0.471364	0.346903	0.389815
401.12	-0.745625	-0.550807	0.539101	2.09014	-0.84645	-0.0649636	0.841288	-0.0304982	0.678009	0.580566	-0.312794	0.447167	-0.0102651	-0.00669953	-0.151111	0.691627	0.134513	-0.188137	0.489575	0.457746	0.320603	0.379817
401.6	-0.772243	-0.566947	0.500151	2.03078	-0.819113	-0.1973	0.854582	-0.0332962	0.745636	0.650166	-0.367476	0.466196	-6.40892e-05	0.0164902	-0.141613	0.745723	0.109319	-0.19583	0.496294	0.44385	0.298694	0.368869
402.08	-0.780686	-0.581847	0.443405	1.98228	-0.797011	-0.340512	0.839757	-0.031789	0.831496	0.690556	-0.384901	0.490679	0.00705259	0.0330972	-0.14454	0.801165	0.0710233	-0.199677	0.498753	0.432122	0.293004	0.357056
402.56	-0.766763	-0.593716	0.380747	1.94178	-0.780054	-0.463687	0.805775	-0.0246602	0.91556	0.703692	-0.389079	0.506749	0.00881999	0.051889	-0.151552	0.844045	0.0320758	-0.199201	0.500683	0.423414	0.308001	0.345879
403.04	-0.72689	-0.601922	0.325444	1.90616	-0.7651	-0.5336	0.768687	-0.0121605	0.978189	0.695978	-0.399209	0.505821	0.00762995	0.0775492	-0.15423	0.868143	0.00304197	-0.194787	0.500888	0.418215	0.340794	0.34192
403.52	-0.664767	-0.609186	0.280632	1.87429	-0.748549	-0.531048	0.739131	0.00515913	1.01184	0.675311	-0.417665	0.486877	0.00691031	0.108978	-0.151171	0.872103	-0.0116612	-0.18797	0.498029	0.415008	0.390336	0.349308
404	-0.593896	-0.618963	0.249567	1.84581	-0.725004	-0.469942	0.719246	0.024194	1.02149	0.647138	-0.439943	0.455183	0.00800423	0.141637	-0.144578	0.865662	-0.0173753	-0.180779	0.491559	0.414203	0.449364	0.366329
404.48	-0.527413	-0.631798	0.228033	1.82318	-0.693296	-0.385529	0.707034	0.0415254	1.01836	0.616755	-0.453322	0.415218	0.00791925	0.168901	-0.140937	0.857845	-0.0250274	-0.174652	0.48489	0.417247	0.512856	0.384539
404.96	-0.479075	-0.648428	0.212463	1.7991	-0.652135	-0.320407	0.69263	0.0543085	1.01652	0.589507	-0.459787	0.372606	0.00332419	0.19069	-0.141324	0.851792	-0.0398562	-0.172111	0.483276	0.423637	0.572035	0.395946
405.44	-0.457452	-0.671956	0.2004	1.77059	-0.607236	-0.292775	0.671791	0.0616484	1.01962	0.569869	-0.471659	0.332299	-0.00611337	0.209753	-0.140783	0.848864	-0.0594469	-0.176421	0.489759	0.430347	0.622167	0.395034
405.92	-0.462197	-0.70113	0.187714	1.73504	-0.560447	-0.294814	0.648809	0.0635165	1.02453	0.561921	-0.501744	0.302137	-0.0163057	0.229485	-0.135372	0.846021	-0.074965	-0.188452	0.504696	0.435883	0.656927	0.385792
406.4	-0.482815	-0.733964	0.166716	1.69827	-0.514535	-0.291508	0.628918	0.0609903	1.02659	0.567812	-0.549267	0.286303	-0.0212179	0.253415	-0.120766	0.838338	-0.0764765	-0.207477	0.520067	0.441098	0.676508	0.376249
406.88	-0.502805	-0.769417	0.132628	1.6634	-0.467355	-0.257018	0.621199	0.0553027	1.02556	0.585412	-0.599816	0.28332	-0.0178004	0.279352	-0.0973621	0.822225	-0.0618498	-0.228562	0.529961	0.457096	0.685906	0.371789
407.36	-0.504992	-0.804409	0.0847139	1.63349	-0.417885	-0.183248	0.626508	0.0490753	1.02105	0.60938	-0.634455	0.282952	-0.00513755	0.302503	-0.0671763	0.796796	-0.0369805	-0.243505	0.529297	0.475866	0.691709	0.373532
407.84	-0.487866	-0.83775	0.0327726	1.61044	-0.367361	-0.0887649	0.644132	0.0452488	1.01438	0.634345	-0.647538	0.269733	0.0127838	0.315471	-0.0375218	0.763504	-0.0121624	-0.246428	0.519997	0.504234	0.695313	0.37688
408.32	-0.462472	-0.868888	-0.0120583	1.58907	-0.355129	-0.00659824	0.664203	0.0472721	1.0042	0.655178	-0.641556	0.233705	0.0304046	0.313413	-0.0106563	0.726987	0.00361033	-0.236473	0.508132	0.538646	0.697761	0.3752
408.8	-0.447379	-0.89998	-0.0368502	1.56581	-0.318039	0.0365702	0.676076	0.0546717	0.983742	0.671544	-0.620224	0.176888	0.0466375	0.295646	0.00864908	0.695128	0.00841919	-0.217006	0.500117	0.571222	0.699571	0.367681
409.28	-0.455499	-0.926166	-0.0440824	1.53739	-0.299159	0.0410709	0.672923	0.0651251	0.954906	0.686567	-0.590081	0.109193	0.0618415	0.267772	0.0207241	0.67732	0.00608854	-0.19351	0.499171	0.594526	0.696935	0.358384
409.76	-0.48853	-0.948321	-0.0428529	1.50004	-0.301236	0.0304808	0.656704	0.0744014	0.918459	0.706656	-0.547733	0.0413318	0.0780898	0.236056	0.0247259	0.678172	0.00279384	-0.171305	0.50452	0.608567	0.695049	0.354242
410.24	-0.538938	-0.964025	-0.0478106	1.45113	-0.317738	0.0395756	0.639139	0.0806609	0.881135	0.73227	-0.494231	-0.0182294	0.096119	0.208726	0.0265779	0.696618	0.00218652	-0.154463	0.511509	0.615362	0.694769	0.356337
410.72	-0.597246	-0.974896	-0.0678793	1.38749	-0.3419	0.0942463	0.63172	0.0844195	0.839726	0.758275	-0.432587	-0.0654515	0.114277	0.192263	0.0319786	0.724679	0.00347011	-0.143078	0.515341	0.620474	0.695666	0.362233
411.2	-0.659426	-0.984142	-0.102737	1.31822	-0.366875	0.197067	0.638524	0.0890541	0.789607	0.775499	-0.374311	-0.0969009	0.129997	0.189928	0.0486465	0.753247	0.00192611	-0.136297	0.513525	0.626354	0.691339	0.367255
411.68	-0.723267	-0.996796	-0.142862	1.24861	-0.386741	0.32618	0.657805	0.0977093	0.724442	0.774223	-0.323907	-0.110013	0.141589	0.201162	0.0798154	0.776292	-0.00755863	-0.133911	0.507523	0.632549	0.676588	0.366078
[truncated: 184 more rows]

## Sheet: CA3 small ripple
0	719301	521501	659105	580601	526202	525403	525101	521602	719001	520901	719103	521202	525404	719002	520701	525003	521502	521101	719303	719201	525301	525001	659101	521401	580201	580501	521302	520702	521303	521102	521304	719202
[truncated: 2,084 more rows]

[truncated: 4 more sheets: CA1 small ripple, DG big ripple, CA3 big ripple, CA1 big ripple]
