# Supplementary material for: UP-DOWN states and ripples differentially modulate membrane potential dynamics across DG, CA3, and CA1 in awake mice
Source: eLife. 2022 Jul 12;11:e69596. doi: 10.7554/eLife.69596 (PMC9275824; doi:10.7554/eLife.69596)
Supplement: Figure 7—source data 1. [file elife-69596-fig7-data1.xls]

## Sheet: DG small ripple
0	524201	524202	523701	523302	523502	523901	523301	524203	524102	523801	524002	523401	523601	523402	523501	523702	524101	524003	524001	659202	523602	659201
-499.84	1.26476	-0.340618	0.974793	0.820727	-0.198974	-0.71917	0.111035	-0.307534	-0.547559	0.827173	-0.417967	0.908846	0.198313	0.232275	-0.60385	0.45845	0.174156	0.24404	0.124149	0.399094	0.0696047	0.500392
-499.36	1.1797	-0.36239	0.950925	0.811337	-0.175429	-0.662047	0.0804629	-0.312756	-0.546954	0.78064	-0.429727	0.944967	0.182897	0.225659	-0.629496	0.478654	0.203366	0.234838	0.140506	0.40043	0.026797	0.508342
-498.88	1.08669	-0.381208	0.932757	0.785856	-0.15784	-0.608538	0.0498229	-0.310101	-0.556481	0.73939	-0.44268	0.963325	0.164064	0.216835	-0.653068	0.498887	0.231588	0.231855	0.164221	0.393872	-0.014275	0.515368
-498.4	0.982051	-0.393123	0.920612	0.749837	-0.148346	-0.551666	0.0220499	-0.299896	-0.576859	0.702954	-0.452238	0.969598	0.144727	0.208808	-0.67095	0.518811	0.259021	0.2351	0.187384	0.383116	-0.0474776	0.524676
-497.92	0.867078	-0.395023	0.913704	0.721649	-0.144685	-0.478116	0.000509188	-0.28456	-0.60173	0.66953	-0.451507	0.972547	0.128567	0.203746	-0.679848	0.545511	0.286382	0.246279	0.204015	0.370843	-0.06657	0.536841
-497.44	0.749829	-0.392459	0.908245	0.716002	-0.142795	-0.383213	-0.0162093	-0.26662	-0.62245	0.640152	-0.430937	0.983014	0.115376	0.200796	-0.677799	0.583737	0.312217	0.265499	0.210781	0.355434	-0.073301	0.551116
-496.96	0.639028	-0.257549	0.901513	0.73532	-0.138732	-0.272425	-0.0284032	-0.24945	-0.629581	0.617155	-0.377116	1.00162	0.104825	0.197926	-0.670035	0.634014	0.334475	0.292302	0.210062	0.332971	-0.0682704	0.565152
-496.48	0.545828	-0.273552	0.894789	0.773789	-0.134733	-0.169289	-0.0376585	-0.236677	-0.614747	0.606519	-0.282736	1.01649	0.0959642	0.181373	-0.660955	0.688885	0.350405	0.321484	0.205272	0.30317	-0.0502944	0.576387
-496	0.476073	-0.297523	0.890619	0.812232	-0.136338	-0.0965042	-0.0459271	-0.231177	-0.583752	0.607194	-0.159808	1.01633	0.0894877	0.165964	-0.653912	0.737851	0.358735	0.344294	0.198037	0.27244	-0.0182411	0.584877
-495.52	0.434821	-0.318893	0.894977	0.838351	-0.147947	-0.0596478	-0.0557654	-0.233372	-0.54034	0.613338	-0.0281797	0.995637	0.0842625	0.158496	-0.651944	0.774197	0.360356	0.352239	0.186553	0.25014	0.0281062	0.593756
-495.04	0.428151	-0.330897	0.911438	0.847143	-0.165912	-0.0526472	-0.0667973	-0.241094	-0.492282	0.616951	0.0853868	0.966319	0.0780549	0.162541	-0.654569	0.797283	0.356258	0.340373	0.1704	0.245755	0.0872844	0.605206
-494.56	0.448977	-0.332055	0.934578	0.840553	-0.181429	-0.0613558	-0.0772318	-0.250076	-0.435194	0.614045	0.160065	0.939175	0.067703	0.175377	-0.660896	0.815235	0.346913	0.312091	0.152083	0.261607	0.149818	0.620215
-494.08	0.4851	-0.329284	0.954182	0.833597	-0.187576	-0.0737621	-0.0844059	-0.256571	-0.362951	0.607057	0.190317	0.922144	0.052656	0.186783	-0.66655	0.833598	0.332236	0.275232	0.137173	0.288346	0.207216	0.637169
-493.6	0.520862	-0.330593	0.959613	0.832529	-0.182664	-0.0872356	-0.0873002	-0.261349	-0.268846	0.601676	0.189861	0.914888	0.0335172	0.190254	-0.669695	0.856724	0.313971	0.238219	0.131307	0.316678	0.254826	0.651571
-493.12	0.53984	-0.338867	0.947953	0.84064	-0.173324	-0.109051	-0.0845278	-0.267423	-0.158848	0.604671	0.178119	0.908073	0.011983	0.183364	-0.669744	0.880131	0.29433	0.205454	0.135404	0.337088	0.290854	0.660944
-492.64	0.539936	-0.352942	0.925418	0.860318	-0.168212	-0.147606	-0.0756713	-0.278882	-0.0513248	0.616278	0.169563	0.895758	-0.0103997	0.169927	-0.668152	0.894284	0.279164	0.178041	0.145652	0.34713	0.317015	0.665214
-492.16	0.524062	-0.370123	0.902083	0.883172	-0.17663	-0.205108	-0.0641526	-0.29535	0.0325958	0.633174	0.168061	0.882967	-0.0358549	0.159433	-0.670675	0.896232	0.272941	0.15431	0.152416	0.349962	0.333844	0.665333
-491.68	0.505381	-0.388378	0.889811	0.902256	-0.197554	-0.276864	-0.0538056	-0.310357	0.0827796	0.645593	0.172901	0.879897	-0.0619309	0.15823	-0.681634	0.885088	0.276911	0.133009	0.148538	0.351369	0.340292	0.66367
-491.2	0.492134	-0.407481	0.892048	0.91164	-0.221806	-0.354724	-0.0487456	-0.315912	0.106287	0.648721	0.176046	0.89111	-0.0859815	0.16682	-0.699127	0.862364	0.286008	0.113811	0.131863	0.354287	0.334899	0.662146
-490.72	0.482898	-0.428607	0.902646	0.903206	-0.24123	-0.436211	-0.0489021	-0.307554	0.125462	0.641874	0.180925	0.910957	-0.101161	0.182049	-0.718013	0.834171	0.291754	0.0980197	0.105796	0.358073	0.322871	0.662484
-490.24	0.470796	-0.448461	0.911136	0.869907	-0.249449	-0.519437	-0.0538777	-0.289075	0.158062	0.637791	0.190881	0.927579	-0.101621	0.196329	-0.729957	0.802986	0.288663	0.087968	0.0753704	0.362832	0.310128	0.664405
-489.76	0.444948	-0.463094	0.905933	0.816085	-0.248965	-0.600056	-0.0607691	-0.268763	0.214765	0.647408	0.199849	0.931619	-0.0854162	0.203084	-0.730217	0.770069	0.275175	0.0847118	0.0462243	0.368702	0.305898	0.667816
-489.28	0.395348	-0.46674	0.882154	0.74829	-0.247385	-0.671621	-0.0643498	-0.2561	0.28737	0.679679	0.194753	0.926439	-0.0585663	0.198038	-0.720639	0.737917	0.255133	0.0872118	0.0197937	0.374832	0.310809	0.671187
-488.8	0.330213	-0.458416	0.841173	0.6834	-0.253396	-0.72881	-0.0650488	-0.25373	0.362396	0.730907	0.154837	0.925338	-0.0318987	0.179773	-0.710411	0.708356	0.233893	0.095181	-0.00422368	0.38536	0.321622	0.673436
-488.32	0.256377	-0.440904	0.786915	0.633514	-0.272077	-0.770465	-0.0613685	-0.258871	0.425032	0.789441	0.0785546	0.940033	-0.0157923	0.152484	-0.704988	0.682701	0.212289	0.105592	-0.0261553	0.400677	0.327446	0.674969
-487.84	0.183846	-0.418778	0.727071	0.597312	-0.300178	-0.795289	-0.0545512	-0.266083	0.469929	0.836609	-0.01939	0.971927	-0.0145642	0.122806	-0.707135	0.657759	0.190107	0.116809	-0.0467643	0.42115	0.325029	0.675489
-487.36	0.115974	-0.393573	0.672481	0.573771	-0.331432	-0.800713	-0.0462455	-0.272095	0.494555	0.862307	-0.10313	1.00577	-0.028029	0.0975591	-0.71033	0.628173	0.166162	0.126206	-0.065191	0.44523	0.313968	0.676487
-486.88	0.050727	-0.36483	0.633189	0.555391	-0.356556	-0.787862	-0.0371	-0.278214	0.502366	0.863562	-0.143866	1.0268	-0.0489106	0.0790382	-0.703236	0.590316	0.143787	0.131248	-0.0808795	0.469918	0.301648	0.678387
-486.4	-0.0208467	-0.326626	0.616005	0.54367	-0.369285	-0.765335	-0.0249664	-0.286964	0.494915	0.852034	-0.134642	1.02696	-0.0719765	0.0626057	-0.679909	0.549367	0.128935	0.130672	-0.0915386	0.491004	0.289752	0.68049
-485.92	-0.0994581	-0.283336	0.624452	0.547941	-0.366674	-0.752156	-0.00595875	-0.29881	0.475566	0.841039	-0.0883062	1.01285	-0.0942007	0.0428373	-0.640817	0.509846	0.126522	0.124357	-0.0953045	0.50534	0.279285	0.68071
-485.44	-0.183343	-0.240954	0.652108	0.572676	-0.353402	-0.768022	0.0192499	-0.311318	0.450219	0.839533	-0.0408855	0.994853	-0.113704	0.0153827	-0.598785	0.47874	0.138747	0.113573	-0.0896259	0.511176	0.267485	0.678357
-484.96	-0.269479	-0.207581	0.688968	0.615135	-0.336776	-0.818538	0.0452426	-0.319207	0.428515	0.85098	-0.0123781	0.983825	-0.130231	-0.0146956	-0.56927	0.456605	0.160287	0.10169	-0.0742038	0.511166	0.252279	0.672205
-484.48	-0.346817	-0.187782	0.723558	0.658474	-0.322709	-0.896937	0.0667355	-0.320528	0.414549	0.869996	-0.00713336	0.9769	-0.141766	-0.0403782	-0.560436	0.438991	0.18476	0.0888629	-0.0497571	0.508385	0.233768	0.662561
-484	-0.409642	-0.180846	0.748409	0.683041	-0.309015	-0.968415	0.0786645	-0.317669	0.409507	0.887504	-0.0067143	0.801655	-0.148195	-0.053782	-0.57067	0.416494	0.208492	0.076327	-0.0203092	0.508553	0.21802	0.65199
-483.52	-0.451601	-0.179803	0.76413	0.674101	-0.29199	-1.01016	0.0831896	-0.316501	0.409868	0.896689	0.00543432	0.792451	-0.147792	-0.0546218	-0.590763	0.38793	0.232374	0.0633306	0.00849159	0.514837	0.205955	0.64062
-483.04	-0.474731	-0.175635	0.774365	0.634073	-0.263314	-1.00583	0.0853714	-0.321456	0.40836	0.890949	0.0364939	0.785399	-0.142071	-0.0507713	-0.610996	0.354858	0.260413	0.0503014	0.032509	0.528379	0.192653	0.627773
-482.56	-0.486842	-0.163954	0.786098	0.576393	-0.218993	-0.96253	0.0921807	-0.332807	0.401286	0.870094	0.0689948	0.789648	-0.131588	-0.0504969	-0.630655	0.324816	0.294307	0.0386597	0.0492003	0.546486	0.171808	0.612916
-482.08	-0.494642	-0.144658	0.800739	0.513632	-0.163477	-0.900082	0.106022	-0.345583	0.396903	0.836131	0.0850353	0.80868	-0.11778	-0.0545241	-0.654001	0.303076	0.331177	0.0311251	0.0590462	0.567113	0.141523	0.595495
-481.6	-0.508844	-0.123566	0.816593	0.457339	-0.108138	-0.831466	0.122053	-0.352721	0.397902	0.792238	0.0733493	0.835774	-0.102861	-0.0552898	-0.686786	0.292243	0.364717	0.0280946	0.0636109	0.589311	0.108423	0.575972
-481.12	-0.533386	-0.104964	0.832247	0.410581	-0.0629219	-0.764865	0.136942	-0.350794	0.408485	0.74347	0.0318449	0.851364	-0.0902691	-0.0422059	-0.726213	0.2855	0.388474	0.0285822	0.0648151	0.612139	0.0803358	0.557923
-480.64	-0.565132	-0.0923611	0.843025	0.376233	-0.0330509	-0.694468	0.142542	-0.339755	0.420294	0.691125	-0.030822	0.835816	-0.0832611	-0.00875998	-0.760481	0.280224	0.39921	0.0306726	0.063197	0.635646	0.0637443	0.542291
-480.16	-0.604731	-0.0870358	0.84807	0.357248	-0.017732	-0.619738	0.137398	-0.324955	0.42288	0.6349	-0.104443	0.786717	-0.0855889	0.0379848	-0.776281	0.268643	0.39903	0.0323327	0.059291	0.658343	0.0583764	0.531798
-479.68	-0.646336	-0.0859367	0.844858	0.34854	-0.0130675	-0.547303	0.12574	-0.312525	0.411493	0.574091	-0.176308	0.713132	-0.0961968	0.0814412	-0.77017	0.250797	0.392443	0.0350033	0.0521495	0.67992	0.0601932	0.526153
-479.2	-0.69051	-0.0866083	0.834032	0.345068	-0.0155533	-0.488706	0.109466	-0.305117	0.394662	0.510241	-0.245152	0.637757	-0.111078	0.107448	-0.753928	0.227875	0.382622	0.0410006	0.0422695	0.699577	0.0648936	0.527203
-478.72	-0.739263	-0.0868898	0.814612	0.336527	-0.0256575	-0.451506	0.0932335	-0.301063	0.382664	0.452256	-0.314679	0.5779	-0.124113	0.108903	-0.744963	0.20192	0.372149	0.0502287	0.0298372	0.716087	0.0726442	0.535901
-478.24	-0.794712	-0.0830474	0.787406	0.314113	-0.044527	-0.427916	0.0779513	-0.296624	0.383565	0.409418	-0.392404	0.541469	-0.130618	0.0920931	-0.754894	0.174843	0.363288	0.0625736	0.0171335	0.729917	0.0840807	0.552511
-477.76	-0.852697	-0.0745714	0.758232	0.273691	-0.0702066	-0.400212	0.0646557	-0.288249	0.392836	0.389312	-0.475603	0.526501	-0.132423	0.0660915	-0.782378	0.148734	0.356899	0.0750055	0.00506802	0.740729	0.0983547	0.612731
-477.28	-0.902343	-0.0648268	0.733882	0.221166	-0.0996848	-0.350626	0.0542029	-0.275313	0.394625	0.390877	-0.553628	0.521059	-0.134411	0.0428219	-0.813227	0.121442	0.354753	0.0856983	-0.00413963	0.747313	0.11023	0.641416
-476.8	-0.930466	-0.0548575	0.723131	0.170698	-0.127415	-0.276862	0.0464702	-0.261076	0.375589	0.403602	-0.611974	0.51628	-0.142447	0.0257061	-0.834097	0.0963217	0.358021	0.0960147	-0.0117815	0.749854	0.112671	0.669127
-476.32	-0.932227	-0.0485119	0.734133	0.127798	-0.150197	-0.196711	0.0417814	-0.249694	0.337482	0.413436	-0.638724	0.505177	-0.15588	0.014261	-0.843803	0.0747862	0.365488	0.107977	-0.0196656	0.752648	0.106005	0.690783
-475.84	-0.91807	-0.0462738	0.769105	0.0899511	-0.165618	-0.13318	0.0376315	-0.243358	0.296979	0.414121	-0.630484	0.485432	-0.168041	0.00988099	-0.849611	0.059074	0.374859	0.124858	-0.030613	0.760213	0.0949115	0.705366
-475.36	-0.90357	-0.0485637	0.816316	0.0493632	-0.174996	-0.0924225	0.032887	-0.241618	0.279977	0.407334	-0.596547	0.45714	-0.167881	0.0116012	-0.860021	0.0504364	0.384837	0.147629	-0.0458943	0.776334	0.0861883	0.714403
-474.88	-0.900101	-0.0527907	0.865657	0.000208337	-0.180331	-0.063401	0.0293691	-0.243101	0.297641	0.399888	-0.566475	0.421515	-0.148038	0.0203741	-0.87319	0.0457734	0.393072	0.175894	-0.0624227	0.801399	0.0828937	0.723051
-474.4	-0.906386	-0.05699	0.908191	-0.0535123	-0.184079	-0.0183747	0.0311084	-0.247265	0.346506	0.399365	-0.554826	0.380133	-0.108203	0.0328329	-0.875823	0.0388988	0.402098	0.208271	-0.0759866	0.829817	0.0865245	0.735369
-473.92	-0.901489	-0.0565509	0.940309	-0.106233	-0.190666	0.0686026	0.0445727	-0.254151	0.407527	0.402752	-0.575518	0.337212	-0.0567797	0.0454529	-0.853092	0.0236759	0.413713	0.244569	-0.0832179	0.855167	0.0904343	0.754217
-473.44	-0.862785	-0.0515306	0.964249	-0.155631	-0.200888	0.200843	0.0705783	-0.264819	0.462012	0.400698	-0.611814	0.295868	-0.00681263	0.0560319	-0.803379	-0.00398594	0.430474	0.284815	-0.08472	0.87303	0.0906943	0.777706
-472.96	-0.781942	-0.0415824	0.985035	-0.201852	-0.21556	0.357346	0.105728	-0.278176	0.504732	0.385503	-0.639465	0.258272	0.0307768	0.0657202	-0.740396	-0.037838	0.452104	0.32608	-0.0827321	0.884801	0.0871491	0.80149
-472.48	-0.664484	-0.0289997	1.00639	-0.252133	-0.231983	0.508847	0.140437	-0.290281	0.538229	0.360243	-0.639176	0.223609	0.0508162	0.0754923	-0.68271	-0.0719591	0.475303	0.365086	-0.0808225	0.893649	0.0820285	0.823042
-472	-0.531706	-0.0183322	1.0288	-0.308864	-0.24801	0.633525	0.165022	-0.297494	0.574443	0.33674	-0.603612	0.190512	0.0564761	0.0826614	-0.639977	-0.101372	0.496018	0.396669	-0.0820381	0.903905	0.0792097	0.841089
-471.52	-0.396521	-0.0136742	1.05168	-0.362324	-0.260306	0.725118	0.176363	-0.29842	0.615483	0.328954	-0.547726	0.15808	0.056629	0.0816806	-0.604493	-0.120508	0.509584	0.416281	-0.0852439	0.917633	0.0821265	0.85894
-471.04	-0.268844	-0.0143188	1.07169	-0.406281	-0.268886	0.792937	0.177739	-0.29794	0.655735	0.340266	-0.492166	0.129446	0.0599643	0.0682045	-0.560585	-0.12963	0.515302	0.422318	-0.0869625	0.933765	0.0893256	0.879849
-470.56	-0.149718	-0.0165003	1.08811	-0.441988	-0.276151	0.845629	0.178905	-0.301954	0.680975	0.362669	-0.455872	0.107077	0.0723724	0.0403222	-0.49645	-0.127848	0.514354	0.417436	-0.0870387	0.952099	0.0983922	0.904029
-470.08	-0.0311981	-0.0113055	1.0974	-0.472681	-0.287169	0.882891	0.186521	-0.315894	0.687176	0.38119	-0.456602	0.0909201	0.0938477	-0.000133486	-0.411683	-0.117233	0.510568	0.406375	-0.0848169	0.971335	0.110268	0.931004
-469.6	0.08343	0.00513374	1.09537	-0.511785	-0.300987	0.893855	0.202885	-0.338762	0.673969	0.383834	-0.501775	0.0804062	0.12002	-0.0452762	-0.317969	-0.100176	0.507086	0.396154	-0.0813263	0.992158	0.122531	0.956658
-469.12	0.189675	0.0308421	1.08508	-0.549664	-0.314351	0.859866	0.226087	-0.364123	0.650302	0.368865	-0.588949	0.0729841	0.144423	-0.0889953	-0.227721	-0.0810393	0.507093	0.391628	-0.0783058	1.01307	0.134144	0.976376
-468.64	0.284996	0.0604474	1.06834	-0.558942	-0.321266	0.774422	0.247201	-0.384221	0.622721	0.345923	-0.705808	0.0677439	0.159989	-0.127948	-0.143675	-0.0663139	0.513112	0.393085	-0.0753288	1.02843	0.142859	0.989906
-468.16	0.37566	0.0851348	1.0522	-0.517947	-0.319129	0.648471	0.261104	-0.396047	0.591946	0.326519	-0.82874	0.0658857	0.163727	-0.163576	-0.0605623	-0.0589215	0.526221	0.396774	-0.0718121	1.03522	0.146939	0.99784
-467.68	0.473147	0.100972	1.04627	-0.429211	-0.309614	0.503638	0.263767	-0.401492	0.561068	0.315245	-0.928474	0.0665401	0.156354	-0.197473	0.0251261	-0.056868	0.545848	0.396692	-0.0651601	1.03125	0.147883	1.00293
-467.2	0.583606	0.11074	1.05562	-0.333605	-0.299749	0.371149	0.257158	-0.405865	0.524451	0.309729	-0.98618	0.0636658	0.142706	-0.229646	0.109828	-0.055058	0.566215	0.387937	-0.0536567	1.01905	0.147278	1.00831
-466.72	0.697883	0.119508	1.07883	-0.277112	-0.294128	0.26663	0.24423	-0.412806	0.481441	0.299731	-1.00269	0.0478281	0.127915	-0.260313	0.182899	-0.0472166	0.580043	0.371923	-0.0350011	1.00291	0.145518	1.01389
-466.24	0.794458	0.135168	1.11283	-0.273857	-0.294642	0.198178	0.232109	-0.421777	0.436166	0.329599	-0.995287	0.012182	0.117315	-0.287392	0.235641	-0.0329394	0.580309	0.353198	-0.00900866	0.989315	0.144496	1.01727
-465.76	0.848106	0.155691	1.14993	-0.29307	-0.29862	0.159426	0.226316	-0.427841	0.392162	0.292218	-0.991009	-0.0417191	0.113368	-0.309274	0.267941	-0.0194407	0.564921	0.336179	0.0207493	0.979924	0.143594	1.01673
-465.28	0.849022	0.174143	1.18302	-0.278329	-0.301161	0.140842	0.230239	-0.426194	0.354638	0.249132	-1.00144	-0.0975593	0.114523	-0.324872	0.291	-0.016044	0.541088	0.322744	0.0502568	0.975031	0.140589	1.01223
-464.8	0.809335	0.183373	1.2096	-0.199041	-0.298008	0.135647	0.244677	-0.417046	0.32587	0.208131	-1.01892	-0.139032	0.118178	-0.331612	0.316627	-0.0265513	0.521739	0.31052	0.0742694	0.974388	0.136087	1.00455
-464.32	0.757196	0.181642	1.22632	-0.0848913	-0.2879	0.141609	0.269399	-0.404404	0.302282	0.175358	-1.02818	-0.155637	0.122363	-0.328552	0.349831	-0.0487962	0.520253	0.298653	0.090036	0.98082	0.128635	0.996125
-463.84	0.722316	0.173872	1.23099	0.00664985	-0.274049	0.15727	0.30215	-0.39306	0.281126	0.153152	-1.01505	-0.151866	0.127984	-0.319707	0.384329	-0.0744	0.544171	0.290172	0.0992977	0.985183	0.123885	0.989949
-463.36	0.713898	0.168604	1.22141	0.0432492	-0.266389	0.18091	0.344268	-0.38633	0.257767	0.140417	-0.982785	-0.14245	0.138516	-0.309956	0.411206	-0.0942241	0.589654	0.289895	0.105435	0.992684	0.120719	0.987288
-462.88	0.721373	0.167946	1.19617	0.0621272	-0.273163	0.202283	0.394256	-0.381699	0.232627	0.139954	-0.95364	-0.142991	0.155469	-0.304131	0.425056	-0.102708	0.645549	0.299035	0.111866	1.00053	0.11919	0.987609
-462.4	0.723827	0.17049	1.15727	0.154993	-0.299917	0.205403	0.448772	-0.375508	0.212838	0.154109	-0.948011	-0.158289	0.17518	-0.30492	0.430998	-0.0986884	0.699249	0.313308	0.120167	1.00447	0.115115	0.991456
-461.92	0.706572	0.166459	1.10702	0.39228	-0.344941	0.187749	0.502082	-0.364461	0.206544	0.182575	-0.972844	-0.183	0.189578	-0.310694	0.43808	-0.0814994	0.742337	0.322757	0.1258	1.00288	0.10425	0.999444
-461.44	0.666339	0.153427	1.05354	0.75142	-0.400419	0.155806	0.545208	-0.347825	0.217698	0.223063	-1.02146	-0.208814	0.192384	-0.314743	0.455356	-0.0517531	0.773306	0.31993	0.125114	0.999141	0.0833974	1.01314
-460.96	0.613967	0.134823	1.00055	1.11501	-0.453408	0.133952	0.570289	-0.329495	0.238117	0.26836	-1.07299	-0.225835	0.181716	-0.312751	0.486063	-0.0123349	0.796149	0.304724	0.115607	0.996579	0.0560437	1.03114
-460.48	0.564293	0.116633	0.954684	1.3462	-0.495278	0.140587	0.577175	-0.314604	0.252536	0.311978	-1.11492	-0.231992	0.1642	-0.303796	0.530773	0.0312107	0.814406	0.285692	0.0972655	1.00082	0.0279845	1.05085
-460	0.525321	0.107989	0.916042	1.38539	-0.521376	0.185257	0.573801	-0.304798	0.252371	0.35036	-1.1389	-0.224121	0.15133	-0.291283	0.585291	0.0714789	0.829084	0.274186	0.0741432	1.01016	0.00521885	1.06771
-459.52	0.500367	0.110255	0.884201	1.28244	-0.534457	0.254398	0.574673	-0.299689	0.240107	0.385038	-1.1508	-0.198783	0.150684	-0.278094	0.644597	0.103568	0.837349	0.272805	0.0490781	1.02204	-0.00953323	1.07914
-459.04	0.491624	0.117901	0.858597	1.16091	-0.539795	0.32302	0.586937	-0.295856	0.232455	0.415877	-1.14758	-0.151541	0.162166	-0.262571	0.704295	0.127329	0.8358	0.276883	0.0242894	1.03248	-0.0192018	1.08362
-458.56	0.504651	0.125009	0.84199	1.12232	-0.543161	0.362092	0.613715	-0.291173	0.244814	0.441972	-1.12152	-0.0855535	0.177613	-0.240739	0.760185	0.141994	0.823198	0.275331	-0.00108417	1.0395	-0.0266662	1.0825
-458.08	0.546225	0.129985	0.83646	1.18071	-0.548205	0.357544	0.6469	-0.285144	0.280855	0.457682	-1.07122	-0.0101665	0.184988	-0.207579	0.808648	0.151528	0.802696	0.262775	-0.0283601	1.04311	-0.0336718	1.07944
-457.6	0.617116	0.135647	0.845669	1.27508	-0.551374	0.318843	0.675182	-0.279065	0.325483	0.457526	-1.00665	0.0570855	0.175634	-0.162876	0.851762	0.154468	0.781514	0.242015	-0.0596557	1.04408	-0.037262	1.07561
-457.12	0.718337	0.145499	0.867216	1.32834	-0.548151	0.266451	0.690726	-0.274383	0.355059	0.438873	-0.945653	0.107081	0.151634	-0.113397	0.896304	0.147463	0.765418	0.22214	-0.0952705	1.04139	-0.0354223	1.07132
-456.64	0.839299	0.163448	0.893915	1.30744	-0.539344	0.219792	0.693549	-0.271449	0.360445	0.405248	-0.90977	0.135469	0.120382	-0.0701358	0.948377	0.131752	0.758851	0.21081	-0.136071	1.03294	-0.024668	1.06329
-456.16	0.964749	0.184229	0.914947	1.24564	-0.524327	0.186742	0.69181	-0.269276	0.35119	0.366295	-0.913798	0.151792	0.0928004	-0.0449875	1.0067	0.112548	0.762007	0.207437	-0.179608	1.01928	-0.0062253	1.0475
-455.68	1.08258	0.204643	0.919055	1.19855	-0.509014	0.158912	0.687811	-0.266069	0.351345	0.328676	-0.952073	0.169248	0.0741174	-0.0415762	1.06425	0.0993433	0.77195	0.20639	-0.22608	1.00189	0.015241	1.02143
-455.2	1.17646	0.222482	0.90426	1.19876	-0.459098	0.129778	0.68164	-0.260973	0.377829	0.294683	-1.0016	0.193167	0.0636067	-0.0536509	1.11215	0.0967165	0.783642	0.200471	-0.273913	0.984542	0.0349539	0.985162
-454.72	1.23665	0.238619	0.878197	1.24069	-0.460419	0.0938898	0.671651	-0.253878	0.424667	0.26033	-1.03619	0.221	0.0538267	-0.0657112	1.14095	0.102701	0.792445	0.187445	-0.322465	0.971228	0.0540419	0.941122
-454.24	1.25784	0.254242	0.851958	1.29552	-0.470667	0.0555953	0.655952	-0.246981	0.472137	0.223956	-1.03408	0.242529	0.0369064	-0.061767	1.15194	0.109912	0.796622	0.169634	-0.368418	0.962236	0.0757871	0.894212
-453.76	1.25258	0.270377	0.832037	1.33309	-0.483213	0.0308797	0.634494	-0.24178	0.49421	0.181224	-1.00303	0.250302	0.0101077	-0.0345319	1.15018	0.110824	0.795989	0.150892	-0.409907	0.956582	0.10281	0.850978
-453.28	1.2396	0.284031	0.819287	1.35326	-0.491797	0.0314237	0.608513	-0.238242	0.490703	0.137387	-0.955899	0.239396	-0.0243775	0.0120796	1.14217	0.103227	0.79449	0.133438	-0.444771	0.950839	0.131921	0.815402
-452.8	1.23102	0.289357	0.803596	1.3612	-0.492843	0.0512913	0.577778	-0.235537	0.479838	0.0957325	-0.914712	0.21267	-0.0600474	0.0665471	1.13299	0.0927565	0.797744	0.116148	-0.471979	0.942239	0.155521	0.790012
-452.32	1.24082	0.284357	0.779356	1.36495	-0.487166	0.0735155	0.539248	-0.231667	0.483851	0.057537	-0.894412	0.177995	-0.0900628	0.11995	1.12307	0.0888787	0.812149	0.0979621	-0.492767	0.92834	0.166845	0.773634
-451.84	1.26067	0.267563	0.743521	1.36314	-0.481193	0.0701761	0.487596	-0.224771	0.517087	0.0215962	-0.894405	0.141811	-0.110322	0.165997	1.11227	0.0988719	0.838885	0.0793679	-0.509628	0.909791	0.162979	0.761759
-451.36	1.27903	0.23895	0.702587	1.35688	-0.471171	0.0301059	0.421006	-0.214255	0.57078	-0.0134876	-0.913188	0.11171	-0.120638	0.205462	1.10292	0.118666	0.876401	0.0634497	-0.525469	0.889892	0.151762	0.752295
-450.88	1.28188	0.205763	0.670422	1.34668	-0.479418	-0.0404132	0.345034	-0.200846	0.628139	-0.0704963	-0.944366	0.0909987	-0.123771	0.238194	1.09637	0.142898	0.918005	0.0516154	-0.542886	0.872143	0.138467	0.745251
-450.4	1.26685	0.170182	0.657974	1.33403	-0.495089	-0.120613	0.269324	-0.186109	0.677037	-0.0970411	-0.985126	0.0765098	-0.122107	0.263219	1.09193	0.161195	0.957079	0.044859	-0.56163	0.859041	0.128164	0.743715
-449.92	1.24575	0.134467	0.667878	1.31965	-0.512681	-0.182666	0.201174	-0.172121	0.718781	-0.10631	-1.03224	0.0671415	-0.117387	0.275961	1.0857	0.165802	0.987779	0.0402872	-0.579938	0.850184	0.117895	0.752136
-449.44	1.2326	0.103354	0.694154	1.29897	-0.525021	-0.215694	0.146322	-0.160465	0.767148	-0.0966079	-1.07601	0.0559368	-0.109227	0.276752	1.07566	0.156186	1.00743	0.0370186	-0.597413	0.841115	0.100858	0.770707
-448.96	1.23707	0.0770453	0.723875	1.2685	-0.5309	-0.223133	0.0992805	-0.152459	0.825043	-0.0754412	-1.10131	0.042182	-0.0962096	0.271717	1.05852	0.136902	1.01468	0.0348322	-0.613888	0.828678	0.0780762	0.79438
-448.48	1.25901	0.0551214	0.746389	1.23161	-0.53215	-0.219656	0.0561114	-0.14673	0.8847	-0.0517886	-1.0878	0.0310149	-0.0790753	0.271798	1.03561	0.114218	1.00921	0.0346178	-0.629808	0.80877	0.0529498	0.81589
-448	1.29192	0.0379059	0.75521	1.19641	-0.531506	-0.218444	0.0107514	-0.141607	0.928173	-0.0297278	-1.03431	0.0335727	-0.0597439	0.2851	1.00631	0.0955432	0.992682	0.0379325	-0.643226	0.782765	0.0397353	0.83011
-447.52	1.32614	0.0242979	0.748287	1.173	-0.531441	-0.216547	-0.0340063	-0.134225	0.944563	-0.00459177	-0.955755	0.0526424	-0.0414377	0.314031	0.971188	0.0827936	0.968487	0.0450359	-0.650115	0.757234	0.0491961	0.838024
-447.04	1.36244	0.010918	0.729299	1.16179	-0.529293	-0.206568	-0.073629	-0.130036	0.934356	0.0290447	-0.879394	0.0858141	-0.0253914	0.35245	0.928577	0.0781967	0.94095	0.0546495	-0.645187	0.737576	0.0824274	0.844237
-446.56	1.408	-0.00525338	0.685731	1.15289	-0.520023	-0.173554	-0.10332	-0.116914	0.908388	0.0703434	-0.829839	0.121137	-0.0101002	0.390645	0.880263	0.0816799	0.915498	0.0644982	-0.62857	0.727122	0.128117	0.85131
-446.08	1.46795	-0.0271333	0.654533	1.13735	-0.501912	-0.115492	-0.120749	-0.100297	0.877039	0.112457	-0.813508	0.143958	0.00604536	0.423396	0.834883	0.0892387	0.896377	0.0726989	-0.602755	0.722413	0.171995	0.857065
-445.6	1.54271	-0.0575799	0.624323	1.10761	-0.476978	-0.0345776	-0.128092	-0.0815652	0.841944	0.147908	-0.815792	0.148622	0.0260067	0.448394	0.797902	0.102963	0.882889	0.0787538	-0.575752	0.718513	0.200702	0.857078
-445.12	1.61743	-0.0914315	0.597759	1.07021	-0.451607	0.059537	-0.128497	-0.0629128	0.799368	0.173364	-0.820051	0.139384	0.0528324	0.467721	0.772844	0.122159	0.872576	0.0826891	-0.554648	0.709244	0.213148	0.848134
-444.64	1.68108	-0.122616	0.576712	1.0361	-0.430547	0.163061	-0.125657	-0.0460662	0.750137	0.194873	-0.804438	0.127308	0.086759	0.48251	0.752838	0.14843	0.863776	0.087718	-0.541495	0.694403	0.213373	0.832881
-444.16	1.72408	-0.143697	0.5625	1.01195	-0.41435	0.274455	-0.123638	-0.0326455	0.70026	0.219646	-0.76917	0.120695	0.125901	0.492277	0.726123	0.180486	0.85578	0.0964904	-0.532376	0.676727	0.211032	0.820255
-443.68	1.75299	-0.149647	0.553961	0.992535	-0.401083	0.394649	-0.121621	-0.0245711	0.653637	0.248237	-0.720454	0.120338	0.164915	0.493891	0.686901	0.210847	0.852245	0.112738	-0.522509	0.659256	0.214308	0.817417
-443.2	1.78337	-0.139657	0.549481	0.968735	-0.386286	0.514799	-0.117252	-0.0235857	0.612681	0.273738	-0.67365	0.121774	0.197311	0.488022	0.638455	0.235666	0.856381	0.135495	-0.509325	0.643512	0.224297	0.826154
-442.72	1.82918	-0.115609	0.54814	0.939432	-0.367915	0.619341	-0.109571	-0.0304348	0.565474	0.287374	-0.635402	0.119543	0.219961	0.476969	0.595701	0.249734	0.869207	0.159885	-0.494062	0.627854	0.237985	0.840331
-442.24	1.89485	-0.0841288	0.547345	0.908912	-0.351585	0.681231	-0.0969141	-0.0439992	0.499264	0.285694	-0.606688	0.115692	0.236367	0.4643	0.572239	0.251886	0.88544	0.177137	-0.480151	0.609356	0.246729	0.852277
-441.76	1.96636	-0.0521158	0.546532	0.889889	-0.340139	0.685995	-0.0821773	-0.0622426	0.414691	0.275716	-0.585092	0.117869	0.254162	0.451685	0.569887	0.243213	0.896526	0.179945	-0.470717	0.588193	0.245531	0.85661
-441.28	2.02662	-0.0265968	0.545318	0.896846	-0.337554	0.63576	-0.0673962	-0.0810315	0.320299	0.268293	-0.569217	0.137631	0.280094	0.434822	0.58051	0.22695	0.896748	0.167571	-0.463357	0.565823	0.230953	0.857785
-440.8	2.06541	-0.0140488	0.542913	0.932719	-0.342869	0.556599	-0.0581722	-0.0975277	0.236575	0.27191	-0.560906	0.181266	0.314745	0.412573	0.588416	0.209073	0.88235	0.145658	-0.454821	0.543316	0.200441	0.863434
-440.32	2.07862	-0.0144144	0.536028	0.986153	-0.354219	0.483565	-0.0494415	-0.111275	0.184589	0.286975	-0.557951	0.242807	0.347963	0.383081	0.58346	0.192433	0.856624	0.12461	-0.442522	0.523194	0.157663	0.878986
-439.84	2.07367	-0.0256958	0.522964	1.04238	-0.367499	0.446609	-0.0347997	-0.121825	0.168167	0.308985	-0.557045	0.307782	0.364818	0.349739	0.56842	0.182981	0.824086	0.113468	-0.427622	0.505923	0.105746	0.903863
-439.36	2.05586	-0.0411032	0.502071	1.0869	-0.384459	0.454241	-0.00863141	-0.128357	0.18218	0.333633	-0.549938	0.361705	0.354996	0.317855	0.552517	0.182869	0.790768	0.116338	-0.413252	0.492549	0.0536347	0.932444
-438.88	2.0211	-0.05551	0.477324	1.11627	-0.408274	0.491184	0.0294524	-0.130238	0.211182	0.362725	-0.52946	0.395267	0.32162	0.292978	0.544292	0.193386	0.758409	0.132934	-0.401128	0.487229	0.00594248	0.95876
-438.4	1.9597	-0.0641901	0.455293	1.13597	-0.441291	0.534225	0.074045	-0.128003	0.234382	0.399666	-0.492383	0.413094	0.27714	0.278444	0.542626	0.206873	0.729083	0.158195	-0.389816	0.494135	-0.0321796	0.978974
-437.92	1.86533	-0.0683124	0.447377	1.15284	-0.484486	0.562391	0.11482	-0.125898	0.237026	0.445758	-0.440607	0.426602	0.235956	0.268377	0.537947	0.214416	0.704921	0.187748	-0.374844	0.516406	-0.0587338	0.994297
-437.44	1.74018	-0.0710303	0.456647	1.17784	-0.533916	0.563016	0.147107	-0.128738	0.213296	0.497682	-0.386989	0.448638	0.205944	0.252757	0.521366	0.209593	0.689852	0.21759	-0.354276	0.556657	-0.0755174	1.00842
-436.96	1.60388	-0.0715263	0.480563	1.21695	-0.581266	0.537108	0.177941	-0.138846	0.167039	0.547009	-0.343906	0.484093	0.185133	0.223641	0.491548	0.188834	0.686879	0.245774	-0.329093	0.592323	-0.0862131	1.02235
-436.48	1.47787	-0.0701872	0.510777	1.26722	-0.616732	0.483203	0.217704	-0.153879	0.109113	0.588511	-0.321445	0.527377	0.167258	0.178881	0.454898	0.157324	0.695207	0.269559	-0.305028	0.625037	-0.0932702	1.03662
-436	1.37833	-0.0660217	0.535758	1.32237	-0.634983	0.404041	0.276103	-0.166086	0.0625009	0.625112	-0.32441	0.567075	0.149917	0.126512	0.42132	0.1204	0.709255	0.287931	-0.288213	0.651537	-0.100043	1.04818
-435.52	1.31059	-0.0630565	0.549425	1.37494	-0.636953	0.30619	0.35036	-0.169093	0.0434697	0.664245	-0.346167	0.593006	0.134056	0.0800597	0.396092	0.0869761	0.721936	0.297989	-0.281158	0.672671	-0.108509	1.05396
-435.04	1.26858	-0.0685161	0.550146	1.41445	-0.631325	0.200512	0.427691	-0.161607	0.0565036	0.708743	-0.376621	0.603422	0.120334	0.0531351	0.378271	0.0626064	0.728415	0.300004	-0.282753	0.691169	-0.116184	1.05238
-434.56	1.24389	-0.0907327	0.541338	1.43917	-0.630355	0.105596	0.491935	-0.150389	0.0954151	0.757138	-0.401381	0.603646	0.104594	0.0513744	0.361263	0.0478977	0.731042	0.293725	-0.288169	0.709691	-0.117918	1.04615
-434.08	1.22635	-0.129936	0.523776	1.44534	-0.642864	0.0434942	0.531756	-0.143364	0.144015	0.802869	-0.409191	0.597406	0.082797	0.0709289	0.341469	0.0413104	0.737492	0.279857	-0.294118	0.72768	-0.11288	1.03921
-433.6	1.21326	-0.179049	0.497256	1.44038	-0.671536	0.0242818	0.549906	-0.14515	0.194635	0.837339	-0.391843	0.588599	0.0617345	0.0997316	0.318849	0.041882	0.75693	0.26102	-0.299257	0.743463	-0.0973973	1.03729
-433.12	1.19306	-0.222633	0.459086	1.43468	-0.709596	0.0508718	0.556353	-0.151231	0.246324	0.858979	-0.343499	0.574302	0.0574115	0.126056	0.295692	0.0484371	0.794016	0.241924	-0.304621	0.755229	-0.0717768	1.04241
-432.64	1.16231	-0.249022	0.406133	1.43874	-0.747781	0.101915	0.563486	-0.154973	0.306491	0.87348	-0.265589	0.552031	0.0897162	0.144269	0.277813	0.0595924	0.844499	0.22664	-0.309589	0.755232	-0.0415514	1.05307
-432.16	1.11919	-0.255356	0.343262	1.46057	-0.77864	0.154011	0.574212	-0.151948	0.379476	0.888942	-0.163329	0.526655	0.163087	0.152258	0.264895	0.0720795	0.898657	0.218894	-0.313674	0.760213	-0.01323	1.06309
-431.68	1.07311	-0.248018	0.277476	1.49724	-0.800768	0.186584	0.58449	-0.144933	0.455497	0.909963	-0.0543339	0.508682	0.259259	0.152858	0.256526	0.0866746	0.943808	0.219927	-0.313937	0.761338	0.00741249	1.06501
-431.2	1.03482	-0.23647	0.216846	1.54362	-0.818077	0.186419	0.586797	-0.140345	0.519371	0.936757	0.0344497	0.510341	0.340908	0.145508	0.250707	0.103667	0.973386	0.225851	-0.309992	0.759584	0.0160232	1.05338
-430.72	1.01277	-0.229427	0.16405	1.58617	-0.834455	0.158641	0.577698	-0.140519	0.55524	0.964953	0.0759865	0.533371	0.37843	0.13219	0.249795	0.120014	0.991002	0.231883	-0.302701	0.757317	0.0139898	1.03089
-430.24	1.00039	-0.229358	0.117036	1.61905	-0.852865	0.107084	0.559739	-0.140681	0.556387	0.989272	0.0585236	0.566945	0.365776	0.112042	0.253397	0.135768	1.00461	0.235242	-0.294143	0.755922	0.00658872	1.00642
-429.76	0.985548	-0.234976	0.0725366	1.63952	-0.87221	0.0385542	0.540284	-0.133156	0.531781	1.0097	-0.00660551	0.590898	0.325977	0.0877265	0.25902	0.14912	1.02376	0.235006	-0.28519	0.759903	0.000487859	0.990442
-429.28	0.951432	-0.247009	0.0301788	1.65461	-0.888605	-0.0429534	0.525097	-0.116355	0.493436	1.03023	-0.089267	0.586613	0.293337	0.0618324	0.264696	0.154455	1.05311	0.233216	-0.274254	0.771297	-0.00121077	0.988681
-428.8	0.894982	-0.266757	-0.00449984	1.66418	-0.89933	-0.134596	0.518418	-0.097633	0.4511	1.05545	-0.154096	0.552445	0.287351	0.0327596	0.266912	0.152263	1.08836	0.232923	-0.258943	0.787939	0.00197978	0.998519
-428.32	0.827865	-0.293533	-0.0283285	1.67504	-0.900439	-0.231679	0.515322	-0.0876801	0.408695	1.08738	-0.186825	0.499058	0.304016	-0.00483026	0.263368	0.144588	1.11936	0.234505	-0.238376	0.807974	0.00947885	1.01194
-427.84	0.772953	-0.318912	-0.0379915	1.68256	-0.890467	-0.317356	0.511424	-0.0905486	0.360702	1.12543	-0.193704	0.445522	0.322226	-0.058271	0.258908	0.134635	1.13402	0.234817	-0.214871	0.827818	0.0242743	1.01939
-427.36	0.744654	-0.333802	-0.0367606	1.68223	-0.87197	-0.377853	0.505931	-0.0964039	0.309155	1.16565	-0.19652	0.407621	0.323701	-0.129078	0.258914	0.127307	1.12636	0.228268	-0.193885	0.84723	0.0478272	1.01685
-426.88	0.746828	-0.332758	-0.0242756	1.66898	-0.848289	-0.398858	0.502132	-0.0890427	0.258314	1.20603	-0.209651	0.389411	0.306732	-0.209624	0.268576	0.123916	1.10169	0.212121	-0.179911	0.86814	0.0786136	1.00658
-426.4	0.766259	-0.318068	-0.00646869	1.6465	-0.827766	-0.380549	0.506351	-0.0594743	0.210197	1.24237	-0.234126	0.384862	0.28588	-0.284348	0.286905	0.120897	1.07225	0.188601	-0.175571	0.891319	0.111916	0.994991
-425.92	0.778757	-0.299432	0.0129046	1.62248	-0.817203	-0.326368	0.52232	-0.0149182	0.166584	1.27268	-0.255499	0.385717	0.276332	-0.339993	0.308567	0.113122	1.04937	0.163253	-0.178246	0.915739	0.136735	0.986615
-425.44	0.765213	-0.289724	0.0300618	1.61134	-0.821794	-0.249597	0.547344	0.022857	0.120374	1.29279	-0.263397	0.387132	0.283408	-0.375674	0.32461	0.0963224	1.03804	0.141694	-0.184018	0.935926	0.145964	0.982612
-424.96	0.716219	-0.292296	0.0440592	1.62338	-0.839889	-0.164683	0.571971	0.032457	0.0604127	1.30125	-0.259279	0.385939	0.299147	-0.399503	0.329711	0.068396	1.03501	0.127556	-0.189855	0.948078	0.13965	0.97861
-424.48	0.634534	-0.303055	0.0523985	1.6528	-0.868808	-0.0810221	0.588743	0.00764092	-0.0194424	1.29858	-0.25373	0.379906	0.30937	-0.422786	0.324715	0.0323992	1.0329	0.116314	-0.195614	0.947595	0.126157	0.971561
-424	0.534218	-0.308265	0.0554535	1.69117	-0.901509	-0.00847217	0.598408	-0.0386283	-0.115069	1.25317	-0.255972	0.365751	0.305369	-0.449768	0.313289	-0.00437701	1.02662	0.104311	-0.203471	0.936133	0.116343	0.961166
-423.52	0.43263	-0.297021	0.0579365	1.72073	-0.935248	0.0425308	0.607714	-0.0841946	-0.213347	1.23962	-0.269137	0.340638	0.28953	-0.475046	0.299754	-0.0355468	1.01816	0.0862833	-0.213452	0.919276	0.116746	0.950014
-423.04	0.352079	-0.266547	0.0668074	1.72881	-0.966416	0.0642595	0.628952	-0.112854	-0.29654	1.23348	-0.287803	0.30401	0.269929	-0.488659	0.286712	-0.0542379	1.01485	0.0592564	-0.225217	0.903574	0.124716	0.941817
-422.56	0.307485	-0.225967	0.0880506	1.71229	-0.991574	0.0484021	0.662716	-0.121408	-0.353866	1.24001	-0.302121	0.262767	0.255666	-0.486398	0.271883	-0.0626446	1.02109	0.0230395	-0.234747	0.893016	0.135475	0.937448
-422.08	0.300888	-0.185712	0.120846	1.67802	-1.00811	-0.00378212	0.70456	-0.118771	-0.382085	1.25804	-0.317466	0.224362	0.250566	-0.475696	0.254763	-0.0666008	1.03477	-0.0210391	-0.237237	0.888392	0.141416	0.936245
-421.6	0.320691	-0.158432	0.154439	1.63302	-1.01517	-0.0897941	0.740673	-0.114608	-0.385968	1.27987	-0.339026	0.193017	0.251041	-0.46705	0.236115	-0.0722084	1.04965	-0.0709035	-0.229672	0.888295	0.141874	0.934026
-421.12	0.347998	-0.142119	0.176909	1.58276	-1.01329	-0.193251	0.756946	-0.112405	-0.37212	1.29624	-0.377926	0.1667	0.250696	-0.465099	0.218815	-0.0817845	1.05768	-0.123065	-0.215101	0.890514	0.141341	0.929768
-420.64	0.367026	-0.131499	0.176144	1.525	-1.00802	-0.3031	0.748116	-0.110307	-0.342397	1.29994	-0.429771	0.142922	0.24582	-0.46268	0.208017	-0.092122	1.05646	-0.172746	-0.199496	0.892254	0.143543	0.924778
-420.16	0.372784	-0.116293	0.151682	1.46541	-1.00655	-0.40555	0.720349	-0.105713	-0.300476	1.28813	-0.47403	0.123136	0.235077	-0.445938	0.201578	-0.0959342	1.04983	-0.214815	-0.1905	0.892966	0.147008	0.918857
-419.68	0.374429	-0.093642	0.112803	1.40236	-1.01047	-0.497754	0.684406	-0.0990478	-0.250702	1.26322	-0.490981	0.112026	0.221836	-0.405537	0.19454	-0.0906559	1.04139	-0.244219	-0.191282	0.890431	0.145631	0.914092
-419.2	0.377452	-0.0655373	0.0743954	1.34259	-1.01728	-0.575695	0.649661	-0.0934599	-0.203031	1.23483	-0.469003	0.118659	0.212567	-0.345622	0.180514	-0.0783207	1.03358	-0.261005	-0.199222	0.883339	0.135961	0.91064
-418.72	0.385444	-0.0379858	0.0463296	1.28652	-1.01892	-0.638245	0.620238	-0.090718	-0.166486	1.21038	-0.420083	0.147775	0.212858	-0.283674	0.158098	-0.0645479	1.02461	-0.268201	-0.206964	0.871119	0.115093	0.907352
-418.24	0.393392	-0.0162337	0.034592	1.23322	-1.01187	-0.68551	0.594066	-0.0886329	-0.148994	1.1932	-0.366585	0.196219	0.225589	-0.23808	0.132454	-0.0552888	1.01212	-0.272884	-0.208242	0.854487	0.0895605	0.904027
-417.76	0.39732	0.00176311	0.0362746	1.18076	-0.997503	-0.713472	0.570678	-0.0844645	-0.150097	1.17974	-0.332049	0.25509	0.248102	-0.216888	0.114288	-0.0526103	0.99462	-0.278887	-0.201021	0.834667	0.0657212	0.899988
-417.28	0.395619	0.0223052	0.048112	1.13146	-0.98187	-0.730012	0.552409	-0.0770282	-0.161112	1.16178	-0.324644	0.316056	0.273236	-0.212532	0.110074	-0.0553827	0.976069	-0.288611	-0.188407	0.814183	0.0495656	0.895698
-416.8	0.396267	0.052869	0.0685558	1.0921	-0.974179	-0.746578	0.54528	-0.0693701	-0.172756	1.13196	-0.341593	0.373317	0.292108	-0.212965	0.12124	-0.0606617	0.960197	-0.301386	-0.176571	0.794887	0.0424848	0.889646
-416.32	0.405217	0.0942774	0.097684	1.07019	-0.97323	-0.773612	0.553458	-0.0687983	-0.179957	1.0896	-0.366575	0.423594	0.299525	-0.208222	0.13986	-0.0640883	0.949334	-0.315018	-0.169039	0.77847	0.0411508	0.880897
-415.84	0.426853	0.143387	0.133961	1.07313	-0.971126	-0.817889	0.572535	-0.0793433	-0.178311	1.04015	-0.382777	0.463167	0.297288	-0.199861	0.174673	-0.0668309	0.943082	-0.326212	-0.163811	0.766593	0.0405304	0.868549
-415.36	0.451045	0.192596	0.174101	1.09778	-0.956842	-0.874895	0.59401	-0.0994029	-0.165071	0.995769	-0.385364	0.485976	0.292212	-0.194075	0.169383	-0.0652763	0.939839	-0.333922	-0.156089	0.759819	0.0351743	0.854698
-414.88	0.464212	0.236677	0.212676	1.13138	-0.924704	-0.93066	0.607164	-0.122905	-0.133284	0.962176	-0.373701	0.486395	0.291302	-0.196566	0.146904	-0.0578945	0.937063	-0.337595	-0.141223	0.757734	0.0251936	0.843305
-414.4	0.45755	0.273816	0.246058	1.16303	-0.876957	-0.967232	0.604682	-0.141415	-0.0797144	0.939078	-0.35196	0.471005	0.299054	-0.205266	0.112733	-0.042591	0.934252	-0.336972	-0.119614	0.757383	0.0110098	0.837663
-413.92	0.434788	0.303426	0.270511	1.18164	-0.82282	-0.975082	0.587564	-0.150094	-0.00454105	0.913155	-0.323232	0.453425	0.313402	-0.21218	0.0710118	-0.018698	0.93088	-0.332582	-0.0958624	0.755516	-0.00518134	0.837873
-413.44	0.409764	0.327129	0.286403	1.18632	-0.770131	-0.954908	0.562796	-0.148859	0.0806245	0.872095	-0.288845	0.449043	0.329625	-0.211219	0.0251076	0.0103512	0.925767	-0.326525	-0.0746934	0.749116	-0.0203309	0.841168
-412.96	0.401029	0.345276	0.291794	1.17507	-0.72358	-0.913816	0.538611	-0.142359	0.163388	0.808186	-0.250291	0.466662	0.342011	-0.20088	-0.0237464	0.0407284	0.915997	-0.323119	-0.0583184	0.739106	-0.0337314	0.843225
-412.48	0.418502	0.357819	0.286247	1.145	-0.685042	-0.864475	0.51784	-0.136208	0.237558	0.73043	-0.212971	0.501136	0.348944	-0.185666	-0.0754195	0.0690814	0.902545	-0.325151	-0.0455842	0.728866	-0.0430858	0.839693
-412	0.45092	0.365496	0.269988	1.09736	-0.657003	-0.821812	0.504619	-0.134129	0.3088	0.654124	-0.186139	0.538741	0.352239	-0.171593	-0.124961	0.0918002	0.88875	-0.333952	-0.0324701	0.723716	-0.0490201	0.830854
-411.52	0.483287	0.369296	0.252989	1.03225	-0.640419	-0.802636	0.50029	-0.136001	0.383904	0.594908	-0.179251	0.566943	0.354846	-0.163845	-0.166192	0.110208	0.881241	-0.346379	-0.0160215	0.725211	-0.0497549	0.819017
-411.04	0.500857	0.374204	0.241797	0.964652	-0.634438	-0.820962	0.508377	-0.139593	0.46762	0.558338	-0.192765	0.579457	0.356905	-0.163916	-0.197052	0.122585	0.883676	-0.356333	0.00403872	0.731971	-0.0446865	0.806899
-410.56	0.492308	0.385133	0.244533	0.910752	-0.634963	-0.883019	0.529737	-0.142123	0.550839	0.539631	-0.223185	0.583834	0.356333	-0.169072	-0.216404	0.13043	0.894384	-0.358185	0.0254025	0.741061	-0.0315044	0.795547
-410.08	0.457178	0.406968	0.261389	0.883943	-0.631582	-0.979099	0.565841	-0.144022	0.618794	0.524195	-0.252984	0.584922	0.347107	-0.175447	-0.232218	0.137512	0.908814	-0.352209	0.0460576	0.748064	-0.0119719	0.786059
-409.6	0.397453	0.43935	0.284747	0.875777	-0.619662	-1.0882	0.609028	-0.149272	0.661868	0.500581	-0.264224	0.587363	0.32802	-0.176918	-0.250969	0.148746	0.920392	-0.342479	0.0641592	0.752579	0.0092683	0.778302
-409.12	0.326953	0.477681	0.30296	0.871614	-0.600663	-1.18285	0.651145	-0.16308	0.68223	0.468779	-0.248001	0.592007	0.300934	-0.167447	-0.278795	0.169857	0.929266	-0.338033	0.0765667	0.756891	0.0300672	0.771076
-408.64	0.259938	0.5149	0.309087	0.85498	-0.582183	-1.24478	0.682535	-0.187722	0.696704	0.434736	-0.206764	0.595485	0.272604	-0.144357	-0.313701	0.203042	0.939074	-0.343589	0.0794133	0.763485	0.0493819	0.763149
-408.16	0.214686	0.540574	0.302349	0.822586	-0.573251	-1.26503	0.701234	-0.220702	0.724915	0.406868	-0.154637	0.600896	0.251375	-0.109349	-0.349153	0.24864	0.95509	-0.357882	0.0701173	0.773008	0.0740878	0.75305
-407.68	0.206047	0.549867	0.288846	0.785115	-0.576497	-1.24293	0.710215	-0.254711	0.772973	0.385636	-0.116362	0.61411	0.241142	-0.0696576	-0.376556	0.305703	0.975567	-0.374288	0.0491278	0.783201	0.106944	0.739977
-407.2	0.238268	0.543632	0.275171	0.764307	-0.583957	-1.18071	0.714903	-0.28033	0.835193	0.36444	-0.111512	0.638097	0.241171	-0.0380847	-0.3931	0.377655	0.994103	-0.385072	0.022573	0.791881	0.15052	0.721434
-406.72	0.301532	0.527422	0.263326	0.764769	-0.585477	-1.08151	0.723816	-0.291168	0.900664	0.333249	-0.142245	0.669097	0.247588	-0.0229548	-0.404383	0.46756	1.00146	-0.385244	-0.00155974	0.795806	0.196815	0.69924
-406.24	0.372994	0.50537	0.251293	0.782072	-0.574485	-0.954943	0.740762	-0.287272	0.961117	0.288387	-0.202319	0.693242	0.254485	-0.0282578	-0.420209	0.57172	0.994483	-0.375546	-0.0166197	0.796822	0.235347	0.677361
-405.76	0.432761	0.480446	0.233473	0.794611	-0.555325	-0.824475	0.767508	-0.273048	1.02223	0.233683	-0.277396	0.699159	0.256212	-0.0504751	-0.449301	0.679681	0.977644	-0.362234	-0.0193547	0.798337	0.260465	0.659387
-405.28	0.473946	0.453307	0.21214	0.780967	-0.536507	-0.726769	0.800426	-0.255461	1.09094	0.182293	-0.353547	0.68251	0.249408	-0.0809357	-0.492363	0.769691	0.962265	-0.349914	-0.0115719	0.804462	0.276265	0.649905
-404.8	0.499737	0.425043	0.191871	0.740893	-0.524052	-0.687856	0.834343	-0.237422	1.17163	0.148028	-0.426098	0.652347	0.230458	-0.110301	-0.541412	0.821761	0.955104	-0.340709	0.000276959	0.81851	0.297543	0.649383
-404.32	0.51857	0.400114	0.180828	0.684684	-0.522457	-0.714132	0.862339	-0.217957	1.26179	0.137935	-0.49635	0.624992	0.199498	-0.135703	-0.587943	0.834504	0.955724	-0.335014	0.0110855	0.837429	0.337147	0.656075
-403.84	0.532997	0.382393	0.182135	0.634295	-0.525608	-0.773595	0.882814	-0.19398	1.35569	0.147835	-0.566568	0.613341	0.161256	-0.158752	-0.623593	0.82155	0.956388	-0.332559	0.0172485	0.858162	0.396979	0.666999
-403.36	0.541963	0.371852	0.18948	0.599821	-0.528703	-0.822605	0.892871	-0.164665	1.44649	0.1683	-0.631949	0.619871	0.122823	-0.182512	-0.647909	0.809074	0.950069	-0.334599	0.0185521	0.876346	0.468224	0.679122
-402.88	0.543967	0.363418	0.195868	0.585652	-0.528256	-0.829246	0.893414	-0.1326	1.53854	0.189484	-0.691896	0.636232	0.0936088	-0.207692	-0.664058	0.812489	0.936374	-0.343177	0.0161666	0.888506	0.533881	0.688639
-402.4	0.539288	0.349487	0.195844	0.582504	-0.523083	-0.793236	0.886698	-0.104871	1.63592	0.20641	-0.74613	0.649711	0.0794464	-0.230155	-0.675492	0.830468	0.922253	-0.358467	0.0111079	0.893594	0.582675	0.694777
-401.92	0.536402	0.326265	0.189655	0.5929	-0.520575	-0.747431	0.876062	-0.0872555	1.74266	0.219488	-0.799901	0.65071	0.0814556	-0.24324	-0.680803	0.846118	0.915851	-0.377332	0.00270854	0.891543	0.613727	0.697405
-401.44	0.5489	0.298763	0.184811	0.619727	-0.521632	-0.735399	0.862326	-0.0797363	1.86093	0.231245	-0.848304	0.634781	0.094662	-0.24264	-0.675659	0.839082	0.921329	-0.394559	-0.0102868	0.883544	0.634452	0.698413
-400.96	0.573268	0.275498	0.18662	0.66884	-0.525836	-0.777859	0.846441	-0.0757232	1.98358	0.244815	-0.891517	0.604162	0.111606	-0.232156	-0.653313	0.805938	0.936463	-0.407209	-0.0289949	0.871313	0.651086	0.700913
-400.48	0.596974	0.266532	0.195295	0.732429	-0.528715	-0.864366	0.828628	-0.0667269	2.09942	0.258423	-0.917419	0.560466	0.126617	-0.216887	-0.617549	0.760114	0.952127	-0.414607	-0.0522513	0.857274	0.666366	0.705869
-400	0.605965	0.27167	0.204094	0.803648	-0.525544	-0.95848	0.814332	-0.0494658	2.1985	0.270581	-0.919246	0.508802	0.136695	-0.205166	-0.575106	0.718795	0.962471	-0.419504	-0.0784933	0.845923	0.677481	0.712234
-399.52	0.591521	0.281516	0.202023	0.868595	-0.513753	-1.02366	0.803697	-0.0260908	2.27004	0.255841	-0.900623	0.451372	0.143348	-0.199534	-0.539751	0.694141	0.966473	-0.422224	-0.104882	0.84055	0.680606	0.71838
-399.04	0.563111	0.283282	0.185467	0.921489	-0.494456	-1.04842	0.797562	-0.0046389	2.31489	0.274371	-0.877851	0.394602	0.15006	-0.197051	-0.519977	0.682647	0.965944	-0.422468	-0.129227	0.845713	0.680792	0.720211
-398.56	0.542491	0.268019	0.157901	0.967787	-0.469994	-1.04067	0.793929	0.0091672	2.33441	0.302492	-0.875689	0.342638	0.16148	-0.198216	-0.5178	0.672207	0.964256	-0.416709	-0.151556	0.861318	0.686831	0.716606
-398.08	0.543706	0.23627	0.128813	1.02115	-0.445854	-1.01944	0.790155	0.015071	2.33963	0.337732	-0.907532	0.298191	0.179047	-0.205432	-0.525333	0.650499	0.96193	-0.400953	-0.172068	0.883966	0.701561	0.708564
-397.6	0.566632	0.19993	0.105669	1.09042	-0.426412	-1.00591	0.784858	0.0190734	2.32983	0.371638	-0.96641	0.259496	0.203877	-0.224029	-0.53084	0.612243	0.957893	-0.375676	-0.192855	0.908926	0.720166	0.6963
-397.12	0.596945	0.168022	0.0917082	1.1671	-0.410075	-1.00613	0.778639	0.0267949	2.3043	0.390981	-1.03222	0.222644	0.232977	-0.257458	-0.527008	0.561582	0.952159	-0.345795	-0.215341	0.933051	0.733703	0.678973
-396.64	0.612365	0.148092	0.076405	1.23228	-0.394493	-1.01514	0.775727	0.0388956	2.26266	0.38596	-1.07772	0.182901	0.262674	-0.300483	-0.512474	0.507207	0.943889	-0.319762	-0.241169	0.952554	0.737875	0.65423
-396.16	0.602526	0.138724	0.0487474	1.26416	-0.376477	-1.0255	0.774812	0.0500309	2.20138	0.357042	-1.0828	0.14247	0.289764	-0.341315	-0.493573	0.454157	0.932056	-0.30543	-0.270399	0.96864	0.741434	0.621653
-395.68	0.569697	0.135555	0.00288722	1.25462	-0.356021	-1.03548	0.758722	0.0548314	2.12172	0.311203	-1.04559	0.106499	0.31234	-0.369089	-0.480474	0.404636	0.915487	-0.306712	-0.299908	0.980824	0.760238	0.583733
-395.2	0.528017	0.134888	-0.0597871	1.21064	-0.335047	-1.04174	0.751841	0.0526129	2.03003	0.262852	-0.975982	0.079954	0.331077	-0.381597	-0.476932	0.357411	0.891674	-0.322272	-0.326435	0.98961	0.810912	0.546169
-394.72	0.495847	0.137169	-0.130286	1.14971	-0.319038	-1.04494	0.740717	0.0497901	1.93314	0.22411	-0.891047	0.065089	0.347207	-0.386979	-0.484719	0.314038	0.860282	-0.346056	-0.346519	0.995498	0.894225	0.515809
-394.24	0.476839	0.144527	-0.195486	1.08806	-0.31072	-1.05131	0.725109	0.0564017	1.83555	0.203625	-0.807776	0.0576056	0.358972	-0.398849	-0.497669	0.277282	0.82475	-0.372091	-0.359256	1.0009	0.993523	0.49423
-393.76	0.463664	0.153681	-0.246776	1.02942	-0.310325	-1.06658	0.708387	0.0783148	1.74116	0.202467	-0.732967	0.0491004	0.363078	-0.424859	-0.50647	0.24708	0.790052	-0.395406	-0.366596	1.00823	1.08063	0.480414
-393.28	0.441429	0.163956	-0.283606	0.971759	-0.314375	-1.09655	0.695075	0.11352	1.65595	0.215141	-0.674407	0.0320034	0.35562	-0.46213	-0.505644	0.223942	0.76135	-0.415068	-0.371186	1.02047	1.13548	0.469869
-392.8	0.398238	0.163264	-0.306325	0.909804	-0.320801	-1.14201	0.689795	0.154065	1.58333	0.227185	-0.635802	0.00138099	0.339137	-0.497824	-0.496657	0.205922	0.742252	-0.432995	-0.374935	1.03851	1.15528	0.45987
-392.32	0.33504	0.145965	-0.319239	0.840636	-0.329749	-1.18849	0.695949	0.191964	1.52684	0.222831	-0.61715	-0.0404189	0.317032	-0.519278	-0.483991	0.190917	0.730076	-0.450346	-0.378326	1.05905	1.15229	0.451876
-391.84	0.266414	0.112079	-0.324971	0.773648	-0.339402	-1.21841	0.712841	0.223818	1.47738	0.190999	-0.614489	-0.0905081	0.295413	-0.523183	-0.473341	0.181903	0.722955	-0.469242	-0.380564	1.07853	1.14584	0.446517
-391.36	0.204691	0.0717364	-0.33056	0.716167	-0.346999	-1.22156	0.736814	0.251308	1.42472	0.133792	-0.624001	-0.143044	0.276186	-0.513244	-0.468568	0.183435	0.718503	-0.488471	-0.38172	1.09173	1.15117	0.446466
-390.88	0.15939	0.0392974	-0.340501	0.665985	-0.348244	-1.19408	0.760965	0.276809	1.3576	0.0655569	-0.636175	-0.195188	0.257197	-0.49655	-0.469007	0.199664	0.714231	-0.506519	-0.382314	1.09854	1.17083	0.448834
-390.4	0.125042	0.0252133	-0.361872	0.618548	-0.340171	-1.15206	0.779392	0.300627	1.27686	0.00027632	-0.652515	-0.244861	0.234588	-0.477632	-0.472561	0.232366	0.708266	-0.52202	-0.382967	1.10113	1.20402	0.450986
-389.92	0.0910557	0.0308643	-0.39057	0.564842	-0.319961	-1.11826	0.791355	0.319673	1.19307	-0.0514169	-0.671559	-0.289242	0.207069	-0.456546	-0.478222	0.275528	0.699488	-0.534611	-0.383017	1.10396	1.24556	0.450201
-389.44	0.0543062	0.0495237	-0.416444	0.508341	-0.293652	-1.10296	0.803528	0.331227	1.12022	-0.0931272	-0.697131	-0.322845	0.178085	-0.433654	-0.485887	0.323107	0.688584	-0.545654	-0.379648	1.1083	1.2931	0.447413
-388.96	0.0202312	0.0674164	-0.424175	0.459495	-0.266059	-1.1054	0.824445	0.335148	1.06893	-0.134492	-0.726918	-0.339651	0.152972	-0.412853	-0.495083	0.365016	0.678296	-0.554593	-0.36846	1.11286	1.34327	0.445421
-388.48	-0.00215762	0.0791608	-0.400473	0.440293	-0.239584	-1.11499	0.859359	0.334898	1.03542	-0.182727	-0.755084	-0.333744	0.136046	-0.401815	-0.502926	0.398204	0.674379	-0.558812	-0.349161	1.11449	1.39018	0.448455
-388	-0.00502173	0.0838573	-0.342534	0.466254	-0.213297	-1.13101	0.902131	0.334445	1.00886	-0.230817	-0.771847	-0.311396	0.12677	-0.404401	-0.505959	0.425001	0.68141	-0.553585	-0.323503	1.11112	1.42621	0.456852
-387.52	0.0130822	0.0842142	-0.259587	0.536022	-0.184244	-1.16039	0.940614	0.335238	0.975705	-0.262236	-0.772106	-0.284629	0.119546	-0.419116	-0.503567	0.449576	0.698231	-0.538313	-0.297865	1.10399	1.44468	0.468163
-387.04	0.0351295	0.0855657	-0.170906	0.63206	-0.150456	-1.2066	0.964735	0.336366	0.934267	-0.262266	-0.760539	-0.269786	0.110492	-0.437402	-0.499934	0.474511	0.717845	-0.514611	-0.276252	1.09815	1.44654	0.478917
-386.56	0.0415954	0.0884207	-0.0954596	0.720653	-0.114459	-1.25639	0.969068	0.335919	0.890141	-0.227259	-0.747038	-0.272444	0.0994989	-0.450284	-0.500574	0.502462	0.72991	-0.488617	-0.258785	1.09735	1.44005	0.488426
-386.08	0.0210626	0.0879363	-0.0428489	0.775463	-0.0818221	-1.27591	0.960803	0.332917	0.854969	-0.171547	-0.735872	-0.288211	0.0856077	-0.452702	-0.511575	0.530208	0.72723	-0.467301	-0.243736	1.10194	1.434	0.49728
-385.6	-0.0261224	0.0786362	-0.014032	0.789693	-0.0578192	-1.23144	0.948218	0.328377	0.8338	-0.11486	-0.726373	-0.30075	0.0696494	-0.445955	-0.529243	0.554456	0.710001	-0.45283	-0.225394	1.11032	1.43523	0.505597
-385.12	-0.0880506	0.0584127	0.000976791	0.772641	-0.0440181	-1.11848	0.93755	0.32316	0.827743	-0.0733867	-0.707309	-0.298652	0.0503382	-0.435584	-0.544204	0.569824	0.685711	-0.44522	-0.201537	1.1197	1.44103	0.514845
-384.64	-0.147025	0.0292768	0.0123318	0.751539	-0.0357858	-0.962988	0.926173	0.317805	0.831933	-0.0511747	-0.669973	-0.278107	0.0300535	-0.426526	-0.549887	0.575444	0.663016	-0.440021	-0.174328	1.12798	1.44915	0.526068
-384.16	-0.193134	-0.00451222	0.0254333	0.746529	-0.030923	-0.811629	0.904716	0.311111	0.840416	-0.0430919	-0.618114	-0.25269	0.0147856	-0.419888	-0.541795	0.575965	0.646235	-0.434117	-0.147859	1.13571	1.45839	0.540094
-383.68	-0.223201	-0.0332979	0.0392132	0.770093	-0.0235504	-0.697941	0.871017	0.3028	0.844858	-0.041546	-0.567629	-0.23998	0.0120021	-0.412811	-0.526191	0.575333	0.634634	-0.426893	-0.124759	1.14371	1.46701	0.557747
-383.2	-0.242566	-0.0519318	0.0505857	0.819028	-0.0142462	-0.6256	0.831599	0.294866	0.845166	-0.0446654	-0.536408	-0.25204	0.0269452	-0.405105	-0.515333	0.576373	0.623752	-0.419035	-0.105027	1.15334	1.47865	0.579863
-382.72	-0.257429	-0.0566437	0.0584637	0.883878	-0.00531794	-0.572397	0.792386	0.290305	0.842969	-0.0525707	-0.531523	-0.288111	0.054508	-0.396208	-0.516798	0.579511	0.610923	-0.410973	-0.0864052	1.16091	1.49274	0.605721
-382.24	-0.276101	-0.0485831	0.0637284	0.961038	-0.000862288	-0.518165	0.756859	0.289755	0.843617	-0.0613726	-0.54286	-0.339797	0.0804892	-0.389888	-0.531367	0.582095	0.597159	-0.402902	-0.0662678	1.16359	1.50688	0.633688
-381.76	-0.302738	-0.0367355	0.0697032	1.03971	-0.00334995	-0.465543	0.719042	0.291453	0.857956	-0.0633516	-0.549046	-0.395226	0.088738	-0.38966	-0.553729	0.578141	0.584852	-0.392728	-0.0440891	1.15871	1.51522	0.659289
-381.28	-0.337265	-0.0308888	0.0759539	1.10568	-0.015871	-0.434457	0.669186	0.291174	0.891079	-0.0498922	-0.539254	-0.445662	0.0722002	-0.399824	-0.57683	0.564928	0.575012	-0.379548	-0.0217681	1.14791	1.51516	0.68049
-380.8	-0.369972	-0.0363204	0.0801815	1.14361	-0.0405647	-0.438115	0.603923	0.285385	0.942784	-0.0208585	-0.509865	-0.486674	0.0371689	-0.419026	-0.598098	0.541295	0.566467	-0.363501	-0.0031141	1.13296	1.50559	0.695729
-380.32	-0.388805	-0.0576239	0.0775176	1.14028	-0.0764292	-0.469991	0.532886	0.274977	1.00232	0.0166239	-0.470458	-0.517071	-0.000583916	-0.443491	-0.61788	0.507973	0.557343	-0.346247	0.0105183	1.1186	1.49181	0.704098
-379.84	-0.392689	-0.0856084	0.0638384	1.09495	-0.123116	-0.503756	0.473728	0.264276	1.05637	0.0469954	-0.435987	-0.533655	-0.028221	-0.464532	-0.636814	0.465574	0.547713	-0.329566	0.0216906	1.10481	1.48113	0.707113
-379.36	-0.379012	-0.114928	0.043746	1.03759	-0.175668	-0.51481	0.442231	0.259166	1.09349	0.0630961	-0.415278	-0.536445	-0.0408416	-0.473627	-0.654809	0.419211	0.539843	-0.313912	0.0331988	1.0923	1.47853	0.706656
-378.88	-0.359788	-0.138961	0.0259458	1.00844	-0.228512	-0.504696	0.439776	0.261675	1.11654	0.0665252	-0.406589	-0.52921	-0.0463567	-0.467268	-0.673069	0.370316	0.534153	-0.30086	0.0476918	1.08222	1.485	0.70385
-378.4	-0.347589	-0.155617	0.0204763	1.03842	-0.278645	-0.489845	0.455029	0.269893	1.12537	0.0671737	-0.404134	-0.516553	-0.0538174	-0.448172	-0.693475	0.324684	0.527596	-0.291516	0.0631355	1.0763	1.50083	0.698166
-377.92	-0.34876	-0.169583	0.0292346	1.12656	-0.325297	-0.488042	0.472544	0.278965	1.12776	0.0703183	-0.40216	-0.501133	-0.0692877	-0.426403	-0.718929	0.287307	0.515982	-0.303977	0.0747211	1.0753	1.52231	0.690336
-377.44	-0.365318	-0.186746	0.0486159	1.24533	-0.371105	-0.492797	0.486055	0.284542	1.11954	0.0730728	-0.397421	-0.480021	-0.0871777	-0.413398	-0.75138	0.262031	0.495393	-0.305812	0.0773054	1.07667	1.54625	0.68075
-376.96	-0.39436	-0.212751	0.0688678	1.35373	-0.419325	-0.48429	0.50474	0.287297	1.10397	0.0597601	-0.383799	-0.448042	-0.0988433	-0.41668	-0.789623	0.248565	0.467347	-0.306071	0.0682337	1.07832	1.568	0.669174
-376.48	-0.433637	-0.250601	0.0805375	1.42815	-0.472024	-0.451386	0.543525	0.291162	1.07745	0.0221563	-0.362472	-0.406094	-0.0948747	-0.432546	-0.829283	0.243187	0.440497	-0.300146	0.0518664	1.0757	1.58609	0.657295
-376	-0.480896	-0.298192	0.0845754	1.45915	-0.525826	-0.411754	0.608972	0.300816	1.04749	-0.0396317	-0.338335	-0.360262	-0.0742694	-0.448789	-0.865294	0.243401	0.42373	-0.287054	0.0346348	1.06964	1.60235	0.645802
-375.52	-0.533104	-0.349661	0.0867195	1.46053	-0.573786	-0.404946	0.689893	0.316709	1.02095	-0.106853	-0.31567	-0.323093	-0.0442452	-0.452706	-0.894428	0.249892	0.422305	-0.271613	0.0232387	1.0626	1.61703	0.63568
-375.04	-0.582095	-0.397994	0.0909388	1.44048	-0.609961	-0.454421	0.766474	0.334202	1.00193	-0.158216	-0.298782	-0.302094	-0.013688	-0.441515	-0.914317	0.266797	0.434106	-0.262105	0.0209359	1.05891	1.63739	0.627155
-374.56	-0.617158	-0.43959	0.0965845	1.4037	-0.632048	-0.550657	0.81677	0.346315	0.991554	-0.179975	-0.294009	-0.293048	0.00951898	-0.421402	-0.92743	0.298068	0.452668	-0.262855	0.0257918	1.05854	1.66521	0.620644
-374.08	-0.632652	-0.47216	0.0988684	1.3487	-0.642137	-0.648906	0.83688	0.349448	0.989913	-0.176672	-0.298606	-0.28498	0.0211704	-0.406879	-0.93483	0.337697	0.470277	-0.271894	0.0346874	1.06086	1.69897	0.616903
-373.6	-0.627741	-0.497692	0.0917379	1.27831	-0.645852	-0.708524	0.83755	0.344209	0.997469	-0.163286	-0.31191	-0.268455	0.0219852	-0.408121	-0.940808	0.37022	0.483756	-0.281447	0.0444121	1.06157	1.73313	0.617062
-373.12	-0.614032	-0.520378	0.0738898	1.211	-0.650791	-0.715044	0.836614	0.335512	1.02168	-0.157679	-0.33124	-0.244783	0.0142852	-0.422246	-0.949705	0.381262	0.493198	-0.282738	0.0535403	1.05924	1.76601	0.618895
-372.64	-0.607181	-0.54303	0.047628	1.16412	-0.661185	-0.692402	0.850651	0.327932	1.06285	-0.169148	-0.351462	-0.223926	0.00116055	-0.436151	-0.965918	0.362762	0.49981	-0.272876	0.0629445	1.05484	1.79451	0.621068
-372.16	-0.611435	-0.566964	0.0160709	1.14423	-0.679999	-0.673119	0.878199	0.322577	1.10855	-0.197566	-0.363346	-0.216749	-0.0153211	-0.43428	-0.993454	0.321624	0.502066	-0.255907	0.0734975	1.0487	1.82306	0.620749
-371.68	-0.62377	-0.588836	-0.023687	1.14025	-0.7066	-0.669471	0.90535	0.316036	1.13884	-0.232754	-0.348916	-0.224286	-0.0312136	-0.408038	-1.02996	0.27787	0.496181	-0.240647	0.0847077	1.04053	1.85037	0.616764
-371.2	-0.629414	-0.606386	-0.0712599	1.12565	-0.735845	-0.666906	0.919686	0.306141	1.13278	-0.267658	-0.296177	-0.236828	-0.0430337	-0.364309	-1.06972	0.250319	0.482696	-0.231383	0.0965417	1.02754	1.87675	0.611733
-370.72	-0.621835	-0.612559	-0.125764	1.08204	-0.760953	-0.641842	0.91372	0.292621	1.08218	-0.293258	-0.207294	-0.242847	-0.0487218	-0.314874	-1.10636	0.245877	0.464204	-0.22798	0.108106	1.00741	1.89762	0.610354
-370.24	-0.602202	-0.606389	-0.177964	1.01474	-0.770966	-0.587249	0.887239	0.279712	0.999273	-0.306464	-0.102771	-0.23819	-0.0491037	-0.272834	-1.13551	0.255065	0.447666	-0.225627	0.117521	0.982552	1.90793	0.614284
-369.76	-0.578104	-0.590328	-0.216625	0.942652	-0.76216	-0.528015	0.849489	0.271983	0.90238	-0.302872	-0.0144542	-0.228995	-0.0459973	-0.242633	-1.1583	0.262003	0.439947	-0.222292	0.122182	0.95931	1.90737	0.623214
-369.28	-0.558886	-0.569903	-0.247702	0.88326	-0.734575	-0.497675	0.812274	0.270609	0.811088	-0.284182	0.0346433	-0.223216	-0.041427	-0.217839	-1.17989	0.252587	0.443529	-0.217781	0.119467	0.946457	1.90211	0.631582
-368.8	-0.550286	-0.55354	-0.252884	0.847941	-0.694877	-0.513701	0.781303	0.271175	0.734277	-0.256434	0.045808	-0.227763	-0.0360447	-0.190598	-1.20345	0.224176	0.455935	-0.215007	0.110304	0.948292	1.90052	0.634816
-368.32	-0.548093	-0.551119	-0.250194	0.826326	-0.654441	-0.56495	0.759671	0.2682	0.668851	-0.224027	0.0433203	-0.239659	-0.0270198	-0.158135	-1.22867	0.184439	0.470412	-0.215977	0.101417	0.963682	1.9061	0.63105
-367.84	-0.547049	-0.566888	-0.255787	0.804537	-0.620635	-0.626919	0.745835	0.259339	0.610002	-0.193793	0.0544345	-0.24867	-0.0123109	-0.124875	-1.24836	0.146914	0.481901	-0.219686	0.100416	0.984735	1.91688	0.626369
-367.36	-0.53744	-0.598981	-0.281719	0.771167	-0.592386	-0.674659	0.735436	0.247819	0.556062	-0.170732	0.0927929	-0.251049	0.0088542	-0.0996015	-1.25347	0.121058	0.488964	-0.225338	0.114269	1.00467	1.9213	0.62791
-366.88	-0.51609	-0.635301	-0.328507	0.722746	-0.565224	-0.706126	0.730581	0.239204	0.502011	-0.154027	0.146368	-0.245069	0.0324925	-0.0899483	-1.23614	0.111922	0.493653	-0.232448	0.144666	1.02006	1.91019	0.638936
-366.4	-0.481232	-0.665326	-0.384925	0.666149	-0.535443	-0.722692	0.730467	0.23661	0.44353	-0.136788	0.192345	-0.238282	0.0512273	-0.0988315	-1.198	0.119066	0.499022	-0.242913	0.184196	1.03148	1.88324	0.659689
-365.92	-0.432276	-0.6794	-0.437479	0.608128	-0.504072	-0.718569	0.736486	0.238422	0.37639	-0.109723	0.217108	-0.236349	0.0603578	-0.122357	-1.14537	0.141238	0.506809	-0.25842	0.221107	1.04291	1.84408	0.682762
-365.44	-0.374032	-0.67819	-0.478606	0.555271	-0.479829	-0.680472	0.746955	0.238021	0.301152	-0.066992	0.223116	-0.244847	0.0615438	-0.153558	-1.08937	0.174291	0.516317	-0.276729	0.247123	1.05681	1.79872	0.701752
-364.96	-0.310906	-0.666276	-0.50825	0.509063	-0.468753	-0.593774	0.76153	0.230045	0.226709	-0.0086282	0.221453	-0.263701	0.061059	-0.185707	-1.03509	0.210571	0.525437	-0.292557	0.258343	1.07275	1.75181	0.713774
-364.48	-0.246618	-0.652062	-0.532196	0.472797	-0.471316	-0.462101	0.775722	0.213387	0.161274	0.0541515	0.220479	-0.288815	0.0678044	-0.21706	-0.985325	0.241784	0.531471	-0.299808	0.258064	1.08629	1.70603	0.722408
-364	-0.182782	-0.639056	-0.55562	0.448436	-0.481038	-0.316191	0.787254	0.192818	0.113217	0.106015	0.212863	-0.317083	0.0835275	-0.249706	-0.939095	0.261094	0.533607	-0.296782	0.253677	1.09062	1.66112	0.732351
-363.52	-0.119701	-0.625362	-0.5767	0.443276	-0.487367	-0.192309	0.793344	0.172909	0.0746515	0.135577	0.187923	-0.34457	0.104927	-0.288338	-0.893266	0.268226	0.531486	-0.306817	0.251139	1.08315	1.61578	0.748387
-363.04	-0.0566333	-0.607645	-0.588435	0.467346	-0.4831	-0.116557	0.796653	0.157083	0.0310289	0.137895	0.139262	-0.370835	0.121506	-0.332584	-0.848311	0.266942	0.525202	-0.299596	0.252836	1.06555	1.5722	0.770837
-362.56	0.00100695	-0.583475	-0.584962	0.511335	-0.468142	-0.0856051	0.802497	0.145369	-0.0247036	0.116663	0.0720822	-0.3961	0.124158	-0.375947	-0.807993	0.267698	0.516117	-0.298628	0.257991	1.043	1.52831	0.793442
-362.08	0.0497089	-0.556171	-0.567863	0.571802	-0.448877	-0.0833547	0.815199	0.134962	-0.0873286	0.0807912	-0.00068071	-0.421266	0.110116	-0.40249	-0.777047	0.27275	0.50647	-0.306371	0.26494	1.02288	1.48268	0.808936
-361.6	0.0808862	-0.532604	-0.546586	0.628622	-0.432375	-0.0846364	0.832578	0.124046	-0.136623	0.0379179	-0.0668367	-0.44421	0.0829259	-0.397347	-0.758423	0.282511	0.499503	-0.321221	0.271211	1.01025	1.433	0.812335
-361.12	0.093741	-0.515144	-0.532118	0.669576	-0.421469	-0.0812095	0.849757	0.113044	-0.154337	-0.0052921	-0.123905	-0.458218	0.049438	-0.354327	-0.752383	0.288374	0.496111	-0.339541	0.274787	1.00725	1.37737	0.803401
-360.64	0.0859459	-0.501244	-0.530361	0.687971	-0.413847	-0.0653076	0.859983	0.102269	-0.138027	-0.0454911	-0.174377	-0.455757	0.0130519	-0.283457	-0.757817	0.284362	0.496229	-0.357924	0.274123	1.00932	1.31835	0.786084
-360.16	0.0654722	-0.487481	-0.538289	0.685683	-0.408608	-0.0325487	0.857432	0.0923066	-0.102825	-0.0737744	-0.216876	-0.429743	-0.0244125	-0.205742	-0.769678	0.268608	0.496942	-0.374779	0.267256	1.01051	1.26003	0.766275
-359.68	0.0441351	-0.472324	-0.545471	0.667773	-0.407606	0.0178382	0.842605	0.0811549	-0.0693455	-0.0846089	-0.250505	-0.381417	-0.0622043	-0.144516	-0.783901	0.241889	0.496071	-0.390518	0.255969	1.00369	1.20918	0.749774
-359.2	0.0360006	-0.458957	-0.536639	0.642119	-0.41538	0.0908015	0.817994	0.0663249	-0.0512172	-0.0729486	-0.271839	-0.31804	-0.0985635	-0.114161	-0.796648	0.211867	0.492648	-0.407465	0.244889	0.984955	1.16843	0.739171
-358.72	0.047557	-0.454797	-0.504877	0.612761	-0.437818	0.175358	0.786582	0.0481735	-0.0493031	-0.0409116	-0.281074	-0.256081	-0.129004	-0.112798	-0.806329	0.181686	0.487019	-0.424997	0.238933	0.957946	1.1399	0.733039
-358.24	0.0755433	-0.461659	-0.451666	0.587116	-0.473735	0.256019	0.746647	0.0286154	-0.0511407	0.00471133	-0.281725	-0.209533	-0.14673	-0.128103	-0.813461	0.156364	0.479544	-0.441551	0.240605	0.929652	1.12258	0.732345
-357.76	0.10986	-0.477843	-0.38747	0.576461	-0.517483	0.312331	0.695005	0.010624	-0.0516638	0.051088	-0.279544	-0.185593	-0.144354	-0.144266	-0.818194	0.133939	0.472558	-0.454447	0.248865	0.908509	1.11474	0.735449
-357.28	0.1354	-0.495416	-0.32234	0.590317	-0.558611	0.333556	0.631607	-0.00377722	-0.0527431	0.09071	-0.274495	-0.180259	-0.121074	-0.152026	-0.821882	0.11739	0.465722	-0.462833	0.260121	0.899197	1.11343	0.743367
-356.8	0.144804	-0.50751	-0.263781	0.626394	-0.589698	0.319807	0.561388	-0.0134142	-0.0639865	0.119111	-0.26103	-0.183826	-0.0818627	-0.152748	-0.826601	0.106028	0.459866	-0.467701	0.269854	0.898799	1.11629	0.756633
-356.32	0.136961	-0.515394	-0.213976	0.675952	-0.608163	0.27693	0.494943	-0.0199245	-0.0864417	0.134541	-0.232176	-0.182972	-0.0374434	-0.154059	-0.831127	0.0998137	0.457833	-0.472733	0.27454	0.899001	1.11585	0.775934
-355.84	0.121212	-0.527768	-0.17129	0.722892	-0.616869	0.214462	0.43976	-0.024011	-0.111777	0.136864	-0.189396	-0.170439	0.00281336	-0.165049	-0.837222	0.0943106	0.462173	-0.481426	0.274984	0.891245	1.11023	0.798915
-355.36	0.109381	-0.551739	-0.139683	0.759611	-0.620926	0.140825	0.401364	-0.02597	-0.128135	0.126775	-0.141627	-0.14572	0.0309382	-0.187199	-0.843573	0.086577	0.474872	-0.492739	0.272845	0.870864	1.10107	0.823746
-354.88	0.106636	-0.589779	-0.121705	0.788541	-0.621853	0.0660595	0.377125	-0.0248694	-0.130027	0.107374	-0.0995819	-0.116646	0.0475309	-0.217537	-0.849824	0.0743946	0.492829	-0.50083	0.270702	0.839934	1.09111	0.849039
-354.4	0.116175	-0.634553	-0.119795	0.824128	-0.619148	0.0066845	0.361053	-0.0191989	-0.127343	0.0868802	-0.0719155	-0.0930851	0.0558936	-0.246595	-0.850163	0.064054	0.510153	-0.50088	0.272316	0.8076	1.08295	0.876324
-353.92	0.133025	-0.671558	-0.133941	0.878685	-0.612262	-0.0162275	0.348776	-0.00907467	-0.138535	0.0745504	-0.0587532	-0.0828671	0.0624057	-0.265769	-0.843019	0.0562961	0.522672	-0.490769	0.280384	0.783073	1.07701	0.907863
-353.44	0.152552	-0.687914	-0.154888	0.95163	-0.601983	-0.000112653	0.338479	0.00391187	-0.174907	0.0785286	-0.0568454	-0.0849247	0.0726024	-0.269501	-0.826057	0.0561469	0.528252	-0.474052	0.296111	0.771355	1.07245	0.945514
-352.96	0.170043	-0.681144	-0.172167	1.02297	-0.591373	0.031892	0.332578	0.0172244	-0.233445	0.0965367	-0.0582744	-0.0958034	0.0875048	-0.260244	-0.804923	0.0575644	0.530707	-0.459104	0.31631	0.768675	1.06196	0.988248
-352.48	0.183045	-0.658113	-0.176071	1.06693	-0.588772	0.0439876	0.332837	0.0298953	-0.299617	0.118702	-0.0605925	-0.109772	0.10605	-0.243552	-0.787601	0.0537638	0.534329	-0.450938	0.333811	0.770165	1.04594	1.03289
-352	0.187019	-0.631107	-0.164617	1.06569	-0.599311	0.00161227	0.340703	0.0403647	-0.358443	0.135269	-0.0619673	-0.126621	0.126203	-0.227144	-0.785616	0.040914	0.541665	-0.449944	0.34318	0.77162	1.02535	1.0741
-351.52	0.180965	-0.614323	-0.144374	1.03055	-0.624497	-0.10989	0.35453	0.0490965	-0.403998	0.142278	-0.0667507	-0.148676	0.144528	-0.214226	-0.802719	0.0210876	0.550367	-0.450204	0.342014	0.772022	1.00767	1.10659
-351.04	0.161589	-0.613498	-0.125888	0.988665	-0.663409	-0.269418	0.374727	0.0573275	-0.444094	0.142646	-0.0779868	-0.180516	0.157762	-0.204927	-0.833291	0.00593598	0.554119	-0.446377	0.332752	0.773622	0.994893	1.13002
-350.56	0.131309	-0.628325	-0.117682	0.958753	-0.707723	-0.436735	0.402062	0.0648916	-0.486622	0.144264	-0.0939156	-0.219154	0.163379	-0.194329	-0.864425	0.00259701	0.549995	-0.437705	0.32228	0.775121	0.988209	1.14487
-350.08	0.0961099	-0.651196	-0.120103	0.951188	-0.749919	-0.576934	0.434768	0.0724187	-0.535695	0.155992	-0.112136	-0.255463	0.159668	-0.172771	-0.88871	0.0152171	0.538766	-0.42856	0.314874	0.774205	0.980942	1.15368
-349.6	0.0641669	-0.673315	-0.126688	0.951131	-0.78396	-0.673343	0.473407	0.0787103	-0.584759	0.181252	-0.123482	-0.278023	0.149807	-0.136196	-0.905241	0.0370349	0.524714	-0.422359	0.31187	0.768612	0.971485	1.15796
-349.12	0.043604	-0.686677	-0.129472	0.941235	-0.804804	-0.736069	0.518012	0.0841063	-0.626081	0.218993	-0.119258	-0.279384	0.139114	-0.0848214	-0.917875	0.0594923	0.512647	-0.417973	0.308463	0.759853	0.956113	1.15754
-348.64	0.0496375	-0.690318	-0.121445	0.915849	-0.813981	-0.780956	0.568231	0.0881671	-0.648784	0.264932	-0.0991976	-0.26393	0.13367	-0.0271572	-0.932755	0.0735292	0.503153	-0.410197	0.298145	0.75238	0.939329	1.15062
-348.16	0.0855971	-0.688026	-0.107206	0.886283	-0.818544	-0.820309	0.620793	0.091031	-0.652336	0.313238	-0.0661165	-0.241813	0.136131	0.0241019	-0.948316	0.0799747	0.491722	-0.391103	0.278457	0.749607	0.928429	1.13489
-347.68	0.149169	-0.688317	-0.089874	0.869174	-0.823613	-0.851483	0.667812	0.0930225	-0.636568	0.356731	-0.0276619	-0.22414	0.143214	0.0572901	-0.955993	0.0829166	0.474406	-0.358835	0.253495	0.747388	0.923685	1.11198
-347.2	0.217919	-0.696838	-0.0724908	0.880851	-0.833183	-0.860603	0.704805	0.0948631	-0.606598	0.390069	0.000813083	-0.216128	0.145992	0.0700234	-0.947831	0.0836414	0.450882	-0.321929	0.230536	0.737711	0.926682	1.08621
-346.72	0.267742	-0.716389	-0.0553714	0.919673	-0.84559	-0.845985	0.726093	0.0976575	-0.566818	0.409267	0.0121111	-0.216027	0.138585	0.0693309	-0.922015	0.0789928	0.423122	-0.289134	0.216269	0.714028	0.930751	1.06116
-346.24	0.27459	-0.742718	-0.0368037	0.965555	-0.854675	-0.819897	0.730459	0.0995952	-0.520671	0.416046	0.0050754	-0.219381	0.120443	0.0686675	-0.883864	0.0667822	0.399208	-0.268968	0.213266	0.681341	0.934351	1.04067
-345.76	0.231371	-0.77015	-0.0134978	1.00622	-0.854489	-0.800536	0.719087	0.0999027	-0.469937	0.418251	-0.0144134	-0.219189	0.0985238	0.0801937	-0.848055	0.0462466	0.386234	-0.26141	0.219562	0.658822	0.936991	1.02499
-345.28	0.150378	-0.788955	0.0100969	1.03775	-0.843492	-0.809129	0.697138	0.0976851	-0.415488	0.422862	-0.0402544	-0.214665	0.0804571	0.107386	-0.822019	0.0221459	0.385709	-0.261605	0.228757	0.66655	0.944018	1.01318
-344.8	0.0507167	-0.794418	0.0251453	1.06979	-0.824204	-0.845168	0.667061	0.0920989	-0.361676	0.434333	-0.0700347	-0.205735	0.0685581	0.14534	-0.807157	0.0029808	0.395193	-0.262485	0.234552	0.708866	0.95629	1.00439
-344.32	-0.0468451	-0.780707	0.0265709	1.11553	-0.800528	-0.897306	0.633388	0.0833456	-0.313465	0.446957	-0.106714	-0.192578	0.0589241	0.185857	-0.799389	-0.00593899	0.408551	-0.260762	0.23308	0.769336	0.973001	0.998981
-343.84	-0.137818	-0.752492	0.0155922	1.17803	-0.777474	-0.93588	0.601795	0.0729088	-0.276695	0.451681	-0.150656	-0.173297	0.0465556	0.221929	-0.792526	-0.00466132	0.418435	-0.256853	0.225343	0.814889	0.989096	0.998582
-343.36	-0.222866	-0.718222	-0.00201033	1.25704	-0.75841	-0.947624	0.578583	0.0638502	-0.258895	0.439771	-0.198538	-0.14788	0.0293525	0.251952	-0.789149	-0.000379421	0.420325	-0.254479	0.214282	0.817834	1.00017	1.00616
-342.88	-0.303921	-0.688583	-0.018711	1.34252	-0.742517	-0.931052	0.570263	0.0602201	-0.259048	0.410945	-0.235804	-0.12376	0.0121284	0.276296	-0.788544	0.00245132	0.414881	-0.256791	0.203371	0.773833	1.00574	1.02104
-342.4	-0.373178	-0.674325	-0.0320834	1.42504	-0.727306	-0.90333	0.582844	0.0650468	-0.270724	0.373161	-0.250103	-0.108726	0.00176487	0.299689	-0.791686	0.00180674	0.407311	-0.264135	0.196768	0.705088	1.01034	1.04099
-341.92	-0.418347	-0.681041	-0.0427644	1.49688	-0.711903	-0.88857	0.609152	0.0781478	-0.285749	0.337336	-0.238711	-0.11298	9.70134e-05	0.320859	-0.795179	-0.00146987	0.404058	-0.274126	0.193942	0.643463	1.01868	1.05997
-341.44	-0.427853	-0.707377	-0.0564284	1.55431	-0.697268	-0.90083	0.63428	0.0962335	-0.294402	0.310728	-0.214647	-0.140558	0.00170242	0.339856	-0.793121	-0.00577904	0.408116	-0.285496	0.190105	0.611192	1.03094	1.07378
-340.96	-0.404636	-0.74395	-0.0717133	1.59233	-0.686241	-0.940497	0.641053	0.112525	-0.290781	0.291819	-0.206421	-0.185004	-0.00318613	0.355834	-0.784918	-0.0136449	0.418983	-0.295736	0.180701	0.608548	1.04355	1.07931
-340.48	-0.364111	-0.779078	-0.0826247	1.61581	-0.679371	-0.994678	0.622455	0.121679	-0.279354	0.272819	-0.231317	-0.238486	-0.0210889	0.366975	-0.773201	-0.0262737	0.428787	-0.304537	0.163067	0.61606	1.05114	1.07704
-340	-0.32822	-0.805365	-0.0842974	1.62325	-0.677477	-1.04369	0.579779	0.12085	-0.266682	0.244634	-0.28199	-0.291839	-0.0482875	0.374876	-0.763964	-0.0424114	0.433142	-0.309907	0.139596	0.610779	1.04824	1.07031
-339.52	-0.310573	-0.826506	-0.0768252	1.61825	-0.680142	-1.07857	0.526342	0.110166	-0.261365	0.206198	-0.328948	-0.341482	-0.0749294	0.380668	-0.760606	-0.0563192	0.430995	-0.30972	0.117317	0.583252	1.03827	1.06521
-339.04	-0.315841	-0.849974	-0.0668869	1.60361	-0.68658	-1.09705	0.479201	0.0947231	-0.26634	0.168633	-0.342921	-0.386049	-0.088714	0.386049	-0.75893	-0.0638589	0.426023	-0.302215	0.10194	0.538682	1.02701	1.06543
-338.56	-0.338268	-0.883753	-0.0596847	1.57546	-0.694572	-1.11111	0.447498	0.0797173	-0.28158	0.143889	-0.313065	-0.42434	-0.0849767	0.392127	-0.750518	-0.0642535	0.426077	-0.28942	0.0963613	0.489781	1.01952	1.07464
-338.08	-0.368921	-0.928901	-0.059225	1.53256	-0.701893	-1.13415	0.427371	0.0686459	-0.300546	0.140212	-0.259966	-0.457762	-0.0682755	0.399122	-0.725757	-0.0627363	0.431692	-0.276069	0.0973863	0.448246	1.01378	1.09431
-337.6	-0.397102	-0.978598	-0.0607108	1.47243	-0.706438	-1.17814	0.413954	0.063109	-0.309976	0.156438	-0.218649	-0.487327	-0.0473292	0.407041	-0.681883	-0.0672641	0.438275	-0.266443	0.0990508	0.417983	1.01055	1.11957
-337.12	-0.414844	-1.01561	-0.0566037	1.39669	-0.709647	-1.23783	0.40131	0.0624099	-0.300249	0.182753	-0.21133	-0.515629	-0.029828	0.415215	-0.626908	-0.0779442	0.436258	-0.261627	0.0982079	0.396403	1.00527	1.14738
-336.64	-0.421732	-1.02894	-0.0445377	1.31284	-0.714243	-1.30276	0.388809	0.0651126	-0.268245	0.214781	-0.227154	-0.562947	-0.0145669	0.423822	-0.572841	-0.0888605	0.41962	-0.258533	0.0963734	0.379454	0.993559	1.17107
-336.16	-0.419266	-1.01204	-0.0287765	1.22924	-0.767909	-1.35527	0.381015	0.0709942	-0.225491	0.254908	-0.239803	-0.60098	0.0035635	0.434605	-0.528931	-0.0906434	0.389995	-0.249567	0.0977444	0.365773	0.977656	1.18804
-335.68	-0.410469	-0.971702	-0.014965	1.15465	-0.784222	-1.37813	0.381638	0.079996	-0.185197	0.306558	-0.231967	-0.643361	0.0301536	0.448552	-0.501603	-0.0793481	0.35706	-0.231004	0.107487	0.355505	0.958043	1.19872
-335.2	-0.398901	-0.919871	-0.011707	1.09151	-0.805417	-1.38123	0.389219	0.0916745	-0.163462	0.370496	-0.209556	-0.682364	0.0651003	0.464653	-0.488542	-0.0600825	0.331457	-0.204784	0.126217	0.348477	0.936155	1.20588
-334.72	-0.388107	-0.870679	-0.0149368	1.04067	-0.823785	-1.39109	0.394794	0.104787	-0.168749	0.434959	-0.198941	-0.713293	0.103034	0.480673	-0.482165	-0.0439285	0.31795	-0.17844	0.149701	0.344893	0.915377	1.21332
-334.24	-0.378005	-0.831882	-0.0208271	0.996831	-0.832037	-1.43505	0.392531	0.116391	-0.196001	0.482012	-0.224875	-0.733034	0.137031	0.492559	-0.475273	-0.0419038	0.314366	-0.161104	0.17173	0.344758	0.895917	1.22225
-333.76	-0.371947	-0.803294	-0.0198851	0.952297	-0.828167	-1.52368	0.378038	0.123028	-0.23727	0.49934	-0.285403	-0.745431	0.162311	0.499867	-0.464338	-0.05324	0.312633	-0.155154	0.188917	0.348269	0.881551	1.23331
-333.28	-0.373329	-0.782637	-0.00746865	0.90292	-0.813409	-1.6393	0.354732	0.124107	-0.28054	0.493435	-0.346994	-0.752139	0.179774	0.504194	-0.446219	-0.0666555	0.306776	-0.158449	0.200351	0.358506	0.873613	1.24599
-332.8	-0.384702	-0.764725	0.0125839	0.840251	-0.795872	-1.73884	0.327605	0.121389	-0.315826	0.481783	-0.37503	-0.756789	0.192212	0.508813	-0.421798	-0.0681436	0.296355	-0.162607	0.206704	0.377504	0.874166	1.25919
-332.32	-0.409846	-0.746033	0.037652	0.765769	-0.783717	-1.78612	0.305017	0.119765	-0.341962	0.483947	-0.352246	-0.759586	0.202805	0.516144	-0.393813	-0.0504849	0.286725	-0.161264	0.207403	0.401742	0.881258	1.27079
-331.84	-0.446123	-0.725632	0.0641481	0.687237	-0.779307	-1.78185	0.290725	0.123332	-0.363768	0.5044	-0.292734	-0.761254	0.214124	0.52218	-0.36628	-0.0168469	0.284232	-0.153375	0.2028	0.428034	0.891779	1.27896
-331.36	-0.49122	-0.700002	0.0951561	0.611971	-0.782043	-1.75481	0.285729	0.133565	-0.377638	0.534128	-0.219808	-0.762793	0.226539	0.522796	-0.345234	0.0184462	0.291645	-0.141636	0.193258	0.452739	0.899779	1.28305
-330.88	-0.538119	-0.669624	0.132476	0.550866	-0.78579	-1.74289	0.287807	0.149052	-0.379242	0.555826	-0.157972	-0.765848	0.239354	0.514751	-0.330473	0.0449523	0.307728	-0.12971	0.182242	0.473426	0.899464	1.28421
-330.4	-0.57643	-0.636991	0.176873	0.506973	-0.785989	-1.76141	0.291313	0.164729	-0.361828	0.559836	-0.115191	-0.772005	0.252533	0.497831	-0.321321	0.0588065	0.328942	-0.119355	0.174147	0.490774	0.887113	1.28349
-329.92	-0.605935	-0.605498	0.22563	0.477847	-0.78373	-1.7917	0.294117	0.175961	-0.319711	0.554989	-0.0905852	-0.779908	0.264289	0.479811	-0.311107	0.0647743	0.350327	-0.109638	0.169885	0.508222	0.864805	1.28605
-329.44	-0.622811	-0.577078	0.269377	0.456539	-0.784332	-1.79207	0.294164	0.17923	-0.257766	0.554123	-0.0776779	-0.789516	0.272341	0.462931	-0.295599	0.0680394	0.36822	-0.0984054	0.167802	0.527184	0.840758	1.29425
-328.96	-0.628034	-0.555428	0.298838	0.434527	-0.791764	-1.73923	0.29219	0.174263	-0.189083	0.568254	-0.0811384	-0.800679	0.274426	0.448237	-0.274756	0.0720844	0.378277	-0.0862197	0.164882	0.545208	0.824254	1.30825
-328.48	-0.628703	-0.538634	0.306798	0.411612	-0.809486	-1.64173	0.289672	0.161943	-0.130731	0.592292	-0.0995499	-0.812412	0.268899	0.432426	-0.253159	0.0720359	0.378006	-0.0731284	0.16018	0.559913	0.821529	1.32683
-328	-0.631385	-0.519856	0.293569	0.393431	-0.837105	-1.53814	0.289394	0.143475	-0.0964587	0.612978	-0.120134	-0.824815	0.256441	0.408476	-0.240565	0.0635259	0.368749	-0.0599796	0.155984	0.566879	0.828713	1.34568
-327.52	-0.64818	-0.498589	0.265489	0.390792	-0.870985	-1.46805	0.294333	0.121252	-0.0868012	0.619764	-0.123063	-0.835614	0.238877	0.374962	-0.245286	0.0491958	0.354733	-0.0465841	0.158013	0.566647	0.834141	1.36237
-327.04	-0.687728	-0.474282	0.2362	0.412192	-0.906726	-1.44078	0.303894	0.0984498	-0.0917032	0.611296	-0.0963017	-0.837964	0.218302	0.333127	-0.266303	0.035301	0.342673	-0.0305963	0.168746	0.561367	0.827739	1.37694
-326.56	-0.754723	-0.451336	0.214773	0.457075	-0.942019	-1.43707	0.315784	0.0775804	-0.0982976	0.596855	-0.04269	-0.833736	0.19497	0.286012	-0.297921	0.032895	0.338283	-0.0122698	0.185692	0.554521	0.810359	1.38952
-326.08	-0.847011	-0.432409	0.205933	0.514859	-0.975193	-1.42882	0.324649	0.0613585	-0.0947335	0.58607	0.018602	-0.824827	0.169594	0.237482	-0.333743	0.0419537	0.34179	0.00904227	0.201564	0.5486	0.78961	1.40019
-325.6	-0.946925	-0.417962	0.20319	0.57027	-1.00764	-1.41258	0.32322	0.0499738	-0.0822487	0.584288	0.0679361	-0.820563	0.141871	0.191036	-0.37012	0.0558646	0.348798	0.0319326	0.212969	0.544497	0.781268	1.40798
-325.12	-1.03807	-0.402232	0.198286	0.610453	-1.04156	-1.41114	0.302741	0.0430827	-0.064823	0.589412	0.0996909	-0.826617	0.112941	0.151133	-0.405015	0.0645456	0.355451	0.0560564	0.220874	0.539868	0.793811	1.41485
-324.64	-1.11318	-0.380456	0.183714	0.630544	-1.07853	-1.45085	0.264011	0.0403209	-0.0529951	0.59152	0.125987	-0.843161	0.0846576	0.120131	-0.442451	0.0637821	0.361895	0.0783677	0.232105	0.533066	0.823359	1.42242
-324.16	-1.17435	-0.355223	0.159816	0.641837	-1.11933	-1.53726	0.207684	0.0434507	-0.0455674	0.58231	0.161431	-0.863499	0.0616311	0.0986503	-0.478294	0.0588837	0.372561	0.0968867	0.252477	0.523406	0.855847	1.43539
-323.68	-1.23158	-0.331968	0.132188	0.652919	-1.1591	-1.64808	0.141894	0.0547874	-0.0430743	0.556395	0.210557	-0.875154	0.0478907	0.0848739	-0.50994	0.0615545	0.392733	0.108736	0.280831	0.511854	0.879435	1.45723
-323.2	-1.29327	-0.319395	0.107782	0.671544	-1.19144	-1.74737	0.0775837	0.0753267	-0.0372929	0.511533	0.261161	-0.869877	0.0468254	0.0756436	-0.535007	0.074152	0.422946	0.110589	0.309538	0.499567	0.881019	1.48584
-322.72	-1.35709	-0.320884	0.0867345	0.69241	-1.20973	-1.80682	0.020926	0.101751	-0.023883	0.452139	0.297095	-0.847786	0.0585251	0.0679951	-0.552732	0.0931608	0.458107	0.101935	0.327559	0.488848	0.866845	1.5176
-322.24	-1.41089	-0.332833	0.0661824	0.70175	-1.20856	-1.8349	-0.0271681	0.126871	0.0052839	0.386084	0.307483	-0.818821	0.0791366	0.0617123	-0.562424	0.105156	0.488558	0.0844469	0.33091	0.480659	0.846822	1.54552
-321.76	-1.44177	-0.347629	0.0456857	0.692221	-1.18947	-1.85044	-0.0674841	0.143624	0.054797	0.321534	0.290542	-0.791955	0.100131	0.0575235	-0.565276	0.0995728	0.507318	0.0622637	0.324842	0.474773	0.828031	1.56606
-321.28	-1.44203	-0.358093	0.0284361	0.666086	-1.16079	-1.87803	-0.10473	0.14773	0.125369	0.267644	0.259738	-0.772403	0.112792	0.0546451	-0.558429	0.076343	0.513555	0.0385189	0.320409	0.46975	0.816235	1.57949
-320.8	-1.41184	-0.36394	0.0208554	0.635421	-1.13396	-1.9127	-0.139925	0.140294	0.210829	0.225594	0.221446	-0.760727	0.111943	0.0489122	-0.538297	0.0454485	0.513075	0.0166247	0.325848	0.462158	0.808532	1.58842
-320.32	-1.36386	-0.368414	0.0272079	0.614596	-1.11639	-1.93312	-0.171404	0.124542	0.298279	0.191058	0.175153	-0.750549	0.100391	0.0372175	-0.502605	0.0181595	0.513923	-0.00105156	0.342182	0.449458	0.801596	1.59532
-319.84	-1.31695	-0.371501	0.0412251	0.612065	-1.11432	-1.92204	-0.196702	0.105488	0.370539	0.153897	0.124464	-0.736963	0.0855463	0.0185185	-0.453927	0.00234977	0.520172	-0.0126936	0.363471	0.431031	0.795023	1.60044
-319.36	-1.28047	-0.370695	0.0543615	0.623898	-1.12681	-1.87635	-0.214185	0.0861084	0.418475	0.107858	0.075725	-0.719026	0.0759429	-0.00291156	-0.400483	-0.00421694	0.532261	-0.0188206	0.381871	0.410004	0.78944	1.6045
-318.88	-1.25668	-0.359553	0.0598703	0.637245	-1.15258	-1.81324	-0.225421	0.0685547	0.445847	0.0562281	0.036775	-0.699805	0.0757122	-0.0213999	-0.34964	-0.00767447	0.547093	-0.02001	0.391522	0.39059	0.789003	1.60705
-318.4	-1.24048	-0.335066	0.0505978	0.644078	-1.18353	-1.75017	-0.234246	0.0553525	0.467593	0.0117674	0.0143623	-0.677941	0.0837622	-0.0324836	-0.305997	-0.0125964	0.56095	-0.0201432	0.39235	0.376054	0.793089	1.61168
-317.92	-1.22196	-0.2985	0.0314117	0.645801	-1.21265	-1.70483	-0.244863	0.0490482	0.501138	-0.012488	0.00589498	-0.651533	0.0937583	-0.032296	-0.269055	-0.0194634	0.572134	-0.0202991	0.390394	0.366734	0.797132	1.62068
-317.44	-1.19622	-0.25509	0.0108192	0.650715	-1.23244	-1.67057	-0.258716	0.0511594	0.555614	-0.0128117	0.00189314	-0.617315	0.100009	-0.0216046	-0.239249	-0.0278739	0.580353	-0.0194766	0.389601	0.361761	0.794247	1.6353
-316.96	-1.15953	-0.212573	-0.0057288	0.664224	-1.2388	-1.64025	-0.273266	0.0597532	0.619804	0.00448228	-0.0112706	-0.578333	0.100653	-0.00128508	-0.217309	-0.0404881	0.584625	-0.0136783	0.395119	0.358268	0.782728	1.65228
-316.48	-1.1158	-0.173864	-0.013049	0.690536	-1.23116	-1.6032	-0.283339	0.0717113	0.676027	0.0266663	-0.0383715	-0.541507	0.0983688	0.0267532	-0.203125	-0.0602059	0.583445	0.00106073	0.409242	0.353703	0.760117	1.66683
-316	-1.07313	-0.140902	-0.0151622	0.721639	-1.21311	-1.55564	-0.28618	0.0831086	0.710896	0.0439048	-0.0769916	-0.513155	0.0965177	0.0606649	-0.195755	-0.0913521	0.576206	0.0252543	0.431605	0.348246	0.736713	1.67645
-315.52	-1.04194	-0.111965	-0.0198776	0.752562	-1.18992	-1.49832	-0.279444	0.0921804	0.730381	0.0562729	-0.113284	-0.492431	0.0970682	0.0937997	-0.188322	-0.133513	0.566292	0.0524281	0.460388	0.315683	0.721551	1.67996
-315.04	-1.02588	-0.0901386	-0.0401319	0.778946	-1.1641	-1.4263	-0.266214	0.0996412	0.750324	0.0710518	-0.13795	-0.470954	0.101096	0.118882	-0.173788	-0.180303	0.559523	0.0750378	0.491532	0.314273	0.717267	1.68255
-314.56	-1.02866	-0.0760081	-0.0821812	0.801417	-1.13747	-1.33499	-0.246721	0.106109	0.79259	0.0944487	-0.139366	-0.438035	0.106904	0.128513	-0.150219	-0.221276	0.561867	0.0854877	0.52092	0.319207	0.725086	1.6916
-314.08	-1.04643	-0.0693685	-0.149904	0.818854	-1.10931	-1.2191	-0.225106	0.111237	0.861612	0.123944	-0.114346	-0.389767	0.11268	0.120269	-0.122449	-0.249766	0.575272	0.0827418	0.544098	0.329699	0.742465	1.70848
-313.6	-1.0748	-0.0667311	-0.238572	0.822916	-1.08225	-1.08114	-0.199382	0.112109	0.944503	0.150769	-0.0675398	-0.336118	0.116465	0.100323	-0.0977471	-0.260123	0.596168	0.069576	0.5577	0.34278	0.766692	1.73123
-313.12	-1.10866	-0.0608193	-0.333976	0.80652	-1.05786	-0.937111	-0.170828	0.108561	1.01913	0.16526	-0.00314005	-0.294758	0.115237	0.0776368	-0.0837435	-0.254921	0.616791	0.0514642	0.559008	0.353625	0.794007	1.75419
-312.64	-1.14251	-0.0451079	-0.421956	0.762579	-1.03777	-0.807394	-0.1376	0.103643	1.06231	0.166367	0.0674771	-0.283907	0.105126	0.0620423	-0.0816645	-0.239672	0.629566	0.0333173	0.548867	0.356419	0.823187	1.77166
-312.16	-1.17549	-0.0177048	-0.493064	0.690626	-1.02233	-0.713114	-0.101667	0.104572	1.07231	0.166504	0.130965	-0.308101	0.0851508	0.0598321	-0.0856857	-0.220846	0.631288	0.0177113	0.53149	0.353714	0.851883	1.7815
-311.68	-1.20285	0.0203714	-0.545072	0.606245	-1.00696	-0.670474	-0.0615204	0.117473	1.05605	0.181404	0.173727	-0.358286	0.0569045	0.0837023	-0.0919248	-0.207988	0.623896	0.00668395	0.513544	0.348348	0.879187	1.78521
-311.2	-1.22346	0.0638914	-0.583442	0.526294	-0.98353	-0.676287	-0.0141357	0.142907	1.02903	0.217334	0.185126	-0.416216	0.0266712	0.100897	-0.097019	-0.206353	0.614017	0.00238038	0.502793	0.346367	0.907335	1.78874
-310.72	-1.23685	0.111118	-0.610798	0.471137	-0.946067	-0.710385	0.0402932	0.175491	1.00184	0.268583	0.163051	-0.468112	-0.000111261	0.122434	-0.101988	-0.219616	0.608884	0.00726446	0.501868	0.350184	0.942055	1.79342
-310.24	-1.24212	0.15728	-0.628882	0.449664	-0.895301	-0.746576	0.102805	0.206584	0.978072	0.32025	0.113729	-0.50731	-0.0163843	0.141987	-0.110421	-0.243986	0.614228	0.0210123	0.510158	0.358941	0.989504	1.80066
-309.76	-1.24178	0.20168	-0.638035	0.456963	-0.835193	-0.7553	0.17239	0.230584	0.953045	0.354246	0.0619116	-0.534856	-0.0217159	0.153201	-0.119655	-0.270826	0.633405	0.0402091	0.522067	0.369852	1.05093	1.80801
-309.28	-1.24088	0.2453	-0.640041	0.479319	-0.771854	-0.729083	0.242704	0.248859	0.920963	0.365587	0.0305159	-0.551218	-0.020914	0.149374	-0.125721	-0.288223	0.663716	0.0607263	0.529982	0.378246	1.11671	1.81298
-308.8	-1.245	0.287108	-0.640041	0.500358	-0.7113	-0.680456	0.310083	0.268234	0.878993	0.362318	0.0436695	-0.554201	-0.0205088	0.129223	-0.119482	-0.288804	0.69905	0.0777821	0.529782	0.384985	1.17259	1.81385
-308.32	-1.261	0.327546	-0.646241	0.510231	-0.653282	-0.636583	0.369787	0.295301	0.830066	0.360057	0.104263	-0.541709	-0.0259152	0.0963742	-0.0969233	-0.274168	0.732578	0.0903205	0.522818	0.391457	1.20902	1.81193
-307.84	-1.29139	0.363269	-0.664928	0.506041	-0.594824	-0.616253	0.42338	0.330339	0.779015	0.370628	0.195781	-0.51585	-0.0386905	0.0605703	-0.0593904	-0.25368	0.75743	0.100312	0.513569	0.399514	1.22232	1.80842
-307.36	-1.33302	0.390033	-0.695066	0.494351	-0.533674	-0.623488	0.473594	0.366388	0.726668	0.391924	0.294547	-0.483981	-0.0571312	0.0288814	-0.0104361	-0.24299	0.771158	0.109337	0.505028	0.407919	1.22408	1.80462
-306.88	-1.37725	0.402747	-0.731736	0.479548	-0.47193	-0.643682	0.52292	0.392377	0.674413	0.410579	0.378539	-0.45728	-0.0772966	0.00593125	0.0429967	-0.251097	0.776979	0.118626	0.497699	0.413847	1.22732	1.80034
-306.4	-1.40807	0.401362	-0.770252	0.462843	-0.413259	-0.65197	0.572184	0.402894	0.620109	0.414561	0.438813	-0.439778	-0.0980946	-0.0118548	0.0978907	-0.27793	0.781056	0.128052	0.488675	0.41412	1.24213	1.79582
-305.92	-1.41393	0.39335	-0.808202	0.445608	-0.363459	-0.632537	0.618843	0.400212	0.563286	0.401449	0.483922	-0.428448	-0.121108	-0.0279756	0.152128	-0.312279	0.788158	0.137669	0.476225	0.409232	1.26504	1.79329
-305.44	-1.38726	0.391679	-0.843812	0.424214	-0.324111	-0.58801	0.664277	0.393973	0.505085	0.382713	0.520034	-0.414168	-0.147914	-0.0420136	0.205185	-0.34054	0.799631	0.147348	0.461756	0.401343	1.28288	1.79441
-304.96	-1.32914	0.403666	-0.876326	0.397427	-0.293437	-0.520175	0.710531	0.396041	0.457342	0.377452	0.547278	-0.391238	-0.17909	-0.0510231	0.255774	-0.353385	0.812645	0.159975	0.449145	0.395581	1.28234	1.79688
-304.48	-1.25031	0.429595	-0.906101	0.366936	-0.264941	-0.440574	0.76	0.412236	0.423812	0.399481	0.552099	-0.364177	-0.21309	-0.0506624	0.30336	-0.352611	0.823873	0.174229	0.442571	0.395208	1.25911	1.79634
-304	-1.16355	0.459037	-0.928157	0.333071	-0.235795	-0.348145	0.812459	0.440245	0.40734	0.449972	0.522964	-0.340446	-0.248057	-0.0447861	0.34697	-0.344042	0.832756	0.187087	0.442614	0.399907	1.21761	1.78886
-303.52	-1.08616	0.479673	-0.941501	0.299497	-0.205803	-0.252542	0.867828	0.47298	0.406002	0.517693	0.459308	-0.326223	-0.282279	-0.0418126	0.386312	-0.338	0.842968	0.194798	0.44602	0.408946	1.16892	1.77006
-303.04	-1.02943	0.483604	-0.943242	0.268561	-0.176614	-0.169918	0.92149	0.501628	0.413793	0.58605	0.368003	-0.318714	-0.316882	-0.0512632	0.422787	-0.336206	0.858307	0.195205	0.449355	0.418583	1.12077	1.74099
-302.56	-0.99952	0.474924	-0.935377	0.244957	-0.154857	-0.128001	0.966559	0.521015	0.421083	0.644453	0.268843	-0.305502	-0.351445	-0.0748726	0.457434	-0.337736	0.879201	0.190833	0.450736	0.427118	1.0774	1.70781
-302.08	-0.99819	0.464903	-0.91512	0.230578	-0.144615	-0.148241	1.00248	0.529705	0.425599	0.684968	0.177649	-0.273556	-0.383748	-0.104228	0.493612	-0.334318	0.902291	0.189588	0.451506	0.43514	1.03313	1.6764
-301.6	-1.00908	0.463123	-0.878995	0.228875	-0.142815	-0.229677	1.02961	0.528018	0.425089	0.709213	0.103177	-0.21926	-0.406926	-0.125449	0.533202	-0.322451	0.920941	0.197118	0.456799	0.442956	0.987141	1.64861
-301.12	-1.01054	0.471157	-0.827539	0.244305	-0.145918	-0.340854	1.05429	0.517362	0.419872	0.717478	0.0519641	-0.15125	-0.414463	-0.128411	0.575005	-0.302018	0.930138	0.215777	0.46956	0.45076	0.94288	1.62523
-300.64	-0.984275	0.483964	-0.763324	0.270972	-0.152285	-0.443674	1.07849	0.499708	0.416113	0.712403	0.0241293	-0.0839641	-0.406709	-0.111217	0.617224	-0.278129	0.929521	0.240059	0.489886	0.459147	0.907487	1.60337
-300.16	-0.916837	0.492871	-0.697706	0.304971	-0.15804	-0.513382	1.1047	0.478621	0.416208	0.699022	0.0230245	-0.0286928	-0.389303	-0.0803011	0.656749	-0.257644	0.924816	0.26187	0.515051	0.466749	0.884599	1.5814
-299.68	-0.81697	0.494076	-0.641642	0.338366	-0.163535	-0.560919	1.12658	0.459281	0.423874	0.687009	0.0441447	0.0111888	-0.372195	-0.0450173	0.692595	-0.245733	0.924277	0.275231	0.541168	0.469985	0.873627	1.56162
-299.2	-0.707301	0.485654	-0.602905	0.364807	-0.168323	-0.61222	1.13831	0.445863	0.439492	0.685742	0.0751045	0.0404834	-0.364389	-0.0110734	0.730833	-0.242603	0.933538	0.269189	0.565031	0.467798	0.870179	1.54818
-298.72	-0.604469	0.470802	-0.578475	0.385731	-0.16944	-0.690352	1.13322	0.438188	0.461057	0.700434	0.0936398	0.0623822	-0.368711	0.0207106	0.780599	-0.24334	0.953614	0.27535	0.586422	0.456034	0.863342	1.54219
-298.24	-0.524903	0.447686	-0.558664	0.405946	-0.163836	-0.785471	1.11667	0.430861	0.486922	0.719481	0.0814576	0.0758552	-0.383173	0.0487018	0.847567	-0.242032	0.977964	0.287028	0.605364	0.434939	0.852487	1.54455
-297.76	-0.464415	0.417317	-0.531402	0.4372	-0.150034	-0.870942	1.09284	0.417954	0.514812	0.726922	0.0289783	0.076264	-0.405047	0.0712427	0.926121	-0.236521	0.995694	0.30604	0.622509	0.407005	0.839131	1.5497
-297.28	-0.410212	0.379704	-0.492823	0.489554	-0.128183	-0.911032	1.07046	0.396339	0.546598	0.708338	-0.050126	0.0628386	-0.430362	0.0857037	1.00137	-0.227404	0.997391	0.32844	0.63683	0.376507	0.826812	1.55453
-296.8	-0.357565	0.341701	-0.449492	0.568162	-0.105487	-0.894372	1.05206	0.369382	0.587405	0.659803	-0.122563	0.0390962	-0.455071	0.0920742	1.05374	-0.218102	0.979218	0.345942	0.646723	0.35033	0.817628	1.55769
-296.32	-0.305187	0.31007	-0.411017	0.666499	-0.089146	-0.839184	1.03513	0.345531	0.638554	0.594521	-0.15895	0.0112281	-0.474344	0.0943133	1.07376	-0.213406	0.945521	0.353973	0.6493	0.333667	0.811318	1.56158
-295.84	-0.257724	0.284913	-0.384476	0.763525	-0.0854253	-0.77507	1.01886	0.332093	0.695858	0.532551	-0.144622	-0.0167297	-0.479528	0.0986804	1.06172	-0.215009	0.906477	0.350645	0.644617	0.328309	0.808998	1.57018
-295.36	-0.21914	0.263185	-0.3674	0.834742	-0.0973563	-0.725672	1.00365	0.329956	0.751996	0.487995	-0.0830734	-0.0429402	-0.465739	0.10646	1.03299	-0.218546	0.872468	0.339536	0.635496	0.333015	0.813839	1.5867
-294.88	-0.192382	0.234225	-0.354717	0.864484	-0.12251	-0.689877	0.997975	0.333769	0.798719	0.461354	-0.00745897	-0.0691038	-0.431988	0.115345	1.00448	-0.216709	0.849987	0.326157	0.623575	0.342153	0.826557	1.61111
-294.4	-0.177976	0.19203	-0.343053	0.850139	-0.155801	-0.662615	1.00768	0.335585	0.832307	0.441906	0.0601676	-0.0909053	-0.38643	0.116158	0.985677	-0.202366	0.840408	0.314471	0.609854	0.35099	0.85099	1.63958
-293.92	-0.17397	0.140199	-0.332509	0.811139	-0.190806	-0.637191	1.03318	0.331264	0.854425	0.41168	0.0981398	-0.103952	-0.3414	0.102145	0.976091	-0.176663	0.840497	0.305779	0.594259	0.356098	0.887552	1.66524
-293.44	-0.177269	0.0909174	-0.326027	0.775168	-0.223516	-0.616499	1.06542	0.321994	0.872491	0.362977	0.11106	-0.0984734	-0.306678	0.0725637	0.968608	-0.147197	0.847396	0.299217	0.574661	0.355493	0.932749	1.68289
-292.96	-0.189019	0.0517459	-0.326085	0.765183	-0.253036	-0.60323	1.0932	0.313366	0.887039	0.295048	0.106133	-0.0707222	-0.286341	0.0321613	0.95611	-0.123659	0.857689	0.291439	0.548757	0.354375	0.981847	1.69096
-292.48	-0.203141	0.0249598	-0.333735	0.782974	-0.279352	-0.597553	1.10803	0.309998	0.902094	0.220182	0.0943421	-0.0251262	-0.276186	-0.00815275	0.934885	-0.114614	0.868899	0.280505	0.518549	0.356763	1.03138	1.69296
-292	-0.212357	0.00582348	-0.347062	0.823435	-0.304891	-0.587369	1.11282	0.313019	0.919773	0.152811	0.0839994	0.0295765	-0.271118	-0.0394934	0.905624	-0.11944	0.875578	0.267369	0.486409	0.366958	1.07901	1.69197
-291.52	-0.210533	-0.0139958	-0.367673	0.873152	-0.329845	-0.56056	1.11664	0.320465	0.947634	0.102521	0.079665	0.0880928	-0.267901	-0.0548694	0.868287	-0.129968	0.872818	0.253721	0.456147	0.382488	1.12222	1.69075
-291.04	-0.198069	-0.0337157	-0.397509	0.926116	-0.352761	-0.515243	1.12643	0.32924	0.996808	0.0750211	0.0821607	0.147185	-0.266435	-0.0537671	0.822126	-0.136783	0.857568	0.243633	0.429248	0.40002	1.15864	1.69058
-290.56	-0.181741	-0.0492586	-0.439242	0.979951	-0.371995	-0.459299	1.13894	0.338257	1.07368	0.0665462	0.0997411	0.205272	-0.268008	-0.0413964	0.766271	-0.133245	0.832852	0.239941	0.407826	0.416534	1.18745	1.69098
-290.08	-0.173818	-0.0539491	-0.492831	1.03276	-0.382592	-0.404488	1.14614	0.347084	1.1731	0.0668416	0.133824	0.256764	-0.270696	-0.0237172	0.701973	-0.11767	0.806828	0.244134	0.39007	0.431796	1.20898	1.69102
-289.6	-0.179219	-0.0467414	-0.552363	1.07585	-0.383466	-0.351333	1.14136	0.355998	1.27219	0.0667548	0.176736	0.294497	-0.269672	-0.00356619	0.636511	-0.0938778	0.787091	0.254129	0.374567	0.450296	1.22902	1.69232
-289.12	-0.20309	-0.0353672	-0.613961	1.09717	-0.375271	-0.292605	1.1234	0.361733	1.35161	0.0544315	0.21949	0.316814	-0.258369	0.0198731	0.580292	-0.0663743	0.775577	0.264816	0.362947	0.474507	1.25169	1.69655
-288.64	-0.240232	-0.0273739	-0.672466	1.09322	-0.363664	-0.217768	1.10016	0.361504	1.40016	0.0252201	0.251336	0.329492	-0.235015	0.0520449	0.542746	-0.0382836	0.769164	0.271776	0.355429	0.504405	1.27522	1.70367
-288.16	-0.284184	-0.0278167	-0.72587	1.07134	-0.351952	-0.12514	1.08359	0.354445	1.42555	-0.0183155	0.269222	0.34233	-0.203259	0.0969601	0.526726	-0.00787072	0.762888	0.273019	0.353471	0.534222	1.29655	1.71121
-287.68	-0.326242	-0.0344475	-0.775272	1.05522	-0.346338	-0.0210113	1.07841	0.342538	1.43909	-0.06477	0.27955	0.367686	-0.170622	0.151668	0.527138	0.0287192	0.755289	0.270106	0.358798	0.554546	1.30786	1.71595
-287.2	-0.369699	-0.0431747	-0.819086	1.0674	-0.345753	0.0834997	1.07959	0.329478	1.45098	-0.103441	0.29382	0.405284	-0.144214	0.205956	0.534679	0.0723127	0.74945	0.266199	0.385543	0.560551	1.30493	1.71442
-286.72	-0.421269	-0.0493671	-0.852848	1.11159	-0.346473	0.176817	1.07913	0.318628	1.46528	-0.128295	0.303374	0.449916	-0.129259	0.247144	0.539052	0.119625	0.751423	0.265187	0.414886	0.554542	1.28803	1.70538
-286.24	-0.489917	-0.0564554	-0.875309	1.17144	-0.342736	0.261322	1.07235	0.309761	1.47887	-0.142421	0.300012	0.486191	-0.125649	0.266807	0.534637	0.163057	0.761359	0.267245	0.453348	0.545051	1.263	1.69445
-285.76	-0.580398	-0.0678357	-0.88264	1.22226	-0.33039	0.344747	1.05781	0.301368	1.49049	-0.15396	0.275952	0.50664	-0.130663	0.266794	0.522356	0.196273	0.772124	0.270095	0.497251	0.540778	1.23453	1.68727
-285.28	-0.690857	-0.0842545	-0.88124	1.24968	-0.307066	0.435275	1.04511	0.291467	1.50547	-0.172291	0.236096	0.511834	-0.140378	0.258232	0.508921	0.215727	0.774362	0.270979	0.539787	0.543616	1.20579	1.68601
-284.8	-0.809144	-0.100545	-0.875928	1.2606	-0.279775	0.532437	1.03913	0.281508	1.52952	-0.199206	0.200625	0.508829	-0.149165	0.252802	0.499892	0.221482	0.763547	0.269867	0.572396	0.551712	1.1783	1.69069
-284.32	-0.924154	-0.107861	-0.871679	1.27748	-0.255619	0.629298	1.04051	0.273918	1.5642	-0.228481	0.194459	0.501096	-0.152572	0.258425	0.495835	0.218299	0.744241	0.269931	0.589448	0.556511	1.15246	1.69549
-283.84	-1.02847	-0.0999878	-0.87067	1.32401	-0.23975	0.719484	1.04238	0.270845	1.60157	-0.250679	0.227001	0.487123	-0.1468	0.272414	0.495341	0.211721	0.728325	0.27282	0.590954	0.555088	1.12859	1.6954
-283.36	-1.12402	-0.0763072	-0.869945	1.40587	-0.234312	0.792037	1.03887	0.271345	1.63556	-0.25953	0.289053	0.462317	-0.133144	0.286878	0.491979	0.203785	0.725233	0.280242	0.58241	0.546649	1.10336	1.68701
-282.88	-1.21476	-0.042395	-0.866456	1.50657	-0.232811	0.832335	1.0256	0.272184	1.66099	-0.255141	0.355492	0.431389	-0.117168	0.295987	0.48262	0.1934	0.748829	0.289581	0.570879	0.536615	1.07345	1.67205
-282.4	-1.30173	-0.00600405	-0.855792	1.59329	-0.228014	0.83642	1.00498	0.269496	1.6807	-0.246203	0.406616	0.406088	-0.106342	0.298505	0.468704	0.179522	0.773671	0.297559	0.560693	0.528173	1.03687	1.65666
-281.92	-1.38323	0.0238886	-0.841738	1.64407	-0.211323	0.807959	0.98037	0.261657	1.69563	-0.241302	0.427497	0.401424	-0.10644	0.297288	0.453356	0.160246	0.801514	0.303042	0.551832	0.523691	0.994413	1.64611
-281.44	-1.44967	0.0422208	-0.829083	1.65579	-0.184822	0.758798	0.955521	0.250806	1.70507	-0.244317	0.429002	0.427398	-0.116751	0.295264	0.438474	0.138937	0.8265	0.304766	0.540331	0.521249	0.952217	1.64404
-280.96	-1.49302	0.0432311	-0.827691	1.64153	-0.154374	0.710363	0.935601	0.240136	1.6998	-0.255191	0.419821	0.473963	-0.131423	0.292251	0.426628	0.120513	0.843663	0.305002	0.520276	0.51764	0.918488	1.65285
-280.48	-1.51473	0.0247502	-0.844941	1.62109	-0.125941	0.674829	0.918181	0.232092	1.67644	-0.268794	0.408838	0.523711	-0.143137	0.281723	0.416167	0.109072	0.852507	0.305473	0.492415	0.511961	0.896993	1.67014
-280	-1.52522	-0.00795861	-0.87864	1.6055	-0.103966	0.656959	0.904806	0.227035	1.6446	-0.281482	0.39855	0.558603	-0.148636	0.257666	0.410269	0.106182	0.85176	0.307113	0.460602	0.505606	0.88626	1.69077
-279.52	-1.53861	-0.044066	-0.919324	1.59492	-0.0883241	0.649626	0.893431	0.224499	1.61994	-0.291902	0.385616	0.57248	-0.152506	0.217533	0.413376	0.109547	0.841926	0.310497	0.431345	0.501991	0.879631	1.71255
-279.04	-1.56131	-0.0711182	-0.956006	1.58399	-0.0759271	0.644076	0.881057	0.223841	1.61735	-0.300133	0.373174	0.568717	-0.161339	0.162381	0.427286	0.115921	0.825061	0.317433	0.41034	0.503059	0.87423	1.73112
-278.56	-1.58573	-0.0803297	-0.979117	1.56871	-0.108864	0.634005	0.864421	0.2251	1.63723	-0.306155	0.364452	0.557759	-0.176917	0.102244	0.450588	0.119747	0.80344	0.331306	0.397587	0.511722	0.87081	1.74711
-278.08	-1.59576	-0.0724511	-0.987007	1.55162	-0.0893192	0.61489	0.842566	0.229795	1.65896	-0.306063	0.362459	0.545658	-0.193815	0.0506119	0.480512	0.117027	0.781036	0.352887	0.3906	0.528764	0.871226	1.76102
-277.6	-1.58368	-0.0572697	-0.986761	1.53088	-0.0653056	0.581947	0.816881	0.236631	1.66264	-0.297199	0.366519	0.532206	-0.200559	0.0185643	0.512929	0.1044	0.760466	0.381843	0.38496	0.552091	0.877082	1.77504
-277.12	-1.5522	-0.0471522	-0.985362	1.50427	-0.0393547	0.538597	0.794034	0.241441	1.63923	-0.27831	0.376125	0.516285	-0.188532	0.0111913	0.543958	0.0823046	0.742494	0.41368	0.377569	0.577014	0.882342	1.78755
-276.64	-1.51972	-0.0474896	-0.986293	1.46592	-0.0143655	0.490955	0.778136	0.243149	1.59376	-0.254057	0.390997	0.501762	-0.157178	0.025223	0.573424	0.0548947	0.729056	0.441966	0.36639	0.598236	0.874857	1.79731
-276.16	-1.50616	-0.0545606	-0.987986	1.4131	0.00414611	0.450103	0.766723	0.241765	1.54466	-0.230877	0.412921	0.498935	-0.115467	0.0491095	0.599986	0.0337918	0.721947	0.46036	0.350768	0.610392	0.850879	1.80079
-275.68	-1.51811	-0.0531154	-0.984775	1.35427	0.0119287	0.428939	0.755454	0.240145	1.50288	-0.21778	0.437972	0.519522	-0.0770091	0.0713757	0.62158	0.0293008	0.725015	0.466898	0.330537	0.613647	0.810415	1.79879
-275.2	-1.54385	-0.0320647	-0.976127	1.30867	0.00947604	0.430885	0.737227	0.24222	1.4697	-0.217361	0.461181	0.559475	-0.0496022	0.0852595	0.634615	0.0490678	0.739697	0.462005	0.306965	0.609247	0.764596	1.79332
-274.72	-1.56341	0.0128612	-0.962573	1.29825	0.000646842	0.44371	0.708804	0.24838	1.44242	-0.231837	0.469867	0.606248	-0.0316343	0.0909774	0.638828	0.0893346	0.76217	0.448343	0.281596	0.601764	0.724354	1.78881
-274.24	-1.55607	0.0734462	-0.947916	1.33494	-0.00799723	0.44907	0.673352	0.255983	1.42655	-0.258493	0.458738	0.645335	-0.0172304	0.0946755	0.639549	0.143283	0.785395	0.429714	0.258885	0.593843	0.695609	1.78668
-273.76	-1.51934	0.13467	-0.932249	1.4102	-0.0105258	0.443363	0.636059	0.258025	1.42937	-0.290825	0.431289	0.666384	-0.000271992	0.10329	0.645868	0.197381	0.802065	0.40951	0.242623	0.586149	0.6746	1.7851
-273.28	-1.46907	0.185686	-0.91515	1.50218	-0.0063798	0.448222	0.600074	0.248327	1.51192	-0.323353	0.394145	0.673977	0.0170613	0.119252	0.665799	0.242887	0.808526	0.389988	0.234759	0.577195	0.65778	1.7803
-272.8	-1.42455	0.221243	-0.897556	1.58424	0.00450298	0.495641	0.566285	0.225979	1.5475	-0.348681	0.36083	0.680184	0.0290227	0.141244	0.702668	0.274385	0.805236	0.373013	0.23335	0.566591	0.640413	1.76864
-272.32	-1.39335	0.244048	-0.882162	1.63878	0.0190791	0.601385	0.530963	0.195057	1.58057	-0.35953	0.341676	0.693786	0.0307359	0.165759	0.75335	0.292775	0.793894	0.359021	0.238305	0.554514	0.621653	1.74965
-271.84	-1.37608	0.261104	-0.874429	1.65551	0.0320527	0.751235	0.495356	0.161886	1.59022	-0.351675	0.343721	0.715948	0.0235822	0.18965	0.813623	0.299047	0.774909	0.348555	0.248837	0.544872	0.606062	1.72591
-271.36	-1.36363	0.277856	-0.878127	1.64038	0.0410508	0.894131	0.463009	0.131145	1.57017	-0.325591	0.361984	0.739913	0.0166876	0.208906	0.878476	0.296238	0.747313	0.344763	0.266353	0.541203	0.598108	1.70209
-270.88	-1.35268	0.299597	-0.892271	1.60512	0.041686	0.976069	0.435003	0.104592	1.53187	-0.286721	0.388462	0.7576	0.0195983	0.2201	0.943276	0.28598	0.711902	0.349123	0.292552	0.544714	0.595235	1.68092
-270.4	-1.34598	0.331665	-0.910813	1.56372	0.0335429	0.974187	0.412175	0.081726	1.49373	-0.24303	0.405174	0.768249	0.035845	0.218082	1.00226	0.269163	0.67481	0.36211	0.326552	0.553115	0.595217	1.66217
-269.92	-1.3516	0.37464	-0.92524	1.52831	0.0204152	0.895561	0.389089	0.0610599	1.47301	-0.202948	0.397739	0.775741	0.0605586	0.197422	1.04946	0.247852	0.645566	0.378935	0.362619	0.562591	0.593895	1.64345
-269.44	-1.374	0.425643	-0.928729	1.50721	0.0103646	0.77951	0.357416	0.0439919	1.47041	-0.173642	0.36184	0.788424	0.0837539	0.160881	1.07979	0.223945	0.631462	0.393142	0.393611	0.569481	0.590864	1.62421
-268.96	-1.4099	0.478604	-0.920284	1.4994	0.0112991	0.657831	0.317859	0.0331767	1.47578	-0.156676	0.303635	0.813915	0.0964892	0.116589	1.09481	0.201168	0.63255	0.397559	0.413192	0.571982	0.58425	1.60311
-268.48	-1.44954	0.531094	-0.898698	1.49729	0.0284478	0.541699	0.276339	0.0303571	1.47859	-0.153819	0.245998	0.853026	0.0957903	0.0796181	1.10659	0.182611	0.641671	0.389643	0.420739	0.57004	0.576753	1.5831
-268	-1.48231	0.584145	-0.865158	1.49593	0.0589604	0.42774	0.247658	0.0334473	1.47204	-0.163611	0.213194	0.900479	0.0861941	0.0644564	1.13067	0.174013	0.647477	0.372852	0.417756	0.562395	0.570774	1.56462
-267.52	-1.50574	0.64542	-0.819031	1.49369	0.0947268	0.313729	0.242468	0.0363906	1.45997	-0.183518	0.214041	0.950741	0.0746557	0.0730888	1.17341	0.178056	0.645558	0.354541	0.40738	0.54969	0.568349	1.54877
-267.04	-1.52513	0.721807	-0.762843	1.49593	0.124776	0.214215	0.262727	0.0324069	1.44915	-0.210438	0.237885	0.996348	0.0684109	0.0969219	1.22916	0.198584	0.638134	0.341747	0.391282	0.532233	0.572737	1.53532
-266.56	-1.54257	0.812792	-0.703568	1.51387	0.144174	0.148554	0.302227	0.0191633	1.43983	-0.237542	0.257197	1.02988	0.0706338	0.11849	1.28	0.228938	0.634244	0.336901	0.370043	0.511435	0.584679	1.52389
-266.08	-1.55654	0.908637	-0.653395	1.54775	0.15446	0.134312	0.346518	-2.73494e-05	1.42675	-0.257902	0.252413	1.04986	0.0793643	0.124187	1.30975	0.264892	0.638963	0.335806	0.344484	0.492764	0.603108	1.51461
-265.6	-1.56475	0.994436	-0.618978	1.58294	0.159571	0.169573	0.384145	-0.0170868	1.40506	-0.266886	0.220707	1.05598	0.0924958	0.109718	1.31122	0.298347	0.653195	0.331908	0.316114	0.481602	0.623313	1.5085
-265.12	-1.56416	1.05729	-0.601813	1.59868	0.16316	0.238047	0.4086	-0.0243061	1.37096	-0.263714	0.183155	1.05037	0.107886	0.0817643	1.295	0.323789	0.672785	0.321549	0.288247	0.483683	0.641755	1.50636
-264.64	-1.55542	1.09986	-0.593177	1.58096	0.167313	0.312273	0.418712	-0.0191769	1.32595	-0.253369	0.164496	1.03855	0.125846	0.0506407	1.2827	0.340659	0.694362	0.306339	0.265341	0.500115	0.655242	1.51134
-264.16	-1.53682	1.13729	-0.579745	1.53614	0.169473	0.370952	0.416783	-0.00446506	1.26957	-0.244507	0.174456	1.02386	0.148003	0.0247389	1.28929	0.349046	0.720101	0.291785	0.249766	0.528237	0.662258	1.52481
-263.68	-1.50842	1.18188	-0.550668	1.48726	0.168194	0.396543	0.407459	0.0130733	1.20201	-0.246076	0.205111	1.01253	0.174395	0.00719843	1.31814	0.35365	0.751455	0.284474	0.240054	0.560973	0.664344	1.54675
-263.2	-1.46784	1.23616	-0.508915	1.45963	0.163578	0.381744	0.39172	0.0279562	1.12667	-0.263168	0.237093	1.00744	0.201965	-0.00564687	1.35615	0.356549	0.786993	0.286373	0.233057	0.591032	0.660553	1.57174
-262.72	-1.41238	1.29164	-0.465564	1.46705	0.158978	0.328457	0.37113	0.0370505	1.05064	-0.298361	0.257791	1.01143	0.228389	-0.0156615	1.38761	0.361311	0.819621	0.296618	0.222766	0.614692	0.65023	1.59336
-262.24	-1.3429	1.33556	-0.437377	1.49803	0.154109	0.254498	0.34922	0.0418746	0.986895	-0.350036	0.268624	1.02663	0.250851	-0.0239869	1.40149	0.368849	0.841515	0.310501	0.20687	0.632731	0.634677	1.60576
-261.76	-1.26564	1.35695	-0.43106	1.52901	0.149952	0.19267	0.330654	0.0447236	0.951134	-0.411747	0.285008	1.05219	0.27137	-0.0295358	1.39841	0.376107	0.850207	0.324171	0.185746	0.646375	0.620265	1.60871
-261.28	-1.19212	1.35843	-0.44174	1.54054	0.143288	0.170382	0.323659	0.0462868	0.947334	-0.476427	0.319392	1.0818	0.291499	-0.0336131	1.38795	0.380426	0.853107	0.334873	0.164746	0.657856	0.610689	1.60543
-260.8	-1.13109	1.34786	-0.454774	1.52574	0.132636	0.197063	0.330367	0.046414	0.968286	-0.535083	0.373169	1.10313	0.311874	-0.0387934	1.38303	0.379347	0.861663	0.341844	0.150244	0.667592	0.611547	1.6026
-260.32	-1.09384	1.33319	-0.4565	1.49145	0.117546	0.258559	0.35142	0.0429968	0.999141	-0.580077	0.435617	1.10711	0.331817	-0.0464414	1.39103	0.374036	0.883446	0.34577	0.148119	0.674064	0.622753	1.60475
-259.84	-1.08353	1.31865	-0.442564	1.45156	0.101146	0.319112	0.381447	0.0340365	1.02387	-0.604348	0.491483	1.09075	0.349995	-0.0539747	1.40765	0.368954	0.914856	0.34752	0.158744	0.674809	0.640772	1.61212
-259.36	-1.10075	1.30335	-0.423478	1.41498	0.0850865	0.34157	0.41346	0.0202498	1.03113	-0.605878	0.530795	1.05705	0.367985	-0.0560535	1.42065	0.373837	0.944236	0.348879	0.176306	0.669765	0.657863	1.62178
-258.88	-1.14484	1.28772	-0.410002	1.37636	0.0716572	0.314497	0.440136	0.00429675	1.01945	-0.585073	0.556145	1.01875	0.386239	-0.0478803	1.4137	0.393985	0.961338	0.350922	0.190251	0.658902	0.671473	1.63023
-258.4	-1.20466	1.27329	-0.4092	1.33584	0.0627335	0.248493	0.460769	-0.0101091	0.990491	-0.545562	0.579681	0.983541	0.405534	-0.0291667	1.37628	0.431212	0.963818	0.353059	0.1913	0.646209	0.68288	1.63568
-257.92	-1.26724	1.25884	-0.415464	1.29255	0.0556972	0.16792	0.476398	-0.019118	0.947434	-0.491763	0.606934	0.952113	0.422698	-0.00349498	1.30965	0.479664	0.95857	0.354552	0.17561	0.634171	0.697712	1.63864
-257.44	-1.32069	1.24223	-0.416689	1.25279	0.0515589	0.0944119	0.493759	-0.0219178	0.887508	-0.430716	0.64655	0.922252	0.431275	0.0241617	1.22612	0.526122	0.954929	0.353446	0.147491	0.625489	0.719263	1.6402
-256.96	-1.36406	1.2182	-0.40094	1.22381	0.0482433	0.0332991	0.513838	-0.0202203	0.813028	-0.371103	0.693323	0.88688	0.427339	0.0516553	1.14126	0.563589	0.958536	0.347223	0.11498	0.621428	0.746642	1.64026
-256.48	-1.39802	1.18232	-0.3677	1.20311	0.0477809	-0.0214961	0.535975	-0.0172135	0.721944	-0.320695	0.736836	0.84685	0.412877	0.078978	1.06564	0.588677	0.967676	0.335251	0.0849773	0.620971	0.774562	1.63879
-256	-1.4307	1.14062	-0.324012	1.18555	0.0505998	-0.0783036	0.552332	-0.0153923	0.619442	-0.280529	0.762242	0.807393	0.396768	0.107552	1.00228	0.606618	0.976455	0.32003	0.0589679	0.624215	0.799025	1.6375
-255.52	-1.46887	1.10775	-0.278832	1.16098	0.0570441	-0.142893	0.556183	-0.0146251	0.519376	-0.249973	0.761534	0.775381	0.389391	0.137837	0.948113	0.624627	0.979904	0.305322	0.0324911	0.631018	0.815756	1.63674
-255.04	-1.51054	1.09475	-0.238026	1.13184	0.0640464	-0.213339	0.545847	-0.0115311	0.433433	-0.221056	0.73641	0.756865	0.394116	0.166459	0.897922	0.651278	0.978643	0.294344	-0.000166423	0.640931	0.830158	1.63665
-254.56	-1.54596	1.10946	-0.204695	1.10526	0.0674302	-0.284568	0.523968	-0.00174517	0.376021	-0.187696	0.702085	0.747578	0.405398	0.191537	0.852781	0.685753	0.976528	0.287534	-0.0400807	0.652012	0.845861	1.63706
-254.08	-1.56731	1.14102	-0.179156	1.08945	0.0632039	-0.347705	0.501789	0.0151783	0.352228	-0.15237	0.672922	0.74148	0.412551	0.211621	0.815796	0.723935	0.978263	0.282238	-0.0819587	0.662027	0.862006	1.63244
-253.6	-1.56437	1.17541	-0.161999	1.09054	0.0527107	-0.390557	0.488974	0.0364165	0.35659	-0.121851	0.655958	0.733588	0.408787	0.229171	0.789729	0.756114	0.986439	0.275564	-0.11921	0.668559	0.876326	1.62042
-253.12	-1.53739	1.19977	-0.155458	1.10392	0.0389432	-0.401191	0.492076	0.0552619	0.380077	-0.104664	0.64495	0.721823	0.397743	0.244993	0.769142	0.772607	1.00024	0.266821	-0.147438	0.669783	0.884677	1.60024
-252.64	-1.48843	1.21109	-0.157988	1.11576	0.0289854	-0.374358	0.509259	0.0668516	0.413297	-0.101078	0.624403	0.70897	0.389827	0.258002	0.7411	0.768919	1.01621	0.259338	-0.166504	0.668368	0.888141	1.57625
-252.16	-1.42363	1.2154	-0.161179	1.11192	0.0266172	-0.32408	0.532177	0.0698225	0.449798	-0.103774	0.580614	0.699865	0.394421	0.267492	0.698413	0.74691	1.02928	0.255879	-0.180367	0.668736	0.890748	1.55304
-251.68	-1.35562	1.22192	-0.156046	1.08852	0.0257253	-0.276316	0.553598	0.0683757	0.487802	-0.0977251	0.512789	0.693206	0.412432	0.272378	0.64107	0.716946	1.03766	0.255928	-0.190742	0.675411	0.898337	1.53584
-251.2	-1.29173	1.23648	-0.135803	1.05126	0.0195509	-0.257405	0.568394	0.069017	0.52972	-0.0699797	0.435337	0.688945	0.434202	0.276593	0.581493	0.693182	1.04391	0.255182	-0.19898	0.690837	0.913924	1.5262
-250.72	-1.24064	1.26206	-0.100599	1.01357	0.000121686	-0.283041	0.578557	0.076833	0.572712	-0.0139497	0.365075	0.683848	0.445985	0.283848	0.533988	0.686553	1.05433	0.246097	-0.20497	0.712289	0.935477	1.52251
-250.24	-1.19972	1.29316	-0.0589315	0.991585	-0.0317999	-0.346895	0.586416	0.0924001	0.607438	0.0664025	0.313568	0.677264	0.439235	0.296747	0.504365	0.699714	1.07756	0.225337	-0.210587	0.733666	0.957846	1.51917
-249.76	-1.1603	1.32815	-0.0196351	0.997253	-0.0675604	-0.431067	0.594165	0.111963	0.625624	0.158945	0.279004	0.669158	0.415417	0.314786	0.487941	0.730025	1.11836	0.196716	-0.220482	0.749243	0.973709	1.5135
-249.28	-1.10363	1.36418	0.00594854	1.03519	-0.095141	-0.521874	0.602091	0.128976	0.616323	0.248786	0.2537	0.65886	0.381314	0.335976	0.474786	0.766015	1.1719	0.167377	-0.238433	0.755208	0.981871	1.50536
-248.8	-1.01444	1.40005	0.0133722	1.09582	-0.106224	-0.606063	0.606717	0.138351	0.575263	0.325924	0.23098	0.646042	0.345217	0.359814	0.457797	0.79684	1.22527	0.145813	-0.264397	0.755246	0.987851	1.49657
-248.32	-0.88804	1.4327	0.00107097	1.16784	-0.102938	-0.68483	0.610523	0.13858	0.513344	0.381392	0.214398	0.634314	0.309188	0.388151	0.437646	0.817049	1.26419	0.13317	-0.295606	0.75093	0.994349	1.49004
-247.84	-0.729967	1.45852	-0.0284749	1.23411	-0.0931597	-0.756174	0.616648	0.133231	0.449014	0.41486	0.206864	0.629624	0.273112	0.423977	0.426351	0.823151	1.28106	0.126108	-0.325661	0.744469	1.00542	1.48433
-247.36	-0.560248	1.47518	-0.0664543	1.2807	-0.0838763	-0.812094	0.629895	0.12808	0.397804	0.427678	0.204404	0.632283	0.236694	0.468207	0.4341	0.818699	1.27777	0.11834	-0.352048	0.736516	1.02489	1.47592
-246.88	-0.397613	1.48	-0.101721	1.29772	-0.0800007	-0.847897	0.651887	0.127882	0.36535	0.424294	0.19351	0.642036	0.203571	0.514702	0.462239	0.807786	1.26468	0.106182	-0.374535	0.72567	1.0519	1.46053
-246.4	-0.258989	1.47716	-0.123794	1.28112	-0.0840179	-0.866857	0.682235	0.135182	0.342779	0.409838	0.162985	0.655392	0.178169	0.554789	0.498249	0.794439	1.25042	0.0890348	-0.395854	0.714235	1.08666	1.43609
-245.92	-0.151589	1.47397	-0.125249	1.23356	-0.0917861	-0.891085	0.716291	0.147874	0.31668	0.386241	0.103145	0.666855	0.163775	0.5812	0.526928	0.779911	1.23715	0.0698455	-0.416599	0.706004	1.12929	1.40514
-245.44	-0.0697327	1.4735	-0.105513	1.17112	-0.102019	-0.947468	0.747732	0.162458	0.272925	0.358709	0.0262426	0.672141	0.157602	0.593197	0.534084	0.766378	1.2178	0.0515034	-0.433513	0.70463	1.17487	1.37408
-244.96	5.10812e-05	1.47781	-0.0682082	1.11106	-0.115124	-1.04332	0.773647	0.173823	0.212914	0.331141	-0.050137	0.672448	0.152341	0.597358	0.516723	0.757098	1.18561	0.0342115	-0.442671	0.709575	1.21918	1.34955
-244.48	0.0662208	1.48388	-0.0182984	1.06557	-0.129181	-1.16921	0.797256	0.178009	0.149837	0.307289	-0.105212	0.671384	0.139671	0.601866	0.482809	0.756783	1.13922	0.0188927	-0.442166	0.717213	1.2564	1.33394
-244	0.136952	1.48647	0.0408248	1.0454	-0.141679	-1.28802	0.81891	0.174881	0.10309	0.287343	-0.137333	0.670307	0.118387	0.610478	0.44332	0.768283	1.08664	0.00657123	-0.434081	0.721242	1.28413	1.32606
-243.52	0.208744	1.48143	0.104227	1.04393	-0.147749	-1.37032	0.837788	0.165601	0.0802923	0.271192	-0.15216	0.669318	0.0908215	0.621513	0.40711	0.787061	1.04119	-0.00124379	-0.425812	0.720764	1.30936	1.32126
-243.04	0.270773	1.4755	0.167905	1.04457	-0.142127	-1.39771	0.849015	0.155439	0.0794183	0.256582	-0.16652	0.663218	0.0645761	0.629033	0.374171	0.80682	1.01266	-0.00417178	-0.422269	0.716741	1.33967	1.31621
-242.56	0.3072	1.4748	0.221238	1.02938	-0.127098	-1.38398	0.850078	0.149826	0.0868547	0.246823	-0.195645	0.650993	0.0465297	0.627365	0.341419	0.818976	1.00211	-0.00400777	-0.423867	0.713476	1.38164	1.31141
-242.08	0.304823	1.48509	0.257914	0.987394	-0.108567	-1.36189	0.841838	0.152861	0.092631	0.248289	-0.244288	0.634299	0.0353579	0.616086	0.30389	0.817415	1.00227	-0.00488847	-0.427245	0.713838	1.43802	1.31006
-241.6	0.262604	1.50724	0.278183	0.924665	-0.0952482	-1.35539	0.828326	0.165586	0.0900726	0.264413	-0.309739	0.619445	0.0273706	0.598951	0.261375	0.805406	1.00355	-0.00910761	-0.427163	0.717847	1.50154	1.31371
-241.12	0.190844	1.5332	0.289271	0.861772	-0.093954	-1.38052	0.814708	0.184001	0.0786104	0.293555	-0.381056	0.612643	0.014979	0.58143	0.220255	0.791267	0.998329	-0.0155135	-0.420523	0.723114	1.56233	1.31834
-240.64	0.109778	1.55756	0.30566	0.825285	-0.106505	-1.42896	0.803086	0.201994	0.0597815	0.325469	-0.450928	0.617094	-0.00333778	0.569778	0.186004	0.782172	0.985826	-0.0176521	-0.407208	0.727257	1.60948	1.31874
-240.16	0.043027	1.58083	0.337503	0.827995	-0.129153	-1.48606	0.793861	0.212818	0.0341142	0.343506	-0.512754	0.630427	-0.0233733	0.565743	0.164106	0.780971	0.969344	-0.00831054	-0.39004	0.728193	1.63634	1.31113
-239.68	0.00395349	1.60499	0.38393	0.862954	-0.153077	-1.53587	0.784103	0.21415	0.00173936	0.336471	-0.563918	0.644196	-0.0370885	0.571825	0.154095	0.785021	0.954253	0.0145576	-0.373637	0.725772	1.64325	1.29747
-239.2	-0.00728565	1.63394	0.43517	0.912976	-0.174955	-1.57857	0.777361	0.207181	-0.0334179	0.307511	-0.601376	0.649019	-0.0402294	0.588022	0.15129	0.788977	0.943999	0.048147	-0.359685	0.718156	1.63583	1.28246
-238.72	-0.00425905	1.66771	0.479125	0.956	-0.190316	-1.61888	0.778643	0.196052	-0.0659728	0.273551	-0.619607	0.640201	-0.0349383	0.61194	0.148341	0.788502	0.937281	0.0837802	-0.349035	0.704583	1.62338	1.27351
-238.24	-0.00598508	1.69575	0.507324	0.984758	-0.205453	-1.67043	0.795147	0.184915	-0.0864053	0.256139	-0.616964	0.620524	-0.0297663	0.641173	0.139762	0.785519	0.930717	0.113937	-0.341587	0.684345	1.61372	1.27385
-237.76	-0.0205545	1.70856	0.52367	1.00066	-0.222108	-1.73487	0.828579	0.175711	-0.0910911	0.268956	-0.596424	0.597813	-0.0341568	0.669653	0.118815	0.778729	0.920446	0.134515	-0.334678	0.658371	1.61663	1.28085
-237.28	-0.0456507	1.69758	0.536209	1.01131	-0.240236	-1.79773	0.87413	0.169329	-0.0813343	0.308334	-0.570016	0.580856	-0.0513014	0.691044	0.0818328	0.763954	0.90476	0.144243	-0.327206	0.631985	1.6298	1.29111
-236.8	-0.0706306	1.67085	0.546369	1.02196	-0.255848	-1.83907	0.916943	0.166134	-0.0628643	0.355708	-0.545115	0.574942	-0.078755	0.699946	0.031084	0.735087	0.884614	0.144849	-0.316428	0.608837	1.65106	1.30237
-236.32	-0.0894591	1.64112	0.552519	1.02657	-0.262507	-1.83892	0.943475	0.167116	-0.0441607	0.392498	-0.532284	0.572582	-0.108628	0.693283	-0.0268402	0.688203	0.864207	0.138383	-0.303715	0.590214	1.66915	1.31495
-235.84	-0.11099	1.6227	0.544811	1.02284	-0.255629	-1.7903	0.944807	0.172572	-0.0307005	0.412207	-0.528358	0.561444	-0.137191	0.674929	-0.0832473	0.623831	0.849152	0.12836	-0.291362	0.576953	1.67794	1.33124
-235.36	-0.14606	1.61879	0.520811	1.0151	-0.239402	-1.7072	0.922174	0.181159	-0.0261374	0.420346	-0.525463	0.533265	-0.161173	0.655537	-0.129483	0.553591	0.842216	0.119359	-0.282009	0.567169	1.67537	1.35188
-234.88	-0.20224	1.62153	0.483713	1.01373	-0.223035	-1.60907	0.885133	0.187319	-0.0357089	0.432679	-0.517407	0.491368	-0.181281	0.646959	-0.163562	0.492586	0.841025	0.116128	-0.27769	0.561515	1.66435	1.37333
-234.4	-0.274724	1.61829	0.44317	1.02743	-0.216189	-1.52275	0.845407	0.183844	-0.0570563	0.460891	-0.50746	0.450296	-0.198584	0.657721	-0.186168	0.451639	0.838703	0.121779	-0.275003	0.55864	1.64754	1.39086
-233.92	-0.346316	1.60259	0.407571	1.05203	-0.224095	-1.46028	0.812843	0.167859	-0.086956	0.503252	-0.497606	0.424916	-0.212369	0.686305	-0.203647	0.43171	0.827879	0.135038	-0.268892	0.556483	1.6287	1.39969
-233.44	-0.405965	1.57492	0.379346	1.06975	-0.244981	-1.42189	0.791977	0.141157	-0.116076	0.548321	-0.480835	0.419096	-0.223633	0.722064	-0.217592	0.423549	0.804735	0.151009	-0.255764	0.551362	1.60837	1.40067
-232.96	-0.44362	1.54502	0.355089	1.05817	-0.269792	-1.39736	0.778867	0.110801	-0.141894	0.581471	-0.434949	0.429564	-0.230544	0.751849	-0.226844	0.413722	0.773097	0.165163	-0.234151	0.540707	1.58658	1.39801
-232.48	-0.463969	1.52333	0.331066	1.01009	-0.289457	-1.3698	0.773217	0.0853195	-0.161759	0.598612	-0.345318	0.442514	-0.234608	0.765721	-0.229412	0.391757	0.743098	0.175495	-0.208334	0.524208	1.56061	1.39792
-232	-0.469736	1.51477	0.308234	0.936714	-0.295976	-1.31664	0.772094	0.0698354	-0.180268	0.600553	-0.21906	0.450486	-0.236535	0.765459	-0.225233	0.359257	0.724251	0.184447	-0.185893	0.503404	1.53054	1.40385
-231.52	-0.459361	1.51686	0.294535	0.866286	-0.288549	-1.22055	0.773822	0.0644159	-0.200439	0.599106	-0.0989081	0.458348	-0.235029	0.760214	-0.218502	0.326613	0.722374	0.195391	-0.17208	0.483692	1.49447	1.4171
-231.04	-0.42654	1.51914	0.292271	0.825121	-0.271349	-1.07626	0.781468	0.0651269	-0.227893	0.60375	-0.0374895	0.476029	-0.228901	0.763118	-0.21473	0.305013	0.735632	0.210613	-0.166744	0.468407	1.44967	1.43435
-230.56	-0.361018	1.51358	0.298377	0.820113	-0.252199	-0.901738	0.794634	0.0677505	-0.260894	0.615666	-0.051843	0.505506	-0.219011	0.78212	-0.214847	0.296915	0.75727	0.228753	-0.165654	0.45888	1.39557	1.45285
-230.08	-0.269082	1.49944	0.308054	0.833324	-0.241058	-0.72572	0.813719	0.0705263	-0.299968	0.629489	-0.0972956	0.537866	-0.209219	0.814483	-0.214793	0.29523	0.780734	0.245639	-0.164777	0.45485	1.33435	1.46955
-229.6	-0.165311	1.47872	0.314313	0.842139	-0.242366	-0.589583	0.83801	0.0750653	-0.345918	0.637383	-0.0862469	0.555374	-0.20404	0.848493	-0.20821	0.285223	0.801476	0.257773	-0.159989	0.455039	1.27008	1.48416
-229.12	-0.0681746	1.45954	0.318957	0.826304	-0.256279	-0.51725	0.865183	0.0845103	-0.399385	0.640564	0.0503258	0.542196	-0.205523	0.872969	-0.190566	0.259553	0.814859	0.263797	-0.153898	0.457323	1.20951	1.49626
-228.64	0.00793707	1.44864	0.326855	0.786297	-0.279954	-0.506333	0.8962	0.099762	-0.457484	0.641002	0.293326	0.493217	-0.21031	0.882086	-0.161914	0.22119	0.816346	0.265214	-0.150962	0.459856	1.15532	1.50501
-228.16	0.054264	1.44705	0.346248	0.73895	-0.308806	-0.537335	0.929528	0.117226	-0.513502	0.646264	0.533735	0.417853	-0.212039	0.879933	-0.128028	0.187232	0.803839	0.263948	-0.155306	0.45906	1.10516	1.50783
-227.68	0.0703827	1.45231	0.375713	0.705839	-0.341603	-0.585444	0.961536	0.131405	-0.558464	0.658901	0.639568	0.335314	-0.205065	0.875564	-0.0985689	0.173666	0.780081	0.264202	-0.167019	0.450416	1.05557	1.50394
-227.2	0.0624306	1.45895	0.407053	0.697137	-0.378033	-0.642514	0.986631	0.136232	-0.587214	0.676599	0.542279	0.262126	-0.188176	0.872551	-0.0783477	0.183899	0.753328	0.269249	-0.18231	0.432966	1.00678	1.49476
-226.72	0.0424016	1.46209	0.431304	0.713887	-0.420159	-0.710118	0.998662	0.130437	-0.601532	0.694165	0.286487	0.207805	-0.165311	0.860712	-0.0712807	0.211936	0.736337	0.28067	-0.195757	0.411379	0.963083	1.48306
-226.24	0.0213501	1.45878	0.442378	0.747262	-0.46264	-0.794137	0.991419	0.116966	-0.608426	0.705314	0.0069783	0.172463	-0.140655	0.824639	-0.0748387	0.240294	0.739527	0.297525	-0.203684	0.39407	0.931403	1.47179
-225.76	0.00930738	1.4509	0.437971	0.78887	-0.498772	-0.890881	0.968272	0.102338	-0.61675	0.708484	-0.174636	0.149495	-0.116505	0.754971	-0.0856028	0.259959	0.762009	0.315516	-0.204361	0.387083	0.910987	1.4599
-225.28	0.00807302	1.44404	0.418059	0.835701	-0.520613	-0.985675	0.93754	0.092647	-0.627315	0.702824	-0.21636	0.128598	-0.0909803	0.659871	-0.0957206	0.27002	0.79366	0.327761	-0.198874	0.39044	0.897939	1.44622
-224.8	0.011682	1.43934	0.387512	0.892368	-0.524632	-1.05699	0.909343	0.089874	-0.642975	0.690872	-0.170397	0.0994175	-0.062576	0.563368	-0.0968834	0.278011	0.818233	0.328669	-0.188011	0.396228	0.882811	1.43007
-224.32	0.00808491	1.43823	0.349864	0.965837	-0.517058	-1.08901	0.893127	0.0913081	-0.665879	0.677976	-0.121895	0.0554755	-0.0304598	0.49087	-0.0837833	0.291495	0.826192	0.315519	-0.172919	0.396276	0.859907	1.41243
-223.84	-0.0115651	1.4399	0.311016	1.05782	-0.506856	-1.0828	0.889567	0.0918036	-0.698942	0.67028	-0.121333	0.00238305	0.00104024	0.45036	-0.0565343	0.312614	0.817879	0.291413	-0.155401	0.391202	0.829192	1.39849
-223.36	-0.0469079	1.4425	0.28044	1.15953	-0.499115	-1.05479	0.891292	0.0868801	-0.74337	0.673945	-0.152236	-0.0441428	0.0276313	0.4257	-0.0220733	0.33591	0.802573	0.261283	-0.138583	0.392096	0.800757	1.39311
-222.88	-0.0932488	1.44644	0.262373	1.26261	-0.49538	-1.02795	0.887817	0.0753712	-0.798853	0.690097	-0.166497	-0.062635	0.0464628	0.387202	0.01174	0.355742	0.792266	0.231364	-0.125259	0.414864	0.783234	1.39664
-222.4	-0.143457	1.4562	0.25923	1.35648	-0.488559	-1.02162	0.871786	0.0583356	-0.853675	0.709966	-0.132872	-0.0418241	0.057518	0.313217	0.0346012	0.37193	0.79299	0.203352	-0.119211	0.467224	0.780977	1.40532
-221.92	-0.197089	1.4722	0.264501	1.43514	-0.478943	-1.04792	0.843331	0.0378993	-0.898813	0.722505	-0.0725001	0.0107079	0.0621837	0.213731	0.0438614	0.389724	0.806291	0.17462	-0.122156	0.54009	0.786854	1.41135
-221.44	-0.248403	1.49079	0.271969	1.49751	-0.470609	-1.09949	0.808338	0.0161406	-0.925869	0.71405	-0.0253092	0.0739256	0.0617263	0.123442	0.0428239	0.414565	0.830458	0.143032	-0.132886	0.609342	0.793029	1.40953
-220.96	-0.290411	1.50324	0.276557	1.54874	-0.472959	-1.16309	0.775697	-0.00566554	-0.934443	0.683148	-0.016896	0.122832	0.0552872	0.0810142	0.0387165	0.446855	0.86604	0.106496	-0.150582	0.649664	0.79079	1.39765
-220.48	-0.313629	1.49851	0.280569	1.59559	-0.494948	-1.21947	0.754581	-0.0260178	-0.935151	0.639216	-0.0296771	0.141355	0.041807	0.100216	0.0402926	0.479387	0.912389	0.0687959	-0.17093	0.651771	0.782684	1.37854
-220	-0.318271	1.47012	0.287978	1.63487	-0.535366	-1.24878	0.748422	-0.0428786	-0.935396	0.597293	-0.0235937	0.129597	0.0216825	0.161341	0.0522731	0.503506	0.965691	0.035227	-0.191658	0.624982	0.774577	1.35991
-219.52	-0.315074	1.41782	0.300672	1.65983	-0.585047	-1.25503	0.756892	-0.0547639	-0.94158	0.565521	0.0331041	0.100808	-0.00035012	0.222151	0.0708055	0.514698	1.01779	0.012742	-0.208875	0.593831	0.771264	1.34766
-219.04	-0.318789	1.35226	0.317286	1.66103	-0.632988	-1.24612	0.774259	-0.0611108	-0.953012	0.543149	0.131185	0.0717637	-0.0196989	0.245102	0.088765	0.515342	1.05875	0.00252395	-0.219574	0.578467	0.774591	1.34353
-218.56	-0.342524	1.2844	0.334251	1.63629	-0.667438	-1.23407	0.795712	-0.0613818	-0.967928	0.521917	0.230293	0.0553532	-0.032084	0.218991	0.0985463	0.514442	1.08527	0.00109774	-0.22237	0.586554	0.78016	1.34656
-218.08	-0.387167	1.22871	0.34625	1.59011	-0.690468	-1.23121	0.817306	-0.0565328	-0.983427	0.496095	0.296394	0.0603824	-0.0356076	0.159928	0.0982587	0.521127	1.10011	0.00271448	-0.217975	0.610968	0.784363	1.35373
-217.6	-0.439582	1.18989	0.350214	1.53198	-0.706412	-1.23139	0.840402	-0.0474146	-0.999978	0.46659	0.318188	0.0837142	-0.0337264	0.094763	0.0902407	0.539952	1.112	0.00185077	-0.20993	0.636906	0.786186	1.36045
-217.12	-0.485072	1.167	0.34296	1.4776	-0.721495	-1.22057	0.869239	-0.0363368	-1.01736	0.441218	0.314055	0.12759	-0.0307432	0.0434655	0.0835337	0.56807	1.12635	-0.00426818	-0.205731	0.655321	0.785568	1.36258
-216.64	-0.518454	1.15553	0.321475	1.44066	-0.738083	-1.18443	0.906627	-0.0265561	-1.03093	0.423791	0.309145	0.182458	-0.0308725	0.0108169	0.0827874	0.596638	1.1421	-0.0108708	-0.211531	0.666103	0.782734	1.35675
-216.16	-0.53837	1.14689	0.284022	1.43169	-0.752306	-1.11908	0.953789	-0.0227137	-1.03945	0.412644	0.317257	0.241107	-0.0353788	-0.0115138	0.0870863	0.620255	1.15366	-0.0137946	-0.229657	0.673008	0.775053	1.34416
-215.68	-0.544579	1.13227	0.23416	1.45235	-0.762855	-1.03537	1.00983	-0.0268115	-1.03639	0.400554	0.329916	0.289873	-0.0430068	-0.0346613	0.0901548	0.635464	1.15578	-0.00958266	-0.255337	0.681892	0.757468	1.32977
-215.2	-0.540457	1.10635	0.182237	1.49339	-0.770625	-0.950955	1.07119	-0.0378377	-1.02191	0.383274	0.33311	0.321998	-0.0527741	-0.0632762	0.0822791	0.645989	1.1497	-0.00101255	-0.28379	0.693221	0.730701	1.31956
-214.72	-0.523362	1.06699	0.145096	1.54525	-0.779784	-0.88128	1.12514	-0.0505037	-0.995714	0.364686	0.319258	0.33526	-0.0618183	-0.0949997	0.0618309	0.658448	1.1384	0.00873394	-0.308858	0.706911	0.700525	1.31811
-214.24	-0.492126	1.0181	0.136785	1.59531	-0.792621	-0.837575	1.1615	-0.057687	-0.961984	0.358841	0.289074	0.334909	-0.0687272	-0.125144	0.0325936	0.675503	1.12731	0.0148663	-0.330421	0.721222	0.67511	1.32497
-213.76	-0.454721	0.9693	0.159779	1.63367	-0.808612	-0.817393	1.17276	-0.0557471	-0.923725	0.379883	0.249604	0.33032	-0.0739471	-0.15221	0.0015169	0.696353	1.11684	0.0163481	-0.351055	0.733691	0.659085	1.33543
-213.28	-0.420074	0.930149	0.21016	1.65741	-0.825005	-0.814442	1.16063	-0.0462217	-0.885029	0.430885	0.201395	0.326518	-0.077084	-0.173661	-0.0225046	0.713985	1.10711	0.0151857	-0.374459	0.743437	0.650201	1.3437
-212.8	-0.390659	0.902035	0.271451	1.67365	-0.838123	-0.823016	1.13404	-0.0325547	-0.851925	0.50026	0.146561	0.323789	-0.0766011	-0.187059	-0.0368847	0.7226	1.09679	0.0143134	-0.400897	0.747468	0.641628	1.34583
-212.32	-0.364436	0.880394	0.331476	1.68581	-0.846795	-0.838199	1.10988	-0.0189115	-0.831736	0.563917	0.0840557	0.318386	-0.0732923	-0.192131	-0.0433035	0.719547	1.08639	0.012603	-0.427117	0.74113	0.625778	1.34179
-211.84	-0.334267	0.857583	0.382987	1.69761	-0.851163	-0.861356	1.09938	-0.00461528	-0.829826	0.601051	0.0229031	0.308775	-0.0659679	-0.187126	-0.0456865	0.709058	1.07647	0.00711342	-0.447827	0.721583	0.600691	1.33292
-211.36	-0.299596	0.82786	0.422595	1.70596	-0.849017	-0.886626	1.10228	0.0119681	-0.851157	0.606767	-0.0251526	0.297009	-0.0559501	-0.17821	-0.0468678	0.701721	1.06331	-0.0043186	-0.461364	0.69066	0.573762	1.32255
-210.88	-0.269452	0.790892	0.44979	1.69798	-0.841106	-0.903358	1.11322	0.032179	-0.889753	0.592753	-0.0472302	0.287224	-0.045042	-0.17064	-0.0476952	0.705538	1.04168	-0.0211101	-0.470178	0.653318	0.554731	1.30836
-210.4	-0.258399	0.752499	0.462837	1.66377	-0.827772	-0.904696	1.12602	0.0556437	-0.934359	0.581272	-0.046814	0.277794	-0.033798	-0.166541	-0.0473999	0.722418	1.00674	-0.0407796	-0.476613	0.617386	0.552085	1.29052
-209.92	-0.270274	0.716924	0.465071	1.60665	-0.812205	-0.891715	1.13441	0.0778583	-0.967994	0.58908	-0.0369578	0.266018	-0.0217423	-0.161258	-0.0444988	0.7474	0.961283	-0.0581415	-0.483717	0.588204	0.566698	1.26782
-209.44	-0.299107	0.682902	0.461779	1.53824	-0.799183	-0.879502	1.14616	0.0958267	-0.979094	0.616745	-0.0290799	0.247933	-0.00684895	-0.144889	-0.0420467	0.769871	0.915072	-0.0737111	-0.49088	0.568682	0.591502	1.24304
-208.96	-0.324113	0.647094	0.45982	1.477	-0.796703	-0.897341	1.16832	0.10785	-0.967818	0.646092	-0.0339596	0.227036	0.012973	-0.111787	-0.0404171	0.785572	0.88105	-0.0904314	-0.49622	0.558574	0.616408	1.22066
-208.48	-0.329979	0.606394	0.466137	1.43458	-0.804455	-0.967147	1.20087	0.115013	-0.943794	0.653979	-0.0497196	0.214773	0.037817	-0.062221	-0.0392085	0.795297	0.8646	-0.112131	-0.499253	0.557124	0.633797	1.20571
-208	-0.314281	0.566265	0.481587	1.40717	-0.819079	-1.08582	1.23557	0.119319	-0.923322	0.627749	-0.0679896	0.223361	0.066231	-0.0055981	-0.0395417	0.808116	0.859714	-0.139586	-0.501876	0.560588	0.641956	1.2007
-207.52	-0.288059	0.536518	0.501121	1.38703	-0.830401	-1.22529	1.25931	0.12184	-0.915757	0.573576	-0.0829384	0.258963	0.0951282	0.0423956	-0.0388373	0.833402	0.852398	-0.16952	-0.508011	0.562464	0.638905	1.20392
-207.04	-0.267582	0.529169	0.517971	1.36243	-0.83581	-1.33885	1.26022	0.123078	-0.914273	0.513333	-0.093498	0.313585	0.121834	0.0721054	-0.0373112	0.870297	0.831094	-0.194191	-0.521095	0.557309	0.628304	1.21285
-206.56	-0.267929	0.541966	0.533143	1.32693	-0.83545	-1.40163	1.2396	0.12563	-0.899128	0.470101	-0.101351	0.368448	0.143053	0.0799525	-0.0337145	0.908147	0.79478	-0.209364	-0.540855	0.540873	0.615456	1.22532
-206.08	-0.289914	0.568283	0.547691	1.28353	-0.832757	-1.42129	1.20699	0.132983	-0.855516	0.452928	-0.115992	0.406734	0.15572	0.0725919	-0.0287938	0.93232	0.754	-0.215561	-0.565617	0.512554	0.6044	1.2401
-205.6	-0.327977	0.591653	0.568125	1.24518	-0.831258	-1.4291	1.17065	0.147021	-0.787434	0.455728	-0.136501	0.423791	0.159125	0.0572384	-0.0260616	0.933847	0.723907	-0.218398	-0.593604	0.475929	0.598518	1.25492
-205.12	-0.371248	0.599248	0.595963	1.21726	-0.828021	-1.45567	1.13566	0.166738	-0.7138	0.461857	-0.166765	0.42784	0.154342	0.0383872	-0.0292061	0.915357	0.713001	-0.224632	-0.625491	0.435374	0.59761	1.26636
-204.64	-0.418144	0.587314	0.626294	1.20236	-0.817404	-1.50658	1.10213	0.187273	-0.660941	0.457161	-0.208175	0.434027	0.144982	0.0163793	-0.0393855	0.888705	0.719806	-0.238074	-0.661737	0.396506	0.601168	1.27104
-204.16	-0.462418	0.564035	0.648933	1.19777	-0.797302	-1.55744	1.06919	0.203068	-0.638834	0.440428	-0.257122	0.447793	0.137208	-0.0104471	-0.0575353	0.86596	0.732856	-0.258045	-0.701609	0.361215	0.605593	1.26579
-203.68	-0.492677	0.539444	0.657792	1.20374	-0.773756	-1.57264	1.03567	0.211259	-0.63293	0.421041	-0.306865	0.46458	0.13625	-0.0394279	-0.0816876	0.852324	0.739744	-0.279888	-0.740701	0.332182	0.610026	1.25331
-203.2	-0.506917	0.521575	0.65552	1.21786	-0.75933	-1.53895	1.00008	0.213346	-0.617944	0.411293	-0.34733	0.474143	0.146641	-0.065264	-0.107996	0.84522	0.733918	-0.2988	-0.773361	0.312394	0.612465	1.23732
-202.72	-0.504824	0.5138	0.651445	1.23256	-0.765885	-1.46919	0.962064	0.212459	-0.570588	0.415541	-0.368453	0.467516	0.166061	-0.0805569	-0.135514	0.837297	0.715943	-0.310599	-0.79603	0.303729	0.614362	1.22324
-202.24	-0.493842	0.516565	0.659204	1.23796	-0.797635	-1.38899	0.921268	0.211583	-0.489261	0.429287	-0.372867	0.449515	0.1891	-0.0813382	-0.16328	0.825324	0.691964	-0.313454	-0.809322	0.304758	0.615197	1.21192
-201.76	-0.484549	0.528832	0.682362	1.21846	-0.847678	-1.31102	0.877222	0.209522	-0.393603	0.44403	-0.370928	0.428402	0.209093	-0.0697474	-0.192116	0.815889	0.668793	-0.308481	-0.816819	0.311024	0.614697	1.20036
-201.28	-0.488016	0.548058	0.718082	1.16984	-0.900789	-1.23288	0.831323	0.204899	-0.308731	0.454394	-0.378735	0.413454	0.224001	-0.0508958	-0.22251	0.815236	0.651422	-0.297866	-0.824582	0.314354	0.61117	1.18378
-200.8	-0.505106	0.57067	0.756004	1.09403	-0.947663	-1.1303	0.788866	0.199219	-0.253176	0.461041	-0.404922	0.404097	0.236216	-0.0301204	-0.254496	0.827169	0.642415	-0.286997	-0.835231	0.308101	0.603638	1.16067
-200.32	-0.532416	0.589052	0.786301	1.01283	-0.988314	-0.993853	0.750064	0.197001	-0.226573	0.469865	-0.44979	0.388252	0.252026	-0.0105595	-0.28468	0.846549	0.640836	-0.281064	-0.848874	0.292139	0.593821	1.13382
-199.84	-0.559904	0.599047	0.808466	0.948462	-1.02927	-0.831417	0.713343	0.205487	-0.221279	0.485892	-0.496823	0.354837	0.275626	0.0072252	-0.314294	0.866143	0.644414	-0.283923	-0.863901	0.270771	0.583138	1.10974
-199.36	-0.583497	0.599405	0.824199	0.92057	-1.07587	-0.666386	0.677905	0.225858	-0.230452	0.506575	-0.532221	0.303602	0.306423	0.0240765	-0.344967	0.87409	0.648183	-0.295742	-0.877244	0.251661	0.577534	1.09403
-198.88	-0.604325	0.591492	0.838749	0.925574	-1.12334	-0.519222	0.64282	0.252984	-0.253708	0.525868	-0.550755	0.242264	0.338569	0.0413387	-0.376954	0.868437	0.647241	-0.311516	-0.886055	0.238679	0.574588	1.08854
-198.4	-0.620942	0.581057	0.851941	0.949724	-1.16398	-0.389098	0.613707	0.277135	-0.29076	0.536469	-0.550424	0.185675	0.365549	0.0613647	-0.410843	0.85158	0.639117	-0.324099	-0.884573	0.231217	0.576765	1.08988
-197.92	-0.635781	0.569843	0.860845	0.974745	-1.19084	-0.261135	0.594073	0.289682	-0.337904	0.535583	-0.542733	0.144743	0.382937	0.0861211	-0.444271	0.829398	0.62355	-0.32808	-0.869659	0.223641	0.586496	1.09117
-197.44	-0.649531	0.558539	0.861262	0.985321	-1.20618	-0.125575	0.578102	0.290222	-0.386803	0.528163	-0.540497	0.121766	0.391202	0.115625	-0.473766	0.805734	0.604653	-0.323655	-0.839516	0.210779	0.60596	1.08882
-196.96	-0.659756	0.542063	0.854468	0.978278	-1.21956	0.0140514	0.555588	0.28384	-0.43209	0.5203	-0.552649	0.114193	0.39273	0.146967	-0.49497	0.781411	0.586033	-0.317253	-0.799797	0.191553	0.631673	1.08221
-196.48	-0.667551	0.517935	0.845545	0.958279	-1.24305	0.139944	0.521255	0.279141	-0.473569	0.520036	-0.574566	0.117549	0.389228	0.175016	-0.506391	0.753679	0.569983	-0.315734	-0.757944	0.168195	0.663055	1.07674
-196	-0.679199	0.486694	0.839773	0.928122	-1.27916	0.235819	0.477758	0.280653	-0.518384	0.528595	-0.602585	0.130109	0.381598	0.1901	-0.50581	0.720482	0.553093	-0.324081	-0.724057	0.143391	0.696653	1.07498
-195.52	-0.696816	0.452596	0.841787	0.889953	-1.31869	0.293214	0.442562	0.28603	-0.567991	0.542892	-0.627444	0.152057	0.370461	0.18549	-0.491021	0.684579	0.533666	-0.341122	-0.70226	0.121316	0.729641	1.08112
-195.04	-0.722363	0.420035	0.85292	0.849191	-1.35298	0.312	0.429373	0.290217	-0.622884	0.559938	-0.642708	0.180987	0.358527	0.159568	-0.464249	0.6527	0.509572	-0.361177	-0.690541	0.103871	0.760514	1.09379
-194.56	-0.752676	0.391511	0.869387	0.808921	-1.37472	0.298976	0.434007	0.28883	-0.672041	0.579232	-0.651939	0.211466	0.347635	0.118576	-0.429062	0.631723	0.481699	-0.379215	-0.681799	0.0927059	0.789714	1.10942
-194.08	-0.786565	0.36828	0.890754	0.776527	-1.38562	0.258812	0.432522	0.282758	-0.704147	0.605746	-0.662406	0.240218	0.341081	0.0730527	-0.396359	0.623148	0.45294	-0.392067	-0.669436	0.0898983	0.817403	1.12473
-193.6	-0.829987	0.348532	0.914156	0.761236	-1.39326	0.201724	0.405113	0.276099	-0.716066	0.63851	-0.688296	0.268314	0.336571	0.0354424	-0.375715	0.623407	0.426472	-0.397751	-0.65247	0.0975195	0.845458	1.13637
-193.12	-0.888452	0.332593	0.93694	0.758609	-1.40612	0.137244	0.352746	0.272571	-0.712344	0.673219	-0.734322	0.298792	0.329476	0.0169313	-0.377325	0.624931	0.403318	-0.397008	-0.635508	0.113814	0.871623	1.14461
-192.64	-0.955229	0.322242	0.95538	0.754369	-1.42565	0.0664797	0.305804	0.27348	-0.703787	0.697145	-0.791045	0.336388	0.31625	0.020185	-0.401087	0.622132	0.384696	-0.389297	-0.621562	0.135931	0.895871	1.15221
-192.16	-1.02086	0.315699	0.964875	0.733192	-1.44687	-0.0083048	0.303525	0.276596	-0.693894	0.70059	-0.841989	0.379768	0.298673	0.0424558	-0.442055	0.61491	0.371794	-0.375458	-0.611023	0.158791	0.914978	1.15867
-191.68	-1.06328	0.308196	0.960415	0.682803	-1.46867	-0.0916178	0.35675	0.279088	-0.681472	0.681302	-0.875545	0.420351	0.283301	0.0732785	-0.490425	0.608133	0.366935	-0.359664	-0.599655	0.178183	0.927771	1.16592
-191.2	-1.06456	0.294943	0.941916	0.605539	-1.49228	-0.184702	0.43387	0.278213	-0.662246	0.6487	-0.888664	0.448777	0.279792	0.100322	-0.534331	0.605794	0.369313	-0.349182	-0.582958	0.194528	0.931174	1.17264
-190.72	-1.0222	0.275076	0.914041	0.521639	-1.52086	-0.27737	0.477305	0.27385	-0.635019	0.618069	-0.886294	0.461533	0.293099	0.111096	-0.570255	0.607264	0.374916	-0.351274	-0.559434	0.209647	0.922438	1.17622
-190.24	-0.95482	0.250254	0.880156	0.44814	-1.55835	-0.345211	0.440498	0.264615	-0.607457	0.59798	-0.875032	0.46571	0.319289	0.102686	-0.59636	0.608185	0.374284	-0.366964	-0.53197	0.225494	0.903355	1.17537
-189.76	-0.891345	0.225523	0.844604	0.400338	-1.60328	-0.369439	0.324753	0.25029	-0.594467	0.5861	-0.855624	0.469022	0.349806	0.0810356	-0.615743	0.603519	0.35937	-0.390141	-0.505692	0.243128	0.876724	1.16906
-189.28	-0.851868	0.209421	0.809611	0.370544	-1.64948	-0.348868	0.175149	0.231077	-0.605086	0.574349	-0.828186	0.480644	0.37618	0.0553229	-0.636555	0.592262	0.327396	-0.411358	-0.484882	0.262998	0.84849	1.15735
-188.8	-0.83779	0.208298	0.77421	0.342977	-1.69002	-0.307223	0.052653	0.209582	-0.637067	0.558549	-0.789233	0.495012	0.394838	0.0359238	-0.660725	0.577125	0.285297	-0.423051	-0.471652	0.286497	0.821211	1.1438
-188.32	-0.834778	0.221333	0.739714	0.302888	-1.721	-0.276975	-0.00904325	0.189517	-0.681264	0.543792	-0.744033	0.503137	0.40907	0.0251602	-0.688767	0.56228	0.245367	-0.4247	-0.463788	0.316097	0.797707	1.13251
-187.84	-0.819271	0.243236	0.712095	0.24514	-1.73921	-0.282897	-0.0168557	0.174192	-0.716861	0.543212	-0.703411	0.496394	0.424006	0.0172264	-0.716149	0.549657	0.21942	-0.422489	-0.458621	0.339415	0.777238	1.12599
-187.36	-0.774654	0.263257	0.694098	0.179162	-1.74388	-0.324297	-0.00437745	0.164492	-0.729856	0.567449	-0.672764	0.474708	0.440447	0.00773115	-0.738651	0.5383	0.21026	-0.4221	-0.452219	0.380592	0.753635	1.12603
-186.88	-0.69862	0.274618	0.688394	0.120126	-1.73761	-0.380349	-0.00152107	0.158378	-0.717677	0.614429	-0.649339	0.448976	0.453237	-0.0040832	-0.753192	0.527841	0.213196	-0.426357	-0.439877	0.4222	0.724549	1.1318
-186.4	-0.603349	0.274048	0.691146	0.0717219	-1.72399	-0.432171	-0.0169361	0.152258	-0.68928	0.672831	-0.630167	0.434844	0.455723	-0.0120901	-0.759821	0.518693	0.219333	-0.431563	-0.419582	0.457919	0.689552	1.14017
-185.92	-0.50558	0.265768	0.697633	0.027676	-1.71012	-0.470806	-0.0390839	0.143123	-0.659651	0.72615	-0.613097	0.443143	0.445988	-0.00935115	-0.762736	0.514365	0.224651	-0.433962	-0.390513	0.485764	0.650117	1.14794
-185.44	-0.420358	0.256567	0.703211	-0.0333767	-1.70333	-0.496199	-0.052952	0.130783	-0.640967	0.76452	-0.601429	0.471085	0.428194	0.00369912	-0.768887	0.517837	0.232097	-0.433238	-0.357928	0.509379	0.610414	1.15374
-184.96	-0.362537	0.249884	0.705679	-0.126186	-1.70719	-0.522468	-0.058795	0.116967	-0.637925	0.785527	-0.602932	0.509105	0.412164	0.0184851	-0.784252	0.527847	0.247633	-0.431154	-0.32934	0.533925	0.573258	1.15673
-184.48	-0.328693	0.243961	0.703748	-0.252512	-1.71733	-0.551325	-0.0643061	0.105088	-0.640875	0.794852	-0.614985	0.545916	0.405189	0.021985	-0.813937	0.54011	0.274897	-0.432019	-0.310446	0.56252	0.540946	1.15856
-184	-0.312795	0.230799	0.70493	-0.390033	-1.72474	-0.581533	-0.0755296	0.0985276	-0.641684	0.798092	-0.620456	0.571903	0.408283	0.00642541	-0.854655	0.549347	0.310047	-0.437138	-0.301682	0.594375	0.516439	1.1598
-183.52	-0.295954	0.200837	0.712062	-0.507641	-1.71896	-0.611832	-0.0879992	0.0982302	-0.635232	0.802343	-0.597887	0.585828	0.416287	-0.028071	-0.899953	0.554248	0.345194	-0.443734	-0.296211	0.623863	0.502989	1.16037
-183.04	-0.260714	0.152676	0.730326	-0.575102	-1.70035	-0.644201	-0.0900048	0.103779	-0.62323	0.810453	-0.537584	0.592324	0.422429	-0.0751329	-0.938647	0.555898	0.373679	-0.446418	-0.286344	0.6474	0.498815	1.15894
-182.56	-0.20104	0.0952348	0.759469	-0.583024	-1.67501	-0.687927	-0.0747343	0.112399	-0.61298	0.824595	-0.450217	0.59709	0.421477	-0.126824	-0.962028	0.557966	0.396391	-0.442893	-0.268279	0.663887	0.500566	1.15307
-182.08	-0.123304	0.0450794	0.794525	-0.547799	-1.65272	-0.738308	-0.0467051	0.119892	-0.60989	0.844685	-0.363023	0.605166	0.415453	-0.17878	-0.966952	0.558565	0.418376	-0.436344	-0.246253	0.676622	0.50142	1.14408
-181.6	-0.0487831	0.0160887	0.826641	-0.497608	-1.63877	-0.78162	-0.0191976	0.12374	-0.612069	0.866049	-0.3009	0.618038	0.411121	-0.228409	-0.960141	0.552045	0.444963	-0.431742	-0.227486	0.690872	0.494851	1.13169
-181.12	0.00675513	0.015316	0.847508	-0.456102	-1.6279	-0.794419	-0.00408218	0.123009	-0.613408	0.883008	-0.272356	0.634829	0.415537	-0.269387	-0.953983	0.533359	0.475954	-0.433829	-0.220773	0.707603	0.478597	1.11992
-180.64	0.0399323	0.03569	0.851955	-0.43718	-1.61263	-0.757273	-0.000778715	0.120311	-0.603338	0.889121	-0.265207	0.655183	0.431877	-0.293597	-0.95996	0.50495	0.506613	-0.443222	-0.226308	0.723683	0.453121	1.11067
-180.16	0.0555291	0.0665088	0.840962	-0.438038	-1.58508	-0.669188	0.000768421	0.11879	-0.581134	0.88525	-0.260796	0.676692	0.456516	-0.292841	-0.980065	0.479274	0.531618	-0.45778	-0.238504	0.734239	0.42684	1.10403
-179.68	0.0707493	0.099729	0.816658	-0.450258	-1.54776	-0.553211	0.00730854	0.118896	-0.552236	0.877238	-0.243996	0.702167	0.482059	-0.265616	-1.004	0.471854	0.55009	-0.476806	-0.248873	0.737173	0.405934	1.09681
-179.2	0.0901636	0.12854	0.785464	-0.472164	-1.51025	-0.444465	0.0221884	0.118385	-0.523129	0.870863	-0.218487	0.730576	0.500801	-0.221223	-1.01626	0.490311	0.565554	-0.499292	-0.253187	0.73371	0.393914	1.08621
-178.72	0.110924	0.156412	0.749427	-0.505956	-1.47962	-0.362099	0.0364819	0.1124	-0.498821	0.867733	-0.195493	0.756511	0.509915	-0.17666	-1.00242	0.530131	0.583404	-0.525256	-0.25383	0.727527	0.391756	1.0706
-178.24	0.128646	0.186489	0.706861	-0.556503	-1.45681	-0.308317	0.0390447	0.0970506	-0.475548	0.867646	-0.183255	0.776179	0.512589	-0.148681	-0.960704	0.570847	0.602798	-0.555455	-0.258404	0.722097	0.396105	1.05186
-177.76	0.139407	0.219574	0.656768	-0.618511	-1.43668	-0.257301	0.024789	0.0727003	-0.444639	0.867266	-0.1795	0.781343	0.516171	-0.142596	-0.901378	0.593216	0.619335	-0.587607	-0.274352	0.716669	0.404324	1.03521
-177.28	0.144225	0.249783	0.600466	-0.679214	-1.41089	-0.182759	-0.000315656	0.0455418	-0.402391	0.869045	-0.168864	0.770575	0.527666	-0.152465	-0.845963	0.586974	0.625372	-0.618261	-0.302211	0.709785	0.41834	1.02547
-176.8	0.150996	0.271926	0.543877	-0.728588	-1.37494	-0.072014	-0.025857	0.0228974	-0.352649	0.877281	-0.13537	0.745685	0.550969	-0.161486	-0.809918	0.556638	0.617172	-0.646167	-0.337723	0.698158	0.437286	1.02437
-176.32	0.160367	0.280564	0.497805	-0.758722	-1.33205	0.0581817	-0.0478913	0.0112766	-0.306862	0.895156	-0.0814825	0.712642	0.582134	-0.156629	-0.798172	0.518708	0.597396	-0.671974	-0.372614	0.680766	0.464751	1.03196
-175.84	0.164731	0.273446	0.465937	-0.779751	-1.29104	0.173611	-0.0645648	0.0113864	-0.280041	0.914751	-0.0253162	0.678621	0.615427	-0.134564	-0.800511	0.487987	0.572596	-0.696795	-0.400626	0.660081	0.491549	1.04413
-175.36	0.155802	0.257252	0.447073	-0.801415	-1.258	0.241673	-0.0823868	0.0195139	-0.278135	0.924043	0.00927597	0.648983	0.644517	-0.102809	-0.802363	0.47245	0.549422	-0.720719	-0.417777	0.636365	0.515662	1.0565
-174.88	0.1236	0.236768	0.436863	-0.83378	-1.23444	0.245323	-0.109372	0.0301501	-0.293808	0.913585	0.00827257	0.625887	0.669031	-0.078537	-0.794428	0.468571	0.530517	-0.740944	-0.427058	0.612209	0.53394	1.06471
-174.4	0.0760487	0.215561	0.424675	-0.873591	-1.21921	0.200718	-0.146621	0.0390254	-0.313201	0.88481	-0.020443	0.610121	0.689127	-0.0744604	-0.778423	0.470094	0.517623	-0.753575	-0.433339	0.586033	0.548405	1.06798
-173.92	0.0278825	0.1883	0.407187	-0.908948	-1.20729	0.136075	-0.189674	0.0442664	-0.326415	0.852282	-0.0554543	0.601419	0.705742	-0.0959135	-0.764291	0.473544	0.510558	-0.757258	-0.44061	0.557254	0.565341	1.06602
-173.44	-0.00518709	0.149543	0.383303	-0.933863	-1.19656	0.077612	-0.231633	0.0457227	-0.327929	0.833868	-0.0732529	0.596528	0.715607	-0.138456	-0.761515	0.479147	0.509653	-0.754071	-0.450775	0.528011	0.589247	1.06027
-172.96	-0.0068386	0.0962621	0.361441	-0.945668	-1.18484	0.0319078	-0.266126	0.0438953	-0.321828	0.836073	-0.0657229	0.592825	0.716909	-0.19143	-0.771529	0.485327	0.514008	-0.750071	-0.464124	0.502925	0.622472	1.06206
-172.48	0.0210088	0.0373432	0.347599	-0.94759	-1.17177	0.000133124	-0.291101	0.0383641	-0.309194	0.853393	-0.0442303	0.584515	0.709785	-0.244132	-0.786314	0.493022	0.52059	-0.74855	-0.478735	0.488797	0.661337	1.05158
-172	0.0685156	-0.0130615	0.342866	-0.945069	-1.15422	-0.0258536	-0.308796	0.0298009	-0.288828	0.869811	-0.0316935	0.564174	0.701336	-0.291769	-0.795053	0.494051	0.523702	-0.750696	-0.493067	0.489832	0.699575	1.03703
-171.52	0.113657	-0.0386487	0.343811	-0.934723	-1.13341	-0.0497151	-0.323699	0.0192716	-0.253534	0.875705	-0.049259	0.527643	0.698198	-0.333628	-0.793444	0.483736	0.51737	-0.75292	-0.508664	0.504508	0.73354	1.01731
-171.04	0.137845	-0.0329088	0.341187	-0.907283	-1.1109	-0.0709333	-0.34165	0.00942443	-0.19932	0.86969	-0.0985859	0.482013	0.705731	-0.369211	-0.782895	0.457604	0.49886	-0.751601	-0.523055	0.526264	0.760569	0.994655
-170.56	0.127494	0.000167503	0.332602	-0.859877	-1.09372	-0.0881501	-0.365897	0.00360855	-0.127324	0.859547	-0.163805	0.441324	0.719318	-0.398812	-0.772021	0.420855	0.470061	-0.745068	-0.533282	0.544122	0.779899	0.971301
-170.08	0.0850802	0.041114	0.320617	-0.803166	-1.08703	-0.104355	-0.398417	0.00287615	-0.0466378	0.850713	-0.219877	0.41973	0.728089	-0.422167	-0.766005	0.382077	0.434958	-0.735726	-0.536297	0.552032	0.793088	0.951639
-169.6	0.0232324	0.0738893	0.315703	-0.751159	-1.09508	-0.121183	-0.438959	0.00757734	0.037656	0.84329	-0.251049	0.423058	0.72158	-0.438719	-0.766015	0.349615	0.400827	-0.725591	-0.528948	0.550759	0.798228	0.939897
-169.12	-0.0383699	0.089564	0.323714	-0.717954	-1.11467	-0.14093	-0.481543	0.0167328	0.124348	0.828671	-0.259766	0.441541	0.697158	-0.44689	-0.768372	0.329794	0.373566	-0.714829	-0.51328	0.544944	0.792814	0.935124
-168.64	-0.0880628	0.091673	0.342803	-0.693982	-1.14064	-0.158567	-0.512891	0.0296892	0.216888	0.804473	-0.259143	0.455022	0.661565	-0.447271	-0.770063	0.326213	0.357111	-0.702066	-0.495753	0.539942	0.777739	0.934458
-168.16	-0.12435	0.088225	0.364142	-0.659343	-1.16681	-0.163111	-0.523079	0.045511	0.32038	0.776231	-0.264109	0.445459	0.625004	-0.435591	-0.772471	0.337883	0.35323	-0.684717	-0.481734	0.540405	0.758309	0.933467
-167.68	-0.149289	0.0899282	0.377006	-0.597171	-1.19094	-0.149134	-0.509466	0.063453	0.425963	0.761829	-0.282556	0.408347	0.594684	-0.408263	-0.780654	0.361236	0.359958	-0.662828	-0.473438	0.540774	0.742169	0.928277
-167.2	-0.159876	0.101758	0.378574	-0.509291	-1.21277	-0.117986	-0.479141	0.0802185	0.519301	0.772266	-0.31254	0.352723	0.571873	-0.36472	-0.794601	0.391281	0.372341	-0.64019	-0.467325	0.53624	0.734775	0.917996
-166.72	-0.15493	0.125039	0.374218	-0.421393	-1.23345	-0.0730825	-0.444224	0.0919432	0.582476	0.809207	-0.351958	0.300662	0.554998	-0.311889	-0.808975	0.422398	0.384942	-0.622983	-0.459894	0.524301	0.73761	0.906656
-166.24	-0.123204	0.158099	0.375193	-0.363204	-1.25286	-0.0161202	-0.418617	0.0957965	0.605691	0.857002	-0.405202	0.269072	0.542684	-0.258724	-0.813516	0.448246	0.393234	-0.615552	-0.446685	0.507267	0.745615	0.894456
-165.76	-0.0691839	0.197411	0.38996	-0.34553	-1.27057	0.0536194	-0.40411	0.0924803	0.595993	0.894896	-0.475782	0.262361	0.538234	-0.215757	-0.799308	0.466275	0.396067	-0.619226	-0.427326	0.491125	0.753616	0.883652
-165.28	-0.0135344	0.239352	0.419859	-0.359032	-1.28587	0.134155	-0.401945	0.0860695	0.56896	0.909528	-0.566156	0.274274	0.543924	-0.183465	-0.76554	0.477682	0.395716	-0.631527	-0.406084	0.478898	0.758213	0.872937
-164.8	0.0195069	0.276704	0.459266	-0.370639	-1.29944	0.213712	-0.403205	0.0823498	0.541954	0.899251	-0.665727	0.288718	0.560036	-0.155173	-0.721818	0.485989	0.395643	-0.647143	-0.384974	0.472793	0.763772	0.861234
-164.32	0.0107574	0.305716	0.506984	-0.361198	-1.30992	0.279817	-0.403039	0.0845078	0.524773	0.876038	-0.755411	0.297679	0.582717	-0.120419	-0.681674	0.499356	0.400501	-0.663041	-0.364573	0.47007	0.774036	0.851252
-163.84	-0.0389352	0.323786	0.560664	-0.323145	-1.31789	0.314614	-0.404694	0.0908957	0.519578	0.850706	-0.82349	0.299583	0.604725	-0.0751025	-0.656797	0.520904	0.410188	-0.677579	-0.343489	0.46951	0.795142	0.846601
-163.36	-0.111674	0.330291	0.617673	-0.270629	-1.31975	0.319959	-0.41135	0.097701	0.518271	0.828995	-0.868615	0.299426	0.620329	-0.0241723	-0.647213	0.548418	0.423817	-0.691003	-0.320274	0.472844	0.822788	0.850513
-162.88	-0.188693	0.329723	0.67571	-0.216659	-1.31011	0.3128	-0.427001	0.100796	0.517618	0.807091	-0.902252	0.301089	0.629235	0.0216621	-0.647023	0.578252	0.437908	-0.705927	-0.295706	0.482768	0.849083	0.859968
-162.4	-0.261173	0.319412	0.726775	-0.166283	-1.28595	0.306815	-0.449595	0.0986346	0.51755	0.777808	-0.936799	0.304231	0.633645	0.050535	-0.646287	0.604346	0.448677	-0.723912	-0.274496	0.50068	0.868281	0.867518
-161.92	-0.338385	0.298161	0.765815	-0.112718	-1.2481	0.321798	-0.476615	0.0914815	0.524838	0.739174	-0.974063	0.30094	0.637327	0.0578771	-0.638718	0.624299	0.45291	-0.745459	-0.259727	0.524337	0.880085	0.864922
-161.44	-0.429891	0.263707	0.793932	-0.0494897	-1.20318	0.367665	-0.501539	0.0811336	0.544979	0.696142	-0.999574	0.28676	0.643817	0.0485444	-0.624903	0.634578	0.448849	-0.769697	-0.250929	0.547311	0.888434	0.849592
-160.96	-0.535332	0.216456	0.824379	0.0273649	-1.15988	0.438965	-0.526405	0.0690315	0.580072	0.658883	-1.00472	0.258658	0.652841	0.0305522	-0.611824	0.635837	0.440255	-0.794363	-0.243582	0.562933	0.900513	0.822236
-160.48	-0.638537	0.163595	0.869214	0.107102	-1.12505	0.529291	-0.553324	0.0560221	0.623404	0.635409	-0.989094	0.22159	0.664486	0.0106844	-0.605256	0.631729	0.432612	-0.817266	-0.233109	0.566638	0.916438	0.792207
-160	-0.722398	0.11472	0.929837	0.178112	-1.10125	0.630429	-0.581615	0.0441628	0.66161	0.627859	-0.968134	0.178605	0.676019	-0.00748775	-0.606345	0.624007	0.430987	-0.83566	-0.217653	0.558117	0.931448	0.767322
-159.52	-0.773155	0.0800683	0.994255	0.234637	-1.08513	0.73637	-0.60714	0.0364482	0.683685	0.630944	-0.965105	0.135782	0.685891	-0.0234008	-0.612859	0.616417	0.437919	-0.848764	-0.19861	0.543788	0.939312	0.752922
-159.04	-0.800553	0.062445	1.04527	0.267917	-1.07205	0.843158	-0.624205	0.0341341	0.686649	0.635734	-0.994017	0.0944492	0.691395	-0.0368825	-0.618264	0.611976	0.450537	-0.855172	-0.181126	0.528985	0.940054	0.747351
-158.56	-0.823385	0.0553497	1.07083	0.285456	-1.05722	0.946474	-0.628435	0.0380609	0.676803	0.634385	-1.05325	0.0557047	0.69222	-0.0443778	-0.621441	0.612472	0.464091	-0.855103	-0.168204	0.518309	0.937671	0.74308
-158.08	-0.861252	0.0492663	1.07012	0.288436	-1.04144	1.04026	-0.618239	0.0465392	0.661733	0.624329	-1.13121	0.0206057	0.690112	-0.043188	-0.622635	0.62159	0.475334	-0.849981	-0.16208	0.513004	0.940211	0.734144
-157.6	-0.916748	0.0345314	1.05525	0.283154	-1.0292	1.12418	-0.595941	0.057931	0.644106	0.609359	-1.20655	-0.00931734	0.689136	-0.0311238	-0.626171	0.638892	0.483897	-0.841397	-0.160513	0.512342	0.953473	0.716105
-157.12	-0.978356	0.00683434	1.03868	0.26964	-1.02686	1.19997	-0.564201	0.0700884	0.623883	0.595002	-1.26425	-0.0345392	0.693857	-0.0108064	-0.635691	0.663929	0.493153	-0.830967	-0.161315	0.512341	0.970804	0.691597
-156.64	-1.02264	-0.0322304	1.02834	0.263459	-1.03471	1.26833	-0.520155	0.0809794	0.595261	0.584738	-1.29233	-0.0540076	0.705844	0.0130789	-0.653572	0.697081	0.505466	-0.819963	-0.164589	0.511544	0.983168	0.666401
-156.16	-1.03374	-0.0763568	1.02558	0.266991	-1.05165	1.33828	-0.464798	0.08902	0.557568	0.578942	-1.28541	-0.0694753	0.722843	0.0368602	-0.67764	0.729892	0.518496	-0.80773	-0.172057	0.508211	0.982492	0.644975
-155.68	-1.00277	-0.120209	1.03253	0.28479	-1.07112	1.41302	-0.402084	0.0912584	0.515542	0.574689	-1.24125	-0.0791724	0.739401	0.0619354	-0.70247	0.757002	0.527456	-0.791694	-0.184875	0.50517	0.968079	0.631063
-155.2	-0.937133	-0.160558	1.04701	0.302272	-1.0869	1.49599	-0.342078	0.0875314	0.474249	0.567823	-1.16437	-0.0841071	0.752729	0.0882342	-0.72317	0.772617	0.527697	-0.769967	-0.202279	0.504782	0.949852	0.623931
-154.72	-0.851225	-0.190719	1.0696	0.301593	-1.09702	1.59066	-0.295875	0.0802953	0.437927	0.55685	-1.07271	-0.0868924	0.762402	0.115614	-0.735623	0.777667	0.516342	-0.741288	-0.220202	0.508222	0.939056	0.620323
-154.24	-0.761956	-0.208409	1.09358	0.267764	-1.10357	1.70221	-0.270404	0.0762709	0.406638	0.544287	-0.98469	-0.0899921	0.771795	0.139508	-0.741456	0.772754	0.49361	-0.706977	-0.235165	0.515884	0.943045	0.61899
-153.76	-0.67862	-0.202843	1.10907	0.201108	-1.11365	1.82926	-0.262105	0.0822509	0.382773	0.531248	-0.90749	-0.0983389	0.785034	0.15283	-0.741308	0.761571	0.460844	-0.67278	-0.243862	0.526505	0.958062	0.619688
-153.28	-0.605565	-0.173737	1.11036	0.116756	-1.13305	1.96813	-0.265976	0.101533	0.368033	0.517477	-0.837573	-0.109686	0.802226	0.150907	-0.738425	0.744875	0.418853	-0.643416	-0.246054	0.537671	0.972127	0.621821
-152.8	-0.535385	-0.119274	1.09897	0.0358939	-1.16274	2.10231	-0.274244	0.13041	0.373861	0.499553	-0.757182	-0.116355	0.819645	0.137541	-0.731894	0.72249	0.368295	-0.622935	-0.24425	0.548049	0.971048	0.625322
-152.32	-0.452912	-0.0492465	1.08992	-0.0301061	-1.19428	2.21191	-0.28264	0.160553	0.406285	0.476015	-0.65367	-0.110548	0.832714	0.123091	-0.721026	0.688891	0.315233	-0.60841	-0.241293	0.557799	0.953601	0.630248
-151.84	-0.352601	0.027498	1.10039	-0.0807941	-1.21853	2.26899	-0.28744	0.183454	0.459783	0.450087	-0.527499	-0.0884363	0.840119	0.121429	-0.704467	0.645351	0.269298	-0.593335	-0.236548	0.567938	0.927582	0.634635
-151.36	-0.238033	0.0996671	1.13998	-0.126602	-1.22619	2.25996	-0.282893	0.195058	0.519181	0.432674	-0.402204	-0.0536856	0.842664	0.135795	-0.681848	0.601387	0.241336	-0.570539	-0.227972	0.579177	0.907836	0.636927
-150.88	-0.125082	0.164061	1.20302	-0.174606	-1.21544	2.19362	-0.26021	0.198437	0.56542	0.433275	-0.305072	-0.0168629	0.844822	0.159868	-0.65448	0.564491	0.238121	-0.535587	-0.211417	0.591247	0.907725	0.636728
-150.4	-0.0237702	0.220141	1.27123	-0.218734	-1.18983	2.09718	-0.213091	0.199031	0.58559	0.451112	-0.254953	0.0138845	0.848796	0.181584	-0.624795	0.542312	0.258601	-0.492457	-0.185503	0.605293	0.925679	0.631829
-149.92	0.0651925	0.271526	1.32452	-0.244184	-1.15452	2.00659	-0.14603	0.202941	0.584193	0.47341	-0.255182	0.0356953	0.853455	0.191467	-0.59103	0.534346	0.294914	-0.450878	-0.152063	0.619476	0.95522	0.624554
-149.44	0.159106	0.324904	1.35419	-0.237674	-1.1138	1.93888	-0.0729133	0.213034	0.573191	0.483219	-0.287155	0.0525978	0.854569	0.188337	-0.555306	0.533572	0.339092	-0.419771	-0.115279	0.631305	0.985972	0.61794
-148.96	0.271952	0.379811	1.36372	-0.201867	-1.07144	1.88064	-0.0123573	0.229055	0.567279	0.470002	-0.326168	0.0672126	0.848621	0.179343	-0.51773	0.534095	0.386117	-0.403849	-0.0794229	0.638956	1.01128	0.616062
-148.48	0.404106	0.432113	1.36218	-0.150545	-1.03042	1.80078	0.021267	0.248064	0.566986	0.435795	-0.360504	0.0813879	0.835954	0.172912	-0.479211	0.536157	0.435241	-0.398864	-0.0492112	0.64046	1.03225	0.622483
-148	0.534464	0.476283	1.35572	-0.10161	-0.993827	1.67787	0.0281019	0.268058	0.566199	0.394166	-0.384054	0.0941187	0.823228	0.172646	-0.443764	0.544156	0.484519	-0.395595	-0.023625	0.636604	1.0535	0.637453
-147.52	0.639369	0.503626	1.34313	-0.0739008	-0.964878	1.52207	0.0194424	0.285854	0.556354	0.361789	-0.399895	0.106308	0.814762	0.177112	-0.411688	0.560808	0.528394	-0.384159	-0.000509057	0.629885	1.07997	0.657479
-147.04	0.709933	0.514763	1.31893	-0.0700901	-0.94295	1.37348	0.0120221	0.300557	0.538867	0.344857	-0.416535	0.120904	0.813668	0.181365	-0.384261	0.584571	0.559478	-0.362285	0.0240584	0.623356	1.10901	0.675559
-146.56	0.758138	0.512638	1.28217	-0.0846573	-0.926439	1.27876	0.0175106	0.311488	0.523843	0.338025	-0.43361	0.144936	0.815787	0.185662	-0.359628	0.605964	0.57188	-0.333414	0.0520555	0.619365	1.13467	0.687336
-146.08	0.811326	0.507745	1.2373	-0.107387	-0.907775	1.26203	0.0361596	0.320203	0.524554	0.333406	-0.451251	0.175894	0.814816	0.194992	-0.340584	0.617061	0.566505	-0.304253	0.0817156	0.61795	1.15403	0.691579
-145.6	0.889878	0.507895	1.19858	-0.129081	-0.882139	1.29645	0.060281	0.32771	0.547552	0.325784	-0.463423	0.205844	0.805065	0.214027	-0.331508	0.621604	0.554071	-0.279559	0.109055	0.61825	1.16972	0.691675
-145.12	0.992081	0.516065	1.17587	-0.140272	-0.84866	1.33249	0.0805078	0.335195	0.590561	0.318266	-0.469109	0.221526	0.787595	0.242348	-0.336364	0.629213	0.546262	-0.258706	0.130733	0.620159	1.19381	0.691168
-144.64	1.099	0.528587	1.17107	-0.131963	-0.813295	1.31649	0.0889847	0.341658	0.642227	0.317359	-0.469505	0.214508	0.767429	0.272591	-0.351289	0.65574	0.550837	-0.240224	0.145387	0.62395	1.23351	0.692135
-144.16	1.18807	0.543864	1.17616	-0.0995433	-0.784006	1.23029	0.0834434	0.345798	0.691211	0.322573	-0.466274	0.192357	0.748976	0.293579	-0.366146	0.703635	0.568093	-0.221462	0.155547	0.629693	1.29603	0.695031
-143.68	1.25301	0.562937	1.17966	-0.0441276	-0.76646	1.09055	0.065948	0.347975	0.733795	0.326846	-0.458428	0.171203	0.734369	0.296216	-0.368446	0.764053	0.590782	-0.202793	0.164848	0.635692	1.37619	0.700627
-143.2	1.3027	0.593001	1.1734	0.028833	-0.760567	0.932991	0.043316	0.349982	0.771584	0.321707	-0.443481	0.164798	0.721294	0.276786	-0.351461	0.820355	0.613636	-0.186909	0.178331	0.639476	1.46431	0.709388
-142.72	1.35174	0.645526	1.16322	0.105166	-0.761366	0.796707	0.0252266	0.355148	0.805885	0.304606	-0.417365	0.181343	0.704527	0.239578	-0.319736	0.861046	0.632279	-0.177339	0.197142	0.637821	1.54643	0.723278
-142.24	1.39822	0.802357	1.16161	0.165853	-0.757707	0.700876	0.019531	0.364404	0.836021	0.285185	-0.381673	0.210931	0.683421	0.187739	-0.284065	0.883362	0.645467	-0.174061	0.220328	0.627653	1.61092	0.740158
-141.76	1.42676	0.906387	1.17842	0.197804	-0.747416	0.648762	0.0283905	0.375821	0.857254	0.278015	-0.344566	0.241885	0.661249	0.145552	-0.256725	0.893238	0.652887	-0.174549	0.243109	0.610629	1.64952	0.755768
-141.28	1.41421	1.01455	1.21552	0.193465	-0.729277	0.634111	0.0466761	0.386043	0.867733	0.294713	-0.314601	0.266063	0.645159	0.116677	-0.236853	0.899516	0.652832	-0.175513	0.264274	0.589892	1.66151	0.76199
-140.8	1.3487	1.10341	1.26599	0.159789	-0.710796	0.640664	0.068384	0.391274	0.866265	0.335748	-0.296295	0.284771	0.64108	0.108355	-0.218248	0.905593	0.644181	-0.174754	0.280206	0.569316	1.65234	0.753444
-140.32	1.24472	1.15828	1.31629	0.115344	-0.696667	0.653228	0.0866234	0.391693	0.857976	0.388974	-0.28719	0.304577	0.652111	0.121462	-0.189531	0.914878	0.629665	-0.17376	0.290635	0.550563	1.63146	0.733625
-139.84	1.13011	1.18312	1.35864	0.0828995	-0.689735	0.661013	0.101393	0.390214	0.844057	0.435124	-0.281189	0.327953	0.675706	0.150555	-0.146541	0.929272	0.616759	-0.174849	0.296005	0.533972	1.61032	0.708905
-139.36	1.03706	1.18786	1.39222	0.075531	-0.688169	0.649214	0.114503	0.390792	0.823446	0.457341	-0.273891	0.349045	0.707016	0.18777	-0.0978546	0.955398	0.614141	-0.180062	0.297805	0.518745	1.59412	0.690312
-138.88	0.982967	1.1937	1.42058	0.0972979	-0.682236	0.614867	0.129059	0.395155	0.79309	0.451454	-0.263866	0.357521	0.74039	0.225853	-0.0567761	0.998718	0.626943	-0.187758	0.29759	0.505371	1.5809	0.683095
-138.4	0.964663	1.20931	1.44989	0.135459	-0.668585	0.565425	0.142349	0.401381	0.754651	0.42545	-0.253251	0.347488	0.769175	0.26125	-0.0331182	1.06133	0.651576	-0.194941	0.29739	0.494132	1.56678	0.685307
-137.92	0.96199	1.23616	1.48216	0.174218	-0.646321	0.507777	0.149187	0.40564	0.716269	0.395109	-0.245631	0.318072	0.789731	0.292113	-0.0271072	1.13346	0.678898	-0.198685	0.299273	0.486103	1.54976	0.688265
-137.44	0.952667	1.27332	1.51893	0.203422	-0.623308	0.452758	0.147418	0.40545	0.689667	0.376131	-0.235244	0.274357	0.799465	0.320409	-0.0320774	1.19579	0.697707	-0.198633	0.305675	0.480456	1.53461	0.68384
-136.96	0.92087	1.31596	1.56363	0.225865	-0.604396	0.411716	0.13897	0.401353	0.686629	0.376035	-0.214335	0.221995	0.799067	0.346124	-0.0387752	1.23678	0.702993	-0.195754	0.314964	0.475909	1.53015	0.669863
-136.48	0.86446	1.36315	1.61903	0.253517	-0.590206	0.395152	0.131275	0.39555	0.705481	0.395987	-0.177735	0.164045	0.790469	0.367962	-0.0419678	1.24915	0.697024	-0.190872	0.325819	0.470229	1.54473	0.647992
-136	0.796805	1.40935	1.68605	0.293363	-0.577041	0.411586	0.13015	0.38998	0.738872	0.429697	-0.129758	0.105639	0.774501	0.386606	-0.0392075	1.24215	0.687964	-0.186817	0.336148	0.465497	1.57729	0.624208
-135.52	0.729679	1.45038	1.76167	0.340937	-0.557941	0.4647	0.134174	0.384345	0.775088	0.468231	-0.0778266	0.052758	0.75197	0.402482	-0.031718	1.22811	0.68278	-0.184561	0.346533	0.462626	1.61804	0.602655
-135.04	0.677172	1.47707	1.83774	0.388111	-0.529646	0.544016	0.135829	0.376337	0.806284	0.502699	-0.0317577	0.0107196	0.721182	0.41483	-0.0195575	1.21861	0.684853	-0.185843	0.356394	0.463088	1.65262	0.582409
-134.56	0.639048	1.48752	1.90524	0.425246	-0.495124	0.632316	0.127228	0.363768	0.83016	0.526636	0.00364964	-0.0160407	0.680792	0.422446	-0.00417087	1.2172	0.693264	-0.192747	0.367822	0.465051	1.67044	0.561949
-134.08	0.607458	1.48774	1.96018	0.455927	-0.461412	0.707966	0.10527	0.346502	0.853805	0.535963	0.0266875	-0.0315469	0.634319	0.421996	0.0154465	1.21944	0.70648	-0.20564	0.381278	0.465245	1.67456	0.539012
-133.6	0.574549	1.48542	2.00275	0.489912	-0.434248	0.75905	0.0765104	0.327675	0.87834	0.531957	0.0378639	-0.0425009	0.589501	0.412675	0.0347489	1.21941	0.722797	-0.224559	0.396912	0.45802	1.67477	0.516391
-133.12	0.537173	1.48518	2.03971	0.539345	-0.413242	0.786087	0.0529182	0.312111	0.905231	0.521825	0.0294232	-0.0513909	0.555378	0.395572	0.0524175	1.21335	0.73982	-0.245302	0.413548	0.444076	1.68158	0.496283
-132.64	0.503381	1.48799	2.0768	0.603205	-0.39285	0.802399	0.0355422	0.302446	0.920563	0.51506	-0.00249095	-0.0519773	0.539118	0.377013	0.0673959	1.20029	0.754096	-0.263427	0.429903	0.426244	1.69879	0.483928
-132.16	0.485117	1.4871	2.1145	0.669978	-0.36679	0.826594	0.0223949	0.300588	0.919251	0.52355	-0.0588863	-0.0329637	0.542104	0.360233	0.0803597	1.18084	0.758967	-0.277629	0.443577	0.410341	1.7227	0.479755
-131.68	0.49124	1.48018	2.14619	0.72942	-0.332022	0.873743	0.0041908	0.305888	0.890105	0.548914	-0.128251	0.00805026	0.559256	0.34421	0.0948513	1.15659	0.749919	-0.28536	0.453249	0.4002	1.74448	0.481477
-131.2	0.515669	1.47358	2.16338	0.781445	-0.286258	0.954673	-0.0209381	0.317343	0.834698	0.585022	-0.198463	0.0613015	0.584986	0.321491	0.112446	1.13182	0.728038	-0.28799	0.458247	0.395861	1.75762	0.482762
-130.72	0.542188	1.47637	2.16437	0.831969	-0.230471	1.06552	-0.0464765	0.333864	0.755703	0.618335	-0.254219	0.103862	0.615212	0.285676	0.131939	1.11195	0.701192	-0.284923	0.460879	0.392462	1.75938	0.479689
-130.24	0.554285	1.50107	2.15385	0.887121	-0.165836	1.18183	-0.0618422	0.353646	0.659782	0.637338	-0.286417	0.118711	0.648681	0.236148	0.152148	1.10499	0.68004	-0.274187	0.463496	0.388081	1.75073	0.469874
-129.76	0.540976	1.55047	2.14383	0.942813	-0.0952167	1.27151	-0.0628907	0.374698	0.555579	0.636514	-0.294371	0.101975	0.683872	0.184368	0.173599	1.11406	0.670238	-0.253037	0.468631	0.383161	1.73425	0.453958
-129.28	0.521294	1.62046	2.14386	0.984814	-0.0210831	1.31189	-0.0552204	0.393777	0.457876	0.625148	-0.279026	0.0693478	0.720098	0.148229	0.195117	1.13401	0.669596	-0.219977	0.47577	0.381505	1.71109	0.433463
-128.8	0.522745	1.69849	2.15885	0.999664	0.0521972	1.30146	-0.0498681	0.410449	0.376205	0.618596	-0.245027	0.0415337	0.754674	0.143278	0.214925	1.15552	0.66937	-0.177622	0.483096	0.386046	1.68574	0.410832
-128.32	0.569082	1.77587	2.18155	0.985614	0.117114	1.27107	-0.0573633	0.424114	0.317406	0.630594	-0.196192	0.033693	0.787908	0.171172	0.230232	1.16739	0.662243	-0.132388	0.486229	0.3929	1.66003	0.388949
-127.84	0.665581	1.84065	2.19773	0.960545	0.167751	1.25574	-0.075941	0.437591	0.279031	0.664375	-0.136419	0.0398495	0.821838	0.219528	0.237562	1.16651	0.647368	-0.0920391	0.4854	0.395867	1.63803	0.369167
-127.36	0.793265	1.88569	2.19927	0.947056	0.200935	1.2851	-0.0963615	0.45237	0.250887	0.709558	-0.0737239	0.0457067	0.861568	0.267759	0.240619	1.16207	0.630287	-0.0599946	0.483947	0.390923	1.61832	0.35267
-126.88	0.917117	1.90651	2.18087	0.961091	0.217968	1.34357	-0.107354	0.468085	0.22079	0.752381	-0.0203288	0.043499	0.911042	0.298612	0.24225	1.15944	0.618888	-0.0377934	0.488402	0.381174	1.5937	0.339427
-126.4	1.00721	1.90348	2.14681	1.00073	0.223539	1.39772	-0.102039	0.483376	0.183739	0.784165	0.00696853	0.0352294	0.970529	0.306712	0.248045	1.16382	0.617574	-0.0222167	0.502488	0.374463	1.55879	0.328261
-125.92	1.04963	1.88383	2.10512	1.04998	0.224288	1.41357	-0.0805601	0.496682	0.143396	0.802694	-0.00292148	0.0365326	1.03544	0.297248	0.260557	1.17275	0.625146	-0.00701293	0.526711	0.381396	1.50879	0.317735
-125.44	1.052	1.85979	2.06668	1.08931	0.226439	1.38782	-0.0494983	0.507065	0.107609	0.81195	-0.047752	0.0603722	1.09674	0.280964	0.275157	1.1763	0.638982	0.0119154	0.555109	0.406343	1.44805	0.308749
-124.96	1.03334	1.8425	2.03794	1.11167	0.232115	1.35122	-0.0152844	0.514828	0.0810987	0.814854	-0.11278	0.105198	1.14825	0.264476	0.281394	1.16846	0.658053	0.0347944	0.580292	0.441145	1.38482	0.303128
-124.48	1.02036	1.8386	2.02353	1.11839	0.240168	1.34617	0.0176602	0.521219	0.0647487	0.811572	-0.172027	0.161756	1.18369	0.2467	0.273617	1.15249	0.684878	0.0595416	0.599611	0.473429	1.32509	0.302148
-124	1.0297	1.84274	2.02209	1.12161	0.24619	1.38864	0.0488231	0.525359	0.0531512	0.801731	-0.197309	0.216473	1.2026	0.224118	0.249426	1.13984	0.72188	0.0799988	0.617305	0.494273	1.2746	0.304924
-123.52	1.06866	1.84668	2.02913	1.13003	0.245408	1.46143	0.0813575	0.527671	0.0415299	0.786541	-0.173979	0.257875	1.2057	0.195036	0.21242	1.14393	0.767889	0.0914302	0.636991	0.502601	1.22722	0.309401
-123.04	1.12773	1.8397	2.03815	1.14795	0.239284	1.52326	0.115007	0.528499	0.0255177	0.771904	-0.108673	0.286845	1.1957	0.160284	0.171651	1.16978	0.815524	0.0923174	0.662388	0.505503	1.17945	0.312216
-122.56	1.18635	1.82005	2.04401	1.17228	0.236433	1.53535	0.151046	0.529153	0.00689644	0.765871	-0.0270156	0.304118	1.17604	0.127693	0.133705	1.21227	0.854461	0.0837789	0.691408	0.511715	1.12612	0.312298
-122.08	1.21896	1.79484	2.04419	1.20154	0.247714	1.4932	0.188411	0.532237	-0.0130529	0.768988	0.042801	0.309196	1.15312	0.103494	0.0993349	1.25678	0.875963	0.0715684	0.719925	0.523037	1.07313	0.309485
-121.6	1.21652	1.77672	2.03916	1.23428	0.278021	1.42344	0.221905	0.538933	-0.0360123	0.773578	0.0798251	0.301269	1.13287	0.0893139	0.0675537	1.28701	0.877921	0.0613336	0.744981	0.537291	1.0291	0.308613
-121.12	1.17745	1.77805	2.03238	1.2719	0.327082	1.36468	0.248078	0.550276	-0.0614802	0.768454	0.0880567	0.284448	1.1184	0.0836534	0.0349249	1.29558	0.863699	0.0559968	0.767767	0.548073	1.00426	0.314004
-120.64	1.11588	1.80492	2.02565	1.3175	0.387035	1.34503	0.26381	0.565076	-0.0838341	0.743804	0.0827206	0.265205	1.1089	0.084489	-0.000151648	1.28193	0.840056	0.0557601	0.790336	0.553186	1.00306	0.326898
-120.16	1.04697	1.85436	2.01779	1.37027	0.448248	1.37134	0.271677	0.582442	-0.0934221	0.699593	0.0801446	0.250538	1.10017	0.0890404	-0.0350926	1.25373	0.814031	0.0554468	0.810949	0.55499	1.02212	0.345709
-119.68	0.975008	1.9182	2.00314	1.42423	0.505897	1.42319	0.277449	0.602454	-0.083993	0.644574	0.0923022	0.248652	1.08983	0.100225	-0.0683168	1.22393	0.791733	0.0537756	0.826784	0.556553	1.05044	0.368286
-119.2	0.898629	1.98345	1.9761	1.47092	0.561083	1.49009	0.283085	0.624978	-0.0567214	0.588823	0.117513	0.257591	1.08082	0.117915	-0.0983227	1.20009	0.777579	0.0504354	0.831427	0.55995	1.0772	0.390999
-118.72	0.809749	2.03958	1.94162	1.50083	0.616692	1.56109	0.292241	0.648395	-0.0169962	0.53942	0.148937	0.271469	1.07701	0.139165	-0.124586	1.18417	0.775917	0.0485289	0.820663	0.56251	1.09296	0.410514
-118.24	0.709291	2.08141	1.90746	1.50842	0.675251	1.63552	0.300946	0.670314	0.0199401	0.498737	0.179186	0.280686	1.08056	0.158581	-0.147252	1.17196	0.787312	0.0545629	0.798479	0.559139	1.0984	0.428426
-117.76	0.611267	2.10717	1.88078	1.49456	0.73435	1.70531	0.309136	0.687807	0.0526624	0.470999	0.20653	0.280618	1.08663	0.170146	-0.164047	1.15386	0.808373	0.0722349	0.771893	0.550141	1.09921	0.444698
-117.28	0.536987	2.11691	1.86212	1.4714	0.789731	1.75267	0.317481	0.699787	0.0836464	0.465285	0.234821	0.27411	1.08734	0.174108	-0.172639	1.12051	0.831335	0.101589	0.748877	0.537047	1.10142	0.459451
-116.8	0.501729	2.11122	1.84635	1.44764	0.844331	1.75814	0.332307	0.706927	0.120042	0.492176	0.273406	0.272454	1.07598	0.173912	-0.172659	1.07092	0.847399	0.141269	0.731863	0.525844	1.11168	0.474914
-116.32	0.504424	2.09281	1.8219	1.42961	0.899329	1.71052	0.354939	0.712006	0.16566	0.554431	0.325157	0.289034	1.0529	0.176004	-0.167758	1.01693	0.851977	0.188958	0.71855	0.522421	1.13084	0.491365
-115.84	0.529485	2.06584	1.77956	1.41545	0.957545	1.61967	0.381833	0.717605	0.210429	0.640887	0.387764	0.332759	1.02674	0.186879	-0.163771	0.970817	0.846405	0.243772	0.703906	0.526003	1.15523	0.50757
-115.36	0.560134	2.03672	1.71909	1.3955	1.01776	1.50809	0.404012	0.724774	0.236293	0.727739	0.451679	0.397917	1.00941	0.205528	-0.169474	0.944223	0.838795	0.305923	0.687542	0.533245	1.18025	0.526922
-114.88	0.588211	2.01163	1.65337	1.36726	1.07164	1.40463	0.411918	0.733338	0.233393	0.792541	0.496926	0.47323	1.0065	0.22842	-0.188422	0.939204	0.837596	0.374694	0.672491	0.539771	1.20157	0.547813
-114.4	0.613571	1.99241	1.59488	1.33568	1.1105	1.32357	0.405077	0.740845	0.206005	0.826535	0.512681	0.542826	1.01669	0.25161	-0.214846	0.942114	0.848469	0.445048	0.662953	0.544929	1.21823	0.572328
-113.92	0.648029	1.97647	1.55422	1.31387	1.1303	1.27061	0.390145	0.745165	0.180003	0.837437	0.494154	0.596199	1.03131	0.270951	-0.237745	0.939546	0.869714	0.509861	0.661503	0.549544	1.23151	0.600013
-113.44	0.696647	1.95991	1.52937	1.31261	1.13382	1.23689	0.381189	0.743291	0.185861	0.846202	0.450964	0.634945	1.04009	0.285018	-0.243937	0.918114	0.894461	0.561494	0.66558	0.557757	1.24112	0.628861
-112.96	0.754446	1.94117	1.51231	1.3332	1.12923	1.21955	0.38753	0.734941	0.233591	0.86783	0.402563	0.671105	1.0394	0.292382	-0.230607	0.877768	0.916208	0.596061	0.66896	0.57118	1.24678	0.656642
-112.48	0.802097	1.92722	1.49039	1.36847	1.12444	1.2226	0.410522	0.720469	0.311265	0.90269	0.368978	0.713008	1.03077	0.287697	-0.201943	0.831123	0.929378	0.615258	0.666944	0.588311	1.2464	0.680819
-112	0.830041	1.92715	1.45377	1.40996	1.12324	1.25575	0.444472	0.702885	0.388944	0.938854	0.361776	0.763696	1.02092	0.268132	-0.168942	0.789305	0.934616	0.624011	0.659536	0.605436	1.23665	0.699255
-111.52	0.833933	1.94648	1.40134	1.45058	1.12392	1.31941	0.484196	0.686234	0.437799	1.01862	0.381999	0.813795	1.01732	0.235164	-0.141315	0.76436	0.934114	0.626686	0.651129	0.618242	1.22018	0.710392
-111.04	0.829761	1.98137	1.34405	1.4864	1.12454	1.40231	0.527943	0.675543	0.451651	1.01954	0.424638	0.852591	1.02345	0.197904	-0.118264	0.756256	0.931121	0.626791	0.646061	0.625792	1.19786	0.714825
-110.56	0.837094	2.02085	1.29205	1.51637	1.12181	1.48533	0.576688	0.674274	0.44792	1.01219	0.482395	0.874821	1.04046	0.169528	-0.0921735	0.759831	0.928537	0.624487	0.646657	0.630578	1.17351	0.714556
-110.08	0.867631	2.05032	1.25149	1.53609	1.11524	1.54248	0.628722	0.683031	0.456441	1.00776	0.551377	0.886857	1.06313	0.162271	-0.0553109	0.764923	0.92825	0.619772	0.649394	0.638079	1.15013	0.7108
-109.6	0.915327	2.06528	1.22393	1.53853	1.10352	1.56142	0.68014	0.700123	0.500874	1.01142	0.622789	0.89722	1.08583	0.178714	-0.00478292	0.76414	0.928465	0.614918	0.64937	0.646285	1.12696	0.706198
-109.12	0.971057	2.07742	1.20452	1.52211	1.08805	1.54001	0.720416	0.721991	0.580689	1.01832	0.690584	0.913964	1.10061	0.20817	0.0512834	0.752317	0.929774	0.612107	0.642329	0.666212	1.10309	0.702558
-108.64	1.02449	2.09917	1.18267	1.49496	1.07143	1.49161	0.741849	0.744751	0.676933	1.01929	0.743226	0.937934	1.10055	0.235478	0.100397	0.73193	0.931062	0.614283	0.629633	0.689799	1.07476	0.703454
-108.16	1.08087	2.14244	1.15058	1.46959	1.06075	1.42778	0.742228	0.76525	0.765144	1.01047	0.774147	0.967386	1.08433	0.247349	0.133327	0.705294	0.930198	0.622335	0.617489	0.713584	1.03996	0.710928
-107.68	1.15111	2.20431	1.10841	1.45623	1.05997	1.36206	0.727198	0.781156	0.827	0.997722	0.784555	1.00039	1.05561	0.243778	0.152083	0.678472	0.926462	0.635935	0.610129	0.735049	1.0025	0.725842
-107.2	1.23936	2.27067	1.05728	1.45318	1.07187	1.29875	0.706154	0.791692	0.859787	0.993137	0.782996	1.03685	1.02234	0.235513	0.166176	0.653216	0.91768	0.652437	0.607661	0.755291	0.96636	0.747585
-106.72	1.33656	2.32709	1.00018	1.45236	1.09308	1.23527	0.691118	0.798271	0.874803	1.00529	0.77134	1.08099	0.990926	0.238182	0.186677	0.636213	0.903326	0.670427	0.606453	0.77522	0.935692	0.773144
-106.24	1.42022	2.35708	0.944918	1.44486	1.11667	1.16173	0.687957	0.804596	0.885785	1.03394	0.747831	1.13116	0.966546	0.259526	0.219947	0.62518	0.881491	0.68744	0.602061	0.795712	0.909244	0.800483
-105.76	1.46549	2.35576	0.893003	1.43618	1.13707	1.07467	0.699008	0.81537	0.903427	1.07071	0.712681	1.17892	0.950132	0.292681	0.26278	0.616261	0.851805	0.702063	0.591705	0.81428	0.883198	0.827244
-105.28	1.46822	2.32291	0.848123	1.43392	1.15433	0.968584	0.722397	0.832742	0.925549	1.1025	0.67192	1.21243	0.93877	0.321931	0.308424	0.608952	0.8176	0.714755	0.577844	0.827896	0.85413	0.853262
-104.8	1.43511	2.26329	0.813636	1.44587	1.1738	0.85314	0.75234	0.857133	0.942165	1.12507	0.642384	1.22285	0.929363	0.328063	0.351872	0.604185	0.784	0.725998	0.565068	0.834659	0.822401	0.87782
-104.32	1.37932	2.18379	0.787953	1.47094	1.20045	0.730249	0.784048	0.884259	0.947309	1.13965	0.64369	1.20666	0.919974	0.307132	0.393576	0.604011	0.759916	0.740392	0.55618	0.838486	0.792596	0.899662
-103.84	1.3173	2.09623	0.771836	1.49464	1.23624	0.611606	0.811919	0.908871	0.937539	1.15404	0.687925	1.16867	0.90771	0.269184	0.44128	0.612243	0.748671	0.760265	0.552999	0.844821	0.768917	0.91625
-103.36	1.25774	2.01727	0.762038	1.50306	1.2779	0.50279	0.829918	0.927387	0.917671	1.17697	0.76489	1.12386	0.892688	0.234068	0.500309	0.629298	0.751609	0.786714	0.55427	0.857056	0.75648	0.924036
-102.88	1.20862	1.95953	0.752673	1.49511	1.31854	0.412984	0.840306	0.93901	0.895155	1.21308	0.851543	1.08634	0.874345	0.218888	0.56954	0.64978	0.761982	0.813123	0.558076	0.876023	0.752548	0.924431
-102.4	1.1837	1.92224	0.738504	1.48251	1.35381	0.350081	0.85134	0.946079	0.880802	1.25729	0.923443	1.06838	0.85572	0.23002	0.638285	0.665522	0.771076	0.831037	0.563815	0.899385	0.753546	0.920587
-101.92	1.19467	1.89566	0.713223	1.48309	1.38165	0.314746	0.87239	0.950458	0.871541	1.30186	0.965716	1.07255	0.839565	0.25879	0.693252	0.672204	0.773884	0.831976	0.568842	0.922413	0.756646	0.918092
-101.44	1.24194	1.86673	0.677546	1.50008	1.40666	0.300627	0.909154	0.953958	0.861027	1.33522	0.988056	1.09631	0.829769	0.29274	0.722708	0.668899	0.771456	0.813529	0.568973	0.940807	0.761368	0.921973
-100.96	1.30781	1.83238	0.636074	1.52846	1.43211	0.29518	0.958089	0.95713	0.840386	1.34892	1.01489	1.12932	0.827276	0.320467	0.730401	0.660011	0.768671	0.780089	0.559515	0.956395	0.772594	0.934495
-100.48	1.36086	1.80341	0.593984	1.55499	1.49119	0.290858	1.0079	0.9604	0.805435	1.34416	1.0683	1.15884	0.829732	0.341138	0.727143	0.651168	0.771413	0.740821	0.538632	0.970558	0.794672	0.952399
-100	1.38439	1.79857	0.55781	1.57619	1.53249	0.285897	1.04873	0.966482	0.762882	1.3281	1.15754	1.17404	0.832631	0.360923	0.731012	0.643788	0.77974	0.705208	0.511279	0.984884	0.83154	0.97078
-99.52	1.37381	1.82944	0.526451	1.60111	1.57583	0.296601	1.07302	0.978455	0.72203	1.3116	1.27318	1.1721	0.832982	0.387968	0.752415	0.64088	0.790232	0.678277	0.485805	0.999991	0.883889	0.984823
-99.04	1.34922	1.89092	0.496765	1.64026	1.61298	0.336118	1.08428	0.997692	0.691986	1.30131	1.39415	1.15651	0.831499	0.424647	0.793156	0.638223	0.798514	0.662379	0.470335	1.01432	0.948122	0.992368
-98.56	1.32935	1.96259	0.461076	1.69737	1.63795	0.4117	1.09032	1.02172	0.671528	1.30022	1.50173	1.13568	0.832801	0.467846	0.843599	0.639808	0.805367	0.65479	0.467448	1.02758	1.0171	0.995268
-98.08	1.31779	2.02673	0.416207	1.75903	1.65098	0.516404	1.09428	1.04419	0.656604	1.30672	1.58888	1.11459	0.840928	0.511763	0.890811	0.645503	0.81663	0.653889	0.471408	1.03855	1.08516	0.99935
-97.6	1.30841	2.07218	0.365946	1.80168	1.65612	0.625284	1.09859	1.0592	0.643306	1.31554	1.66163	1.09327	0.858099	0.552112	0.92463	0.655347	0.838304	0.659317	0.471929	1.04715	1.14616	1.00894
-97.12	1.29112	2.10737	0.321435	1.80844	1.66283	0.710607	1.09542	1.06349	0.629762	1.32547	1.72888	1.06624	0.882613	0.586443	0.938514	0.663558	0.871134	0.670135	0.461729	1.05365	1.20096	1.02852
-96.64	1.26318	2.14152	0.289842	1.78494	1.68243	0.749358	1.0834	1.0605	0.620886	1.33673	1.80463	1.02553	0.906551	0.612959	0.936497	0.660341	0.907464	0.684373	0.441588	1.0596	1.25354	1.05844
-96.16	1.23093	2.18401	0.272219	1.75308	1.7233	0.748899	1.06694	1.05681	0.615226	1.37504	1.89204	0.966433	0.924384	0.628274	0.922054	0.639439	0.934168	0.698459	0.419029	1.06563	1.30766	1.09485
-95.68	1.20303	2.2298	0.264179	1.73824	1.7846	0.734344	1.05959	1.05969	0.614614	1.39368	1.98499	0.893377	0.933101	0.626684	0.905092	0.603286	0.942512	0.707121	0.404995	1.07299	1.36371	1.13266
-95.2	1.18088	2.26888	0.255046	1.74741	1.85542	0.733998	1.07049	1.07302	0.620755	1.42056	2.0733	0.814867	0.935416	0.605216	0.892421	0.563305	0.932872	0.707301	0.403559	1.08297	1.41647	1.16686
-94.72	1.15304	2.29094	0.239118	1.77296	1.92276	0.77021	1.10287	1.09506	0.642621	1.4595	2.14304	0.74161	0.934245	0.567071	0.888815	0.53208	0.91653	0.69928	0.412827	1.0948	1.45815	1.19626
-94.24	1.11016	2.29664	0.216063	1.79409	1.97714	0.843508	1.1482	1.11992	0.690564	1.51495	2.18834	0.680137	0.932983	0.522123	0.89578	0.517215	0.906108	0.685408	0.424587	1.10768	1.48409	1.22142
-93.76	1.05524	2.29197	0.191747	1.79699	2.01701	0.942396	1.18836	1.14064	0.769258	1.58507	2.21421	0.629841	0.932448	0.48185	0.909476	0.518003	0.909709	0.668956	0.431264	1.11783	1.48907	1.24639
-93.28	0.9976	2.28559	0.166191	1.77976	2.04991	1.05008	1.20636	1.15418	0.872671	1.66104	2.23107	0.588633	0.931981	0.45106	0.923393	0.529569	0.923209	0.652165	0.428661	1.12284	1.47832	1.27347
-92.8	0.952895	2.28156	0.140386	1.75221	2.08223	1.15059	1.19453	1.15787	0.980136	1.73108	2.25176	0.550138	0.931715	0.424727	0.932307	0.54412	0.93659	0.635437	0.416672	1.12333	1.45676	1.30268
-92.32	0.923734	2.2799	0.110986	1.72857	2.11903	1.23131	1.16069	1.16284	1.07187	1.78668	2.2789	0.516781	0.931491	0.390286	0.936422	0.552896	0.939465	0.618848	0.40055	1.12212	1.42541	1.33128
-91.84	0.902412	2.28643	0.0784188	1.71503	2.15588	1.27999	1.11819	1.1677	1.13877	1.82564	2.3064	0.491418	0.931793	0.339877	0.939729	0.552033	0.927695	0.602541	0.384838	1.12183	1.38504	1.35689
-91.36	0.88067	2.30322	0.045826	1.71646	2.18294	1.29008	1.07977	1.17248	1.18675	1.85664	2.31643	0.479532	0.93192	0.275107	0.950981	0.541436	0.90539	0.587807	0.371385	1.12442	1.33552	1.37498
-90.88	0.860418	2.3306	0.0212156	1.7308	2.19551	1.27296	1.05371	1.17531	1.2265	1.89024	2.29616	0.482845	0.929422	0.208814	0.97726	0.521936	0.878973	0.578877	0.36047	1.129	1.28163	1.38527
-90.4	0.856287	2.36817	0.00577446	1.75894	2.19314	1.2585	1.03876	1.17562	1.26285	1.92961	2.23944	0.497442	0.924176	0.15484	1.01462	0.501049	0.853455	0.577873	0.351943	1.13508	1.22518	1.39121
-89.92	0.885763	2.40769	-0.00573042	1.80031	2.18325	1.28452	1.03292	1.17452	1.28768	1.97039	2.1603	0.51571	0.917729	0.118906	1.05531	0.489439	0.831188	0.583646	0.346215	1.14234	1.16966	1.39591
-89.44	0.945433	2.44189	-0.0211963	1.84728	2.17389	1.37212	1.03625	1.17565	1.29146	1.99982	2.07682	0.529968	0.916235	0.0971904	1.08868	0.499356	0.813412	0.592207	0.345337	1.15183	1.11483	1.40395
-88.96	1.01955	2.47056	-0.0477837	1.88734	2.16832	1.50312	1.0502	1.18025	1.26895	2.00805	2.00881	0.538384	0.923825	0.0805391	1.10998	0.535728	0.801208	0.594275	0.351758	1.16526	1.05823	1.41506
-88.48	1.08422	2.49731	-0.0783546	1.90796	2.16498	1.61958	1.07633	1.18723	1.22806	1.99269	1.9692	0.543018	0.942533	0.062449	1.12441	0.593519	0.793819	0.583588	0.366842	1.18272	1.00147	1.42752
-88	1.13053	2.5242	-0.107991	1.90927	2.15913	1.65809	1.11499	1.19269	1.17832	1.96235	1.96306	0.547281	0.968463	0.0439704	1.14263	0.656539	0.788292	0.558841	0.390794	1.20032	0.948493	1.43874
-87.52	1.17156	2.54962	-0.132009	1.89777	2.14859	1.58862	1.16021	1.19369	1.12497	1.93095	1.98497	0.554663	0.99469	0.028688	1.17322	0.707753	0.77846	0.526822	0.420455	1.21518	0.906165	1.44998
-87.04	1.22951	2.56664	-0.147342	1.88648	2.13749	1.42594	1.20319	1.18862	1.06235	1.90856	2.02503	0.565056	1.01711	0.0167618	1.21821	0.738313	0.757136	0.499371	0.451057	1.22308	0.878265	1.46409
-86.56	1.31774	2.56516	-0.163625	1.88063	2.13484	1.22453	1.23657	1.17895	0.979481	1.9015	2.07132	0.577826	1.03219	0.00398183	1.27034	0.74644	0.723894	0.486266	0.477706	1.2215	0.860384	1.4853
-86.08	1.42353	2.54669	-0.18503	1.88154	2.14784	1.04194	1.2546	1.16595	0.87575	1.91036	2.11174	0.592505	1.03911	-0.0142909	1.31653	0.739821	0.684742	0.489529	0.499915	1.21285	0.842199	1.5152
-85.6	1.51136	2.52119	-0.212991	1.87879	2.17856	0.900921	1.25683	1.15273	0.767206	1.92973	2.14137	0.60884	1.03769	-0.0363892	1.34325	0.72736	0.648135	0.50249	0.51941	1.20232	0.815043	1.55208
-85.12	1.5575	2.5031	-0.239876	1.8693	2.22184	0.788866	1.24791	1.14042	0.678859	1.95575	2.16683	0.624389	1.02612	-0.0526003	1.34717	0.716495	0.619872	0.514545	0.541711	1.19368	0.774736	1.59056
-84.64	1.56312	2.50383	-0.256462	1.85369	2.26501	0.670399	1.23563	1.13015	0.631842	1.98303	2.20032	0.635127	1.0026	-0.0521849	1.33506	0.708335	0.595978	0.516272	0.570633	1.1913	0.724966	1.62457
-84.16	1.5594	2.52265	-0.262085	1.84211	2.299	0.530582	1.22933	1.12276	0.625923	2.00916	2.25855	0.637418	0.969358	-0.030512	1.31782	0.706337	0.568636	0.50483	0.606504	1.19497	0.675644	1.65038
-83.68	1.57592	2.55037	-0.268395	1.8449	2.31856	0.377878	1.23292	1.11968	0.64547	2.03163	2.34267	0.630433	0.931007	0.00488261	1.30616	0.714793	0.530952	0.48593	0.646924	1.20023	0.635689	1.66578
-83.2	1.62515	2.57624	-0.286096	1.86434	2.32703	0.239282	1.24897	1.12011	0.671905	2.04879	2.44234	0.614521	0.894642	0.0406026	1.30685	0.740695	0.484985	0.468443	0.686253	1.20573	0.610744	1.6744
-82.72	1.68821	2.59401	-0.325014	1.89621	2.33045	0.13102	1.27133	1.12167	0.696301	2.05905	2.53793	0.59636	0.864473	0.0629698	1.31644	0.788407	0.440482	0.45916	0.720466	1.20465	0.60525	1.68184
-82.24	1.72769	2.60651	-0.383394	1.92772	2.33609	0.0476115	1.29199	1.12196	0.728132	2.06263	2.60995	0.579083	0.843741	0.0704542	1.33179	0.851787	0.407667	0.461358	0.748034	1.21194	0.61543	1.69054
-81.76	1.71985	2.61581	-0.443412	1.95057	2.3481	-0.030489	1.30143	1.12002	0.774566	2.05936	2.65769	0.565736	0.833197	0.0682179	1.34912	0.922181	0.389885	0.47227	0.770629	1.2264	0.639575	1.7026
-81.28	1.6748	2.62891	-0.484703	1.96087	2.36454	-0.124324	1.29466	1.11627	0.839844	2.04633	2.69272	0.558079	0.834417	0.0631481	1.36898	0.979816	0.381756	0.485978	0.790726	1.24972	0.66949	1.71833
-80.8	1.62907	2.6477	-0.496432	1.96326	2.38162	-0.235033	1.27236	1.11287	0.910169	2.01989	2.73304	0.560573	0.849383	0.0550488	1.39501	1.01081	0.37321	0.500023	0.810196	1.28117	0.69402	1.73635
-80.32	1.61716	2.67114	-0.478489	1.96197	2.39166	-0.343097	1.24103	1.11006	0.966746	1.97839	2.79033	0.579735	0.876009	0.0393664	1.42864	1.00664	0.357874	0.514219	0.828048	1.3148	0.703594	1.75668
-79.84	1.65052	2.69816	-0.445869	1.96418	2.39015	-0.426516	1.21237	1.10765	0.994851	1.92021	2.8605	0.618926	0.905542	0.012164	1.46622	0.970968	0.338748	0.529049	0.843016	1.34104	0.691351	1.7759
-79.36	1.71055	2.72593	-0.416539	1.96464	2.37631	-0.478051	1.19409	1.10491	0.992663	1.84884	2.92737	0.673303	0.923618	-0.0243004	1.50106	0.916766	0.324853	0.543968	0.852814	1.35492	0.66189	1.79015
-78.88	1.76096	2.75004	-0.400936	1.95813	2.35386	-0.510225	1.19399	1.10077	0.968368	1.77082	2.98349	0.73083	0.919578	-0.0618354	1.52862	0.855524	0.324941	0.555434	0.856599	1.35629	0.627397	1.79586
-78.4	1.77152	2.76884	-0.394432	1.94476	2.32955	-0.543358	1.21243	1.09453	0.945496	1.69258	3.02718	0.7768	0.890828	-0.090814	1.5477	0.796889	0.340573	0.558675	0.85441	1.34925	0.598499	1.78941
-77.92	1.7429	2.78408	-0.385679	1.9323	2.31087	-0.592265	1.24304	1.08722	0.941607	1.61907	3.07061	0.80283	0.84469	-0.105197	1.55978	0.747989	0.364001	0.551931	0.84793	1.33968	0.583233	1.77165
-77.44	1.68721	2.80216	-0.359952	1.93135	2.30136	-0.654139	1.27733	1.07939	0.965576	1.54941	3.13133	0.812433	0.795572	-0.105525	1.56648	0.708295	0.380884	0.537882	0.84138	1.33253	0.577712	1.7467
-76.96	1.62958	2.82872	-0.307964	1.94972	2.30321	-0.717989	1.30865	1.07238	1.01774	1.47907	3.22189	0.817497	0.752823	-0.10079	1.56628	0.676236	0.377509	0.52356	0.837991	1.33208	0.573057	1.71996
-76.48	1.58849	2.86498	-0.235337	1.98715	2.31132	-0.77534	1.33665	1.06831	1.09074	1.40645	3.34781	0.831306	0.720281	-0.0973227	1.55779	0.649923	0.347026	0.516212	0.839338	1.33941	0.561798	1.69725
-76	1.56774	2.90285	-0.155173	2.02915	2.31888	-0.828468	1.36231	1.06958	1.17029	1.33508	3.50162	0.856048	0.69371	-0.0951498	1.54161	0.626245	0.29289	0.518359	0.844066	1.35306	0.538584	1.68119
-75.52	1.55752	2.93242	-0.0844834	2.05591	2.32056	-0.881838	1.39026	1.07784	1.23694	1.27318	3.66171	0.884544	0.669409	-0.0884357	1.52247	0.600951	0.226282	0.528059	0.85095	1.37179	0.506637	1.67104
-75.04	1.54733	2.94111	-0.0364641	2.05013	2.31222	-0.931957	1.42425	1.09091	1.27953	1.23478	3.79707	0.905614	0.646814	-0.065996	1.50748	0.571253	0.16187	0.539779	0.856046	1.39137	0.472049	1.66319
-74.56	1.52852	2.92797	-0.0142331	2.01097	2.29622	-0.958075	1.46128	1.103	1.28728	1.22621	3.88455	0.913212	0.630698	-0.0192438	1.5007	0.5376	0.11004	0.548575	0.854158	1.40773	0.438562	1.65584
-74.08	1.50226	2.90135	-0.0128942	1.94651	2.27679	-0.930159	1.50051	1.10734	1.26004	1.24413	3.91038	0.910869	0.625398	0.0534959	1.49937	0.502379	0.0739029	0.550557	0.841496	1.4138	0.410029	1.64946
-73.6	1.48254	2.87806	-0.0242636	1.88108	2.26133	-0.835977	1.53803	1.1015	1.19877	1.27373	3.88414	0.907632	0.632105	0.144553	1.49744	0.470463	0.0492575	0.544976	0.815531	1.40585	0.384231	1.64434
-73.12	1.47866	2.86926	-0.0420674	1.83079	2.2538	-0.694416	1.57366	1.08817	1.11029	1.30023	3.82883	0.906843	0.648054	0.239997	1.49115	0.443386	0.0273978	0.531043	0.777187	1.38284	0.361697	1.63996
-72.64	1.49436	2.87741	-0.063051	1.80283	2.25392	-0.549841	1.60952	1.07343	1.0053	1.31136	3.76524	0.905889	0.668158	0.327544	1.48385	0.421943	0.00233544	0.50883	0.730444	1.34975	0.343111	1.63554
-72.16	1.5215	2.89034	-0.0856379	1.80024	2.25698	-0.447583	1.64449	1.06196	0.897962	1.30843	3.69957	0.896769	0.690141	0.398722	1.48367	0.404687	-0.0277029	0.479223	0.682591	1.31444	0.329159	1.62859
-71.68	1.5454	2.89953	-0.106327	1.80806	2.25711	-0.404628	1.67704	1.05369	0.807163	1.29987	3.62451	0.875985	0.71224	0.453088	1.49521	0.386867	-0.0579683	0.44284	0.641737	1.28423	0.318717	1.6185
-71.2	1.55493	2.89359	-0.125866	1.81701	2.25153	-0.407979	1.70304	1.04434	0.74891	1.29347	3.53656	0.846718	0.73195	0.491672	1.51411	0.363007	-0.0832614	0.400504	0.61241	1.26326	0.308634	1.60658
-70.72	1.55528	2.87389	-0.138192	1.81474	2.23736	-0.426217	1.72228	1.03141	0.725877	1.29536	3.43711	0.820447	0.747425	0.514775	1.52551	0.330706	-0.103219	0.353681	0.595871	1.25037	0.295052	1.59362
-70.24	1.56169	2.85197	-0.138359	1.8021	2.21515	-0.432907	1.73644	1.01742	0.722848	1.30519	3.34066	0.8058	0.756212	0.521826	1.51681	0.287516	-0.120162	0.303515	0.589569	1.24204	0.278226	1.57938
-69.76	1.59064	2.84282	-0.123236	1.78461	2.18494	-0.421238	1.74986	1.00938	0.719362	1.32107	3.26552	0.804799	0.757255	0.513078	1.48093	0.238526	-0.137953	0.251066	0.589381	1.23415	0.258162	1.56338
-69.28	1.64494	2.85688	-0.0920705	1.76834	2.14591	-0.393142	1.76729	1.01251	0.696688	1.29144	3.21869	0.812064	0.753622	0.495322	1.42362	0.185905	-0.157065	0.19801	0.591637	1.22821	0.240366	1.54468
-68.8	1.7124	2.89448	-0.0545214	1.75536	2.10088	-0.355106	1.78437	1.02509	0.649829	1.31796	3.18866	0.819063	0.749071	0.479283	1.35557	0.140596	-0.172763	0.147641	0.592236	1.2279	0.22482	1.52345
-68.32	1.77161	2.94767	-0.0236374	1.74457	2.05041	-0.29772	1.7957	1.03985	0.582628	1.34587	3.15908	0.822743	0.74727	0.471993	1.28906	0.109203	-0.177229	0.1016	0.588638	1.24008	0.210595	1.50231
-67.84	1.80904	3.00328	-0.0070271	1.7296	1.99889	-0.212926	1.79533	1.04624	0.505248	1.36971	3.12428	0.825074	0.746184	0.475432	1.22803	0.0919662	-0.165225	0.0604979	0.580256	1.26684	0.195073	1.48345
-67.36	1.82624	3.04793	-0.00781366	1.70728	1.94762	-0.103454	1.7813	1.03904	0.418287	1.37923	3.08997	0.82866	0.742906	0.482499	1.17101	0.0804234	-0.136505	0.0233384	0.566277	1.30253	0.179116	1.46786
-66.88	1.8363	3.0775	-0.0163551	1.68099	1.89741	0.00995964	1.75644	1.01966	0.325167	1.36931	3.06976	0.832045	0.733301	0.485562	1.1144	0.0612542	-0.0980128	-0.00997059	0.549547	1.33928	0.17081	1.45248
-66.4	1.85164	3.09235	-0.0249064	1.65007	1.846	0.0991052	1.72719	0.994727	0.231552	1.34049	3.06943	0.824321	0.719017	0.479253	1.05707	0.0278741	-0.0605575	-0.0371734	0.53502	1.36663	0.179429	1.43398
-65.92	1.87472	3.10126	-0.0261728	1.61836	1.79535	0.150947	1.69524	0.969021	0.151426	1.30324	3.07402	0.800321	0.703059	0.465355	1.00156	-0.0200517	-0.0342453	-0.0519041	0.527121	1.38063	0.208676	1.40759
-65.44	1.90176	3.11189	-0.0270678	1.58235	1.75048	0.172407	1.66026	0.944018	0.104806	1.27034	3.05863	0.760712	0.688295	0.450534	0.954208	-0.0694973	-0.0255466	-0.0497524	0.526882	1.38476	0.252272	1.37438
-64.96	1.92836	3.12823	-0.0354789	1.53854	1.72221	0.185589	1.61623	0.917432	0.0997501	1.24608	3.0007	0.720762	0.673685	0.43916	0.918876	-0.105717	-0.0352713	-0.0315942	0.530771	1.38542	0.297498	1.34152
-64.48	1.95163	3.14731	-0.0603382	1.49224	1.71652	0.207842	1.56262	0.887014	0.131396	1.22751	2.89795	0.695034	0.652429	0.433038	0.896576	-0.125477	-0.0594227	-0.0040016	0.531444	1.38887	0.329403	1.31792
-64	1.97675	3.16175	-0.0972273	1.45364	1.7292	0.247274	1.50105	0.853472	0.187139	1.20901	2.76416	0.69354	0.618151	0.434059	0.886977	-0.134913	-0.090051	0.0244687	0.523242	1.39553	0.340746	1.30753
-63.52	2.00373	3.16464	-0.134864	1.43289	1.74721	0.286011	1.44193	0.820129	0.252352	1.19178	2.61827	0.70905	0.568635	0.446242	0.885347	-0.148759	-0.116196	0.0478736	0.503128	1.39936	0.334832	1.31173
-63.04	2.03073	3.15396	-0.16012	1.43395	1.75253	0.319242	1.39096	0.790045	0.322425	1.18257	2.47304	0.723718	0.509018	0.475333	0.887509	-0.176864	-0.129146	0.0661064	0.472149	1.39498	0.320154	1.32136
-62.56	2.04965	3.13424	-0.166423	1.44241	1.7337	0.34796	1.35087	0.763796	0.400776	1.19277	2.328	0.723457	0.450057	0.520953	0.890954	-0.212364	-0.125973	0.0832794	0.434838	1.38222	0.300726	1.32972
-62.08	2.05882	3.11282	-0.156583	1.43662	1.69067	0.385478	1.32004	0.73926	0.487872	1.22341	2.17792	0.706438	0.399516	0.575549	0.895878	-0.242973	-0.109039	0.10272	0.396284	1.36588	0.277901	1.33208
-61.6	2.06433	3.09851	-0.140835	1.40014	1.63179	0.438039	1.2935	0.713647	0.573755	1.2609	2.03065	0.683044	0.358804	0.620891	0.904066	-0.255748	-0.0866433	0.124174	0.358287	1.35346	0.248857	1.32911
-61.12	2.07835	3.09258	-0.126209	1.33776	1.56769	0.491893	1.26457	0.685341	0.642405	1.28614	1.90151	0.669398	0.322396	0.641745	0.914587	-0.251657	-0.0686177	0.145257	0.320607	1.34888	0.211067	1.32305
-60.64	2.10394	3.09255	-0.112375	1.26984	1.50451	0.524718	1.23387	0.654708	0.689146	1.28272	1.80533	0.669156	0.285673	0.632502	0.923227	-0.241348	-0.0603482	0.16224	0.28388	1.35154	0.167108	1.31635
-60.16	2.13652	3.09264	-0.0943666	1.22564	1.44278	0.522971	1.20646	0.622603	0.719917	1.2548	1.74823	0.676044	0.248814	0.604057	0.92451	-0.241223	-0.0615194	0.174852	0.249132	1.35469	0.124617	1.30848
-59.68	2.16348	3.084	-0.0703004	1.21782	1.38355	0.486905	1.18962	0.588625	0.752347	1.21736	1.72088	0.67793	0.218479	0.576543	0.91414	-0.257754	-0.066959	0.184517	0.217505	1.35129	0.0860632	1.29691
-59.2	2.17342	3.06418	-0.0357402	1.23789	1.33021	0.438938	1.18982	0.552997	0.798482	1.18743	1.70802	0.668059	0.202609	0.567637	0.892543	-0.282959	-0.0709345	0.192785	0.189513	1.33771	0.0537947	1.28029
-58.72	2.17338	3.02985	0.00105846	1.26788	1.29367	0.406325	1.20992	0.517232	0.848334	1.16715	1.69518	0.646548	0.202809	0.582837	0.865552	-0.305697	-0.0708444	0.199525	0.165781	1.31404	0.0216964	1.25967
-58.24	2.18581	2.9837	0.0340513	1.29819	1.28289	0.403298	1.24009	0.483502	0.880026	1.14356	1.67265	0.621921	0.211515	0.613219	0.838695	-0.314349	-0.0684256	0.20115	0.143602	1.28437	-0.008643	1.23892
-57.76	2.23115	2.92687	0.0557842	1.33525	1.29776	0.431341	1.26735	0.456314	0.877432	1.09986	1.63856	0.600947	0.215211	0.644801	0.813964	-0.307583	-0.0673999	0.19549	0.122067	1.25274	-0.0385036	1.22259
-57.28	2.32141	2.86182	0.0670791	1.39231	1.32859	0.475428	1.2772	0.43876	0.842194	1.03331	1.58811	0.58622	0.203869	0.666824	0.788766	-0.29247	-0.0685451	0.183212	0.0993299	1.22102	-0.0644597	1.20865
-56.8	2.44107	2.79206	0.0721804	1.47392	1.35984	0.528497	1.2639	0.430942	0.796199	0.959147	1.5136	0.570855	0.178056	0.677003	0.76022	-0.278995	-0.0688368	0.166506	0.0768783	1.18977	-0.0837782	1.1961
-56.32	2.5628	2.72248	0.0844811	1.56803	1.37722	0.591582	1.23004	0.42902	0.768261	0.900817	1.42038	0.548633	0.147788	0.677971	0.730567	-0.269293	-0.0637864	0.149024	0.0549584	1.15682	-0.100133	1.17948
-55.84	2.65671	2.65958	0.106361	1.64919	1.376	0.670659	1.19144	0.42869	0.769075	0.870975	1.31538	0.51612	0.127004	0.673101	0.704017	-0.260089	-0.0513791	0.133305	0.0303104	1.12302	-0.115257	1.15902
-55.36	2.70809	2.60471	0.141082	1.70337	1.35947	0.758976	1.16361	0.426097	0.787006	0.860093	1.22122	0.475539	0.123683	0.660016	0.690489	-0.24932	-0.0325283	0.118825	0.000323202	1.08812	-0.130779	1.13917
-54.88	2.72205	2.55773	0.17852	1.72679	1.33262	0.842089	1.1536	0.421053	0.801297	0.846052	1.15714	0.43175	0.134997	0.640011	0.693538	-0.239985	-0.0134622	0.105976	-0.0381246	1.05458	-0.142876	1.12568
-54.4	2.71642	2.51407	0.205077	1.73629	1.3006	0.895022	1.15907	0.41514	0.797631	0.813659	1.13562	0.394226	0.150746	0.612871	0.705644	-0.237127	0.000373137	0.0962081	-0.081812	1.02453	-0.148659	1.11893
-53.92	2.70691	2.47017	0.209805	1.75055	1.25955	0.895114	1.16984	0.409174	0.784588	0.767388	1.14897	0.365321	0.158661	0.581705	0.714048	-0.244374	0.00707753	0.0902693	-0.125931	0.997707	-0.147176	1.11481
-53.44	2.70234	2.42824	0.191175	1.77234	1.20673	0.845366	1.17344	0.401869	0.78066	0.728312	1.17856	0.341529	0.151485	0.551052	0.704614	-0.260852	0.00748823	0.0881158	-0.163307	0.973214	-0.143307	1.10226
-52.96	2.6922	2.39075	0.157794	1.79052	1.14184	0.761908	1.16311	0.390537	0.803107	0.716762	1.2003	0.311744	0.129691	0.520104	0.672843	-0.277952	0.0051417	0.0888082	-0.190186	0.951991	-0.142727	1.07427
-52.48	2.66749	2.36504	0.124814	1.78681	1.07157	0.670132	1.14619	0.373849	0.849807	0.738227	1.19696	0.269102	0.0979546	0.486105	0.62681	-0.287543	0.00117747	0.0887365	-0.206673	0.93425	-0.146368	1.02991
-52	2.61218	2.34939	0.106437	1.75755	1.0068	0.586537	1.12945	0.352056	0.901334	0.777968	1.16932	0.213381	0.0622235	0.447478	0.579182	-0.284575	-0.00574815	0.0873468	-0.217021	0.922308	-0.152032	0.97831
-51.52	2.52581	2.33779	0.106485	1.7075	0.955415	0.511445	1.12211	0.328098	0.931578	0.814921	1.12702	0.153106	0.0271389	0.406351	0.542794	-0.27297	-0.0202754	0.083593	-0.22739	0.918308	-0.1518	0.930304
-51.04	2.41664	2.32087	0.114611	1.65146	0.91892	0.443349	1.12476	0.302686	0.928096	0.837678	1.08365	0.107027	-0.00491803	0.368296	0.519773	-0.258267	-0.0434521	0.0781478	-0.242374	0.920154	-0.141174	0.896119
-50.56	2.29754	2.29315	0.118009	1.59601	0.893707	0.382385	1.12971	0.274376	0.890844	0.850486	1.04763	0.0869772	-0.0324213	0.337393	0.505274	-0.249359	-0.0716802	0.0700795	-0.262911	0.924888	-0.122819	0.87806
-50.08	2.18375	2.25335	0.108198	1.5438	0.871978	0.33177	1.12787	0.241726	0.830853	0.864685	1.01339	0.0911228	-0.0535437	0.312794	0.48759	-0.24741	-0.0978368	0.0582655	-0.288932	0.928114	-0.10254	0.870474
-49.6	2.08505	2.20577	0.0873624	1.49534	0.850242	0.303288	1.11438	0.205483	0.760204	0.886419	0.974734	0.109327	-0.0661997	0.287138	0.456423	-0.252332	-0.113699	0.040987	-0.319582	0.927639	-0.0878548	0.86538
-49.12	2.00279	2.15617	0.0702106	1.4464	0.828667	0.284797	1.09238	0.172372	0.687351	0.908669	0.924983	0.12596	-0.0703978	0.252223	0.41167	-0.257179	-0.118543	0.0200987	-0.351345	0.924301	-0.0816566	0.857111
-48.64	1.93017	2.10882	0.0720708	1.39887	0.812225	0.266681	1.07384	0.152103	0.620136	0.912603	0.873605	0.135144	-0.0676721	0.206038	0.359538	-0.255072	-0.117758	0.00112333	-0.381367	0.92089	-0.0852441	0.845906
-48.16	1.85518	2.06728	0.101203	1.34941	0.802122	0.241121	1.06579	0.148958	0.571054	0.886929	0.840513	0.142517	-0.0643909	0.154573	0.310576	-0.242323	-0.119163	-0.0126267	-0.406378	0.919824	-0.0977407	0.835638
-47.68	1.76879	2.033	0.151747	1.297	0.798976	0.213168	1.06832	0.160481	0.542372	0.835024	0.838394	0.161548	-0.0687087	0.103258	0.266902	-0.218953	-0.127909	-0.0202721	-0.42335	0.918528	-0.117015	0.829858
-47.2	1.67219	2.01002	0.208562	1.23447	0.797642	0.203119	1.07785	0.175564	0.537859	0.774665	0.872122	0.199856	-0.0858439	0.0553828	0.226254	-0.18748	-0.142196	-0.0268715	-0.431735	0.91267	-0.142085	0.828001
-46.72	1.58183	2.00025	0.254524	1.15304	0.796094	0.230572	1.08774	0.181861	0.549916	0.726688	0.927736	0.252303	-0.118204	0.00824878	0.178824	-0.150262	-0.153762	-0.0395049	-0.434833	0.898909	-0.168842	0.824504
-46.24	1.51855	2.00098	0.277896	1.06032	0.788383	0.295749	1.09519	0.170955	0.567356	0.703447	0.991803	0.305418	-0.162848	-0.0455411	0.118537	-0.111983	-0.155766	-0.0618662	-0.435425	0.878244	-0.194617	0.814249
-45.76	1.50076	2.00499	0.28046	0.966758	0.772491	0.379652	1.10337	0.143388	0.580425	0.702776	1.05493	0.342671	-0.212967	-0.108814	0.0489589	-0.0730218	-0.147319	-0.0918405	-0.43711	0.855734	-0.212409	0.796337
-45.28	1.52616	2.00301	0.267116	0.88248	0.744289	0.450541	1.1176	0.106672	0.588111	0.711453	1.11839	0.359676	-0.260381	-0.178068	-0.0162604	-0.036124	-0.135521	-0.12186	-0.438724	0.837143	-0.222029	0.774831
-44.8	1.57879	1.9897	0.246538	0.810454	0.703978	0.486171	1.14022	0.0701519	0.594522	0.692091	1.18653	0.363663	-0.299238	-0.245991	-0.0649279	-0.00180703	-0.130984	-0.144824	-0.437204	0.823009	-0.225975	0.756842
-44.32	1.63035	1.96946	0.223458	0.746188	0.653919	0.495006	1.16628	0.040053	0.602435	0.68866	1.2595	0.364603	-0.326764	-0.306677	-0.0926292	0.0272022	-0.140319	-0.158828	-0.429626	0.808789	-0.226651	0.74873
-43.84	1.65846	1.94744	0.202214	0.682656	0.603477	0.502321	1.18915	0.0183427	0.612151	0.684054	1.33328	0.369998	-0.342369	-0.360305	-0.107774	0.0516257	-0.162082	-0.166667	-0.416697	0.788862	-0.226481	0.750323
-43.36	1.6556	1.93034	0.181259	0.619102	0.561657	0.534182	1.20048	0.0044308	0.617562	0.685717	1.40802	0.378957	-0.348563	-0.409045	-0.121044	0.0757559	-0.187503	-0.173102	-0.400665	0.761395	-0.228016	0.75443
-42.88	1.63057	1.91724	0.161111	0.560172	0.531417	0.60002	1.19865	-0.00269976	0.614824	0.697679	1.4809	0.386767	-0.346408	-0.454455	-0.14265	0.103719	-0.205855	-0.181898	-0.388005	0.727278	-0.22871	0.750871
-42.4	1.60493	1.90709	0.140201	0.513331	0.508018	0.690892	1.18614	-0.00393393	0.605165	0.719567	1.55024	0.389261	-0.338144	-0.494708	-0.170103	0.137121	-0.21065	-0.192694	-0.381462	0.693746	-0.231345	0.732162
-41.92	1.59049	1.89536	0.115145	0.478361	0.479203	0.786101	1.17012	-0.00149669	0.59856	0.742154	1.60318	0.389432	-0.325686	-0.524973	-0.192063	0.173189	-0.201432	-0.203732	-0.38091	0.664017	-0.239902	0.698262
-41.44	1.59254	1.87765	0.083754	0.451993	0.437381	0.870323	1.15639	0.00237718	0.600713	0.760054	1.61736	0.389736	-0.311372	-0.540923	-0.198056	0.204614	-0.184596	-0.213177	-0.382185	0.638102	-0.256824	0.654146
-40.96	1.59969	1.85021	0.0473552	0.424195	0.383423	0.937265	1.09196	0.00575334	0.617576	0.773381	1.58838	0.391273	-0.294804	-0.544902	-0.181685	0.223302	-0.167008	-0.222288	-0.377961	0.612811	-0.282965	0.60927
-40.48	1.59555	1.8059	0.0101152	0.393933	0.327344	0.985338	1.09208	0.00821154	0.641011	0.787426	1.53949	0.391293	-0.278617	-0.540338	-0.147243	0.225259	-0.153834	-0.231351	-0.365185	0.584304	-0.312409	0.569339
-40	1.57045	1.74159	-0.0217581	0.363955	0.282715	1.0148	1.09725	0.0112921	0.661762	0.809892	1.51448	0.386314	-0.264013	-0.529915	-0.103772	0.214949	-0.145446	-0.241684	-0.344293	0.553215	-0.341695	0.534288
-39.52	1.52745	1.66194	-0.0461262	0.344792	0.260638	1.03089	1.10734	0.0165378	0.662831	0.844914	1.55253	0.373685	-0.249389	-0.513365	-0.0592041	0.199953	-0.13877	-0.251963	-0.321724	0.520392	-0.366917	0.500811
-39.04	1.4789	1.58026	-0.0629367	0.342671	0.258492	1.04106	1.12096	0.0243069	0.639566	0.891754	1.64977	0.355069	-0.233204	-0.488851	-0.0170639	0.188501	-0.131981	-0.259844	-0.305312	0.487456	-0.390158	0.466754
-38.56	1.44756	1.51294	-0.0772574	0.355341	0.266943	1.06278	1.13712	0.0329173	0.595245	0.942679	1.75287	0.33224	-0.214154	-0.458545	0.0229385	0.181448	-0.124618	-0.261999	-0.30043	0.455274	-0.414436	0.435266
-38.08	1.44829	1.4721	-0.0916588	0.373866	0.27521	1.10983	1.15512	0.0395855	0.541234	0.990615	1.79184	0.306068	-0.191609	-0.430646	0.0606642	0.176122	-0.120154	-0.25487	-0.305659	0.423596	-0.441604	0.412388
-37.6	1.47731	1.45381	-0.107138	0.393436	0.278844	1.18511	1.17326	0.0430226	0.499104	1.03095	1.72414	0.279644	-0.166414	-0.417673	0.0912559	0.169226	-0.123219	-0.236285	-0.314293	0.393612	-0.465247	0.402897
-37.12	1.51803	1.44382	-0.11799	0.411006	0.281021	1.2748	1.1875	0.0458177	0.479882	1.062	1.57185	0.256216	-0.141064	-0.429155	0.108838	0.159988	-0.137223	-0.205529	-0.317546	0.367235	-0.482304	0.40571
-36.64	1.54948	1.42559	-0.121101	0.429974	0.287171	1.35484	1.19695	0.050335	0.485695	1.08484	1.40178	0.243348	-0.116621	-0.46562	0.11101	0.153321	-0.159903	-0.165254	-0.310441	0.34792	-0.488817	0.411709
-36.16	1.55961	1.39239	-0.119182	0.450712	0.303079	1.4117	1.19889	0.0576344	0.500767	1.10014	1.28565	0.251131	-0.0933991	-0.518002	0.100301	0.150399	-0.186755	-0.121741	-0.293318	0.335815	-0.487485	0.410964
-35.68	1.54922	1.3524	-0.118617	0.471973	0.324457	1.44254	1.1941	0.0649899	0.501197	1.11072	1.25367	0.284861	-0.0704968	-0.572015	0.0857838	0.145675	-0.210333	-0.0820105	-0.270251	0.328665	-0.485632	0.398144
-35.2	1.53583	1.31812	-0.123219	0.484353	0.344764	1.45706	1.18743	0.0674151	0.471997	1.11419	1.28468	0.342926	-0.046971	-0.616825	0.074997	0.130669	-0.226321	-0.0526444	-0.244492	0.320997	-0.490872	0.375702
-34.72	1.53566	1.29704	-0.128676	0.477944	0.354869	1.46933	1.18812	0.0617928	0.411836	1.11137	1.33368	0.412222	-0.0243295	-0.646777	0.0729316	0.098311	-0.232535	-0.0343794	-0.216328	0.309255	-0.503031	0.353371
-34.24	1.54895	1.28927	-0.127029	0.450957	0.351228	1.48449	1.20408	0.0481365	0.337137	1.10089	1.36627	0.475993	-0.00514782	-0.666661	0.0759419	0.0520373	-0.229589	-0.0259935	-0.183672	0.29155	-0.5185	0.338365
-33.76	1.56803	1.28287	-0.106281	0.407471	0.333218	1.50079	1.23999	0.0312481	0.270648	1.08279	1.37466	0.5186	0.00537517	-0.688317	0.079063	0.00503477	-0.218386	-0.0216279	-0.145186	0.272073	-0.529334	0.331184
-33.28	1.5752	1.27133	-0.0609369	0.363957	0.307766	1.51409	1.29468	0.0181138	0.224716	1.05761	1.36922	0.538123	0.0048618	-0.722065	0.0782884	-0.0253337	-0.197028	-0.0161473	-0.101586	0.254583	-0.532775	0.326364
-32.8	1.56708	1.25646	0.0033372	0.333099	0.279338	1.52129	1.35861	0.0124485	0.1966	1.02927	1.35648	0.542196	-0.00740064	-0.7715	0.0741814	-0.029707	-0.164324	-0.0074069	-0.0561492	0.242469	-0.530398	0.317607
-32.32	1.55552	1.24591	0.0729996	0.321122	0.256641	1.52327	1.41888	0.0150658	0.172139	1.00476	1.33002	0.544698	-0.0285731	-0.832408	0.0699849	-0.0105149	-0.120215	0.00630921	-0.014472	0.235924	-0.527067	0.303267
-31.84	1.57342	1.24085	0.136759	0.3251	0.241017	1.52097	1.46523	0.0241527	0.139126	0.990786	1.27495	0.556093	-0.0563769	-0.889488	0.0689554	0.0195749	-0.0704574	0.0230756	0.020719	0.23252	-0.5281	0.286347
-31.36	1.63856	1.23463	0.186437	0.334393	0.234803	1.5139	1.49384	0.0356526	0.0965168	0.996008	1.18866	0.577531	-0.0855711	-0.930452	0.076338	0.0451009	-0.0251409	0.0428524	0.0489108	0.229413	-0.534415	0.273267
-30.88	1.75415	1.21288	0.227431	0.333409	0.239481	1.50494	1.50805	0.0469106	0.055312	1.02204	1.08198	0.601106	-0.111862	-0.944777	0.0903204	0.057204	0.00467485	0.0639826	0.0718222	0.223596	-0.539131	0.26774
-30.4	1.90156	1.17207	0.265178	0.308339	0.251798	1.50325	1.51338	0.0562722	0.025179	1.0616	0.977112	0.615386	-0.129983	-0.933956	0.107898	0.0560977	0.0132923	0.0848473	0.0897292	0.212881	-0.535526	0.267399
-29.92	2.05113	1.12429	0.306502	0.250622	0.270873	1.52228	1.51869	0.0635201	0.00810656	1.10288	0.893278	0.611259	-0.135989	-0.905995	0.126344	0.0426398	0.00505643	0.103445	0.101426	0.197429	-0.515993	0.267862
-29.44	2.18267	1.09178	0.34953	0.158908	0.293948	1.57331	1.52816	0.0695083	-0.000398306	1.1331	0.84126	0.590198	-0.127049	-0.873432	0.142397	0.0245825	-0.00800493	0.117896	0.108386	0.180078	-0.481159	0.264069
-28.96	2.29264	1.09155	0.388906	0.037557	0.31625	1.65303	1.53976	0.0770534	-0.00134332	1.1441	0.817788	0.560862	-0.104339	-0.84602	0.152181	0.00708501	-0.0122966	0.127464	0.112239	0.163391	-0.433671	0.25559
-28.48	2.38737	1.12247	0.419698	-0.101845	0.333618	1.73747	1.55334	0.0883451	0.00340435	1.13775	0.817505	0.539147	-0.0721195	-0.825505	0.154184	-0.00414055	-0.00134474	0.131834	0.116886	0.150984	-0.381062	0.243042
-28	2.47408	1.1668	0.443319	-0.243024	0.346731	1.79855	1.56845	0.105153	0.0176613	1.12221	0.829989	0.53238	-0.0381254	-0.808199	0.148394	-0.00796826	0.0205803	0.131654	0.126794	0.141224	-0.332938	0.22979
-27.52	2.55309	1.20099	0.468539	-0.366932	0.355896	1.81669	1.58476	0.125891	0.0441381	1.10668	0.848005	0.544397	-0.007142	-0.788047	0.138254	-0.00276323	0.0432954	0.127595	0.144232	0.13352	-0.293006	0.216346
-27.04	2.61713	1.21062	0.500624	-0.459209	0.364727	1.8031	1.60033	0.146526	0.0791212	1.09483	0.860486	0.566913	0.0182362	-0.762336	0.12831	0.00842124	0.0567604	0.120228	0.170201	0.126429	-0.262595	0.202308
-26.56	2.66756	1.19882	0.539148	-0.512801	0.377771	1.78186	1.61383	0.163434	0.11563	1.08618	0.85928	0.592191	0.0410697	-0.733009	0.121374	0.0217123	0.057238	0.112193	0.20252	0.11968	-0.237983	0.189338
-26.08	2.72005	1.17789	0.573994	-0.525594	0.396403	1.77786	1.62541	0.177281	0.149951	1.07703	0.835978	0.614811	0.0658522	-0.703557	0.116086	0.0350191	0.0476413	0.104886	0.237374	0.11409	-0.216565	0.17987
-25.6	2.78936	1.15923	0.59326	-0.512813	0.414847	1.80064	1.63575	0.191184	0.188621	1.06917	0.789113	0.633241	0.0958223	-0.676543	0.10822	0.0488872	0.0342584	0.0998775	0.272761	0.110829	-0.194361	0.175155
-25.12	2.87959	1.14379	0.588571	-0.488511	0.428419	1.83323	1.64947	0.210281	0.241382	1.06424	0.720004	0.64378	0.130265	-0.651856	0.0958308	0.0670212	0.021583	0.0959538	0.304859	0.110783	-0.170336	0.173449
-24.64	2.98004	1.12921	0.566048	-0.458818	0.433682	1.85162	1.66735	0.235962	0.312975	1.06603	0.63847	0.64358	0.164424	-0.626955	0.0801242	0.0873271	0.00990918	0.0903278	0.332089	0.112753	-0.148656	0.171383
-24.16	3.07005	1.11429	0.542156	-0.423532	0.428206	1.84352	1.68722	0.265074	0.394708	1.07308	0.559199	0.627606	0.19282	-0.600384	0.0675116	0.106466	-0.000613248	0.0808171	0.35323	0.116594	-0.13654	0.166294
-23.68	3.12598	1.10759	0.53253	-0.373497	0.417761	1.82012	1.70133	0.291761	0.469176	1.08107	0.50155	0.594964	0.212072	-0.573928	0.0628941	0.120114	-0.00907707	0.0670451	0.368628	0.122487	-0.140914	0.155162
-23.2	3.1336	1.12002	0.545503	-0.304353	0.406469	1.80704	1.69813	0.312142	0.52083	1.08871	0.479473	0.55149	0.222412	-0.550245	0.0688218	0.127026	-0.0125402	0.052531	0.380534	0.132075	-0.164462	0.141851
-22.72	3.09399	1.16108	0.577125	-0.222093	0.395049	1.82387	1.67189	0.326726	0.539778	1.09816	0.496538	0.509228	0.225485	-0.531518	0.0824627	0.128575	-0.00999999	0.0397726	0.390719	0.145081	-0.200265	0.128268
-22.24	3.0147	1.22291	0.609084	-0.141762	0.380455	1.86524	1.62509	0.3406	0.530903	1.11686	0.540834	0.483362	0.222643	-0.517535	0.0959	0.129534	-0.00245491	0.0336227	0.399689	0.161864	-0.238894	0.115355
-21.76	2.91343	1.2873	0.634019	-0.0746611	0.359836	1.90453	1.56756	0.3589	0.500628	1.15134	0.594913	0.47891	0.214603	-0.505533	0.102996	0.134317	0.00423855	0.032564	0.40808	0.181035	-0.272117	0.101676
-21.28	2.80597	1.33325	0.647194	-0.0228792	0.334461	1.91622	1.5112	0.382975	0.456964	1.19412	0.642632	0.491612	0.201417	-0.490885	0.102828	0.144593	0.00629515	0.0327268	0.414443	0.202505	-0.297146	0.0867112
-20.8	2.70492	1.34818	0.653113	0.0268561	0.310557	1.89173	1.46204	0.410798	0.400985	1.23215	0.677016	0.511001	0.185259	-0.470147	0.0982615	0.160815	0.00274434	0.0303583	0.417485	0.227395	-0.31483	0.0720258
-20.32	2.62335	1.33731	0.659215	0.0898369	0.292603	1.84959	1.41845	0.438545	0.337102	1.24734	0.699052	0.528979	0.169489	-0.441796	0.0929376	0.186364	-0.00326789	0.0259983	0.415786	0.254988	-0.329224	0.0626454
-19.84	2.56199	1.31751	0.668869	0.168869	0.28577	1.81715	1.37732	0.463708	0.276794	1.23214	0.712734	0.541073	0.158337	-0.40729	0.0903595	0.222772	-0.00722112	0.0258299	0.408793	0.279527	-0.344748	0.0621035
-19.36	2.51857	1.3046	0.676935	0.254293	0.292663	1.81941	1.33751	0.486802	0.23375	1.19634	0.724202	0.546984	0.151408	-0.365859	0.0928522	0.272196	-0.00858175	0.0375197	0.397917	0.294122	-0.363307	0.0705299
-18.88	2.48673	1.30695	0.677904	0.325452	0.310195	1.8585	1.30506	0.510738	0.223583	1.16193	0.737286	0.548215	0.145003	-0.315646	0.101722	0.329598	-0.00915764	0.0658011	0.383857	0.295684	-0.385072	0.0858087
-18.4	2.47092	1.32139	0.667642	0.363862	0.335855	1.91166	1.287	0.537383	0.24527	1.14914	0.754838	0.542924	0.135304	-0.253224	0.115948	0.38683	-0.0124806	0.107691	0.368404	0.286064	-0.4092	0.103042
-17.92	2.48293	1.33353	0.653374	0.367547	0.369633	1.94915	1.28246	0.567533	0.289654	1.16556	0.778744	0.533372	0.119151	-0.178676	0.135695	0.439259	-0.020575	0.155723	0.353744	0.272547	-0.433641	0.120086
-17.44	2.53406	1.33396	0.645181	0.347289	0.41111	1.948	1.2819	0.598992	0.345198	1.20348	0.809201	0.52268	0.0995696	-0.096025	0.159259	0.485543	-0.0303409	0.20398	0.341467	0.264808	-0.456046	0.136219
-16.96	2.62681	1.31891	0.655089	0.322707	0.455839	1.90172	1.27575	0.630031	0.402903	1.24955	0.840914	0.517429	0.0822985	-0.0127322	0.184882	0.528984	-0.0366123	0.249764	0.332594	0.266361	-0.470809	0.149829
-16.48	2.74694	1.29329	0.685915	0.310235	0.497503	1.82553	1.25643	0.658687	0.466058	1.28989	0.865599	0.521742	0.0729244	0.0625677	0.211188	0.571331	-0.0369191	0.294303	0.329355	0.272022	-0.473437	0.155561
-16	2.86819	1.26506	0.732048	0.31858	0.52963	1.74276	1.23163	0.684014	0.539103	1.32339	0.874446	0.533925	0.0737859	0.12412	0.239316	0.61056	-0.0330806	0.339862	0.33369	0.273292	-0.463827	0.150235
-15.52	2.96868	1.2409	0.781695	0.34958	0.551034	1.68321	1.21673	0.704536	0.625955	1.35472	0.865475	0.548869	0.0823015	0.170044	0.269234	0.640277	-0.0291828	0.38476	0.344908	0.263699	-0.445234	0.13405
-15.04	3.03796	1.22045	0.821547	0.392404	0.566711	1.65781	1.22363	0.719868	0.724768	1.39215	0.849063	0.560059	0.0957597	0.199051	0.302649	0.655554	-0.0308703	0.423502	0.361272	0.244646	-0.427347	0.113193
-14.56	3.08167	1.20058	0.790016	0.431838	0.586105	1.6642	1.25238	0.730564	0.828518	1.43852	0.836027	0.569845	0.111861	0.212594	0.337716	0.657233	-0.0401969	0.451499	0.378597	0.224172	-0.414189	0.0967651
-14.08	3.11281	1.17718	0.797034	0.452754	0.616902	1.68125	1.29028	0.738513	0.930353	1.48953	0.837689	0.581155	0.130634	0.209551	0.372917	0.653286	-0.0539494	0.46732	0.390702	0.211165	-0.410961	0.0885777
-13.6	3.13571	1.15009	0.787819	0.447905	0.658539	1.6757	1.32245	0.746404	1.02299	1.53727	0.85268	0.602161	0.150651	0.189325	0.404478	0.654711	-0.0666683	0.476457	0.39166	0.20746	-0.415858	0.0887845
-13.12	3.15038	1.12556	0.763695	0.420509	0.704787	1.62707	1.33632	0.756745	1.09837	1.57727	0.867672	0.631439	0.170598	0.15678	0.434907	0.665101	-0.0735768	0.485387	0.379052	0.210431	-0.424487	0.0877572
-12.64	3.15305	1.1085	0.728112	0.386287	0.745203	1.53088	1.33203	0.770383	1.15025	1.60836	0.864693	0.659056	0.184726	0.119405	0.469221	0.682801	-0.071979	0.500002	0.355671	0.210752	-0.433713	0.0789833
-12.16	3.13883	1.09893	0.689671	0.36437	0.772578	1.41146	1.31663	0.787455	1.17631	1.63334	0.836357	0.674462	0.191042	0.0862202	0.510948	0.701744	-0.0632821	0.520494	0.329583	0.204857	-0.441599	0.059425
-11.68	3.10769	1.09338	0.655674	0.365549	0.791279	1.29766	1.2946	0.807452	1.18309	1.64471	0.789538	0.670749	0.191341	0.0617606	0.559371	0.713698	-0.0511747	0.540333	0.309843	0.194201	-0.448434	0.0328807
-11.2	3.05881	1.08343	0.634679	0.386706	0.806292	1.22028	1.26722	0.830688	1.1848	1.66161	0.740683	0.646986	0.190048	0.044329	0.606175	0.722839	-0.0401664	0.55569	0.301915	0.183884	-0.45794	0.00676109
-10.72	2.99328	1.06773	0.628296	0.41839	0.824423	1.18102	1.23137	0.856585	1.1911	1.6741	0.707618	0.608432	0.193087	0.0289232	0.640827	0.734647	-0.0341624	0.562947	0.307639	0.177299	-0.473222	-0.0164687
-10.24	2.90633	1.05125	0.631155	0.447728	0.845263	1.1636	1.18803	0.88368	1.20232	1.67981	0.693597	0.561104	0.201114	0.0103623	0.658518	0.75695	-0.0364525	0.564548	0.323746	0.173863	-0.496421	-0.0365928
-9.76	2.80287	1.04568	0.635801	0.467897	0.865543	1.15269	1.14026	0.908441	1.20603	1.68051	0.68787	0.50847	0.210386	-0.0114605	0.663991	0.790834	-0.049735	0.564512	0.343817	0.170065	-0.529468	-0.0564225
-9.28	2.69185	1.06222	0.636337	0.480671	0.879297	1.14555	1.09732	0.928429	1.18817	1.6815	0.671431	0.449194	0.215326	-0.0325669	0.667702	0.827954	-0.0752516	0.565352	0.362031	0.163154	-0.569122	-0.0768627
-8.8	2.58515	1.10558	0.633211	0.489162	0.885087	1.14743	1.06707	0.942531	1.14164	1.69158	0.631314	0.381983	0.211556	-0.0451162	0.679305	0.856078	-0.111957	0.565786	0.375602	0.153737	-0.609272	-0.0945369
-8.32	2.4916	1.16983	0.629015	0.491952	0.887085	1.16518	1.04726	0.952864	1.08308	1.71175	0.573244	0.308474	0.198093	-0.0464282	0.7046	0.86472	-0.154997	0.563337	0.385058	0.144941	-0.646376	-0.10641
-7.84	2.41327	1.239	0.628489	0.484389	0.894161	1.1899	1.03342	0.962115	1.03807	1.73742	0.514128	0.235113	0.180819	-0.0375042	0.735983	0.849429	-0.198245	0.556936	0.392038	0.13929	-0.679248	-0.11109
-7.36	2.34952	1.29556	0.631878	0.465327	0.914026	1.20057	1.01798	0.972314	1.03195	1.75993	0.474104	0.168849	0.16577	-0.0253939	0.7667	0.813765	-0.236606	0.545813	0.400126	0.135332	-0.713463	-0.110478
-6.88	2.2945	1.33185	0.639787	0.44076	0.949353	1.17973	0.996469	0.983133	1.06675	1.77068	0.464704	0.116804	0.161304	-0.0193119	0.795571	0.768838	-0.269903	0.53277	0.411908	0.127771	-0.754669	-0.108275
-6.4	2.24636	1.35094	0.658058	0.423573	0.996167	1.13565	0.971622	0.991325	1.12869	1.77165	0.491373	0.0838346	0.16953	-0.0272631	0.825958	0.720687	-0.302077	0.522039	0.429412	0.11138	-0.806704	-0.107504
-5.92	2.2063	1.36351	0.689282	0.42368	1.0486	1.09396	0.946788	0.995354	1.19312	1.77098	0.546601	0.071879	0.190497	-0.0508759	0.861383	0.672845	-0.338469	0.516907	0.450844	0.0853491	-0.866391	-0.10693
-5.44	2.17491	1.38082	0.737652	0.441995	1.09934	1.07837	0.928922	0.994701	1.24676	1.77962	0.619571	0.0764478	0.218132	-0.0851544	0.899276	0.620917	-0.379479	0.518816	0.469731	0.0554249	-0.924263	-0.102896
-4.96	2.15442	1.40638	0.804892	0.467877	1.14368	1.09516	0.918507	0.992303	1.2901	1.8013	0.697536	0.0923121	0.24494	-0.118978	0.925946	0.562802	-0.414353	0.527494	0.47937	0.0285703	-0.968637	-0.0919087
-4.48	2.14341	1.43796	0.877693	0.489557	1.17978	1.12788	0.913326	0.991846	1.3246	1.83066	0.765527	0.108291	0.266316	-0.136474	0.927483	0.497537	-0.428662	0.540577	0.475094	0.0109058	-0.993457	-0.0738817
-4	2.13914	1.4676	0.946185	0.493952	1.20858	1.15329	0.909425	0.995168	1.34779	1.85553	0.806105	0.116667	0.280582	-0.126524	0.900392	0.43289	-0.412192	0.554435	0.457389	0.00371597	-1.00053	-0.0507047
-3.52	2.14348	1.48641	1.00143	0.480157	1.22872	1.16269	0.908411	1.00156	1.34356	1.86641	0.813053	0.116595	0.291329	-0.0870034	0.852589	0.380272	-0.366258	0.567469	0.43171	0.00312347	-0.997939	-0.0277811
-3.04	2.16333	1.49545	1.0471	0.454649	1.24108	1.17031	0.910651	1.00801	1.30225	1.85946	0.791883	0.115871	0.303568	-0.0259015	0.797685	0.345798	-0.304637	0.579484	0.406587	0.00116109	-0.994665	-0.00884094
-2.56	2.21104	1.49779	1.09189	0.426639	1.24596	1.19544	0.923113	1.01307	1.22346	1.84003	0.758345	0.121023	0.319963	0.0408687	0.746986	0.327863	-0.245407	0.590688	0.387214	-0.00602801	-0.99481	0.00205065
-2.08	2.2877	1.50039	1.14507	0.403919	1.25072	1.24697	0.95008	1.01714	1.12679	1.81905	0.723895	0.140781	0.33787	0.0986011	0.700862	0.314221	-0.200076	0.600655	0.375274	-0.018241	-1.0007	0.00267212
-1.6	2.38692	1.50699	1.21195	0.387621	1.25772	1.31	0.993383	1.02415	1.04092	1.80365	0.688454	0.175885	0.351216	0.14076	0.656311	0.295351	-0.166154	0.610582	0.369642	-0.0321968	-1.00991	-0.00816767
-1.12	2.48378	1.518	1.2907	0.375326	1.27146	1.36424	1.04758	1.03917	0.986995	1.7954	0.639187	0.221233	0.357201	0.170855	0.609088	0.264496	-0.135172	0.620747	0.371244	-0.0425804	-1.01884	-0.0273854
-0.64	2.55222	1.53078	1.37102	0.358183	1.29348	1.39809	1.10397	1.06614	0.970268	1.79152	0.56787	0.274532	0.356497	0.19258	0.564214	0.227379	-0.0977475	0.633743	0.381417	-0.0482665	-1.02445	-0.0524262
-0.16	2.58402	1.53868	1.44018	0.325143	1.32143	1.42218	1.15152	1.1047	0.982074	1.78885	0.485919	0.33713	0.355301	0.212364	0.531687	0.19492	-0.0531612	0.651989	0.402135	-0.0500708	-1.02387	-0.0781941
0.32	2.5859	1.53762	1.48961	0.279306	1.35136	1.45565	1.18327	1.15056	1.00992	1.78743	0.422599	0.410781	0.363603	0.229274	0.516571	0.172972	-0.00829826	0.677038	0.43168	-0.051774	-1.01374	-0.100306
0.8	2.58267	1.52792	1.51529	0.235406	1.37923	1.51493	1.19765	1.19753	1.04668	1.79152	0.387506	0.493905	0.384974	0.243203	0.517732	0.16048	0.0296132	0.708322	0.461225	-0.0566507	-0.992173	-0.116511
1.28	2.60069	1.51047	1.51935	0.215473	1.40037	1.60413	1.19857	1.24021	1.09008	1.80578	0.37168	0.57762	0.418669	0.255951	0.530092	0.150781	0.0602541	0.739832	0.479449	-0.0624757	-0.962429	-0.128864
1.76	2.64548	1.49082	1.50578	0.242014	1.41248	1.7166	1.19412	1.27636	1.14372	1.8273	0.34495	0.645972	0.454689	0.26635	0.546864	0.137649	0.0876692	0.76556	0.475967	-0.0665654	-0.933017	-0.141265
2.24	2.70566	1.46902	1.48435	0.321009	1.41388	1.8406	1.1881	1.30679	1.21268	1.84717	0.294503	0.689237	0.483631	0.275101	0.562664	0.120455	0.11527	0.782646	0.449409	-0.0647417	-0.911636	-0.157462
2.72	2.75845	1.44838	1.46232	0.435327	1.40861	1.96108	1.18254	1.33346	1.30094	1.85166	0.254198	0.712302	0.501612	0.277702	0.577034	0.100619	0.143451	0.792492	0.406505	-0.0571744	-0.907002	-0.177885
3.2	2.78823	1.43094	1.44629	0.556293	1.39844	2.06238	1.18107	1.35672	1.41146	1.82945	0.292602	0.732214	0.513855	0.274584	0.584084	0.0809842	0.167794	0.802435	0.358384	-0.0482051	-0.916188	-0.199812
3.68	2.7925	1.42563	1.43732	0.656283	1.39155	2.13578	1.1857	1.37416	1.54224	1.7819	0.463656	0.766802	0.532147	0.270179	0.58	0.0615003	0.18535	0.820246	0.314641	-0.0409242	-0.932207	-0.219808
4.16	2.78698	1.4356	1.43896	0.724167	1.39124	2.18466	1.20173	1.38265	1.68002	1.72234	0.753116	0.823501	0.565193	0.276103	0.560247	0.0383867	0.197276	0.850005	0.279442	-0.0404552	-0.9466	-0.235889
4.64	2.78208	1.46012	1.44583	0.769319	1.39883	2.23223	1.23297	1.38229	1.80429	1.67069	1.06445	0.890929	0.61527	0.303065	0.52826	0.0127112	0.217938	0.889098	0.251561	-0.044044	-0.953754	-0.248788
5.12	2.77989	1.49356	1.45493	0.799611	1.4139	2.30549	1.2774	1.37582	1.88942	1.64228	1.2771	0.948725	0.673872	0.350124	0.490967	-0.0111862	0.236759	0.929469	0.229373	-0.0478136	-0.955225	-0.258588
5.6	2.77841	1.52165	1.46676	0.824292	1.43299	2.41201	1.32723	1.37028	1.92117	1.6406	1.32077	0.976781	0.728956	0.402235	0.461995	-0.025774	0.261832	0.963087	0.211911	-0.050231	-0.956168	-0.265701
6.08	2.76486	1.53635	1.47985	0.843097	1.45558	2.52571	1.37217	1.37261	1.89603	1.65564	1.22964	0.974614	0.770678	0.436988	0.446476	-0.0254233	0.287455	0.986753	0.200342	-0.0511857	-0.961706	-0.270291
6.56	2.7402	1.54122	1.50168	0.850863	1.48011	2.59821	1.40169	1.38581	1.83367	1.67163	1.1116	0.952674	0.798434	0.442076	0.45082	-0.0133698	0.306573	1.00232	0.197624	-0.054281	-0.971028	-0.269556
7.04	2.71628	1.54684	1.53625	0.84844	1.50403	2.59436	1.41199	1.40819	1.75638	1.67773	1.07183	0.929576	0.817446	0.42405	0.472141	-0.000934601	0.315748	1.01565	0.204573	-0.0625923	-0.980745	-0.262141
7.52	2.69972	1.56386	1.58275	0.847196	1.5231	2.52062	1.40695	1.43513	1.68199	1.67544	1.14133	0.917041	0.834804	0.408822	0.505313	-0.000200687	0.31461	1.03	0.217188	-0.0766962	-0.983888	-0.247011
8	2.69086	1.59843	1.63185	0.855828	1.53348	2.41922	1.39209	1.46088	1.6272	1.67342	1.2647	0.918824	0.850917	0.416529	0.542693	-0.019477	0.306818	1.04512	0.233422	-0.0932183	-0.978294	-0.225223
8.48	2.68322	1.64137	1.67739	0.878865	1.53257	2.3342	1.37188	1.48094	1.59384	1.68087	1.35211	0.928281	0.861339	0.448889	0.579813	-0.0579945	0.29269	1.05846	0.24966	-0.108102	-0.966518	-0.200504
8.96	2.66838	1.6743	1.70867	0.911214	1.51918	2.27323	1.34857	1.49413	1.57694	1.6999	1.35503	0.937354	0.85862	0.486886	0.610979	-0.108295	0.272884	1.06831	0.266471	-0.118803	-0.955069	-0.180306
9.44	2.6475	1.68193	1.72495	0.939577	1.49723	2.20205	1.32417	1.50301	1.5666	1.72294	1.29144	0.942061	0.841225	0.501601	0.632166	-0.158987	0.248214	1.07524	0.283877	-0.126956	-0.950299	-0.170843
9.92	2.6376	1.66619	1.73177	0.955266	1.47188	2.07974	1.30269	1.51023	1.55218	1.7385	1.22203	0.940725	0.815565	0.478156	0.645137	-0.202034	0.224227	1.08222	0.301546	-0.136593	-0.95065	-0.179964
10.4	2.66013	1.64324	1.73522	0.954227	1.45186	1.90876	1.28793	1.51901	1.52869	1.74141	1.20126	0.937115	0.792317	0.425998	0.65296	-0.237055	0.209709	1.09034	0.316797	-0.14869	-0.951876	-0.208489
10.88	2.71897	1.62978	1.73804	0.945052	1.4446	1.74233	1.28553	1.53189	1.49958	1.73228	1.23412	0.939953	0.779868	0.373986	0.658479	-0.265569	0.210961	1.09855	0.326804	-0.16387	-0.951766	-0.249528
11.36	2.80777	1.63323	1.7412	0.940794	1.45671	1.65114	1.29564	1.54829	1.47725	1.71952	1.28377	0.954053	0.780508	0.349624	0.662389	-0.288746	0.22909	1.09868	0.329721	-0.178972	-0.948068	-0.290933
11.84	2.90334	1.64594	1.74443	0.947737	1.49016	1.67166	1.31196	1.5656	1.474	1.71133	1.30736	0.981531	0.787036	0.361639	0.6611	-0.304714	0.257075	1.0865	0.329298	-0.190773	-0.941784	-0.320541
12.32	2.98613	1.65107	1.74867	0.966195	1.5397	1.77316	1.32702	1.58122	1.49154	1.71034	1.28786	1.02145	0.792801	0.402942	0.650326	-0.307002	0.283382	1.06094	0.329885	-0.197304	-0.932942	-0.332885
12.8	3.05164	1.63903	1.75904	0.989766	1.59381	1.88513	1.33158	1.59324	1.51756	1.7166	1.24131	1.06292	0.793523	0.455037	0.63327	-0.289556	0.298113	1.02858	0.336136	-0.20063	-0.921365	-0.332093
13.28	3.11318	1.61436	1.78208	1.00044	1.63849	1.94837	1.32208	1.60179	1.53837	1.72513	1.20005	1.09367	0.789426	0.502821	0.615816	-0.254361	0.293747	0.997791	0.348624	-0.202322	-0.90524	-0.3283
13.76	3.18974	1.59184	1.81579	0.991631	1.66288	1.95807	1.30033	1.60819	1.53685	1.72998	1.17782	1.10723	0.78496	0.540462	0.607776	-0.2106	0.270842	0.975662	0.364307	-0.20555	-0.884581	-0.329377
14.24	3.2899	1.58738	1.85465	0.957535	1.6663	1.95539	1.27347	1.61505	1.51369	1.72567	1.16484	1.10555	0.784341	0.568505	0.609913	-0.169915	0.234227	0.963081	0.379848	-0.2103	-0.865185	-0.336131
14.72	3.40196	1.60725	1.89435	0.913293	1.65753	1.98388	1.24681	1.62356	1.474	1.70907	1.14551	1.09603	0.789995	0.590963	0.619449	-0.141852	0.193145	0.953385	0.39444	-0.217339	-0.854928	-0.343505
15.2	3.50171	1.64164	1.93288	0.88033	1.64858	2.04648	1.22608	1.63379	1.4307	1.68171	1.10158	1.08878	0.799779	0.611181	0.629786	-0.129878	0.15745	0.938366	0.410013	-0.225886	-0.858725	-0.343715
15.68	3.56226	1.6759	1.97183	0.873176	1.64846	2.10687	1.20949	1.64389	1.39327	1.65337	1.03857	1.08475	0.812094	0.630162	0.639075	-0.129215	0.135024	0.914773	0.427806	-0.236491	-0.874532	-0.333979
16.16	3.57502	1.69992	2.01158	0.895368	1.65644	2.12361	1.19381	1.65159	1.36252	1.63633	0.976426	1.07954	0.823757	0.647701	0.649319	-0.132866	0.128001	0.883457	0.448455	-0.248554	-0.894743	-0.319469
16.64	3.55564	1.7169	2.04688	0.939721	1.6666	2.08536	1.17285	1.6553	1.33421	1.63984	0.939362	1.06716	0.833181	0.665114	0.662417	-0.137284	0.133578	0.849452	0.469368	-0.261577	-0.909769	-0.305381
17.12	3.53376	1.74217	2.07293	0.988568	1.67321	2.02017	1.14616	1.65365	1.30543	1.66273	0.93725	1.04462	0.838331	0.681771	0.67686	-0.141838	0.14501	0.818636	0.486854	-0.276897	-0.915337	-0.295232
17.6	3.53723	1.79363	2.08342	1.03063	1.67652	1.96751	1.11594	1.64769	1.27808	1.6954	0.963167	1.01683	0.838545	0.697634	0.684172	-0.145303	0.155387	0.793771	0.498961	-0.29291	-0.911364	-0.287531
18.08	3.574	1.87752	2.08072	1.07034	1.68162	1.95022	1.09624	1.63976	1.25846	1.72202	0.992895	0.99352	0.835791	0.715419	0.675516	-0.146404	0.15992	0.774156	0.50456	-0.310451	-0.901738	-0.280742
18.56	3.6279	1.98694	2.06738	1.11222	1.68422	1.95848	1.09398	1.63315	1.2568	1.73295	1.00812	0.981268	0.835344	0.737389	0.648779	-0.144761	0.158847	0.756197	0.505542	-0.326297	-0.888895	-0.275348
19.04	3.67205	2.10506	2.04812	1.16031	1.70102	1.96684	1.11089	1.62861	1.2849	1.72955	1.00404	0.980934	0.842196	0.765681	0.611064	-0.140866	0.155978	0.738447	0.502576	-0.33958	-0.871674	-0.274583
19.52	3.68577	2.20795	2.02775	1.21762	1.7195	1.95657	1.13778	1.62745	1.34815	1.72291	0.996676	0.988445	0.860078	0.796248	0.576927	-0.140963	0.155089	0.71771	0.495155	-0.351553	-0.847274	-0.282103
20	3.66467	2.28035	2.00373	1.26853	1.73491	1.92816	1.15894	1.62855	1.44073	1.72299	1.00564	1.00176	0.887994	0.821347	0.556935	-0.146845	0.161635	0.693638	0.484694	-0.365216	-0.816599	-0.296609
20.48	3.61855	2.31654	1.97791	1.3048	1.74609	1.89453	1.16635	1.63148	1.54494	1.73492	1.03725	1.02003	0.920771	0.833129	0.553824	-0.158911	0.176149	0.663761	0.472311	-0.384928	-0.785259	-0.31376
20.96	3.55697	2.32368	1.96062	1.31817	1.75411	1.87008	1.16077	1.63531	1.63767	1.75302	1.07559	1.04389	0.94874	0.830778	0.561136	-0.172211	0.196418	0.627325	0.462117	-0.414531	-0.763341	-0.326355
21.44	3.48791	2.31729	1.9596	1.31221	1.76433	1.8646	1.15498	1.64063	1.69821	1.76751	1.10023	1.07154	0.961833	0.823331	0.569069	-0.18192	0.21719	0.585151	0.456571	-0.452303	-0.754722	-0.332441
21.92	3.41995	2.31207	1.97867	1.2937	1.77571	1.88748	1.1623	1.64843	1.71846	1.77101	1.10218	1.09611	0.953934	0.819197	0.573119	-0.186369	0.23177	0.540078	0.456584	-0.494279	-0.757646	-0.334143
22.4	3.36667	2.31889	2.01282	1.27293	1.78767	1.95117	1.18854	1.6597	1.70356	1.76396	1.08446	1.10903	0.925001	0.822794	0.575156	-0.190746	0.23603	0.497374	0.459802	-0.534501	-0.758963	-0.33576
22.88	3.34885	2.34245	2.05035	1.2575	1.80034	2.06153	1.22397	1.67587	1.666	1.75237	1.07181	1.10358	0.880788	0.828779	0.581168	-0.198953	0.231606	0.460756	0.459897	-0.568005	-0.745608	-0.344653
23.36	3.37909	2.37617	2.07704	1.24891	1.812	2.21004	1.25271	1.69626	1.61658	1.7429	1.07708	1.0856	0.831858	0.826991	0.59555	-0.213559	0.223348	0.43215	0.453372	-0.595349	-0.710688	-0.362489
23.84	3.44682	2.41242	2.08994	1.24781	1.82408	2.36315	1.25886	1.71874	1.56219	1.73598	1.09199	1.06626	0.788423	0.814	0.620129	-0.230594	0.216487	0.410936	0.439994	-0.620103	-0.660508	-0.388095
24.32	3.5206	2.44262	2.09196	1.24793	1.8373	2.47749	1.23928	1.73857	1.50511	1.72483	1.09526	1.05916	0.754957	0.795007	0.651452	-0.24066	0.213737	0.393372	0.425768	-0.646544	-0.607757	-0.417518
24.8	3.57295	2.46164	2.08719	1.24959	1.84853	2.51888	1.20358	1.75114	1.44726	1.70209	1.06602	1.07095	0.732075	0.780577	0.684839	-0.239688	0.21049	0.374874	0.418411	-0.678422	-0.568741	-0.447306
25.28	3.59934	2.4652	2.07487	1.2479	1.85544	2.48383	1.16515	1.75259	1.39339	1.66225	1.00224	1.09728	0.716675	0.777806	0.717025	-0.229342	0.201523	0.3518	0.422958	-0.715466	-0.552382	-0.476268
25.76	3.63107	2.45567	2.04949	1.24076	1.85976	2.40618	1.13641	1.74426	1.34962	1.61284	0.921488	1.12654	0.705421	0.782895	0.743634	-0.213255	0.185039	0.323102	0.439756	-0.754521	-0.559032	-0.506957
26.24	3.70611	2.43329	2.01019	1.22965	1.8654	2.32742	1.11687	1.73103	1.31495	1.56747	0.855191	1.14643	0.695205	0.782822	0.759582	-0.193115	0.166487	0.288133	0.461793	-0.79047	-0.579934	-0.542158
26.72	3.8387	2.40192	1.96306	1.21372	1.88045	2.27692	1.10116	1.71947	1.28164	1.53827	0.815178	1.14996	0.683982	0.766484	0.759937	-0.166254	0.156126	0.249143	0.479646	-0.819961	-0.603978	-0.583382
27.2	3.99805	2.36997	1.91933	1.19431	1.90663	2.25895	1.081	1.71369	1.24036	1.53207	0.79767	1.13863	0.66842	0.731649	0.741142	-0.131655	0.159589	0.209684	0.487491	-0.843396	-0.625862	-0.628219
27.68	4.12466	2.34602	1.8891	1.17595	1.94057	2.2585	1.05121	1.71327	1.18825	1.54073	0.779028	1.11822	0.647441	0.686089	0.704459	-0.088189	0.17609	0.171296	0.484823	-0.863043	-0.644267	-0.6707
28.16	4.17113	2.33678	1.87829	1.16153	1.97673	2.25428	1.01873	1.71413	1.13502	1.55176	0.74461	1.08927	0.624453	0.641039	0.655839	-0.0446382	0.195419	0.134964	0.476319	-0.884089	-0.664699	-0.70338
28.64	4.13443	2.33988	1.89043	1.15383	2.00966	2.2377	0.990624	1.71269	1.09545	1.55591	0.692345	1.05062	0.604712	0.604289	0.606002	-0.0110694	0.20521	0.10017	0.46661	-0.911068	-0.689678	-0.721872
29.12	4.0588	2.3018	1.92582	1.14894	2.04042	2.21819	0.972655	1.70721	1.07935	1.55055	0.635279	1.00186	0.59528	0.576523	0.566194	0.008464	0.196731	0.066753	0.456842	-0.946735	-0.718271	-0.730276
29.6	4.00559	2.29143	1.98245	1.13493	2.07508	2.21708	0.963146	1.69826	1.09241	1.54123	0.589877	0.949512	0.599401	0.55429	0.542862	0.0182217	0.170323	0.0358107	0.441716	-0.9918	-0.746658	-0.737461
30.08	4.01188	2.26884	2.05631	1.10141	2.11693	2.25132	0.955507	1.68685	1.12469	1.53399	0.565033	0.906228	0.61179	0.534347	0.534834	0.0252018	0.134546	0.0107218	0.415398	-1.0439	-0.768088	-0.753382
30.56	4.06575	2.24219	2.1386	1.05163	2.16532	2.32453	0.9419	1.67275	1.16586	1.53044	0.563473	0.885696	0.625294	0.517105	0.53663	0.0334533	0.0979238	-0.0051414	0.373986	-1.09846	-0.779187	-0.784089
31.04	4.13022	2.22118	2.21337	1.00247	2.21357	2.42267	0.922132	1.65528	1.21034	1.52447	0.581087	0.897463	0.629386	0.504648	0.539713	0.037623	0.0652805	-0.0123459	0.32357	-1.14977	-0.780664	-0.824181
31.52	4.16753	2.21272	2.26143	0.974838	2.25345	2.51846	0.902008	1.63561	1.25732	1.50755	0.606619	0.936992	0.621405	0.500189	0.538721	0.0309348	0.0369767	-0.0150917	0.274567	-1.19323	-0.778257	-0.863183
32	4.16732	2.21601	2.27729	0.985827	2.27409	2.57731	0.890174	1.61722	1.30949	1.47644	0.626072	0.991155	0.60526	0.503984	0.532815	0.011391	0.0113542	-0.0183666	0.240818	-1.22906	-0.778554	-0.890526
32.48	4.14831	2.22691	2.26639	1.02741	2.27351	2.58755	0.89172	1.60458	1.36651	1.43821	0.632636	1.04523	0.588989	0.515457	0.523966	-0.0116344	-0.0113944	-0.024298	0.228695	-1.25839	-0.787892	-0.904072
32.96	4.14496	2.23944	2.24255	1.07485	2.24935	2.54205	0.90493	1.59975	1.42488	1.40304	0.617804	1.08796	0.579356	0.531878	0.513391	-0.0191547	-0.0294126	-0.0298592	0.234766	-1.2856	-0.805562	-0.907847
33.44	4.1717	2.25045	2.21598	1.09924	2.2061	2.46008	0.923169	1.60106	1.47111	1.37971	0.581993	1.12135	0.577791	0.55391	0.503905	-0.00143676	-0.0413255	-0.0302699	0.249711	-1.31267	-0.827526	-0.909949
33.92	4.22616	2.25945	2.18801	1.08222	2.15048	2.36264	0.94021	1.60349	1.49246	1.36651	0.530369	1.14839	0.58134	0.582628	0.495801	0.0411178	-0.0496779	-0.0215746	0.262169	-1.3383	-0.846458	-0.91545
34.4	4.28707	2.26608	2.15611	1.03274	2.08968	2.26512	0.954363	1.6045	1.47887	1.35521	0.477256	1.17217	0.58413	0.618235	0.492231	0.0934196	-0.0602227	-0.00747125	0.266843	-1.36109	-0.859532	-0.925289
34.88	4.33425	2.26543	2.11346	0.974127	2.03167	2.17752	0.967571	1.60444	1.43053	1.34205	0.42322	1.19503	0.583736	0.657904	0.495889	0.137856	-0.0768142	0.00461915	0.263937	-1.37751	-0.866328	-0.935678
35.36	4.35348	2.2501	2.06396	0.932291	1.98253	2.09114	0.986499	1.60575	1.35351	1.32729	0.367397	1.21556	0.57894	0.698772	0.506063	0.163688	-0.100153	0.00658152	0.258335	-1.38725	-0.869663	-0.941444
35.84	4.34465	2.21885	2.02026	0.917079	1.94466	2.00018	1.00922	1.61023	1.26598	1.31757	0.30377	1.23288	0.572103	0.737417	0.52196	0.169495	-0.123551	-0.0048441	0.256547	-1.39366	-0.873574	-0.940309
36.32	4.30499	2.17713	1.99128	0.91979	1.91768	1.90287	1.03388	1.61587	1.18291	1.31689	0.235854	1.24931	0.56538	0.774454	0.539319	0.165549	-0.14025	-0.0258843	0.259879	-1.39795	-0.879319	-0.933671
36.8	4.23319	2.13243	1.98119	0.922442	1.90278	1.80331	1.0561	1.61803	1.1068	1.32127	0.171162	1.26549	0.563566	0.814373	0.552992	0.160081	-0.147972	-0.047946	0.265141	-1.40377	-0.885295	-0.928647
37.28	4.12926	2.09052	1.98222	0.910571	1.89912	1.71667	1.07268	1.613	1.02836	1.32065	0.120888	1.27618	0.567088	0.861266	0.560241	0.156897	-0.152215	-0.0657051	0.266722	-1.41354	-0.889043	-0.931184
37.76	4.00467	2.05549	1.98218	0.882035	1.90899	1.65381	1.08349	1.60015	0.929486	1.30929	0.0935555	1.27464	0.575668	0.917181	0.563225	0.156574	-0.161138	-0.0791731	0.258598	-1.42908	-0.889489	-0.945693
38.24	3.88613	2.02359	1.97275	0.851155	1.92584	1.62715	1.08749	1.58323	0.799135	1.29017	0.0843541	1.25384	0.585309	0.979911	0.566992	0.157296	-0.178742	-0.0923074	0.240524	-1.44945	-0.88508	-0.972433
38.72	3.80913	1.99304	1.95996	0.832726	1.94585	1.64636	1.0851	1.56769	0.650236	1.27538	0.0814201	1.21647	0.59067	1.04018	0.57246	0.157769	-0.200681	-0.109285	0.21614	-1.4721	-0.877352	-1.00877
39.2	3.79783	1.96526	1.95626	0.835799	1.96045	1.71498	1.0784	1.55764	0.513992	1.27946	0.0676257	1.17371	0.588521	1.08544	0.579238	0.154941	-0.218752	-0.131247	0.191668	-1.48286	-0.866339	-1.0494
39.68	3.85276	1.94908	1.97998	0.860629	1.96494	1.82061	1.06605	1.55387	0.433786	1.30425	0.0364956	1.13993	0.579719	1.10626	0.584558	0.141437	-0.227099	-0.154979	0.173317	-1.49348	-0.855651	-1.08592
40.16	3.93607	1.95614	2.04031	0.895492	1.95869	1.94012	1.05092	1.55472	0.430563	1.33281	-0.0134152	1.12315	0.568142	1.09981	0.587119	0.111623	-0.230212	-0.177174	0.164165	-1.49142	-0.851943	-1.11309
40.64	4.00202	1.98711	2.13091	0.935761	1.94717	2.04047	1.03562	1.55675	0.492621	1.34424	-0.0701899	1.1233	0.55828	1.07266	0.588026	0.0633111	-0.239376	-0.199303	0.161473	-1.47885	-0.856906	-1.12804
41.12	4.01393	2.02688	2.23547	0.977866	1.93588	2.10419	1.02034	1.55631	0.581651	1.32256	-0.123475	1.13162	0.551656	1.03785	0.591135	0.00479499	-0.264949	-0.223846	0.161007	-1.4611	-0.870027	-1.13368
41.6	3.96597	2.05218	2.3306	1.02509	1.92814	2.12824	1.00618	1.55005	0.652518	1.26992	-0.167773	1.13612	0.544495	1.01108	0.601711	-0.0507959	-0.305321	-0.253474	0.156391	-1.4452	-0.88622	-1.13682
42.08	3.88357	2.04902	2.3997	1.07648	1.92019	2.12892	0.987174	1.53697	0.685968	1.20333	-0.200153	1.13464	0.534368	1.00188	0.617239	-0.0924668	-0.348952	-0.289244	0.143806	-1.43345	-0.902926	-1.14408
42.56	3.79986	2.01536	2.43882	1.13251	1.90941	2.11562	0.957033	1.51738	0.690242	1.14495	-0.218523	1.13015	0.519017	1.01285	0.637315	-0.120829	-0.376877	-0.328027	0.127072	-1.42262	-0.919575	-1.15804
43.04	3.73634	1.96679	2.44905	1.19428	1.89129	2.09264	0.914874	1.49453	0.692196	1.10849	-0.227777	1.12901	0.502876	1.06478	0.655779	-0.141359	-0.379315	-0.365696	0.109374	-1.40831	-0.939431	-1.17722
43.52	3.6846	1.92845	2.4436	1.26254	1.86495	2.03999	0.857812	1.47297	0.714886	1.09403	-0.236221	1.13435	0.49101	1.09691	0.670187	-0.164309	-0.358822	-0.401184	0.096015	-1.38912	-0.969977	-1.19516
44	3.62132	1.91736	2.42787	1.34719	1.8331	1.94356	0.795276	1.45747	0.75639	1.09242	-0.245603	1.14313	0.486873	1.12615	0.682649	-0.194362	-0.32801	-0.435776	0.0876036	-1.36776	-1.01084	-1.20684
44.48	3.52492	1.92968	2.40551	1.44586	1.80007	1.79301	0.733711	1.45102	0.80414	1.09332	-0.265438	1.14764	0.485641	1.14772	0.692311	-0.224693	-0.300331	-0.472445	0.0790877	-1.35115	-1.055	-1.21222
44.96	3.39531	1.94909	2.3778	1.5495	1.77166	1.59831	0.683419	1.45347	0.840966	1.09089	-0.299227	1.14616	0.481254	1.15827	0.701464	-0.25028	-0.280845	-0.511227	0.0658704	-1.3424	-1.09075	-1.21464
45.44	3.24335	1.95724	2.35004	1.63104	1.75127	1.37709	0.647796	1.46302	0.860005	1.08259	-0.344171	1.14087	0.471178	1.16012	0.70767	-0.27	-0.268019	-0.547503	0.0456463	-1.3402	-1.10956	-1.21921
45.92	3.09366	1.94625	2.33484	1.6737	1.73822	1.14756	0.623662	1.47443	0.866095	1.06729	-0.397173	1.13545	0.448165	1.15702	0.71243	-0.288742	-0.256698	-0.576572	0.0193671	-1.34136	-1.11031	-1.22728
46.4	2.96052	1.92171	2.34361	1.67331	1.72661	0.921484	0.604677	1.48277	0.868908	1.04411	-0.446988	1.13088	0.430731	1.15364	0.716984	-0.311765	-0.246296	-0.596904	-0.00899391	-1.34302	-1.09947	-1.23453
46.88	2.84674	1.89915	2.37994	1.64525	1.71265	0.703811	0.582605	1.48409	0.862422	1.01278	-0.489344	1.12428	0.43222	1.14984	0.723956	-0.339746	-0.240801	-0.612028	-0.0336063	-1.34492	-1.08429	-1.23474
47.36	2.74435	1.8898	2.43597	1.61005	1.69413	0.505665	0.554173	1.47708	0.845172	0.976227	-0.521319	1.10808	0.455904	1.1411	0.733821	-0.361552	-0.24377	-0.628376	-0.0529028	-1.35183	-1.06986	-1.22477
47.84	2.64966	1.8949	2.49441	1.57698	1.66965	0.339721	0.522244	1.46391	0.815563	0.941514	-0.551878	1.0748	0.49259	1.12044	0.749407	-0.365743	-0.255166	-0.650918	-0.0672435	-1.36402	-1.05041	-1.20854
48.32	2.55927	1.90692	2.5377	1.53938	1.64106	0.208421	0.49135	1.44994	0.783215	0.916267	-0.590562	1.02547	0.527818	1.08426	0.771941	-0.34657	-0.271148	-0.681417	-0.0774753	-1.38098	-1.02224	-1.19492
48.8	2.47551	1.91636	2.55949	1.48414	1.61033	0.103273	0.465922	1.44036	0.765086	0.90284	-0.64256	0.967098	0.548395	1.03412	0.801491	-0.31228	-0.287092	-0.714671	-0.0825613	-1.39842	-0.983393	-1.19208
49.28	2.40256	1.91267	2.55997	1.40869	1.58094	0.00670176	0.448076	1.4366	0.771613	0.896156	-0.705514	0.911558	0.552237	0.980454	0.837102	-0.27482	-0.303212	-0.747117	-0.0822067	-1.41152	-0.939488	-1.20152
49.76	2.34587	1.89039	2.54197	1.33614	1.55579	-0.0936269	0.435029	1.43592	0.796693	0.886112	-0.76822	0.870237	0.545899	0.935156	0.875385	-0.246299	-0.323202	-0.775097	-0.0761671	-1.4179	-0.899592	-1.21944
50.24	2.30546	1.84922	2.50758	1.29752	1.53599	-0.194714	0.423509	1.43271	0.81953	0.863711	-0.819274	0.847368	0.539863	0.906597	0.908675	-0.226483	-0.348088	-0.799155	-0.0678599	-1.41827	-0.86986	-1.23652
50.72	2.27631	1.7978	2.45161	1.31105	1.52352	-0.281386	0.412212	1.4224	0.82384	0.826273	-0.849298	0.843832	0.540278	0.89766	0.932733	-0.206007	-0.372779	-0.823275	-0.0623929	-1.41651	-0.852074	-1.24995
51.2	2.25123	1.74603	2.37397	1.36341	1.5145	-0.347039	0.402614	1.40614	0.811148	0.782519	-0.857117	0.852658	0.547986	0.900927	0.942223	-0.175788	-0.387237	-0.849914	-0.0644752	-1.41673	-0.840863	-1.25937
51.68	2.21943	1.70244	2.27997	1.41636	1.50332	-0.397759	0.396769	1.39018	0.799913	0.743175	-0.844384	0.862053	0.559418	0.900761	0.939565	-0.129962	-0.383275	-0.878553	-0.0778266	-1.42151	-0.833382	-1.27011
52.16	2.17946	1.67158	2.18356	1.43114	1.48354	-0.453097	0.395926	1.38003	0.81358	0.720839	-0.817584	0.864524	0.569301	0.88678	0.930826	-0.0704958	-0.364473	-0.904456	-0.100472	-1.43304	-0.829464	-1.287
52.64	2.13652	1.6519	2.10253	1.39253	1.44908	-0.515244	0.401396	1.3789	0.856846	0.721966	-0.779691	0.855722	0.574414	0.853447	0.92123	-0.00828232	-0.342174	-0.924425	-0.128757	-1.45025	-0.831535	-1.31196
53.12	2.1022	1.63404	2.04153	1.31552	1.40056	-0.571347	0.409269	1.38446	0.913965	0.745329	-0.742265	0.839645	0.571721	0.806856	0.915553	0.0512752	-0.333433	-0.937343	-0.156817	-1.47173	-0.8423	-1.34402
53.6	2.09759	1.60836	1.9992	1.22182	1.34324	-0.590907	0.414045	1.39155	0.951947	0.78659	-0.718727	0.824502	0.563045	0.761371	0.913778	0.102066	-0.344194	-0.943297	-0.181941	-1.49276	-0.861762	-1.38229
54.08	2.12989	1.57093	1.96361	1.12048	1.28677	-0.553306	0.411751	1.39432	0.94375	0.835524	-0.723784	0.819392	0.551365	0.730688	0.916945	0.143769	-0.367424	-0.943941	-0.202828	-1.50761	-0.884935	-1.42559
54.56	2.19576	1.51913	1.9237	1.00932	1.2415	-0.467374	0.40019	1.39017	0.888164	0.885069	-0.759256	0.827956	0.544613	0.722383	0.925587	0.178946	-0.385413	-0.938666	-0.221088	-1.51476	-0.904194	-1.47105
55.04	2.27674	1.45568	1.87742	0.884693	1.21388	-0.360902	0.37969	1.37965	0.806785	0.929022	-0.811358	0.844424	0.548143	0.730158	0.940258	0.20996	-0.384483	-0.928473	-0.23881	-1.5155	-0.917466	-1.51506
55.52	2.34654	1.38214	1.82506	0.755969	1.20411	-0.267599	0.354954	1.36563	0.729985	0.959689	-0.855263	0.859224	0.563223	0.739151	0.9581	0.23792	-0.361167	-0.913489	-0.256692	-1.5144	-0.927592	-1.55028
56	2.38312	1.30729	1.77683	0.651649	1.20779	-0.189481	0.333247	1.35186	0.682162	0.97486	-0.872072	0.867183	0.583842	0.736326	0.972877	0.265447	-0.325267	-0.900145	-0.274036	-1.51623	-0.943104	-1.57032
56.48	2.37212	1.24364	1.73817	0.596842	1.21918	-0.105815	0.319273	1.34171	0.662991	0.976118	-0.86455	0.867852	0.600608	0.715248	0.976051	0.293981	-0.290485	-0.894682	-0.289925	-1.52465	-0.972698	-1.57498
56.96	2.31414	1.20109	1.71342	0.592464	1.23349	0.0102595	0.314979	1.337	0.658598	0.969024	-0.853414	0.868046	0.609383	0.683969	0.960303	0.321063	-0.266346	-0.901287	-0.300452	-1.53967	-1.01994	-1.56878
57.44	2.22213	1.18699	1.70385	0.609687	1.2455	0.163264	0.314195	1.3366	0.648454	0.964911	-0.864429	0.872531	0.614451	0.657766	0.923619	0.342132	-0.252808	-0.92024	-0.305344	-1.55918	-1.07967	-1.56
57.92	2.12789	1.19553	1.71032	0.61014	1.25508	0.326492	0.30962	1.33632	0.622574	0.970826	-0.905434	0.88669	0.623709	0.650881	0.873605	0.356119	-0.243069	-0.946676	-0.304418	-1.57774	-1.14011	-1.55803
58.4	2.05601	1.21007	1.72564	0.570362	1.26153	0.454643	0.292612	1.33041	0.583062	0.98829	-0.956178	0.908791	0.642056	0.6651	0.820128	0.364079	-0.232602	-0.971524	-0.302009	-1.59038	-1.19214	-1.56775
58.88	2.02849	1.21392	1.73896	0.503115	1.26755	0.512872	0.25839	1.3142	0.537609	1.01005	-0.985273	0.936518	0.663378	0.690662	0.773197	0.366403	-0.220835	-0.991167	-0.300626	-1.59295	-1.22957	-1.58655
59.36	2.05487	1.1998	1.7381	0.439496	1.27205	0.501004	0.21052	1.28724	0.497413	1.02102	-0.966833	0.968348	0.675524	0.713594	0.737262	0.364366	-0.213364	-1.00611	-0.303451	-1.58405	-1.25605	-1.60782
59.84	2.12723	1.17258	1.71549	0.407123	1.27522	0.445572	0.157026	1.25326	0.466376	1.0105	-0.899123	1.00716	0.666509	0.723375	0.710676	0.354284	-0.215362	-1.02015	-0.310071	-1.567	-1.27702	-1.62301
60.32	2.22313	1.15129	1.6744	0.41468	1.27691	0.386392	0.105082	1.21782	0.445491	0.97442	-0.80289	1.04921	0.634876	0.71832	0.689888	0.333389	-0.227453	-1.03582	-0.317523	-1.548	-1.29692	-1.62779
60.8	2.31502	1.14475	1.62756	0.436005	1.27666	0.355447	0.0628752	1.1865	0.435155	0.919991	-0.712247	1.08943	0.592132	0.704719	0.670549	0.300285	-0.246899	-1.04929	-0.325364	-1.53357	-1.31647	-1.62329
61.28	2.37532	1.15624	1.58233	0.444304	1.2741	0.369318	0.0315422	1.16145	0.433699	0.859561	-0.64555	1.11841	0.555152	0.690827	0.653519	0.260502	-0.267683	-1.05472	-0.33221	-1.52454	-1.33647	-1.6171
61.76	2.38465	1.17297	1.54655	0.428808	1.2679	0.425565	0.0148479	1.14071	0.440361	0.806873	-0.608093	1.12834	0.537161	0.676753	0.645559	0.226668	-0.284903	-1.04749	-0.340086	-1.51705	-1.35509	-1.61652
62.24	2.34127	1.18314	1.51653	0.404421	1.25848	0.508182	0.0116718	1.12171	0.453418	0.766608	-0.591483	1.1182	0.540918	0.661521	0.652885	0.210424	-0.296811	-1.02875	-0.349231	-1.50526	-1.37327	-1.62532
62.72	2.26075	1.18077	1.49252	0.396525	1.24419	0.594399	0.0217056	1.10223	0.463237	0.735685	-0.582512	1.09184	0.560787	0.642225	0.677514	0.217436	-0.304952	-1.00856	-0.359586	-1.47167	-1.39039	-1.64142
63.2	2.17131	1.17191	1.47283	0.421111	1.22272	0.656882	0.042957	1.08189	0.470312	0.707229	-0.57622	1.05668	0.586594	0.624222	0.71289	0.24302	-0.312762	-0.995943	-0.371638	-1.44332	-1.40773	-1.65793
63.68	2.10036	1.15929	1.46064	0.473115	1.19382	0.670404	0.0712548	1.06245	0.477985	0.67401	-0.571941	1.01605	0.612198	0.615994	0.749229	0.276551	-0.323261	-0.99583	-0.384218	-1.41357	-1.42386	-1.66661
64.16	2.05687	1.14824	1.46013	0.52967	1.15722	0.618042	0.102603	1.04548	0.498293	0.633206	-0.572624	0.972234	0.632446	0.625994	0.775496	0.31012	-0.33811	-1.00334	-0.39816	-1.38722	-1.44078	-1.6644
64.64	2.02705	1.13604	1.46844	0.567833	1.11817	0.501741	0.133556	1.03254	0.538425	0.586033	-0.581753	0.922875	0.644362	0.653159	0.786543	0.339778	-0.356201	-1.00771	-0.412444	-1.36674	-1.4603	-1.65552
65.12	1.99106	1.1211	1.48307	0.576919	1.08154	0.338147	0.15937	1.02429	0.592321	0.537481	-0.602371	0.867993	0.644945	0.688716	0.786168	0.369333	-0.376439	-1.00008	-0.42723	-1.34873	-1.48637	-1.64565
65.6	1.94061	1.0997	1.50118	0.564002	1.04983	0.155304	0.175622	1.02039	0.644477	0.488629	-0.636877	0.810702	0.633985	0.717	0.784173	0.402506	-0.396891	-0.978356	-0.438107	-1.33042	-1.52004	-1.64031
66.08	1.88705	1.07167	1.52379	0.543848	1.02596	-0.0252725	0.175941	1.01877	0.672249	0.441436	-0.687688	0.759402	0.615478	0.722035	0.787483	0.435926	-0.418337	-0.947558	-0.444589	-1.30956	-1.56035	-1.63921
66.56	1.85547	1.03836	1.55263	0.529546	1.00788	-0.184271	0.157313	1.01673	0.663847	0.397995	-0.758989	0.724076	0.595563	0.700376	0.797695	0.462662	-0.441392	-0.916829	-0.448034	-1.28857	-1.60305	-1.64096
67.04	1.8737	0.999657	1.58657	0.525941	0.991002	-0.320672	0.120233	1.00977	0.620647	0.359912	-0.846916	0.712046	0.57919	0.656217	0.809975	0.474056	-0.46599	-0.890521	-0.451966	-1.27155	-1.64379	-1.64276
67.52	1.94482	0.955092	1.61937	0.533845	0.971449	-0.439603	0.0732917	0.995253	0.556991	0.330817	-0.936045	0.72126	0.566548	0.600438	0.81786	0.468648	-0.48923	-0.869478	-0.460138	-1.26144	-1.68321	-1.64621
68	2.04479	0.906127	1.64245	0.55277	0.946978	-0.548261	0.0299404	0.974518	0.48767	0.30699	-1.0078	0.74379	0.553167	0.543335	0.813158	0.454535	-0.506228	-0.848559	-0.473446	-1.25437	-1.72406	-1.65364
68.48	2.13834	0.857714	1.6501	0.574704	0.915071	-0.641295	-0.000381331	0.951647	0.423576	0.283484	-1.0432	0.770179	0.533639	0.493348	0.794758	0.445918	-0.511205	-0.824672	-0.488487	-1.24662	-1.76779	-1.66639
68.96	2.20213	0.81307	1.64181	0.592354	0.877201	-0.709798	-0.0167234	0.930905	0.372188	0.255689	-1.03014	0.797068	0.507574	0.452667	0.763651	0.453849	-0.502172	-0.798065	-0.498535	-1.2341	-1.81433	-1.68194
69.44	2.23521	0.774339	1.62631	0.596143	0.835127	-0.753782	-0.0233989	0.915244	0.345254	0.227897	-0.969318	0.825087	0.477728	0.418441	0.721748	0.484628	-0.481597	-0.772308	-0.499644	-1.21758	-1.85117	-1.69442
69.92	2.2518	0.741762	1.61218	0.581171	0.791768	-0.781931	-0.027478	0.904079	0.347316	0.210534	-0.87653	0.857703	0.448045	0.387562	0.672594	0.53097	-0.457864	-0.751127	-0.492587	-1.20173	-1.86714	-1.70011
70.4	2.27106	0.710426	1.60828	0.554161	0.745284	-0.807598	-0.0326834	0.89512	0.385802	0.217904	-0.770937	0.892158	0.421918	0.359208	0.624229	0.579261	-0.439266	-0.734822	-0.482665	-1.19253	-1.85575	-1.6995
70.88	2.29744	0.678216	1.61571	0.530826	0.697998	-0.84359	-0.0383899	0.888296	0.447082	0.256	-0.668378	0.918273	0.398343	0.336488	0.58411	0.619986	-0.429623	-0.7205	-0.477736	-1.19088	-1.82438	-1.69639
71.36	2.31296	0.63847	1.63184	0.521636	0.650727	-0.893283	-0.038814	0.884236	0.501079	0.320111	-0.570262	0.920364	0.37773	0.325934	0.557305	0.651393	-0.42771	-0.704436	-0.481052	-1.19511	-1.78747	-1.69668
71.84	2.29966	0.591765	1.65143	0.530833	0.597023	-0.933168	-0.0319884	0.885363	0.515376	0.392217	-0.46904	0.889876	0.361897	0.334376	0.547577	0.677795	-0.414597	-0.683044	-0.49195	-1.20095	-1.76094	-1.70226
72.32	2.24719	0.538091	1.666	0.552752	0.543314	-0.936792	-0.0183841	0.891639	0.470144	0.453669	-0.356999	0.832806	0.354771	0.363951	0.554459	0.705214	-0.406803	-0.656745	-0.505947	-1.20354	-1.75479	-1.70957
72.8	2.16739	0.478782	1.6716	0.573869	0.492423	-0.890185	-0.00370204	0.899596	0.376079	0.495059	-0.235117	0.765995	0.357988	0.408014	0.575538	0.739654	-0.387779	-0.626864	-0.518851	-1.2007	-1.76504	-1.71494
73.28	2.07845	0.417343	1.66054	0.582519	0.445331	-0.805826	0.00854337	0.904095	0.263048	0.517909	-0.114358	0.709728	0.367784	0.455598	0.604848	0.782852	-0.358418	-0.596539	-0.529805	-1.194	-1.77957	-1.71665
73.76	1.99149	0.359023	1.62813	0.577702	0.402701	-0.710371	0.0173171	0.902023	0.165942	0.533458	-0.00803925	0.673516	0.378021	0.49333	0.635894	0.82989	-0.32394	-0.566335	-0.542941	-1.186	-1.78507	-1.71617
74.24	1.90421	0.307836	1.57417	0.555504	0.365296	-0.627795	0.0225575	0.894247	0.0983987	0.551075	0.0750664	0.653469	0.38224	0.514057	0.662774	0.880091	-0.292462	-0.53424	-0.563914	-1.1795	-1.78065	-1.71489
74.72	1.81295	0.266484	1.50271	0.52219	0.33437	-0.558623	0.0278807	0.884847	0.0538475	0.571265	0.14039	0.634965	0.378482	0.518118	0.678744	0.933795	-0.271255	-0.498241	-0.596406	-1.17819	-1.77139	-1.7151
75.2	1.71634	0.235282	1.42287	0.480783	0.312518	-0.489268	0.033162	0.877411	0.0203601	0.588333	0.195105	0.606996	0.369825	0.512917	0.682152	0.986291	-0.262769	-0.454686	-0.637956	-1.18563	-1.76856	-1.71455
75.68	1.6306	0.214447	1.3484	0.439323	0.300653	-0.403146	0.0414098	0.873487	-0.00745165	0.595355	0.243585	0.56715	0.361174	0.506842	0.674892	1.03804	-0.264215	-0.405839	-0.683827	-1.20144	-1.77796	-1.71023
76.16	1.57865	0.199594	1.28559	0.405299	0.286489	-0.304647	0.0545053	0.871359	-0.0187727	0.591349	0.278176	0.521668	0.354195	0.503134	0.65925	1.08144	-0.270345	-0.359033	-0.7238	-1.26979	-1.79728	-1.70316
76.64	1.57797	0.191474	1.23726	0.389334	0.286539	-0.214662	0.072649	0.869607	-0.00514487	0.638715	0.289494	0.482534	0.346122	0.497624	0.643567	1.11464	-0.276524	-0.323592	-0.749727	-1.29952	-1.81496	-1.69586
77.12	1.62337	0.19081	1.19622	0.39282	0.285636	-0.155217	0.0933362	0.86836	0.0317325	0.638328	0.272824	0.453722	0.3323	0.481978	0.631512	1.12852	-0.279621	-0.305319	-0.757656	-1.331	-1.82301	-1.69073
77.6	1.69193	0.197916	1.15664	0.411249	0.281523	-0.128327	0.11112	0.868692	0.0707851	0.653049	0.23651	0.435662	0.310455	0.448134	0.62904	1.1251	-0.280386	-0.303986	-0.750345	-1.36272	-1.81795	-1.69015
78.08	1.75901	0.21211	1.12094	0.43036	0.27384	-0.113946	0.122691	0.870634	0.0871674	0.68208	0.198934	0.422087	0.281694	0.395479	0.639824	1.1044	-0.281201	-0.312246	-0.736654	-1.39571	-1.80667	-1.69152
78.56	1.80762	0.234897	1.09476	0.437194	0.266435	-0.0857122	0.129851	0.871885	0.0697777	0.716621	0.174253	0.405716	0.251465	0.335351	0.666781	1.07198	-0.28324	-0.323022	-0.726003	-1.43195	-1.79984	-1.69211
79.04	1.83193	0.265315	1.08602	0.423975	0.261499	-0.0345061	0.139586	0.869025	0.0288916	0.741819	0.161675	0.38325	0.224251	0.283055	0.708064	1.04172	-0.284182	-0.331986	-0.724514	-1.47107	-1.80573	-1.69141
79.52	1.83482	0.296657	1.09764	0.400499	0.26083	0.0150962	0.158325	0.859792	-0.0106431	0.752153	0.146447	0.35525	0.201203	0.252139	0.755921	1.0196	-0.280943	-0.339081	-0.732722	-1.50889	-1.82378	-1.69159
80	1.82568	0.323565	1.12031	0.382783	0.261073	0.0379751	0.186647	0.846136	-0.0341533	0.748618	0.112138	0.327154	0.18013	0.244368	0.79777	1.01353	-0.271556	-0.346356	-0.745221	-1.53849	-1.84865	-1.69335
80.48	1.81615	0.338967	1.14391	0.386861	0.263097	0.0203169	0.217859	0.833158	-0.0388201	0.737322	0.0529763	0.304653	0.160605	0.248755	0.818996	1.02489	-0.259744	-0.353465	-0.754298	-1.55613	-1.87122	-1.69802
80.96	1.82496	0.337848	1.15819	0.419317	0.265457	-0.0194416	0.243529	0.827584	-0.0422219	0.724996	-0.0194372	0.295989	0.142476	0.245906	0.814333	1.04443	-0.251561	-0.355833	-0.755473	-1.5623	-1.88848	-1.70295
81.44	1.8742	0.32191	1.1625	0.476824	0.269046	-0.0383485	0.257137	0.831043	-0.00744949	0.709417	-0.0820534	0.305723	0.128816	0.223846	0.789499	1.0585	-0.254078	-0.351275	-0.749144	-1.56246	-1.90068	-1.70631
81.92	1.97926	0.303508	1.16361	0.547469	0.272132	0.00448343	0.261881	0.841056	-0.0453587	0.68659	-0.116241	0.332513	0.121592	0.182839	0.758075	1.05584	-0.268738	-0.340474	-0.739072	-1.56312	-1.91191	-1.7081
82.4	2.12722	0.297116	1.16883	0.615356	0.274787	0.121191	0.265603	0.851533	-0.0836131	0.65168	-0.117393	0.365211	0.121897	0.13965	0.737666	1.03126	-0.289755	-0.329784	-0.731976	-1.56906	-1.92688	-1.70569
82.88	2.28611	0.314263	1.182	0.670217	0.27211	0.291876	0.273562	0.857587	-0.0982987	0.606648	-0.0990817	0.398791	0.127257	0.115341	0.733041	0.986896	-0.308567	-0.327589	-0.731406	-1.57943	-1.94405	-1.69986
83.36	2.41847	0.352642	1.19937	0.703831	0.263981	0.467954	0.285537	0.857086	-0.074782	0.560074	-0.08355	0.422753	0.13316	0.120159	0.737821	0.932296	-0.31647	-0.337155	-0.738853	-1.58978	-1.95888	-1.69027
83.84	2.50603	0.397898	1.21786	0.710655	0.251353	0.597429	0.294238	0.851147	-0.0182611	0.523893	-0.0869304	0.4389	0.136604	0.153011	0.734689	0.876848	-0.314977	-0.354414	-0.753175	-1.59485	-1.96165	-1.67636
84.32	2.56752	0.430128	1.23149	0.689354	0.238786	0.646413	0.290329	0.843084	0.0584536	0.503393	-0.106512	0.455222	0.136877	0.199546	0.707859	0.825621	-0.309715	-0.372159	-0.771002	-1.59167	-1.9511	-1.66296
84.8	2.63945	0.435892	1.24145	0.638942	0.22892	0.611257	0.269319	0.83597	0.138867	0.494461	-0.125854	0.4752	0.137613	0.243542	0.656268	0.786059	-0.308649	-0.385639	-0.787894	-1.58129	-1.93346	-1.65117
85.28	2.75021	0.414885	1.24568	0.566848	0.221356	0.518718	0.23592	0.832978	0.212354	0.488375	-0.121509	0.497311	0.14136	0.274421	0.588716	0.759888	-0.314749	-0.399169	-0.799543	-1.56502	-1.91541	-1.64724
85.76	2.89312	0.381256	1.24301	0.48107	0.211167	0.412097	0.197511	0.834096	0.271593	0.478941	-0.0753347	0.506904	0.149262	0.290424	0.521481	0.747624	-0.324285	-0.419206	-0.803435	-1.54525	-1.9081	-1.65101
86.24	3.03277	0.347226	1.23	0.393174	0.194485	0.333246	0.165744	0.838887	0.314587	0.469799	0.0104465	0.48926	0.158086	0.294299	0.468284	0.747757	-0.329018	-0.450558	-0.799881	-1.52283	-1.91526	-1.65917
86.72	3.12024	0.322389	1.20431	0.311261	0.170272	0.305647	0.145826	0.845762	0.336613	0.466909	0.117585	0.437857	0.163013	0.290593	0.430793	0.75092	-0.323508	-0.490443	-0.793922	-1.49877	-1.93214	-1.66678
87.2	3.13073	0.302455	1.16819	0.239756	0.14084	0.318249	0.137969	0.854026	0.338427	0.473521	0.217219	0.358438	0.158558	0.282126	0.404954	0.751552	-0.308007	-0.530472	-0.791355	-1.47405	-1.94904	-1.67079
87.68	3.07172	0.277188	1.12964	0.174545	0.112132	0.350354	0.141024	0.861861	0.321798	0.484889	0.290874	0.272059	0.143549	0.270649	0.383288	0.743554	-0.286806	-0.559038	-0.796841	-1.45218	-1.95732	-1.67088
88.16	2.9791	0.239621	1.09223	0.119001	0.0905548	0.382874	0.154459	0.867583	0.299757	0.488081	0.327649	0.197116	0.119668	0.259032	0.362851	0.729658	-0.26526	-0.571876	-0.809074	-1.43647	-1.95235	-1.66927
88.64	2.89739	0.191498	1.05977	0.0799274	0.076489	0.413759	0.175913	0.870155	0.282003	0.470253	0.332906	0.142507	0.0931857	0.248872	0.346768	0.718143	-0.244069	-0.570711	-0.820815	-1.42941	-1.93819	-1.66855
89.12	2.85027	0.144511	1.03233	0.0657449	0.0651833	0.459209	0.204664	0.868971	0.274747	0.429263	0.316426	0.100714	0.0687619	0.238283	0.339195	0.711509	-0.220597	-0.562694	-0.822647	-1.432	-1.92596	-1.66731
89.6	2.83887	0.105211	1.01425	0.0911556	0.051706	0.535756	0.238477	0.865933	0.275664	0.377328	0.285812	0.0586766	0.0492461	0.222903	0.342981	0.706383	-0.19566	-0.553145	-0.810021	-1.4412	-1.92246	-1.66159
90.08	2.85728	0.0744615	1.0073	0.15902	0.0314712	0.643123	0.273827	0.863899	0.274769	0.335164	0.249554	0.00672794	0.0324602	0.198991	0.3579	0.690846	-0.172878	-0.543022	-0.7862	-1.4505	-1.93026	-1.64988
90.56	2.89685	0.0459751	1.01134	0.259375	0.00524758	0.757317	0.306559	0.864936	0.262525	0.319885	0.213881	-0.0506408	0.0150967	0.169952	0.378286	0.651068	-0.159521	-0.528107	-0.759334	-1.45383	-1.94602	-1.63274
91.04	2.95719	0.0134387	1.01763	0.372043	-0.0221799	0.846717	0.336247	0.868893	0.230756	0.332982	0.188593	-0.098309	-0.00626537	0.145822	0.396529	0.58604	-0.157522	-0.502983	-0.738345	-1.44703	-1.96089	-1.61552
91.52	3.03921	-0.0225822	1.01373	0.469207	-0.0433635	0.89066	0.364921	0.873052	0.183334	0.362443	0.17854	-0.127471	-0.0308775	0.139803	0.407208	0.506912	-0.159598	-0.465298	-0.726075	-1.43323	-1.96593	-1.59939
92	3.14001	-0.0506342	0.992543	0.538861	-0.058682	0.890922	0.3957	0.870881	0.128851	0.390911	0.180221	-0.136811	-0.0557649	0.160532	0.406691	0.434357	-0.153931	-0.418366	-0.716927	-1.41922	-1.95785	-1.58009
92.48	3.24743	-0.0596516	0.960885	0.581161	-0.0724397	0.865859	0.428897	0.859043	0.0817969	0.405474	0.181086	-0.139766	-0.0769247	0.203829	0.395832	0.381573	-0.131038	-0.369038	-0.703024	-1.41041	-1.93734	-1.55786
92.96	3.33927	-0.046986	0.930899	0.606327	-0.0881463	0.83975	0.462119	0.8384	0.0550489	0.403678	0.171017	-0.151301	-0.0913244	0.254617	0.378108	0.353613	-0.0916926	-0.326786	-0.679482	-1.40926	-1.91346	-1.53009
93.44	3.39615	-0.0207183	0.919766	0.624835	-0.108718	0.827437	0.493691	0.815441	0.0510869	0.392043	0.145399	-0.179972	-0.100554	0.292655	0.364308	0.344978	-0.0477994	-0.299204	-0.649702	-1.41019	-1.89446	-1.50215
93.92	3.40989	0.00350145	0.929303	0.643676	-0.128337	0.836225	0.521761	0.796651	0.0662873	0.381667	0.109767	-0.220195	-0.108949	0.304183	0.35888	0.343774	-0.0148677	-0.288319	-0.621107	-1.40459	-1.88669	-1.48209
94.4	3.39602	0.0107631	0.951399	0.665658	-0.142687	0.860186	0.548219	0.786757	0.0882336	0.376534	0.0739728	-0.258611	-0.118235	0.287571	0.367757	0.342836	-0.00115952	-0.291685	-0.600569	-1.38746	-1.89304	-1.47415
94.88	3.379	-0.00117716	0.96898	0.682268	-0.146587	0.892099	0.556049	0.784933	0.106122	0.375531	0.049966	-0.283583	-0.126282	0.253182	0.389299	0.340678	-0.00259195	-0.303232	-0.589738	-1.36176	-1.90722	-1.47911
95.36	3.37855	-0.0254688	0.971981	0.689343	-0.146181	0.919545	0.585977	0.786959	0.114313	0.376996	0.0409116	-0.290972	-0.129073	0.217008	0.413287	0.338387	-0.00995448	-0.315701	-0.583132	-1.33463	-1.92301	-1.49085
95.84	3.3965	-0.0513943	0.960397	0.684271	-0.147842	0.930308	0.625483	0.786537	0.111434	0.379857	0.0480054	-0.283238	-0.122698	0.192568	0.432044	0.337908	-0.0152839	-0.327394	-0.574043	-1.31128	-1.93323	-1.50177
96.32	3.4113	-0.077035	0.942817	0.665778	-0.158914	0.913251	0.670945	0.780677	0.101553	0.384375	0.0713601	-0.268758	-0.107796	0.184899	0.443196	0.336624	-0.0177458	-0.341048	-0.56028	-1.2936	-1.93817	-1.50653
96.8	3.3943	-0.10117	0.924865	0.638652	-0.178745	0.871566	0.714413	0.769527	0.0898758	0.394406	0.113556	-0.250621	-0.0884097	0.192393	0.446594	0.330708	-0.023416	-0.360031	-0.544692	-1.27448	-1.94254	-1.50381
97.28	3.32936	-0.129817	0.902861	0.610261	-0.199283	0.823252	0.74657	0.756037	0.0844065	0.410187	0.167224	-0.228974	-0.0712801	0.207155	0.444256	0.320259	-0.0349803	-0.386431	-0.532218	-1.24575	-1.94951	-1.49637
97.76	3.22845	-0.16203	0.869556	0.586247	-0.212056	0.793708	0.764864	0.743025	0.0892963	0.430098	0.218546	-0.200676	-0.0627385	0.224427	0.436954	0.307676	-0.0500175	-0.417416	-0.525889	-1.20488	-1.9556	-1.48579
98.24	3.12117	-0.19207	0.824001	0.573398	-0.215405	0.805089	0.775727	0.730993	0.104355	0.451435	0.248689	-0.162195	-0.0648266	0.240662	0.425842	0.298934	-0.0605101	-0.443672	-0.523466	-1.15557	-1.95222	-1.4729
98.72	3.03454	-0.215595	0.7646	0.57054	-0.213536	0.85549	0.790838	0.719326	0.123167	0.473598	0.244332	-0.11169	-0.0762806	0.252802	0.410231	0.299987	-0.0583902	-0.457856	-0.520689	-1.10476	-1.9369	-1.46005
99.2	2.97775	-0.231567	0.700298	0.571775	-0.213948	0.924224	0.820291	0.707119	0.142516	0.493105	0.207375	-0.0481023	-0.0941996	0.262566	0.39365	0.312497	-0.0435456	-0.455392	-0.513357	-1.05937	-1.90643	-1.44724
99.68	2.94532	-0.24949	0.639319	0.56339	-0.219007	0.982646	0.869656	0.693242	0.152982	0.503949	0.164281	0.0256365	-0.114455	0.272925	0.379935	0.335995	-0.0195471	-0.439468	-0.50186	-1.02173	-1.86775	-1.43911
100.16	2.92477	-0.281449	0.586025	0.543072	-0.22396	1.01164	0.930877	0.676538	0.151467	0.500704	0.139928	0.106637	-0.1324	0.288194	0.370363	0.365223	0.00563509	-0.420052	-0.487973	-0.991299	-1.83254	-1.43485
100.64	2.91817	-0.334215	0.532833	0.519927	-0.221321	1.00763	0.989583	0.655714	0.140404	0.480466	0.157496	0.19136	-0.14267	0.315962	0.363803	0.392096	0.0289524	-0.408445	-0.474716	-0.966709	-1.80708	-1.43171
101.12	2.93555	-0.401374	0.478586	0.505069	-0.207653	0.985348	1.03452	0.630961	0.127533	0.450147	0.208023	0.279451	-0.142206	0.360844	0.354068	0.409608	0.0495647	-0.412047	-0.461725	-0.947032	-1.79141	-1.42524
101.6	2.98163	-0.46687	0.422258	0.511507	-0.185765	0.957381	1.06196	0.603227	0.118233	0.420652	0.26688	0.370096	-0.132889	0.421614	0.338328	0.414075	0.0660903	-0.432222	-0.449113	-0.931029	-1.77935	-1.41431
102.08	3.04746	-0.516658	0.364228	0.541731	-0.163809	0.926053	1.0749	0.574864	0.111582	0.401561	0.307061	0.462732	-0.119427	0.491094	0.319339	0.410542	0.0773495	-0.464066	-0.434238	-0.917597	-1.76801	-1.40009
102.56	3.10493	-0.544698	0.309598	0.578125	-0.148133	0.883527	1.08483	0.548578	0.0991302	0.392577	0.313317	0.553351	-0.109095	0.553501	0.306496	0.410701	0.0817731	-0.499463	-0.417576	-0.904413	-1.76105	-1.3902
103.04	3.13072	-0.558112	0.259019	0.605568	-0.142927	0.825896	1.09803	0.52673	0.067691	0.38523	0.29023	0.633958	-0.105805	0.595087	0.307564	0.426205	0.080337	-0.531893	-0.400932	-0.889833	-1.76049	-1.38821
103.52	3.12116	-0.568798	0.210352	0.605106	-0.143707	0.753742	1.12132	0.509759	0.0120364	0.368125	0.261749	0.698632	-0.108495	0.61089	0.323037	0.460537	0.0783177	-0.558365	-0.387281	-0.872413	-1.77111	-1.39328
104	3.09086	-0.58203	0.159254	0.576054	-0.146886	0.673228	1.15202	0.497188	-0.0641322	0.336884	0.24364	0.746811	-0.112363	0.604101	0.347525	0.508017	0.0840618	-0.576707	-0.378263	-0.854284	-1.78638	-1.40046
104.48	3.05659	-0.594825	0.099998	0.525944	-0.146617	0.5964	1.18575	0.490149	-0.140835	0.2973	0.241384	0.781607	-0.110692	0.585554	0.371068	0.555875	0.101295	-0.590897	-0.374169	-0.835585	-1.79953	-1.4046
104.96	3.02546	-0.597016	0.0328833	0.468093	-0.143486	0.525708	1.2142	0.489805	-0.201092	0.257898	0.243969	0.80857	-0.100622	0.56501	0.386469	0.590964	0.129577	-0.604591	-0.373247	-0.813151	-1.80354	-1.39885
105.44	2.99605	-0.584852	-0.0421186	0.407074	-0.135851	0.45717	1.23236	0.49756	-0.236101	0.222852	0.243326	0.832177	-0.081606	0.550392	0.391031	0.607243	0.162672	-0.620647	-0.371764	-0.783733	-1.80308	-1.38501
105.92	2.96236	-0.56145	-0.119098	0.342004	-0.12508	0.38546	1.23751	0.513643	-0.246773	0.189454	0.236968	0.84911	-0.0559702	0.54154	0.388011	0.60894	0.195092	-0.640486	-0.365634	-0.744675	-1.80451	-1.3675
106.4	2.92863	-0.538902	-0.192963	0.269213	-0.109387	0.302698	1.2313	0.535054	-0.242207	0.151282	0.239553	0.857373	-0.0274686	0.53828	0.385126	0.602199	0.223894	-0.662273	-0.352735	-0.697438	-1.81713	-1.34941
106.88	2.90521	-0.525865	-0.256992	0.187032	-0.090509	0.211056	1.21782	0.557248	-0.230838	0.109257	0.263646	0.85823	0.000433395	0.538298	0.386459	0.588064	0.248634	-0.683509	-0.336093	-0.648276	-1.84146	-1.33472
107.36	2.90311	-0.518324	-0.303908	0.097061	-0.0688097	0.118148	1.20619	0.575633	-0.214936	0.0698886	0.307576	0.85931	0.0244705	0.538898	0.395434	0.565615	0.272198	-0.700852	-0.319356	-0.603044	-1.86808	-1.32382
107.84	2.91365	-0.50517	-0.334345	0.00507777	-0.0457876	0.0384671	1.20105	0.587265	-0.189252	0.0446028	0.35889	0.867415	0.0405714	0.537288	0.411696	0.534697	0.293117	-0.710738	-0.305037	-0.563438	-1.88404	-1.31529
108.32	2.92205	-0.474048	-0.354874	-0.0886048	-0.0290724	-0.0130093	1.20337	0.591197	-0.151324	0.0343876	0.39644	0.881292	0.0475564	0.530468	0.430844	0.498465	0.30973	-0.712573	-0.294596	-0.527551	-1.88117	-1.30799
108.8	2.91172	-0.419438	-0.374086	-0.183041	-0.0226387	-0.0317575	1.20936	0.589009	-0.100437	0.030823	0.407479	0.890264	0.0484587	0.516055	0.44855	0.470902	0.31908	-0.707168	-0.283987	-0.493213	-1.85877	-1.30124
109.28	2.87688	-0.350666	-0.397192	-0.279824	-0.0288156	-0.0276407	1.21295	0.582188	-0.0387827	0.0188697	0.399885	0.879535	0.050263	0.495432	0.46119	0.463663	0.318107	-0.696526	-0.268568	-0.460938	-1.82687	-1.29432
109.76	2.82129	-0.279408	-0.42525	-0.377548	-0.049217	-0.0262025	1.21337	0.573089	0.0248428	-0.0126114	0.390868	0.842623	0.0590298	0.472485	0.467108	0.483783	0.30832	-0.683242	-0.248875	-0.432048	-1.79703	-1.28397
110.24	2.75676	-0.215288	-0.451334	-0.467713	-0.0785416	-0.0547286	1.20919	0.564859	0.0813718	-0.0632416	0.395863	0.786153	0.0752836	0.453485	0.463559	0.526198	0.290003	-0.668133	-0.228271	-0.410732	-1.77511	-1.27065
110.72	2.68598	-0.158669	-0.469489	-0.539067	-0.111334	-0.12585	1.20321	0.558826	0.124746	-0.1196	0.414007	0.727889	0.0950902	0.443603	0.450701	0.578324	0.265685	-0.650298	-0.214857	-0.396346	-1.75818	-1.25622
111.2	2.60692	-0.1056	-0.47707	-0.587147	-0.143797	-0.229034	1.19796	0.555627	0.150924	-0.166618	0.431501	0.684862	0.111318	0.446399	0.42889	0.627133	0.238791	-0.625661	-0.214597	-0.385407	-1.73622	-1.24326
111.68	2.52311	-0.0544104	-0.477916	-0.616377	-0.173557	-0.335385	1.18992	0.553056	0.162789	-0.192967	0.429138	0.663282	0.118495	0.461706	0.400063	0.663461	0.214321	-0.590818	-0.226954	-0.373588	-1.70091	-1.23658
112.16	2.43713	-0.01041	-0.481813	-0.643812	-0.201883	-0.422319	1.17997	0.547911	0.169412	-0.195813	0.401503	0.656426	0.118574	0.486696	0.366881	0.686799	0.197989	-0.546442	-0.246763	-0.358006	-1.6489	-1.23553
112.64	2.35987	0.0211911	-0.497	-0.684472	-0.229957	-0.482947	1.16846	0.539897	0.184739	-0.177984	0.350804	0.653099	0.11644	0.51497	0.334272	0.699647	0.191015	-0.497076	-0.265757	-0.341269	-1.58318	-1.23745
113.12	2.29447	0.0388274	-0.519215	-0.747026	-0.258391	-0.528513	1.15915	0.53177	0.219556	-0.144194	0.286086	0.646338	0.116455	0.536639	0.306433	0.70237	0.189128	-0.451319	-0.276961	-0.328201	-1.51641	-1.2391
113.6	2.24404	0.0467431	-0.541842	-0.824589	-0.286628	-0.573955	1.15349	0.528589	0.277462	-0.0964619	0.212437	0.63253	0.120043	0.54347	0.286595	0.700106	0.186016	-0.41776	-0.27879	-0.318337	-1.45709	-1.23773
114.08	2.21044	0.0509146	-0.553013	-0.906375	-0.312523	-0.624215	1.15325	0.536364	0.348382	-0.041134	0.123433	0.61197	0.124966	0.531498	0.273668	0.697183	0.174175	-0.400926	-0.272681	-0.306831	-1.41109	-1.23626
114.56	2.19522	0.0564231	-0.547454	-0.980337	-0.336102	-0.667535	1.15489	0.556695	0.41898	0.018853	0.0155094	0.585119	0.127636	0.50525	0.266375	0.702625	0.153608	-0.399212	-0.261383	-0.286238	-1.37927	-1.2373
115.04	2.21081	0.0633354	-0.533035	-1.03879	-0.358115	-0.686407	1.15578	0.58277	0.473259	0.0778919	-0.113766	0.54922	0.126363	0.479101	0.258583	0.722418	0.130406	-0.407769	-0.24706	-0.254409	-1.35614	-1.24179
115.52	2.26019	0.0671348	-0.521036	-1.08436	-0.384462	-0.672121	1.15684	0.605201	0.50209	0.129972	-0.250033	0.507195	0.12257	0.465736	0.246157	0.759701	0.112598	-0.42058	-0.232227	-0.215646	-1.33977	-1.24596
116	2.32644	0.0656173	-0.517809	-1.1169	-0.415233	-0.633341	1.16112	0.614762	0.503172	0.171903	-0.371961	0.464992	0.117989	0.469221	0.224039	0.811512	0.109511	-0.434016	-0.219612	-0.181478	-1.32946	-1.24574
116.48	2.38413	0.0592438	-0.524596	-1.13789	-0.448298	-0.585892	1.17257	0.608045	0.47356	0.198613	-0.45994	0.434206	0.115129	0.481429	0.190532	0.865964	0.122953	-0.447039	-0.209726	-0.159987	-1.3266	-1.24035
116.96	2.40682	0.0538475	-0.532865	-1.15027	-0.47829	-0.545535	1.19254	0.588217	0.411948	0.205438	-0.501189	0.423592	0.11324	0.486955	0.147422	0.913698	0.147943	-0.460114	-0.203644	-0.155846	-1.32907	-1.23247
117.44	2.38883	0.0535135	-0.530118	-1.15873	-0.501156	-0.522456	1.21892	0.562771	0.324873	0.189935	-0.495574	0.429643	0.110793	0.472694	0.0993151	0.94882	0.178327	-0.472671	-0.19932	-0.162845	-1.33214	-1.22719
117.92	2.34525	0.0633226	-0.512098	-1.16665	-0.516305	-0.515694	1.24794	0.539656	0.224693	0.156049	-0.457625	0.443275	0.108065	0.438178	0.0516827	0.972665	0.206857	-0.48325	-0.194093	-0.172166	-1.33206	-1.2244
118.4	2.30394	0.0867697	-0.486335	-1.174	-0.527907	-0.526905	1.2754	0.523345	0.130729	0.109265	-0.410219	0.4517	0.103915	0.397454	0.0126862	0.99195	0.232009	-0.488681	-0.184783	-0.178085	-1.32657	-1.22345
118.88	2.27749	0.124257	-0.467404	-1.17507	-0.543145	-0.555627	1.29993	0.51546	0.0598746	0.0604914	-0.375241	0.452139	0.0991096	0.366214	-0.0151817	1.01138	0.254301	-0.487054	-0.172862	-0.181351	-1.31882	-1.22091
119.36	2.26532	0.174196	-0.467067	-1.16344	-0.564681	-0.593835	1.32192	0.514339	0.0174223	0.0199118	-0.368313	0.447761	0.0936933	0.353023	-0.0305195	1.03402	0.275135	-0.477769	-0.163167	-0.185332	-1.31447	-1.21715
119.84	2.25123	0.227217	-0.484746	-1.13712	-0.591742	-0.620824	1.33985	0.517338	0.00135537	-0.00784846	-0.386958	0.447102	0.0864981	0.354301	-0.0397263	1.05441	0.295386	-0.459767	-0.159647	-0.194095	-1.31983	-1.21849
120.32	2.22271	0.268645	-0.509841	-1.09866	-0.616551	-0.610541	1.34726	0.521349	-0.00272405	-0.0221098	-0.415689	0.454302	0.0771264	0.360521	-0.0477761	1.06499	0.314302	-0.433132	-0.163988	-0.207045	-1.33254	-1.23149
120.8	2.18135	0.290011	-0.531957	-1.06235	-0.628458	-0.551567	1.34105	0.525274	-0.0103021	-0.0255237	-0.44118	0.467084	0.0652698	0.361068	-0.0580104	1.05993	0.326446	-0.399673	-0.172951	-0.21962	-1.34869	-1.25746
121.28	2.13644	0.285649	-0.545466	-1.04448	-0.621212	-0.45777	1.32267	0.528333	-0.0339926	-0.0199108	-0.446883	0.480813	0.0520139	0.353986	-0.0704006	1.04124	0.330146	-0.362846	-0.181483	-0.224788	-1.35952	-1.28836
121.76	2.08458	0.265079	-0.555619	-1.05436	-0.597671	-0.372112	1.29791	0.531297	-0.0780079	-0.0151271	-0.435194	0.491343	0.0399574	0.34321	-0.083428	1.0199	0.323932	-0.328011	-0.185972	-0.219225	-1.36375	-1.31352
122.24	2.01807	0.243533	-0.569978	-1.08557	-0.570444	-0.338195	1.27544	0.534158	-0.142565	-0.0149522	-0.416381	0.500598	0.0335772	0.334712	-0.0957048	1.00721	0.310682	-0.300073	-0.188256	-0.202988	-1.36169	-1.3282
122.72	1.92694	0.23223	-0.595091	-1.12023	-0.554324	-0.37385	1.25719	0.535469	-0.215532	-0.0237548	-0.401202	0.512631	0.0344805	0.330135	-0.109575	1.00898	0.296341	-0.281699	-0.192932	-0.181334	-1.3594	-1.33675
123.2	1.81569	0.235845	-0.625501	-1.13821	-0.558298	-0.456654	1.23845	0.533343	-0.279142	-0.0413302	-0.398897	0.527664	0.0408383	0.328449	-0.126779	1.01954	0.287558	-0.272747	-0.203721	-0.161791	-1.35798	-1.34759
123.68	1.7109	0.249722	-0.652739	-1.12784	-0.581997	-0.536645	1.21362	0.525647	-0.305961	-0.0647532	-0.401446	0.544182	0.0480652	0.326476	-0.146535	1.0302	0.28794	-0.270475	-0.222107	-0.148504	-1.35889	-1.36386
124.16	1.64514	0.267107	-0.667803	-1.08983	-0.613896	-0.569297	1.17692	0.512727	-0.273912	-0.0934317	-0.397799	0.555448	0.0516582	0.321345	-0.160755	1.03337	0.294675	-0.271458	-0.241935	-0.141243	-1.35949	-1.38183
124.64	1.63106	0.283815	-0.667856	-1.03541	-0.641885	-0.545384	1.13384	0.49722	-0.178389	-0.124008	-0.377264	0.556127	0.0512223	0.311419	-0.161421	1.02646	0.301928	-0.273449	-0.25798	-0.133136	-1.35649	-1.39149
125.12	1.65146	0.301883	-0.656228	-0.981096	-0.65916	-0.494665	1.09407	0.482234	-0.0424631	-0.159493	-0.340725	0.545491	0.0511597	0.293824	-0.141336	1.02089	0.30357	-0.275003	-0.266885	-0.117565	-1.34993	-1.38418
125.6	1.67403	0.324549	-0.639497	-0.941537	-0.66599	-0.464085	1.06726	0.46928	0.0940591	-0.198438	-0.293837	0.529382	0.0573345	0.264505	-0.10555	1.01967	0.296834	-0.27383	-0.270767	-0.0911975	-1.33967	-1.36208
126.08	1.66916	0.350678	-0.620573	-0.924967	-0.670546	-0.485613	1.05806	0.457794	0.196814	-0.237825	-0.250818	0.512689	0.0730311	0.221487	-0.0630902	1.02232	0.281934	-0.270436	-0.273895	-0.0565506	-1.32719	-1.33269
126.56	1.638	0.379632	-0.60227	-0.929041	-0.682824	-0.551814	1.06095	0.443735	0.253971	-0.31479	-0.219268	0.496912	0.0951228	0.164665	-0.0230473	1.01971	0.262382	-0.263607	-0.281146	-0.0216161	-1.31584	-1.30701
127.04	1.60018	0.409045	-0.585471	-0.950086	-0.70592	-0.63063	1.07284	0.424309	0.278235	-0.330191	-0.20225	0.481754	0.116128	0.103353	0.00890768	0.999708	0.240347	-0.252769	-0.292605	0.00783579	-1.30451	-1.28776
127.52	1.57601	0.439097	-0.569379	-0.985529	-0.738456	-0.695232	1.09143	0.400073	0.294026	-0.319704	-0.194928	0.466982	0.130018	0.0470644	0.0314641	0.961207	0.216182	-0.24132	-0.306909	0.0311947	-1.29317	-1.27102
128	1.57473	0.468061	-0.549134	-1.01914	-0.774383	-0.73723	1.1182	0.374838	0.322021	-0.280945	-0.199172	0.450611	0.134718	0.00602863	0.0527063	0.912657	0.192796	-0.23164	-0.320378	0.0519313	-1.28431	-1.25056
128.48	1.58515	0.496266	-0.521372	-1.04891	-0.808255	-0.777889	1.15844	0.354604	0.361021	-0.218084	-0.218387	0.433923	0.132769	-0.0164367	0.0755506	0.865592	0.172458	-0.226738	-0.330356	0.0777333	-1.28136	-1.22435
128.96	1.58983	0.522007	-0.482275	-1.07204	-0.836207	-0.840449	1.2085	0.344633	0.390527	-0.139156	-0.258281	0.416497	0.128243	-0.0231708	0.0981862	0.826222	0.159543	-0.226826	-0.337608	0.109961	-1.28833	-1.1978
129.44	1.58032	0.542691	-0.441855	-1.08976	-0.856176	-0.932458	1.25896	0.346153	0.39492	-0.0504021	-0.325235	0.397038	0.120094	-0.0214032	0.114226	0.796544	0.153372	-0.229528	-0.342694	0.142856	-1.30165	-1.17934
129.92	1.55586	0.559513	-0.404888	-1.11153	-0.869713	-1.03918	1.29935	0.356857	0.371609	0.0371597	-0.409171	0.374483	0.103813	-0.0206013	0.117416	0.771694	0.153179	-0.231177	-0.347677	0.169448	-1.31887	-1.17298
130.4	1.51723	0.575028	-0.383024	-1.13843	-0.877928	-1.13566	1.31791	0.371275	0.341171	0.117193	-0.494633	0.34798	0.0746955	-0.0252302	0.104088	0.748795	0.155039	-0.227495	-0.352844	0.184713	-1.33304	-1.17851
130.88	1.45674	0.593287	-0.379538	-1.15757	-0.882511	-1.21092	1.25595	0.383838	0.330937	0.182152	-0.562725	0.321937	0.036334	-0.0360656	0.0780722	0.728304	0.157711	-0.219077	-0.356596	0.190177	-1.33796	-1.18634
131.36	1.37139	0.613881	-0.38409	-1.16126	-0.888111	-1.27399	1.2287	0.391621	0.357342	0.23254	-0.603156	0.298716	-0.00260442	-0.048431	0.0451235	0.710707	0.162782	-0.208116	-0.354223	0.190849	-1.32989	-1.1896
131.84	1.27791	0.629318	-0.380397	-1.13932	-0.897098	-1.34576	1.19731	0.396008	0.415377	0.269927	-0.619449	0.277565	-0.0307929	-0.0575508	0.0132899	0.696108	0.172044	-0.197251	-0.344094	0.191312	-1.31594	-1.18398
132.32	1.21013	0.633362	-0.361224	-1.09451	-0.912326	-1.43187	1.17207	0.398656	0.486144	0.301624	-0.61621	0.254884	-0.0414691	-0.0609794	-0.0147915	0.677461	0.185003	-0.189008	-0.322516	0.196413	-1.30348	-1.17131
132.8	1.20762	0.620036	-0.330813	-1.04305	-0.932017	-1.51862	1.15713	0.403626	0.553431	0.330121	-0.598911	0.222183	-0.0359656	-0.0589493	-0.0380941	0.651724	0.194826	-0.18368	-0.293679	0.207279	-1.30045	-1.15552
133.28	1.29246	0.594349	-0.302871	-1.00548	-0.952017	-1.57473	1.14576	0.411266	0.609436	0.357107	-0.561397	0.176859	-0.0220764	-0.0580545	-0.0602639	0.619771	0.195946	-0.178557	-0.262841	0.223388	-1.30873	-1.13974
133.76	1.43784	0.565109	-0.288197	-0.994988	-0.964971	-1.5831	1.12778	0.420338	0.659558	0.378504	-0.49838	0.119137	-0.0080381	-0.0645724	-0.0817411	0.587402	0.187556	-0.171884	-0.235965	0.245425	-1.32517	-1.12489
134.24	1.59345	0.546146	-0.289509	-1.01227	-0.967801	-1.55101	1.09864	0.428095	0.714186	0.386276	-0.409988	0.055807	0.00209166	-0.0818336	-0.102072	0.560363	0.175523	-0.162665	-0.216706	0.275359	-1.34311	-1.1108
134.72	1.70219	0.542447	-0.298481	-1.04596	-0.96097	-1.5058	1.05884	0.43212	0.774523	0.375731	-0.318099	-0.00184013	0.0102058	-0.110246	-0.120483	0.539139	0.167261	-0.153019	-0.204312	0.312164	-1.35704	-1.09696
135.2	1.73613	0.553643	-0.304988	-1.0833	-0.952772	-1.47777	1.01921	0.432094	0.837992	0.345024	-0.249708	-0.0457486	0.0197016	-0.144321	-0.132355	0.517714	0.166309	-0.146407	-0.194058	0.350323	-1.36804	-1.08497
135.68	1.71191	0.573036	-0.302078	-1.11233	-0.950078	-1.47558	0.99053	0.429169	0.898634	0.300853	-0.228179	-0.0738065	0.032271	-0.175625	-0.133342	0.494147	0.169926	-0.146315	-0.180785	0.383502	-1.37677	-1.07787
136.16	1.66438	0.590225	-0.290914	-1.12967	-0.957542	-1.48828	0.981819	0.426011	0.956439	0.254106	-0.253593	-0.0904394	0.0469929	-0.196795	-0.119219	0.468461	0.171437	-0.15293	-0.164339	0.407416	-1.38257	-1.07602
136.64	1.62589	0.601097	-0.279905	-1.12904	-0.971426	-1.50274	0.988508	0.422861	1.01433	0.217432	-0.307024	-0.0985702	0.0592898	-0.203012	-0.0917445	0.445403	0.166941	-0.164959	-0.145815	0.423353	-1.38492	-1.0776
137.12	1.6036	0.609589	-0.273045	-1.10962	-0.985036	-1.51486	0.99732	0.419351	1.0772	0.193598	-0.362966	-0.0998377	0.0682435	-0.195079	-0.0587738	0.42664	0.159697	-0.179858	-0.129758	0.434127	-1.37991	-1.0798
137.6	1.58468	0.624555	-0.269265	-1.07205	-0.988365	-1.53287	0.990456	0.413143	1.1399	0.180713	-0.407296	-0.0902436	0.07506	-0.177892	-0.0305027	0.41118	0.157509	-0.194431	-0.118782	0.444008	-1.36779	-1.07892
138.08	1.55763	0.650304	-0.261831	-1.01963	-0.977289	-1.56467	0.956313	0.402227	1.19126	0.169765	-0.439002	-0.0677037	0.0829282	-0.157131	-0.0116171	0.394109	0.167342	-0.207866	-0.113621	0.452772	-1.35139	-1.07356
138.56	1.52862	0.688866	-0.247976	-0.962975	-0.954385	-1.60023	0.896475	0.386206	1.22157	0.155241	-0.468817	-0.0324775	0.0959377	-0.138745	-0.00248821	0.373915	0.188855	-0.219742	-0.113777	0.455469	-1.33802	-1.06396
139.04	1.5138	0.7349	-0.226287	-0.912885	-0.92943	-1.6197	0.82278	0.365744	1.23525	0.140004	-0.504414	0.0102459	0.11374	-0.125608	0.00216548	0.353981	0.216124	-0.227331	-0.116857	0.449412	-1.33629	-1.0532
139.52	1.52526	0.774997	-0.201169	-0.87201	-0.910498	-1.60253	0.755111	0.341205	1.24429	0.136013	-0.540483	0.0504079	0.135311	-0.120239	0.00843972	0.341618	0.239933	-0.227434	-0.121529	0.477337	-1.34829	-1.04079
140	1.55828	0.800069	-0.173595	-0.838757	-0.901111	-1.5452	0.708339	0.313021	1.26418	0.155429	-0.5602	0.0814166	0.156897	-0.122805	0.0177697	0.343296	0.254288	-0.218103	-0.125591	0.457452	-1.37546	-1.0257
140.48	1.58851	0.802015	-0.148753	-0.814865	-0.897849	-1.46246	0.687637	0.279348	1.29978	0.204669	-0.553145	0.101994	0.177728	-0.129789	0.0273888	0.358223	0.255668	-0.201641	-0.128002	0.439663	-1.41129	-1.00567
140.96	1.59355	0.78284	-0.130078	-0.800206	-0.897801	-1.37269	0.686227	0.240437	1.34299	0.277953	-0.515321	0.114746	0.198249	-0.136589	0.0298482	0.378196	0.245599	-0.18361	-0.127124	0.428303	-1.44618	-0.980159
141.44	1.56582	0.750022	-0.121085	-0.794638	-0.895712	-1.28666	0.694833	0.197828	1.37736	0.357785	-0.462291	0.121418	0.219946	-0.135627	0.0248322	0.396223	0.227403	-0.171162	-0.120553	0.424771	-1.47279	-0.948578
141.92	1.51901	0.712017	-0.122648	-0.795989	-0.892537	-1.19742	0.702011	0.15577	1.38895	0.4234	-0.409239	0.119293	0.244124	-0.123595	0.0177022	0.408608	0.205168	-0.168202	-0.108189	0.427084	-1.48947	-0.914393
142.4	1.48072	0.677156	-0.133725	-0.795153	-0.892691	-1.08789	0.706094	0.118527	1.37663	0.46261	-0.368363	0.10278	0.270234	-0.103137	0.0160407	0.418876	0.184408	-0.172881	-0.089906	0.431998	-1.49552	-0.880271
142.88	1.46999	0.653425	-0.144623	-0.779378	-0.896728	-0.946489	0.712743	0.0882422	1.34691	0.474173	-0.339902	0.0731286	0.296684	-0.0818816	0.0230344	0.432117	0.16862	-0.180009	-0.0681627	0.438676	-1.49869	-0.849335
143.36	1.48611	0.64392	-0.148153	-0.741282	-0.906462	-0.773779	0.724343	0.0636443	1.3074	0.468986	-0.312216	0.0407765	0.322358	-0.0700265	0.0353612	0.453708	0.157444	-0.181065	-0.0449748	0.44568	-1.50272	-0.823061
143.84	1.51633	0.646132	-0.137946	-0.685858	-0.917603	-0.585397	0.738788	0.0413687	1.27063	0.462026	-0.279702	0.0183264	0.348782	-0.0724266	0.0404408	0.482566	0.147067	-0.173187	-0.0233677	0.451161	-1.50522	-0.803138
144.32	1.54238	0.655581	-0.119805	-0.633767	-0.928194	-0.405627	0.748127	0.019523	1.23678	0.464654	-0.23945	0.0142003	0.375272	-0.0848915	0.0343762	0.511208	0.133952	-0.155246	-0.0059017	0.45372	-1.49995	-0.788881
144.8	1.55673	0.663976	-0.103644	-0.605084	-0.935977	-0.268695	0.743564	-0.00262463	1.19887	0.478457	-0.199043	0.0235804	0.401875	-0.0930306	0.0200192	0.535918	0.119345	-0.130307	0.00587098	0.453603	-1.48232	-0.781514
145.28	1.56224	0.660246	-0.100259	-0.606604	-0.941221	-0.196965	0.722291	-0.0239308	1.15017	0.494223	-0.162926	0.0277033	0.429323	-0.0841456	0.00941787	0.555187	0.108585	-0.100046	0.0120523	0.453784	-1.4563	-0.779181
145.76	1.57082	0.643292	-0.113777	-0.629887	-0.944591	-0.192546	0.68897	-0.0427435	1.08898	0.502065	-0.131754	0.0112111	0.457106	-0.0543352	0.0167131	0.571214	0.108659	-0.0666424	0.0136473	0.456739	-1.43423	-0.780144
146.24	1.59474	0.618908	-0.139615	-0.651487	-0.944818	-0.233469	0.65354	-0.0595171	1.01936	0.495805	-0.0961887	-0.0269077	0.484314	-0.00857228	0.0409585	0.585328	0.120089	-0.0307404	0.0142153	0.463138	-1.42671	-0.783687
146.72	1.63594	0.594549	-0.172792	-0.648193	-0.941728	-0.27398	0.620887	-0.0747288	0.948624	0.477654	-0.0494696	-0.0741676	0.509024	0.0375336	0.074067	0.596466	0.13468	0.0035019	0.0183611	0.471451	-1.43746	-0.790086
147.2	1.68634	0.576393	-0.203957	-0.610818	-0.93294	-0.27343	0.589732	-0.0876299	0.887569	0.45811	0.00767575	-0.11003	0.529734	0.0693879	0.10014	0.601837	0.14355	0.0328071	0.0285541	0.477067	-1.45954	-0.800125
147.68	1.72994	0.563813	-0.233566	-0.545511	-0.916574	-0.215082	0.557308	-0.0957038	0.838976	0.45103	0.0691056	-0.123092	0.546411	0.0791005	0.109921	0.60186	0.140873	0.0540267	0.045442	0.480082	-1.47653	-0.814109
148.16	1.74636	0.548763	-0.262234	-0.462947	-0.891186	-0.114954	0.521826	-0.096809	0.80544	0.464081	0.126245	-0.119321	0.561664	0.0662654	0.105799	0.598371	0.131793	0.0680828	0.0680031	0.483055	-1.47638	-0.827176
148.64	1.72284	0.529111	-0.288295	-0.379802	-0.856425	-0.00374259	0.486762	-0.0911503	0.783832	0.496521	0.176492	-0.11307	0.579832	0.0423947	0.0991533	0.59706	0.126789	0.0775936	0.0926715	0.490421	-1.45838	-0.832106
149.12	1.66394	0.503862	-0.309862	-0.307961	-0.813954	0.0952941	0.459277	-0.0820136	0.772507	0.539354	0.222309	-0.119828	0.606361	0.0196729	0.0999821	0.59831	0.133287	0.0889732	0.117501	0.511325	-1.42923	-0.821484
149.6	1.59177	0.477471	-0.319006	-0.252694	-0.766581	0.182505	0.446549	-0.074563	0.76906	0.579641	0.274806	-0.141486	0.641181	0.00652059	0.10704	0.599433	0.149227	0.089668	0.143326	0.527276	-1.40187	-0.794212
150.08	1.54174	0.451831	-0.310706	-0.216462	-0.717839	0.276573	0.450231	-0.0729561	0.774189	0.608497	0.331166	-0.169291	0.679569	-0.000816794	0.115263	0.592582	0.163969	0.0857151	0.170507	0.541394	-1.38561	-0.755731
150.56	1.54364	0.423167	-0.284015	-0.197698	-0.671355	0.384053	0.465277	-0.077414	0.787829	0.623867	0.382567	-0.189349	0.711843	-0.0195448	0.11741	0.570805	0.1699	0.0763167	0.200222	0.548411	-1.37771	-0.717036
151.04	1.61041	0.384522	-0.241882	-0.192734	-0.632955	0.487771	0.485419	-0.0841411	0.806099	0.63199	0.409002	-0.189974	0.730533	-0.0704424	0.116901	0.535263	0.168394	0.0621105	0.229547	0.546793	-1.37552	-0.688715
151.52	1.72734	0.326941	-0.190344	-0.196423	-0.603454	0.556276	0.507605	-0.0877998	0.824236	0.647289	0.394396	-0.170711	0.734282	-0.160893	0.122099	0.494557	0.170039	0.0465149	0.253746	0.540785	-1.37489	-0.6747
152	1.86716	0.2543	-0.132436	-0.201406	-0.584292	0.574193	0.529873	-0.084987	0.841201	0.681621	0.340699	-0.136256	0.729515	-0.276327	0.144101	0.463912	0.184093	0.0333079	0.268096	0.535966	-1.36991	-0.670557
152.48	2.00112	0.175943	-0.0721003	-0.196076	-0.572535	0.559588	0.551933	-0.0738996	0.855729	0.741995	0.263105	-0.0980301	0.723978	-0.379594	0.182054	0.453896	0.20935	0.026006	0.271161	0.53518	-1.35834	-0.667701
152.96	2.10801	0.107679	-0.00955047	-0.172807	-0.56593	0.550899	0.572423	-0.0567475	0.869029	0.821156	0.186388	-0.0648285	0.722781	-0.432129	0.223541	0.463437	0.232873	0.0241805	0.266833	0.534795	-1.34107	-0.66258
153.44	2.17896	0.0594786	0.0577034	-0.133627	-0.558199	0.585815	0.586429	-0.0361706	0.882772	0.901517	0.127474	-0.0448226	0.727258	-0.415714	0.254682	0.48283	0.240175	0.0260634	0.262511	0.53063	-1.31851	-0.653726
153.92	2.20982	0.0329187	0.133425	-0.087395	-0.546187	0.664199	0.591576	-0.0163834	0.89714	0.959726	0.0939233	-0.0423318	0.73454	-0.345467	0.266237	0.500293	0.225092	0.0283308	0.26109	0.522597	-1.29814	-0.645966
154.4	2.201	0.0229143	0.219866	-0.0439952	-0.527152	0.758872	0.588031	4.57257e-05	0.907195	0.983049	0.0823296	-0.053297	0.7426	-0.262942	0.261257	0.506979	0.192549	0.0287602	0.2627	0.514662	-1.28693	-0.640488
154.88	2.15686	0.0247478	0.315396	-0.0103878	-0.499522	0.838636	0.576286	0.0111864	0.912272	0.970435	0.0903388	-0.0714742	0.751527	-0.208888	0.249519	0.501972	0.154165	0.0255241	0.263587	0.513508	-1.28645	-0.637097
155.36	2.09587	0.0282482	0.40917	0.0161581	-0.462254	0.900147	0.563205	0.0174544	0.911911	0.935419	0.109521	-0.0910557	0.761746	-0.198701	0.241676	0.488778	0.117349	0.0184846	0.259662	0.523911	-1.29218	-0.631517
155.84	2.04571	0.0314576	0.485922	0.0501347	-0.41675	0.969631	0.55074	0.0206828	0.904417	0.896739	0.136899	-0.11175	0.77077	-0.217925	0.241463	0.467784	0.0827289	0.00902526	0.251399	0.507865	-1.2956	-0.619876
156.32	2.03242	0.0338532	0.534252	0.105667	-0.366569	1.07741	0.542833	0.0243842	0.892488	0.862739	0.164283	-0.139445	0.773785	-0.234868	0.24007	0.438802	0.0461614	-0.00124295	0.243141	0.524107	-1.29031	-0.603651
156.8	2.06639	0.031863	0.547291	0.181539	-0.315461	1.21865	0.538897	0.0302106	0.874815	0.8345	0.179327	-0.180803	0.76649	-0.227708	0.228765	0.39714	0.00572413	-0.0104003	0.238429	0.529653	-1.27405	-0.590222
157.28	2.13268	0.0247001	0.532018	0.262475	-0.267191	1.35059	0.535325	0.0394475	0.852861	0.806008	0.176625	-0.234953	0.747	-0.19578	0.203014	0.345131	-0.0349162	-0.014972	0.235763	0.52319	-1.25265	-0.58515
157.76	2.20226	0.0134803	0.497986	0.333406	-0.225004	1.41443	0.530062	0.0506924	0.829402	0.772704	0.157416	-0.291917	0.719678	-0.160601	0.168294	0.288927	-0.0684405	-0.013092	0.230669	0.512138	-1.23322	-0.590131
158.24	2.25167	-0.00027667	0.454663	0.385581	-0.189338	1.38556	0.5186	0.0609043	0.806651	0.736843	0.130168	-0.336694	0.690898	-0.145475	0.136772	0.240073	-0.0902744	-0.00359602	0.218566	0.50671	-1.21633	-0.599371
158.72	2.27478	-0.0132949	0.408579	0.425176	-0.157394	1.28608	0.497953	0.06716	0.786732	0.703897	0.106653	-0.360835	0.66497	-0.158901	0.117402	0.208414	-0.102193	0.0122037	0.201188	0.513563	-1.19635	-0.60345
159.2	2.28416	-0.0243494	0.357423	0.46607	-0.12475	1.16279	0.469028	0.0684071	0.770746	0.676473	0.0980603	-0.366879	0.64177	-0.189404	0.112861	0.196102	-0.109758	0.0309262	0.184745	0.528309	-1.16927	-0.595608
159.68	2.30542	-0.0309195	0.300909	0.522411	-0.0915202	1.0598	0.438173	0.065321	0.756795	0.652877	0.111023	-0.366712	0.620251	-0.215939	0.117629	0.197707	-0.11399	0.0483995	0.174933	0.541468	-1.13277	-0.573366
160.16	2.34848	-0.0345318	0.242235	0.593495	-0.0612212	0.984639	0.414997	0.0625737	0.746652	0.629462	0.144997	-0.371239	0.597734	-0.222025	0.121226	0.202348	-0.109331	0.0622544	0.174491	0.543872	-1.09743	-0.540967
160.64	2.40532	-0.0349922	0.190638	0.664538	-0.040437	0.926577	0.405798	0.0647512	0.739274	0.602551	0.199904	-0.378538	0.575396	-0.207607	0.116914	0.199122	-0.086936	0.0745887	0.179563	0.532931	-1.06859	-0.50698
161.12	2.45237	-0.0346613	0.151498	0.722431	-0.0324747	0.873906	0.409114	0.0746261	0.730218	0.573727	0.273042	-0.374443	0.557285	-0.182492	0.100115	0.188773	-0.0408947	0.0887137	0.18344	0.517637	-1.052	-0.477893
161.6	2.46558	-0.0353695	0.127034	0.759213	-0.0364459	0.835508	0.41863	0.0900072	0.717594	0.548525	0.357692	-0.347574	0.545803	-0.159257	0.0701343	0.174979	0.026239	0.107852	0.185696	0.508491	-1.04359	-0.456433
162.08	2.43159	-0.0357758	0.111509	0.778417	-0.0461091	0.830407	0.423239	0.104751	0.702074	0.529024	0.442265	-0.296812	0.539722	-0.144284	0.0293284	0.165347	0.102734	0.131314	0.18981	0.513912	-1.03358	-0.438795
162.56	2.35235	-0.030939	0.0975555	0.790214	-0.0528589	0.874832	0.419804	0.112538	0.682793	0.516738	0.51335	-0.236277	0.535804	-0.134665	-0.0187374	0.162364	0.173996	0.153496	0.200565	0.531298	-1.01445	-0.419853
163.04	2.24701	-0.0154095	0.0775057	0.799167	-0.0494799	0.956224	0.411848	0.110638	0.663899	0.51118	0.56239	-0.185573	0.528655	-0.12675	-0.0679254	0.166474	0.23091	0.167385	0.219716	0.550655	-0.987628	-0.395082
163.52	2.13468	0.0150441	0.053331	0.805634	-0.0359445	1.04897	0.406718	0.101863	0.645963	0.514613	0.592597	-0.154935	0.517945	-0.118087	-0.110497	0.173283	0.270471	0.168128	0.241692	0.561987	-0.963611	-0.364884
164	2.02839	0.0598442	0.030765	0.807406	-0.0151533	1.1311	0.410741	0.0920641	0.636271	0.528682	0.610956	-0.137294	0.504733	-0.107941	-0.144417	0.180462	0.294603	0.158168	0.258162	0.561043	-0.950017	-0.332562
164.48	1.93565	0.112106	0.01698	0.8047	0.00637699	1.2073	0.423019	0.0854223	0.630163	0.553614	0.626191	-0.116579	0.494586	-0.0964567	-0.171029	0.187742	0.306334	0.146068	0.264065	0.549073	-0.949917	-0.303888
164.96	1.86162	0.162192	0.0144768	0.805454	0.0236255	1.29408	0.43745	0.0809666	0.626202	0.585481	0.638506	-0.0764097	0.491563	-0.0838162	-0.198001	0.194156	0.307937	0.139871	0.25974	0.532966	-0.961343	-0.281763
165.44	1.80853	0.208646	0.018751	0.819071	0.0310622	1.42135	0.446783	0.0754555	0.62347	0.617052	0.64377	-0.0187525	0.497238	-0.0676029	-0.234595	0.199437	0.300303	0.145153	0.250867	0.520816	-0.979377	-0.267061
165.92	1.78186	0.258128	0.0245939	0.845426	0.0295239	1.59401	0.446862	0.0663948	0.619328	0.636925	0.638098	0.0445365	0.511364	-0.0489202	-0.284202	0.197818	0.286317	0.158029	0.242367	0.513709	-0.995974	-0.255024
166.4	1.78668	0.318662	0.0260358	0.87881	0.0199913	1.80376	0.436274	0.0551674	0.612628	0.640175	0.627224	0.096148	0.531584	-0.0289072	-0.33987	0.189715	0.272476	0.172843	0.233931	0.508962	-1.00864	-0.240481
166.88	1.81443	0.39353	0.0212701	0.910998	0.00771553	2.0258	0.415458	0.0452566	0.60049	0.626947	0.621202	0.128778	0.554541	-0.0102166	-0.385781	0.180389	0.266173	0.183181	0.222225	0.502695	-1.01669	-0.219774
167.36	1.85796	0.472573	0.0113696	0.935401	-0.0033505	2.23769	0.385879	0.0375802	0.576868	0.602031	0.626366	0.144118	0.578196	0.00656395	-0.408656	0.181706	0.273986	0.186993	0.203192	0.492784	-1.01746	-0.192764
167.84	1.90556	0.540773	0.00105352	0.951618	-0.00941868	2.41882	0.349925	0.0284186	0.535933	0.572623	0.639282	0.149725	0.59939	0.0249046	-0.405485	0.203688	0.297158	0.186019	0.176325	0.480555	-1.00984	-0.160835
168.32	1.95127	0.584681	-0.0107728	0.963896	-0.0127379	2.54439	0.314665	0.0120279	0.480488	0.544239	0.649577	0.15024	0.617231	0.050191	-0.386706	0.244476	0.334693	0.182179	0.145027	0.470019	-0.993874	-0.126978
168.8	1.99882	0.605856	-0.0250115	0.972308	-0.0156475	2.59417	0.286476	-0.0128217	0.415778	0.521144	0.646232	0.145759	0.630874	0.0829753	-0.366541	0.293918	0.382504	0.177833	0.114439	0.46545	-0.973417	-0.0926401
169.28	2.05129	0.6147	-0.0444023	0.975623	-0.0236084	2.56051	0.27224	-0.0401895	0.351023	0.506753	0.627906	0.136787	0.643145	0.119869	-0.356732	0.335681	0.4448	0.173699	0.0890599	0.467318	-0.957585	-0.0595697
169.76	2.10214	0.626554	-0.0680622	0.974112	-0.0379342	2.46749	0.268803	-0.0584318	0.296263	0.500503	0.603644	0.124166	0.655981	0.155335	-0.352932	0.357442	0.494029	0.172093	0.0713168	0.474556	-0.951331	-0.029602
170.24	2.13473	0.647637	-0.0930174	0.971328	-0.0516288	2.36374	0.265674	-0.0595468	0.255514	0.500465	0.589293	0.112109	0.671675	0.184461	-0.344997	0.356282	0.535379	0.175761	0.0651513	0.485668	-0.955529	-0.00475649
170.72	2.13621	0.668506	-0.114001	0.970824	-0.0583363	2.30208	0.254116	-0.0441702	0.229414	0.501356	0.594708	0.104501	0.688716	0.20663	-0.322377	0.338605	0.564531	0.185953	0.072868	0.498245	-0.966298	0.0140709
171.2	2.10344	0.677012	-0.128908	0.974754	-0.0515695	2.31545	0.233947	-0.0206797	0.220047	0.49915	0.619478	0.103915	0.703643	0.227954	-0.284824	0.314839	0.579647	0.200863	0.0971112	0.512011	-0.976604	0.0257014
171.68	2.05341	0.667612	-0.134159	0.98283	-0.0299305	2.38931	0.211147	0.000250368	0.23116	0.494732	0.660898	0.108523	0.713495	0.254902	-0.242356	0.292682	0.583632	0.215814	0.136193	0.524952	-0.982087	0.0306448
172.16	2.00933	0.647483	-0.132247	0.991892	-0.00111117	2.47623	0.191279	0.0126497	0.264641	0.492551	0.711358	0.119441	0.719297	0.291897	-0.210235	0.271567	0.582523	0.22612	0.184009	0.538355	-0.982317	0.0305024
172.64	1.98906	0.632217	-0.125773	0.994566	0.0251917	2.52503	0.174665	0.0172518	0.316316	0.49837	0.77218	0.140929	0.72593	0.337808	-0.196359	0.253112	0.582029	0.228174	0.232051	0.551813	-0.982976	0.026793
173.12	1.99208	0.635868	-0.115859	0.995858	0.0438426	2.50554	0.156558	0.0181647	0.378653	0.517063	0.840513	0.180584	0.739137	0.386808	-0.195399	0.24046	0.584879	0.224242	0.27322	0.566424	-0.987613	0.0214437
173.6	2.00173	0.655465	-0.107208	0.997768	0.0573243	2.41945	0.132772	0.0192359	0.435779	0.545687	0.914097	0.24319	0.760173	0.427972	-0.196323	0.236743	0.589971	0.218148	0.306133	0.583362	-0.994894	0.0152074
174.08	2.00066	0.678995	-0.105051	1.00934	0.0764789	2.29111	0.102794	0.0210128	0.474872	0.577006	0.979921	0.327792	0.785793	0.449125	-0.185136	0.246688	0.592883	0.211982	0.333501	0.602843	-1.00057	0.0115052
174.56	1.98344	0.685927	-0.110666	1.03159	0.108337	2.14552	0.0743487	0.0227333	0.492069	0.602231	1.03162	0.424896	0.8077	0.442616	-0.158498	0.270066	0.590254	0.206437	0.361256	0.624248	-1.00052	0.0117424
175.04	1.95943	0.671658	-0.122314	1.06532	0.155826	1.99455	0.0535819	0.0245624	0.490536	0.616486	1.0648	0.517421	0.821123	0.410604	-0.123552	0.3012	0.583527	0.201491	0.393393	0.644609	-0.98986	0.0169957
175.52	1.93865	0.639487	-0.133935	1.10219	0.211756	1.84754	0.0422828	0.0278128	0.485209	0.622937	1.08785	0.591913	0.827628	0.363563	-0.0893072	0.33341	0.575291	0.195042	0.428943	0.660239	-0.973846	0.0269537
176	1.92146	0.600954	-0.137029	1.13239	0.263524	1.70763	0.0376744	0.0336429	0.48794	0.627718	1.11	0.638662	0.837281	0.317266	-0.0603878	0.360595	0.56876	0.18786	0.461654	0.669423	-0.955892	0.038187
176.48	1.89406	0.567176	-0.124777	1.15204	0.304983	1.58309	0.0400245	0.0405065	0.50521	0.638326	1.14192	0.660412	0.85802	0.283425	-0.0346029	0.38173	0.561545	0.182492	0.485001	0.673038	-0.939359	0.0482299
176.96	1.84069	0.543674	-0.0991191	1.16244	0.336498	1.49051	0.0507078	0.0479189	0.538777	0.660573	1.18796	0.661237	0.890979	0.262412	-0.00808228	0.400592	0.54821	0.180633	0.495995	0.67224	-0.925296	0.0538653
177.44	1.75636	0.531317	-0.0678702	1.16649	0.365064	1.43763	0.0758653	0.0555208	0.573157	0.695282	1.2494	0.65391	0.92779	0.244525	0.0199219	0.419217	0.522996	0.183417	0.495531	0.666539	-0.912409	0.0519956
177.92	1.6549	0.528844	-0.036375	1.17212	0.398456	1.41839	0.116949	0.0653188	0.600906	0.737484	1.3288	0.64975	0.95553	0.217875	0.0454752	0.439843	0.485267	0.190386	0.48912	0.655001	-0.899643	0.0417434
178.4	1.56087	0.531356	-0.0105794	1.18328	0.43795	1.41306	0.169031	0.0789145	0.612029	0.776087	1.42539	0.660349	0.966175	0.179836	0.0644027	0.465748	0.439951	0.200138	0.483661	0.635899	-0.888596	0.0256277
178.88	1.49312	0.5402	0.0122771	1.19871	0.478618	1.40274	0.22004	0.0963157	0.607753	0.799073	1.53461	0.688875	0.96231	0.140872	0.0768413	0.496139	0.396219	0.210217	0.484076	0.61087	-0.882601	0.0077366
179.36	1.45721	0.551187	0.0346961	1.21555	0.5138	1.37839	0.259781	0.11462	0.593865	0.799907	1.64269	0.730251	0.954616	0.11748	0.0870216	0.528892	0.360599	0.218265	0.490896	0.58589	-0.881849	-0.0070995
179.84	1.44562	0.558393	0.0578004	1.2314	0.540042	1.34599	0.288666	0.130806	0.58234	0.776254	1.73135	0.772198	0.953791	0.118271	0.102374	0.56188	0.336156	0.221087	0.502986	0.567426	-0.883286	-0.0178619
180.32	1.44471	0.56059	0.0820183	1.25018	0.561247	1.31112	0.315154	0.145159	0.580791	0.737768	1.78605	0.797744	0.963191	0.13628	0.122921	0.58957	0.321155	0.215741	0.519561	0.559926	-0.87949	-0.0274433
180.8	1.44481	0.557935	0.104105	1.27469	0.579916	1.27698	0.350536	0.160008	0.590027	0.696855	1.80473	0.798664	0.978706	0.148506	0.140796	0.606906	0.311127	0.203494	0.539863	0.561423	-0.864974	-0.0393888
181.28	1.4455	0.552679	0.127805	1.31142	0.602282	1.23704	0.399911	0.177853	0.603331	0.661576	1.79818	0.777245	0.994074	0.134333	0.147733	0.611347	0.303705	0.186603	0.562241	0.564408	-0.838825	-0.056856
181.76	1.44972	0.543637	0.159326	1.35693	0.628384	1.18667	0.454599	0.197497	0.615209	0.635318	1.77637	0.745107	1.00432	0.0862119	0.140488	0.607554	0.298272	0.170041	0.584328	0.560365	-0.808872	-0.0783592
182.24	1.46404	0.525567	0.203934	1.40179	0.652566	1.1341	0.50193	0.213369	0.619965	0.614325	1.74628	0.71813	1.01183	0.0200689	0.127787	0.605484	0.295165	0.159142	0.602986	0.545965	-0.780995	-0.0987304
182.72	1.49198	0.493271	0.254835	1.42953	0.669466	1.10386	0.534913	0.219552	0.617743	0.596042	1.70975	0.704486	1.0215	-0.0372155	0.120605	0.614265	0.295052	0.157176	0.616208	0.523753	-0.759793	-0.113996
183.2	1.53777	0.446235	0.297511	1.4324	0.676286	1.12281	0.556082	0.214727	0.610668	0.575993	1.66598	0.700513	1.03554	-0.0627971	0.123236	0.637006	0.299615	0.163929	0.625031	0.501664	-0.746176	-0.121704
183.68	1.59535	0.396174	0.31565	1.41402	0.67802	1.19001	0.572246	0.202768	0.598875	0.555331	1.61805	0.697058	1.05226	-0.0560555	0.129907	0.669251	0.31063	0.177255	0.633406	0.485916	-0.73563	-0.126036
184.16	1.65679	0.358785	0.300738	1.3874	0.678154	1.27513	0.587269	0.189581	0.582993	0.534275	1.58022	0.68915	1.06741	-0.0337322	0.128246	0.703846	0.330835	0.19417	0.646295	0.47875	-0.723378	-0.130743
184.64	1.7094	0.347184	0.261311	1.37102	0.680862	1.33427	0.599594	0.180349	0.565468	0.51121	1.56159	0.679816	1.07647	-0.0198738	0.10771	0.731988	0.362289	0.213093	0.665018	0.475904	-0.709545	-0.138167
185.12	1.74033	0.359672	0.218441	1.37413	0.685328	1.33088	0.602453	0.177173	0.551346	0.484464	1.56684	0.679545	1.07607	-0.0280202	0.0672079	0.749812	0.404177	0.231826	0.68795	0.475258	-0.696549	-0.146784
185.6	1.74257	0.387962	0.193265	1.38873	0.688657	1.27649	0.590386	0.180039	0.549142	0.452809	1.58219	0.695744	1.06709	-0.0547501	0.01926	0.754583	0.453039	0.248327	0.709721	0.473732	-0.686088	-0.15225
186.08	1.71587	0.417663	0.19387	1.4074	0.688847	1.21128	0.564824	0.188335	0.56779	0.417242	1.58811	0.722767	1.05046	-0.0852165	-0.0205567	0.749287	0.502763	0.259508	0.725982	0.473704	-0.678364	-0.151957
186.56	1.67069	0.444548	0.21511	1.41886	0.686279	1.17593	0.534121	0.202456	0.608866	0.378082	1.56852	0.74232	1.02823	-0.104893	-0.0420924	0.733472	0.547447	0.261195	0.736013	0.477408	-0.672396	-0.146992
187.04	1.62068	0.46724	0.241192	1.41887	0.687213	1.18736	0.508599	0.222694	0.666913	0.334726	1.53084	0.736286	1.00275	-0.10989	-0.0461322	0.707033	0.582381	0.252622	0.742295	0.487017	-0.665332	-0.140413
187.52	1.58145	0.492538	0.262519	1.41148	0.694418	1.22822	0.493979	0.245766	0.726725	0.2847	1.48657	0.697501	0.977489	-0.107801	-0.0413335	0.67223	0.605904	0.235572	0.749583	0.500836	-0.659679	-0.135693
188	1.56334	0.520348	0.279609	1.40075	0.709747	1.26406	0.491623	0.267108	0.775919	0.228348	1.45615	0.634744	0.955851	-0.111243	-0.037266	0.633155	0.61888	0.214457	0.760226	0.517288	-0.655394	-0.131861
188.48	1.57419	0.545964	0.307305	1.38255	0.730387	1.27456	0.499581	0.282295	0.809406	0.167021	1.44595	0.568538	0.938792	-0.131115	-0.0369533	0.593068	0.62375	0.196397	0.771264	0.535111	-0.649179	-0.128133
188.96	1.61248	0.562167	0.357528	1.35386	0.749428	1.25894	0.5182	0.291391	0.829436	0.105483	1.4423	0.516408	0.92777	-0.17006	-0.0451861	0.553905	0.62319	0.184938	0.779554	0.554639	-0.640809	-0.122782
189.44	1.67262	0.563245	0.430717	1.30809	0.764372	1.23733	0.545347	0.298431	0.846488	0.0483936	1.43414	0.487498	0.919214	-0.22308	-0.0620581	0.514899	0.619685	0.182127	0.783383	0.576954	-0.62996	-0.117422
189.92	1.73951	0.554738	0.513209	1.25096	0.771744	1.23288	0.577209	0.30896	0.863916	-0.00130797	1.4185	0.478185	0.912081	-0.280094	-0.0885969	0.474771	0.614671	0.185113	0.784243	0.602613	-0.62053	-0.114399
190.4	1.80995	0.545365	0.587432	1.1964	0.775599	1.25935	0.605273	0.3255	0.875547	-0.0447777	1.40717	0.478426	0.905925	-0.331112	-0.126293	0.431933	0.60803	0.190845	0.78622	0.631362	-0.617234	-0.115842
190.88	1.88036	0.54553	0.639091	1.15831	0.820872	1.32528	0.621556	0.345284	0.876855	-0.0823794	1.41966	0.478243	0.899698	-0.372193	-0.170331	0.390149	0.5977	0.197383	0.793303	0.663085	-0.622076	-0.120605
191.36	1.952	0.553262	0.670608	1.14831	0.823793	1.4281	0.623923	0.36297	0.865212	-0.115253	1.46303	0.473388	0.893769	-0.40395	-0.215341	0.354946	0.583971	0.204058	0.808042	0.698051	-0.632529	-0.124966
191.84	2.01997	0.560673	0.687864	1.16749	0.825795	1.5589	0.621567	0.373108	0.853837	-0.141306	1.52241	0.462492	0.886338	-0.435505	-0.25457	0.332866	0.5685	0.211013	0.828312	0.735109	-0.642654	-0.125904
192.32	2.06817	0.55833	0.694611	1.20965	0.825791	1.68867	0.627396	0.375428	0.867158	-0.15807	1.56518	0.446175	0.877466	-0.473449	-0.285314	0.328737	0.554648	0.217039	0.849994	0.77207	-0.650525	-0.122342
192.8	2.07654	0.539932	0.691395	1.26431	0.824395	1.78562	0.650377	0.373718	0.918859	-0.164151	1.56415	0.423953	0.868607	-0.519883	-0.31132	0.339332	0.546331	0.222725	0.870784	0.805511	-0.657714	-0.11572
193.28	2.03613	0.510445	0.676665	1.32016	0.821624	1.82625	0.690351	0.373141	1.01082	-0.158031	1.50879	0.398207	0.863854	-0.566742	-0.337879	0.357342	0.545847	0.225506	0.8901	0.83023	-0.667854	-0.107322
193.76	1.9593	0.474573	0.654117	1.3667	0.817764	1.82307	0.732823	0.376986	1.11237	-0.14142	1.4133	0.373039	0.864786	-0.597974	-0.370824	0.374003	0.550004	0.225987	0.906527	0.844072	-0.680815	-0.0984104
194.24	1.88015	0.440739	0.636754	1.39562	0.812859	1.80484	0.765627	0.3846	1.19193	-0.117649	1.30489	0.354431	0.871649	-0.599717	-0.406448	0.386486	0.552195	0.225145	0.918465	0.846619	-0.691176	-0.0886327
194.72	1.84034	0.415536	0.63804	1.39909	0.802469	1.81545	0.780811	0.393637	1.22381	-0.0907877	1.20403	0.348978	0.878833	-0.569764	-0.442852	0.395436	0.544968	0.221718	0.921572	0.841923	-0.687298	-0.0797682
195.2	1.85679	0.398929	0.664508	1.38035	0.782247	1.86922	0.78723	0.401833	1.20571	-0.0637854	1.11928	0.357527	0.880151	-0.517651	-0.475022	0.408834	0.527597	0.214818	0.912685	0.834109	-0.665515	-0.0714921
195.68	1.91298	0.390649	0.708759	1.34395	0.752526	1.94924	0.798907	0.406412	1.157	-0.0453479	1.04614	0.37417	0.871343	-0.460931	-0.501072	0.431378	0.503536	0.203965	0.890237	0.826487	-0.634341	-0.0655189
196.16	1.97365	0.38959	0.755436	1.30191	0.719487	2.0108	0.829679	0.407147	1.10104	-0.0367267	0.981081	0.393235	0.852628	-0.412338	-0.523206	0.464549	0.481644	0.189621	0.860047	0.819459	-0.609365	-0.0617174
196.64	2.00329	0.393668	0.784706	1.25917	0.692412	2.0271	0.881845	0.40367	1.05337	-0.0380285	0.923889	0.406637	0.829543	-0.37574	-0.54165	0.497798	0.468892	0.178928	0.829288	0.815141	-0.602612	-0.0591958
197.12	1.9989	0.401084	0.791201	1.21641	0.680714	2.00025	0.944764	0.395691	1.0131	-0.040217	0.882042	0.414549	0.807571	-0.342618	-0.557868	0.526141	0.466297	0.178188	0.80596	0.812756	-0.613248	-0.0565828
197.6	1.98682	0.409555	0.77578	1.16717	0.681545	1.96401	1.00364	0.382856	0.973402	-0.035672	0.862073	0.421813	0.790454	-0.303424	-0.56829	0.545168	0.468614	0.190957	0.79108	0.812768	-0.632909	-0.0527424
198.08	1.99826	0.419133	0.746292	1.09791	0.686933	1.94648	1.0441	0.365636	0.93214	-0.0200565	0.866742	0.436521	0.779755	-0.256605	-0.573218	0.557222	0.466598	0.2153	0.779165	0.81403	-0.645514	-0.0482532
198.56	2.04634	0.43129	0.707048	1.00994	0.689578	1.95026	1.05772	0.34386	0.893361	0.00810116	0.89043	0.465519	0.776967	-0.20757	-0.572578	0.572855	0.451932	0.243031	0.765576	0.814345	-0.643502	-0.045054
199.04	2.10773	0.449523	0.666103	0.907877	0.683593	1.95798	1.04648	0.318228	0.865591	0.0440578	0.931865	0.507708	0.782989	-0.167369	-0.574964	0.600104	0.424153	0.269795	0.746328	0.81018	-0.633597	-0.0453184
199.52	2.14528	0.471092	0.626059	0.814028	0.672229	1.95136	1.01549	0.289267	0.848046	0.0797081	0.982892	0.556724	0.799351	-0.141007	-0.580575	0.639193	0.390548	0.295314	0.724927	0.800979	-0.619001	-0.0502232
200	2.13781	0.497603	0.592854	0.743952	0.662115	1.93061	0.974577	0.259545	0.836791	0.111095	1.03566	0.605619	0.824885	-0.126472	-0.585717	0.683662	0.360895	0.323869	0.706696	0.78754	-0.606164	-0.060897
200.48	2.09208	0.523062	0.57147	0.711485	0.659471	1.90875	0.928901	0.232879	0.823614	0.133894	1.07663	0.652099	0.854103	-0.115777	-0.584989	0.724293	0.344082	0.358454	0.695412	0.775242	-0.594975	-0.0739393
200.96	2.04108	0.547008	0.566803	0.709356	0.6649	1.90388	0.884222	0.21195	0.804486	0.148633	1.10021	0.698419	0.880479	-0.100849	-0.573973	0.756216	0.341013	0.397404	0.689668	0.768716	-0.577251	-0.0845606
201.44	2.00807	0.565612	0.57404	0.720811	0.672166	1.91201	0.845375	0.199308	0.779903	0.156736	1.10511	0.748816	0.899973	-0.0794196	-0.556219	0.783862	0.345847	0.432354	0.68462	0.772622	-0.547171	-0.0881007
201.92	1.99772	0.581041	0.588055	0.726187	0.673449	1.91043	0.816761	0.193987	0.755181	0.15879	1.10281	0.804557	0.910049	-0.0564809	-0.539448	0.814354	0.349201	0.453958	0.67631	0.786364	-0.506142	-0.0825064
202.4	1.98989	0.595238	0.605568	0.707544	0.665773	1.88561	0.802249	0.195082	0.731666	0.15768	1.10673	0.859266	0.911303	-0.0375734	-0.526634	0.854588	0.343057	0.45775	0.665872	0.806523	-0.462523	-0.0709713
202.88	1.95972	0.608683	0.619014	0.660359	0.650969	1.83747	0.796454	0.201091	0.707507	0.153061	1.11796	0.902544	0.905023	-0.026066	-0.520057	0.900617	0.326759	0.447574	0.656351	0.825361	-0.425488	-0.0593977
203.36	1.90174	0.622266	0.629048	0.588765	0.634929	1.78225	0.794682	0.211613	0.6778	0.145123	1.12835	0.930392	0.890977	-0.020179	-0.511102	0.940289	0.307528	0.43271	0.65038	0.83831	-0.400568	-0.0524912
203.84	1.83167	0.633289	0.635734	0.505975	0.620709	1.73169	0.784595	0.226119	0.641532	0.13124	1.12244	0.946331	0.870078	-0.0182616	-0.490535	0.959753	0.295101	0.42166	0.646791	0.846255	-0.386294	-0.0522601
204.32	1.76461	0.640646	0.635637	0.430719	0.606401	1.67514	0.755336	0.24204	0.601346	0.109292	1.0955	0.959729	0.843527	-0.0213027	-0.454972	0.954809	0.298257	0.419055	0.642758	0.852539	-0.382162	-0.0543075
204.8	1.70807	0.642999	0.626236	0.376794	0.592128	1.59349	0.70403	0.254934	0.56766	0.0760735	1.05636	0.98031	0.814707	-0.0350242	-0.411772	0.934075	0.316031	0.424817	0.634754	0.861652	-0.384003	-0.0542895
205.28	1.64775	0.639846	0.605862	0.35283	0.578951	1.46885	0.639915	0.260833	0.546565	0.0294873	1.02344	1.0078	0.786372	-0.0647514	-0.369938	0.912112	0.342291	0.436798	0.623881	0.871763	-0.390136	-0.0509029
205.76	1.56967	0.635148	0.580717	0.356116	0.569816	1.32275	0.578323	0.258342	0.54494	-0.0271986	1.00435	1.03451	0.759487	-0.108264	-0.340389	0.901366	0.365575	0.452842	0.613505	0.878591	-0.401592	-0.0474845
206.24	1.46905	0.632829	0.558114	0.374786	0.567934	1.20908	0.531874	0.24959	0.566265	-0.0898085	0.995234	1.05182	0.732048	-0.154946	-0.328044	0.90805	0.379406	0.473246	0.606963	0.875021	-0.413001	-0.0492176
206.72	1.3668	0.634361	0.5449	0.395984	0.575774	1.17781	0.503824	0.239364	0.601698	-0.153191	0.97566	1.05824	0.702863	-0.188383	-0.330359	0.925819	0.383983	0.497773	0.603262	0.858634	-0.421339	-0.0590055
207.2	1.28407	0.640803	0.546616	0.404388	0.591778	1.23957	0.485921	0.232572	0.642353	-0.215118	0.93055	1.06304	0.670789	-0.198623	-0.339317	0.944578	0.383925	0.52593	0.599351	0.832589	-0.422307	-0.0734582
207.68	1.23366	0.647683	0.561978	0.392466	0.613813	1.35875	0.466337	0.233343	0.670795	-0.27277	0.858706	1.07363	0.63862	-0.187762	-0.34924	0.956437	0.383458	0.556074	0.590879	0.806316	-0.413179	-0.0865576
208.16	1.20774	0.648097	0.591913	0.355816	0.642864	1.47031	0.438957	0.242516	0.673767	-0.328305	0.776844	1.09534	0.610703	-0.172112	-0.356942	0.960182	0.379785	0.585723	0.577567	0.785053	-0.397558	-0.0938577
208.64	1.18602	0.63727	0.636201	0.300158	0.677706	1.52654	0.406234	0.259792	0.648849	-0.38284	0.707486	1.12374	0.590146	-0.169427	-0.365724	0.959762	0.366733	0.611603	0.561176	0.768216	-0.380433	-0.0953131
209.12	1.15503	0.614443	0.690612	0.234828	0.712407	1.52483	0.378221	0.283866	0.604575	-0.437512	0.663609	1.14844	0.579822	-0.188707	-0.375813	0.95914	0.336861	0.632115	0.544639	0.749785	-0.367241	-0.0953399
209.6	1.11353	0.580607	0.745124	0.17243	0.737624	1.50315	0.360704	0.312886	0.558236	-0.487268	0.639623	1.16222	0.578789	-0.22404	-0.39298	0.958939	0.292242	0.645949	0.530564	0.724924	-0.357599	-0.0980692
210.08	1.07214	0.540284	0.78872	0.120496	0.747246	1.50825	0.356619	0.342638	0.528943	-0.525874	0.621059	1.16909	0.585562	-0.258207	-0.4159	0.956025	0.241985	0.652383	0.518956	0.694258	-0.350289	-0.103368
210.56	1.03877	0.50093	0.808939	0.0816077	0.739399	1.55584	0.36334	0.370542	0.525109	-0.548408	0.593316	1.17797	0.597401	-0.276053	-0.442883	0.943743	0.19898	0.654994	0.508248	0.663178	-0.342332	-0.107311
211.04	1.01205	0.467004	0.805307	0.0485872	0.723079	1.62118	0.374049	0.394039	0.539685	-0.556595	0.559059	1.19386	0.610975	-0.275008	-0.468663	0.923348	0.17162	0.657672	0.497927	0.640481	-0.328139	-0.106869
211.52	0.981658	0.440845	0.789727	0.0106602	0.711114	1.66131	0.383045	0.413751	0.559437	-0.555767	0.535034	1.21643	0.621719	-0.264941	-0.489278	0.898069	0.157734	0.663371	0.490154	0.621933	-0.30889	-0.102843
212	0.942006	0.419413	0.780088	-0.0321273	0.713355	1.63883	0.389673	0.430335	0.570444	-0.55176	0.536599	1.23473	0.629521	-0.257608	-0.499307	0.87296	0.14729	0.673951	0.486726	0.608907	-0.287194	-0.0988301
212.48	0.895217	0.402371	0.790642	-0.0722394	0.730181	1.55836	0.393037	0.44347	0.567118	-0.544386	0.56655	1.23623	0.633758	-0.259959	-0.501381	0.850779	0.131623	0.68708	0.488689	0.594443	-0.26643	-0.0980764
212.96	0.852238	0.393839	0.827933	-0.100057	0.751355	1.44642	0.395456	0.452277	0.554448	-0.530323	0.6175	1.22101	0.636779	-0.267491	-0.498958	0.830846	0.109791	0.698418	0.495082	0.577988	-0.248535	-0.102044
213.44	0.825791	0.393956	0.883697	-0.106412	0.766587	1.34782	0.398718	0.456153	0.538884	-0.501302	0.672424	1.19535	0.641276	-0.270081	-0.494569	0.812535	0.0887551	0.703724	0.502887	0.562138	-0.235039	-0.108998
213.92	0.821797	0.403086	0.943973	-0.0921666	0.768145	1.28599	0.404689	0.45684	0.52018	-0.454573	0.720943	1.17442	0.647866	-0.261095	-0.486583	0.792269	0.0778085	0.703308	0.508473	0.550846	-0.225781	-0.116081
214.4	0.834939	0.419702	0.991526	-0.0683884	0.76093	1.25487	0.416649	0.457316	0.49435	-0.392493	0.763567	1.16982	0.655065	-0.242004	-0.469009	0.7681	0.0808298	0.700623	0.508437	0.544443	-0.219574	-0.121129
214.88	0.850555	0.437238	1.02135	-0.0465083	0.754365	1.23857	0.430723	0.459852	0.455002	-0.325644	0.805433	1.18383	0.662565	-0.223671	-0.438882	0.737318	0.0919187	0.699521	0.502739	0.53934	-0.213776	-0.123791
215.36	0.853931	0.449855	1.03406	-0.0319415	0.755624	1.21667	0.440893	0.463614	0.399859	-0.262511	0.846505	1.21137	0.670791	-0.211855	-0.399791	0.698928	0.100629	0.700267	0.491351	0.527637	-0.205539	-0.124425
215.84	0.834416	0.452849	1.03645	-0.0213165	0.765553	1.1812	0.440868	0.464451	0.334089	-0.208114	0.877314	1.24393	0.679651	-0.201528	-0.360105	0.654814	0.0978273	0.696503	0.473396	0.508278	-0.196475	-0.123288
216.32	0.800294	0.447857	1.03458	-0.00601772	0.780466	1.13467	0.427136	0.455653	0.270455	-0.164282	0.882708	1.27588	0.689818	-0.187415	-0.33326	0.604708	0.082579	0.681263	0.452135	0.48383	-0.18731	-0.121018
216.8	0.755291	0.4358	1.03451	0.00599059	0.79516	1.08915	0.404112	0.43642	0.219284	-0.130574	0.851593	1.30209	0.698522	-0.172527	-0.328449	0.553076	0.0594883	0.650566	0.431944	0.46431	-0.18304	-0.119101
217.28	0.709508	0.416568	1.04161	0.00511562	0.807161	1.05821	0.376627	0.410249	0.191483	-0.111043	0.791959	1.31952	0.703283	-0.163666	-0.346206	0.503039	0.0358247	0.605351	0.419191	0.455637	-0.185432	-0.120481
217.76	0.659379	0.389639	1.05998	-0.0201892	0.815004	1.04546	0.346809	0.38349	0.190046	-0.10548	0.726066	1.32196	0.702295	-0.170158	-0.378805	0.456311	0.0150391	0.553469	0.41714	0.460744	-0.1936	-0.124963
218.24	0.599744	0.354178	1.09045	-0.0720417	0.822433	1.04765	0.318363	0.360491	0.211685	-0.109934	0.678416	1.30433	0.695394	-0.194477	-0.413116	0.415737	-0.00340372	0.501841	0.424755	0.473379	-0.204377	-0.129466
218.72	0.528108	0.313874	1.12729	-0.141561	0.831106	1.05693	0.287575	0.340964	0.247095	-0.113695	0.656621	1.26786	0.684804	-0.227642	-0.441088	0.381637	-0.0221248	0.456997	0.437982	0.486221	-0.2133	-0.129467
219.2	0.453887	0.272671	1.16537	-0.205489	0.84216	1.06201	0.255582	0.32105	0.284842	-0.101446	0.644482	1.22154	0.673136	-0.253542	-0.457562	0.359654	-0.0400664	0.418308	0.448801	0.494378	-0.216909	-0.123573
219.68	0.398253	0.236656	1.19697	-0.252244	0.856121	1.06193	0.224432	0.298432	0.314723	-0.0637346	0.615435	1.18365	0.661255	-0.258446	-0.463672	0.354575	-0.052832	0.384137	0.451503	0.494433	-0.215291	-0.113804
220.16	0.37718	0.205716	1.22208	-0.277451	0.875901	1.06543	0.196765	0.27447	0.329782	-0.000896703	0.554195	1.16684	0.64974	-0.237969	-0.461478	0.362585	-0.0540794	0.349335	0.444576	0.486981	-0.210159	-0.104759
220.64	0.391084	0.173916	1.2445	-0.290915	0.903293	1.08384	0.177927	0.253978	0.332639	0.0758749	0.469056	1.17838	0.63821	-0.197499	-0.457318	0.374738	-0.0392191	0.313816	0.431939	0.47523	-0.202468	-0.101496
221.12	0.422089	0.1393	1.2713	-0.300968	0.939664	1.13126	0.169815	0.240083	0.332128	0.15126	0.395539	1.21284	0.62653	-0.14739	-0.455121	0.37821	-0.0101066	0.278926	0.419757	0.465118	-0.195146	-0.103302
221.6	0.437084	0.104545	1.30423	-0.302898	0.980158	1.20659	0.173008	0.231369	0.337726	0.214747	0.368574	1.25993	0.616396	-0.100306	-0.459375	0.359859	0.0262175	0.246666	0.41402	0.462418	-0.187516	-0.107174
222.08	0.417776	0.0757258	1.3361	-0.290318	1.02108	1.28872	0.185311	0.22235	0.351722	0.260275	0.401863	1.31426	0.607095	-0.0629106	-0.472339	0.317625	0.05862	0.218713	0.414917	0.47261	-0.179361	-0.108504
222.56	0.368177	0.0643005	1.35443	-0.25601	1.05875	1.34819	0.20217	0.20746	0.367201	0.292617	0.47547	1.37111	0.597701	-0.0400754	-0.494728	0.258634	0.0774912	0.195911	0.419331	0.497826	-0.166989	-0.106423
223.04	0.313386	0.073866	1.35242	-0.207296	1.09118	1.36445	0.219896	0.187529	0.371931	0.315927	0.549154	1.42833	0.586407	-0.0323576	-0.523479	0.200241	0.0781014	0.178759	0.420217	0.531041	-0.148587	-0.102692
223.52	0.285895	0.0956495	1.32959	-0.163796	1.12135	1.34162	0.233018	0.16844	0.355815	0.333379	0.590852	1.47606	0.570743	-0.03699	-0.55809	0.157825	0.0609853	0.167632	0.411243	0.561939	-0.121993	-0.0991082
224	0.3024	0.113929	1.29866	-0.145356	1.15093	1.30551	0.23589	0.157304	0.322077	0.34827	0.592816	1.50156	0.5514	-0.0504518	-0.59536	0.138734	0.031627	0.159528	0.392861	0.579356	-0.0894686	-0.096929
224.48	0.358925	0.112843	1.27431	-0.157851	1.17968	1.28477	0.229688	0.156235	0.278448	0.359885	0.576488	1.49631	0.532205	-0.0665864	-0.633449	0.138922	-0.00335706	0.151164	0.368371	0.579887	-0.0542312	-0.0940815
224.96	0.432566	0.0933054	1.26261	-0.192874	1.20502	1.29873	0.215109	0.16092	0.244042	0.375661	0.568083	1.46321	0.518759	-0.0820467	-0.670865	0.148992	-0.0352632	0.138406	0.345852	0.566146	-0.0232825	-0.0924194
225.44	0.500536	0.0638461	1.26073	-0.226568	1.21967	1.35245	0.196866	0.16328	0.231726	0.398127	0.584721	1.41639	0.519123	-0.0963571	-0.701815	0.153932	-0.0585128	0.120521	0.329561	0.548481	-0.00231483	-0.0929745
225.92	0.550068	0.0399889	1.25265	-0.242386	1.21955	1.43209	0.17852	0.15798	0.240042	0.429518	0.622946	1.36924	0.535607	-0.108394	-0.718952	0.148012	-0.0695696	0.100583	0.319072	0.536536	0.00947722	-0.0977088
226.4	0.582599	0.0299408	1.23265	-0.235365	1.20616	1.5198	0.160101	0.14533	0.265964	0.465225	0.660617	1.331	0.566201	-0.114374	-0.718534	0.129115	-0.0696163	0.0829585	0.311436	0.536891	0.0157477	-0.107223
226.88	0.606382	0.0320842	1.20103	-0.220091	1.18642	1.60301	0.140797	0.130685	0.297866	0.496388	0.678513	1.299	0.601555	-0.110324	-0.699563	0.10136	-0.0604531	0.0726447	0.30303	0.546515	0.0206515	-0.117886
227.36	0.625389	0.0375196	1.16878	-0.209688	1.16539	1.67867	0.11688	0.119792	0.326706	0.514356	0.666724	1.26626	0.631347	-0.0904944	-0.670134	0.068872	-0.0465421	0.0689791	0.291834	0.558692	0.0273496	-0.123038
227.84	0.638813	0.0400112	1.14742	-0.21356	1.15047	1.74335	0.0861057	0.11288	0.344141	0.518702	0.628966	1.23015	0.646622	-0.0555595	-0.636345	0.0341346	-0.031812	0.0681369	0.282055	0.5662	0.0352806	-0.12005
228.32	0.64098	0.0347803	1.14021	-0.228385	1.13852	1.7924	0.0482214	0.108824	0.349832	0.509011	0.574755	1.19569	0.646535	-0.0109021	-0.604832	-0.00134642	-0.0182902	0.0657122	0.278238	0.563927	0.0375525	-0.108437
228.8	0.632105	0.0223571	1.13467	-0.242072	1.12834	1.82443	0.00497895	0.104524	0.345303	0.492005	0.517888	1.17081	0.635772	0.0341169	-0.576335	-0.0362133	-0.00611388	0.0624584	0.283464	0.554365	0.0299237	-0.0937317
229.28	0.618061	0.00124639	1.11593	-0.246215	1.11614	1.83609	-0.0421966	0.100965	0.333208	0.473474	0.461974	1.15771	0.620526	0.0754674	-0.545929	-0.0669396	0.00645369	0.0619411	0.296788	0.544612	0.01082	-0.0819997
229.76	0.607825	-0.0265491	1.07154	-0.242962	1.10267	1.83054	-0.092273	0.10119	0.324495	0.45757	0.408581	1.1483	0.607163	0.113908	-0.509423	-0.0909347	0.022804	0.0674536	0.312781	0.54003	-0.0161629	-0.0767141
230.24	0.606545	-0.0580396	1.00325	-0.246528	1.0886	1.81669	-0.144046	0.107166	0.329824	0.449111	0.353621	1.12818	0.599805	0.151773	-0.468038	-0.10798	0.045765	0.078758	0.326269	0.54194	-0.0467746	-0.0778153
230.72	0.606588	-0.0798521	0.925394	-0.269724	1.08126	1.80307	-0.197148	0.116621	0.357321	0.453387	0.295289	1.0901	0.59873	0.190539	-0.427904	-0.116921	0.0766582	0.0908371	0.337868	0.548298	-0.0765268	-0.0823885
231.2	0.592432	-0.0829207	0.851861	-0.3143	1.08447	1.79285	-0.249763	0.12284	0.407302	0.472051	0.231252	1.03485	0.60463	0.227975	-0.397894	-0.117174	0.112641	0.099269	0.349466	0.556062	-0.101768	-0.0884366
231.68	0.555949	-0.0579579	0.79436	-0.372865	1.09773	1.79487	-0.301711	0.120036	0.468118	0.499319	0.163756	0.973489	0.61981	0.258188	-0.381988	-0.106516	0.148772	0.102183	0.365137	0.566091	-0.120783	-0.0931313
232.16	0.503565	-0.00974618	0.753968	-0.420605	1.11936	1.81151	-0.350072	0.106907	0.525765	0.525068	0.0974586	0.915793	0.64444	0.277129	-0.379804	-0.0835397	0.17781	0.101718	0.386395	0.581542	-0.133594	-0.0947528
232.64	0.448952	0.0458919	0.727239	-0.44302	1.14439	1.8374	-0.394969	0.0877232	0.568792	0.538911	0.0412336	0.865217	0.676504	0.286548	-0.385869	-0.0505297	0.196537	0.100369	0.410314	0.606335	-0.139345	-0.0920863
233.12	0.414001	0.0938414	0.710945	-0.436767	1.16658	1.85805	-0.435842	0.0689694	0.599681	0.537291	0.00343843	0.816972	0.711632	0.287371	-0.393507	-0.0118652	0.205232	0.0983309	0.433657	0.640152	-0.136432	-0.0852036
233.6	0.40875	0.123797	0.705918	-0.412103	1.17834	1.85214	-0.475399	0.0546377	0.630463	0.530421	-0.010585	0.76689	0.742929	0.280774	-0.395352	0.0237347	0.208814	0.0899252	0.451424	0.678708	-0.127247	-0.0746193
234.08	0.430255	0.138931	0.715021	-0.387821	1.17938	1.79491	-0.518445	0.0438943	0.673844	0.530281	-0.00652708	0.71093	0.766382	0.26675	-0.386591	0.0498476	0.213665	0.0700296	0.461554	0.712729	-0.114824	-0.0648451
234.56	0.467257	0.151455	0.739599	-0.37727	1.16935	1.67875	-0.56493	0.0334655	0.734931	0.543447	0.00119646	0.652454	0.778816	0.245311	-0.366984	0.0632129	0.224476	0.0392184	0.46436	0.735718	-0.101108	-0.0568243
235.04	0.512289	0.168759	0.775765	-0.37899	1.14982	1.51705	-0.613584	0.0210392	0.806353	0.566902	-0.00943681	0.596051	0.782791	0.221054	-0.339857	0.0661603	0.242868	0.0042044	0.4604	0.746056	-0.0891803	-0.0527211
235.52	0.559139	0.190113	0.817544	-0.386008	1.12953	1.34475	-0.658851	0.00753854	0.874477	0.589248	-0.0558454	0.547117	0.781074	0.200189	-0.309676	0.0616754	0.266674	-0.0237327	0.453541	0.746559	-0.0817914	-0.0478666
236	0.606279	0.208965	0.860897	-0.38515	1.11159	1.19192	-0.69131	-0.00539113	0.924498	0.600486	-0.144884	0.508511	0.776261	0.188292	-0.282339	0.050058	0.292382	-0.0362283	0.44467	0.741896	-0.0774411	-0.0390155
236.48	0.645202	0.216076	0.904116	-0.369578	1.10066	1.06972	-0.708948	-0.0166942	0.949579	0.60021	-0.265083	0.482373	0.768238	0.184288	-0.260753	0.0319808	0.317526	-0.0317943	0.4366	0.738577	-0.0736312	-0.0244375
236.96	0.666176	0.210555	0.943247	-0.338113	1.09653	0.97187	-0.713205	-0.0273694	0.950826	0.599131	-0.39006	0.471365	0.755418	0.180324	-0.242065	0.00807286	0.339635	-0.0158298	0.430409	0.738175	-0.0672923	-0.00587838
237.44	0.657053	0.204042	0.97453	-0.299972	1.09397	0.86948	-0.713998	-0.0394687	0.933482	0.604719	-0.491314	0.476481	0.735169	0.171056	-0.219747	-0.0206331	0.358029	0.00363189	0.424556	0.740276	-0.0556909	0.0131029
237.92	0.615592	0.206048	0.988863	-0.260397	1.086	0.748138	-0.720172	-0.0523755	0.904613	0.6195	-0.549452	0.492401	0.707448	0.159563	-0.190448	-0.0482795	0.371905	0.0200229	0.418447	0.745044	-0.0404718	0.0294844
238.4	0.554291	0.220745	0.981753	-0.221672	1.06999	0.618218	-0.734466	-0.0631582	0.868163	0.634419	-0.570804	0.508791	0.675576	0.155602	-0.158736	-0.0722053	0.380778	0.0304787	0.409573	0.750268	-0.0217702	0.0440588
238.88	0.498633	0.244184	0.956065	-0.188573	1.04442	0.500871	-0.755462	-0.0667124	0.82898	0.639242	-0.566866	0.515436	0.645631	0.167201	-0.131998	-0.0924698	0.385109	0.0383215	0.397647	0.756198	-0.00736991	0.0602543
239.36	0.469511	0.265128	0.925508	-0.165589	1.01463	0.41774	-0.777296	-0.0596476	0.793816	0.627967	-0.557551	0.506565	0.623423	0.192517	-0.116818	-0.107332	0.385413	0.0445662	0.382695	0.76339	0.000927454	0.0796733
239.84	0.479326	0.28319	0.903196	-0.156547	0.986448	0.376376	-0.793708	-0.0447499	0.765419	0.601057	-0.553251	0.482479	0.610984	0.218206	-0.111456	-0.117811	0.383326	0.049415	0.368259	0.772873	0.00219359	0.101502
240.32	0.523159	0.299182	0.903357	-0.165199	0.966952	0.364205	-0.8034	-0.0270475	0.7469	0.563156	-0.556485	0.449014	0.605863	0.228197	-0.105216	-0.119986	0.380862	0.0509554	0.358647	0.787385	-0.00228727	0.121427
240.8	0.584877	0.3202	0.92618	-0.192461	0.961388	0.351456	-0.804629	-0.0132579	0.736727	0.519103	-0.554409	0.413809	0.602615	0.219392	-0.0856251	-0.114076	0.379238	0.0484221	0.354131	0.807387	-0.0139776	0.13365
241.28	0.643265	0.3493	0.962169	-0.232663	0.970733	0.323338	-0.797353	-0.00740747	0.735019	0.47073	-0.527227	0.382874	0.5956	0.200914	-0.0476256	-0.100561	0.379021	0.0410277	0.354966	0.831622	-0.0315343	0.136278
241.76	0.687041	0.383492	0.995306	-0.274476	0.994436	0.275077	-0.781262	-0.00840198	0.739894	0.417324	-0.474378	0.360458	0.585057	0.190627	0.00309807	-0.0814019	0.382227	0.0305284	0.358058	0.857051	-0.0572173	0.132763
242.24	0.717591	0.413246	1.01622	-0.312878	1.02846	0.208907	-0.758194	-0.0110094	0.751186	0.36013	-0.405298	0.347863	0.573206	0.196855	0.0549317	-0.0617761	0.391063	0.0184198	0.360062	0.879891	-0.0876141	0.128693
242.72	0.752759	0.431206	1.01647	-0.347134	1.06922	0.126162	-0.727802	-0.0111268	0.766356	0.300697	-0.343298	0.344555	0.566261	0.213049	0.0958579	-0.0416326	0.406149	0.00558719	0.358655	0.895469	-0.115596	0.12976
243.2	0.818996	0.436531	0.992652	-0.379083	1.11304	0.0280497	-0.693185	-0.00752926	0.782076	0.239505	-0.316598	0.350565	0.568489	0.223823	0.122681	-0.0240212	0.441257	-0.00743323	0.352769	0.902861	-0.134574	0.136308
243.68	0.930826	0.434328	0.948429	-0.408473	1.15458	-0.0770994	-0.657616	-0.00214396	0.795854	0.176046	-0.336679	0.366748	0.580647	0.216985	0.142387	-0.00584203	0.456718	-0.0205054	0.343782	0.901072	-0.140688	0.144835
244.16	1.08427	0.430153	0.886139	-0.436425	1.19271	-0.174026	-0.630103	0.000761329	0.804975	0.111471	-0.39373	0.38689	0.601013	0.195517	0.164257	0.0143736	0.460184	-0.0325538	0.331922	0.89022	-0.134382	0.151796
244.64	1.2486	0.429194	0.813681	-0.455221	1.22549	-0.243435	-0.613765	-0.000883604	0.812133	0.0507132	-0.464896	0.403068	0.625864	0.172967	0.191661	0.0336212	0.446464	-0.0389384	0.319744	0.871986	-0.122897	0.156656
245.12	1.38804	0.428946	0.740592	-0.460938	1.25037	-0.267942	-0.609727	-0.00670684	0.818338	0.00112244	-0.522489	0.403523	0.650205	0.166187	0.223713	0.0498126	0.415532	-0.0371617	0.307219	0.847592	-0.11231	0.160754
245.6	1.47668	0.427555	0.675917	-0.448039	1.26868	-0.248861	-0.61596	-0.0128662	0.826679	-0.0299791	-0.560237	0.382655	0.671269	0.179787	0.255303	0.0580183	0.375047	-0.0263984	0.295767	0.819821	-0.108835	0.16633
246.08	1.51313	0.423278	0.625349	-0.421473	1.28062	-0.190238	-0.623074	-0.0145571	0.833015	-0.0451982	-0.588854	0.345445	0.687522	0.201897	0.283579	0.0597907	0.336924	-0.0101254	0.286037	0.789956	-0.109669	0.173813
246.56	1.51497	0.416641	0.586227	-0.390151	1.29077	-0.098576	-0.624249	-0.00912891	0.832516	-0.0508073	-0.628035	0.302037	0.698968	0.218138	0.309165	0.0566563	0.309187	0.00641341	0.279281	0.758171	-0.114025	0.184162
247.04	1.50341	0.406258	0.553457	-0.362282	1.30014	0.024916	-0.611848	0.00431535	0.821603	-0.0547901	-0.689972	0.267495	0.705802	0.217185	0.333083	0.0492152	0.294433	0.0192011	0.276391	0.726276	-0.119875	0.196199
247.52	1.49054	0.387489	0.520382	-0.342561	1.30729	0.182309	-0.586029	0.0230404	0.800932	-0.0629691	-0.770671	0.248599	0.709328	0.200305	0.354239	0.0356661	0.289439	0.0275382	0.27962	0.694676	-0.127185	0.209127
248	1.48226	0.3553	0.486347	-0.331903	1.30827	0.364068	-0.55305	0.0429722	0.774212	-0.0751226	-0.855672	0.240459	0.710514	0.177635	0.370761	0.0146534	0.289349	0.0344868	0.288342	0.666671	-0.137915	0.223316
248.48	1.47843	0.308105	0.454985	-0.326797	1.29423	0.551003	-0.520758	0.0586319	0.746163	-0.0880452	-0.932655	0.23221	0.711638	0.161743	0.383039	-0.0110302	0.293687	0.0427228	0.301918	0.646597	-0.150635	0.23743
248.96	1.48266	0.251038	0.430574	-0.320755	1.26508	0.718015	-0.494457	0.0663318	0.71975	-0.102041	-1.0003	0.2159	0.715116	0.156308	0.394148	-0.0375297	0.303985	0.0504001	0.319584	0.637214	-0.16248	0.249372
249.44	1.50231	0.195379	0.418879	-0.30284	1.22892	0.844397	-0.476531	0.0650002	0.694508	-0.119959	-1.0647	0.194869	0.724242	0.159003	0.40807	-0.0584524	0.323575	0.0539158	0.339796	0.637437	-0.167607	0.255803
249.92	1.53698	0.150745	0.421759	-0.262725	1.1979	0.927194	-0.463726	0.0552955	0.670409	-0.140471	-1.12403	0.181673	0.742115	0.162264	0.432211	-0.0633311	0.350314	0.049318	0.362465	0.644651	-0.161572	0.258119
250.4	1.57733	0.116773	0.440673	-0.192752	1.18563	0.975126	-0.452199	0.0412966	0.646517	-0.161618	-1.16821	0.190281	0.769665	0.159122	0.465098	-0.0539621	0.378922	0.0377917	0.386887	0.656416	-0.146149	0.257779
250.88	1.60398	0.08912	0.478247	-0.0947717	1.19162	0.998464	-0.440292	0.0279869	0.625994	-0.176652	-1.18201	0.22549	0.804609	0.151196	0.504769	-0.0338552	0.403282	0.0261203	0.41373	0.670521	-0.123589	0.259973
251.36	1.60351	0.0663553	0.533887	0.0192274	1.20817	1.0069	-0.429356	0.0177038	0.617381	-0.181422	-1.15999	0.279055	0.840274	0.142824	0.543638	-0.0153455	0.421118	0.0208944	0.44192	0.687678	-0.0969731	0.266206
251.84	1.57673	0.0450959	0.59965	0.134449	1.22093	1.00998	-0.419324	0.0106078	0.629715	-0.179295	-1.11319	0.337639	0.868902	0.138968	0.576832	-0.00526591	0.434138	0.0228388	0.470775	0.707539	-0.0700867	0.277163
252.32	1.53714	0.0307726	0.665192	0.228499	1.21999	1.0133	-0.411416	0.00420944	0.666658	-0.180854	-1.06338	0.393347	0.886173	0.14028	0.602116	-0.00665399	0.443727	0.0271224	0.498812	0.72624	-0.0436083	0.290032
252.8	1.50625	0.0250366	0.717415	0.292371	1.20348	1.02419	-0.404708	-0.00370343	0.723572	-0.196842	-1.03101	0.450596	0.891327	0.143148	0.621822	-0.0161512	0.449013	0.0245296	0.522145	0.740614	-0.0217766	0.301043
253.28	1.50208	0.0246811	0.747543	0.320418	1.17768	1.04402	-0.400142	-0.0136503	0.785869	-0.230228	-1.01543	0.519735	0.887259	0.142357	0.642307	-0.0278196	0.445067	0.0114669	0.539966	0.746104	-0.00506453	0.308818
253.76	1.52236	0.021478	0.754416	0.326756	1.14907	1.06357	-0.397208	-0.0245037	0.794744	-0.277087	-1.00382	0.601879	0.879344	0.132475	0.668225	-0.0355995	0.42962	-0.00792635	0.553033	0.7437	-0.000167389	0.313253
254.24	1.55363	0.00978385	0.741598	0.33358	1.12103	1.06395	-0.396247	-0.0333062	0.815641	-0.324152	-0.976468	0.685943	0.871105	0.112738	0.698393	-0.0372837	0.405877	-0.0249667	0.562885	0.738457	-0.00664649	0.314132
254.72	1.57476	-0.014526	0.719105	0.354463	1.09347	1.03554	-0.399975	-0.0391673	0.803727	-0.362808	-0.922276	0.751467	0.864652	0.0871668	0.730129	-0.0337805	0.383742	-0.0318693	0.572443	0.735592	-0.025528	0.311062
255.2	1.57863	-0.0456533	0.692591	0.394172	1.06615	0.980671	-0.411225	-0.0430366	0.769727	-0.387353	-0.84702	0.781111	0.859241	0.0611369	0.757861	-0.0249895	0.371085	-0.029738	0.583708	0.737659	-0.0509117	0.304546
255.68	1.56889	-0.0738251	0.669363	0.440462	1.04006	0.921764	-0.433206	-0.0473027	0.725936	-0.399284	-0.766973	0.775487	0.853352	0.0400041	0.774639	-0.0130328	0.369542	-0.02461	0.595361	0.743995	-0.0726587	0.296566
256.16	1.55852	-0.0945795	0.652635	0.478374	1.01809	0.878362	-0.468836	-0.0540235	0.684846	-0.399973	-0.698448	0.749709	0.845682	0.0273081	0.77651	0.00322185	0.374022	-0.0251837	0.606728	0.748745	-0.0881418	0.290696
256.64	1.56166	-0.104565	0.647472	0.496863	1.00092	0.85934	-0.51511	-0.063256	0.654553	-0.387002	-0.648177	0.723405	0.83315	0.0224456	0.765019	0.0226972	0.377364	-0.0362012	0.616282	0.750777	-0.0974328	0.291531
257.12	1.58255	-0.104884	0.654879	0.499104	0.985276	0.849829	-0.569085	-0.073278	0.63613	-0.354404	-0.619927	0.707747	0.813945	0.0242741	0.741081	0.0437459	0.378244	-0.0555066	0.624135	0.749105	-0.105258	0.297818
257.6	1.60738	-0.100443	0.66846	0.500037	0.96837	0.822099	-0.623204	-0.0813695	0.630113	-0.300098	-0.602783	0.6987	0.786472	0.0295326	0.713083	0.062283	0.38132	-0.0779676	0.631543	0.745845	-0.115165	0.306338
258.08	1.61983	-0.0953294	0.683382	0.519111	0.947477	0.761898	-0.670364	-0.0864141	0.634462	-0.225389	-0.59183	0.685328	0.752288	0.0349181	0.685762	0.0771387	0.389516	-0.0983161	0.640412	0.741347	-0.131331	0.310865
258.56	1.60625	-0.0930116	0.692217	0.565044	0.92558	0.670211	-0.705007	-0.0868854	0.643993	-0.140652	-0.584569	0.656897	0.716009	0.038763	0.664406	0.0873147	0.400053	-0.114486	0.651349	0.738525	-0.148013	0.306463
259.04	1.57007	-0.0948832	0.692111	0.629313	0.906157	0.566557	-0.730623	-0.0849433	0.649002	-0.0601913	-0.581539	0.618468	0.682486	0.0411832	0.65219	0.092093	0.401937	-0.128066	0.665033	0.738322	-0.159714	0.293638
259.52	1.52008	-0.0992331	0.684302	0.692892	0.890046	0.46753	-0.748854	-0.0822856	0.641046	0.0050805	-0.584389	0.58153	0.654245	0.0456439	0.647967	0.0937054	0.384273	-0.140701	0.680824	0.743017	-0.161974	0.275639
260	1.47488	-0.103255	0.675442	0.737369	0.872257	0.383719	-0.758351	-0.0815069	0.614933	0.0506124	-0.59723	0.557989	0.631118	0.0553773	0.651002	0.094809	0.346048	-0.154758	0.697988	0.754969	-0.157885	0.25592
260.48	1.44202	-0.10387	0.671066	0.7526	0.846326	0.309506	-0.760807	-0.0836926	0.577877	0.0797578	-0.615795	0.549373	0.613481	0.0701639	0.66121	0.0939334	0.298438	-0.170662	0.714906	0.773653	-0.152652	0.234241
260.96	1.41384	-0.10274	0.669236	0.744405	0.808985	0.226011	-0.758615	-0.0894963	0.544724	0.0974158	-0.634499	0.548597	0.600942	0.0875935	0.677587	0.0905569	0.258029	-0.187498	0.731052	0.796526	-0.153182	0.208182
261.44	1.38259	-0.103335	0.665468	0.728847	0.764227	0.123397	-0.756189	-0.0975654	0.534878	0.108995	-0.642812	0.541931	0.593836	0.101602	0.696639	0.0844802	0.236856	-0.204916	0.742596	0.818211	-0.161025	0.176483
261.92	1.33931	-0.114131	0.653138	0.717854	0.717408	-0.00606819	-0.759423	-0.107833	0.554059	0.112307	-0.632448	0.519319	0.592248	0.109753	0.715304	0.0764008	0.233415	-0.222422	0.745935	0.834698	-0.173854	0.140508
262.4	1.28247	-0.135995	0.630225	0.711111	0.674983	-0.157094	-0.770141	-0.12022	0.595726	0.107984	-0.601532	0.47891	0.592488	0.11181	0.73415	0.069327	0.237436	-0.239898	0.736692	0.845689	-0.179529	0.105841
262.88	1.22001	-0.166138	0.604941	0.70113	0.639877	-0.318567	-0.787113	-0.135022	0.642002	0.0976796	-0.549962	0.426654	0.590287	0.11291	0.754553	0.0653424	0.238789	-0.256306	0.71399	0.854434	-0.173907	0.0787079
263.36	1.15838	-0.198365	0.586467	0.677737	0.607812	-0.475468	-0.807189	-0.151635	0.674456	0.0850053	-0.474194	0.371651	0.582925	0.118107	0.77952	0.0632595	0.235029	-0.271281	0.681477	0.864175	-0.158447	0.0614652
263.84	1.09666	-0.230346	0.585139	0.642142	0.57506	-0.618244	-0.822035	-0.167872	0.684038	0.0766389	-0.372524	0.325328	0.571346	0.130389	0.808903	0.0585566	0.231804	-0.285778	0.646423	0.875842	-0.143386	0.0523478
264.32	1.03363	-0.260923	0.605686	0.603922	0.54052	-0.748136	-0.829757	-0.178759	0.674775	0.0727692	-0.242012	0.290468	0.560757	0.147876	0.83889	0.0488208	0.236737	-0.300208	0.616279	0.887361	-0.138588	0.0437115
264.8	0.964287	-0.293436	0.64406	0.571994	0.504294	-0.869304	-0.829835	-0.179271	0.660408	0.0673302	-0.0876226	0.267991	0.556051	0.166247	0.860094	0.0275864	0.253954	-0.314723	0.593744	0.894854	-0.146033	0.0308784
265.28	0.889544	-0.32705	0.691742	0.552822	0.470515	-0.982783	-0.818803	-0.166086	0.654416	0.0499998	0.0726867	0.257703	0.558661	0.181051	0.865032	0.000105837	0.280702	-0.330322	0.577656	0.894355	-0.159425	0.012216
265.76	0.813684	-0.358814	0.741624	0.54545	0.442421	-1.08267	-0.794299	-0.141531	0.663961	0.011996	0.217166	0.25849	0.563822	0.188971	0.855425	-0.0284213	0.311206	-0.346018	0.562956	0.887211	-0.168753	-0.0100821
266.24	0.738261	-0.382037	0.789597	0.539353	0.42143	-1.14879	-0.754365	-0.111118	0.68557	-0.0425126	0.328404	0.271189	0.567246	0.188647	0.839248	-0.0511341	0.340046	-0.36308	0.545006	0.876749	-0.167619	-0.0325083
266.72	0.662476	-0.392789	0.832281	0.528884	0.407133	-1.17223	-0.702194	-0.0830059	0.709183	-0.0987261	0.412443	0.299341	0.567242	0.180276	0.825075	-0.0653992	0.366086	-0.38153	0.522527	0.865235	-0.155503	-0.050766
267.2	0.583126	-0.392318	0.87058	0.516417	0.397366	-1.1665	-0.645062	-0.0633107	0.725682	-0.136362	0.48485	0.342889	0.569114	0.164552	0.816494	-0.0730621	0.390468	-0.401172	0.495887	0.852639	-0.140779	-0.0648609
267.68	0.502348	-0.380218	0.903263	0.509166	0.390401	-1.16118	-0.593388	-0.0542109	0.730266	-0.140761	0.561865	0.399237	0.578405	0.142419	0.812184	-0.0832428	0.412046	-0.416963	0.465625	0.838328	-0.129105	-0.0747252
268.16	0.432178	-0.363933	0.931626	0.515744	0.380228	-1.19148	-0.550745	-0.0518864	0.722499	-0.109952	0.649482	0.458033	0.59674	0.114976	0.805778	-0.0985524	0.427778	-0.423211	0.431079	0.820203	-0.124203	-0.0805815
268.64	0.388739	-0.350115	0.956454	0.535499	0.36344	-1.26511	-0.513691	-0.0499718	0.702369	-0.0579048	0.734992	0.5088	0.619412	0.085394	0.794073	-0.114588	0.433053	-0.414175	0.39363	0.799974	-0.12422	-0.0823501
269.12	0.383692	-0.342436	0.98258	0.562042	0.336128	-1.36023	-0.475339	-0.0406344	0.669991	-0.00355614	0.79404	0.546532	0.63732	0.0563095	0.778459	-0.120825	0.425724	-0.39102	0.35506	0.778894	-0.126866	-0.0793767
269.6	0.413309	-0.342915	1.01165	0.584933	0.301786	-1.4332	-0.432033	-0.0216166	0.620136	0.0352883	0.816298	0.57251	0.643578	0.0294114	0.765666	-0.105453	0.407302	-0.362995	0.320906	0.758412	-0.131559	-0.0718913
270.08	0.464822	-0.352853	1.03802	0.595571	0.266934	-1.45851	-0.383244	0.00414352	0.549841	0.0534445	0.808447	0.593467	0.636345	0.00606723	0.757659	-0.0670842	0.385134	-0.341879	0.297588	0.738168	-0.134354	-0.0612933
270.56	0.512891	-0.371498	1.05434	0.589734	0.238252	-1.43882	-0.336067	0.0292815	0.464878	0.0551867	0.790485	0.614825	0.619857	-0.0128921	0.755377	-0.0163407	0.368423	-0.337315	0.286258	0.715624	-0.13374	-0.0512252
271.04	0.541478	-0.39883	1.05407	0.570954	0.22497	-1.41181	-0.294493	0.0449657	0.379216	0.0516204	0.780192	0.639331	0.600869	-0.0242924	0.755344	0.0269048	0.363656	-0.349412	0.284755	0.689721	-0.126102	-0.0447988
271.52	0.552081	-0.433158	1.03757	0.542538	0.226856	-1.4183	-0.255709	0.0462439	0.309364	0.0503582	0.77951	0.666609	0.582833	-0.0240385	0.754464	0.0474815	0.371434	-0.368508	0.283998	0.661132	-0.105098	-0.0430436
272	0.548636	-0.474241	1.01737	0.511346	0.239471	-1.47044	-0.215733	0.0344825	0.267668	0.0541639	0.780726	0.690456	0.565797	-0.00898117	0.753563	0.0422099	0.385312	-0.381226	0.275213	0.633719	-0.0727703	-0.0453198
272.48	0.542026	-0.521155	1.00722	0.483388	0.254852	-1.55239	-0.173053	0.0165982	0.24784	0.0589195	0.769818	0.706111	0.548306	0.0223398	0.757566	0.0217211	0.395379	-0.379147	0.252448	0.610524	-0.0319237	-0.0496034
272.96	0.540559	-0.570986	1.01374	0.464129	0.263067	-1.62696	-0.129314	4.46717e-05	0.236344	0.0602165	0.745314	0.710067	0.529627	0.0676217	0.764812	0.00220207	0.392813	-0.365197	0.218985	0.592861	0.0105359	-0.0550499
273.44	0.548449	-0.621957	1.03371	0.458995	0.261107	-1.66093	-0.0911338	-0.0114627	0.219809	0.0569687	0.720888	0.698087	0.508539	0.11887	0.77588	-0.00778682	0.375153	-0.350381	0.180617	0.578377	0.0507381	-0.0605488
273.92	0.570886	-0.667967	1.05763	0.45862	0.252272	-1.64552	-0.0636806	-0.0188079	0.192857	0.052654	0.723749	0.671716	0.485631	0.169872	0.787844	-0.00783022	0.344049	-0.34529	0.143065	0.562655	0.0888563	-0.0656279
274.4	0.61055	-0.702647	1.07135	0.455043	0.238734	-1.59019	-0.041364	-0.0249575	0.169768	0.0545492	0.768342	0.635025	0.461779	0.211345	0.797955	-0.00848408	0.307154	-0.353167	0.109387	0.542023	0.127004	-0.0696946
274.88	0.66229	-0.724614	1.0755	0.440625	0.228362	-1.51531	-0.0142339	-0.0324833	0.166531	0.0620528	0.852478	0.602258	0.438995	0.237793	0.805176	-0.0162377	0.270833	-0.368095	0.0774412	0.518786	0.164263	-0.074558
275.36	0.715544	-0.73356	1.07708	0.417008	0.221804	-1.43815	0.0312999	-0.041302	0.18794	0.0754818	0.957761	0.584741	0.42025	0.247294	0.808045	-0.0302746	0.238939	-0.38097	0.0476731	0.495298	0.199588	-0.0798221
275.84	0.75574	-0.733504	1.08568	0.393746	0.22256	-1.36949	0.0962123	-0.0474732	0.219521	0.089362	1.06292	0.591054	0.407261	0.242909	0.805403	-0.0424241	0.214515	-0.387465	0.0194887	0.475385	0.228897	-0.0855379
276.32	0.773729	-0.726896	1.10582	0.382395	0.229452	-1.31801	0.170752	-0.0480115	0.239927	0.0995513	1.14999	0.616075	0.400163	0.232918	0.793066	-0.0456064	0.200587	-0.389399	-0.00284694	0.461426	0.247141	-0.0913183
276.8	0.77836	-0.718285	1.13466	0.389165	0.240508	-1.28714	0.240264	-0.0415155	0.234503	0.106876	1.2147	0.64817	0.396295	0.22577	0.769392	-0.0405913	0.199513	-0.39373	-0.0165469	0.452572	0.256579	-0.095674
277.28	0.787232	-0.713662	1.16691	0.408015	0.251518	-1.27596	0.297161	-0.0312506	0.205876	0.115958	1.25986	0.668884	0.392493	0.226182	0.736156	-0.0326752	0.212356	-0.404529	-0.0202115	0.446945	0.260758	-0.0981854
277.76	0.824535	-0.715383	1.19748	0.430187	0.259953	-1.27704	0.343596	-0.0211633	0.174813	0.129951	1.28517	0.671504	0.386091	0.230393	0.697104	-0.0313173	0.233801	-0.418754	-0.0178071	0.444357	0.263183	-0.100112
278.24	0.900036	-0.729039	1.22432	0.451092	0.259682	-1.28747	0.388586	-0.0136402	0.163316	0.146921	1.29361	0.655895	0.376954	0.230845	0.657997	-0.0388281	0.254185	-0.429849	-0.0141266	0.444266	0.2658	-0.101491
278.72	0.998384	-0.756112	1.2479	0.472297	0.249422	-1.30392	0.439946	-0.0089927	0.174065	0.164188	1.28331	0.635605	0.367638	0.217063	0.618243	-0.0499276	0.264818	-0.432488	-0.0145548	0.444169	0.26889	-0.105011
279.2	1.09338	-0.789882	1.26622	0.500978	0.228269	-1.32467	0.4986	-0.00548487	0.194376	0.174263	1.264	0.625101	0.359583	0.18535	0.575094	-0.0563424	0.261845	-0.428586	-0.0202765	0.442039	0.267986	-0.110748
279.68	1.15525	-0.822576	1.27378	0.537883	0.199879	-1.34248	0.557644	-0.00135374	0.208179	0.174241	1.24341	0.628246	0.354233	0.139433	0.524843	-0.0572485	0.248585	-0.422096	-0.0294801	0.437191	0.262186	-0.117898
280.16	1.17015	-0.844873	1.26751	0.579903	0.167668	-1.35152	0.610136	0.00373068	0.206092	0.165888	1.23226	0.63936	0.351642	0.0909019	0.469539	-0.0560491	0.232428	-0.416321	-0.0386625	0.429041	0.250254	-0.125198
280.64	1.14519	-0.856558	1.24792	0.618203	0.136408	-1.34494	0.655678	0.00970131	0.199698	0.154102	1.22953	0.644534	0.351069	0.0502578	0.414288	-0.054575	0.219259	-0.407799	-0.0472993	0.422015	0.228996	-0.131512
281.12	1.10719	-0.85798	1.22099	0.638514	0.108769	-1.32049	0.697732	0.015736	0.207499	0.142406	1.22685	0.631469	0.352183	0.0249554	0.370691	-0.0561146	0.211403	-0.390365	-0.0570499	0.420637	0.197235	-0.137972
281.6	1.07912	-0.853907	1.19412	0.637158	0.0851	-1.28048	0.742687	0.0215858	0.236168	0.131768	1.20161	0.596967	0.353936	0.0143914	0.344328	-0.0598067	0.207622	-0.359347	-0.0700202	0.429016	0.157219	-0.144509
282.08	1.07319	-0.848461	1.16995	0.620439	0.0663051	-1.23162	0.79099	0.027753	0.278816	0.116094	1.14443	0.54856	0.353854	0.0132655	0.33636	-0.0637068	0.208922	-0.317532	-0.08832	0.445952	0.111011	-0.152743
282.56	1.07821	-0.84174	1.14799	0.595642	0.0549962	-1.18216	0.834385	0.033531	0.31664	0.0926366	1.06281	0.496494	0.350278	0.0143544	0.340427	-0.0687719	0.22031	-0.272634	-0.107488	0.470235	0.0621785	-0.160117
283.04	1.07702	-0.832319	1.12418	0.569748	0.0491387	-1.14225	0.864312	0.0369334	0.333395	0.0604487	0.974182	0.450468	0.343142	0.0122642	0.349361	-0.0782221	0.247372	-0.234745	-0.12446	0.497107	0.01251	-0.163511
283.52	1.04452	-0.816759	1.09561	0.540078	0.0495652	-1.12293	0.874906	0.0365476	0.329989	0.0245634	0.908437	0.417419	0.333529	0.00484388	0.356943	-0.0944221	0.292333	-0.208118	-0.136395	0.525195	-0.0326462	-0.160811
284	0.974383	-0.797026	1.06023	0.50297	0.0500527	-1.13724	0.869353	0.032095	0.321197	-0.00401648	0.884345	0.398161	0.325007	-0.00629936	0.360705	-0.109456	0.351305	-0.192797	-0.141642	0.554218	-0.0730503	-0.152554
284.48	0.879168	-0.772626	1.02028	0.455162	0.0428656	-1.19032	0.85486	0.0263809	0.323923	-0.0162577	0.900909	0.39113	0.320602	-0.0160214	0.359578	-0.114157	0.414259	-0.184033	-0.141383	0.583467	-0.10666	-0.143165
284.96	0.788717	-0.747202	0.978427	0.393725	0.0222114	-1.27166	0.841483	0.0229699	0.349297	-0.00809469	0.944934	0.395325	0.321776	-0.0187939	0.353595	-0.100419	0.468936	-0.179966	-0.137564	0.610515	-0.13605	-0.137404
285.44	0.72671	-0.722611	0.936138	0.318709	-0.0144621	-1.35712	0.833935	0.0237964	0.394919	0.017605	0.993541	0.407089	0.328491	-0.0115408	0.344713	-0.069424	0.506066	-0.178918	-0.128511	0.630844	-0.161727	-0.137557
285.92	0.70557	-0.70283	0.898472	0.236998	-0.0571049	-1.42572	0.83235	0.0266984	0.454469	0.0519724	1.03276	0.423756	0.339961	0.00182925	0.33468	-0.0299552	0.522996	-0.180168	-0.1143	0.641965	-0.186662	-0.140193
286.4	0.71654	-0.689578	0.867341	0.155225	-0.0963845	-1.47345	0.831719	0.0269557	0.517022	0.0839661	1.05243	0.441333	0.3543	0.0140231	0.326534	0.00593722	0.521647	-0.180782	-0.094148	0.642674	-0.2156	-0.141683
286.88	0.730213	-0.686022	0.848595	0.0843386	-0.123833	-1.51912	0.826074	0.020551	0.576399	0.10455	1.05378	0.458229	0.367909	0.0168742	0.320804	0.0333269	0.507162	-0.177104	-0.071553	0.637462	-0.248871	-0.13509
287.36	0.730883	-0.691114	0.844088	0.0354591	-0.138507	-1.58988	0.809368	0.00850649	0.630558	0.110606	1.0397	0.474799	0.378739	0.00554145	0.31553	0.0532777	0.486599	-0.16816	-0.0519006	0.632447	-0.285414	-0.119907
287.84	0.713538	-0.704356	0.853009	0.0119821	-0.14948	-1.69773	0.780415	-0.00470411	0.673956	0.103614	1.0127	0.489883	0.3832	-0.0164035	0.302927	0.0723919	0.466045	-0.155159	-0.0401432	0.630114	-0.32398	-0.0996897
288.32	0.697688	-0.722659	0.871827	0.0118389	-0.164224	-1.82395	0.741886	-0.0130417	0.706223	0.0890842	0.973129	0.504077	0.381183	-0.0393882	0.278841	0.0962103	0.448373	-0.142536	-0.0383865	0.63194	-0.360512	-0.0794748
288.8	0.702424	-0.739871	0.893869	0.0246378	-0.18678	-1.92635	0.700712	-0.0137688	0.728656	0.0717396	0.926437	0.514102	0.373893	-0.052821	0.241911	0.123897	0.433454	-0.133185	-0.0452008	0.635506	-0.393432	-0.0646857
289.28	0.735113	-0.750883	0.913585	0.0383314	-0.212623	-1.97113	0.666096	-0.00881666	0.747186	0.0538332	0.878985	0.516427	0.364574	-0.0527292	0.198045	0.151777	0.417999	-0.126478	-0.055455	0.639978	-0.422573	-0.0563831
289.76	0.780711	-0.754602	0.922864	0.0477923	-0.234073	-1.95515	0.646187	-0.00241036	0.767813	0.0346741	0.840061	0.509185	0.357021	-0.0432481	0.157308	0.175026	0.398793	-0.120625	-0.0655982	0.642256	-0.446224	-0.0542257
290.24	0.818005	-0.752527	0.917992	0.0561006	-0.249262	-1.90999	0.644772	0.00213102	0.787642	0.0125031	0.811587	0.498294	0.353629	-0.0329508	0.124354	0.195143	0.376628	-0.115967	-0.0756696	0.641955	-0.462236	-0.0564276
290.72	0.837236	-0.7477	0.900275	0.0728789	-0.265547	-1.88227	0.656668	0.00373634	0.797955	-0.00973475	0.799135	0.490318	0.355525	-0.0299857	0.0982069	0.214177	0.353188	-0.113893	-0.0873106	0.639212	-0.466792	-0.0607139
291.2	0.844068	-0.742402	0.874204	0.105707	-0.289596	-1.90212	0.671569	0.00415965	0.788273	-0.0297981	0.808996	0.496251	0.363559	-0.0385517	0.0761239	0.234719	0.332928	-0.117964	-0.103653	0.633335	-0.462026	-0.0646782
291.68	0.859484	-0.740163	0.852243	0.153816	-0.325947	-1.96978	0.682496	0.00487018	0.758636	-0.0440916	0.848833	0.517661	0.375779	-0.0576327	0.0530788	0.253169	0.319174	-0.128256	-0.127506	0.625802	-0.452676	-0.0656111
292.16	0.895278	-0.741071	0.841738	0.207881	-0.369968	-2.06116	0.688411	0.00586082	0.721411	-0.0545032	0.920566	0.55445	0.389189	-0.0808068	0.0312505	0.265892	0.313154	-0.13981	-0.157013	0.61834	-0.443928	-0.0619828
292.64	0.949555	-0.747573	0.846885	0.257628	-0.410086	-2.14296	0.696821	0.00501921	0.700769	-0.0644638	1.01324	0.595576	0.398444	-0.0982606	0.0156532	0.268016	0.314949	-0.148008	-0.18929	0.613088	-0.435479	-0.0549885
293.12	1.00474	-0.758852	0.863997	0.297542	-0.435875	-2.19603	0.715648	0.00134262	0.715963	-0.082175	1.10587	0.630011	0.400104	-0.0953373	0.0144511	0.260666	0.323662	-0.149864	-0.220151	0.609757	-0.423	-0.0476772
293.6	1.04413	-0.768142	0.888501	0.329061	-0.447841	-2.21786	0.750347	-0.00268661	0.770258	-0.110611	1.17442	0.650944	0.393764	-0.0589379	0.032908	0.251833	0.33959	-0.148395	-0.245737	0.604564	-0.403974	-0.0464486
294.08	1.06739	-0.77494	0.913354	0.355836	-0.453331	-2.21347	0.795513	-0.00349869	0.848407	-0.146008	1.20441	0.652454	0.38249	0.0140417	0.0669383	0.248099	0.359618	-0.148988	-0.261756	0.594326	-0.375969	-0.0558464
294.56	1.08832	-0.779111	0.937316	0.378296	-0.464706	-2.19497	0.839544	0.00186225	0.926693	-0.182548	1.1925	0.633995	0.371414	0.109691	0.112285	0.255203	0.379573	-0.155713	-0.268011	0.578471	-0.345334	-0.0753087
295.04	1.12012	-0.7802	0.966372	0.394947	-0.48653	-2.16489	0.872106	0.0143242	0.982198	-0.211985	1.15813	0.598126	0.365868	0.202212	0.16124	0.271309	0.393245	-0.166359	-0.263944	0.561392	-0.320403	-0.10102
295.52	1.15488	-0.778466	1.00532	0.402644	-0.51634	-2.1279	0.890585	0.0309378	1.00104	-0.228323	1.12537	0.550046	0.367865	0.264365	0.21277	0.29022	0.398119	-0.175315	-0.253365	0.551476	-0.305675	-0.126626
296	1.1727	-0.776041	1.05854	0.400245	-0.550755	-2.08721	0.901428	0.0484907	0.984213	-0.230261	1.11197	0.496882	0.377062	0.284484	0.266198	0.306828	0.396122	-0.178405	-0.238679	0.554282	-0.301144	-0.146932
296.48	1.14628	-0.77199	1.12328	0.394389	-0.580865	-2.04337	0.913127	0.0639652	0.940867	-0.221169	1.12494	0.4465	0.389138	0.272339	0.319523	0.314793	0.394677	-0.174076	-0.222502	0.570504	-0.299732	-0.162762
296.96	1.06781	-0.76745	1.18965	0.396997	-0.607426	-2.00261	0.931291	0.0779655	0.882143	-0.208465	1.1544	0.406782	0.401977	0.254993	0.371502	0.311374	0.402493	-0.166559	-0.204869	0.594637	-0.296342	-0.176415
297.44	0.956471	-0.760496	1.24608	0.4175	-0.628198	-1.97111	0.954527	0.0914725	0.827105	-0.196142	1.18831	0.384204	0.414595	0.25489	0.414363	0.299428	0.421681	-0.161002	-0.183623	0.61756	-0.288724	-0.189331
297.92	0.851468	-0.753089	1.28448	0.458371	-0.647464	-1.95745	0.975636	0.104256	0.79376	-0.186336	1.21251	0.38559	0.428384	0.276709	0.444375	0.283315	0.449926	-0.159413	-0.15902	0.632813	-0.285285	-0.200366
298.4	0.787147	-0.745593	1.30124	0.509478	-0.662286	-1.97348	0.9894	0.11383	0.797108	-0.180202	1.2304	0.410699	0.443947	0.305059	0.459989	0.266475	0.479044	-0.16192	-0.131153	0.639032	-0.290728	-0.207159
298.88	0.774062	-0.735599	1.29954	0.562939	-0.675044	-2.02485	0.997176	0.115988	0.84353	-0.175239	1.25289	0.455473	0.458993	0.321265	0.465227	0.252715	0.503941	-0.168072	-0.102032	0.639355	-0.309493	-0.209018
299.36	0.797867	-0.721773	1.28428	0.611274	-0.687138	-2.10765	1.00682	0.107944	0.925579	-0.172923	1.295	0.512858	0.471276	0.313544	0.465601	0.243143	0.522368	-0.177171	-0.0719724	0.638111	-0.336721	-0.210913
299.84	0.832615	-0.702757	1.26002	0.655185	-0.703791	-2.20528	1.02524	0.0898597	1.02878	-0.170895	1.36117	0.570695	0.479002	0.287547	0.462027	0.242797	0.538661	-0.189261	-0.0425813	0.637831	-0.365096	-0.217873
300.32	0.858062	-0.678655	1.22984	0.700855	-0.728853	-2.2954	1.05339	0.0672388	1.12982	-0.170549	1.44369	0.620366	0.481636	0.258576	0.452866	0.252835	0.558667	-0.205905	-0.0137193	0.640401	-0.389039	-0.232208
300.8	0.866177	-0.652405	1.19373	0.758618	-0.762337	-2.35941	1.08186	0.0481145	1.21839	-0.171642	1.51843	0.657922	0.481974	0.240076	0.434806	0.269564	0.586531	-0.22727	0.0140845	0.64329	-0.409631	-0.251633
301.28	0.86392	-0.628987	1.15529	0.82676	-0.797133	-2.39976	1.10039	0.0402451	1.28934	-0.172944	1.56172	0.686268	0.483697	0.237486	0.406628	0.290199	0.622119	-0.252233	0.0394824	0.64478	-0.426158	-0.265533
301.76	0.856989	-0.615076	1.126	0.899092	-0.825814	-2.4364	1.10639	0.0471415	1.34458	-0.175779	1.55878	0.707305	0.487762	0.247328	0.370812	0.307467	0.662193	-0.279241	0.0623643	0.643467	-0.442746	-0.267334
302.24	0.847012	-0.617862	1.11566	0.957271	-0.845183	-2.4975	1.09971	0.0666983	1.38562	-0.184166	1.5153	0.722585	0.492503	0.264086	0.337368	0.319251	0.703825	-0.307264	0.0823505	0.639576	-0.458103	-0.25656
302.72	0.834361	-0.641158	1.12908	0.986239	-0.853904	-2.59187	1.09209	0.0921983	1.4111	-0.202859	1.44943	0.730725	0.493285	0.272793	0.312641	0.322726	0.74306	-0.335697	0.0996914	0.63236	-0.470127	-0.240916
303.2	0.821522	-0.681549	1.16104	0.987603	-0.855333	-2.70581	1.08702	0.115694	1.41333	-0.234428	1.38722	0.730887	0.487184	0.256162	0.297328	0.323564	0.778144	-0.362251	0.113378	0.622659	-0.478734	-0.228429
303.68	0.816819	-0.73096	1.19606	0.964158	-0.856319	-2.80285	1.08329	0.131474	1.38835	-0.277567	1.3355	0.720973	0.473889	0.197882	0.28565	0.321615	0.806057	-0.387505	0.12427	0.610455	-0.486005	-0.223947
304.16	0.828545	-0.783435	1.22061	0.937109	-0.859008	-2.84648	1.07308	0.138426	1.33794	-0.327078	1.28674	0.704695	0.457015	0.0932695	0.271195	0.321595	0.823803	-0.412744	0.132783	0.598277	-0.49186	-0.224477
304.64	0.858681	-0.830141	1.22447	0.915606	-0.863236	-2.8263	1.05161	0.139143	1.27675	-0.373096	1.22403	0.684309	0.441912	-0.0394563	0.250578	0.323774	0.829257	-0.437502	0.139509	0.58724	-0.495177	-0.221516
305.12	0.904051	-0.860836	1.21267	0.903051	-0.866021	-2.76401	1.02353	0.136586	1.22258	-0.408018	1.1415	0.663379	0.432816	-0.163431	0.227673	0.327516	0.823291	-0.458425	0.144788	0.578077	-0.490019	-0.209922
305.6	0.953463	-0.881069	1.19936	0.898508	-0.865683	-2.69776	0.999684	0.132401	1.18728	-0.42846	1.04259	0.641976	0.428628	-0.238038	0.207861	0.332323	0.806515	-0.472398	0.14835	0.569149	-0.471904	-0.190913
306.08	0.998407	-0.888033	1.19699	0.89348	-0.861132	-2.66085	0.989242	0.126048	1.17376	-0.435933	0.940623	0.619527	0.426602	-0.244251	0.194219	0.337607	0.782756	-0.476627	0.148625	0.558619	-0.441555	-0.171009
306.56	1.03744	-0.891536	1.20712	0.881304	-0.85291	-2.65532	0.993675	0.116081	1.17748	-0.43428	0.845626	0.596642	0.42275	-0.195401	0.186046	0.340336	0.756636	-0.473289	0.145474	0.546582	-0.404866	-0.156974
307.04	1.06372	-0.891995	1.22653	0.865849	-0.845127	-2.66001	1.002	0.10267	1.18874	-0.427163	0.759843	0.572442	0.413079	-0.128366	0.175744	0.336664	0.731496	-0.46842	0.137113	0.533374	-0.368097	-0.148503
307.52	1.07546	-0.889914	1.24836	0.852466	-0.839398	-2.64899	1.00219	0.0891105	1.20594	-0.419823	0.673864	0.544579	0.397382	-0.0805574	0.161679	0.326234	0.709608	-0.46782	0.125143	0.521547	-0.339767	-0.142858
308	1.07034	-0.891556	1.26983	0.8438	-0.835889	-2.6141	0.988935	0.0800352	1.22877	-0.416951	0.588561	0.508761	0.376891	-0.0651542	0.142592	0.3109	0.691213	-0.472153	0.110773	0.514361	-0.314907	-0.136253
308.48	1.05922	-0.889411	1.29447	0.834654	-0.832444	-2.56725	0.969081	0.079285	1.25997	-0.425867	0.51075	0.461381	0.354106	-0.0682586	0.125626	0.29484	0.674801	-0.474228	0.0935356	0.513155	-0.286778	-0.126933
308.96	1.05669	-0.88657	1.32557	0.821781	-0.823098	-2.53221	0.956858	0.0860868	1.29579	-0.44673	0.455912	0.400901	0.332341	-0.0668984	0.112544	0.284686	0.658584	-0.465347	0.0700063	0.514947	-0.249446	-0.119071
309.44	1.07996	-0.88255	1.36307	0.797616	-0.803718	-2.5278	0.962094	0.0961118	1.33254	-0.475113	0.436385	0.333853	0.313847	-0.0492748	0.102443	0.284197	0.641373	-0.440114	0.0382824	0.516057	-0.204399	-0.117247
309.92	1.13008	-0.882938	1.40262	0.7615	-0.773361	-2.54874	0.981489	0.103071	1.36354	-0.501389	0.453011	0.271276	0.300346	-0.0225674	0.0904613	0.288865	0.625636	-0.402679	-0.00380668	0.51373	-0.15799	-0.120257
310.4	1.19552	-0.891166	1.43301	0.716413	-0.733623	-2.5749	0.997531	0.103013	1.38458	-0.517924	0.480471	0.223471	0.293314	-0.00672483	0.0740109	0.293509	0.614681	-0.360798	-0.0524907	0.505588	-0.11844	-0.125929
310.88	1.25819	-0.914772	1.45244	0.672942	-0.686234	-2.57584	0.994988	0.0966114	1.39817	-0.524729	0.494823	0.197521	0.293523	-0.0166061	0.0537081	0.291255	0.612007	-0.323165	-0.102132	0.494362	-0.0896169	-0.129154
311.36	1.31058	-0.948971	1.45995	0.633979	-0.634163	-2.53579	0.966376	0.0878994	1.40692	-0.530564	0.47772	0.188835	0.300267	-0.0524828	0.0349107	0.277461	0.617384	-0.292403	-0.145685	0.484601	-0.0682562	-0.129002
311.84	1.36026	-0.988362	1.46184	0.605579	-0.582789	-2.44992	0.924601	0.0815152	1.41133	-0.543166	0.435471	0.187932	0.30964	-0.099744	0.0224781	0.251827	0.625353	-0.265759	-0.178371	0.48112	-0.0490171	-0.12798
312.32	1.42722	-1.0267	1.4626	0.594566	-0.534909	-2.32741	0.885644	0.0791748	1.41028	-0.563562	0.391923	0.185574	0.316699	-0.142937	0.0173333	0.21909	0.629379	-0.240259	-0.200218	0.484987	-0.0271637	-0.132299
312.8	1.51813	-1.06182	1.46469	0.60138	-0.494651	-2.18934	0.861038	0.0778744	1.39891	-0.580402	0.372727	0.173198	0.316998	-0.173446	0.0150214	0.180919	0.62383	-0.216858	-0.215343	0.497728	-0.00246064	-0.143203
313.28	1.62041	-1.093	1.46388	0.618668	-0.466044	-2.06347	0.851891	0.0716531	1.37347	-0.578277	0.387121	0.154033	0.30772	-0.19251	0.0129109	0.145493	0.608904	-0.201357	-0.227156	0.518329	0.0227934	-0.159673
313.76	1.70841	-1.11995	1.45937	0.6394	-0.449756	-1.97066	0.846409	0.0564977	1.32973	-0.550138	0.425911	0.136095	0.289797	-0.205262	0.0089788	0.117544	0.589378	-0.195748	-0.238988	0.543861	0.049023	-0.17532
314.24	1.76009	-1.14008	1.45394	0.654597	-0.444756	-1.92789	0.837919	0.0337435	1.26741	-0.504946	0.46554	0.126861	0.26773	-0.211745	0.00373831	0.0972719	0.572184	-0.198245	-0.251388	0.571487	0.080658	-0.186299
314.72	1.77212	-1.15298	1.4527	0.660256	-0.446025	-1.93787	0.826976	0.00845399	1.1888	-0.459395	0.484635	0.129429	0.246381	-0.210128	-0.000497441	0.083625	0.560467	-0.202113	-0.261987	0.598636	0.117893	-0.189829
315.2	1.75915	-1.1573	1.46107	0.655887	-0.450082	-1.9744	0.817581	-0.0125906	1.10145	-0.42871	0.478398	0.136636	0.228401	-0.195714	-0.0045127	0.0719971	0.55104	-0.203719	-0.269198	0.620057	0.158605	-0.187292
315.68	1.7396	-1.15227	1.47973	0.648737	-0.454538	-2.00404	0.812382	-0.0248524	1.01828	-0.416378	0.450382	0.14118	0.213114	-0.169284	-0.0132716	0.0589286	0.538368	-0.204149	-0.270781	0.631097	0.196416	-0.181631
316.16	1.7193	-1.14132	1.50387	0.640678	-0.458949	-2.00073	0.806421	-0.0276632	0.953367	-0.413098	0.415502	0.135228	0.198983	-0.135198	-0.0270195	0.0427375	0.518884	-0.208634	-0.266079	0.632125	0.224484	-0.175442
316.64	1.68782	-1.12694	1.52372	0.631539	-0.464333	-1.95907	0.787938	-0.0228086	0.918424	-0.40778	0.383824	0.117473	0.188132	-0.101573	-0.0439426	0.0260793	0.495249	-0.223108	-0.25689	0.623638	0.239256	-0.16934
317.12	1.63863	-1.11307	1.53823	0.61872	-0.470907	-1.897	0.74997	-0.012545	0.913623	-0.395939	0.362799	0.0944678	0.18406	-0.0747571	-0.0613125	0.0129493	0.475995	-0.246755	-0.246368	0.610426	0.243586	-0.163994
317.6	1.56903	-1.10103	1.54884	0.598918	-0.476296	-1.84779	0.699197	0.00206486	0.927587	-0.384276	0.345891	0.0735727	0.190009	-0.05667	-0.0758557	0.00664468	0.469653	-0.273176	-0.237801	0.597727	0.246893	-0.159199
318.08	1.48853	-1.09207	1.5611	0.569292	-0.481533	-1.8394	0.652233	0.0216331	0.943169	-0.3821	0.323377	0.060274	0.204765	-0.0466146	-0.0846581	0.00604559	0.478271	-0.294385	-0.234755	0.588964	0.254993	-0.155911
318.56	1.40677	-1.08675	1.58213	0.529178	-0.484115	-1.87924	0.625221	0.0450506	0.945198	-0.390082	0.286408	0.052377	0.221441	-0.0410412	-0.0879682	0.0101588	0.497065	-0.305636	-0.236088	0.583169	0.269453	-0.154144
319.04	1.32762	-1.08187	1.61189	0.486634	-0.486955	-1.94934	0.623377	0.0709935	0.929945	-0.399392	0.230345	0.0470715	0.232284	-0.0377212	-0.0840897	0.0174074	0.513498	-0.307992	-0.240067	0.578242	0.289034	-0.154501
319.52	1.25117	-1.0687	1.64629	0.443665	-0.490876	-2.02281	0.635208	0.0975534	0.898595	-0.396884	0.159234	0.0461608	0.232561	-0.0325019	-0.0678331	0.0242197	0.518278	-0.307345	-0.244718	0.569939	0.30739	-0.157262
320	1.17453	-1.04018	1.68182	0.402681	-0.499423	-2.07721	0.64072	0.121328	0.855177	-0.379524	0.0891753	0.0518569	0.224948	-0.0219499	-0.0367865	0.0298138	0.506081	-0.308487	-0.24809	0.556702	0.322542	-0.160704
320.48	1.10267	-0.993198	1.71447	0.358735	-0.515279	-2.10368	0.62432	0.140749	0.801267	-0.354077	0.0341556	0.0694645	0.218279	-0.00370283	0.0114615	0.0330519	0.479859	-0.313534	-0.249718	0.538676	0.332887	-0.163208
320.96	1.04815	-0.930271	1.74475	0.309305	-0.540141	-2.10943	0.586162	0.154142	0.738261	-0.331435	0.00713247	0.0969389	0.217362	0.0224376	0.0684478	0.0309497	0.447014	-0.322797	-0.249587	0.517154	0.339234	-0.162062
321.44	1.01837	-0.868146	1.7732	0.254684	-0.57378	-2.11223	0.535672	0.160498	0.665515	-0.315763	0.0101942	0.125544	0.223419	0.0535228	0.124406	0.0219382	0.415613	-0.334242	-0.245994	0.492437	0.343522	-0.158368
321.92	1.00949	-0.819915	1.79603	0.201462	-0.610962	-2.11908	0.48678	0.160781	0.586754	-0.302921	0.0405887	0.148527	0.231875	0.0876086	0.171718	0.0071793	0.389966	-0.347286	-0.23702	0.465717	0.346125	-0.153086
322.4	1.01281	-0.789855	1.80541	0.161669	-0.646659	-2.12824	0.45313	0.156554	0.50679	-0.286223	0.0933247	0.161603	0.237844	0.123083	0.20839	-0.0133639	0.364846	-0.360599	-0.221462	0.438754	0.346055	-0.14883
322.88	1.01896	-0.7782	1.79771	0.143876	-0.673675	-2.13007	0.439466	0.149913	0.430468	-0.264507	0.155828	0.172447	0.239093	0.162379	0.236449	-0.0356052	0.351611	-0.373249	-0.198231	0.412011	0.340714	-0.144619
323.36	1.02285	-0.776341	1.7706	0.154708	-0.686567	-2.11238	0.445838	0.143802	0.359273	-0.24653	0.224429	0.192691	0.237458	0.209668	0.261005	-0.0588072	0.344477	-0.381684	-0.1688	0.389402	0.330351	-0.138283
323.84	1.02007	-0.775367	1.72979	0.191005	-0.685079	-2.07728	0.466818	0.139668	0.295452	-0.241971	0.294874	0.226738	0.236057	0.265817	0.287809	-0.084299	0.341209	-0.384399	-0.13537	0.371858	0.314518	-0.12727
324.32	1.01219	-0.773455	1.684	0.238076	-0.674356	-2.03483	0.495615	0.137301	0.240208	-0.25208	0.361281	0.268039	0.236541	0.326361	0.318887	-0.110565	0.340941	-0.380208	-0.100523	0.357532	0.293721	-0.11134
324.8	0.993267	-0.772455	1.639	0.282017	-0.663145	-2.00083	0.52766	0.135937	0.192738	-0.268161	0.416752	0.298691	0.238752	0.382638	0.357132	-0.134481	0.342774	-0.370368	-0.065844	0.344196	0.268066	-0.0937017
325.28	0.967725	-0.777472	1.59455	0.309935	-0.660046	-1.98711	0.561457	0.13556	0.154524	-0.271524	0.453572	0.306197	0.242661	0.430004	0.402997	-0.151612	0.347621	-0.357989	-0.0329045	0.329022	0.241741	-0.0796216
325.76	0.949163	-0.785904	1.54707	0.319452	-0.667706	-1.99769	0.596389	0.136869	0.128267	-0.248293	0.461789	0.28772	0.247762	0.46454	0.452688	-0.156691	0.356254	-0.349592	-0.00257649	0.313471	0.216066	-0.0734933
326.24	0.948679	-0.791923	1.49268	0.315669	-0.682729	-2.0242	0.637677	0.141671	0.113427	-0.199295	0.443883	0.255957	0.255603	0.488473	0.49703	-0.147218	0.368974	-0.350169	0.0238365	0.301464	0.195807	-0.0774783
326.72	0.969223	-0.790561	1.43229	0.307182	-0.700071	-2.0599	0.687847	0.150876	0.112453	-0.133896	0.409831	0.227242	0.266219	0.505439	0.524101	-0.128037	0.384287	-0.361478	0.0478705	0.297076	0.187625	-0.0913751
327.2	0.997887	-0.777928	1.37172	0.302021	-0.716076	-2.0924	0.745044	0.163613	0.126055	-0.0681503	0.373782	0.213904	0.278244	0.517917	0.525682	-0.108989	0.397873	-0.381579	0.0697373	0.300638	0.194942	-0.112393
327.68	1.00862	-0.752674	1.31952	0.302158	-0.728123	-2.11328	0.800765	0.177143	0.152296	-0.0146547	0.352828	0.217446	0.289381	0.523682	0.502168	-0.0970581	0.406115	-0.404007	0.0926082	0.308057	0.221598	-0.137921
328.16	0.978144	-0.71898	1.28267	0.3028	-0.736879	-2.1084	0.845005	0.188608	0.179856	0.0252135	0.35564	0.229875	0.298751	0.518926	0.469036	-0.0926013	0.405961	-0.421639	0.117744	0.3135	0.261419	-0.166163
328.64	0.905857	-0.68598	1.26408	0.299414	-0.741658	-2.07002	0.870217	0.196801	0.194387	0.0536857	0.379843	0.241929	0.307971	0.503578	0.441493	-0.0906797	0.39816	-0.430898	0.145475	0.313116	0.309858	-0.193519
329.12	0.808909	-0.660014	1.26489	0.293977	-0.738029	-2.00039	0.879858	0.201428	0.188729	0.0760183	0.412144	0.248231	0.31971	0.480837	0.43008	-0.0834091	0.387344	-0.433014	0.174691	0.306647	0.356685	-0.215827
329.6	0.710359	-0.644771	1.27766	0.286242	-0.724694	-1.91868	0.878944	0.204171	0.166772	0.0985015	0.439352	0.244727	0.334428	0.459367	0.434367	-0.0661013	0.380036	-0.432961	0.20075	0.297015	0.39231	-0.227307
330.08	0.625578	-0.642659	1.29457	0.28982	-0.704438	-1.84959	0.877433	0.206157	0.145917	0.122313	0.455935	0.229699	0.348211	0.444818	0.441844	-0.0433219	0.380691	-0.433994	0.219977	0.286362	0.413169	-0.226935
330.56	0.561488	-0.646753	1.31013	0.309965	-0.684697	-1.81316	0.875094	0.20749	0.145767	0.145515	0.467808	0.200547	0.357522	0.436766	0.441142	-0.0208964	0.391271	-0.439172	0.230062	0.276209	0.420869	-0.216891
331.04	0.509019	-0.649633	1.31912	0.347233	-0.672726	-1.81377	0.865833	0.207296	0.177138	0.164717	0.473329	0.155263	0.360225	0.427135	0.427835	-0.00721782	0.409698	-0.446638	0.233504	0.266871	0.419869	-0.200072
331.52	0.469514	-0.645568	1.32206	0.396003	-0.673299	-1.83426	0.843229	0.205881	0.233816	0.179068	0.472349	0.096229	0.358058	0.405995	0.407972	-0.00282465	0.43018	-0.45322	0.236495	0.258115	0.414976	-0.179624
332	0.45133	-0.637941	1.32211	0.445453	-0.679103	-1.85457	0.805189	0.203348	0.299899	0.189397	0.45367	0.0296399	0.358264	0.368734	0.390492	-0.00653019	0.447071	-0.456295	0.246594	0.249355	0.408966	-0.155767
332.48	0.460423	-0.635902	1.3225	0.484843	-0.682592	-1.86241	0.759609	0.200097	0.365973	0.200413	0.410535	-0.0361896	0.36379	0.319283	0.378622	-0.0142312	0.458987	-0.452468	0.267313	0.241174	0.402197	-0.125633
332.96	0.48481	-0.649627	1.32304	0.503153	-0.674967	-1.85877	0.716405	0.196142	0.432198	0.216338	0.343648	-0.0911224	0.372855	0.267364	0.365418	-0.023689	0.468401	-0.439671	0.298363	0.233126	0.394092	-0.0876544
333.44	0.5043	-0.681142	1.32489	0.504853	-0.657025	-1.84881	0.681645	0.188938	0.505501	0.236406	0.27211	-0.13021	0.379138	0.221018	0.3448	-0.0325007	0.479075	-0.418452	0.333118	0.223433	0.38325	-0.0431639
333.92	0.497533	-0.722376	1.32676	0.498099	-0.636193	-1.83857	0.655689	0.175677	0.59461	0.2539	0.224233	-0.147796	0.375358	0.182941	0.314757	-0.0388473	0.490831	-0.3906	0.36411	0.210132	0.368865	0.0030279
334.4	0.459644	-0.759739	1.32746	0.490775	-0.622557	-1.82425	0.626434	0.15596	0.694872	0.260259	0.219779	-0.146005	0.3608	0.147804	0.280743	-0.0379008	0.498811	-0.360468	0.385737	0.195849	0.353725	0.0426034
334.88	0.410696	-0.778629	1.32686	0.488631	-0.620792	-1.8067	0.585513	0.132402	0.791509	0.254856	0.256765	-0.130336	0.341866	0.11033	0.25218	-0.0321727	0.495918	-0.334114	0.399012	0.181177	0.339445	0.0692193
335.36	0.375504	-0.779309	1.32571	0.489066	-0.628863	-1.80259	0.52698	0.111761	0.871083	0.246712	0.304969	-0.113093	0.327316	0.0694358	0.236119	-0.0262418	0.479407	-0.31547	0.409759	0.169082	0.323584	0.0792747
335.84	0.368353	-0.770073	1.32386	0.485598	-0.641326	-1.83397	0.456055	0.101285	0.928636	0.251881	0.333175	-0.108694	0.325705	0.0321264	0.231883	-0.027359	0.451974	-0.303413	0.42502	0.160558	0.30502	0.0717322
336.32	0.379703	-0.764182	1.32034	0.46843	-0.65326	-1.9197	0.379654	0.103192	0.969279	0.280412	0.322484	-0.126719	0.335565	0.00709219	0.232049	-0.0360524	0.422941	-0.293673	0.448818	0.151119	0.282288	0.0504373
336.8	0.380954	-0.771638	1.31829	0.43844	-0.667173	-2.04835	0.305964	0.114838	0.997661	0.333252	0.276928	-0.165774	0.349538	-0.00226585	0.230236	-0.0496766	0.40068	-0.278914	0.479004	0.137843	0.254272	0.0232665
337.28	0.34845	-0.794178	1.32068	0.398243	-0.686018	-2.18507	0.238203	0.128738	1.01257	0.396128	0.219064	-0.216306	0.35913	-0.00103366	0.22123	-0.0587269	0.387754	-0.255611	0.506956	0.120718	0.225153	-0.00466905
337.76	0.273919	-0.825187	1.33242	0.354089	-0.712253	-2.29298	0.172357	0.136222	1.0068	0.45386	0.174182	-0.265877	0.360883	-0.00338353	0.205001	-0.0564338	0.379953	-0.225831	0.523763	0.10215	0.198448	-0.0301147
338.24	0.165906	-0.855333	1.35597	0.314521	-0.738385	-2.35758	0.104625	0.134638	0.976113	0.496615	0.150518	-0.305868	0.359416	-0.0239179	0.182179	-0.0448497	0.372675	-0.196874	0.526235	0.0890256	0.18178	-0.0413791
338.72	0.0428489	-0.879023	1.39454	0.280238	-0.757555	-2.39376	0.0332195	0.125436	0.925895	0.525759	0.141355	-0.333579	0.361904	-0.0672263	0.153838	-0.0371614	0.364927	-0.175087	0.514654	0.0857707	0.172259	-0.0605141
339.2	-0.0821683	-0.897291	1.44204	0.245498	-0.761096	-2.43345	-0.0394272	0.113129	0.873388	0.551705	0.129758	-0.352632	0.371638	-0.126837	0.120602	-0.0434113	0.358765	-0.163737	0.493422	0.0909238	0.165601	-0.0758715
339.68	-0.200868	-0.916817	1.49414	0.202903	-0.749688	-2.49253	-0.106733	0.10306	0.835746	0.583735	0.107748	-0.364178	0.38635	-0.186527	0.0862226	-0.0668553	0.358008	-0.161305	0.47055	0.10019	0.157835	-0.0871234
340.16	-0.312026	-0.941472	1.54453	0.145124	-0.73372	-2.56673	-0.163199	0.0981508	0.823953	0.625421	0.081378	-0.363845	0.399583	-0.231732	0.0545398	-0.0991952	0.361529	-0.163378	0.448987	0.105881	0.145593	-0.0936991
340.64	-0.411238	-0.969255	1.58983	0.0777442	-0.722609	-2.62419	-0.208536	0.0987848	0.837899	0.674619	0.0655699	-0.346485	0.404869	-0.255088	0.0274418	-0.12828	0.364172	-0.165878	0.429564	0.10467	0.129495	-0.0968608
341.12	-0.485572	-0.994485	1.62682	0.012467	-0.721809	-2.6443	-0.246347	0.10366	0.865128	0.723651	0.0680428	-0.311947	0.402604	-0.259973	0.00336309	-0.147191	0.358812	-0.168402	0.411359	0.0988016	0.114074	-0.099156
341.6	-0.528223	-1.00627	1.65396	-0.0393174	-0.72841	-2.63306	-0.284554	0.110636	0.89084	0.765115	0.0867233	-0.263864	0.397553	-0.25798	-0.0232337	-0.151825	0.343912	-0.17123	0.394229	0.0935978	0.101994	-0.102699
342.08	-0.53526	-0.99989	1.66652	-0.0664312	-0.734031	-2.60842	-0.322077	0.118215	0.903825	0.790977	0.106538	-0.213962	0.39528	-0.262074	-0.0505438	-0.146834	0.324548	-0.176897	0.379166	0.0935099	0.0942683	-0.106351
342.56	-0.511446	-0.979872	1.66167	-0.0715922	-0.730236	-2.59633	-0.359727	0.125496	0.894069	0.795664	0.108927	-0.17458	0.3988	-0.277361	-0.0770899	-0.133727	0.309988	-0.187867	0.369138	0.0983147	0.0919793	-0.106732
343.04	-0.466906	-0.957168	1.64033	-0.0661241	-0.715082	-2.60117	-0.390371	0.132843	0.856919	0.778947	0.0816266	-0.152583	0.403999	-0.30137	-0.0938065	-0.112178	0.304303	-0.202569	0.363649	0.104088	0.0911884	-0.100347
343.52	-0.415632	-0.946296	1.604	-0.064965	-0.696335	-2.61432	-0.408672	0.140124	0.79085	0.7494	0.0271485	-0.147604	0.406481	-0.32524	-0.0961776	-0.0793945	0.305142	-0.217721	0.360869	0.105876	0.0922266	-0.0884602
344	-0.370948	-0.955312	1.56104	-0.0797447	-0.679927	-2.61889	-0.413772	0.147972	0.706658	0.719561	-0.0425318	-0.154795	0.403149	-0.341392	-0.0848678	-0.0375891	0.305925	-0.229479	0.355007	0.0997601	0.0933011	-0.0745748
344.48	-0.349161	-0.981362	1.51868	-0.109145	-0.670684	-2.61465	-0.411443	0.155577	0.617542	0.700893	-0.10996	-0.170239	0.396208	-0.349598	-0.0683198	0.00104366	0.297731	-0.235154	0.342723	0.0884097	0.092088	-0.0643848
344.96	-0.359994	-1.01743	1.48569	-0.146876	-0.666665	-2.61212	-0.412775	0.162153	0.536694	0.69433	-0.15972	-0.18712	0.391799	-0.354321	-0.0608177	0.0279749	0.278904	-0.233164	0.323848	0.075274	0.0877569	-0.0602015
345.44	-0.405321	-1.05454	1.46323	-0.185095	-0.664296	-2.63025	-0.430013	0.166137	0.474347	0.6882	-0.186416	-0.202094	0.39469	-0.364069	-0.0644625	0.0357058	0.253332	-0.226397	0.303206	0.0648666	0.0804701	-0.0600096
345.92	-0.468071	-1.08761	1.4536	-0.220852	-0.662658	-2.67708	-0.465678	0.167732	0.426823	0.668728	-0.183154	-0.210404	0.405628	-0.380897	-0.0776699	0.0240175	0.226672	-0.217845	0.286396	0.059908	0.0728989	-0.0591675
346.4	-0.526642	-1.11802	1.45333	-0.252363	-0.661428	-2.74463	-0.516594	0.167891	0.388157	0.629077	-0.153779	-0.210218	0.419068	-0.401003	-0.0873194	0.000625565	0.2046	-0.210031	0.278406	0.0586409	0.0673221	-0.0550876
346.88	-0.56457	-1.14282	1.46142	-0.283761	-0.663442	-2.80921	-0.573899	0.168859	0.351752	0.573999	-0.102487	-0.197528	0.425417	-0.41614	-0.0832999	-0.0261592	0.189321	-0.203839	0.280319	0.0601014	0.0659777	-0.0487879
347.36	-0.575737	-1.15972	1.47425	-0.315608	-0.664994	-2.85503	-0.62746	0.17305	0.321403	0.520921	-0.041921	-0.170987	0.418022	-0.421968	-0.0641324	-0.0504593	0.181213	-0.196732	0.290956	0.0638733	0.0670463	-0.0444602
347.84	-0.584882	-1.16459	1.4872	-0.341596	-0.660494	-2.87069	-0.670794	0.18044	0.304528	0.483742	0.0169053	-0.131118	0.394198	-0.417041	-0.0345028	-0.0750833	0.17895	-0.186864	0.306327	0.0711278	0.067516	-0.0447309
348.32	-0.610859	-1.15484	1.4958	-0.355563	-0.64583	-2.85892	-0.70087	0.189642	0.309123	0.465339	0.0629805	-0.079847	0.359847	-0.403808	-0.00551661	-0.102713	0.181361	-0.173457	0.322789	0.0836935	0.0670256	-0.0472114
348.8	-0.656417	-1.13645	1.49412	-0.351874	-0.619608	-2.82701	-0.72013	0.199532	0.333831	0.458484	0.0863822	-0.0257884	0.325399	-0.384179	0.0179832	-0.136032	0.185743	-0.157328	0.336302	0.102415	0.0627444	-0.0463863
349.28	-0.708317	-1.11959	1.47741	-0.333267	-0.58539	-2.78723	-0.728802	0.21009	0.368472	0.450039	0.0883706	0.0237921	0.301446	-0.358544	0.037364	-0.171533	0.188999	-0.140263	0.343661	0.125101	0.0563962	-0.0390338
349.76	-0.73696	-1.11266	1.44566	-0.304674	-0.550557	-2.74459	-0.727988	0.223284	0.399779	0.434458	0.0733946	0.0615967	0.294602	-0.327196	0.0533568	-0.203669	0.19087	-0.123808	0.34094	0.14738	0.0520406	-0.0257116
350.24	-0.731839	-1.11391	1.40172	-0.275766	-0.521699	-2.70105	-0.720735	0.239971	0.419132	0.410821	0.0476847	0.0794177	0.302061	-0.293652	0.0713974	-0.22211	0.192781	-0.107416	0.326618	0.164322	0.0491054	-0.0118205
350.72	-0.692083	-1.11562	1.35247	-0.25115	-0.506021	-2.65251	-0.711337	0.261389	0.425503	0.382811	0.0211596	0.0765753	0.316061	-0.264638	0.0905988	-0.223713	0.199605	-0.0909524	0.301765	0.172987	0.0492801	-0.00143385
351.2	-0.642926	-1.10817	1.30111	-0.234436	-0.506462	-2.5915	-0.704778	0.285146	0.427838	0.351202	0.00457932	0.0531918	0.326448	-0.245344	0.109023	-0.210704	0.213616	-0.0759746	0.270146	0.174531	0.0475017	0.00250672
351.68	-0.601958	-1.09434	1.25287	-0.22888	-0.521682	-2.50998	-0.707136	0.308899	0.436215	0.311933	0.00470908	0.0158281	0.325349	-0.236407	0.126513	-0.190729	0.234317	-0.066004	0.239063	0.17203	0.0485351	0.00316197
352.16	-0.563919	-1.08304	1.20853	-0.233886	-0.549606	-2.40467	-0.715199	0.328692	0.4631	0.260986	0.0197168	-0.0283021	0.312743	-0.234418	0.14573	-0.172856	0.2551	-0.0626138	0.216547	0.168435	0.0525882	0.00261948
352.64	-0.509911	-1.08458	1.16395	-0.250005	-0.585134	-2.28065	-0.723148	0.341309	0.507958	0.199905	0.0405264	-0.0692627	0.293552	-0.234429	0.17042	-0.158029	0.270467	-0.0655866	0.205309	0.166106	0.0597203	0.00117939
353.12	-0.415077	-1.0969	1.11872	-0.273367	-0.623047	-2.1475	-0.72368	0.344834	0.567821	0.13407	0.0540667	-0.101814	0.274644	-0.23228	0.198296	-0.142436	0.278396	-0.0703989	0.204153	0.163964	0.0723586	-0.00339535
353.6	-0.279133	-1.11293	1.0683	-0.301335	-0.657169	-2.01445	-0.711562	0.339358	0.632108	0.0730311	0.0525023	-0.121912	0.261726	-0.231032	0.224396	-0.119959	0.281193	-0.0721449	0.207861	0.159911	0.0881389	-0.0129109
354.08	-0.117832	-1.12058	1.01213	-0.325424	-0.680915	-1.891	-0.689067	0.327476	0.69388	0.0252018	0.0330711	-0.129372	0.255366	-0.232522	0.242385	-0.0915809	0.282401	-0.0704841	0.212371	0.154883	0.102582	-0.0267474
354.56	0.0368624	-1.11527	0.947827	-0.345522	-0.694881	-1.77624	-0.665229	0.312712	0.746356	-0.00395226	0.00319984	-0.12344	0.251633	-0.236394	0.25303	-0.0617279	0.284764	-0.068535	0.215179	0.149604	0.111497	-0.04212
355.04	0.161921	-1.10072	0.879724	-0.364218	-0.703429	-1.66589	-0.645613	0.298037	0.783985	-0.0101691	-0.0278715	-0.103517	0.245758	-0.240563	0.26338	-0.0419156	0.28735	-0.0708466	0.217779	0.147867	0.113928	-0.0552974
355.52	0.241181	-1.08551	0.811102	-0.390316	-0.71522	-1.55616	-0.630464	0.285639	0.806929	0.00679766	-0.0522363	-0.066658	0.233137	-0.244068	0.284017	-0.0413045	0.28714	-0.0777948	0.223614	0.153205	0.112798	-0.0638214
356	0.281769	-1.07315	0.74929	-0.434495	-0.735589	-1.44397	-0.615871	0.275391	0.817256	0.0455591	-0.0693027	-0.0115174	0.211974	-0.25084	0.319882	-0.0571597	0.285653	-0.0860954	0.23366	0.165175	0.112444	-0.068911
356.48	0.293099	-1.06436	0.694348	-0.498522	-0.763309	-1.33339	-0.593151	0.266561	0.820441	0.0971954	-0.0769218	0.0596526	0.18428	-0.263758	0.364164	-0.0828079	0.288986	-0.0920907	0.247101	0.178105	0.116325	-0.0726732
356.96	0.278121	-1.05145	0.643202	-0.576494	-0.794843	-1.23559	-0.558361	0.258257	0.824076	0.149575	-0.0778918	0.141678	0.153714	-0.282249	0.404961	-0.107508	0.305686	-0.0955775	0.260312	0.186226	0.126093	-0.0766257
357.44	0.240387	-1.02962	0.589138	-0.645794	-0.820274	-1.15251	-0.513839	0.251209	0.834086	0.191991	-0.0715568	0.224594	0.126258	-0.298602	0.42973	-0.125895	0.340844	-0.103031	0.269565	0.185484	0.139322	-0.0804444
357.92	0.178989	-1.00395	0.527473	-0.691951	-0.835741	-1.09412	-0.464866	0.243352	0.848816	0.219873	-0.0605447	0.300075	0.10617	-0.301667	0.433567	-0.135527	0.390003	-0.121033	0.275102	0.178856	0.153066	-0.0850025
358.4	0.0975717	-0.979647	0.457108	-0.703371	-0.840656	-1.06054	-0.416008	0.233113	0.863138	0.236027	-0.0564002	0.361184	0.0943742	-0.288141	0.423202	-0.13786	0.442112	-0.151208	0.281058	0.172125	0.167021	-0.0902448
358.88	0.0115936	-0.962807	0.385468	-0.690881	-0.840351	-1.05121	-0.368443	0.217022	0.869248	0.247663	-0.0655207	0.404373	0.0886058	-0.265346	0.41256	-0.132722	0.484023	-0.186181	0.291986	0.172429	0.184466	-0.0953009
359.36	-0.067713	-0.955486	0.324246	-0.673846	-0.842105	-1.05852	-0.318732	0.194147	0.871237	0.26178	-0.0971144	0.42547	0.0837255	-0.247984	0.41137	-0.12279	0.516118	-0.214104	0.31204	0.182289	0.203134	-0.0985243
359.84	-0.118678	-0.954163	0.282429	-0.672806	-0.852422	-1.07398	-0.264785	0.16569	0.879195	0.280677	-0.152054	0.421168	0.0769174	-0.24607	0.421731	-0.109962	0.526847	-0.224646	0.339885	0.19921	0.222916	-0.0965897
360.32	-0.129418	-0.951628	0.261908	-0.690988	-0.871717	-1.08406	-0.208288	0.138257	0.905193	0.300533	-0.215175	0.392535	0.0664166	-0.255154	0.44029	-0.0973279	0.532661	-0.219689	0.370845	0.217287	0.234782	-0.0879625
360.8	-0.0990064	-0.945759	0.255634	-0.718241	-0.89527	-1.08593	-0.155039	0.117679	0.953255	0.314377	-0.270684	0.349171	0.0554239	-0.262563	0.458862	-0.0888311	0.542633	-0.20905	0.39895	0.232175	0.23487	-0.0736889
361.28	-0.0382282	-0.937533	0.253889	-0.728771	-0.919741	-1.08362	-0.110889	0.106577	1.01424	0.320611	-0.304616	0.308598	0.0461865	-0.257582	0.467534	-0.0873187	0.559546	-0.205677	0.420003	0.24164	0.221617	-0.0567377
361.76	0.0340436	-0.92997	0.248661	-0.708221	-0.938081	-1.0863	-0.0801096	0.102882	1.07056	0.322929	-0.324547	0.289229	0.0418064	-0.242126	0.462279	-0.0935271	0.578746	-0.217422	0.43393	0.246439	0.201124	-0.0394753
362.24	0.0966378	-0.926931	0.238469	-0.660592	-0.950252	-1.10019	-0.0588961	0.101973	1.10958	0.330889	-0.348518	0.296381	0.04259	-0.231151	0.439835	-0.102004	0.593366	-0.242954	0.442259	0.247622	0.183012	-0.0232838
362.72	0.136478	-0.928676	0.224261	-0.607854	-0.956601	-1.12124	-0.0392143	0.0990409	1.1333	0.354069	-0.395732	0.321888	0.0471156	-0.238882	0.402951	-0.112186	0.599666	-0.27519	0.446252	0.246555	0.173803	-0.00735958
363.2	0.158868	-0.934626	0.208063	-0.570599	-0.95668	-1.13882	-0.0151669	0.0934518	1.15906	0.391068	-0.473735	0.343762	0.0542946	-0.268015	0.354916	-0.123986	0.598846	-0.308932	0.445593	0.244177	0.172176	0.00906186
363.68	0.179693	-0.944262	0.188063	-0.557323	-0.949896	-1.14013	0.0154009	0.0866612	1.20928	0.434634	-0.57558	0.341655	0.0621567	-0.30652	0.307335	-0.138331	0.596071	-0.341567	0.436533	0.242311	0.171266	0.027986
364.16	0.212112	-0.959151	0.162495	-0.557331	-0.937039	-1.11703	0.0466296	0.0811688	1.29129	0.472423	-0.682244	0.310669	0.071584	-0.336858	0.26968	-0.152646	0.596664	-0.374125	0.419873	0.243816	0.164528	0.0489455
364.64	0.264595	-0.982302	0.130337	-0.55199	-0.922207	-1.07736	0.0714616	0.0791503	1.38907	0.494666	-0.77558	0.26308	0.0817929	-0.351136	0.244463	-0.166506	0.600808	-0.407301	0.398752	0.25069	0.148256	0.0703942
365.12	0.326958	-1.01466	0.0958609	-0.532223	-0.915247	-1.03868	0.0876388	0.0807265	1.47286	0.502655	-0.847334	0.219197	0.0913564	-0.356337	0.231675	-0.175347	0.605024	-0.437892	0.378846	0.259034	0.127991	0.0914688
365.6	0.383574	-1.05581	0.0662831	-0.502646	-0.918438	-1.00893	0.0990276	0.0847172	1.5198	0.508488	-0.899559	0.199081	0.0981622	-0.362509	0.223861	-0.180895	0.600286	-0.464003	0.365793	0.266543	0.111669	0.110797
366.08	0.420861	-1.10347	0.0470895	-0.479491	-0.929542	-0.985203	0.113987	0.0904039	1.53079	0.529315	-0.934496	0.207015	0.100672	-0.376753	0.216071	-0.184291	0.581319	-0.484176	0.361072	0.268458	0.103014	0.126932
366.56	0.439245	-1.15289	0.0360643	-0.472667	-0.941639	-0.961539	0.140297	0.0974099	1.52702	0.572445	-0.952823	0.237309	0.0980876	-0.393473	0.204385	-0.187079	0.546486	-0.499109	0.361952	0.266015	0.10234	0.137508
367.04	0.445616	-1.19961	0.0268349	-0.473344	-0.9468	-0.93703	0.175872	0.105567	1.5356	0.636024	-0.954917	0.274494	0.0913831	-0.400375	0.190381	-0.189	0.501611	-0.510954	0.362391	0.262911	0.10724	0.142892
367.52	0.452216	-1.24055	0.0104041	-0.458987	-0.941933	-0.921444	0.213731	0.112202	1.56644	0.70345	-0.942657	0.3095	0.0846781	-0.389799	0.174702	-0.191488	0.455647	-0.520866	0.358942	0.262902	0.112132	0.145169
368	0.460217	-1.27441	-0.0155935	-0.408649	-0.929363	-0.925615	0.246572	0.114779	1.60511	0.754469	-0.924921	0.338075	0.0812198	-0.366853	0.159754	-0.193064	0.419561	-0.527208	0.350521	0.268608	0.116436	0.14772
368.48	0.460368	-1.30026	-0.0470943	-0.316726	-0.91532	-0.950557	0.27459	0.110994	1.62684	0.773676	-0.913004	0.359734	0.0820921	-0.346312	0.144851	-0.198359	0.397515	-0.526624	0.339206	0.277436	0.120353	0.151818
368.96	0.438482	-1.32206	-0.0769209	-0.200563	-0.904678	-0.974957	0.300458	0.102395	1.61066	0.758165	-0.909196	0.375407	0.0869594	-0.339723	0.128504	-0.208738	0.388691	-0.516566	0.327145	0.284934	0.126354	0.157593
369.44	0.382754	-1.34378	-0.0998388	-0.0891469	-0.897047	-0.971358	0.33246	0.0919068	1.55882	0.718037	-0.912314	0.384415	0.0943783	-0.347763	0.11095	-0.223736	0.386521	-0.496187	0.316145	0.288577	0.133654	0.162892
369.92	0.297333	-1.36831	-0.114801	-0.0071732	-0.888836	-0.925079	0.372052	0.0849283	1.49331	0.668978	-0.914614	0.386045	0.101835	-0.357703	0.0939666	-0.231218	0.384747	-0.46767	0.306699	0.28975	0.141429	0.167742
370.4	0.197871	-1.39749	-0.124277	0.0415939	-0.876082	-0.849594	0.413421	0.08405	1.43627	0.628079	-0.90613	0.379802	0.107389	-0.354373	0.0765263	-0.220087	0.381634	-0.435903	0.301199	0.291053	0.148239	0.174253
370.88	0.105541	-1.43142	-0.131284	0.0654259	-0.861673	-0.775711	0.446986	0.0900905	1.39874	0.603276	-0.892867	0.369675	0.110818	-0.331232	0.0583658	-0.185984	0.379062	-0.406156	0.302643	0.296183	0.155438	0.187415
371.36	0.0347236	-1.47005	-0.138106	0.0819628	-0.849566	-0.735743	0.46418	0.101231	1.37503	0.595455	-0.876731	0.357932	0.114829	-0.294476	0.0393625	-0.137615	0.380589	-0.383652	0.315341	0.305412	0.166601	0.209273
371.84	-0.0101414	-1.51126	-0.142803	0.108066	-0.845749	-0.737718	0.457961	0.113601	1.35297	0.593757	-0.866235	0.348024	0.123037	-0.259326	0.0228639	-0.0915761	0.384462	-0.369419	0.341286	0.315522	0.184631	0.236564
372.32	-0.0398781	-1.55489	-0.141613	0.143707	-0.846982	-0.753876	0.431048	0.124725	1.33411	0.588288	-0.861946	0.339593	0.138076	-0.239731	0.0118677	-0.0592309	0.3855	-0.361586	0.375718	0.323691	0.211619	0.263174
372.8	-0.0689352	-1.59796	-0.134894	0.183939	-0.847069	-0.747254	0.389846	0.13256	1.32567	0.57416	-0.846894	0.331649	0.158818	-0.239086	0.0122252	-0.0429867	0.377189	-0.355997	0.412296	0.32811	0.245281	0.281657
373.28	-0.101914	-1.63708	-0.124769	0.221084	-0.837382	-0.697749	0.34251	0.138317	1.34135	0.554671	-0.805931	0.32518	0.182332	-0.247956	0.0270208	-0.0338538	0.356789	-0.350075	0.44148	0.328668	0.283602	0.290433
373.76	-0.138312	-1.66706	-0.116104	0.250776	-0.813913	-0.607648	0.294293	0.144177	1.38263	0.53518	-0.738191	0.322221	0.201873	-0.256275	0.0530397	-0.0196445	0.329324	-0.344472	0.459421	0.328836	0.322634	0.293193
374.24	-0.165915	-1.68198	-0.111536	0.276313	-0.783553	-0.504778	0.250106	0.154216	1.43541	0.515551	-0.655925	0.325262	0.211622	-0.255807	0.0852469	0.00126655	0.301023	-0.341565	0.465623	0.328915	0.360202	0.294649
374.72	-0.171024	-1.68167	-0.110971	0.303404	-0.752711	-0.429103	0.215328	0.169769	1.47298	0.48932	-0.578341	0.334987	0.210325	-0.246681	0.114138	0.0237229	0.274779	-0.345476	0.462971	0.332172	0.395624	0.297439
375.2	-0.153534	-1.67145	-0.109476	0.336615	-0.729894	-0.40668	0.193615	0.189536	1.47436	0.445328	-0.52237	0.349606	0.203087	-0.232782	0.13678	0.0354966	0.246766	-0.359247	0.456102	0.340704	0.430374	0.299991
375.68	-0.125665	-1.65987	-0.102001	0.365239	-0.720403	-0.440338	0.189462	0.208837	1.43489	0.380299	-0.490927	0.361537	0.198042	-0.215614	0.152716	0.0315487	0.212101	-0.382328	0.446833	0.355216	0.463872	0.299942
376.16	-0.109651	-1.65501	-0.0857406	0.379055	-0.721855	-0.513894	0.20345	0.220253	1.37133	0.303282	-0.47278	0.363651	0.202419	-0.19495	0.160507	0.0173321	0.16918	-0.413466	0.43714	0.374977	0.497618	0.297517
376.64	-0.125862	-1.65601	-0.0622141	0.368169	-0.727814	-0.590568	0.231391	0.21946	1.30807	0.232485	-0.451771	0.351774	0.217521	-0.167022	0.166416	0.00169699	0.126204	-0.448031	0.425852	0.397221	0.530079	0.295055
377.12	-0.176348	-1.65712	-0.0357763	0.340845	-0.731426	-0.636055	0.267433	0.206938	1.2681	0.185188	-0.415646	0.328823	0.238917	-0.129742	0.174912	-0.00781241	0.094684	-0.48145	0.415285	0.417418	0.556684	0.295707
377.6	-0.245784	-1.65177	-0.0123839	0.322638	-0.734138	-0.619212	0.301127	0.188291	1.25487	0.167434	-0.364555	0.300923	0.256728	-0.0887021	0.187189	-0.0107606	0.082033	-0.50961	0.407681	0.433459	0.57388	0.30056
378.08	-0.301966	-1.63727	0.00710354	0.341267	-0.736063	-0.529948	0.324773	0.17234	1.25557	0.167808	-0.311405	0.279064	0.263118	-0.0516743	0.203799	-0.0129682	0.0839825	-0.529026	0.403353	0.445228	0.576616	0.306279
378.56	-0.320638	-1.61974	0.02167	0.411552	-0.744284	-0.382073	0.334029	0.166224	1.25411	0.173312	-0.272791	0.2708	0.256114	-0.0298455	0.221385	-0.020401	0.0882975	-0.537552	0.401039	0.453452	0.569317	0.310585
379.04	-0.290949	-1.60832	0.0356691	0.528293	-0.760549	-0.208103	0.32779	0.171235	1.23792	0.176016	-0.263257	0.278587	0.240923	-0.0285195	0.232764	-0.0303346	0.0827618	-0.53751	0.396596	0.458613	0.556349	0.309706
379.52	-0.225295	-1.60578	0.0521535	0.661723	-0.777996	-0.0413865	0.307464	0.182342	1.20803	0.182467	-0.284751	0.301278	0.22759	-0.0486849	0.234978	-0.0378135	0.0641925	-0.53187	0.387827	0.459113	0.54494	0.305236
380	-0.155479	-1.60706	0.0727837	0.779257	-0.794434	0.0917993	0.27325	0.192164	1.17432	0.203511	-0.325765	0.331633	0.222935	-0.0860776	0.226988	-0.0372967	0.0401398	-0.525044	0.374983	0.453394	0.539001	0.300247
380.48	-0.112561	-1.60703	0.0990962	0.864843	-0.804727	0.189082	0.227396	0.193934	1.14381	0.245538	-0.375946	0.361986	0.228795	-0.134186	0.212894	-0.0280371	0.0224142	-0.519552	0.36292	0.439845	0.534143	0.296063
380.96	-0.119939	-1.59835	0.134472	0.9239	-0.810929	0.260749	0.170347	0.185265	1.11628	0.303596	-0.423208	0.385403	0.241192	-0.185467	0.198872	-0.0105222	0.0170844	-0.516631	0.354118	0.421825	0.523887	0.290438
381.44	-0.168864	-1.58295	0.18006	0.975881	-0.820454	0.324336	0.104159	0.167459	1.08333	0.361632	-0.464583	0.398857	0.253922	-0.230587	0.188853	0.0106061	0.0199113	-0.515667	0.349273	0.405597	0.502808	0.281805
381.92	-0.231502	-1.56792	0.232789	1.03732	-0.838192	0.386714	0.0359867	0.144601	1.03419	0.408716	-0.504699	0.402227	0.262491	-0.260698	0.182548	0.0343258	0.0197888	-0.516577	0.345456	0.400109	0.473007	0.268365
382.4	-0.275367	-1.55671	0.289873	1.10478	-0.864069	0.45032	-0.0226957	0.120626	0.961127	0.438788	-0.549431	0.40011	0.266773	-0.269512	0.178953	0.0659506	0.00779814	-0.520633	0.337713	0.409493	0.440468	0.249231
382.88	-0.27429	-1.54809	0.346661	1.16297	-0.892117	0.50937	-0.0630012	0.0984793	0.866685	0.457062	-0.604595	0.39612	0.271132	-0.257521	0.176093	0.105266	-0.0164672	-0.525923	0.322683	0.431882	0.410927	0.228889
383.36	-0.223346	-1.53629	0.398279	1.19211	-0.913864	0.55191	-0.0772598	0.0807471	0.755329	0.469879	-0.677338	0.39378	0.279323	-0.231294	0.174745	0.152222	-0.0440437	-0.53088	0.302634	0.460187	0.385201	0.209486
383.84	-0.140279	-1.54696	0.444672	1.18791	-0.923079	0.565059	-0.0655459	0.0675544	0.636592	0.478962	-0.763462	0.39497	0.293698	-0.203102	0.176994	0.20086	-0.062726	-0.532287	0.282815	0.484153	0.362262	0.192353
384.32	-0.0552189	-1.52081	0.487146	1.15546	-0.923125	0.544812	-0.033785	0.0580245	0.521101	0.481381	-0.859117	0.399075	0.311127	-0.183145	0.185914	0.243623	-0.0651091	-0.526953	0.268491	0.498895	0.339575	0.177327
384.8	0.000546664	-1.49043	0.523521	1.11184	-0.919942	0.488212	0.00523811	0.0496788	0.418188	0.475769	-0.952606	0.408567	0.326446	-0.177701	0.197518	0.27575	-0.051785	-0.514293	0.259944	0.503242	0.312541	0.16372
385.28	0.0140495	-1.46071	0.552958	1.06693	-0.918353	0.401537	0.0379447	0.0402971	0.340075	0.463289	-1.03402	0.424819	0.334112	-0.18577	0.209678	0.297008	-0.0322412	-0.495009	0.253567	0.500278	0.280918	0.152334
385.76	-0.00983582	-1.43017	0.571721	1.02691	-0.920543	0.299049	0.0564791	0.0292225	0.29331	0.448907	-1.08794	0.44892	0.33195	-0.202394	0.218696	0.308959	-0.0178611	-0.472693	0.245413	0.494468	0.245273	0.146778
386.24	-0.0575949	-1.39422	0.577402	0.990406	-0.92373	0.197842	0.0558808	0.0189064	0.279782	0.437183	-1.1101	0.477943	0.321199	-0.225261	0.223976	0.314319	-0.0148328	-0.449254	0.233749	0.488688	0.20866	0.149628
386.72	-0.110253	-1.35335	0.574749	0.957763	-0.923831	0.102177	0.0412101	0.0124537	0.294453	0.42912	-1.10445	0.509209	0.306789	-0.252224	0.224093	0.315001	-0.0207218	-0.426388	0.224116	0.480669	0.176891	0.160903
387.2	-0.149648	-1.30906	0.565732	0.933288	-0.92186	0.0149734	0.0197044	0.0109365	0.326202	0.421495	-1.08106	0.538893	0.292391	-0.281996	0.218382	0.309049	-0.027612	-0.404848	0.221555	0.470687	0.153968	0.178599
387.68	-0.165482	-1.26609	0.552399	0.924622	-0.922373	-0.0816849	-0.00114289	0.0131043	0.362115	0.410464	-1.04834	0.566722	0.281923	-0.314226	0.20779	0.296354	-0.0267388	-0.387118	0.228743	0.458915	0.144556	0.198889
388.16	-0.154638	-1.22668	0.539406	0.935093	-0.929221	-0.205644	-0.0181825	0.0154325	0.397201	0.396071	-1.01437	0.593502	0.275391	-0.344623	0.194862	0.275269	-0.0138771	-0.375036	0.239046	0.4518	0.153746	0.218555
388.64	-0.124116	-1.18972	0.525318	0.961911	-0.939032	-0.366151	-0.031665	0.0149612	0.431161	0.382808	-0.980457	0.620422	0.270961	-0.369604	0.186428	0.24944	0.00709307	-0.371859	0.242877	0.452782	0.179437	0.236583
389.12	-0.0858349	-1.1489	0.508237	0.998876	-0.946921	-0.558919	-0.04113	0.0108826	0.472065	0.373758	-0.945199	0.644928	0.26429	-0.388077	0.190259	0.222929	0.0285804	-0.377918	0.232282	0.461282	0.215887	0.25326
389.6	-0.0518082	-1.10119	0.490161	1.036	-0.950256	-0.759363	-0.0447832	0.00594319	0.52221	0.367623	-0.907737	0.660819	0.254043	-0.400789	0.207639	0.199918	0.042854	-0.393225	0.205157	0.474232	0.254159	0.269723
390.08	-0.0352082	-1.04708	0.468746	1.06481	-0.947453	-0.943033	-0.0372179	0.00165603	0.577387	0.360277	-0.868566	0.663363	0.242008	-0.40627	0.232528	0.181907	0.047562	-0.414715	0.16878	0.484856	0.284486	0.285393
390.56	-0.0319432	-0.991802	0.447464	1.08087	-0.94596	-1.09856	-0.0161681	-0.000898016	0.628189	0.344034	-0.830544	0.654872	0.233021	-0.403654	0.251659	0.168289	0.0428462	-0.437051	0.133009	0.490575	0.30382	0.297906
391.04	-0.0301345	-0.942538	0.426887	1.08995	-0.95109	-1.23606	0.0166153	-0.00237458	0.662392	0.315511	-0.797667	0.642649	0.231873	-0.391606	0.254715	0.162097	0.0296558	-0.45601	0.103289	0.491879	0.312579	0.306889
391.52	-0.0133976	-0.905033	0.409491	1.10042	-0.96476	-1.37382	0.0554642	-0.00370351	0.677721	0.275696	-0.770227	0.637202	0.237801	-0.371499	0.241715	0.161141	0.00814197	-0.468073	0.080955	0.491559	0.316786	0.311314
392	0.0269554	-0.884279	0.399838	1.12681	-0.984113	-1.5136	0.0943039	-0.00345811	0.673089	0.232233	-0.746029	0.642491	0.246222	-0.343995	0.220923	0.165904	-0.0235154	-0.471805	0.0601222	0.489483	0.325084	0.315554
392.48	0.0822785	-0.882796	0.399464	1.17273	-1.00455	-1.6329	0.131052	-0.000449007	0.660202	0.19252	-0.72615	0.654861	0.249627	-0.315194	0.203854	0.171855	-0.0635444	-0.466829	0.0364239	0.48299	0.340331	0.32359
392.96	0.1343	-0.896174	0.408203	1.23234	-1.02193	-1.68683	0.168121	0.00732556	0.652165	0.164136	-0.707344	0.665306	0.243359	-0.285919	0.192148	0.173163	-0.104502	-0.453883	0.010411	0.466431	0.363597	0.338029
393.44	0.161472	-0.918225	0.419835	1.29474	-1.0337	-1.64422	0.210693	0.0188037	0.65434	0.144874	-0.691341	0.666466	0.230006	-0.255281	0.180498	0.163901	-0.136698	-0.43243	-0.0116639	0.441198	0.389237	0.357885
393.92	0.158229	-0.942076	0.430309	1.34547	-1.03958	-1.50461	0.258628	0.0314932	0.662932	0.127482	-0.684641	0.656293	0.217858	-0.21821	0.155725	0.141009	-0.153872	-0.40233	-0.0213345	0.410453	0.411202	0.378862
394.4	0.132016	-0.959762	0.435575	1.37624	-1.04036	-1.31903	0.309755	0.0425881	0.670792	0.101672	-0.689938	0.636925	0.215992	-0.17353	0.112293	0.109984	-0.156657	-0.367219	-0.0155632	0.38115	0.427883	0.395887
394.88	0.100898	-0.967286	0.437639	1.38585	-1.03681	-1.15238	0.357799	0.0511116	0.669476	0.0607224	-0.706821	0.611471	0.225576	-0.124043	0.0540648	0.0795475	-0.152997	-0.335279	0.00408917	0.359372	0.437557	0.407504
395.36	0.079541	-0.965292	0.442815	1.39029	-1.03238	-1.05392	0.401124	0.0589074	0.653225	0.0023366	-0.728395	0.578143	0.244146	-0.0777065	-0.00660459	0.0596116	-0.151107	-0.31478	0.0309435	0.344783	0.445268	0.416499
395.84	0.0721344	-0.957693	0.455554	1.39572	-1.02839	-1.02688	0.438677	0.0664148	0.617655	-0.0662481	-0.745879	0.536933	0.2643	-0.0421087	-0.0607305	0.0536926	-0.155341	-0.311186	0.0593318	0.336108	0.454806	0.427956
396.32	0.0737045	-0.94794	0.477226	1.4004	-1.02831	-1.03237	0.475671	0.0732757	0.57033	-0.134794	-0.749774	0.487684	0.280384	-0.0199799	-0.10731	0.056114	-0.160327	-0.322199	0.0860041	0.331156	0.468138	0.4432
396.8	0.0713134	-0.938198	0.502592	1.39589	-1.03105	-1.02472	0.513213	0.077242	0.511478	-0.197929	-0.74052	0.440073	0.293036	-0.0110602	-0.151479	0.0591144	-0.160088	-0.336713	0.110014	0.33088	0.484945	0.460223
397.28	0.0600482	-0.92981	0.52173	1.37399	-1.0355	-0.980992	0.549368	0.0765815	0.445969	-0.254987	-0.727362	0.403181	0.304547	-0.0103485	-0.199614	0.0573114	-0.149888	-0.343268	0.131146	0.336038	0.504713	0.474054
397.76	0.0351807	-0.920414	0.527173	1.34699	-1.03535	-0.914489	0.582799	0.0707171	0.381027	-0.308961	-0.722223	0.381784	0.318227	-0.0137417	-0.253359	0.0492095	-0.131903	-0.332121	0.146481	0.347343	0.525059	0.481986
398.24	-0.00213935	-0.906955	0.514456	1.3416	-1.02758	-0.852438	0.608795	0.0618665	0.318652	-0.36123	-0.7354	0.370974	0.334278	-0.0187938	-0.306509	0.041974	-0.114543	-0.304668	0.151657	0.362054	0.544905	0.4838
398.72	-0.0484728	-0.889976	0.487729	1.37736	-1.01218	-0.816558	0.630341	0.0513097	0.269696	-0.40668	-0.762234	0.357684	0.350727	-0.0248177	-0.350577	0.0469116	-0.103713	-0.268258	0.146258	0.377254	0.561303	0.482662
399.2	-0.0978511	-0.871211	0.453079	1.45148	-0.996509	-0.799103	0.651417	0.0390299	0.245275	-0.438361	-0.785366	0.331022	0.364091	-0.0294932	-0.381303	0.0683357	-0.101329	-0.231203	0.132447	0.391974	0.572432	0.481612
399.68	-0.136659	-0.855338	0.417816	1.53262	-0.98691	-0.780159	0.675084	0.0233842	0.252906	-0.450866	-0.786813	0.294636	0.372722	-0.0284991	-0.397794	0.10556	-0.104213	-0.199295	0.115721	0.40615	0.576347	0.478981
400.16	-0.158	-0.848926	0.385035	1.58151	-0.987267	-0.744774	0.699541	0.00355044	0.290601	-0.446749	-0.75835	0.262214	0.389621	-0.0180439	-0.403217	0.148181	-0.10886	-0.173273	0.103075	0.419105	0.574748	0.470173
400.64	-0.16265	-0.852981	0.356679	1.58027	-0.99919	-0.697604	0.718891	-0.0179465	0.346018	-0.434317	-0.712561	0.250121	0.386654	0.0023875	-0.399796	0.185263	-0.114203	-0.151965	0.0973109	0.43054	0.570775	0.451218
401.12	-0.154108	-0.86087	0.327195	1.54955	-1.0169	-0.660391	0.724065	-0.0352436	0.39833	-0.421042	-0.67709	0.26601	0.374589	0.0272483	-0.387764	0.211232	-0.122894	-0.134593	0.0991819	0.437183	0.569614	0.421159
401.6	-0.145283	-0.86167	0.291397	1.52252	-1.03116	-0.655575	0.709981	-0.0427326	0.431282	-0.410177	-0.674621	0.305447	0.354189	0.0478105	-0.369073	0.227684	-0.136348	-0.123308	0.105768	0.438128	0.571711	0.384491
402.08	-0.142274	-0.84755	0.246365	1.51713	-1.0373	-0.685487	0.680861	-0.0372174	0.440474	-0.399659	-0.709563	0.35652	0.327634	0.0577812	-0.346292	0.242909	-0.151511	-0.119139	0.114978	0.434693	0.578709	0.348437
402.56	-0.141534	-0.817662	0.193249	1.52211	-1.03602	-0.731026	0.644732	-0.0202906	0.434739	-0.388362	-0.760144	0.406172	0.299699	0.0573136	-0.327826	0.259389	-0.162177	-0.120354	0.128018	0.432744	0.586193	0.318776
403.04	-0.135434	-0.778731	0.138574	1.51163	-1.03131	-0.764798	0.610624	0.00369885	0.429119	-0.375125	-0.792506	0.451464	0.275141	0.0553431	-0.322576	0.274074	-0.162411	-0.122604	0.147884	0.438005	0.592396	0.297804
403.52	-0.122208	-0.742142	0.091658	1.48071	-1.02758	-0.765007	0.585879	0.0310441	0.435908	-0.361985	-0.783293	0.492174	0.256909	0.0605167	-0.335944	0.277148	-0.152731	-0.120453	0.175303	0.452083	0.593935	0.286518
404	-0.108459	-0.714368	0.0591939	1.45753	-1.0266	-0.733818	0.570273	0.0614078	0.452601	-0.350356	-0.73195	0.529563	0.243732	0.0781852	-0.361995	0.263347	-0.138973	-0.110057	0.207372	0.471092	0.591061	0.282324
404.48	-0.111289	-0.690958	0.042206	1.48277	-1.02148	-0.691286	0.561222	0.0953076	0.468873	-0.337347	-0.664814	0.556928	0.233531	0.104516	-0.389806	0.237883	-0.128488	-0.0907124	0.236743	0.488733	0.586172	0.283651
404.96	-0.142923	-0.665534	0.0378842	1.56747	-1.00672	-0.659696	0.555232	0.132414	0.478546	-0.319725	-0.615546	0.56413	0.222756	0.128885	-0.407839	0.212649	-0.125207	-0.0642447	0.257245	0.500221	0.575467	0.28815
405.44	-0.202252	-0.636395	0.041092	1.66662	-0.980865	-0.645489	0.554572	0.169664	0.477701	-0.297569	-0.598766	0.549099	0.208463	0.143283	-0.410735	0.20265	-0.127186	-0.0363312	0.268267	0.502282	0.558886	0.291424
405.92	-0.272953	-0.609662	0.0464626	1.71561	-0.950147	-0.643411	0.560941	0.20227	0.471489	-0.27487	-0.605486	0.521102	0.190094	0.14818	-0.402778	0.21193	-0.129109	-0.0135451	0.274755	0.496326	0.544049	0.289185
406.4	-0.333728	-0.599328	0.0542058	1.6927	-0.922872	-0.629791	0.573927	0.225229	0.460686	-0.257095	-0.612364	0.497243	0.168063	0.151073	-0.394483	0.234655	-0.128306	-0.000675328	0.28622	0.482531	0.529318	0.280966
406.88	-0.372261	-0.615314	0.0685017	1.65461	-0.907217	-0.590225	0.593383	0.237422	0.440289	-0.244627	-0.597876	0.498754	0.145192	0.1636	-0.394324	0.261233	-0.127124	-0.00165894	0.308562	0.463204	0.516092	0.268522
407.36	-0.390807	-0.651522	0.0906329	1.70823	-0.903147	-0.525884	0.613838	0.239695	0.407906	-0.23048	-0.567756	0.53424	0.124156	0.189641	-0.405087	0.284334	-0.128295	-0.0164215	0.341765	0.44246	0.502733	0.256198
407.84	-0.396953	-0.689965	0.119255	1.92626	-0.903573	-0.448809	0.62928	0.234448	0.368116	-0.205813	-0.538259	0.596415	0.10886	0.2239	-0.421165	0.304377	-0.135457	-0.0416788	0.377414	0.425103	0.485688	0.249548
408.32	-0.39994	-0.7102	0.151467	2.27796	-0.899352	-0.379446	0.637954	0.224346	0.336787	-0.166405	-0.527119	0.666009	0.103015	0.254732	-0.433595	0.325678	-0.144654	-0.0744783	0.407127	0.415108	0.464213	0.251733
408.8	-0.404797	-0.702298	0.180801	2.63631	-0.885572	-0.324073	0.641451	0.210103	0.332917	-0.120398	-0.539376	0.72287	0.106871	0.271964	-0.434938	0.344476	-0.150192	-0.110103	0.42761	0.414323	0.440735	0.261246
409.28	-0.404372	-0.674832	0.208678	2.8624	-0.860735	-0.277036	0.645873	0.193592	0.365981	-0.0798191	-0.558371	0.755795	0.117221	0.274716	-0.424148	0.353622	-0.147919	-0.144463	0.441938	0.416935	0.419663	0.275419
409.76	-0.392366	-0.648046	0.234623	2.89559	-0.82883	-0.232379	0.656131	0.176897	0.43001	-0.0530051	-0.565706	0.768361	0.12901	0.271578	-0.408702	0.345917	-0.139126	-0.171477	0.456928	0.417288	0.407946	0.288705
410.24	-0.373614	-0.637675	0.264427	2.79321	-0.789478	-0.187367	0.673708	0.161739	0.503956	-0.0404695	-0.561352	0.7761	0.134977	0.269232	-0.395245	0.321217	-0.128583	-0.185563	0.479341	0.410721	0.407101	0.296539
410.72	-0.358932	-0.647621	0.295624	2.67498	-0.748204	-0.15166	0.695959	0.149097	0.57283	-0.0341703	-0.560927	0.795559	0.130633	0.269494	-0.387403	0.29184	-0.122643	-0.179209	0.50846	0.396414	0.417038	0.297679
411.2	-0.36415	-0.666422	0.323	2.63031	-0.705575	-0.134134	0.717258	0.138082	0.631659	-0.0296002	-0.582812	0.835772	0.114482	0.265533	-0.384391	0.275827	-0.122671	-0.149419	0.539658	0.380257	0.435363	0.290943
[truncated: 185 more rows]

## Sheet: CA3 small ripple
0	719301	521501	659105	580601	526202	525403	525101	521602	719001	520901	719103	521202	525404	719002	520701	525003	521502	521101	719303	719201	525301	525001	659101	521401	580201	580501	521302	520702	521303	521102	521304	719202
[truncated: 2,084 more rows]

[truncated: 4 more sheets: CA1 small ripple, DG big ripple, CA3 big ripple, CA1 big ripple]
